# Supplementary material for: PangenomeNet: a pan-genome-based network reveals functional modules on antimicrobial resistome for Escherichia coli strains
Source: BMC Bioinformatics. 2021 Nov 10;22:548. doi: 10.1186/s12859-021-04459-z (PMC8579557; doi:10.1186/s12859-021-04459-z)
Supplement: Supplementary file 2 — Additional file 2: Table S1. Genome ID and statistics for Escherichia coli genome downloaded from PATRIC on February 2021. [file 12859_2021_4459_MOESM2_ESM.csv]

Genome ID	# contigs (>= 0 bp)	# contigs (>= 1000 bp)	# contigs (>= 5000 bp)	# contigs (>= 10000 bp)	# contigs (>= 25000 bp)	# contigs (>= 50000 bp)	Total length (>= 0 bp)	Total length (>= 1000 bp)	Total length (>= 5000 bp)	Total length (>= 10000 bp)	Total length (>= 25000 bp)	Total length (>= 50000 bp)	# contigs	Largest contig	Total length	GC (%)	N50	N75	L50	L75	# N's per 100 kbp	Sequencing Status	Contigs	Genome Length	GC Content	PATRIC CDS	RefSeq CDS	prodigal_CDS	Completeness	Contamination	include
1328432.3	47	47	29	25	22	19	5087927	5087927	5048907	5026633	4972701	4868743	47	941714	5087927	50.54	419572	203893	4	8	0	WGS	47	5087927	50.5	4907	4683	4686	99.96	0.08	TRUE
1328433.3	5	5	5	5	4	4	5410353	5410353	5410353	5410353	5387874	5387874	5	5076304	5410353	50.63	5076304	5076304	1	1	0	WGS	5	5410353	50.6	5410	5134	5144	99.96	0.81	TRUE
1328434.3	23	22	19	19	18	17	5288563	5288021	5277955	5277955	5261264	5234662	23	849669	5288563	50.69	514200	261463	5	8	0	WGS	23	5288563	50.7	5171	4941	4948	99.96	0.62	TRUE
1328436.3	11	11	9	9	8	6	5503383	5503383	5497928	5497928	5484747	5403794	11	3766414	5503383	50.38	3766414	595956	1	2	0.02	WGS	11	5503383	50.4	5425	5187	5196	99.96	0.51	TRUE
1328437.3	18	18	16	16	15	12	5479839	5479839	5474299	5474299	5461118	5341426	18	1115638	5479839	50.37	544288	359946	4	7	0	WGS	18	5479839	50.4	5436	5190	5193	99.96	0.51	TRUE
1328438.3	15	15	9	9	8	6	5496130	5496130	5480479	5480479	5467298	5386345	15	2430411	5496130	50.38	1439476	596467	2	3	0	WGS	15	5496130	50.4	5419	5180	5188	99.96	0.51	TRUE
1328439.3	52	52	36	31	25	22	5413189	5413189	5373193	5334597	5245253	5124391	52	606390	5413189	50.32	310831	171183	6	12	0	WGS	52	5413189	50.3	5343	5134	5139	99.96	0.51	TRUE
1328441.3	15	15	9	8	7	5	5509549	5509549	5490751	5485583	5472402	5396372	15	4063444	5509549	50.39	4063444	595566	1	2	0	WGS	15	5509549	50.4	5430	5193	5202	99.96	0.51	TRUE
1328442.3	14	14	11	11	10	8	5508202	5508202	5501823	5501823	5488544	5407728	14	1906977	5508202	50.38	1677481	730308	2	3	0	WGS	14	5508202	50.4	5426	5186	5194	99.96	0.51	TRUE
1328443.3	16	16	14	13	10	9	5467890	5467890	5463981	5455118	5399384	5365558	16	1295375	5467890	50.43	851919	403502	3	5	0	WGS	16	5467890	50.4	5391	5164	5171	99.96	0.51	TRUE
1328444.3	16	16	14	14	11	10	5486042	5486042	5482544	5482544	5429099	5395371	16	1405602	5486042	50.37	836780	432204	3	5	0	WGS	16	5486042	50.4	5425	5186	5192	99.96	0.51	TRUE
1328445.3	5	5	4	4	4	3	5523477	5523477	5521276	5521276	5521276	5487450	5	5097434	5523477	50.43	5097434	5097434	1	1	0	WGS	5	5523477	50.4	5446	5205	5214	99.96	0.51	TRUE
1328446.3	30	30	26	22	19	17	5343200	5343200	5330539	5307834	5262029	5204880	30	799118	5343200	50.72	503255	212860	5	8	0	WGS	30	5343200	50.7	5323	5066	5075	99.96	0.81	TRUE
1328447.3	18	17	17	15	15	13	5347131	5346559	5346559	5332275	5332275	5274924	18	758337	5347131	50.72	675905	441031	4	7	0	WGS	18	5347131	50.7	5322	5061	5068	99.96	0.81	TRUE
1328448.3	17	17	14	14	14	14	4653786	4653786	4647933	4647933	4647933	4647933	17	993786	4653786	50.76	831510	297793	3	6	0	WGS	17	4653786	50.8	4568	4392	4403	99.86	0.08	TRUE
1328449.3	34	33	22	19	16	14	5249867	5249307	5224118	5206538	5159140	5099849	34	781833	5249867	50.82	470547	388301	5	8	0	WGS	34	5249867	50.8	5213	4941	4947	99.96	0.11	TRUE
1328450.3	30	30	15	13	12	12	4855466	4855466	4819515	4804915	4790543	4790543	30	1396166	4855466	50.92	1105895	278725	2	6	0	WGS	30	4855466	50.9	4765	4622	4632	99.96	0.23	TRUE
1400156.3	14	14	10	10	9	7	5388459	5388459	5377499	5377499	5364358	5297500	14	2092145	5388459	50.35	1014274	582039	2	4	0	WGS	14	5388459	50.4	5257	5047	5056	99.96	0.43	TRUE
1400157.3	31	26	18	17	17	16	5353135	5348922	5328422	5319771	5319771	5285850	31	783343	5353135	50.34	522898	276121	5	8	0.02	WGS	31	5353135	50.3	5227	5025	5033	99.96	0.43	TRUE
1400158.3	33	33	23	18	18	17	5051406	5051406	5020908	4984848	4984848	4949661	33	936819	5051406	50.68	361440	214708	5	9	0	WGS	33	5051406	50.7	4984	4752	4763	99.96	0.62	TRUE
1438668.3	20	20	18	12	11	10	5373651	5373651	5367725	5321355	5298833	5261202	20	1331390	5373651	50.72	794957	558026	3	5	0.04		20	5373651	50.7	5314	5118	5128	99.96	0.81	TRUE
1438669.3	16	16	16	15	15	15	4660068	4660068	4660068	4654885	4654885	4654885	16	1026179	4660068	50.8	472021	206790	4	7	0		16	4660068	50.8	4420	4342	4346	99.96	0.08	TRUE
1438670.3	21	21	19	16	12	9	5384699	5384699	5380030	5359136	5287746	5173953	21	1677831	5384699	50.73	705442	517034	3	5	0.04		21	5384699	50.7	5317	5124	5134	99.96	0.81	TRUE
1438671.3	19	19	14	14	11	11	5085719	5085719	5078746	5078746	5042964	5042964	19	1039848	5085719	50.8	789640	407765	3	5	0.02		19	5085719	50.8	4967	4796	4804	99.96	0.08	TRUE
1438672.3	19	19	13	13	12	10	5345955	5345955	5335232	5335232	5312726	5238928	19	1414120	5345955	50.72	816168	558666	3	4	0		19	5345955	50.7	5264	5068	5075	99.96	0.81	TRUE
1438673.3	37	36	28	27	26	19	5077115	5076786	5058796	5051568	5030322	4769033	36	734364	5076786	50.6	272156	181752	6	11	0		37	5077115	50.6	4963	4777	4782	99.96	0.62	TRUE
1438674.3	18	18	16	15	9	8	5131875	5131875	5124069	5114319	5016801	4991010	18	2755006	5131875	50.85	2755006	1106878	1	2	0.04		18	5131875	50.8	5003	4836	4845	99.96	0.08	TRUE
1438675.3	47	47	35	31	28	22	5310744	5310744	5293835	5263682	5220265	5033216	47	817876	5310744	50.59	359503	146601	5	12	0.02		47	5310744	50.6	5173	5013	5015	99.96	0.99	TRUE
1438676.3	50	50	36	34	25	22	5035467	5035467	5004566	4989081	4834855	4728982	50	1036159	5035467	50.63	208212	150784	6	13	0.02		50	5035467	50.6	4920	4753	4760	99.96	0.62	TRUE
1438677.3	33	33	31	29	23	21	5039445	5039445	5032487	5017633	4918097	4836138	33	813567	5039445	50.61	299922	129122	5	11	0		33	5039445	50.6	4940	4771	4780	99.96	0.93	TRUE
1438678.3	41	41	28	25	22	17	4973995	4973995	4942143	4916228	4866800	4676008	41	670340	4973995	50.73	431375	208827	5	9	0.04		41	4973995	50.7	4789	4655	4658	99.96	0.08	TRUE
1438679.3	43	43	36	33	24	19	5068691	5068691	5048171	5025058	4857015	4679436	43	620614	5068691	50.79	343128	172350	6	11	0		43	5068691	50.8	4931	4767	4771	100	0.08	TRUE
1438680.3	33	31	29	26	22	16	5012972	5011525	5005910	4982015	4905314	4704828	32	613567	5012511	50.81	325867	267001	6	10	0		33	5012972	50.8	4873	4714	4717	99.96	0.08	TRUE
1438681.3	46	44	36	34	27	21	5224265	5223264	5208383	5196811	5089023	4872979	45	1058456	5223865	50.59	480328	134571	4	11	0		46	5224265	50.6	5034	4897	4903	99.34	0.12	TRUE
1438682.3	24	24	16	15	9	8	5144669	5144669	5119698	5114329	5011648	4974551	24	1194481	5144669	50.77	854500	691878	3	5	0.04		24	5144669	50.8	5029	4869	4879	99.96	0.13	TRUE
1438683.3	37	37	24	21	15	13	5122875	5122875	5091835	5069551	4958594	4883039	37	1495419	5122875	50.79	450616	303194	4	7	0.02		37	5122875	50.8	5042	4883	4889	99.96	0.13	TRUE
1438684.3	35	35	23	22	17	14	5227634	5227634	5207507	5201291	5113531	5007091	35	897982	5227634	50.81	704233	232028	4	7	0		35	5227634	50.8	5164	4963	4969	99.96	0.08	TRUE
1438685.3	72	71	50	40	29	25	5250696	5249781	5201964	5129073	4962809	4810004	72	489019	5250696	50.71	231547	126448	8	16	0.02		72	5250696	50.7	5184	5010	5011	99.96	0.08	TRUE
1438686.3	32	32	24	24	24	17	5000065	5000065	4979743	4979743	4979743	4736723	32	888530	5000065	50.74	519460	212812	4	8	0		32	5000065	50.7	4883	4752	4758	99.65	0.39	TRUE
1438687.3	56	51	39	34	25	20	5029585	5025746	4994517	4952861	4798359	4601847	56	540444	5029585	50.76	317350	171144	6	12	0.04		56	5029585	50.7	4902	4787	4790	99.34	0.54	TRUE
1438688.3	63	62	43	37	30	23	5341964	5341082	5283808	5234548	5096068	4836592	63	506176	5341964	50.77	245580	133906	8	15	0.02		63	5341964	50.8	5191	5015	5021	99.96	0.13	TRUE
1438689.3	42	42	30	25	17	12	5282810	5282810	5249955	5208719	5063873	4886723	42	1076438	5282810	50.85	488690	269553	4	8	0		42	5282810	50.9	5223	5053	5064	99.96	0.08	TRUE
1438691.3	30	30	27	26	20	16	4928679	4928679	4920090	4912164	4811491	4665066	30	626001	4928679	50.52	372907	225910	6	10	0.02		30	4928679	50.5	4824	4675	4683	99.96	0.39	TRUE
1438693.3	32	32	21	17	14	11	5036718	5036718	5011206	4979028	4935153	4830032	32	1331997	5036718	50.65	575594	293459	3	6	0.02		32	5036718	50.7	4755	4610	4616	99.96	0.23	TRUE
1438694.3	34	34	29	24	21	16	5071451	5071451	5061269	5025406	4985259	4795648	34	942602	5071451	50.65	539623	230287	4	7	0.02		34	5071451	50.6	4840	4687	4689	99.96	0.23	TRUE
1438695.3	55	49	38	35	30	23	5414383	5410074	5384849	5360595	5279650	5064673	55	750755	5414383	50.52	341304	125392	6	13	0		55	5414383	50.5	5284	5056	5060	99.96	0.69	TRUE
1438696.3	33	33	31	30	28	20	5227535	5227535	5225071	5216617	5179708	4889401	33	655047	5227535	50.58	363067	174368	6	11	0.02		33	5227535	50.6	5111	4936	4937	99.96	0.39	TRUE
1445862.3	146	146	87	63	52	31	5415668	5415668	5278634	5102265	4899450	4110695	146	467967	5415668	50.32	114668	53569	14	31	0		146	5415668	50.3	5276	5165	5165	99.96	0.43	TRUE
1445863.3	99	99	59	50	38	26	5090477	5090477	4997489	4929426	4715790	4305940	99	402691	5090477	50.47	162884	112915	11	20	0		99	5090477	50.5	4929	4774	4780	99.96	0.08	TRUE
562.12962	35	28	25	25	20	17	5385404	5381762	5371413	5371413	5290398	5190878	31	1227849	5383807	57.42	369542	229410	5	9	0.04		35	5385404	57.42	5288	4978	5088	100	0.08	TRUE
562.13671	98	84	61	52	44	30	4834860	4824825	4769542	4700428	4566044	4047962	98	301097	4834860	50.69	137355	69616	12	24	18.28		98	4834860	50.68	4940	4723	4550	99.96	0.36	TRUE
562.16466	3	3	3	3	3	3	5256426	5256426	5256426	5256426	5256426	5256426	3	5041366	5256426	50.62	5041366	5041366	1	1	0		3	5256426	50.62	5520	5370	5006	99.96	0.33	TRUE
562.17359	2	2	2	2	2	2	5147804	5147804	5147804	5147804	5147804	5147804	2	5012084	5147804	50.8	5012084	5012084	1	1	0		2	5147804	50.8	5116	4822	4832	99.96	0.08	TRUE
562.19151	78	63	45	40	34	23	4921291	4910007	4867492	4832868	4731807	4336764	78	579533	4921291	50.78	193770	106372	8	16	0		78	4921291	50.78	5117	5043	4659	99.96	0.14	TRUE
562.19637	120	96	60	51	35	27	5341776	5325911	5236490	5165078	4936544	4663604	120	370905	5341776	50.61	190926	110650	10	20	0		120	5341776	50.61	5731	5604	5166	99.96	0.08	TRUE
562.19638	131	100	65	59	40	28	5341043	5319380	5234050	5185132	4908136	4504775	131	305101	5341043	50.6	159184	109261	13	23	0		131	5341043	50.6	5748	5614	5169	99.96	0.08	TRUE
562.22428	37	37	27	26	26	21	4739201	4739201	4712147	4707093	4707093	4547949	37	614145	4739201	50.65	297125	180316	6	11	0		37	4739201	50.65	4629		4443	99.96	0.08	TRUE
562.22429	92	92	67	61	48	32	4659158	4659158	4602504	4555468	4327380	3706180	92	278032	4659158	50.58	112456	57107	14	29	0		92	4659158	50.58	4598		4376	99.96	0.08	TRUE
562.2243	85	85	56	47	33	24	5019141	5019141	4958475	4896659	4662322	4339631	85	493521	5019141	50.49	217498	98549	8	17	0		85	5019141	50.49	4969		4685	99.96	0.12	TRUE
562.22431	120	120	81	74	54	31	4757308	4757308	4656826	4601435	4254147	3441840	120	255419	4757308	50.63	91933	46478	16	34	0		120	4757308	50.63	4723		4473	99.59	0.08	TRUE
562.22432	131	131	78	60	38	30	5325326	5325326	5185183	5055985	4683698	4390415	131	396912	5325326	50.65	159218	86470	13	25	0		131	5325326	50.65	5391		5090	99.96	0.08	TRUE
562.22433	62	62	43	38	31	23	4995656	4995656	4953979	4921087	4816201	4552034	62	539522	4995656	50.57	189395	129179	8	15	0		62	4995656	50.57	4972		4707	99.96	0.62	TRUE
562.22434	101	101	68	61	47	29	5133421	5133421	5052084	5003716	4787089	4113537	101	407856	5133421	50.4	133606	61923	11	25	0		101	5133421	50.4	5115		4870	99.96	0.08	TRUE
562.22435	128	128	78	62	48	30	5289619	5289619	5181750	5073768	4822347	4210317	128	351747	5289619	50.62	137182	62914	13	27	0		128	5289619	50.62	5301		5012	99.96	0.13	TRUE
562.22436	89	89	57	49	43	33	5027294	5027294	4953923	4901442	4797567	4439558	89	296791	5027294	50.54	153420	85476	12	23	0		89	5027294	50.54	4992		4748	99.96	0.08	TRUE
562.22437	95	95	47	40	33	23	5067060	5067060	4968336	4917301	4807444	4442517	95	440142	5067060	50.49	185985	129063	9	17	0		95	5067060	50.49	5119		4841	99.65	0.62	TRUE
562.22438	94	94	58	49	35	26	4929923	4929923	4848838	4785608	4549356	4223848	94	363512	4929923	50.41	160986	101842	10	20	0		94	4929923	50.41	4841		4580	99.96	0.12	TRUE
562.22439	89	89	58	46	36	26	5049324	5049324	4973907	4885434	4723774	4381886	89	450145	5049324	50.5	179148	112129	10	19	0		89	5049324	50.5	5007		4740	99.96	0.08	TRUE
562.2244	72	72	51	47	36	26	5014279	5014279	4961436	4934097	4758473	4398774	72	433360	5014279	50.73	178565	114474	11	19	0		72	5014279	50.73	4960		4722	99.96	0.08	TRUE
562.22441	113	113	69	59	40	25	5154450	5154450	5052802	4978503	4664019	4127546	113	449763	5154450	50.54	163811	73895	11	22	0.21		113	5154450	50.54	5150		4860	99.96	0.08	TRUE
562.22442	133	133	65	54	37	28	5086528	5086528	4962088	4890176	4612308	4278939	133	424849	5086528	50.7	173799	87086	12	22	0		133	5086528	50.7	5129		4870	99.5	0.08	TRUE
562.22443	108	108	64	52	40	28	4976712	4976712	4871714	4784598	4599097	4169914	108	354541	4976712	50.47	168517	84589	11	22	0		108	4976712	50.47	4921		4659	99.96	0.08	TRUE
562.22444	88	88	49	41	30	22	4999725	4999725	4908692	4849402	4694441	4406504	88	524826	4999725	50.43	192376	113096	8	16	0		88	4999725	50.43	4921		4642	99.96	0.08	TRUE
562.22445	93	93	59	49	37	22	4958917	4958917	4871711	4803415	4611124	4101695	93	362688	4958917	50.73	182135	106047	10	18	0		93	4958917	50.73	4932		4680	99.96	0.11	TRUE
562.22446	111	111	63	46	35	24	5064741	5064741	4954376	4826062	4650930	4299891	111	362392	5064741	50.42	202446	105116	9	18	0		111	5064741	50.42	5025		4728	99.96	0.08	TRUE
562.22447	76	76	52	43	35	23	5139876	5139876	5087835	5029040	4894612	4457231	76	519977	5139876	50.57	185897	121058	8	17	0		76	5139876	50.57	5164		4870	99.96	0.62	TRUE
562.22448	76	76	53	49	41	24	4972652	4972652	4915330	4886485	4777739	4228484	76	469291	4972652	50.57	180605	101672	9	18	0		76	4972652	50.57	4887		4633	99.96	0.15	TRUE
562.22449	131	131	97	80	59	30	4869761	4869761	4792881	4675076	4291339	3138811	131	341924	4869761	50.64	79807	42201	20	41	0		131	4869761	50.64	4828		4578	99.96	0.15	TRUE
562.2245	87	87	47	35	29	21	5023971	5023971	4917953	4833178	4734580	4472743	87	572994	5023971	50.36	201995	130658	8	15	0		87	5023971	50.36	5006		4725	99.96	0.08	TRUE
562.22451	63	63	44	40	33	23	5090818	5090818	5049778	5019455	4899062	4562911	63	519707	5090818	50.47	189331	129149	8	16	0		63	5090818	50.47	5094		4805	99.96	0.62	TRUE
562.22452	182	182	113	97	61	31	5251925	5251925	5081326	4972709	4411301	3305310	182	256835	5251925	50.41	76183	34892	21	46	0		182	5251925	50.41	5341		5069	99.96	0.39	TRUE
562.22453	171	171	104	95	65	31	4934064	4934064	4763011	4695711	4208683	2974268	171	209462	4934064	50.41	69544	34324	23	48	0		171	4934064	50.41	4980		4732	99.96	0.54	TRUE
562.22454	94	94	55	47	35	26	5205138	5205138	5116450	5062087	4858180	4548293	94	482510	5205138	50.67	186372	104079	9	18	0		94	5205138	50.67	5274		4984	99.96	0.62	TRUE
562.22455	102	102	62	52	38	30	5105361	5105361	5013945	4945411	4697181	4399590	102	309604	5105361	50.75	159845	106261	13	22	0		102	5105361	50.75	5124		4862	99.96	0.08	TRUE
562.22457	109	109	68	53	37	25	5189662	5189662	5094881	4990981	4696193	4263462	109	441772	5189662	50.49	179577	90612	10	21	0		109	5189662	50.49	5166		4900	99.96	0.85	TRUE
562.22458	105	105	66	60	45	27	4987674	4987674	4906267	4858900	4607153	3936513	105	399394	4987674	50.54	131990	70871	12	24	0		105	4987674	50.54	4972		4693	99.96	0.39	TRUE
562.22459	174	174	123	106	67	28	4562365	4562365	4443998	4313945	3666247	2302843	174	148789	4562365	51.05	50623	28528	28	58	0		174	4562365	51.05	4585		4403	99.1	0.46	TRUE
562.2246	124	124	86	77	52	29	4957680	4957680	4871330	4808091	4377631	3516963	124	304805	4957680	50.55	107272	43588	15	34	0		124	4957680	50.55	4980		4727	99.96	0.11	TRUE
562.22461	127	127	88	74	50	31	5314190	5314190	5229658	5129667	4730434	4010826	127	395997	5314190	50.73	134216	52619	13	31	0		127	5314190	50.73	5353		5072	99.96	0.13	TRUE
562.22462	72	72	50	46	39	23	4782754	4782754	4733147	4701681	4593396	4024382	72	451992	4782754	50.6	184094	130846	11	18	0		72	4782754	50.6	4712		4486	99.96	0.08	TRUE
562.22463	45	45	37	31	28	21	4853502	4853502	4839766	4796971	4751762	4496106	45	927242	4853502	50.58	242521	153794	6	12	0		45	4853502	50.58	4719		4496	99.96	0.45	TRUE
562.22464	147	147	81	69	49	31	5250453	5250453	5101564	5022529	4683644	4024158	147	341844	5250453	50.52	119418	50672	13	30	0		147	5250453	50.52	5242		4990	99.96	0.08	TRUE
562.22465	89	89	63	56	36	27	5095825	5095825	5028318	4976917	4649872	4319869	89	352371	5095825	50.76	160044	96478	12	21	0		89	5095825	50.76	5114		4847	99.96	0.08	TRUE
562.22466	137	137	81	68	50	30	5241758	5241758	5114873	5018345	4721537	4005151	137	443069	5241758	50.66	132424	62919	14	29	0		137	5241758	50.66	5222		4934	99.96	0.13	TRUE
562.22467	105	105	62	47	35	26	5152760	5152760	5062199	4955365	4786120	4486799	105	430126	5152760	50.25	191549	101816	9	19	0		105	5152760	50.25	5153		4843	99.96	0.08	TRUE
562.22468	103	103	52	44	35	27	5033197	5033197	4914502	4858844	4740256	4443322	103	434358	5033197	50.53	185952	94828	9	18	0		103	5033197	50.53	5012		4733	99.96	0.08	TRUE
562.22469	121	121	82	66	49	30	5029844	5029844	4941415	4826243	4550665	3861055	121	266670	5029844	50.52	113103	66694	14	29	0		121	5029844	50.52	4993		4713	99.65	0.08	TRUE
562.2247	53	53	36	35	32	23	4780462	4780462	4741428	4732598	4689437	4393303	53	522559	4780462	50.69	196518	150036	8	15	0		53	4780462	50.69	4708		4507	99.96	0.39	TRUE
562.22471	176	176	85	68	50	33	5362352	5362352	5164020	5052352	4756528	4162222	176	333316	5362352	50.5	124607	54998	14	31	0		176	5362352	50.5	5413		5133	99.9	0.13	TRUE
562.22472	122	122	81	64	48	30	5030313	5030313	4943325	4816948	4556631	3907082	122	266670	5030313	50.52	113103	68996	14	28	0		122	5030313	50.52	4994		4716	99.65	0.08	TRUE
562.22473	76	76	47	41	36	28	4801061	4801061	4741252	4698267	4613848	4344535	76	348877	4801061	50.63	175934	98049	11	19	0		76	4801061	50.63	4638		4441	99.96	0.13	TRUE
562.22474	111	111	51	43	33	28	5010329	5010329	4871344	4820083	4649946	4465670	111	431661	5010329	50.59	174145	105048	10	19	0		111	5010329	50.59	4947		4677	99.96	0.08	TRUE
562.22476	114	114	86	71	52	31	4865874	4865874	4796969	4680402	4365248	3631899	114	224366	4865874	50.63	111973	49431	16	32	0		114	4865874	50.63	4806		4590	99.96	0.08	TRUE
562.22477	62	62	37	35	31	24	4976263	4976263	4920026	4906217	4846018	4584016	62	440173	4976263	50.54	185290	151982	9	16	0		62	4976263	50.54	4908		4631	98.73	0.45	TRUE
562.22478	75	75	55	45	34	26	5027033	5027033	4978959	4904577	4710095	4412815	75	433455	5027033	50.79	180424	112493	11	19	0		75	5027033	50.79	5005		4744	99.96	0.13	TRUE
562.22479	226	226	70	53	36	28	5441885	5441885	5171541	5066120	4792650	4483235	226	317596	5441885	50.58	173802	92684	12	23	0		226	5441885	50.58	5567		5279	99.96	0.58	TRUE
562.2248	123	123	72	62	48	29	5086607	5086607	4970694	4898928	4677780	4014461	123	334903	5086607	50.65	145605	61173	12	26	0		123	5086607	50.65	5149		4861	99.96	0.39	TRUE
562.22481	113	113	67	57	40	26	5237253	5237253	5131292	5057304	4773489	4285889	113	359182	5237253	50.46	163568	92569	10	21	0		113	5237253	50.46	5224		4956	99.96	0.85	TRUE
562.22482	191	191	121	95	66	31	5087296	5087296	4915339	4733882	4268544	2976571	191	226183	5087296	50.55	58217	33957	24	52	0		191	5087296	50.55	5176		4903	99.34	0.67	TRUE
562.22483	103	103	66	52	34	27	5245777	5245777	5171911	5081780	4786467	4515291	103	405530	5245777	50.67	180474	109258	11	21	0		103	5245777	50.67	5281		5015	99.96	0.58	TRUE
562.22484	129	129	89	69	48	29	5194666	5194666	5102487	4970830	4604570	3903839	129	268403	5194666	50.66	146464	60798	14	29	0		129	5194666	50.66	5156		4887	99.96	0.13	TRUE
562.22485	156	156	94	74	57	36	5381197	5381197	5240915	5099884	4835396	4080524	156	395997	5381197	50.57	94771	53634	17	36	0		156	5381197	50.57	5456		5161	99.96	0.17	TRUE
562.22486	48	48	36	34	30	22	4882983	4882983	4854449	4839982	4759692	4485757	48	565915	4882983	50.58	207021	139014	7	13	0		48	4882983	50.58	4682		4485	99.96	0.08	TRUE
562.22487	41	41	34	33	31	23	4890083	4890083	4871769	4864192	4829750	4558781	41	882586	4890083	50.44	299368	114153	6	11	0.02		41	4890083	50.44	4821		4607	99.96	0.08	TRUE
562.22488	107	107	62	55	32	24	5214694	5214694	5119362	5065894	4692219	4403149	107	424708	5214694	50.73	182006	109366	10	19	0		107	5214694	50.73	5250		4968	99.96	0.31	TRUE
562.22489	102	102	58	45	33	24	5133772	5133772	5027605	4939306	4752887	4448181	102	431564	5133772	50.56	202448	114521	9	17	0		102	5133772	50.56	5139		4830	99.96	0.13	TRUE
562.2249	73	73	51	42	33	20	5108192	5108192	5057468	4999017	4855416	4345256	73	577056	5108192	50.56	223566	121554	7	15	0		73	5108192	50.56	5161		4863	99.96	0.97	TRUE
562.22491	125	125	68	58	37	30	5108779	5108779	4988314	4920344	4547742	4284764	125	308610	5108779	50.81	159114	87086	13	24	0		125	5108779	50.81	5092		4832	99.96	0.11	TRUE
562.22492	96	96	61	47	33	25	5005827	5005827	4920112	4821781	4576019	4314152	96	461008	5005827	50.5	169141	113115	10	19	0		96	5005827	50.5	4929		4667	99.96	0.08	TRUE
562.22493	44	44	31	29	27	17	4736874	4736874	4702806	4690358	4658211	4313619	44	595714	4736874	50.49	252744	187831	6	12	0		44	4736874	50.49	4624		4421	99.96	0.08	TRUE
562.22494	102	102	63	51	38	25	5064009	5064009	4978128	4890467	4708391	4256398	102	404619	5064009	50.47	175921	101977	9	19	0		102	5064009	50.47	5081		4810	99.96	0.62	TRUE
562.22495	209	209	102	81	55	31	5399247	5399247	5174987	5016702	4623221	3725517	209	318226	5399247	50.67	117051	42931	17	38	0		209	5399247	50.67	5673		5336	100	0.23	TRUE
562.22496	215	215	106	84	61	38	5608365	5608365	5376957	5219467	4847236	4023300	215	302248	5608365	50.4	91562	44416	21	42	0		215	5608365	50.4	5767		5402	99.88	0.69	TRUE
562.22497	112	112	68	54	40	30	5111715	5111715	5008221	4911769	4685048	4328571	112	402107	5111715	50.54	140197	84589	11	22	0		112	5111715	50.54	5086		4786	99.96	0.08	TRUE
562.22498	123	123	92	77	54	28	4509134	4509134	4440760	4326050	3912124	2923904	123	299391	4509134	50.76	79519	40253	18	39	0		123	4509134	50.76	4497		4277	99.96	0.39	TRUE
562.22499	104	104	62	49	34	28	5038357	5038357	4936459	4844537	4606860	4370637	104	433466	5038357	50.73	173229	106033	12	21	0		104	5038357	50.73	5029		4775	99.96	0.08	TRUE
562.225	107	107	63	51	37	23	5108031	5108031	5005582	4913747	4696433	4226910	107	525736	5108031	50.45	185580	94850	9	18	0		107	5108031	50.45	5063		4783	99.96	0.08	TRUE
562.22501	166	166	89	70	49	27	5150589	5150589	4977216	4832252	4492487	3729783	166	398750	5150589	50.63	130837	42500	12	31	0		166	5150589	50.63	5234		4924	99.96	0.39	TRUE
562.22502	71	71	45	39	30	22	4969417	4969417	4904665	4859607	4715565	4424272	71	503332	4969417	50.46	221365	128186	8	15	0		71	4969417	50.46	4851		4605	99.96	0.08	TRUE
562.22503	109	109	71	59	41	28	5161857	5161857	5079794	4998751	4675558	4221245	109	348400	5161857	50.42	164660	86264	11	23	0		109	5161857	50.42	5136		4893	99.96	0.58	TRUE
562.22504	92	92	56	47	33	23	4975911	4975911	4889284	4823134	4615194	4259923	92	526766	4975911	50.49	185841	104935	8	17	0		92	4975911	50.49	4868		4619	99.96	0.08	TRUE
562.22505	49	49	38	36	28	23	4958917	4958917	4934702	4917335	4788920	4613642	49	941311	4958917	50.53	202447	128186	7	14	0		49	4958917	50.53	4841		4607	99.96	0.39	TRUE
562.22506	79	79	44	37	31	25	4973341	4973341	4887641	4839418	4753072	4552547	79	526857	4973341	50.57	193192	115182	8	16	0.02		79	4973341	50.57	4883		4620	99.96	0.08	TRUE
562.22507	156	156	96	82	58	37	5273742	5273742	5125323	5033401	4658647	3867810	156	349462	5273742	50.52	75542	49549	17	39	0		156	5273742	50.52	5316		5057	99.96	0.08	TRUE
562.22508	152	152	95	76	53	31	5174593	5174593	5036656	4908499	4522006	3737475	152	276442	5174593	50.7	119309	44864	16	35	0		152	5174593	50.7	5140		4876	99.96	0.13	TRUE
562.22509	96	96	49	42	32	23	5101140	5101140	4995472	4943175	4800473	4490422	96	519708	5101140	50.51	189254	121068	8	16	0		96	5101140	50.51	5163		4880	99.96	0.67	TRUE
562.2251	111	111	69	55	41	26	5218839	5218839	5111735	5004963	4778822	4258845	111	371069	5218839	50.46	175045	70516	10	21	0		111	5218839	50.46	5265		4953	99.65	0.08	TRUE
562.22511	93	93	58	51	43	31	4958824	4958824	4874025	4825953	4705728	4244422	93	349213	4958824	50.69	147443	75970	12	24	0		93	4958824	50.69	4927		4684	99.96	0.08	TRUE
562.22512	109	109	66	54	43	30	5182151	5182151	5078858	4990220	4807152	4320446	109	375719	5182151	50.61	144839	76539	11	23	0		109	5182151	50.61	5227		4938	99.96	0.31	TRUE
562.22513	108	108	56	46	38	27	5061046	5061046	4953556	4883049	4766199	4368019	108	430109	5061046	50.3	166969	101648	10	19	0		108	5061046	50.3	5029		4759	99.96	0.08	TRUE
562.22514	86	86	52	44	36	29	5179356	5179356	5118306	5063464	4940935	4669614	86	478182	5179356	50.38	177730	109375	10	20	0		86	5179356	50.38	5198		4913	99.96	0.62	TRUE
562.22515	142	142	81	64	44	31	5137538	5137538	4995311	4876894	4558119	4101677	142	351832	5137538	50.63	129092	66851	14	27	0		142	5137538	50.63	5127		4853	99.96	0.13	TRUE
562.22516	154	154	101	78	53	26	5114612	5114612	4986046	4823756	4411476	3405765	154	283702	5114612	50.67	106895	40722	15	36	0		154	5114612	50.67	5070		4810	99.96	0.13	TRUE
562.22517	109	109	68	56	39	29	5108477	5108477	5010573	4929731	4634862	4269928	109	329383	5108477	50.55	160690	89226	12	23	0		109	5108477	50.55	5130		4837	99.65	0.08	TRUE
562.22518	116	116	67	54	38	29	5075418	5075418	4980464	4883005	4631944	4321990	116	325374	5075418	50.8	165297	93290	12	23	0		116	5075418	50.8	5050		4796	99.96	0.11	TRUE
562.22519	100	100	58	48	32	24	5111302	5111302	5006551	4940653	4673705	4401485	100	505066	5111302	50.44	182538	105026	9	18	0		100	5111302	50.44	5062		4791	99.96	0.23	TRUE
562.2252	203	203	92	71	48	36	5257206	5257206	4994654	4844959	4439778	4025326	203	351627	5257206	50.5	104287	51647	16	35	0		203	5257206	50.5	5343		5051	99.88	0.31	TRUE
562.22521	97	97	51	44	40	30	4928110	4928110	4823400	4767434	4703836	4344533	97	529086	4928110	50.55	140232	90905	10	20	0		97	4928110	50.55	4829		4596	99.96	0.16	TRUE
562.22522	37	37	28	28	28	20	4715562	4715562	4696765	4696765	4696765	4433268	37	514180	4715562	50.8	278352	156789	7	13	0		37	4715562	50.8	4616		4427	99.96	0.08	TRUE
562.22523	121	121	66	52	34	26	5107307	5107307	4979484	4877173	4602539	4329628	121	440443	5107307	50.49	174017	94816	10	20	0		121	5107307	50.49	5076		4793	99.96	0.08	TRUE
562.22524	111	111	66	57	47	29	5132351	5132351	5028406	4967378	4815525	4180963	111	289447	5132351	50.52	172833	73012	12	24	0		111	5132351	50.52	5173		4911	99.96	0.08	TRUE
562.22525	109	109	65	51	36	24	5124808	5124808	5022363	4917747	4677791	4282961	109	525686	5124808	50.45	179250	109837	10	19	0		109	5124808	50.45	5088		4800	99.96	0.08	TRUE
562.22526	72	72	51	44	32	25	4993788	4993788	4953085	4906253	4707944	4452154	72	493407	4993788	50.57	196354	105495	8	17	0		72	4993788	50.57	4945		4689	99.96	0.08	TRUE
562.22527	97	97	58	52	42	28	5105985	5105985	5019999	4981664	4814606	4329788	97	451302	5105985	50.59	166690	76680	10	21	0		97	5105985	50.59	5021		4755	99.96	0.13	TRUE
562.22528	108	108	66	52	36	23	5120904	5120904	5023138	4916761	4676030	4236472	108	525736	5120904	50.45	182538	104914	10	19	0		108	5120904	50.45	5080		4790	99.96	0.08	TRUE
562.22529	118	118	79	67	51	32	5131819	5131819	5049317	4970071	4684941	3994286	118	366831	5131819	50.68	125156	53231	13	30	0		118	5131819	50.68	5074		4772	99.96	0.23	TRUE
562.2253	105	105	66	54	37	24	5116806	5116806	5032379	4946577	4686501	4233555	105	523127	5116806	50.44	182511	104950	10	19	0		105	5116806	50.44	5084		4796	99.96	0.08	TRUE
562.22531	98	98	60	53	44	28	4901909	4901909	4818111	4768161	4591441	3996053	98	356869	4901909	50.75	148743	65170	12	23	0		98	4901909	50.75	4849		4616	99.96	0.08	TRUE
562.22532	111	111	55	44	34	25	5079577	5079577	4952889	4874557	4720984	4421226	111	466211	5079577	50.63	189581	111669	10	18	0		111	5079577	50.63	5111		4857	99.96	0.45	TRUE
562.22533	98	98	58	51	37	26	5128156	5128156	5040652	4989570	4760195	4373093	98	493425	5128156	50.41	174726	98548	9	20	0		98	5128156	50.41	5139		4821	99.96	0.12	TRUE
562.22534	115	115	73	61	46	28	5189257	5189257	5083067	4991927	4755052	4109326	115	370593	5189257	50.52	143296	56557	11	25	0		115	5189257	50.52	5246		4957	99.96	0.31	TRUE
562.22535	95	95	55	47	38	25	5142916	5142916	5054689	4999084	4831266	4365683	95	444004	5142916	50.38	189802	111788	10	19	0		95	5142916	50.38	5137		4840	99.96	0.08	TRUE
562.22536	109	109	67	52	35	28	5250393	5250393	5166164	5070790	4804295	4532868	109	319257	5250393	50.66	173802	109221	12	21	0		109	5250393	50.66	5294		5022	99.96	0.58	TRUE
562.22537	78	78	50	41	31	23	4930366	4930366	4861225	4795209	4630347	4337339	78	561216	4930366	50.5	186509	113115	8	16	0		78	4930366	50.5	4847		4571	99.96	0.08	TRUE
562.22538	89	89	56	45	33	23	5021427	5021427	4943928	4870000	4679358	4349588	89	476991	5021427	50.67	172718	114762	9	17	0		89	5021427	50.67	4977		4724	99.96	0.08	TRUE
562.22539	111	111	63	54	37	29	5114009	5114009	5002639	4939766	4633379	4325202	111	329798	5114009	50.81	159842	96478	13	23	0		111	5114009	50.81	5093		4830	99.96	0.11	TRUE
562.2254	78	78	54	46	35	26	5073068	5073068	5015398	4960620	4787919	4471453	78	397093	5073068	50.59	186497	105217	10	19	0		78	5073068	50.59	5009		4761	99.88	0.08	TRUE
562.22541	123	123	68	53	37	28	5073836	5073836	4964652	4856845	4605093	4280497	123	325604	5073836	50.8	173037	96094	12	22	0		123	5073836	50.8	5050		4795	99.96	0.11	TRUE
562.22542	103	103	64	57	43	27	4809677	4809677	4703440	4652146	4392381	3822342	103	313650	4809677	50.44	150536	66087	11	24	0.02		103	4809677	50.44	4835		4590	99.96	0.13	TRUE
562.22543	95	95	66	54	34	24	4961986	4961986	4889106	4800779	4477867	4120271	95	452210	4961986	50.67	180463	101437	10	19	0		95	4961986	50.67	4918		4640	99.96	0.11	TRUE
562.22544	126	126	73	63	47	28	5229594	5229594	5099950	5026226	4744003	4034893	126	396009	5229594	50.66	162654	62812	12	26	0		126	5229594	50.66	5165		4906	99.86	0.23	TRUE
562.22545	99	99	65	55	34	26	5106203	5106203	5027210	4957473	4616555	4346076	99	504738	5106203	50.43	179396	98725	10	20	0		99	5106203	50.43	5058		4766	99.96	0.08	TRUE
562.22546	154	154	94	70	55	32	5402071	5402071	5261899	5096966	4832108	3994056	154	351731	5402071	50.49	110776	47097	16	34	0		154	5402071	50.49	5494		5198	99.96	0.13	TRUE
562.22547	125	125	66	55	41	30	5116933	5116933	4987809	4918957	4697315	4307781	125	371826	5116933	50.78	155729	74193	11	23	0		125	5116933	50.78	5152		4881	99.96	0.13	TRUE
562.22548	167	167	98	72	54	35	5361154	5361154	5199002	5019719	4753372	4094128	167	240731	5361154	50.59	116814	50639	17	34	0		167	5361154	50.59	5474		5182	99.96	0.13	TRUE
562.22549	190	190	119	91	62	30	4989285	4989285	4805546	4597229	4104720	2944300	190	243291	4989285	50.58	58217	33957	22	50	0		190	4989285	50.58	5034		4779	99.55	0.31	TRUE
562.2255	78	78	50	44	36	25	5157055	5157055	5095670	5053485	4927702	4540668	78	519977	5157055	50.52	180004	113147	9	17	0		78	5157055	50.52	5186		4897	99.96	0.62	TRUE
562.22551	92	92	57	51	36	26	5113868	5113868	5036992	4992985	4748855	4373472	92	433343	5113868	50.77	178792	109366	11	20	0		92	5113868	50.77	5133		4872	99.96	0.08	TRUE
562.22552	99	99	63	51	37	26	4986086	4986086	4900050	4812262	4586857	4205784	99	357214	4986086	50.45	174352	102308	10	20	0		99	4986086	50.45	4943		4662	99.96	0.08	TRUE
562.22553	80	80	49	43	34	24	5082765	5082765	5011327	4973062	4829746	4478399	80	514566	5082765	50.37	191125	109097	8	16	0		80	5082765	50.37	5040		4752	99.96	0.08	TRUE
562.22554	96	96	57	52	45	32	4880152	4880152	4789173	4751068	4630908	4152550	96	455620	4880152	50.78	128699	65334	11	24	0		96	4880152	50.78	4816		4563	99.96	0.08	TRUE
562.22555	80	80	59	48	38	30	5124588	5124588	5071676	4996218	4834778	4543989	80	308622	5124588	50.65	174423	107223	12	21	0		80	5124588	50.65	5112		4846	99.96	0.08	TRUE
562.22556	53	53	41	38	34	26	4825523	4825523	4803733	4782512	4703403	4402706	53	506387	4825523	50.56	202871	120255	9	17	0		53	4825523	50.56	4666		4461	99.96	0.3	TRUE
562.22557	74	74	47	41	35	25	5071380	5071380	5012327	4973063	4889276	4535644	74	519710	5071380	50.59	189510	121028	8	16	0		74	5071380	50.59	5047		4778	99.96	0.62	TRUE
562.22558	96	96	57	45	36	22	5091008	5091008	4994678	4910532	4777025	4285693	96	482305	5091008	50.59	192225	113179	8	16	0		96	5091008	50.59	5151		4838	99.96	0.62	TRUE
562.22559	109	109	65	56	39	27	5188414	5188414	5085659	5020937	4782685	4356592	109	430497	5188414	50.53	173947	70399	9	20	0		109	5188414	50.53	5295		4968	99.88	0.62	TRUE
562.2256	79	79	52	43	29	23	4918656	4918656	4850785	4784806	4573524	4369148	79	564782	4918656	50.49	202448	105117	8	16	0		79	4918656	50.49	4808		4546	99.81	0.08	TRUE
562.22561	129	129	71	55	35	26	5102388	5102388	4971880	4863780	4537933	4201873	129	422462	5102388	50.76	166801	96379	12	22	0		129	5102388	50.76	5150		4893	99.86	0.08	TRUE
562.22562	168	168	90	74	50	33	5211453	5211453	5017011	4908552	4499542	3870266	168	379524	5211453	50.61	94738	49891	15	34	0		168	5211453	50.61	5162		4909	99.96	0.08	TRUE
562.22563	120	120	63	50	37	27	5172171	5172171	5053076	4958458	4742684	4392014	120	562429	5172171	50.51	139682	97155	9	20	0		120	5172171	50.51	5207		4935	99.96	0.08	TRUE
562.22564	101	101	61	50	40	26	5018502	5018502	4930797	4856876	4680295	4204390	101	476788	5018502	50.63	172388	88573	10	21	0		101	5018502	50.63	4988		4752	99.96	0.39	TRUE
562.22565	88	88	59	51	36	27	5095403	5095403	5022531	4964984	4723718	4386398	88	346368	5095403	50.8	174244	106249	12	21	0		88	5095403	50.8	5093		4821	99.96	0.08	TRUE
562.22566	115	115	65	49	38	23	5299677	5299677	5186107	5072216	4892287	4320657	115	449534	5299677	50.57	172655	88098	9	18	0		115	5299677	50.57	5372		5074	99.96	0.62	TRUE
562.22567	151	151	92	75	53	36	4996714	4996714	4875535	4756342	4389852	3783004	151	249890	4996714	50.65	96361	50833	17	36	0		151	4996714	50.65	5000		4746	99.96	0.08	TRUE
562.22568	88	88	53	42	35	27	5072339	5072339	5000354	4925208	4826719	4540362	88	413844	5072339	50.57	202447	106853	8	17	0		88	5072339	50.57	5061		4776	99.96	0.08	TRUE
562.22569	80	80	59	49	38	26	5005505	5005505	4963045	4897774	4721351	4281563	80	427724	5005505	50.52	175503	98548	9	19	0		80	5005505	50.52	4952		4688	99.96	0.08	TRUE
562.2257	129	129	58	45	32	25	5104427	5104427	4957532	4870478	4671218	4434750	129	402006	5104427	50.45	192774	114387	11	18	0		129	5104427	50.45	5142		4869	99.96	0.08	TRUE
562.22571	102	102	51	44	34	24	5065823	5065823	4959003	4912045	4769407	4418488	102	430127	5065823	50.34	203755	112904	8	16	0		102	5065823	50.34	5020		4765	99.96	0.08	TRUE
562.22572	89	89	49	45	34	25	5037268	5037268	4944209	4911360	4722606	4419114	89	365610	5037268	50.51	186575	105004	9	18	0		89	5037268	50.51	5026		4745	99.96	0.08	TRUE
562.22573	61	61	42	37	32	22	5037222	5037222	4994547	4960436	4882802	4529609	61	519978	5037222	50.53	203770	130915	7	15	0		61	5037222	50.53	5026		4758	99.96	0.62	TRUE
562.22574	131	131	74	57	40	28	5149400	5149400	5016667	4892002	4624320	4233876	131	402125	5149400	50.31	140195	74884	11	23	0		131	5149400	50.31	5154		4845	99.96	0.13	TRUE
562.22576	80	80	53	41	34	26	5206836	5206836	5144877	5050193	4930214	4648087	80	539567	5206836	50.52	181584	114902	8	17	0		80	5206836	50.52	5232		4963	99.96	0.08	TRUE
562.22577	101	101	64	51	33	24	5124316	5124316	5039758	4943825	4644802	4324416	101	493424	5124316	50.46	196399	99335	8	18	0		101	5124316	50.46	5160		4876	99.96	0.08	TRUE
562.22578	166	166	107	86	54	30	5218516	5218516	5079623	4940957	4400756	3476966	166	343486	5218516	50.42	105614	41207	19	40	0		166	5218516	50.42	5266		4996	99.96	0.12	TRUE
562.22579	100	100	63	50	36	27	5042887	5042887	4952243	4862172	4614912	4280314	100	402009	5042887	50.42	179149	91594	10	20	0		100	5042887	50.42	5036		4762	99.96	0.08	TRUE
562.2258	45	45	36	34	31	23	5031288	5031288	5008371	4994702	4936358	4668229	45	918589	5031288	50.37	273500	158585	6	13	0		45	5031288	50.37	5012		4771	99.96	0.28	TRUE
562.22581	135	135	73	56	40	25	5181893	5181893	5022755	4904632	4672873	4175401	135	537615	5181893	50.41	154374	94850	11	21	0		135	5181893	50.41	5183		4879	99.96	0.08	TRUE
562.22582	95	95	65	55	37	26	5037737	5037737	4960606	4890117	4587812	4192536	95	397157	5037737	50.77	169457	106261	12	21	0		95	5037737	50.77	5023		4769	99.96	0.08	TRUE
562.22583	91	91	58	51	43	27	5096060	5096060	5020941	4978893	4850251	4300416	91	451301	5096060	50.6	158185	80698	11	21	0		91	5096060	50.6	5032		4746	99.96	0.13	TRUE
562.22584	129	129	69	51	37	26	5097737	5097737	4966593	4855920	4652193	4293061	129	460107	5097737	50.44	174379	104188	10	20	0		129	5097737	50.44	5106		4815	99.96	0.13	TRUE
562.22585	93	93	54	44	37	25	4927590	4927590	4834154	4761832	4668687	4259045	93	404739	4927590	50.57	173655	112826	10	18	0		93	4927590	50.57	4940		4676	99.96	0.62	TRUE
562.22586	92	92	61	51	46	32	5048137	5048137	4982897	4911154	4822642	4342012	92	368793	5048137	50.69	134250	76222	12	24	0		92	5048137	50.69	4950		4691	99.96	0.39	TRUE
562.22587	118	118	71	61	42	26	5135964	5135964	5024749	4961444	4701708	4135441	118	538365	5135964	50.4	148535	94818	11	22	0		118	5135964	50.4	5143		4835	99.81	0.08	TRUE
562.22588	109	109	66	55	35	28	5123925	5123925	5029164	4952549	4624538	4370850	109	325604	5123925	50.79	165175	102771	12	22	0		109	5123925	50.79	5128		4852	99.96	0.11	TRUE
562.22589	57	57	34	30	27	19	4871297	4871297	4812109	4783260	4735894	4446313	57	716434	4871297	50.55	266790	160077	6	12	0		57	4871297	50.55	4807		4589	99.96	0.39	TRUE
562.2259	53	53	35	31	29	18	4829911	4829911	4782412	4752559	4727458	4332139	53	527837	4829911	50.47	237597	189589	7	13	0		53	4829911	50.47	4724		4502	99.88	0.08	TRUE
562.22591	70	70	47	44	38	28	4587932	4587932	4542351	4519262	4409327	4061232	70	305178	4587932	50.77	167534	89917	11	20	0		70	4587932	50.77	4475		4287	99.96	0.08	TRUE
562.22592	91	91	57	44	31	22	5002519	5002519	4921207	4824948	4628957	4327651	91	703167	5002519	50.52	202475	113091	8	16	0		91	5002519	50.52	4920		4656	99.96	0.08	TRUE
562.22593	123	123	59	52	36	27	5153842	5153842	5019406	4969219	4717969	4402184	123	430168	5153842	50.24	162927	95363	9	19	0		123	5153842	50.24	5167		4883	99.96	0.08	TRUE
562.22594	110	110	71	58	39	26	5158835	5158835	5073628	4980961	4681686	4257891	110	390506	5158835	50.47	173819	84597	11	21	0		110	5158835	50.47	5144		4850	99.96	0.08	TRUE
562.22595	131	131	71	56	36	28	5162522	5162522	5023093	4916274	4587709	4303134	131	313119	5162522	50.74	159114	103881	13	23	0		131	5162522	50.74	5194		4911	99.96	0.11	TRUE
562.22596	110	110	69	57	38	29	5087917	5087917	4986922	4904384	4588567	4252916	110	408751	5087917	50.74	142889	96478	13	23	0		110	5087917	50.74	5094		4837	99.96	0.08	TRUE
562.22597	117	117	66	57	38	26	5135966	5135966	5015179	4956643	4653263	4213770	117	391944	5135966	50.63	178677	77657	11	21	0		117	5135966	50.63	5172		4901	99.96	0.13	TRUE
562.22598	58	58	38	37	33	25	4852109	4852109	4814810	4806837	4736568	4451930	58	437563	4852109	50.51	220601	129340	9	16	0		58	4852109	50.51	4778		4557	99.96	0.08	TRUE
562.22599	43	43	35	32	28	20	4846678	4846678	4826853	4810306	4750278	4457251	43	561219	4846678	50.5	241995	187637	7	13	0		43	4846678	50.5	4739		4499	99.96	0.08	TRUE
562.226	91	91	58	48	37	23	4883485	4883485	4818079	4747353	4567073	4026273	91	425477	4883485	50.75	184055	89668	9	18	0		91	4883485	50.75	4846		4601	99.96	0.08	TRUE
562.22601	105	105	66	53	36	29	5236640	5236640	5154991	5068095	4793012	4521501	105	424689	5236640	50.69	159104	106261	12	22	0		105	5236640	50.69	5286		5010	99.96	0.58	TRUE
562.22602	137	137	85	63	49	32	5180945	5180945	5051341	4902823	4661226	4094968	137	390850	5180945	50.61	129615	61246	14	29	0		137	5180945	50.61	5164		4891	99.96	0.13	TRUE
562.22603	110	110	66	51	32	26	5039963	5039963	4935880	4836740	4501564	4291431	110	402019	5039963	50.46	174234	96400	10	20	0		110	5039963	50.46	5005		4730	99.96	0.08	TRUE
562.22604	87	87	57	51	39	26	5126601	5126601	5063779	5025009	4856011	4407501	87	486933	5126601	50.52	175991	91079	8	18	0		87	5126601	50.52	5175		4887	99.96	0.62	TRUE
562.22605	91	91	52	41	34	27	5281385	5281385	5191717	5107979	4992654	4737307	91	511097	5281385	50.27	200408	105352	9	17	0		91	5281385	50.27	5328		5020	99.96	0.64	TRUE
562.22606	76	76	45	39	31	23	4941266	4941266	4863573	4821188	4693295	4421354	76	525736	4941266	50.56	203809	117478	8	15	0		76	4941266	50.56	4850		4586	99.96	0.39	TRUE
562.22607	122	122	80	66	42	29	5021939	5021939	4933133	4830420	4422558	3938537	122	322214	5021939	50.73	131784	55705	12	26	0		122	5021939	50.73	5024		4759	99.96	0.39	TRUE
562.22608	82	82	53	46	39	29	4795003	4795003	4723590	4677378	4559817	4188987	82	395843	4795003	50.68	164496	92168	11	21	0		82	4795003	50.68	4707		4502	99.96	0.12	TRUE
562.22609	96	96	54	46	34	23	5002802	5002802	4907895	4848545	4687139	4310263	96	530804	5002802	50.44	185841	113091	9	17	0		96	5002802	50.44	4930		4657	99.96	0.08	TRUE
562.2261	117	117	66	53	33	27	5133907	5133907	5014661	4919010	4602055	4395266	117	325377	5133907	50.77	180448	106034	11	20	0		117	5133907	50.77	5140		4865	99.96	0.11	TRUE
562.22611	117	117	67	55	36	28	5135024	5135024	5015923	4927585	4630764	4351071	117	308610	5135024	50.77	178678	96379	12	22	0		117	5135024	50.77	5142		4864	99.96	0.11	TRUE
562.22612	97	97	62	52	33	21	4905127	4905127	4825383	4750213	4403105	3981639	97	452210	4905127	50.69	186348	109239	10	18	0		97	4905127	50.69	4810		4556	99.96	0.11	TRUE
562.22613	111	111	60	46	35	25	5144662	5144662	5029137	4921258	4742552	4423109	111	359076	5144662	50.38	182538	113009	10	19	0		111	5144662	50.38	5177		4864	99.96	0.08	TRUE
562.22614	71	71	51	46	41	26	4682346	4682346	4639309	4604761	4520738	3974838	71	336163	4682346	50.67	182962	84805	11	20	0		71	4682346	50.67	4588		4372	99.96	0.08	TRUE
562.22615	104	104	59	48	32	23	5063549	5063549	4961811	4889171	4631949	4292789	104	505095	5063549	50.44	186575	102405	9	17	0		104	5063549	50.44	5003		4734	99.96	0.13	TRUE
562.22617	96	96	68	50	38	23	5071440	5071440	5007444	4882386	4687370	4178165	96	476607	5071440	50.65	172606	87912	9	19	0		96	5071440	50.65	5050		4802	99.96	0.39	TRUE
562.22618	76	76	57	49	35	27	4988640	4988640	4938492	4885561	4635357	4362851	76	477129	4988640	50.45	159223	93359	9	20	0		76	4988640	50.45	4859		4649	99.96	0.45	TRUE
562.22619	121	121	84	62	45	31	5184605	5184605	5089766	4926861	4634784	4142550	121	457738	5184605	50.63	132488	65305	13	27	0		121	5184605	50.63	5151		4881	99.96	0.13	TRUE
562.2262	124	124	66	53	36	26	5206143	5206143	5082170	4995606	4730353	4363813	124	424695	5206143	50.68	174417	109366	11	20	0		124	5206143	50.68	5282		5004	99.96	0.08	TRUE
562.22621	63	63	42	38	29	23	4889111	4889111	4834755	4807370	4665998	4441188	63	475629	4889111	50.6	202447	128187	8	16	0		63	4889111	50.6	4757		4523	99.96	0.08	TRUE
562.22622	86	86	54	46	33	26	5137248	5137248	5075840	5018339	4789033	4516879	86	424788	5137248	50.64	181680	111955	10	19	0		86	5137248	50.64	5141		4887	99.96	0.58	TRUE
562.22623	94	94	56	47	32	23	4973385	4973385	4884666	4818732	4592409	4284802	94	526766	4973385	50.49	186519	113091	9	18	0		94	4973385	50.49	4870		4618	99.96	0.08	TRUE
562.22624	112	112	69	55	36	24	5118430	5118430	5019948	4914447	4607310	4199735	112	525736	5118430	50.43	179357	94840	10	20	0		112	5118430	50.43	5084		4787	99.96	0.08	TRUE
562.22625	40	40	33	33	30	22	4825336	4825336	4807022	4807022	4761202	4489526	40	871354	4825336	50.53	264762	178640	6	11	0		40	4825336	50.53	4764		4551	99.96	0.08	TRUE
562.22626	103	103	65	56	43	29	5145325	5145325	5060293	4995794	4772363	4280734	103	322844	5145325	50.7	143076	90442	13	24	0		103	5145325	50.7	5179		4932	99.96	0.08	TRUE
562.22627	134	134	67	56	35	23	5088093	5088093	4940346	4864886	4535198	4105484	134	418973	5088093	50.48	174143	90280	10	20	0		134	5088093	50.48	5116		4836	99.96	0.08	TRUE
562.22628	157	157	103	79	60	31	4967553	4967553	4827294	4654256	4329839	3253738	157	296520	4967553	50.76	81888	40383	20	42	0		157	4967553	50.76	5034		4792	99.96	0.48	TRUE
562.22629	82	82	52	44	32	23	4989429	4989429	4923376	4863738	4655525	4348536	82	423587	4989429	50.49	185986	113170	9	17	0		82	4989429	50.49	4981		4711	99.96	0.68	TRUE
562.2263	138	138	82	66	46	31	5297969	5297969	5163301	5050820	4733535	4167137	138	325505	5297969	50.55	123836	68082	14	28	0.02		138	5297969	50.55	5417		5081	99.96	0.11	TRUE
562.22631	99	99	54	46	32	23	5017710	5017710	4928472	4872931	4644414	4312390	99	611447	5017710	50.69	181658	117783	10	18	0		99	5017710	50.69	5027		4773	99.96	0.08	TRUE
562.22632	139	139	67	50	38	25	5131280	5131280	4982979	4869277	4673319	4249674	139	442812	5131280	50.37	189323	77509	9	19	0		139	5131280	50.37	5242		4939	99.96	0.62	TRUE
562.22633	89	89	67	55	42	31	4759404	4759404	4711579	4622629	4411253	3980365	89	345624	4759404	50.48	128538	67090	13	25	0		89	4759404	50.48	4749		4528	99.65	0.08	TRUE
562.22634	77	77	49	41	31	23	4983799	4983799	4912315	4855240	4687258	4410835	77	464387	4983799	50.48	214005	114520	8	16	0		77	4983799	50.48	4885		4642	99.96	0.08	TRUE
562.22635	116	116	77	61	42	31	5103969	5103969	5007106	4892658	4574354	4169030	116	382540	5103969	50.64	114683	70866	13	26	0		116	5103969	50.64	5134		4855	99.96	0.08	TRUE
562.22636	111	111	70	56	45	29	5149079	5149079	5054720	4957843	4754592	4175915	111	427857	5149079	50.49	158050	68685	12	24	0		111	5149079	50.49	5107		4838	99.96	0.13	TRUE
562.22637	63	63	48	44	33	25	5118316	5118316	5082686	5056668	4879119	4595547	63	392041	5118316	50.56	208123	123812	10	17	0		63	5118316	50.56	5122		4860	99.96	0.08	TRUE
562.22638	105	105	62	48	35	22	5106546	5106546	5008447	4901113	4700876	4273784	105	525680	5106546	50.45	185463	113060	9	17	0		105	5106546	50.45	5076		4783	99.96	0.08	TRUE
562.22639	147	147	80	70	54	30	5192608	5192608	5044455	4969832	4693606	3855531	147	335216	5192608	50.59	113878	49698	14	31	0		147	5192608	50.59	5173		4899	99.96	0.08	TRUE
562.2264	150	150	77	63	49	34	4962419	4962419	4813473	4724861	4484471	3912823	150	240254	4962419	50.72	110404	60099	15	31	0		150	4962419	50.72	5002		4706	100	0.08	TRUE
562.22641	88	88	57	51	37	25	5104472	5104472	5034643	4995064	4775041	4362498	88	504675	5104472	50.44	179070	101812	9	19	0.02		88	5104472	50.44	5091		4794	99.96	0.12	TRUE
562.22642	142	142	64	55	39	31	5128917	5128917	4999330	4936451	4674126	4368950	142	293676	5128917	50.65	159492	87087	13	24	0		142	5128917	50.65	5179		4902	99.96	0.08	TRUE
562.22643	65	65	44	42	40	26	4784379	4784379	4740509	4724764	4684927	4181287	65	423654	4784379	50.66	187104	110595	10	18	0		65	4784379	50.66	4584		4378	99.96	0.08	TRUE
562.22644	111	111	67	49	37	27	5167760	5167760	5061632	4925638	4743780	4427581	111	355849	5167760	50.44	179415	113091	11	21	0		111	5167760	50.44	5185		4873	99.96	0.08	TRUE
562.22645	48	48	32	31	29	21	4725237	4725237	4681278	4675713	4654624	4354319	48	502372	4725237	50.62	249643	115317	7	13	0		48	4725237	50.62	4613		4427	99.96	0.08	TRUE
562.22646	98	98	65	50	35	25	4964627	4964627	4878527	4772278	4523165	4189271	98	362898	4964627	50.77	169883	106047	11	20	0		98	4964627	50.77	4952		4686	99.96	0.11	TRUE
562.22647	114	114	72	56	42	26	5123324	5123324	5021489	4912374	4686302	4158534	114	435553	5123324	50.48	154102	66761	10	21	0		114	5123324	50.48	5180		4885	99.96	0.39	TRUE
562.22648	82	82	46	41	34	25	5193470	5193470	5113569	5076675	4972725	4658880	82	539560	5193470	50.67	202706	121068	8	16	0		82	5193470	50.67	5269		4980	99.96	0.62	TRUE
562.22649	101	101	62	48	38	25	5015518	5015518	4925616	4825736	4687547	4227278	101	404618	5015518	50.52	185986	97247	9	19	0.02		101	5015518	50.52	5056		4763	99.96	0.62	TRUE
562.2265	110	110	68	55	35	28	5193080	5193080	5100929	5013856	4634909	4385041	110	319296	5193080	50.61	166923	106261	12	22	0		110	5193080	50.61	5272		4974	99.96	0.08	TRUE
562.22651	132	132	94	84	57	30	5003462	5003462	4912395	4842946	4406401	3375857	132	304805	5003462	50.56	92287	42777	18	39	0		132	5003462	50.56	5051		4800	99.96	0.11	TRUE
562.22652	168	168	100	77	55	31	5222035	5222035	5071904	4913006	4565178	3714510	168	303056	5222035	50.63	95116	41046	16	36	0		168	5222035	50.63	5227		4944	99.96	0.13	TRUE
562.22653	114	114	95	86	64	36	5011809	5011809	4971725	4910448	4555825	3529283	114	200048	5011809	50.63	86114	45617	20	41	0		114	5011809	50.63	4996		4712	99.96	1.19	TRUE
562.22654	70	70	34	31	28	20	4920636	4920636	4828060	4804856	4756270	4485921	70	972857	4920636	50.41	248416	186542	5	11	0		70	4920636	50.41	4884		4659	99.96	0.13	TRUE
562.22655	83	83	55	49	33	26	5137982	5137982	5069570	5031667	4770317	4525843	83	617269	5137982	50.78	178679	109366	10	18	0		83	5137982	50.78	5137		4863	99.96	0.31	TRUE
562.22656	107	107	65	49	34	21	5121733	5121733	5029227	4907998	4671763	4228728	107	525718	5121733	50.44	186697	109837	9	17	0		107	5121733	50.44	5080		4794	99.96	0.08	TRUE
562.22657	89	89	66	53	35	27	5086060	5086060	5029819	4942815	4649495	4363964	89	433442	5086060	50.71	171954	106261	12	21	0		89	5086060	50.71	5084		4821	99.96	0.08	TRUE
562.22658	51	51	36	34	29	22	4967041	4967041	4934620	4923776	4847800	4624638	51	469926	4967041	50.66	269064	139478	7	13	0		51	4967041	50.66	4875		4648	99.96	0.13	TRUE
562.22659	210	210	134	106	65	30	5244127	5244127	5053401	4852409	4138792	2830452	210	269284	5244127	50.4	51656	32248	26	59	0		210	5244127	50.4	5449		5159	99.14	0.36	TRUE
562.2266	84	84	57	54	47	29	4785590	4785590	4721198	4698885	4558617	3882359	84	322265	4785590	50.63	154751	63101	11	24	0		84	4785590	50.63	4718		4514	99.96	0.08	TRUE
562.22661	68	68	44	41	34	23	5013184	5013184	4965775	4940992	4808687	4392957	68	437301	5013184	50.65	194327	107443	9	17	0		68	5013184	50.65	5002		4742	99.96	0.39	TRUE
562.22662	141	141	87	70	50	34	5353911	5353911	5238023	5120788	4778634	4207914	141	401020	5353911	50.53	130758	63655	15	31	0		141	5353911	50.53	5449		5156	99.96	0.67	TRUE
562.22663	109	109	56	43	35	24	5058985	5058985	4937908	4846325	4730123	4337587	109	452805	5058985	50.48	186575	105003	9	18	0		109	5058985	50.48	5002		4753	99.96	0.08	TRUE
562.22664	93	93	64	55	44	29	5035954	5035954	4968703	4904809	4736237	4203612	93	515319	5035954	50.39	134396	81734	11	23	0		93	5035954	50.39	4972		4698	99.96	0.08	TRUE
562.22665	111	111	79	59	41	28	5011173	5011173	4935867	4795805	4503138	4011291	111	374580	5011173	50.64	157602	56822	11	24	0		111	5011173	50.64	4941		4687	99.96	0.08	TRUE
562.22666	132	132	97	80	52	28	5016609	5016609	4937653	4822447	4339214	3415226	132	286377	5016609	50.56	97096	43616	16	36	0		132	5016609	50.56	5040		4781	99.96	0.31	TRUE
562.22667	80	80	47	36	31	20	5067810	5067810	4991050	4916461	4846492	4453248	80	584000	5067810	50.33	231256	133835	7	14	0		80	5067810	50.33	5074		4808	99.96	0.39	TRUE
562.22668	104	104	56	48	38	25	5092702	5092702	4969988	4912650	4755457	4315590	104	437715	5092702	50.51	173681	101989	9	18	0		104	5092702	50.51	5172		4892	99.88	0.93	TRUE
562.22669	135	135	71	58	39	30	5080577	5080577	4941912	4847239	4535987	4225102	135	325628	5080577	50.8	165175	78736	12	24	0		135	5080577	50.8	5068		4809	99.96	0.11	TRUE
562.2267	71	71	51	46	40	27	5056188	5056188	5006224	4968607	4868388	4431624	71	424667	5056188	50.51	180446	95883	10	19	0		71	5056188	50.51	5001		4763	99.88	0.12	TRUE
562.22671	114	114	71	54	44	28	5415805	5415805	5321214	5203264	5036894	4469089	114	449687	5415805	50.4	162585	84549	11	23	0		114	5415805	50.4	5576		5256	99.96	0.97	TRUE
562.22672	132	132	85	67	51	32	5151560	5151560	5046882	4928608	4641132	3956012	132	378353	5151560	50.63	106873	53902	14	31	0		132	5151560	50.63	5123		4845	99.96	0.13	TRUE
562.22673	85	85	46	43	37	28	5031330	5031330	4952516	4929165	4835499	4499811	85	418121	5031330	50.58	172756	113364	10	19	0		85	5031330	50.58	5024		4759	99.96	0.62	TRUE
562.22674	102	102	61	51	37	27	5133821	5133821	5046736	4975801	4748015	4393636	102	493425	5133821	50.41	196397	98019	9	20	0		102	5133821	50.41	5168		4857	99.96	0.08	TRUE
562.22675	58	58	43	40	36	28	4903109	4903109	4872357	4850000	4775226	4490066	58	347430	4903109	50.66	192305	119822	10	18	0.02		58	4903109	50.66	4797		4570	99.96	0.76	TRUE
562.22676	124	124	84	71	51	29	5255458	5255458	5163809	5075566	4735759	3947716	124	395997	5255458	50.62	134217	50826	13	29	0		124	5255458	50.62	5242		4984	99.96	0.13	TRUE
562.22677	117	117	82	73	60	35	4866262	4866262	4783398	4716133	4512590	3625218	117	216385	4866262	50.71	92935	49952	17	36	0		117	4866262	50.71	4850		4611	99.65	0.39	TRUE
562.22678	57	57	40	39	36	27	4916821	4916821	4873429	4867261	4827872	4529865	57	527819	4916821	50.45	193255	114159	7	15	0		57	4916821	50.45	4886		4658	99.96	0.08	TRUE
562.22679	128	128	86	71	55	34	5086140	5086140	5001325	4896857	4644529	3866611	128	310084	5086140	50.45	92265	53309	15	33	0		128	5086140	50.45	5053		4773	99.96	0.23	TRUE
562.2268	106	106	69	56	38	28	5220420	5220420	5142661	5056944	4782266	4416356	106	381496	5220420	50.68	167915	96366	12	22	0		106	5220420	50.68	5264		4993	99.96	0.58	TRUE
562.22681	97	97	67	61	43	30	5035957	5035957	4966594	4918731	4619377	4155036	97	375607	5035957	50.64	152516	69669	12	24	0		97	5035957	50.64	4974		4707	99.96	0.08	TRUE
562.22682	104	104	62	46	35	26	5165437	5165437	5071978	4950864	4769907	4463175	104	535602	5165437	50.48	179396	104990	10	19	0		104	5165437	50.48	5168		4858	99.96	0.08	TRUE
562.22683	125	125	69	51	37	26	5231443	5231443	5103538	4967127	4754760	4390641	125	359038	5231443	50.38	182622	94740	10	20	0		125	5231443	50.38	5292		4965	99.96	0.08	TRUE
562.22684	117	117	65	53	36	23	5110085	5110085	4989395	4902457	4653812	4223029	117	537973	5110085	50.36	179598	103131	9	19	0		117	5110085	50.36	5089		4795	99.96	0.08	TRUE
562.22685	133	133	65	55	35	24	5057226	5057226	4906387	4832429	4532852	4148171	133	452079	5057226	50.72	181870	102268	10	19	0		133	5057226	50.72	5058		4786	99.88	0.11	TRUE
562.22686	107	107	58	49	39	26	5101249	5101249	4993248	4924507	4791921	4364596	107	380783	5101249	50.46	179415	105239	10	19	0		107	5101249	50.46	5104		4802	99.96	0.08	TRUE
562.22687	141	141	82	69	54	32	5148227	5148227	5000114	4909967	4676335	3844239	141	255767	5148227	50.51	119300	49114	15	33	0		141	5148227	50.51	5243		4902	99.96	0.18	TRUE
562.22688	146	146	91	75	57	35	5382713	5382713	5256430	5150157	4848357	4042627	146	264945	5382713	50.68	97989	50510	17	35	0		146	5382713	50.68	5432		5122	99.96	0.13	TRUE
562.22689	119	119	65	53	37	23	5359101	5359101	5241028	5155442	4949424	4492636	119	484371	5359101	50.36	183013	115303	10	18	0		119	5359101	50.36	5433		5119	99.96	0.08	TRUE
562.2269	109	109	66	55	43	34	4811933	4811933	4718246	4630841	4443861	4108428	109	281906	4811933	50.55	130354	63915	13	26	0		109	4811933	50.55	4729		4479	99.96	0.15	TRUE
562.22691	81	81	54	49	33	23	4810292	4810292	4738872	4699865	4453371	4102467	81	344522	4810292	50.71	186427	109233	10	18	0		81	4810292	50.71	4710		4469	99.96	0.08	TRUE
562.22692	116	116	70	64	50	28	4758848	4758848	4659121	4612589	4371760	3607059	116	451961	4758848	50.74	119541	50382	12	28	0		116	4758848	50.74	4646		4438	99.96	0.11	TRUE
562.22693	118	118	77	62	45	30	5114823	5114823	5020721	4919887	4639488	4110269	118	395998	5114823	50.67	126257	64072	12	26	0		118	5114823	50.67	5081		4814	99.96	0.13	TRUE
562.22694	92	92	57	50	33	26	5043057	5043057	4966502	4917006	4634495	4362577	92	308610	5043057	50.81	180449	109366	12	20	0		92	5043057	50.81	5027		4773	99.96	0.08	TRUE
562.22695	131	131	76	59	46	29	5179953	5179953	5060244	4929737	4716929	4114042	131	343052	5179953	50.56	152514	57160	12	25	0		131	5179953	50.56	5172		4884	99.96	0.62	TRUE
562.22696	86	86	55	44	35	22	5041238	5041238	4967998	4888390	4763004	4329352	86	499626	5041238	50.52	190875	118746	9	17	0		86	5041238	50.52	4998		4735	99.96	0.08	TRUE
562.22697	92	92	57	54	41	30	5013390	5013390	4937564	4920201	4728785	4355831	92	509661	5013390	50.52	151330	92368	10	21	0		92	5013390	50.52	5031		4786	99.86	0.08	TRUE
562.22698	88	88	70	58	42	28	4883205	4883205	4843486	4752181	4497939	3989116	88	327520	4883205	50.56	143143	76230	12	23	0		88	4883205	50.56	4792		4543	99.65	0.08	TRUE
562.22699	132	132	58	46	32	21	5149892	5149892	4980074	4892643	4685328	4313703	132	481464	5149892	50.38	221686	102911	9	16	0		132	5149892	50.38	5196		4923	99.88	0.08	TRUE
562.227	127	127	84	69	53	30	4783949	4783949	4680084	4567330	4303261	3428907	127	410564	4783949	50.85	95786	45539	16	34	0		127	4783949	50.85	4780		4530	99.96	0.39	TRUE
562.22701	144	144	92	79	57	36	5035442	5035442	4902797	4808316	4433584	3651365	144	324628	5035442	50.38	92864	47957	19	39	0		144	5035442	50.38	5068		4811	99.88	0.31	TRUE
562.22702	131	131	75	55	41	30	5091693	5091693	4966177	4825738	4593549	4207008	131	342814	5091693	50.4	121439	84001	12	24	0		131	5091693	50.4	5104		4819	99.34	0.08	TRUE
562.22703	95	95	55	45	37	25	5107592	5107592	5016903	4940155	4804065	4395354	95	524824	5107592	50.62	181812	89630	8	18	0		95	5107592	50.62	5134		4850	99.96	0.08	TRUE
562.22704	100	100	65	50	38	28	5090388	5090388	5011135	4901501	4694670	4363123	100	402016	5090388	50.51	185486	97785	10	20	0		100	5090388	50.51	5034		4751	99.96	0.08	TRUE
562.22705	100	100	58	46	36	23	4944090	4944090	4848485	4760279	4616413	4155088	100	404850	4944090	50.51	176141	101977	9	17	0		100	4944090	50.51	4937		4663	99.96	0.93	TRUE
562.22706	125	125	69	54	43	27	5157316	5157316	5026270	4919942	4741079	4148120	125	329446	5157316	50.51	172276	72126	12	23	0		125	5157316	50.51	5246		4957	99.96	0.11	TRUE
562.22707	111	111	74	67	48	25	4941929	4941929	4855022	4799969	4460550	3626517	111	486094	4941929	50.72	130904	46342	12	27	0		111	4941929	50.72	4964		4715	99.96	0.39	TRUE
562.22708	125	125	74	61	40	27	5264400	5264400	5135769	5042837	4684973	4219870	125	429778	5264400	50.45	170089	71650	11	23	0		125	5264400	50.45	5269		4988	99.96	0.91	TRUE
562.22709	101	101	56	45	35	23	4988598	4988598	4892284	4816266	4670450	4258446	101	423222	4988598	50.51	189204	109513	8	17	0		101	4988598	50.51	5006		4728	99.96	0.93	TRUE
562.2271	104	104	59	47	33	25	5050081	5050081	4950511	4864413	4655983	4382789	104	430176	5050081	50.3	189450	101648	9	18	0		104	5050081	50.3	5007		4724	99.96	0.08	TRUE
562.22711	98	98	57	43	35	22	5108404	5108404	5025536	4925713	4807435	4374138	98	498238	5108404	50.56	203861	113150	8	16	0		98	5108404	50.56	5153		4865	99.96	0.08	TRUE
562.22712	87	87	51	41	33	26	4953790	4953790	4865907	4795004	4655791	4411011	87	456413	4953790	50.56	185497	113079	9	17	0		87	4953790	50.56	4863		4612	99.96	0.08	TRUE
562.22713	104	104	60	53	43	31	5056514	5056514	4960322	4906792	4743565	4303344	104	378383	5056514	50.68	157291	81009	11	23	0		104	5056514	50.68	4979		4742	99.96	0.08	TRUE
562.22714	92	92	63	53	37	27	5074108	5074108	5007146	4938430	4661540	4293993	92	401992	5074108	50.42	181524	84605	10	20	0		92	5074108	50.42	5022		4744	99.96	0.08	TRUE
562.22715	67	67	42	38	32	25	5114939	5114939	5057074	5029031	4931781	4673065	67	528497	5114939	50.66	215149	129027	8	15	0		67	5114939	50.66	5048		4803	99.96	0.08	TRUE
562.22716	87	87	48	41	32	21	4983647	4983647	4886957	4837469	4709141	4340045	87	527861	4983647	50.38	223112	137127	8	14	0		87	4983647	50.38	4955		4709	99.88	0.08	TRUE
562.22717	128	128	71	57	38	28	5221330	5221330	5094482	4995028	4674842	4333335	128	388730	5221330	50.67	159742	87086	12	23	0		128	5221330	50.67	5267		4998	99.96	0.08	TRUE
562.22718	97	97	75	58	38	26	5283862	5283862	5237247	5116992	4805610	4391566	97	472234	5283862	50.57	173826	95930	11	21	0		97	5283862	50.57	5372		5090	99.96	0.58	TRUE
562.22719	73	73	55	52	42	33	5013235	5013235	4974901	4957674	4788395	4487620	73	278115	5013235	50.57	150860	87695	12	24	0		73	5013235	50.57	5021		4770	99.96	0.58	TRUE
562.2272	116	116	88	81	58	32	4622809	4622809	4563879	4506565	4080112	3098654	116	179956	4622809	50.74	81414	42603	21	41	0		116	4622809	50.74	4531		4341	99.96	0.15	TRUE
562.22721	115	115	72	58	45	27	5131676	5131676	5028584	4923511	4711279	4099699	115	435452	5131676	50.48	136587	60887	10	23	0		115	5131676	50.48	5208		4903	99.96	0.69	TRUE
562.22722	196	196	107	90	62	37	5277132	5277132	5098224	4972481	4491352	3549398	196	197652	5277132	50.44	79634	42203	22	47	0		196	5277132	50.44	5345		5059	99.96	0.12	TRUE
562.22723	67	67	45	42	31	19	5192969	5192969	5140173	5115481	4955359	4510521	67	520118	5192969	50.64	253550	175921	7	13	0		67	5192969	50.64	5235		4951	99.96	0.62	TRUE
562.22724	85	85	57	50	43	27	5002170	5002170	4948255	4896447	4764665	4160072	85	378776	5002170	50.74	154556	104996	12	21	0		85	5002170	50.74	4948		4730	99.96	0.39	TRUE
562.22725	94	94	63	58	44	30	5062704	5062704	4992603	4960568	4763815	4283171	94	350742	5062704	50.52	156093	78282	12	23	0		94	5062704	50.52	5019		4756	99.96	0.13	TRUE
562.22726	58	58	42	37	31	24	4865793	4865793	4829954	4798209	4676513	4433888	58	539703	4865793	50.71	188169	119728	8	16	0		58	4865793	50.71	4818		4605	99.96	0.08	TRUE
562.22727	103	103	63	50	40	26	5103429	5103429	5003996	4916727	4767616	4288363	103	473132	5103429	50.64	159678	92817	10	20	0		103	5103429	50.64	5144		4881	99.96	0.39	TRUE
562.22728	138	138	81	58	41	28	5209431	5209431	5076879	4917130	4628691	4152188	138	360094	5209431	50.69	150981	62528	12	24	0		138	5209431	50.69	5269		4981	99.96	0.39	TRUE
562.22729	91	91	51	43	35	24	5191330	5191330	5104310	5052806	4927859	4542341	91	464309	5191330	50.53	185897	129148	9	17	0		91	5191330	50.53	5267		4951	99.96	0.62	TRUE
562.2273	102	102	68	56	41	27	5244839	5244839	5163326	5076811	4815618	4327176	102	439210	5244839	50.64	173996	76933	11	22	0		102	5244839	50.64	5341		5025	99.96	0.39	TRUE
562.22731	58	58	45	43	37	25	4813982	4813982	4780766	4766751	4661821	4223725	58	349972	4813982	50.58	201854	101602	9	18	0		58	4813982	50.58	4759		4554	99.96	0.08	TRUE
562.22732	61	61	44	40	31	20	5074461	5074461	5034665	5004596	4877813	4488549	61	691346	5074461	50.54	203769	133141	7	14	0		61	5074461	50.54	5076		4800	99.96	0.62	TRUE
562.22733	90	90	63	55	34	28	5043595	5043595	4972544	4916901	4541117	4311306	90	436232	5043595	50.73	173928	95949	11	21	0		90	5043595	50.73	4994		4733	99.96	0.08	TRUE
562.22734	155	155	85	73	53	33	5262845	5262845	5104207	5014593	4710220	3972434	155	293858	5262845	50.44	105606	53279	15	33	0		155	5262845	50.44	5311		5007	99.96	0.08	TRUE
562.22735	119	119	80	67	52	31	5222692	5222692	5136862	5049581	4766191	4008752	119	372902	5222692	50.68	118931	53368	14	30	0		119	5222692	50.68	5204		4948	99.96	0.13	TRUE
562.22736	84	84	54	46	35	23	5010106	5010106	4949167	4893650	4711968	4307042	84	486916	5010106	50.53	189437	113139	8	16	0		84	5010106	50.53	5032		4759	99.96	0.62	TRUE
562.22737	174	174	100	80	57	31	5306516	5306516	5126971	4988739	4623246	3667119	174	357441	5306516	50.54	92194	43817	15	38	0		174	5306516	50.54	5356		5051	99.96	0.08	TRUE
562.22738	108	108	63	52	34	25	5091765	5091765	4983985	4903497	4648106	4344677	108	526767	5091765	50.48	179230	104822	10	19	0		108	5091765	50.48	5034		4760	99.96	0.08	TRUE
562.2274	44	44	32	31	30	23	4926129	4926129	4897241	4890209	4879819	4643552	44	527818	4926129	50.45	245794	189568	6	12	0		44	4926129	50.45	4858		4634	99.96	0.08	TRUE
562.22741	149	149	85	71	48	31	5330060	5330060	5184890	5096750	4721593	4131030	149	366445	5330060	50.32	128175	55444	14	29	0		149	5330060	50.32	5396		5069	99.96	0.08	TRUE
562.22742	107	107	55	47	37	24	5216200	5216200	5098227	5044571	4883962	4428712	107	569537	5216200	50.48	179429	101025	8	17	0		107	5216200	50.48	5206		4913	99.96	0.08	TRUE
562.22743	73	73	45	40	32	21	4879590	4879590	4829551	4791764	4651525	4236648	73	527676	4879590	50.51	234809	113132	7	14	0		73	4879590	50.51	4819		4579	99.96	0.39	TRUE
562.22744	91	91	52	44	36	25	5129594	5129594	5022572	4969001	4858257	4477312	91	529695	5129594	50.4	203089	111777	9	17	0		91	5129594	50.4	5108		4813	99.96	0.08	TRUE
562.22745	133	133	82	70	46	32	5168545	5168545	5055757	4972877	4585190	4127285	133	402011	5168545	50.43	114162	69836	14	28	0		133	5168545	50.43	5144		4849	99.96	0.12	TRUE
562.22746	180	180	120	94	62	34	4815057	4815057	4679166	4496704	3955253	2941973	180	229763	4815057	50.66	67760	34110	25	51	0		180	4815057	50.66	4891		4634	99.96	0.15	TRUE
562.22747	125	125	80	71	54	32	4919385	4919385	4831585	4762585	4505093	3678756	125	251556	4919385	50.66	111816	48625	16	33	0		125	4919385	50.66	4923		4680	99.73	0.23	TRUE
562.22748	125	125	76	65	49	32	4972034	4972034	4867313	4794097	4538877	3902100	125	299031	4972034	50.44	113098	67659	15	29	0		125	4972034	50.44	4908		4628	99.96	0.12	TRUE
562.22749	132	132	80	64	51	31	5209015	5209015	5079732	4960010	4731681	4005024	132	422667	5209015	50.72	117639	57076	13	30	0		132	5209015	50.72	5186		4904	99.96	0.13	TRUE
562.2275	119	119	77	64	46	25	5130529	5130529	5042909	4942173	4646827	3865323	119	342986	5130529	50.51	154390	51722	11	25	0		119	5130529	50.51	5099		4835	99.96	0.62	TRUE
562.22751	187	187	109	82	56	29	5361748	5361748	5192706	5016980	4556224	3604114	187	344881	5361748	50.64	102709	36816	17	39	0		187	5361748	50.64	5417		5105	99.96	0.67	TRUE
562.22752	110	110	72	63	49	31	5211564	5211564	5108156	5042308	4810892	4140370	110	350041	5211564	50.44	124961	60305	13	27	0		110	5211564	50.44	5223		4911	99.65	0.08	TRUE
562.22753	104	104	58	44	36	23	5202174	5202174	5093540	4992599	4868866	4446452	104	499847	5202174	50.49	186106	114637	9	17	0		104	5202174	50.49	5229		4927	99.88	0.08	TRUE
562.22754	123	123	76	68	42	29	5310967	5310967	5201235	5142700	4741046	4318798	123	301857	5310967	50.63	161428	82469	14	25	0		123	5310967	50.63	5442		5124	99.96	0.08	TRUE
562.22755	126	126	78	64	39	26	5095044	5095044	4985072	4889174	4517315	4057801	126	326407	5095044	50.65	171480	71541	12	23	0		126	5095044	50.65	5158		4855	99.96	0.11	TRUE
562.22756	169	169	122	97	57	33	4978774	4978774	4861981	4686595	4010025	3151010	169	270384	4978774	50.52	69632	33577	21	48	0		169	4978774	50.52	4965		4670	99.96	0.12	TRUE
562.22757	208	208	128	101	70	33	5098453	5098453	4900416	4721611	4237985	2868478	208	191759	5098453	50.51	55007	32757	27	57	0		208	5098453	50.51	5200		4930	99.34	0.67	TRUE
562.22758	96	96	58	54	45	28	4809870	4809870	4725608	4698020	4550202	3959534	96	331605	4809870	50.8	153053	72658	12	23	0		96	4809870	50.8	4737		4521	99.96	0.08	TRUE
562.22759	112	112	64	51	35	23	5120299	5120299	5005528	4902896	4661637	4267789	112	525637	5120299	50.44	185580	109166	9	18	0		112	5120299	50.44	5099		4799	99.96	0.08	TRUE
562.2276	47	47	31	30	29	21	4720353	4720353	4688049	4681398	4667891	4387777	47	511013	4720353	50.77	256239	184401	7	13	0		47	4720353	50.77	4641		4425	99.96	0.08	TRUE
562.22761	104	104	60	49	37	25	5109474	5109474	4997890	4922982	4743091	4341728	104	373646	5109474	50.54	186578	102708	10	20	0.02		104	5109474	50.54	5060		4790	99.88	0.08	TRUE
562.22762	100	100	64	49	35	23	4921007	4921007	4839853	4734996	4513581	4073764	100	368862	4921007	50.6	180448	106047	10	19	0		100	4921007	50.6	4872		4621	99.96	0.11	TRUE
562.22763	57	57	45	44	39	29	4723605	4723605	4698313	4691714	4609120	4253732	57	490186	4723605	50.64	152802	103873	11	20	0		57	4723605	50.64	4563		4351	99.96	0.08	TRUE
562.22764	144	144	81	69	52	30	5244016	5244016	5090097	5007581	4720096	3934683	144	320544	5244016	50.41	124277	52328	14	30	0		144	5244016	50.41	5272		4970	99.96	0.08	TRUE
562.22765	93	93	58	53	45	33	5085055	5085055	5009521	4977802	4844768	4410879	93	451301	5085055	50.64	134250	72101	11	24	0		93	5085055	50.64	5000		4722	99.96	0.08	TRUE
562.22766	127	127	67	51	40	25	5190738	5190738	5054464	4933115	4758347	4233890	127	435216	5190738	50.6	178191	84489	9	20	0		127	5190738	50.6	5300		5027	99.96	0.62	TRUE
562.22767	117	117	69	55	40	25	5211053	5211053	5092304	4995309	4744957	4238027	117	472646	5211053	50.52	162928	73167	10	20	0		117	5211053	50.52	5332		5034	99.96	0.62	TRUE
562.22768	99	99	65	50	32	26	5171292	5171292	5098876	4992424	4719480	4507587	99	364314	5171292	50.72	182783	109329	11	20	0		99	5171292	50.72	5223		4925	99.96	0.08	TRUE
562.22769	166	166	83	65	43	29	5186945	5186945	5005838	4873346	4514673	4018006	166	378073	5186945	50.5	121222	57271	12	27	0		166	5186945	50.5	5231		4935	99.96	0.08	TRUE
562.2277	85	85	62	58	46	31	4908442	4908442	4868627	4840715	4620963	4102790	85	429352	4908442	50.8	120225	82876	13	25	0		85	4908442	50.8	4876		4636	99.96	0.39	TRUE
562.22771	91	91	49	45	35	24	5127472	5127472	5035335	5009077	4845683	4438880	91	479666	5127472	50.52	198576	113543	9	18	0		91	5127472	50.52	5050		4812	99.96	0.08	TRUE
562.22772	154	154	86	72	56	36	5212001	5212001	5053511	4959883	4705492	3955158	154	275180	5212001	50.65	88421	51387	17	36	0.02		154	5212001	50.65	5180		4925	99.96	0.36	TRUE
562.22773	80	80	61	50	41	29	5093473	5093473	5048103	4971292	4835064	4425319	80	308622	5093473	50.68	175086	106034	12	22	0		80	5093473	50.68	5076		4815	99.96	0.08	TRUE
562.22774	126	126	67	54	38	27	5076923	5076923	4939015	4842150	4588252	4187241	126	405855	5076923	50.33	174035	77166	10	22	0		126	5076923	50.33	5019		4742	99.96	0.08	TRUE
562.22775	121	121	82	69	55	37	4874117	4874117	4790007	4691884	4500351	3866938	121	278694	4874117	50.72	97830	54615	17	34	0		121	4874117	50.72	4867		4609	99.96	0.08	TRUE
562.22776	74	74	45	40	34	26	4907236	4907236	4844496	4806780	4707255	4425475	74	465417	4907236	50.59	194131	110509	10	18	0		74	4907236	50.59	4823		4602	99.96	0.39	TRUE
562.22777	87	87	55	47	33	24	4961691	4961691	4889615	4833617	4627465	4317066	87	515531	4961691	50.47	177749	103904	8	17	0		87	4961691	50.47	4845		4603	99.96	0.08	TRUE
562.22778	108	108	65	53	34	25	4990037	4990037	4885220	4802339	4506551	4193350	108	364395	4990037	50.78	181461	109239	11	19	0		108	4990037	50.78	4977		4711	99.96	0.11	TRUE
562.22779	144	144	100	81	62	37	5321371	5321371	5208762	5075598	4756126	3842738	144	246907	5321371	50.54	88421	47874	20	41	0		144	5321371	50.54	5322		5032	99.96	0.71	TRUE
562.2278	104	104	73	64	52	30	4846357	4846357	4775514	4706892	4475967	3718510	104	253307	4846357	50.72	143552	53561	13	29	0		104	4846357	50.72	4803		4584	99.96	0.08	TRUE
562.22781	106	106	61	49	34	25	5031029	5031029	4926799	4842292	4578088	4269480	106	493424	5031029	50.37	192477	96918	9	19	0.02		106	5031029	50.37	5036		4735	99.96	0.12	TRUE
562.22782	113	113	62	47	38	26	5111861	5111861	4997548	4890232	4764842	4338620	113	379273	5111861	50.44	185303	94856	10	19	0		113	5111861	50.44	5084		4789	99.96	0.13	TRUE
562.22783	128	128	72	58	40	30	5066238	5066238	4954552	4848047	4576013	4213868	128	325485	5066238	50.79	159114	81246	13	24	0		128	5066238	50.79	5044		4797	99.96	0.11	TRUE
562.22784	77	77	50	42	32	24	5130459	5130459	5074248	5007727	4827917	4529789	77	413644	5130459	50.51	198134	123840	9	17	0		77	5130459	50.51	5103		4848	99.96	0.08	TRUE
562.22785	117	117	81	62	46	32	5229965	5229965	5145755	5008763	4724948	4231076	117	433113	5229965	50.69	131775	65708	13	27	0		117	5229965	50.69	5247		4968	99.96	0.13	TRUE
562.22786	138	138	85	70	50	30	5217035	5217035	5088875	4981729	4638400	3900892	138	396009	5217035	50.63	130077	48694	14	31	0		138	5217035	50.63	5248		4973	99.96	0.13	TRUE
562.22787	128	128	75	52	39	27	5210378	5210378	5084007	4925838	4726958	4325156	128	359050	5210378	50.39	179286	84589	11	21	0		128	5210378	50.39	5255		4941	99.96	0.13	TRUE
562.22788	95	95	62	56	44	29	5060720	5060720	4982542	4942823	4780321	4245318	95	350742	5060720	50.51	156093	78282	12	23	0		95	5060720	50.51	5013		4755	99.96	0.13	TRUE
562.22789	74	74	48	37	35	21	5228333	5228333	5166602	5087907	5045882	4535694	74	497422	5228333	50.63	203862	133927	8	15	0		74	5228333	50.63	5247		4952	99.96	0.93	TRUE
562.2279	105	105	64	49	36	26	5023910	5023910	4929520	4829929	4614782	4278805	105	402107	5023910	50.51	202446	97667	9	19	0		105	5023910	50.51	4972		4690	99.96	0.08	TRUE
562.22791	64	64	42	38	33	23	4883606	4883606	4829936	4800082	4721281	4356690	64	447186	4883606	50.49	196211	137937	9	15	0		64	4883606	50.49	4840		4594	99.96	0.39	TRUE
562.22792	116	116	64	59	47	30	5147835	5147835	5044740	5006910	4832228	4231322	116	325347	5147835	50.48	150221	80765	13	25	0		116	5147835	50.48	5099		4830	99.96	0.31	TRUE
562.22793	62	62	46	42	37	26	5092096	5092096	5055561	5027829	4952265	4600909	62	499042	5092096	50.51	176415	122992	10	18	0		62	5092096	50.51	5048		4790	99.96	0.58	TRUE
562.22794	90	90	59	47	34	26	4935969	4935969	4853561	4773771	4562095	4277705	90	378385	4935969	50.58	189436	101971	10	19	0		90	4935969	50.58	4922		4654	99.96	0.62	TRUE
562.22795	46	46	32	31	30	22	4757899	4757899	4729817	4721977	4711698	4440934	46	974883	4757899	50.53	209623	169075	5	11	0		46	4757899	50.53	4669		4468	99.96	0.08	TRUE
562.22796	45	45	35	33	30	24	4664453	4664453	4643828	4631198	4594170	4359097	45	415323	4664453	50.65	226338	107432	8	15	0		45	4664453	50.65	4561		4366	99.96	0.39	TRUE
562.22797	94	94	67	55	40	28	5112499	5112499	5054386	4965724	4700055	4313657	94	344026	5112499	50.72	163754	89886	12	22	0		94	5112499	50.72	5153		4869	99.96	0.08	TRUE
562.22798	108	108	73	59	45	31	5111275	5111275	5032059	4936483	4720849	4238669	108	370189	5111275	50.55	157602	69412	13	24	0		108	5111275	50.55	5091		4823	99.96	0.62	TRUE
562.22799	91	91	68	58	44	31	4956895	4956895	4900340	4827072	4599672	4145183	91	284924	4956895	50.55	139504	67475	12	24	0		91	4956895	50.55	4872		4618	99.96	0.08	TRUE
562.228	99	99	62	52	38	25	5010673	5010673	4917120	4855147	4623387	4173739	99	466423	5010673	50.35	169140	89131	10	20	0		99	5010673	50.35	4944		4693	99.96	0.08	TRUE
562.22801	93	93	48	40	35	25	4957899	4957899	4862063	4800389	4703119	4341346	93	539750	4957899	50.63	172828	113144	9	18	0		93	4957899	50.63	4930		4702	99.96	0.08	TRUE
562.22802	125	125	74	65	47	26	5178536	5178536	5065510	5005248	4694294	3919837	125	356756	5178536	50.42	145730	54032	13	26	0		125	5178536	50.42	5228		4944	99.96	0.75	TRUE
562.22803	74	74	44	38	32	23	5068103	5068103	4995611	4950825	4860409	4535988	74	557818	5068103	50.5	185898	130472	8	16	0		74	5068103	50.5	5085		4812	99.96	0.62	TRUE
562.22804	62	62	43	38	31	21	5031050	5031050	4989365	4954222	4853527	4495072	62	557818	5031050	50.52	189194	133135	8	15	0		62	5031050	50.52	5029		4752	99.96	0.62	TRUE
562.22805	64	64	48	42	33	23	5073853	5073853	5037525	4996426	4851232	4499049	64	519708	5073853	50.49	189395	124878	8	16	0		64	5073853	50.49	5065		4780	99.96	0.62	TRUE
562.22806	101	101	72	61	44	29	5130189	5130189	5067391	4989600	4697104	4195181	101	344099	5130189	50.77	159741	74751	12	24	0		101	5130189	50.77	5180		4894	99.96	0.08	TRUE
562.22807	79	79	52	47	37	27	4980463	4980463	4932208	4904203	4723788	4387041	79	374284	4980463	50.52	188063	95136	10	18	0		79	4980463	50.52	4877		4659	99.96	0.31	TRUE
562.22808	82	82	54	47	36	24	5242843	5242843	5177017	5130193	4952813	4546218	82	519708	5242843	50.43	189968	113357	8	17	0		82	5242843	50.43	5296		4996	99.96	0.62	TRUE
562.22809	119	119	86	76	62	33	5003844	5003844	4937526	4864965	4628740	3584389	119	253894	5003844	50.54	89281	44615	17	37	0		119	5003844	50.54	5049		4798	99.96	0.62	TRUE
562.2281	75	75	53	49	43	29	4963559	4963559	4918388	4892367	4793363	4294426	75	298536	4963559	50.66	191121	87847	11	21	0		75	4963559	50.66	4894		4672	99.96	0.08	TRUE
562.22811	119	119	80	63	37	29	5117190	5117190	5026484	4913623	4504808	4208159	119	433434	5117190	50.7	159842	77078	13	24	0		119	5117190	50.7	5153		4865	99.96	0.08	TRUE
562.22812	122	122	64	51	38	28	5232185	5232185	5096025	5003976	4801800	4455833	122	359075	5232185	50.44	179415	94740	11	21	0		122	5232185	50.44	5265		4948	99.96	0.08	TRUE
562.22813	130	130	73	57	40	29	5208066	5208066	5087079	4971415	4698855	4294055	130	330574	5208066	50.74	144251	93290	14	24	0		130	5208066	50.74	5246		4958	99.96	0.16	TRUE
562.22814	91	91	59	50	35	25	4983260	4983260	4896686	4831988	4581240	4245974	91	362970	4983260	50.67	180627	109276	11	19	0		91	4983260	50.67	4968		4708	99.96	0.11	TRUE
562.22815	85	85	55	48	32	23	4932917	4932917	4860675	4818969	4578500	4253949	85	401870	4932917	50.72	186427	130946	9	17	0		85	4932917	50.72	4858		4613	99.96	0.11	TRUE
562.22816	111	111	65	48	30	22	5084225	5084225	4970280	4854870	4561554	4269992	111	565035	5084225	50.42	202447	113115	8	17	0		111	5084225	50.42	5094		4794	99.96	0.08	TRUE
562.22817	76	76	47	41	32	24	4912406	4912406	4841329	4798924	4667612	4395343	76	520565	4912406	50.54	185665	128141	9	17	0		76	4912406	50.54	4806		4555	99.96	0.08	TRUE
562.22818	117	117	72	55	41	26	5171129	5171129	5065742	4939747	4711764	4195724	117	402125	5171129	50.4	178752	73139	10	22	0		117	5171129	50.4	5189		4890	99.96	0.08	TRUE
562.22819	112	112	67	50	35	24	5149180	5149180	5052437	4926726	4692753	4324428	112	525689	5149180	50.44	179250	110588	10	19	0		112	5149180	50.44	5123		4829	99.96	0.08	TRUE
562.2282	69	69	46	43	32	25	5050204	5050204	4993627	4970010	4773911	4493644	69	422270	5050204	50.62	192157	123934	10	17	0		69	5050204	50.62	4985		4730	99.96	0.08	TRUE
562.22821	104	104	72	63	42	29	5184716	5184716	5112770	5048876	4706492	4279348	104	343974	5184716	50.77	163962	76336	12	24	0		104	5184716	50.77	5251		4951	99.96	0.08	TRUE
562.22822	119	119	77	65	42	28	5333454	5333454	5233073	5154836	4794223	4325380	119	275034	5333454	50.65	165377	92125	14	24	0		119	5333454	50.65	5488		5171	99.96	0.08	TRUE
562.22823	41	41	33	32	31	21	4848681	4848681	4826819	4820271	4809992	4466216	41	902046	4848681	50.5	245312	175448	6	12	0		41	4848681	50.5	4802		4600	99.96	0.08	TRUE
562.22824	82	82	51	44	34	26	4933391	4933391	4860199	4808783	4655503	4363417	82	494577	4933391	50.44	196399	98110	8	18	0		82	4933391	50.44	4875		4621	99.96	0.12	TRUE
562.22825	146	146	67	54	41	31	5082825	5082825	4915361	4826656	4623967	4287488	146	224508	5082825	50.64	147574	97519	14	25	0		146	5082825	50.64	5104		4827	99.96	0.13	TRUE
562.22826	92	92	60	50	39	27	5181436	5181436	5093353	5030702	4862003	4452506	92	529695	5181436	50.4	204705	101672	8	18	0		92	5181436	50.4	5181		4874	99.96	0.08	TRUE
562.22827	69	69	47	38	29	20	4974141	4974141	4926086	4858114	4714946	4416674	69	497184	4974141	50.47	240433	130678	7	14	0		69	4974141	50.47	4887		4634	99.96	0.08	TRUE
562.22828	75	75	49	43	32	23	4963585	4963585	4906196	4858545	4675679	4385942	75	423689	4963585	50.56	185986	130974	9	17	0		75	4963585	50.56	4935		4675	99.96	0.68	TRUE
562.22829	84	84	53	44	34	26	4934886	4934886	4860928	4793722	4636578	4359129	84	451370	4934886	50.48	183504	113061	10	18	0		84	4934886	50.48	4842		4607	99.65	0.08	TRUE
562.2283	106	106	69	60	39	29	5129006	5129006	5042024	4976788	4629160	4264356	106	344798	5129006	50.47	164996	85541	12	24	0		106	5129006	50.47	5111		4831	99.96	0.12	TRUE
562.22831	119	119	59	48	35	25	5144973	5144973	5005521	4929486	4719836	4367732	119	409261	5144973	50.53	192819	113312	11	19	0		119	5144973	50.53	5172		4883	99.96	0.08	TRUE
562.22832	120	120	81	62	38	30	5224317	5224317	5142005	5009259	4639638	4342734	120	378226	5224317	50.38	127414	85657	12	24	0		120	5224317	50.38	5221		4898	99.96	0.08	TRUE
562.22833	118	118	66	52	37	25	5062839	5062839	4948218	4846522	4601861	4203992	118	402103	5062839	50.41	186519	94840	9	20	0		118	5062839	50.41	4994		4717	99.96	0.08	TRUE
562.22834	70	70	37	35	32	25	5065576	5065576	4992388	4979124	4916750	4661904	70	560784	5065576	50.45	231235	112172	7	15	0		70	5065576	50.45	4962		4748	99.96	0.08	TRUE
562.22835	155	155	92	75	51	34	5134149	5134149	4980356	4866615	4475694	3893146	155	379523	5134149	50.61	90255	50110	15	34	0		155	5134149	50.61	5077		4830	99.96	0.08	TRUE
562.22836	144	144	77	58	40	26	5167078	5167078	5005596	4873009	4586810	4105825	144	430941	5167078	50.49	179692	57999	10	22	0		144	5167078	50.49	5181		4897	99.96	0.08	TRUE
562.22837	121	121	72	59	45	29	5065868	5065868	4950812	4854954	4635057	4103180	121	361695	5065868	50.55	139373	66721	12	24	0		121	5065868	50.55	5118		4850	99.96	0.62	TRUE
562.22838	109	109	71	58	45	28	5102812	5102812	5015702	4922209	4727552	4102604	109	333687	5102812	50.42	156881	69543	12	24	0		109	5102812	50.42	5147		4854	99.96	0.08	TRUE
562.22839	75	75	49	42	36	26	5118953	5118953	5051345	5007121	4911741	4572097	75	529717	5118953	50.3	190476	111789	9	17	0		75	5118953	50.3	5077		4798	99.9	0.08	TRUE
562.2284	132	132	69	54	41	27	5241660	5241660	5081362	4975542	4780775	4277624	132	349572	5241660	50.51	172578	73470	10	22	0		132	5241660	50.51	5382		5058	99.96	0.11	TRUE
562.22841	132	132	77	61	44	29	5195794	5195794	5060275	4950639	4678544	4136101	132	378508	5195794	50.54	152516	72459	12	25	0		132	5195794	50.54	5275		4976	99.96	0.39	TRUE
562.22842	67	67	42	37	34	24	4910837	4910837	4855445	4818930	4784692	4432557	67	426529	4910837	50.71	186458	150606	9	16	0		67	4910837	50.71	4784		4551	99.96	0.45	TRUE
562.22843	104	104	66	58	46	31	4886045	4886045	4804359	4744431	4535849	3984046	104	292753	4886045	50.67	131052	64780	13	26	0		104	4886045	50.67	4883		4642	99.96	0.08	TRUE
562.22844	86	86	49	40	31	21	5062139	5062139	4988496	4930130	4776531	4431166	86	557541	5062139	50.47	192262	131063	8	15	0		86	5062139	50.47	5068		4790	99.96	0.67	TRUE
562.22845	88	88	49	42	34	24	5067764	5067764	4982087	4935601	4804747	4455150	88	486953	5067764	50.6	186574	109501	8	17	0		88	5067764	50.6	5120		4834	99.96	0.62	TRUE
562.22846	109	109	64	53	34	25	5185945	5185945	5071003	4989277	4706549	4385885	109	504022	5185945	50.45	185952	98610	9	19	0		109	5185945	50.45	5166		4875	99.96	0.08	TRUE
562.22847	152	152	108	89	54	30	5263282	5263282	5156819	5031378	4460589	3576304	152	345489	5263282	50.44	83851	41043	15	39	0		152	5263282	50.44	5247		4970	99.65	0.28	TRUE
562.22848	105	105	53	42	34	24	5092390	5092390	4975828	4902982	4773101	4436013	105	536333	5092390	50.56	185736	118482	9	17	0.02		105	5092390	50.56	5146		4908	99.65	0.49	TRUE
562.22849	69	69	45	35	28	20	4965937	4965937	4913254	4833014	4717316	4462652	69	550287	4965937	50.46	239096	130657	7	14	0		69	4965937	50.46	4889		4636	99.96	0.08	TRUE
562.2285	50	50	36	34	31	23	4722521	4722521	4693534	4674933	4626743	4354542	50	452534	4722521	50.58	234001	178813	8	14	0		50	4722521	50.58	4590		4392	99.96	0.11	TRUE
562.22851	114	114	59	46	36	26	5188236	5188236	5060929	4974070	4816641	4487892	114	536333	5188236	50.57	185736	110373	9	18	0		114	5188236	50.57	5291		5030	99.65	0.49	TRUE
562.22852	103	103	69	51	38	27	5004966	5004966	4922567	4793338	4580076	4168484	103	374488	5004966	50.64	181020	68727	11	20	0		103	5004966	50.64	4942		4686	99.96	0.08	TRUE
562.22853	81	81	54	49	35	22	5088469	5088469	5032571	5000369	4781428	4306143	81	487730	5088469	50.4	199189	131030	9	17	0		81	5088469	50.4	5064		4785	99.96	0.08	TRUE
562.22854	127	127	81	69	51	31	5188724	5188724	5087278	4996946	4676827	3990599	127	340290	5188724	50.43	148339	52416	13	30	0		127	5188724	50.43	5096		4845	99.65	0.31	TRUE
562.22855	91	91	55	45	36	24	5017417	5017417	4939399	4869903	4738631	4349549	91	430126	5017417	50.32	165660	107335	9	18	0		91	5017417	50.32	4973		4693	99.96	0.08	TRUE
562.22856	104	104	66	53	34	26	5189761	5189761	5104408	5013190	4730095	4451022	104	526760	5189761	50.41	179332	109703	10	19	0		104	5189761	50.41	5159		4865	99.96	0.64	TRUE
562.22857	86	86	55	47	32	23	4965320	4965320	4889378	4827896	4596697	4250596	86	526664	4965320	50.51	185951	109922	9	17	0		86	4965320	50.51	4881		4616	99.96	0.08	TRUE
562.22858	98	98	70	57	46	30	4947393	4947393	4892737	4797049	4622094	4022166	98	385423	4947393	50.57	137051	62987	12	25	0		98	4947393	50.57	4898		4631	99.96	0.08	TRUE
562.22859	100	100	57	46	37	27	5173839	5173839	5082079	5010392	4866168	4535230	100	484119	5173839	50.63	175903	101989	9	19	0		100	5173839	50.63	5264		4967	99.96	0.62	TRUE
562.2286	129	129	89	77	54	32	5144478	5144478	5045285	4965222	4603900	3804522	129	379878	5144478	50.54	90254	49606	14	34	0		129	5144478	50.54	5041		4795	99.96	0.31	TRUE
562.22861	76	76	52	43	34	23	5084373	5084373	5032535	4971825	4849629	4444787	76	554148	5084373	50.61	223048	118177	8	16	0		76	5084373	50.61	5065		4806	99.96	0.39	TRUE
562.22862	195	195	107	89	62	31	5149941	5149941	4934562	4809370	4363476	3179739	195	183432	5149941	50.64	80443	39253	22	47	0		195	5149941	50.64	5291		4985	99.96	0.08	TRUE
562.22863	77	77	46	42	36	28	4912084	4912084	4848480	4819439	4720010	4438198	77	466276	4912084	50.58	192188	109146	10	19	0		77	4912084	50.58	4842		4612	99.96	0.39	TRUE
562.22864	116	116	66	55	41	29	5097559	5097559	4988676	4910824	4668978	4277349	116	364147	5097559	50.6	162667	80990	11	23	0		116	5097559	50.6	5166		4884	99.96	0.62	TRUE
562.22865	102	102	63	54	44	27	4803007	4803007	4705391	4639004	4460780	3824223	102	378613	4803007	50.58	127854	63600	12	24	0		102	4803007	50.58	4843		4589	99.96	0.08	TRUE
562.22866	99	99	60	49	34	26	5127742	5127742	5045936	4965844	4724833	4440160	99	431579	5127742	50.43	196399	98548	9	19	0		99	5127742	50.43	5124		4816	99.96	0.12	TRUE
562.22867	104	104	63	54	44	27	4803651	4803651	4706372	4639417	4462188	3825265	104	378613	4803651	50.58	127774	63600	12	24	0.02		104	4803651	50.58	4854		4597	99.96	0.08	TRUE
562.22868	121	121	67	54	39	28	5168538	5168538	5047973	4951116	4724214	4360301	121	355848	5168538	50.41	179415	94850	11	21	0		121	5168538	50.41	5189		4878	99.96	0.08	TRUE
562.22869	98	98	68	62	52	31	4875446	4875446	4804216	4754251	4610839	3809544	98	359978	4875446	50.48	112433	55022	14	29	0		98	4875446	50.48	4836		4578	99.96	0.08	TRUE
562.2287	97	97	59	44	31	23	5186842	5186842	5104089	5000885	4796876	4516754	97	468603	5186842	50.47	195515	138685	9	17	0		97	5186842	50.47	5215		4915	99.96	0.76	TRUE
562.22871	162	162	78	59	39	28	5244004	5244004	5042280	4905163	4589420	4214787	162	415038	5244004	50.51	132451	69460	11	24	0		162	5244004	50.51	5317		5005	99.96	0.08	TRUE
562.22872	120	120	64	55	42	29	5113096	5113096	4987628	4925492	4751498	4300663	120	285104	5113096	50.56	172372	90398	12	23	0		120	5113096	50.56	5146		4865	99.96	0.08	TRUE
562.22873	125	125	66	51	38	25	5206516	5206516	5081676	4972640	4783873	4342717	125	484466	5206516	50.58	180607	81880	9	20	0		125	5206516	50.58	5235		4941	99.96	0.08	TRUE
562.22874	185	185	140	109	59	30	4569258	4569258	4457913	4243006	3408306	2375019	185	142800	4569258	50.82	51727	24549	29	60	0		185	4569258	50.82	4593		4364	99.96	0.62	TRUE
562.22875	148	148	91	69	54	37	5147418	5147418	5015389	4860800	4629894	3966479	148	299164	5147418	50.63	88709	53600	17	36	0		148	5147418	50.63	5229		4914	99.92	0.08	TRUE
562.22876	126	126	66	55	35	27	4904138	4904138	4766086	4691441	4368049	4089245	126	321107	4904138	50.73	153685	96477	11	22	0		126	4904138	50.73	4863		4622	99.88	0.11	TRUE
562.22877	86	86	52	43	33	24	5081788	5081788	5002494	4932642	4766777	4446112	86	477784	5081788	50.41	199227	132452	9	17	0		86	5081788	50.41	5046		4762	99.96	0.08	TRUE
562.22878	79	79	60	49	40	33	5100206	5100206	5051106	4973564	4817327	4571979	79	308622	5100206	50.67	161700	96479	13	22	0		79	5100206	50.67	5086		4838	99.96	0.08	TRUE
562.22879	94	94	71	61	44	28	5082353	5082353	5031949	4962025	4685809	4101930	94	386243	5082353	50.52	131811	72464	12	24	0		94	5082353	50.52	4986		4742	99.96	0.08	TRUE
562.2288	138	138	85	68	49	34	5274032	5274032	5149350	5038542	4729559	4160398	138	225740	5274032	50.73	106895	61246	16	31	0		138	5274032	50.73	5265		4999	99.96	0.13	TRUE
562.22881	118	118	73	61	49	29	4928770	4928770	4831601	4745004	4566891	3805464	118	401508	4928770	50.74	117947	58965	12	28	0		118	4928770	50.74	4905		4633	99.96	0.08	TRUE
562.22882	81	81	48	43	36	26	5152524	5152524	5087352	5051469	4939543	4569947	81	519964	5152524	50.48	180273	121052	9	17	0		81	5152524	50.48	5207		4925	99.96	0.62	TRUE
562.22883	43	43	33	33	30	23	4896790	4896790	4870722	4870722	4824423	4577180	43	882607	4896790	50.43	245794	162848	6	12	0		43	4896790	50.43	4831		4613	99.96	0.08	TRUE
562.22884	116	116	59	47	34	24	5099470	5099470	4963067	4867654	4666779	4327973	116	538171	5099470	50.36	179496	105117	10	19	0		116	5099470	50.36	5057		4776	99.96	0.08	TRUE
562.22885	87	87	63	55	50	30	4797567	4797567	4745070	4681040	4586499	3894385	87	498097	4797567	50.65	119108	62089	12	25	0		87	4797567	50.65	4770		4553	99.96	0.08	TRUE
562.22886	81	81	55	51	43	30	4865348	4865348	4806235	4773616	4620541	4195435	81	495116	4865348	50.6	153869	79820	11	21	0		81	4865348	50.6	4672		4465	99.96	0.08	TRUE
562.22887	79	79	51	48	41	30	4838821	4838821	4777736	4755189	4646088	4231586	79	285310	4838821	50.64	181396	88348	11	21	0		79	4838821	50.64	4804		4567	99.96	0.54	TRUE
562.22888	136	136	70	57	42	29	5232523	5232523	5095418	5002092	4761452	4339194	136	285358	5232523	50.52	154760	90412	13	24	0		136	5232523	50.52	5323		5018	99.96	0.08	TRUE
562.22889	59	59	41	36	32	23	5018373	5018373	4985218	4949833	4882618	4572541	59	518076	5018373	50.52	189453	140727	8	15	0		59	5018373	50.52	5015		4745	99.96	0.67	TRUE
562.2289	74	74	48	47	43	30	4824114	4824114	4759586	4752033	4691879	4230862	74	350785	4824114	50.71	158444	87957	11	21	0		74	4824114	50.71	4791		4576	99.96	0.12	TRUE
562.22891	99	99	59	53	37	24	5061228	5061228	4970997	4926562	4664246	4236940	99	493326	5061228	50.37	216295	96253	8	18	0		99	5061228	50.37	5032		4747	99.65	0.12	TRUE
562.22892	110	110	69	61	43	28	5249331	5249331	5139696	5081160	4789227	4238062	110	370372	5249331	50.63	163025	76539	11	23	0		110	5249331	50.63	5321		5007	99.96	0.31	TRUE
562.22893	138	138	71	57	38	28	5156343	5156343	5000876	4900723	4608571	4270586	138	494120	5156343	50.44	156244	83062	11	22	0		138	5156343	50.44	5237		4957	99.88	0.31	TRUE
562.22894	121	121	72	56	41	29	5256828	5256828	5154993	5043698	4813971	4405848	121	381771	5256828	50.25	152504	81425	10	22	0		121	5256828	50.25	5346		5017	99.96	0.08	TRUE
562.22895	102	102	68	58	49	26	4607371	4607371	4530838	4455439	4305788	3476149	102	464554	4607371	50.76	112406	50542	12	26	0		102	4607371	50.76	4543		4347	99.96	0.39	TRUE
562.22896	97	97	64	51	45	31	5270722	5270722	5194382	5106611	5011648	4513665	97	485394	5270722	50.38	152036	83034	10	23	0		97	5270722	50.38	5383		5040	99.96	0.66	TRUE
562.22897	95	95	56	49	43	28	5093637	5093637	5005636	4955949	4848288	4332593	95	451302	5093637	50.63	158185	83008	10	21	0		95	5093637	50.63	4981		4714	99.96	0.08	TRUE
562.22898	111	111	64	52	36	21	5172751	5172751	5061623	4981808	4745513	4246359	111	513857	5172751	50.46	203109	110568	9	17	0		111	5172751	50.46	5143		4868	99.96	0.08	TRUE
562.22899	101	101	65	51	38	29	5033239	5033239	4947578	4853110	4636204	4312304	101	397020	5033239	50.51	179415	84589	10	21	0		101	5033239	50.51	4992		4701	99.96	0.08	TRUE
562.229	101	101	67	58	40	28	5004995	5004995	4925018	4862801	4555940	4103795	101	471594	5004995	50.51	160822	72517	10	23	0		101	5004995	50.51	5028		4760	99.96	0.93	TRUE
562.22901	114	114	71	59	45	28	5189177	5189177	5080298	4996860	4772657	4143138	114	370101	5189177	50.59	163057	56862	11	24	0		114	5189177	50.59	5226		4943	99.96	0.31	TRUE
562.22902	122	122	82	67	45	28	5016222	5016222	4918426	4805958	4429802	3798991	122	296848	5016222	50.64	139690	50056	13	28	0		122	5016222	50.64	4990		4715	99.88	0.08	TRUE
562.22903	143	143	66	54	39	29	5011672	5011672	4840604	4748925	4517690	4167178	143	325931	5011672	50.68	149215	74129	11	22	0		143	5011672	50.68	5026		4756	99.96	0.08	TRUE
562.22904	99	99	62	50	35	24	5021325	5021325	4934516	4850422	4619762	4237295	99	577186	5021325	50.44	179332	104822	9	18	0.02		99	5021325	50.44	4946		4677	99.96	0.08	TRUE
562.22905	102	102	59	48	36	27	5129100	5129100	5020976	4937297	4755933	4444001	102	362170	5129100	50.46	185305	94850	10	20	0		102	5129100	50.46	5112		4828	99.96	0.08	TRUE
562.22906	60	60	44	38	31	21	5069479	5069479	5029294	4990510	4880872	4535716	60	458965	5069479	50.35	268876	130658	8	15	0		60	5069479	50.35	4993		4729	99.96	0.08	TRUE
562.22907	79	79	44	40	35	26	4914740	4914740	4843007	4814130	4729400	4404207	79	466275	4914740	50.59	190993	114472	10	18	0		79	4914740	50.59	4846		4614	99.96	0.39	TRUE
562.22908	135	135	69	58	41	29	4813787	4813787	4681224	4607240	4294294	3859507	135	286063	4813787	50.73	135622	68937	13	25	0		135	4813787	50.73	4815		4567	99.96	0.13	TRUE
562.22909	50	50	33	31	30	22	4681886	4681886	4640526	4629090	4614579	4344580	50	530754	4681886	50.75	195922	144066	7	14	0		50	4681886	50.75	4549		4354	99.96	0.08	TRUE
562.2291	66	66	45	39	33	22	5183329	5183329	5133365	5092927	5008856	4613900	66	520120	5183329	50.38	203757	132637	8	15	0		66	5183329	50.38	5227		4923	99.96	0.62	TRUE
562.22911	104	104	62	49	37	29	5021808	5021808	4919949	4827486	4641682	4365389	104	401991	5021808	50.52	185303	98725	10	21	0		104	5021808	50.52	4969		4689	99.96	0.08	TRUE
562.22912	85	85	50	40	34	22	4965816	4965816	4894230	4833329	4741626	4348857	85	382762	4965816	50.5	192548	130659	9	16	0.02		85	4965816	50.5	4898		4651	99.96	0.08	TRUE
562.22913	87	87	51	47	43	29	4963865	4963865	4891939	4862316	4771155	4292412	87	451316	4963865	50.55	157473	76322	10	21	0		87	4963865	50.55	4819		4582	99.96	0.08	TRUE
562.22914	98	98	59	48	31	24	5146383	5146383	5050344	4970768	4697142	4437803	98	414664	5146383	50.39	185952	114523	9	18	0		98	5146383	50.39	5111		4791	99.96	0.08	TRUE
562.22915	93	93	55	48	34	23	5111985	5111985	5026984	4982631	4784672	4408647	93	473368	5111985	50.43	201104	118051	9	16	0		93	5111985	50.43	5084		4825	99.96	0.08	TRUE
562.22916	131	131	66	53	36	27	5057687	5057687	4909316	4811836	4550815	4261081	131	538171	5057687	50.35	173723	94840	11	21	0		131	5057687	50.35	5020		4735	99.96	0.08	TRUE
562.22917	95	95	58	48	40	27	5124398	5124398	5047823	4975174	4832424	4369054	95	479889	5124398	50.51	162750	88114	9	19	0		95	5124398	50.51	5165		4908	99.96	0.08	TRUE
562.22918	106	106	62	56	45	30	5163116	5163116	5066295	5026401	4835856	4297103	106	368847	5163116	50.75	158185	72077	11	24	0		106	5163116	50.75	5082		4803	99.96	0.08	TRUE
562.22919	147	147	62	51	39	27	5200605	5200605	5023483	4950164	4765734	4383843	147	486953	5200605	50.55	162519	87914	10	20	0		147	5200605	50.55	5313		5023	99.88	0.62	TRUE
562.2292	86	86	56	50	45	32	5015121	5015121	4954144	4910115	4816961	4349266	86	447976	5015121	50.61	136599	76322	11	23	0		86	5015121	50.61	4878		4620	99.65	0.08	TRUE
562.22921	85	85	58	53	43	27	4698066	4698066	4641049	4603688	4454363	3866504	85	459206	4698066	50.69	129293	66565	10	22	0		85	4698066	50.69	4682		4456	99.96	0.08	TRUE
562.22922	107	107	61	48	35	27	5146408	5146408	5040655	4947578	4759051	4493452	107	359000	5146408	50.45	182538	104912	10	19	0		107	5146408	50.45	5149		4867	99.96	0.08	TRUE
562.22923	87	87	55	49	41	23	5125048	5125048	5052993	5013456	4904450	4293846	87	500462	5125048	50.37	192538	106319	9	18	0		87	5125048	50.37	5047		4774	99.96	0.31	TRUE
562.22924	124	124	65	47	34	26	5160073	5160073	5027361	4889345	4685453	4421570	124	448991	5160073	50.47	186697	104988	9	18	0		124	5160073	50.47	5160		4863	99.96	0.08	TRUE
562.22925	71	71	44	41	34	21	5163024	5163024	5104219	5086512	4979370	4523855	71	643066	5163024	50.42	274679	103361	7	13	0		71	5163024	50.42	5207		4926	99.88	0.12	TRUE
562.22926	96	96	43	39	35	26	5139925	5139925	5036516	5001016	4920912	4592996	96	539677	5139925	50.6	202913	113060	9	17	0		96	5139925	50.6	5197		4921	99.96	0.75	TRUE
562.22927	149	149	78	66	44	26	5030040	5030040	4867377	4782815	4394413	3739522	149	296850	5030040	50.55	131774	49425	13	27	0		149	5030040	50.55	5058		4800	99.88	0.08	TRUE
562.22928	90	90	58	53	42	28	5111423	5111423	5043225	5006498	4825135	4367383	90	484366	5111423	50.57	130870	73226	9	21	0		90	5111423	50.57	5121		4848	99.96	0.08	TRUE
562.22929	100	100	66	54	42	30	5069269	5069269	4990229	4902272	4704417	4287231	100	418277	5069269	50.53	153312	77657	12	23	0		100	5069269	50.53	4994		4754	99.96	0.13	TRUE
562.2293	95	95	60	52	43	31	4794478	4794478	4714188	4656514	4480129	4033092	95	268614	4794478	50.74	148890	68975	13	24	0		95	4794478	50.74	4709		4520	99.96	0.08	TRUE
562.22931	145	145	65	54	42	25	5214516	5214516	5036593	4961582	4787205	4194115	145	431501	5214516	50.54	172965	73862	11	21	0		145	5214516	50.54	5268		4957	99.88	0.08	TRUE
562.22932	104	104	61	50	35	23	5232828	5232828	5135898	5054011	4834315	4446182	104	532572	5232828	50.41	191038	120874	9	17	0		104	5232828	50.41	5258		4964	99.96	0.08	TRUE
562.22933	149	149	109	90	56	28	5265984	5265984	5168548	5041335	4493606	3490674	149	345487	5265984	50.44	83851	38859	15	39	0		149	5265984	50.44	5265		4983	99.96	0.28	TRUE
562.22934	126	126	75	62	48	30	5132815	5132815	5030955	4944345	4707864	4043981	126	345946	5132815	50.55	130602	60018	13	27	0		126	5132815	50.55	5166		4880	99.96	0.39	TRUE
562.22935	75	75	44	34	29	21	4976732	4976732	4901006	4825253	4745941	4466070	75	383399	4976732	50.54	268457	151949	8	14	0		75	4976732	50.54	4907		4667	99.96	0.08	TRUE
562.22936	148	148	104	91	59	31	5068561	5068561	4964975	4866717	4349450	3352917	148	298379	5068561	50.44	78312	37532	18	42	0		148	5068561	50.44	5069		4804	99.96	0.58	TRUE
562.22937	71	71	48	45	38	29	4620911	4620911	4571946	4550768	4435997	4113945	71	288190	4620911	50.77	160354	92479	11	20	0.04		71	4620911	50.77	4543		4330	99.96	0.08	TRUE
562.22938	33	33	26	25	24	17	4857082	4857082	4844346	4834983	4815232	4555295	33	705124	4857082	50.54	345280	189394	5	10	0		33	4857082	50.54	4762		4532	99.96	0.08	TRUE
562.22939	124	124	74	67	44	29	5152733	5152733	5026942	4971202	4591345	4061893	124	374512	5152733	50.72	152516	58888	11	26	0		124	5152733	50.72	5164		4884	99.96	0.08	TRUE
562.2294	111	111	58	46	35	25	5033079	5033079	4923772	4834624	4659024	4337786	111	359076	5033079	50.44	182538	110547	10	19	0		111	5033079	50.44	4988		4718	99.96	0.08	TRUE
562.22941	121	121	65	53	34	26	5147310	5147310	5013029	4932394	4637774	4351353	121	525737	5147310	50.5	185947	91897	9	19	0		121	5147310	50.5	5113		4844	99.96	0.13	TRUE
562.22942	104	104	62	57	45	31	5171594	5171594	5081552	5049663	4841585	4333619	104	451301	5171594	50.64	134250	72069	11	24	0		104	5171594	50.64	5127		4849	99.96	0.08	TRUE
562.22943	102	102	55	46	32	21	5000233	5000233	4898977	4832023	4618045	4227017	102	521406	5000233	50.53	202447	106862	8	16	0		102	5000233	50.53	4939		4663	99.86	0.13	TRUE
562.22944	106	106	67	58	38	27	5063184	5063184	4964079	4904240	4571283	4201717	106	402107	5063184	50.42	179396	84927	10	21	0		106	5063184	50.42	5011		4731	99.96	0.08	TRUE
562.22945	76	76	40	37	33	23	4967187	4967187	4893252	4873715	4824438	4486806	76	527819	4967187	50.51	259882	114147	7	14	0		76	4967187	50.51	4984		4760	99.96	0.39	TRUE
562.22946	99	99	61	58	44	28	5206573	5206573	5122420	5098209	4885655	4322664	99	515236	5206573	50.44	151256	94475	10	22	0		99	5206573	50.44	5206		4925	99.88	0.39	TRUE
562.22947	182	182	86	66	52	36	5151295	5151295	4935788	4802029	4602036	4040556	182	274786	5151295	50.59	103272	55243	18	33	0		182	5151295	50.59	5344		5038	99.96	0.31	TRUE
562.22948	80	80	53	42	33	21	5127692	5127692	5067951	4989000	4857758	4431828	80	519978	5127692	50.53	189310	130948	8	16	0		80	5127692	50.53	5153		4889	99.96	0.62	TRUE
562.22949	114	114	64	49	35	23	5121443	5121443	5007109	4895557	4680978	4278900	114	525736	5121443	50.44	185580	104950	9	18	0		114	5121443	50.44	5099		4815	99.96	0.08	TRUE
562.2295	149	149	93	77	55	32	4974905	4974905	4851378	4745318	4373118	3535134	149	282436	4974905	50.57	89674	43347	17	37	0		149	4974905	50.57	5049		4797	100	0.31	TRUE
562.22951	221	221	141	107	68	30	5093082	5093082	4921242	4684294	4053603	2670433	221	226183	5093082	50.52	51627	30251	28	60	0		221	5093082	50.52	5221		4948	99.34	0.75	TRUE
562.22952	76	76	48	44	33	26	5079685	5079685	5014662	4982383	4791827	4537613	76	518387	5079685	50.46	198955	110561	9	17	0		76	5079685	50.46	5037		4785	99.96	0.89	TRUE
562.22953	66	66	41	39	33	23	5087892	5087892	5030998	5020631	4919589	4574254	66	931135	5087892	50.36	200823	138900	8	15	0		66	5087892	50.36	5076		4806	99.96	0.39	TRUE
562.22954	108	108	79	65	50	33	5069778	5069778	5009303	4912663	4665286	4075870	108	310374	5069778	50.54	137349	56883	14	29	0		108	5069778	50.54	4995		4721	99.96	0.36	TRUE
562.22955	216	216	133	109	65	31	5049459	5049459	4852070	4682574	3950745	2700730	216	226175	5049459	50.56	51200	29652	28	60	0		216	5049459	50.56	5110		4846	99.34	0.62	TRUE
562.22956	124	124	86	76	54	31	5134638	5134638	5052031	4985293	4609482	3726492	124	286480	5134638	50.46	107304	47966	16	34	0		124	5134638	50.46	5187		4916	99.96	0.36	TRUE
562.22957	97	97	63	48	33	20	5093530	5093530	5014644	4900242	4676828	4227184	97	525733	5093530	50.45	254855	113067	7	15	0		97	5093530	50.45	5023		4745	99.96	0.08	TRUE
562.22958	110	110	69	58	42	28	5087434	5087434	4984003	4910370	4665745	4138137	110	338426	5087434	50.56	157969	71341	12	23	0		110	5087434	50.56	5133		4854	99.96	0.62	TRUE
562.22959	98	98	58	49	35	26	5012563	5012563	4919386	4857984	4628534	4316339	98	504539	5012563	50.45	175160	98473	9	19	0		98	5012563	50.45	4946		4671	99.96	0.08	TRUE
562.2296	90	90	59	51	39	29	5203703	5203703	5140107	5083240	4907101	4562249	90	342380	5203703	50.63	180445	106034	12	20	0		90	5203703	50.63	5260		4988	99.96	0.44	TRUE
562.22961	120	120	65	49	38	26	5133404	5133404	5012767	4894211	4724219	4288531	120	526826	5133404	50.44	179416	94838	10	20	0		120	5133404	50.44	5105		4829	99.96	0.08	TRUE
562.22962	118	118	86	78	63	37	4945955	4945955	4871970	4807295	4531590	3603904	118	232907	4945955	50.5	77704	46454	20	40	0		118	4945955	50.5	5046		4802	99.96	0.39	TRUE
562.22963	194	194	130	104	64	31	5040953	5040953	4877095	4689980	4037071	2869524	194	216230	5040953	50.6	58217	31450	25	56	0		194	5040953	50.6	5088		4831	99.34	0.62	TRUE
562.22964	90	90	65	56	43	30	5029486	5029486	4970720	4906297	4698288	4261722	90	346520	5029486	50.59	158484	71315	11	23	0		90	5029486	50.59	4948		4691	99.96	0.08	TRUE
562.22965	108	108	64	52	37	23	5124605	5124605	5021932	4931687	4708078	4234557	108	525640	5124605	50.45	182622	105118	10	19	0		108	5124605	50.45	5098		4797	99.96	0.08	TRUE
562.22966	139	139	77	64	51	31	5149499	5149499	5023572	4933977	4727944	4028187	139	342849	5149499	50.55	123218	55415	13	28	0.02		139	5149499	50.55	5135		4857	99.96	0.62	TRUE
562.22967	108	108	65	54	33	24	5157358	5157358	5055509	4968688	4639914	4305483	108	526766	5157358	50.39	185952	91542	9	19	0		108	5157358	50.39	5133		4823	99.96	0.08	TRUE
562.22968	118	118	68	50	34	23	5135674	5135674	5017486	4882353	4641219	4275146	118	525736	5135674	50.45	186498	110588	9	18	0		118	5135674	50.45	5118		4823	99.96	0.08	TRUE
562.22969	107	107	65	55	38	23	4975553	4975553	4871245	4803691	4537622	4047207	107	522577	4975553	50.58	174310	80292	9	19	0		107	4975553	50.58	4976		4698	99.88	0.08	TRUE
562.2297	124	124	93	76	56	35	5109889	5109889	5033890	4917696	4592528	3886261	124	220945	5109889	50.69	110769	52437	17	34	0		124	5109889	50.69	5044		4770	99.96	0.62	TRUE
562.22971	87	87	55	46	43	27	4868285	4868285	4791198	4724696	4677339	4090196	87	426524	4868285	50.7	171284	75217	10	21	0		87	4868285	50.7	4790		4538	99.96	0.08	TRUE
562.22972	102	102	56	52	39	29	5061041	5061041	4970744	4939200	4718447	4360941	102	348973	5061041	50.63	149215	97770	11	21	0		102	5061041	50.63	5063		4785	99.96	0.58	TRUE
562.22973	89	89	59	47	34	24	5078354	5078354	5014174	4922978	4723304	4393910	89	467592	5078354	50.43	186517	114420	9	17	0		89	5078354	50.43	5037		4747	99.96	0.23	TRUE
562.22974	107	107	57	47	34	25	4977182	4977182	4867101	4798650	4589401	4287956	107	410678	4977182	50.43	186519	95837	9	18	0		107	4977182	50.43	4934		4671	99.96	0.08	TRUE
562.22975	91	91	56	48	33	24	4974674	4974674	4889251	4829057	4592632	4284993	91	526765	4974674	50.49	185841	104935	9	18	0		91	4974674	50.49	4869		4612	99.96	0.08	TRUE
562.22976	124	124	81	66	47	32	4988488	4988488	4895737	4781297	4457168	3918569	124	299472	4988488	50.75	129482	54751	14	29	0		124	4988488	50.75	4956		4687	99.96	0.39	TRUE
562.22977	103	103	51	41	34	26	5092913	5092913	4978794	4914220	4802584	4527775	103	525695	5092913	50.54	186027	108133	9	18	0		103	5092913	50.54	5139		4855	99.96	0.62	TRUE
562.22978	103	103	66	53	36	26	5111217	5111217	5019400	4928393	4651982	4317877	103	467565	5111217	50.51	185567	94518	9	19	0		103	5111217	50.51	5032		4761	99.96	0.08	TRUE
562.22979	119	119	65	50	33	24	5320011	5320011	5177032	5062269	4776260	4447288	119	536268	5320011	50.25	186496	104995	9	19	0		119	5320011	50.25	5322		4978	99.96	0.12	TRUE
562.2298	74	74	43	36	32	22	4893431	4893431	4829885	4778948	4722453	4366063	74	526217	4893431	50.64	187370	129027	8	15	0		74	4893431	50.64	4774		4566	99.96	0.08	TRUE
562.22981	56	56	32	30	28	21	4805452	4805452	4747398	4736759	4714181	4450109	56	502373	4805452	50.55	266790	160077	6	12	0		56	4805452	50.55	4749		4539	99.96	0.08	TRUE
562.22982	108	108	65	55	43	28	5259965	5259965	5162620	5093318	4884236	4357192	108	410242	5259965	50.4	150704	75386	10	22	0.02		108	5259965	50.4	5336		5015	99.96	0.08	TRUE
562.22983	86	86	56	47	35	25	4994613	4994613	4915524	4847916	4650220	4297399	86	401992	4994613	50.53	195604	109289	9	18	0		86	4994613	50.53	4901		4631	99.96	0.08	TRUE
562.22984	158	158	81	68	44	27	5121987	5121987	4920643	4833525	4426269	3740181	158	362467	5121987	50.43	133302	47541	12	30	0		158	5121987	50.43	5207		4932	99.96	0.11	TRUE
562.22985	156	156	82	68	49	28	5258268	5258268	5086512	4980545	4645738	3927759	156	343566	5258268	50.44	130210	49698	13	29	0		156	5258268	50.44	5310		5021	99.96	0.08	TRUE
562.22986	99	99	65	53	37	24	5123742	5123742	5048904	4958712	4713309	4292827	99	525737	5123742	50.44	179352	113067	10	19	0		99	5123742	50.44	5086		4796	99.96	0.08	TRUE
562.22987	88	88	47	37	28	22	5038524	5038524	4955553	4882908	4758773	4540368	88	541344	5038524	50.58	198576	149548	8	15	0		88	5038524	50.58	5005		4745	99.96	0.08	TRUE
562.22988	105	105	64	54	45	26	4689631	4689631	4606562	4535819	4374740	3668278	105	333816	4689631	50.75	131938	75786	12	24	0		105	4689631	50.75	4579		4393	99.96	0.08	TRUE
562.22989	85	85	65	57	47	37	5025665	5025665	4984061	4922399	4758017	4421833	85	418279	5025665	50.63	114307	75711	13	27	0		85	5025665	50.63	4938		4704	99.96	0.13	TRUE
562.2299	75	75	47	41	29	21	4949036	4949036	4889679	4841596	4632259	4338531	75	578206	4949036	50.56	242699	160319	8	14	0		75	4949036	50.56	4920		4648	99.96	0.39	TRUE
562.22991	199	199	123	100	64	30	5121808	5121808	4924061	4762153	4180102	2913684	199	226175	5121808	50.6	58217	34283	24	53	0		199	5121808	50.6	5167		4886	99.34	0.62	TRUE
562.22992	170	170	110	94	61	35	5182498	5182498	5041592	4929377	4348513	3416386	170	220180	5182498	50.52	72382	39964	22	46	0		170	5182498	50.52	5274		4994	99.96	0.23	TRUE
562.22993	50	50	31	29	27	20	4732208	4732208	4679167	4665843	4644775	4388113	50	502534	4732208	50.61	266790	160077	6	12	0		50	4732208	50.61	4617		4435	99.96	0.08	TRUE
562.22994	53	53	41	38	35	25	4929605	4929605	4903466	4882918	4837322	4495683	53	469974	4929605	50.69	198576	121664	9	16	0		53	4929605	50.69	4798		4594	99.96	0.08	TRUE
562.22995	83	83	52	47	33	23	5014585	5014585	4948406	4912176	4685504	4336878	83	493425	5014585	50.48	239138	101842	8	16	0		83	5014585	50.48	4954		4679	99.96	0.12	TRUE
562.22996	65	65	43	39	34	26	4921446	4921446	4871323	4843362	4754614	4457662	65	357845	4921446	50.7	201679	119883	9	17	0		65	4921446	50.7	4767		4563	99.96	0.08	TRUE
562.22997	147	147	92	75	55	30	5277487	5277487	5144041	5015497	4691417	3794107	147	379526	5277487	50.51	90142	43778	14	34	0		147	5277487	50.51	5231		4969	99.96	0.08	TRUE
562.22998	66	66	49	42	33	24	5127247	5127247	5086786	5042365	4892665	4566775	66	518943	5127247	50.55	189509	124418	8	16	0		66	5127247	50.55	5130		4833	99.96	0.62	TRUE
562.22999	125	125	76	63	45	26	5211799	5211799	5092220	4996092	4709892	3998337	125	437399	5211799	50.46	138236	55143	13	25	0		125	5211799	50.46	5308		5001	99.88	0.08	TRUE
562.23	118	118	57	48	34	25	5009375	5009375	4865327	4806920	4568677	4253610	118	458143	5009375	50.49	179496	106098	10	20	0		118	5009375	50.49	4946		4679	99.96	0.08	TRUE
562.23001	97	97	55	48	39	26	5170646	5170646	5054363	5004856	4875719	4428350	97	518105	5170646	50.41	204705	76777	8	18	0		97	5170646	50.41	5161		4856	99.96	0.08	TRUE
562.23002	116	116	59	45	36	27	5133569	5133569	5012469	4915773	4763711	4452742	116	486954	5133569	50.62	185986	93522	9	19	0		116	5133569	50.62	5196		4912	99.96	0.62	TRUE
562.23003	79	79	42	35	30	25	5013492	5013492	4930543	4882087	4802748	4624753	79	523102	5013492	50.53	185584	118756	8	16	0		79	5013492	50.53	4941		4708	99.96	0.08	TRUE
562.23004	163	163	92	78	51	30	5062275	5062275	4897605	4809525	4357494	3583901	163	300997	5062275	50.74	105998	42330	16	35	0		163	5062275	50.74	5115		4826	99.96	0.31	TRUE
562.23005	151	151	101	81	54	29	5433684	5433684	5317865	5180329	4729244	3807118	151	352113	5433684	50.57	119297	45796	15	35	0.04		151	5433684	50.57	5468		5161	99.96	0.71	TRUE
562.23006	104	104	74	63	51	30	4767307	4767307	4694018	4618288	4402525	3653022	104	275581	4767307	50.73	130795	55177	15	29	0		104	4767307	50.73	4708		4485	99.96	0.08	TRUE
562.23007	73	73	50	45	34	23	5163749	5163749	5114295	5075757	4902639	4489997	73	518915	5163749	50.51	189195	113141	8	17	0		73	5163749	50.51	5191		4892	99.96	0.62	TRUE
562.23008	89	89	54	45	35	24	5066738	5066738	4991507	4932689	4795315	4424400	89	518670	5066738	50.54	189623	118633	9	17	0.04		89	5066738	50.54	5018		4767	99.96	0.08	TRUE
562.23009	157	157	76	63	46	32	5048748	5048748	4860780	4770774	4501523	4034011	157	326240	5048748	50.51	118644	68405	14	28	0		157	5048748	50.51	5054		4788	99.96	0.08	TRUE
562.2301	95	95	54	40	32	22	5109485	5109485	5014866	4905157	4771765	4412911	95	450028	5109485	50.48	202447	125926	8	16	0		95	5109485	50.48	5073		4803	99.96	0.08	TRUE
562.23011	116	116	69	54	38	27	5216414	5216414	5098480	4981298	4731653	4371078	116	359076	5216414	50.42	172731	94840	11	21	0.02		116	5216414	50.42	5263		4960	99.96	0.08	TRUE
562.23012	159	159	102	83	55	26	5196566	5196566	5068464	4939800	4457788	3392179	159	315057	5196566	50.44	105596	40759	17	38	0		159	5196566	50.44	5262		4993	99.96	0.39	TRUE
562.23013	142	142	93	81	54	29	5146904	5146904	5030846	4947519	4500664	3627909	142	315057	5146904	50.62	110931	40941	16	35	0		142	5146904	50.62	5178		4907	99.96	0.69	TRUE
562.23014	88	88	57	51	44	32	4835095	4835095	4773403	4722460	4600307	4168937	88	498255	4835095	50.8	130974	69147	11	23	0		88	4835095	50.8	4799		4556	99.96	0.08	TRUE
562.23015	83	83	56	46	37	25	5136386	5136386	5079038	5005154	4862744	4468577	83	498057	5136386	50.58	189453	110495	8	17	0		83	5136386	50.58	5133		4862	99.88	0.08	TRUE
562.23016	102	102	52	45	33	25	5090560	5090560	4978393	4930270	4725715	4428748	102	481410	5090560	50.33	194046	113068	9	17	0		102	5090560	50.33	5055		4791	99.96	0.08	TRUE
562.23017	170	170	104	91	60	30	5147013	5147013	4993570	4906730	4417880	3360999	170	295541	5147013	50.41	86224	36106	19	42	0		170	5147013	50.41	5220		4956	99.96	0.39	TRUE
562.23018	99	99	63	54	35	26	5131910	5131910	5053256	4989986	4666281	4310594	99	433456	5131910	50.82	181785	87088	11	20	0		99	5131910	50.82	5161		4869	99.96	0.08	TRUE
562.23019	76	76	46	40	32	20	5022953	5022953	4955197	4915038	4785245	4367533	76	555772	5022953	50.49	251298	133305	7	14	0		76	5022953	50.49	5020		4765	99.88	0.08	TRUE
562.2302	139	139	76	58	43	30	5189569	5189569	5057559	4929206	4691526	4230042	139	355337	5189569	50.44	162085	69097	12	25	0		139	5189569	50.44	5217		4924	99.96	0.08	TRUE
562.23021	163	163	90	77	55	28	5051606	5051606	4867180	4780070	4437017	3441928	163	343631	5051606	50.47	108932	44131	16	36	0		163	5051606	50.47	5072		4813	99.96	0.08	TRUE
562.23022	80	80	50	45	36	22	5013337	5013337	4947096	4913117	4763191	4250021	80	662571	5013337	50.51	187008	106193	8	17	0		80	5013337	50.51	5019		4777	99.96	0.39	TRUE
562.23023	70	70	50	42	33	23	4771663	4771663	4727645	4674509	4521392	4171492	70	452111	4771663	50.71	181969	131287	10	17	0		70	4771663	50.71	4650		4415	99.96	0.11	TRUE
562.23024	156	156	104	83	60	32	4813287	4813287	4683053	4526470	4115216	3093808	156	209072	4813287	50.71	72924	39056	22	44	0		156	4813287	50.71	4790		4570	99.96	0.08	TRUE
562.23025	90	90	58	53	36	26	4840854	4840854	4758958	4725546	4456201	4102997	90	328379	4840854	50.66	178653	84560	11	20	0		90	4840854	50.66	4721		4487	99.96	0.08	TRUE
562.23026	88	88	46	40	29	23	4915932	4915932	4811038	4771693	4616556	4412315	88	497508	4915932	50.51	296657	102645	7	15	0		88	4915932	50.51	4924		4673	99.88	0.08	TRUE
562.23027	116	116	62	51	39	27	5161313	5161313	5053851	4973726	4793692	4382072	116	387372	5161313	50.27	165660	100228	10	21	0		116	5161313	50.27	5189		4880	99.96	0.08	TRUE
562.23028	109	109	61	52	37	28	5131428	5131428	5025840	4967103	4721203	4389324	109	346383	5131428	50.78	165175	96500	12	22	0		109	5131428	50.78	5139		4872	99.96	0.08	TRUE
562.23029	81	81	53	48	44	31	5006971	5006971	4945239	4913216	4843465	4373063	81	451301	5006971	50.65	147148	81822	11	21	0.02		81	5006971	50.65	4871		4624	99.96	0.08	TRUE
562.2303	116	116	72	61	42	27	5258398	5258398	5149240	5076581	4795357	4263908	116	311141	5258398	50.47	182417	89985	12	22	0		116	5258398	50.47	5330		5030	99.96	0.08	TRUE
562.23031	128	128	78	62	45	28	5098739	5098739	4981889	4869841	4579191	3948756	128	437401	5098739	50.57	132658	61672	12	26	0		128	5098739	50.57	5162		4862	99.88	0.08	TRUE
562.23032	97	97	59	56	41	33	5052797	5052797	4954740	4936108	4696208	4419125	97	358018	5052797	50.7	130065	78717	12	24	0		97	5052797	50.7	5065		4815	99.96	0.08	TRUE
562.23033	90	90	52	43	33	24	4932432	4932432	4841568	4774076	4619792	4300049	90	377201	4932432	50.49	202447	105025	8	16	0		90	4932432	50.49	4861		4599	99.96	0.08	TRUE
562.23034	100	100	58	46	37	26	5058246	5058246	4965406	4884195	4727824	4359678	100	430189	5058246	50.29	165660	103593	10	19	0		100	5058246	50.29	5004		4729	99.96	0.08	TRUE
562.23035	82	82	56	48	34	24	4808023	4808023	4737231	4687322	4460692	4083891	82	708432	4808023	50.57	151914	100680	8	17	0		82	4808023	50.57	4689		4457	99.96	0.11	TRUE
562.23036	86	86	58	48	35	25	4800345	4800345	4722890	4657781	4460684	4084409	86	520723	4800345	50.57	151914	100680	9	18	0		86	4800345	50.57	4680		4450	99.96	0.11	TRUE
562.23037	108	108	64	55	34	26	4993276	4993276	4880327	4821960	4513995	4246224	108	354540	4993276	50.43	179298	98725	11	20	0		108	4993276	50.43	4929		4662	99.96	0.08	TRUE
562.23038	143	143	76	56	40	28	5146329	5146329	4991499	4848809	4606641	4200395	143	431073	5146329	50.51	170020	69097	10	22	0		143	5146329	50.51	5154		4879	99.96	0.08	TRUE
562.23039	97	97	52	47	35	24	5148977	5148977	5024757	4991976	4815058	4431176	97	529693	5148977	50.39	204696	101672	8	17	0		97	5148977	50.39	5132		4829	99.96	0.08	TRUE
562.2304	110	110	74	62	43	31	5143735	5143735	5063346	4981435	4731844	4314227	110	256137	5143735	50.52	131005	101195	15	26	0		110	5143735	50.52	5143		4871	99.96	0.08	TRUE
562.23041	98	98	63	46	33	20	5120789	5120789	5036775	4908354	4694574	4284929	98	525736	5120789	50.49	214432	113067	8	15	0		98	5120789	50.49	5060		4786	99.96	0.08	TRUE
562.23042	59	59	42	38	35	24	4591907	4591907	4557279	4527141	4458172	4074434	59	501434	4591907	50.8	183088	112496	9	16	0		59	4591907	50.8	4455		4268	99.96	0.08	TRUE
562.23043	102	102	72	64	45	31	5043690	5043690	4980494	4921331	4618369	4077062	102	340431	5043690	50.25	118646	77166	13	26	0		102	5043690	50.25	5034		4735	99.96	0.12	TRUE
562.23044	96	96	71	65	53	30	4670724	4670724	4612464	4565839	4363669	3496534	96	293436	4670724	50.71	96050	49812	15	31	0		96	4670724	50.71	4559		4362	99.96	0.58	TRUE
562.23045	66	66	43	39	33	25	5029863	5029863	4970661	4943258	4849098	4571400	66	497135	5029863	50.39	189090	113906	9	17	0		66	5029863	50.39	4941		4696	99.96	0.08	TRUE
562.23046	107	107	71	62	42	27	5000814	5000814	4919957	4859012	4513338	3959471	107	334288	5000814	50.43	146231	59885	11	24	0		107	5000814	50.43	5044		4783	99.88	0.08	TRUE
562.23047	137	137	77	66	50	31	4947858	4947858	4819027	4744825	4501063	3753649	137	440599	4947858	50.63	97972	52435	13	31	0		137	4947858	50.63	5004		4722	99.96	0.93	TRUE
562.23048	78	78	55	47	33	22	5203945	5203945	5152359	5096802	4882655	4473707	78	519978	5203945	50.49	192384	121069	8	16	0		78	5203945	50.49	5248		4938	99.96	0.62	TRUE
562.23049	176	176	107	88	63	33	5209973	5209973	5046425	4907181	4466128	3370622	176	265598	5209973	50.61	68835	38518	20	46	0		176	5209973	50.61	5246		4974	99.96	0.31	TRUE
562.2305	105	105	63	46	35	26	5009683	5009683	4900397	4777463	4615427	4331820	105	385125	5009683	50.51	179496	104945	10	19	0		105	5009683	50.51	4968		4700	99.96	0.08	TRUE
562.23051	109	109	57	45	34	21	5169138	5169138	5054292	4969302	4799403	4356952	109	558697	5169138	50.45	203107	127763	8	16	0		109	5169138	50.45	5185		4909	99.96	0.08	TRUE
562.23052	153	153	94	81	54	33	5345252	5345252	5209005	5123022	4639135	3860011	153	341825	5345252	50.51	87698	45233	16	37	0		153	5345252	50.51	5338		5073	99.96	0.08	TRUE
562.23053	98	98	59	50	35	26	5088013	5088013	5004081	4941692	4682382	4343607	98	424722	5088013	50.73	178680	109366	11	20	0		98	5088013	50.73	5086		4832	99.96	0.08	TRUE
562.23054	139	139	79	59	47	31	4840800	4840800	4708759	4568910	4397534	3868410	139	270393	4840800	50.81	119735	60932	14	27	0		139	4840800	50.81	4810		4574	99.65	0.08	TRUE
562.23055	127	127	84	70	48	30	5021592	5021592	4921904	4826230	4492662	3865357	127	343989	5021592	50.56	117949	56825	15	29	0		127	5021592	50.56	4995		4751	98.73	0.08	TRUE
562.23056	43	43	32	31	29	21	4754978	4754978	4722616	4717311	4685734	4391970	43	541650	4754978	50.61	259321	149107	7	14	0		43	4754978	50.61	4638		4440	99.96	0.08	TRUE
562.23057	110	110	69	61	47	31	5072041	5072041	4984359	4921863	4711539	4132211	110	342913	5072041	50.5	123215	59735	13	25	0		110	5072041	50.5	5038		4771	99.96	0.62	TRUE
562.23058	115	115	75	60	46	29	5208000	5208000	5121745	5019165	4776317	4182042	115	395995	5208000	50.71	153484	66840	12	25	0		115	5208000	50.71	5192		4930	99.96	0.13	TRUE
562.23059	93	93	60	53	38	26	5005381	5005381	4938670	4888107	4645351	4227100	93	493425	5005381	50.39	168580	96891	9	20	0		93	5005381	50.39	4950		4681	99.96	0.12	TRUE
562.2306	116	116	77	60	46	31	5205745	5205745	5120896	5002569	4759777	4228648	116	395995	5205745	50.71	146489	64213	12	26	0		116	5205745	50.71	5199		4926	99.96	0.13	TRUE
562.23061	78	78	55	48	34	26	5144174	5144174	5089897	5042823	4813194	4520715	78	433327	5144174	50.8	181738	112271	11	19	0		78	5144174	50.8	5162		4885	99.96	0.08	TRUE
562.23062	85	85	48	42	31	21	5097590	5097590	5023151	4976412	4803140	4440795	85	519978	5097590	50.44	203864	122877	7	15	0		85	5097590	50.44	5117		4829	99.96	0.62	TRUE
562.23063	100	100	65	55	42	28	5045883	5045883	4973897	4904008	4680039	4187300	100	338480	5045883	50.72	181712	67535	10	22	0		100	5045883	50.72	5037		4767	99.96	0.89	TRUE
562.23064	138	138	82	67	46	30	5214036	5214036	5104729	4995697	4634736	4043514	138	326523	5214036	50.67	127647	54414	13	28	0		138	5214036	50.67	5298		5004	99.96	0.39	TRUE
562.23065	89	89	64	54	35	26	5160479	5160479	5102763	5029213	4714557	4363673	89	444116	5160479	50.79	180447	106034	10	20	0		89	5160479	50.79	5186		4906	99.96	0.08	TRUE
562.23066	78	78	53	47	36	27	5141273	5141273	5073667	5027350	4841420	4517653	78	319453	5141273	50.72	181766	109372	11	20	0		78	5141273	50.72	5120		4875	99.96	0.58	TRUE
562.23067	189	189	111	93	67	35	5376764	5376764	5195794	5061691	4595190	3463629	189	265514	5376764	50.56	63363	35856	22	49	0		189	5376764	50.56	5480		5182	99.96	0.31	TRUE
562.23068	71	71	58	50	39	32	5119298	5119298	5091487	5039097	4845519	4597672	71	308622	5119298	50.65	173539	96479	12	22	0		71	5119298	50.65	5109		4847	99.96	0.08	TRUE
562.23069	95	95	60	49	33	25	5008525	5008525	4919274	4830043	4566798	4307704	95	525632	5008525	50.45	169140	108016	10	20	0		95	5008525	50.45	4940		4666	99.96	0.08	TRUE
562.2307	114	114	69	55	36	22	5172827	5172827	5066633	4972288	4694489	4237719	114	513857	5172827	50.45	203109	110554	9	18	0		114	5172827	50.45	5155		4863	99.96	0.08	TRUE
562.23071	101	101	62	47	34	22	5080217	5080217	4991684	4877371	4664586	4260001	101	525512	5080217	50.43	186697	113067	9	18	0		101	5080217	50.43	5024		4747	99.96	0.08	TRUE
562.23072	98	98	64	50	37	28	5016022	5016022	4940026	4844141	4623086	4320996	98	402114	5016022	50.52	185303	82714	10	20	0		98	5016022	50.52	4959		4678	99.96	0.08	TRUE
562.23073	97	97	56	49	39	26	5267543	5267543	5155677	5106926	4962140	4518482	97	406140	5267543	50.41	203107	108585	10	19	0		97	5267543	50.41	5316		5004	99.96	0.08	TRUE
562.23074	90	90	58	49	36	29	5143721	5143721	5077658	5020972	4811125	4566384	90	308622	5143721	50.62	175086	107229	12	22	0		90	5143721	50.62	5140		4887	99.96	0.13	TRUE
562.23075	75	75	48	43	33	22	5075563	5075563	5016294	4978032	4819302	4424449	75	520117	5075563	50.55	189448	113147	8	16	0		75	5075563	50.55	5098		4820	99.96	0.62	TRUE
562.23076	141	141	75	62	43	25	5432616	5432616	5279573	5192047	4890056	4239197	141	429637	5432616	50.4	170763	72666	11	23	0		141	5432616	50.4	5521		5226	99.96	0.85	TRUE
562.23077	114	114	67	56	41	30	5178306	5178306	5073106	4996267	4754067	4350468	114	338517	5178306	50.46	164111	71341	11	23	0		114	5178306	50.46	5288		4996	99.65	0.62	TRUE
562.23078	92	92	59	52	45	32	5060798	5060798	4987576	4938102	4814005	4349371	92	451300	5060798	50.56	136722	76680	12	24	0		92	5060798	50.56	4957		4697	99.96	0.08	TRUE
562.23079	91	91	58	53	43	29	5070317	5070317	4994832	4962953	4794253	4298743	91	451302	5070317	50.55	158185	73253	10	22	0		91	5070317	50.55	4975		4706	99.96	0.08	TRUE
562.2308	120	120	63	54	37	24	5186703	5186703	5050799	4983228	4691018	4245878	120	602696	5186703	50.41	179469	94850	10	20	0		120	5186703	50.41	5173		4864	99.96	0.08	TRUE
562.23081	82	82	54	47	34	24	5086885	5086885	5030778	4983982	4766342	4410605	82	493520	5086885	50.44	196399	101647	8	17	0		82	5086885	50.44	5059		4765	99.96	0.12	TRUE
562.23082	135	135	70	59	42	31	5282887	5282887	5142538	5065745	4823023	4473776	135	430184	5282887	50.21	140174	100286	11	22	0.04		135	5282887	50.21	5381		5055	99.96	0.08	TRUE
562.23083	144	144	73	61	41	27	5223397	5223397	5079750	4998673	4708746	4253112	144	493522	5223397	50.34	134576	88319	11	23	0		144	5223397	50.34	5217		4899	99.96	0.66	TRUE
562.23084	81	81	53	39	35	25	4975135	4975135	4913086	4806193	4752851	4378799	81	450110	4975135	50.57	199224	98696	8	16	0		81	4975135	50.57	4915		4653	99.96	0.08	TRUE
562.23085	117	117	72	55	40	28	5188651	5188651	5088608	4971632	4750813	4331428	117	355619	5188651	50.38	179415	84589	11	22	0		117	5188651	50.38	5225		4916	99.96	0.13	TRUE
562.23086	77	77	56	49	36	26	5032131	5032131	4979862	4928358	4709818	4355494	77	435650	5032131	50.41	185485	98725	9	19	0		77	5032131	50.41	4938		4667	99.96	0.39	TRUE
562.23087	77	77	50	41	32	23	5209215	5209215	5144558	5078605	4927755	4617547	77	760501	5209215	50.58	189254	120974	7	15	0		77	5209215	50.58	5259		4966	99.96	0.08	TRUE
562.23088	63	63	45	43	41	31	4774267	4774267	4739058	4722440	4691598	4314594	63	468538	4774267	50.63	148107	81831	10	20	0		63	4774267	50.63	4696		4454	99.96	0.12	TRUE
562.23089	104	104	61	48	34	23	5091459	5091459	4991820	4894969	4669713	4305428	104	588042	5091459	50.42	182622	108904	9	18	0.06		104	5091459	50.42	5040		4782	99.65	0.08	TRUE
562.2309	71	71	43	40	32	22	4921138	4921138	4846651	4828157	4693730	4324618	71	486199	4921138	50.56	202458	129360	9	16	0		71	4921138	50.56	4801		4546	99.96	0.08	TRUE
562.23091	114	114	65	53	34	23	5076908	5076908	4952478	4865676	4584898	4202826	114	548542	5076908	50.44	179415	102425	10	19	0		114	5076908	50.44	5056		4769	99.96	0.08	TRUE
562.23092	150	150	86	69	49	30	5366816	5366816	5222799	5109583	4766934	4081315	150	395997	5366816	50.5	120164	53622	13	29	0		150	5366816	50.5	5423		5126	99.96	0.18	TRUE
562.23093	72	72	40	37	30	23	5001590	5001590	4926822	4906551	4811774	4554800	72	466243	5001590	50.58	272408	114524	7	14	0		72	5001590	50.58	4925		4687	99.96	0.08	TRUE
562.23094	118	118	74	58	36	26	5091931	5091931	4976968	4856069	4488251	4118101	118	588654	5091931	50.48	161586	69722	10	22	0		118	5091931	50.48	5096		4803	99.96	0.08	TRUE
562.23095	76	76	52	46	34	24	5026705	5026705	4979051	4937751	4749156	4381984	76	501794	5026705	50.47	196399	101647	8	18	0.02		76	5026705	50.47	4973		4707	99.96	0.12	TRUE
562.23096	102	102	58	51	34	25	5150369	5150369	5055056	5003841	4726127	4393198	102	424694	5150369	50.8	178792	109329	11	20	0		102	5150369	50.8	5172		4903	99.96	0.08	TRUE
562.23097	105	105	64	50	34	23	5134841	5134841	5040279	4935965	4677555	4308560	105	525736	5134841	50.44	182622	113067	10	18	0		105	5134841	50.44	5107		4816	99.96	0.08	TRUE
562.23098	93	93	58	54	46	28	5167580	5167580	5086082	5059980	4927616	4315295	93	451301	5167580	50.59	147221	85702	11	22	0		93	5167580	50.59	5096		4823	99.96	0.08	TRUE
562.23099	62	62	47	37	30	21	4810398	4810398	4778944	4708394	4587673	4270608	62	499002	4810398	50.53	203862	129242	7	15	0		62	4810398	50.53	4736		4501	99.96	0.62	TRUE
562.231	78	78	57	51	34	26	5043844	5043844	4993267	4948727	4666271	4381855	78	428357	5043844	50.75	173799	109378	11	20	0		78	5043844	50.75	5042		4784	99.96	0.08	TRUE
562.23101	165	165	91	73	54	33	5095241	5095241	4922690	4798501	4510988	3793414	165	290766	5095241	50.73	105766	45883	15	34	0		165	5095241	50.73	5169		4877	99.96	0.39	TRUE
562.23102	94	94	63	54	40	28	5089398	5089398	5019996	4955118	4732814	4282845	94	525141	5089398	50.45	153026	96355	10	21	0		94	5089398	50.45	5062		4761	99.96	0.08	TRUE
562.23103	110	110	69	52	36	24	5125593	5125593	5033588	4904642	4654092	4252753	110	502905	5125593	50.44	179348	105117	10	19	0		110	5125593	50.44	5102		4804	99.96	0.08	TRUE
562.23104	160	160	71	50	40	30	5219957	5219957	5029969	4895637	4751077	4420555	160	467954	5219957	50.29	152517	87448	11	22	0		160	5219957	50.29	5293		4987	99.96	0.08	TRUE
562.23105	126	126	54	44	36	27	5128003	5128003	4950346	4873734	4760268	4440522	126	389136	5128003	50.58	177979	113134	11	19	0		126	5128003	50.58	5207		4913	99.96	0.45	TRUE
562.23106	101	101	56	48	37	28	5079404	5079404	4989113	4936516	4746390	4435637	101	375358	5079404	50.36	196200	101835	11	19	0		101	5079404	50.36	5057		4773	99.96	0.08	TRUE
562.23107	109	109	60	49	36	25	5019642	5019642	4901617	4827290	4620553	4229009	109	401317	5019642	50.42	186677	90062	10	19	0.02		109	5019642	50.42	4934		4673	99.96	0.08	TRUE
562.23108	99	99	58	49	34	26	5077775	5077775	4991051	4929147	4667997	4364939	99	424931	5077775	50.82	178679	109329	11	20	0		99	5077775	50.82	5066		4811	99.96	0.08	TRUE
562.23109	146	146	84	67	46	32	5456915	5456915	5323749	5207128	4864679	4368350	146	381681	5456915	50.16	137863	64070	14	27	0		146	5456915	50.16	5617		5250	99.81	0.08	TRUE
562.2311	160	160	64	55	42	31	5210687	5210687	5000683	4934075	4742831	4375964	160	475933	5210687	50.59	135473	78299	11	24	0		160	5210687	50.59	5369		5073	99.88	0.62	TRUE
562.23111	65	65	46	40	33	23	5161161	5161161	5120109	5078361	4966050	4616384	65	497506	5161161	50.64	189194	133927	8	16	0		65	5161161	50.64	5170		4898	99.96	0.93	TRUE
562.23112	78	78	57	51	39	32	5295252	5295252	5248855	5210763	5011972	4761765	78	315699	5295252	50.62	172908	106034	13	22	0		78	5295252	50.62	5338		5062	99.96	0.64	TRUE
562.23113	127	127	69	53	39	28	5182482	5182482	5053127	4935199	4714522	4360740	127	359076	5182482	50.41	173022	94028	11	22	0		127	5182482	50.41	5201		4893	99.96	0.08	TRUE
562.23114	88	88	53	46	40	28	4980298	4980298	4903996	4858274	4781117	4387893	88	435758	4980298	50.58	159555	99173	10	20	0		88	4980298	50.58	5003		4766	99.88	0.08	TRUE
562.23115	90	90	61	50	38	31	5136540	5136540	5064283	4989752	4772374	4518992	90	408801	5136540	50.36	159332	95532	11	22	0		90	5136540	50.36	5148		4846	99.96	0.08	TRUE
562.23116	164	164	83	68	49	35	5340094	5340094	5157160	5054481	4737915	4238273	164	351732	5340094	50.67	106896	58620	15	31	0		164	5340094	50.67	5421		5131	99.96	0.18	TRUE
562.23117	86	86	57	51	46	34	5034906	5034906	4967676	4925642	4836750	4417867	86	451301	5034906	50.56	146383	76680	12	24	0		86	5034906	50.56	4932		4664	99.96	0.08	TRUE
562.23118	104	104	58	46	37	26	5143987	5143987	5048006	4966639	4826210	4436601	104	486939	5143987	50.57	186082	89746	9	18	0		104	5143987	50.57	5217		4933	99.96	0.62	TRUE
562.23119	84	84	57	47	34	26	5144789	5144789	5079504	5005727	4792300	4517908	84	390391	5144789	50.43	186542	113125	10	19	0		84	5144789	50.43	5096		4797	99.96	0.08	TRUE
562.2312	126	126	63	52	37	25	5113548	5113548	4972974	4900214	4642682	4221823	126	366422	5113548	50.28	196210	91764	10	19	0		126	5113548	50.28	5101		4837	99.81	0.08	TRUE
562.23121	87	87	50	44	33	20	5082787	5082787	4995684	4954633	4799530	4330180	87	518669	5082787	50.59	203118	118786	8	15	0		87	5082787	50.59	5037		4780	99.96	0.08	TRUE
562.23122	56	56	44	38	31	20	5068532	5068532	5042005	4990520	4880399	4498280	56	519703	5068532	50.51	253555	160688	7	14	0		56	5068532	50.51	5043		4769	99.96	0.62	TRUE
562.23123	95	95	62	47	35	23	5004324	5004324	4932196	4836358	4656179	4259960	95	476387	5004324	50.52	197472	106377	8	17	0		95	5004324	50.52	5022		4758	99.96	0.62	TRUE
562.23124	70	70	46	39	32	19	4877479	4877479	4820176	4768233	4648740	4185720	70	503049	4877479	50.53	238836	125090	7	15	0		70	4877479	50.53	4782		4559	99.96	0.08	TRUE
562.23125	188	188	96	71	50	33	5374316	5374316	5178597	5008470	4672862	4058655	188	287430	5374316	50.52	95116	56809	16	33	0.04		188	5374316	50.52	5416		5143	99.96	0.18	TRUE
562.23126	111	111	72	62	50	32	5058705	5058705	4978839	4911714	4701156	4034144	111	447012	5058705	50.62	106895	63200	13	28	0		111	5058705	50.62	4971		4721	99.96	0.13	TRUE
562.23127	72	72	40	32	28	21	4880235	4880235	4808256	4750179	4702554	4469031	72	540636	4880235	50.61	221005	129027	7	14	0		72	4880235	50.61	4759		4535	99.96	0.08	TRUE
562.23128	101	101	60	49	37	27	5090728	5090728	4993633	4914867	4735966	4409114	101	404510	5090728	50.59	185986	90291	9	19	0		101	5090728	50.59	5151		4853	99.96	0.62	TRUE
562.23129	93	93	59	53	46	32	5187554	5187554	5112642	5075544	4962016	4466201	93	368883	5187554	50.6	157491	76680	12	23	0		93	5187554	50.6	5128		4848	99.96	0.08	TRUE
562.2313	162	162	113	92	69	35	5042704	5042704	4928121	4782932	4389433	3215804	162	224494	5042704	50.55	65655	36548	23	49	0		162	5042704	50.55	5145		4840	99.96	0.46	TRUE
562.23131	105	105	69	61	45	28	5005115	5005115	4924984	4865960	4591060	3971485	105	334288	5005115	50.43	140686	59885	12	25	0.02		105	5005115	50.43	5051		4787	99.88	0.08	TRUE
562.23132	154	154	85	71	46	28	5215986	5215986	5058604	4961833	4556188	3909746	154	294383	5215986	50.45	130210	49698	14	29	0		154	5215986	50.45	5250		4964	99.96	0.08	TRUE
562.23133	144	144	80	69	48	29	5206424	5206424	5066568	4990231	4639939	3970469	144	343566	5206424	50.47	130210	53169	13	28	0		144	5206424	50.47	5211		4924	99.96	0.08	TRUE
562.23134	123	123	78	66	51	29	5052597	5052597	4943517	4850728	4628275	3755954	123	451366	5052597	50.77	106375	49857	13	30	0		123	5052597	50.77	5066		4759	99.96	1.17	TRUE
562.23135	85	85	51	44	34	23	4995810	4995810	4927614	4877610	4678364	4273799	85	459062	4995810	50.7	188324	86616	8	16	0		85	4995810	50.7	4976		4739	99.96	0.08	TRUE
562.23136	117	117	68	53	39	28	5179480	5179480	5073480	4966568	4757853	4397176	117	359076	5179480	50.41	169140	94840	11	21	0		117	5179480	50.41	5207		4886	99.96	0.08	TRUE
562.23137	112	112	71	62	43	34	5142880	5142880	5049576	4982061	4723889	4413361	112	379655	5142880	50.53	120047	83652	13	25	0		112	5142880	50.53	5151		4876	99.96	0.08	TRUE
562.23138	98	98	58	50	42	30	4807043	4807043	4725751	4669531	4526660	4092313	98	452781	4807043	50.73	125305	81384	11	23	0		98	4807043	50.73	4784		4550	100	0.39	TRUE
562.23139	107	107	63	52	35	23	5112302	5112302	5011135	4928200	4675364	4283988	107	525640	5112302	50.44	185580	109837	9	18	0		107	5112302	50.44	5073		4783	99.96	0.08	TRUE
562.2314	88	88	59	53	46	32	5029214	5029214	4966162	4920296	4797065	4305452	88	353833	5029214	50.55	134250	73253	13	24	0		88	5029214	50.55	4926		4665	99.96	0.08	TRUE
562.23141	81	81	54	50	40	30	4793962	4793962	4732877	4702063	4532462	4180379	81	358743	4793962	50.82	154632	76444	11	21	0		81	4793962	50.82	4727		4510	99.96	0.08	TRUE
562.23142	91	91	57	51	38	25	5143776	5143776	5050203	5007288	4798615	4319487	91	377736	5143776	50.37	189589	91613	10	20	0		91	5143776	50.37	5203		4914	99.96	0.08	TRUE
562.23143	73	73	56	46	37	25	5161412	5161412	5127575	5054430	4895356	4457328	73	518601	5161412	50.52	185986	109320	9	18	0		73	5161412	50.52	5174		4864	99.96	0.62	TRUE
562.23144	96	96	56	47	33	26	5099968	5099968	5014884	4949566	4718891	4451016	96	458678	5099968	50.8	178679	111015	11	19	0		96	5099968	50.8	5105		4842	99.96	0.08	TRUE
562.23145	125	125	71	60	49	34	5250700	5250700	5141226	5057458	4876670	4333413	125	342765	5250700	50.47	129850	56826	13	27	0		125	5250700	50.47	5243		4973	99.88	1.12	TRUE
562.23146	124	124	69	50	37	26	5201993	5201993	5077157	4942121	4741766	4389157	124	359075	5201993	50.45	182622	104932	10	20	0		124	5201993	50.45	5248		4940	99.96	0.08	TRUE
562.23147	116	116	70	52	39	27	5144435	5144435	5042542	4910403	4700110	4307438	116	355850	5144435	50.36	179313	94840	11	21	0		116	5144435	50.36	5167		4864	99.96	0.08	TRUE
562.23148	119	119	66	58	42	24	5141626	5141626	5034323	4978717	4719460	4152259	119	434626	5141626	50.54	192143	69186	9	19	0		119	5141626	50.54	5199		4894	99.96	0.62	TRUE
562.23149	156	156	99	81	55	28	5310763	5310763	5175644	5048073	4598416	3606808	156	315018	5310763	50.48	108306	41404	17	37	0.06		156	5310763	50.48	5384		5120	99.96	0.89	TRUE
562.2315	147	147	89	75	55	29	5127413	5127413	5000685	4913878	4583786	3626744	147	422678	5127413	50.67	96447	46913	14	34	0		147	5127413	50.67	5079		4809	99.96	0.13	TRUE
562.23151	88	88	52	47	38	26	5119881	5119881	5027449	4995450	4852970	4449274	88	506797	5119881	50.46	203107	110832	8	18	0		88	5119881	50.46	5065		4788	99.96	0.08	TRUE
562.23152	146	146	70	52	36	26	5266925	5266925	5090219	4958403	4726482	4402594	146	399127	5266925	50.46	179199	90223	11	21	0		146	5266925	50.46	5461		5141	99.96	0.08	TRUE
562.23153	126	126	68	58	49	32	4880673	4880673	4748941	4678091	4527771	3938648	126	310914	4880673	50.78	135620	59740	13	27	0		126	4880673	50.78	4914		4660	99.96	0.08	TRUE
562.23154	65	65	43	38	32	22	4870986	4870986	4815451	4780386	4683695	4346856	65	551830	4870986	50.6	189273	114337	7	15	0		65	4870986	50.6	4832		4597	99.96	0.62	TRUE
562.23155	114	114	67	57	41	27	5117196	5117196	5013195	4942170	4676386	4197459	114	460063	5117196	50.67	159684	76973	11	22	0		114	5117196	50.67	5193		4901	99.96	0.62	TRUE
562.23156	105	105	57	46	33	23	5126119	5126119	5023706	4946419	4751182	4378745	105	504270	5126119	50.52	206117	108279	9	16	0		105	5126119	50.52	5104		4837	99.96	0.08	TRUE
562.23157	200	200	124	99	68	32	5149550	5149550	4960717	4783408	4280219	2946681	200	226183	5149550	50.43	58085	33957	25	55	0		200	5149550	50.43	5273		5000	99.34	0.67	TRUE
562.23158	145	145	95	73	53	30	5342669	5342669	5227541	5079794	4733951	3903602	145	276994	5342669	50.57	108928	47411	15	33	0		145	5342669	50.57	5418		5132	99.96	0.13	TRUE
562.23159	83	83	61	55	39	26	5042203	5042203	4977728	4939725	4663007	4183140	83	356695	5042203	50.71	172754	87087	11	21	0		83	5042203	50.71	5028		4773	99.96	0.08	TRUE
562.2316	105	105	62	49	33	22	5111341	5111341	5020077	4923586	4682500	4306162	105	525637	5111341	50.44	185580	113067	9	17	0		105	5111341	50.44	5064		4787	99.96	0.08	TRUE
562.23161	128	128	72	55	41	27	5283265	5283265	5149830	5024810	4802360	4308727	128	359077	5283265	50.43	179415	68996	11	22	0		128	5283265	50.43	5331		5017	99.96	0.23	TRUE
562.23162	118	118	48	39	28	24	5082710	5082710	4936350	4876254	4708374	4560351	118	538173	5082710	50.6	202448	114520	8	16	0		118	5082710	50.6	5038		4751	99.96	0.08	TRUE
562.23163	129	129	82	71	53	36	4960890	4960890	4853650	4778194	4522760	3880971	129	252594	4960890	50.74	84468	54782	16	34	0		129	4960890	50.74	4946		4677	99.96	0.12	TRUE
562.23164	129	129	90	80	59	33	5199287	5199287	5112393	5043120	4658953	3662718	129	323439	5199287	50.4	91095	47572	18	38	0		129	5199287	50.4	5333		5043	99.96	0.08	TRUE
562.23165	113	113	63	58	43	26	5042259	5042259	4935816	4893439	4646000	4049483	113	374981	5042259	50.64	158389	75027	11	22	0		113	5042259	50.64	5023		4749	99.96	0.63	TRUE
562.23166	98	98	58	49	39	26	4890697	4890697	4807411	4742665	4558858	4054535	98	356620	4890697	50.81	182790	81062	11	20	0		98	4890697	50.81	4841		4617	99.96	0.08	TRUE
562.23167	105	105	64	48	33	26	5216652	5216652	5119395	5009252	4758133	4520171	105	424639	5216652	50.62	181968	109366	10	19	0		105	5216652	50.62	5247		4959	99.96	0.39	TRUE
562.23168	57	57	43	42	38	30	4738249	4738249	4710551	4705121	4654268	4395729	57	387528	4738249	50.62	159555	101350	11	20	0		57	4738249	50.62	4685		4490	99.96	0.08	TRUE
562.23169	73	73	55	48	35	24	4886133	4886133	4847576	4793786	4588153	4159872	73	439820	4886133	50.66	191259	106216	9	17	0		73	4886133	50.66	4776		4539	99.96	0.08	TRUE
562.2317	95	95	59	53	44	31	5188891	5188891	5103437	5066499	4907351	4438339	95	353836	5188891	50.6	158185	76680	11	22	0		95	5188891	50.6	5135		4845	99.96	0.08	TRUE
562.23171	84	84	57	52	46	31	5020966	5020966	4960556	4923762	4817571	4279974	84	450507	5020966	50.6	136903	75914	12	23	0		84	5020966	50.6	4914		4650	99.96	0.08	TRUE
562.23172	109	109	63	46	36	28	5143110	5143110	5042554	4932912	4778693	4510714	109	308621	5143110	50.72	175469	109553	12	21	0		109	5143110	50.72	5173		4921	99.88	0.08	TRUE
562.23173	171	171	110	88	59	29	5312648	5312648	5177263	5022205	4543767	3455748	171	245877	5312648	50.46	94801	37689	19	41	0		171	5312648	50.46	5440		5150	99.96	0.44	TRUE
562.23174	116	116	66	50	36	24	5089357	5089357	4979182	4865981	4625647	4230784	116	480240	5089357	50.3	170105	101672	9	18	0		116	5089357	50.3	5144		4860	99.96	0.08	TRUE
562.23175	138	138	68	55	39	28	5211401	5211401	5064412	4977875	4714018	4353162	138	311716	5211401	50.48	172832	96815	11	22	0		138	5211401	50.48	5269		4973	99.96	0.08	TRUE
562.23176	160	160	108	91	63	31	4977987	4977987	4858799	4746699	4290478	3154071	160	181429	4977987	50.57	77677	35684	21	45	0		160	4977987	50.57	5020		4783	99.96	0.39	TRUE
562.23177	145	145	79	66	46	31	5138497	5138497	4992593	4911229	4563079	4028043	145	296598	5138497	50.66	124084	57000	13	28	0		145	5138497	50.66	5169		4887	99.96	0.13	TRUE
562.23178	63	63	48	41	37	29	4892673	4892673	4857840	4807569	4738539	4414264	63	355932	4892673	50.66	197221	96002	9	19	0		63	4892673	50.66	4764		4555	99.96	0.08	TRUE
562.23179	87	87	42	31	29	21	4947248	4947248	4849718	4766698	4741853	4482533	87	526226	4947248	50.6	198582	160321	8	15	0.02		87	4947248	50.6	4871		4636	99.96	0.08	TRUE
562.2318	77	77	54	43	32	22	4982308	4982308	4934959	4857869	4659966	4298156	77	453981	4982308	50.51	185986	113170	8	16	0		77	4982308	50.51	4973		4703	99.96	0.68	TRUE
562.23181	74	74	55	49	37	28	5027686	5027686	4978737	4935545	4736639	4408188	74	433366	5027686	50.78	173799	98758	11	21	0		74	5027686	50.78	4996		4742	99.96	0.08	TRUE
562.23182	94	94	56	45	36	24	5084116	5084116	4996533	4912258	4776092	4388912	94	359810	5084116	50.43	186687	114421	10	18	0		94	5084116	50.43	5059		4762	99.96	0.08	TRUE
562.23183	156	156	68	55	38	26	5109305	5109305	4913329	4824228	4558497	4167360	156	402130	5109305	50.44	140193	94840	10	21	0		156	5109305	50.44	5082		4802	99.96	0.08	TRUE
562.23184	91	91	46	37	30	23	5002844	5002844	4908747	4836826	4723759	4491002	91	568864	5002844	50.49	227059	134467	7	14	0		91	5002844	50.49	4962		4708	99.88	0.08	TRUE
562.23185	60	60	46	41	35	23	5071486	5071486	5042334	5007423	4922499	4468714	60	519686	5071486	50.5	192288	121067	8	16	0		60	5071486	50.5	5064		4786	99.96	0.62	TRUE
562.23186	84	84	58	51	38	30	5157473	5157473	5094409	5038171	4817709	4550298	84	418277	5157473	50.57	176560	79564	11	21	0		84	5157473	50.57	5121		4856	99.96	0.13	TRUE
562.23187	106	106	57	46	33	22	5039256	5039256	4923537	4842167	4630375	4255721	106	481615	5039256	50.4	186519	113067	9	18	0		106	5039256	50.4	4964		4688	99.96	0.08	TRUE
562.23188	112	112	63	52	36	23	5166652	5166652	5053787	4978870	4747067	4325742	112	513857	5166652	50.45	238933	110544	8	17	0		112	5166652	50.45	5137		4859	99.96	0.08	TRUE
562.23189	112	112	67	53	35	28	5123147	5123147	5025979	4923145	4623138	4379042	112	308610	5123147	50.8	165175	106034	12	22	0		112	5123147	50.8	5108		4853	99.96	0.11	TRUE
562.2319	59	59	43	39	35	22	4952705	4952705	4917776	4888279	4807551	4309130	59	668359	4952705	50.53	194588	111939	8	16	0		59	4952705	50.53	4875		4605	99.96	0.39	TRUE
562.23191	107	107	64	52	37	29	5097982	5097982	5005852	4921633	4657183	4342764	107	308610	5097982	50.77	159218	99518	13	23	0		107	5097982	50.77	5088		4823	99.96	0.11	TRUE
562.23192	100	100	65	51	36	25	5100476	5100476	5023160	4923000	4666033	4286771	100	440543	5100476	50.51	185986	105873	10	20	0		100	5100476	50.51	5176		4860	99.96	0.62	TRUE
562.23193	70	70	49	43	32	23	5125096	5125096	5076729	5032256	4846161	4524111	70	520295	5125096	50.49	203758	124760	8	16	0		70	5125096	50.49	5156		4858	99.96	0.62	TRUE
562.23194	107	107	63	53	33	26	5119012	5119012	5019172	4949763	4619745	4361723	107	362031	5119012	50.8	173037	107847	11	20	0		107	5119012	50.8	5100		4841	99.96	0.11	TRUE
562.23195	287	287	76	60	38	29	5398030	5398030	5046650	4936352	4553368	4218081	287	308271	5398030	50.65	141943	67960	14	27	0		287	5398030	50.65	5514		5233	99.96	0.11	TRUE
562.23196	103	103	60	48	34	26	5050941	5050941	4948375	4860932	4651439	4387402	103	355618	5050941	50.46	182510	113085	10	19	0		103	5050941	50.46	5014		4745	99.96	0.08	TRUE
562.23197	59	59	38	36	29	21	4911351	4911351	4860303	4843487	4728826	4447916	59	523440	4911351	50.55	209562	147481	7	14	0		59	4911351	50.55	4838		4615	99.96	0.11	TRUE
562.23198	81	81	51	47	30	22	5013084	5013084	4940216	4914926	4617291	4358528	81	539549	5013084	50.57	203858	113176	8	16	0		81	5013084	50.57	4982		4729	99.96	0.68	TRUE
562.23199	88	88	62	51	33	27	5075781	5075781	5008310	4934128	4652019	4451489	88	433327	5075781	50.71	180532	109128	11	20	0		88	5075781	50.71	5074		4811	99.96	0.08	TRUE
562.232	83	83	59	53	38	26	5095007	5095007	5032946	4993647	4735279	4311521	83	433563	5095007	50.74	173799	106034	11	21	0		83	5095007	50.74	5119		4849	99.96	0.08	TRUE
562.23201	127	127	68	53	40	28	5230602	5230602	5092401	4984908	4773105	4362904	127	354540	5230602	50.36	173887	105074	12	22	0		127	5230602	50.36	5247		4934	99.96	0.08	TRUE
562.23202	79	79	50	43	34	23	5169484	5169484	5109147	5057083	4903315	4485166	79	519977	5169484	50.45	189193	121067	8	16	0		79	5169484	50.45	5219		4932	99.96	0.66	TRUE
562.23203	73	73	50	46	36	26	5087659	5087659	5038047	5009302	4848268	4493273	73	428133	5087659	50.55	180215	121070	10	18	0		73	5087659	50.55	5092		4795	99.96	0.62	TRUE
562.23204	74	74	53	41	33	25	5092642	5092642	5037503	4947721	4837070	4559640	74	394450	5092642	50.6	192662	129004	10	17	0.02		74	5092642	50.6	4994		4739	99.96	0.08	TRUE
562.23205	134	134	87	74	54	29	5322706	5322706	5212738	5109870	4805239	3947729	134	386492	5322706	50.49	134388	49699	14	30	0		134	5322706	50.49	5362		5044	99.96	0.54	TRUE
562.23206	110	110	54	48	34	27	5038778	5038778	4918971	4881595	4644694	4384956	110	359271	5038778	50.5	191651	86666	10	19	0		110	5038778	50.5	5095		4808	99.88	0.08	TRUE
562.23207	107	107	57	48	35	27	5057801	5057801	4953019	4894252	4685838	4424361	107	311506	5057801	50.52	187583	101437	11	20	0		107	5057801	50.52	5127		4854	99.96	0.08	TRUE
562.23208	42	42	33	31	29	22	4585687	4585687	4569317	4555659	4535015	4257798	42	483580	4585687	50.76	226338	118494	8	14	0		42	4585687	50.76	4436		4262	99.96	0.08	TRUE
562.23209	115	115	66	49	34	25	5065969	5065969	4949871	4829489	4601933	4286584	115	389814	5065969	50.4	181143	113393	10	19	0		115	5065969	50.4	5021		4753	99.96	0.62	TRUE
562.2321	94	94	54	43	37	24	5252140	5252140	5163601	5094647	4988958	4544071	94	397015	5252140	50.35	191900	138860	10	18	0		94	5252140	50.35	5288		4978	99.96	0.45	TRUE
562.23211	115	115	66	51	40	28	5220311	5220311	5106266	4992599	4807944	4431001	115	359076	5220311	50.32	179305	94257	11	21	0		115	5220311	50.32	5270		4952	99.96	0.08	TRUE
562.23212	101	101	66	54	34	27	5159044	5159044	5069754	4986269	4661544	4389143	101	433457	5159044	50.81	178678	109366	12	21	0		101	5159044	50.81	5174		4896	99.96	0.08	TRUE
562.23213	76	76	44	35	28	22	4941446	4941446	4863372	4806626	4695548	4488585	76	526761	4941446	50.55	254799	117247	7	14	0		76	4941446	50.55	4836		4569	99.96	0.08	TRUE
562.23214	76	76	47	42	32	22	4930069	4930069	4861477	4825599	4651613	4296442	76	472409	4930069	50.48	202448	114520	9	16	0		76	4930069	50.48	4812		4551	99.96	0.08	TRUE
562.23215	80	80	57	45	31	21	5062726	5062726	5009488	4921796	4675151	4326057	80	519460	5062726	50.61	240475	108335	8	15	0		80	5062726	50.61	4992		4722	99.96	0.08	TRUE
562.23216	112	112	72	63	46	29	4834614	4834614	4736263	4658708	4375668	3779810	112	338891	4834614	50.63	110883	59982	13	27	0		112	4834614	50.63	4811		4572	99.88	0.08	TRUE
562.23217	69	69	45	39	32	23	5113556	5113556	5059060	5019678	4920037	4597079	69	519977	5113556	50.56	189274	130921	8	16	0		69	5113556	50.56	5114		4834	99.96	0.62	TRUE
562.23218	101	101	63	48	36	26	5001491	5001491	4911581	4810983	4613322	4245326	101	401992	5001491	50.51	186498	98725	9	19	0		101	5001491	50.51	4937		4673	99.96	0.13	TRUE
562.23219	96	96	66	56	41	29	5068607	5068607	4998467	4927254	4672412	4263384	96	402131	5068607	50.38	172251	69460	11	22	0		96	5068607	50.38	5015		4732	99.96	0.08	TRUE
562.2322	75	75	50	45	37	26	5032774	5032774	4974691	4937583	4811372	4417624	75	525809	5032774	50.57	203190	101118	8	17	0		75	5032774	50.57	5005		4745	99.96	0.08	TRUE
562.23221	75	75	53	46	41	29	4910353	4910353	4857637	4810988	4712763	4315762	75	507447	4910353	50.59	177616	83471	9	19	0		75	4910353	50.59	4769		4561	99.96	0.08	TRUE
562.23222	114	114	72	51	39	25	5132745	5132745	5036119	4892463	4686268	4206029	114	409555	5132745	50.66	172718	99335	11	20	0		114	5132745	50.66	5176		4890	99.96	0.39	TRUE
562.23223	89	89	46	43	37	21	5030747	5030747	4931341	4908442	4826232	4228434	89	531792	5030747	50.57	229449	133682	9	16	0		89	5030747	50.57	5033		4783	99.96	0.08	TRUE
562.23224	91	91	55	44	35	26	5062465	5062465	4985178	4902526	4761622	4452864	91	500122	5062465	50.54	199059	98733	8	18	0		91	5062465	50.54	5007		4729	99.96	0.08	TRUE
562.23225	90	90	60	45	35	26	5085735	5085735	5003985	4895489	4731196	4423715	90	431445	5085735	50.55	185986	101989	9	19	0		90	5085735	50.55	5145		4874	99.96	0.62	TRUE
562.23226	79	79	56	50	34	25	5093687	5093687	5036441	4996292	4756648	4441327	79	474897	5093687	50.75	180447	118267	10	18	0		79	5093687	50.75	5068		4807	99.96	0.62	TRUE
562.23227	84	84	49	38	31	25	5023887	5023887	4942533	4871378	4767733	4561397	84	431468	5023887	50.52	202448	114521	8	16	0		84	5023887	50.52	4994		4702	99.96	0.13	TRUE
562.23228	146	146	70	60	45	28	5225725	5225725	5045531	4969751	4766107	4143242	146	338413	5225725	50.43	164442	60304	11	25	0		146	5225725	50.43	5330		5032	99.96	0.67	TRUE
562.23229	102	102	64	56	38	27	5286361	5286361	5195603	5135732	4831845	4436094	102	364230	5286361	50.71	162133	106034	12	22	0		102	5286361	50.71	5385		5085	99.96	0.08	TRUE
562.2323	109	109	63	51	35	26	5147302	5147302	5032903	4942423	4688130	4361669	109	526758	5147302	50.37	175419	103208	10	20	0		109	5147302	50.37	5131		4837	99.96	0.31	TRUE
562.23231	120	120	59	53	39	29	5247577	5247577	5119908	5076468	4840741	4470870	120	301647	5247577	50.67	170471	106034	13	22	0		120	5247577	50.67	5309		5019	99.96	0.81	TRUE
562.23232	78	78	55	51	41	28	4776972	4776972	4728984	4701234	4528190	4054531	78	500770	4776972	50.59	138704	92315	11	21	0		78	4776972	50.59	4690		4497	99.96	0.08	TRUE
562.23233	92	92	58	50	44	32	5062571	5062571	4986601	4933921	4814329	4388841	92	451300	5062571	50.56	147216	76123	12	23	0		92	5062571	50.56	4956		4691	99.96	0.08	TRUE
562.23234	103	103	65	52	36	30	5024312	5024312	4939065	4850139	4595544	4396372	103	402131	5024312	50.52	170907	98725	11	21	0		103	5024312	50.52	4954		4686	99.96	0.08	TRUE
562.23235	47	47	38	37	31	25	5075445	5075445	5052700	5044403	4924600	4700569	47	431723	5075445	50.52	213998	123728	9	16	0		47	5075445	50.52	5021		4762	99.96	0.62	TRUE
562.23236	61	61	49	43	34	24	5051094	5051094	5023804	4983891	4838768	4466968	61	519978	5051094	50.5	189331	113318	8	16	0		61	5051094	50.5	5027		4740	99.96	0.62	TRUE
562.23237	77	77	50	41	31	22	4884372	4884372	4825960	4758204	4598025	4273540	77	526759	4884372	50.54	196850	113097	8	16	0		77	4884372	50.54	4765		4507	99.81	0.08	TRUE
562.23238	69	69	45	39	32	22	5037172	5037172	4983210	4941989	4836918	4475846	69	497245	5037172	50.53	189408	130926	8	15	0.04		69	5037172	50.53	5030		4755	99.96	0.62	TRUE
562.23239	99	99	57	47	33	25	5077699	5077699	4988810	4916488	4682451	4394385	99	425079	5077699	50.82	180448	111128	10	19	0		99	5077699	50.82	5063		4806	99.96	0.08	TRUE
562.2324	114	114	52	45	37	27	5256811	5256811	5118362	5071991	4953397	4610127	114	503834	5256811	50.59	172477	110473	9	18	0		114	5256811	50.59	5337		5045	99.96	0.31	TRUE
562.23241	66	66	41	37	30	23	4990486	4990486	4927674	4902329	4807956	4554758	66	466365	4990486	50.58	272406	114431	7	14	0		66	4990486	50.58	4915		4679	99.96	0.08	TRUE
562.23242	99	99	49	41	35	24	5134186	5134186	5031634	4976396	4891361	4512545	99	519973	5134186	50.55	185897	119014	8	17	0		99	5134186	50.55	5163		4882	99.96	0.62	TRUE
562.23243	98	98	57	46	32	23	5054490	5054490	4960185	4874749	4644326	4311031	98	390506	5054490	50.44	182597	113085	10	18	0		98	5054490	50.44	4996		4713	99.96	0.08	TRUE
562.23244	101	101	59	47	35	23	5078996	5078996	4982134	4889949	4705784	4309786	101	525637	5078996	50.47	182622	109837	9	18	0		101	5078996	50.47	5032		4748	99.96	0.08	TRUE
562.23245	188	188	109	88	58	29	5266270	5266270	5069443	4921395	4456592	3367652	188	259174	5266270	50.57	105614	37849	19	42	0.02		188	5266270	50.57	5439		5148	99.96	0.08	TRUE
562.23246	150	150	90	74	54	35	5314390	5314390	5171043	5057575	4720497	4076988	150	351731	5314390	50.61	97849	60403	17	34	0		150	5314390	50.61	5305		5029	99.96	0.28	TRUE
562.23247	105	105	63	51	36	23	5106651	5106651	5016026	4926421	4696935	4256515	105	525736	5106651	50.43	185580	105117	9	18	0		105	5106651	50.43	5064		4782	99.96	0.08	TRUE
562.23248	110	110	71	54	36	28	5275918	5275918	5197013	5081340	4792606	4494712	110	424983	5275918	50.67	171989	106034	12	22	0		110	5275918	50.67	5319		5041	99.96	0.58	TRUE
562.23249	90	90	59	47	33	21	5079614	5079614	5010723	4919996	4705191	4322156	90	525736	5079614	50.45	202475	113067	7	15	0		90	5079614	50.45	5014		4736	99.96	0.08	TRUE
562.2325	87	87	58	53	43	28	5024499	5024499	4956656	4921802	4756831	4192985	87	376398	5024499	50.66	158059	79666	12	23	0		87	5024499	50.66	4937		4701	99.96	0.13	TRUE
562.23251	102	102	57	48	36	24	4974253	4974253	4877127	4812670	4632771	4209990	102	424079	4974253	50.55	185986	110990	10	18	0		102	4974253	50.55	5014		4737	99.96	0.62	TRUE
562.23252	183	183	129	102	72	32	5273376	5273376	5140588	4942834	4442568	3015608	183	226183	5273376	50.5	58068	32757	25	56	0		183	5273376	50.5	5427		5114	99.34	0.62	TRUE
562.23253	73	73	44	40	35	28	5016430	5016430	4954877	4925148	4846999	4604097	73	466276	5016430	50.54	186389	109671	10	19	0		73	5016430	50.54	4960		4718	99.96	0.89	TRUE
562.23254	78	78	52	50	43	24	5078528	5078528	5025176	5008702	4892708	4211309	78	420484	5078528	50.72	188042	86604	10	19	0		78	5078528	50.72	5038		4771	99.96	0.76	TRUE
562.23255	110	110	68	57	42	29	5322885	5322885	5234745	5156847	4928248	4451922	110	429268	5322885	50.49	163569	93704	11	22	0		110	5322885	50.49	5323		5042	99.96	0.85	TRUE
562.23256	166	166	96	84	54	32	5132747	5132747	4971773	4895421	4420411	3609618	166	256804	5132747	50.47	108806	42525	19	38	0		166	5132747	50.47	5159		4895	99.96	0.08	TRUE
562.23257	66	66	50	43	33	24	5127922	5127922	5096842	5050607	4872351	4544505	66	643591	5127922	50.55	185897	121067	8	16	0		66	5127922	50.55	5148		4839	99.96	0.62	TRUE
562.23258	126	126	77	64	46	30	4986141	4986141	4877977	4784798	4458700	3900785	126	299472	4986141	50.65	129480	56446	13	28	0		126	4986141	50.65	4964		4689	99.96	0.39	TRUE
562.23259	99	99	61	49	33	26	5071300	5071300	4980228	4896038	4626699	4378074	99	424786	5071300	50.72	180449	109366	10	19	0		99	5071300	50.72	5052		4784	99.96	0.31	TRUE
562.2326	89	89	57	48	42	32	4981503	4981503	4917445	4857221	4737664	4363000	89	543878	4981503	50.71	139762	85644	12	23	0		89	4981503	50.71	4928		4678	99.96	0.08	TRUE
562.23261	101	101	62	49	35	26	5143078	5143078	5056117	4966208	4747480	4442796	101	424785	5143078	50.67	180478	109366	10	19	0		101	5143078	50.67	5149		4870	99.96	0.31	TRUE
562.23262	63	63	48	41	33	25	4984802	4984802	4956934	4906961	4785208	4481046	63	477570	4984802	50.51	198083	128614	8	16	0		63	4984802	50.51	4889		4609	99.96	0.12	TRUE
562.23263	38	38	30	30	29	22	4889718	4889718	4865613	4865613	4855334	4620137	38	740162	4889718	50.46	301407	193446	6	11	0		38	4889718	50.46	4804		4581	99.96	0.08	TRUE
562.23264	83	83	56	46	41	31	5068088	5068088	5007817	4934922	4848926	4507734	83	319629	5068088	50.67	171655	90578	12	22	0		83	5068088	50.67	4989		4756	99.96	0.13	TRUE
562.23265	100	100	56	48	38	28	5141306	5141306	5043162	4987710	4835048	4465925	100	388784	5141306	50.39	176072	95060	10	20	0		100	5141306	50.39	5085		4822	99.88	0.63	TRUE
562.23266	131	131	68	53	38	26	5087146	5087146	4942083	4823654	4588940	4184735	131	538172	5087146	50.32	174032	94849	11	21	0		131	5087146	50.32	5048		4758	99.96	0.08	TRUE
562.23267	73	73	48	38	30	21	4953215	4953215	4889998	4814531	4681173	4371043	73	651346	4953215	50.62	206576	114513	6	14	0		73	4953215	50.62	4872		4610	99.96	0.08	TRUE
562.23268	96	96	58	48	35	23	5127453	5127453	5041013	4963290	4777129	4353646	96	519505	5127453	50.44	214001	98725	8	17	0		96	5127453	50.44	5095		4789	99.96	0.08	TRUE
562.23269	72	72	52	46	36	25	5124859	5124859	5075230	5036193	4893149	4528374	72	319260	5124859	50.52	197622	123904	10	18	0		72	5124859	50.52	5149		4881	99.96	0.08	TRUE
562.2327	95	95	64	53	38	26	5121235	5121235	5043044	4968959	4697100	4300386	95	362229	5121235	50.6	174791	89058	10	20	0		95	5121235	50.6	5150		4878	99.81	0.39	TRUE
562.23271	106	106	55	43	32	22	5041251	5041251	4925133	4838423	4651193	4320521	106	525738	5041251	50.4	186498	114518	9	17	0		106	5041251	50.4	4963		4696	99.96	0.08	TRUE
562.23272	81	81	56	50	41	28	4859561	4859561	4804984	4766820	4601109	4171851	81	287683	4859561	50.68	161175	85793	12	21	0		81	4859561	50.68	4807		4585	99.96	0.08	TRUE
562.23273	112	112	66	56	38	30	5207196	5207196	5102978	5033669	4725338	4412407	112	308610	5207196	50.74	159218	95108	13	24	0		112	5207196	50.74	5217		4949	99.65	0.11	TRUE
562.23274	115	115	62	48	39	23	5136142	5136142	5022599	4924977	4794370	4231851	115	430298	5136142	50.59	189254	101989	9	18	0		115	5136142	50.59	5136		4847	99.73	0.08	TRUE
562.23275	122	122	66	53	37	23	5242208	5242208	5109901	5025137	4798832	4319376	122	513855	5242208	50.51	189803	101672	9	18	0		122	5242208	50.51	5238		4944	99.96	0.08	TRUE
562.23276	143	143	83	64	41	27	5302484	5302484	5146942	5017644	4630478	4117966	143	369419	5302484	50.43	143815	67294	12	25	0		143	5302484	50.43	5354		5028	99.96	0.08	TRUE
562.23277	93	93	65	57	42	26	5224192	5224192	5148574	5094145	4820447	4230944	93	377210	5224192	50.56	183679	74478	10	21	0		93	5224192	50.56	5265		4962	99.96	0.08	TRUE
562.23278	128	128	78	62	48	32	5175878	5175878	5062494	4962336	4715477	4147696	128	395997	5175878	50.69	116253	63114	14	28	0		128	5175878	50.69	5101		4841	99.96	0.13	TRUE
562.23279	126	126	79	69	48	29	5127130	5127130	5021118	4953631	4614385	3921690	126	422677	5127130	50.69	141012	61246	14	28	0		126	5127130	50.69	5080		4809	99.96	0.13	TRUE
562.2328	99	99	56	46	36	24	4971117	4971117	4873513	4798822	4657728	4245593	99	404619	4971117	50.52	185987	101977	9	18	0		99	4971117	50.52	4985		4705	99.96	0.62	TRUE
562.23281	89	89	63	56	42	25	4978890	4978890	4910611	4857155	4637700	3996927	89	401134	4978890	50.43	158637	82871	11	22	0		89	4978890	50.43	4979		4700	99.88	0.19	TRUE
562.23282	130	130	69	53	37	29	5299629	5299629	5157944	5043572	4776070	4479871	130	330473	5299629	50.69	159842	99323	13	23	0		130	5299629	50.69	5356		5074	99.96	0.11	TRUE
562.23283	170	170	93	71	51	31	5088168	5088168	4908856	4760349	4424067	3709224	170	330341	5088168	50.62	97812	46313	17	34	0		170	5088168	50.62	5281		4993	99.96	0.31	TRUE
562.23284	122	122	69	55	37	27	5218519	5218519	5093598	5000223	4683305	4333173	122	388731	5218519	50.71	161417	96379	12	22	0		122	5218519	50.71	5264		4975	99.96	0.08	TRUE
562.23285	109	109	76	63	43	35	5201484	5201484	5124134	5035560	4745318	4479001	109	308611	5201484	50.75	127970	82414	15	27	0		109	5201484	50.75	5242		4964	99.88	0.08	TRUE
562.23286	143	143	97	80	54	29	4909171	4909171	4803006	4685065	4243843	3360111	143	304983	4909171	50.66	82646	39508	15	37	0		143	4909171	50.66	4917		4670	99.96	0.62	TRUE
562.23287	130	130	83	72	53	30	5320076	5320076	5204123	5116094	4830096	4033867	130	386492	5320076	50.49	130743	51722	14	30	0		130	5320076	50.49	5369		5047	99.96	0.54	TRUE
562.23288	111	111	68	62	48	35	4900416	4900416	4790623	4751285	4535920	4061098	111	268903	4900416	50.56	111794	66087	14	29	0		111	4900416	50.56	4894		4645	99.96	0.08	TRUE
562.23289	92	92	48	41	34	27	5110352	5110352	5009954	4958935	4850715	4601786	92	516305	5110352	50.71	189394	113140	8	17	0		92	5110352	50.71	5137		4884	99.96	0.39	TRUE
562.2329	104	104	58	55	45	29	4894991	4894991	4801153	4777526	4616660	4033907	104	286107	4894991	50.58	160891	72992	12	24	0		104	4894991	50.58	4910		4691	99.96	0.44	TRUE
562.23291	107	107	65	50	35	23	5104594	5104594	5008060	4891036	4655471	4260659	107	525736	5104594	50.46	182622	113067	10	18	0		107	5104594	50.46	5058		4770	99.96	0.08	TRUE
562.23292	92	92	58	52	37	25	5228278	5228278	5148560	5104969	4853366	4452119	92	443863	5228278	50.54	173795	113141	10	19	0		92	5228278	50.54	5293		4980	99.88	0.62	TRUE
562.23293	98	98	57	46	34	22	5030922	5030922	4936726	4853133	4663645	4266427	98	525736	5030922	50.45	182511	113067	9	17	0		98	5030922	50.45	4946		4681	99.96	0.08	TRUE
562.23294	105	105	59	47	34	21	5030719	5030719	4923485	4830718	4633384	4192184	105	481613	5030719	50.45	182538	113067	9	17	0		105	5030719	50.45	4948		4684	99.96	0.08	TRUE
562.23295	100	100	57	46	34	22	5029281	5029281	4928903	4843478	4663517	4266299	100	525736	5029281	50.44	182538	113067	9	17	0		100	5029281	50.44	4955		4683	99.96	0.08	TRUE
562.23296	101	101	48	42	36	26	5130471	5130471	5012627	4972702	4878608	4520513	101	486953	5130471	50.61	186574	112395	8	17	0		101	5130471	50.61	5206		4905	99.96	0.62	TRUE
562.23297	70	70	47	41	32	24	5036141	5036141	4979477	4932041	4780125	4467183	70	450779	5036141	50.62	190918	123934	10	17	0		70	5036141	50.62	4972		4724	99.96	0.08	TRUE
562.23298	83	83	55	51	47	31	4878827	4878827	4822387	4791953	4720259	4142725	83	440478	4878827	50.68	135012	69978	11	23	0		83	4878827	50.68	4843		4602	99.96	0.08	TRUE
562.23299	109	109	65	54	41	29	4939784	4939784	4831165	4755100	4542045	4155671	109	363072	4939784	50.64	172695	66600	11	22	0		109	4939784	50.64	4941		4678	99.96	0.62	TRUE
562.233	45	45	32	29	27	21	4804004	4804004	4776376	4757257	4734315	4501172	45	681647	4804004	50.69	331507	121857	6	12	0		45	4804004	50.69	4653		4439	99.96	0.08	TRUE
562.23301	99	99	56	46	37	25	4985539	4985539	4890727	4818368	4691812	4269800	99	404741	4985539	50.52	186097	101977	9	18	0		99	4985539	50.52	5008		4722	99.96	0.62	TRUE
562.23302	135	135	90	72	49	30	4758774	4758774	4653229	4535069	4133707	3437848	135	210232	4758774	50.81	99497	45577	16	33	0		135	4758774	50.81	4722		4479	99.96	0.08	TRUE
562.23303	52	52	34	33	28	21	4900702	4900702	4852640	4847434	4769655	4537719	52	677001	4900702	50.48	251933	152682	6	13	0		52	4900702	50.48	4783		4555	99.96	0.08	TRUE
562.23304	99	99	64	56	38	27	5203211	5203211	5129909	5080184	4812669	4421760	99	463087	5203211	50.45	196399	96794	9	20	0		99	5203211	50.45	5228		4924	99.96	0.12	TRUE
562.23305	118	118	66	53	33	26	5170506	5170506	5060262	4966602	4643710	4376235	118	424903	5170506	50.83	180449	102249	11	20	0		118	5170506	50.83	5186		4917	99.96	0.08	TRUE
562.23306	107	107	64	52	35	27	5140111	5140111	5044116	4962337	4670633	4361711	107	325554	5140111	50.81	165175	106261	12	22	0		107	5140111	50.81	5114		4858	99.96	0.11	TRUE
562.23307	109	109	67	51	32	25	5092860	5092860	5008186	4902289	4555039	4280954	109	424827	5092860	50.78	173799	109329	11	20	0		109	5092860	50.78	5116		4844	99.96	0.08	TRUE
562.23308	111	111	66	49	37	27	5117557	5117557	5018252	4896109	4729340	4382763	111	359075	5117557	50.41	173031	100572	11	20	0		111	5117557	50.41	5102		4808	99.96	0.08	TRUE
562.23309	107	107	61	49	35	22	5111797	5111797	5005345	4913082	4700432	4258272	107	525736	5111797	50.44	186495	110588	9	17	0		107	5111797	50.44	5066		4775	99.96	0.08	TRUE
562.2331	104	104	61	52	36	22	5120258	5120258	5022187	4954873	4714511	4237069	104	525736	5120258	50.44	185580	110567	9	18	0		104	5120258	50.44	5081		4796	99.96	0.08	TRUE
562.23311	101	101	60	53	36	28	5222192	5222192	5134263	5085104	4798186	4505637	101	319452	5222192	50.69	167131	106261	12	21	0		101	5222192	50.69	5249		4975	99.96	0.58	TRUE
562.23312	107	107	61	50	36	24	5168032	5168032	5051221	4967986	4761204	4354987	107	521272	5168032	50.45	185841	104912	9	18	0		107	5168032	50.45	5176		4872	99.96	0.08	TRUE
562.23313	85	85	50	41	33	25	4906254	4906254	4819754	4757855	4653335	4362158	85	470887	4906254	50.55	185839	108274	8	17	0		85	4906254	50.55	4838		4575	99.65	0.08	TRUE
562.23314	94	94	67	62	46	28	4771357	4771357	4701480	4658575	4407118	3721510	94	337274	4771357	50.62	127878	60716	13	26	0		94	4771357	50.62	4766		4536	99.96	0.08	TRUE
562.23315	115	115	76	58	46	27	5176104	5176104	5079001	4948281	4763346	4066739	115	329446	5176104	50.46	152516	60304	12	24	0		115	5176104	50.46	5253		4956	99.96	0.62	TRUE
562.23316	103	103	69	60	42	26	5119147	5119147	5053386	4993095	4725012	4184158	103	493423	5119147	50.4	141120	97001	11	22	0		103	5119147	50.4	5068		4769	99.96	0.42	TRUE
562.23317	90	90	66	57	45	27	4805076	4805076	4741934	4670385	4482498	3794886	90	362883	4805076	50.62	127878	63600	12	24	0		90	4805076	50.62	4826		4591	99.96	0.08	TRUE
562.23318	53	53	40	39	34	27	4998418	4998418	4966108	4957439	4877585	4645236	53	838690	4998418	50.44	207838	110641	7	15	0		53	4998418	50.44	4962		4724	99.88	0.08	TRUE
562.23319	66	66	48	43	33	22	5051000	5051000	5010527	4975563	4823560	4422486	66	519923	5051000	50.5	189336	124760	8	15	0		66	5051000	50.5	5044		4754	99.96	0.62	TRUE
562.2332	128	128	84	75	47	30	5039485	5039485	4942933	4878822	4421320	3770403	128	363512	5039485	50.39	119812	49713	16	31	0		128	5039485	50.39	5034		4726	99.96	0.12	TRUE
562.23321	107	107	64	56	37	26	5076610	5076610	4966374	4915325	4623728	4218596	107	433457	5076610	50.68	166801	95970	12	22	0		107	5076610	50.68	5113		4841	99.96	0.13	TRUE
562.23322	106	106	71	59	48	30	4849645	4849645	4772130	4688531	4535745	3899603	106	287289	4849645	50.82	126032	61946	13	26	0		106	4849645	50.82	4802		4550	99.96	0.08	TRUE
562.23323	119	119	65	55	40	28	5266602	5266602	5137524	5061763	4831190	4425262	119	417466	5266602	50.63	154370	87962	11	22	0		119	5266602	50.63	5394		5094	99.88	0.62	TRUE
562.23324	80	80	60	49	40	25	5087420	5087420	5039744	4960000	4817767	4288525	80	539654	5087420	50.61	188033	90855	9	19	0		80	5087420	50.61	5086		4816	99.96	0.08	TRUE
562.23325	128	128	68	53	39	27	5161972	5161972	5028382	4933938	4725842	4317647	128	430124	5161972	50.31	163031	100960	11	21	0		128	5161972	50.31	5153		4858	99.96	0.08	TRUE
562.23326	63	63	44	43	33	24	4692142	4692142	4642029	4636858	4471335	4154675	63	361565	4692142	50.69	187045	106047	9	17	0		63	4692142	50.69	4561		4352	99.96	0.08	TRUE
562.23327	119	119	79	60	45	30	5152563	5152563	5062175	4928403	4680502	4170958	119	395998	5152563	50.66	137127	66823	12	25	0.02		119	5152563	50.66	5126		4866	99.96	0.13	TRUE
562.23328	110	110	65	55	36	26	5003406	5003406	4896011	4825453	4488495	4155460	110	355430	5003406	50.79	165406	99606	11	21	0		110	5003406	50.79	5010		4747	99.96	0.11	TRUE
562.23329	100	100	62	48	35	25	5140836	5140836	5053884	4953331	4731606	4369187	100	502043	5140836	50.5	178529	106260	10	19	0		100	5140836	50.5	5099		4839	99.96	0.08	TRUE
562.2333	108	108	82	68	58	34	5363242	5363242	5305053	5203076	5056455	4163246	108	361502	5363242	50.46	100203	53248	15	32	0		108	5363242	50.46	5382		5071	99.96	0.08	TRUE
562.23331	98	98	49	41	33	25	5248773	5248773	5141154	5088882	4962902	4682709	98	486917	5248773	50.64	235558	109761	8	16	0		98	5248773	50.64	5388		5079	99.96	0.62	TRUE
562.23332	163	163	104	83	56	28	5315154	5315154	5178635	5035126	4587269	3585513	163	315056	5315154	50.41	109858	40759	17	38	0		163	5315154	50.41	5413		5124	99.96	0.94	TRUE
562.23333	75	75	54	46	33	22	5051715	5051715	5000788	4948776	4741745	4344514	75	525429	5051715	50.63	189192	121898	8	16	0		75	5051715	50.63	5066		4764	99.96	0.93	TRUE
562.23334	86	86	58	48	35	25	5097319	5097319	5032796	4958003	4746002	4398440	86	439549	5097319	50.51	179396	105127	9	18	0		86	5097319	50.51	5034		4757	99.96	0.08	TRUE
562.23335	83	83	52	42	34	25	5075169	5075169	4999767	4924871	4791221	4472652	83	401104	5075169	50.47	185986	121068	9	18	0		83	5075169	50.47	5092		4806	99.96	0.62	TRUE
562.23336	71	71	44	40	31	26	5079556	5079556	5021365	4993267	4838321	4641537	71	421895	5079556	50.55	224196	123811	9	16	0		71	5079556	50.55	5051		4781	99.96	0.08	TRUE
562.23337	95	95	48	40	34	24	4995319	4995319	4891412	4839509	4746834	4398525	95	539566	4995319	50.67	186013	113358	9	17	0		95	4995319	50.67	4959		4725	99.96	0.39	TRUE
562.23338	72	72	53	46	33	26	5083938	5083938	5036740	4987072	4796655	4556633	72	434829	5083938	50.72	190750	117881	10	18	0		72	5083938	50.72	5062		4805	99.96	0.31	TRUE
562.23339	75	75	53	43	33	23	4942877	4942877	4894329	4827102	4682183	4325954	75	525420	4942877	50.58	185981	113338	8	17	0		75	4942877	50.58	4954		4683	99.96	0.62	TRUE
562.2334	74	74	55	47	40	27	5093905	5093905	5051547	4990606	4885249	4412156	74	477044	5093905	50.58	173906	101991	10	20	0		74	5093905	50.58	5103		4824	99.94	0.62	TRUE
562.23341	143	143	90	69	51	29	5227250	5227250	5103893	4953586	4651565	3851022	143	302652	5227250	50.7	120346	48695	14	31	0		143	5227250	50.7	5215		4944	99.96	0.13	TRUE
562.23342	117	117	62	51	35	24	5121691	5121691	4994056	4914435	4703193	4333340	117	484371	5121691	50.41	174431	115302	10	19	0		117	5121691	50.41	5119		4843	99.96	0.08	TRUE
562.23343	106	106	58	45	33	23	5082882	5082882	4977953	4884706	4693034	4335290	106	450061	5082882	50.45	186474	113085	9	17	0		106	5082882	50.45	5031		4747	99.96	0.08	TRUE
562.23344	42	42	34	33	32	23	4926309	4926309	4906540	4899049	4874886	4569971	42	882607	4926309	50.37	245312	114147	6	12	0		42	4926309	50.37	4870		4655	99.96	0.08	TRUE
562.23345	92	92	72	63	50	32	5055979	5055979	5006275	4940223	4723917	4110959	92	285227	5055979	50.67	132215	66178	13	27	0.02		92	5055979	50.67	5066		4792	99.96	0.78	TRUE
562.23346	53	53	39	36	29	20	4779304	4779304	4741820	4722583	4608655	4280533	53	527836	4779304	50.52	256441	141293	7	13	0		53	4779304	50.52	4654		4445	99.96	0.08	TRUE
562.23347	111	111	69	58	39	30	5364513	5364513	5264390	5194262	4884653	4561315	111	433221	5364513	50.63	166801	96379	12	23	0		111	5364513	50.63	5439		5119	99.96	0.31	TRUE
562.23348	120	120	68	55	40	31	5223909	5223909	5109283	5020530	4753331	4401411	120	323503	5223909	50.69	159842	87086	13	25	0		120	5223909	50.69	5259		4981	99.96	0.11	TRUE
562.23349	79	79	47	41	35	24	5096131	5096131	5021789	4977723	4887290	4520954	79	557960	5096131	50.58	186702	121068	8	16	0		79	5096131	50.58	5108		4814	99.96	0.62	TRUE
562.2335	72	72	49	44	37	26	5183303	5183303	5134263	5097606	4979567	4591111	72	519708	5183303	50.53	189246	113139	9	18	0		72	5183303	50.53	5215		4938	99.96	1.18	TRUE
562.23351	104	104	62	52	33	25	5167053	5167053	5073445	4999826	4678801	4375601	104	424717	5167053	50.61	180447	109366	11	20	0		104	5167053	50.61	5231		4944	99.65	0.08	TRUE
562.23352	61	61	43	39	32	21	5071894	5071894	5026957	4997920	4884932	4468278	61	663879	5071894	50.53	203771	130921	7	14	0		61	5071894	50.53	5065		4796	99.96	0.62	TRUE
562.23353	123	123	79	63	51	32	4964500	4964500	4873353	4759415	4587126	3890769	123	379612	4964500	50.8	111526	55185	14	29	0		123	4964500	50.8	4939		4665	99.96	0.08	TRUE
562.23354	49	49	38	32	24	20	4729647	4729647	4699783	4656079	4521554	4387845	49	469025	4729647	50.41	235265	186616	7	13	0		49	4729647	50.41	4585		4354	99.96	0.08	TRUE
562.23355	121	121	71	59	47	30	5531255	5531255	5422324	5341925	5159194	4513586	121	453443	5531255	50.28	143267	68430	11	24	0		121	5531255	50.28	5740		5387	99.96	0.66	TRUE
562.23356	197	197	116	95	66	37	5311574	5311574	5133167	4983000	4465735	3441307	197	265593	5311574	50.57	63414	35778	23	50	0		197	5311574	50.57	5392		5104	99.65	0.31	TRUE
562.23357	148	148	78	61	49	32	5108761	5108761	4950425	4833503	4644915	4070300	148	260612	5108761	50.52	129172	64801	14	28	0		148	5108761	50.52	5165		4903	99.96	1.12	TRUE
562.23358	122	122	62	53	36	29	5025721	5025721	4877771	4817643	4524255	4281818	122	381297	5025721	50.42	148620	96453	12	23	0		122	5025721	50.42	4971		4712	99.96	0.08	TRUE
562.23359	113	113	61	52	35	27	5101897	5101897	4985535	4922516	4646578	4348548	113	362480	5101897	50.79	166801	107847	12	21	0		113	5101897	50.79	5090		4826	99.96	0.11	TRUE
562.2336	51	51	37	32	28	21	4870140	4870140	4833788	4796980	4728511	4477769	51	566144	4870140	50.47	240249	188174	8	13	0		51	4870140	50.47	4774		4538	99.96	0.39	TRUE
562.23361	62	62	39	35	30	23	4882948	4882948	4824032	4796085	4724896	4468363	62	540625	4882948	50.52	198583	113645	7	15	0		62	4882948	50.52	4768		4555	99.96	0.08	TRUE
562.23362	131	131	76	60	39	28	5129500	5129500	5010731	4899925	4553424	4166121	131	344380	5129500	50.72	170043	62091	11	23	0		131	5129500	50.72	5190		4885	99.96	0.39	TRUE
562.23363	52	52	42	34	28	19	5038694	5038694	5018124	4964537	4857952	4555292	52	527682	5038694	50.57	287995	189715	7	13	0		52	5038694	50.57	4968		4724	99.96	0.08	TRUE
562.23364	108	108	68	56	40	31	4973319	4973319	4883973	4793694	4529179	4206818	108	316549	4973319	50.74	131752	67535	12	23	0		108	4973319	50.74	4973		4709	99.88	0.39	TRUE
562.23365	117	117	68	58	40	32	5220181	5220181	5109511	5040083	4724379	4411204	117	280767	5220181	50.74	149826	87086	14	26	0		117	5220181	50.74	5230		4968	99.96	0.11	TRUE
562.23366	75	75	55	49	42	27	4728673	4728673	4694234	4650505	4537830	4002247	75	435455	4728673	50.74	162829	82917	10	21	0		75	4728673	50.74	4679		4477	99.96	0.11	TRUE
562.23367	83	83	54	49	39	27	5223829	5223829	5160244	5122476	4964984	4523984	83	538076	5223829	50.35	192538	97927	9	19	0		83	5223829	50.35	5161		4893	99.96	0.31	TRUE
562.23368	71	71	53	48	43	33	4838979	4838979	4798010	4763403	4670570	4313898	71	336083	4838979	50.54	130157	87477	12	24	0.02		71	4838979	50.54	4678		4464	99.96	0.45	TRUE
562.23369	114	114	75	61	49	30	4823007	4823007	4736785	4634753	4443986	3712249	114	464507	4823007	50.63	117711	53306	12	29	0		114	4823007	50.63	4812		4534	99.96	0.62	TRUE
562.2337	127	127	88	72	51	31	5175468	5175468	5080240	4976401	4629405	3954131	127	351731	5175468	50.61	106895	55528	15	30	0.02		127	5175468	50.61	5116		4857	99.96	0.13	TRUE
562.23371	98	98	64	55	35	29	5163041	5163041	5078983	5017712	4689653	4456204	98	319346	5163041	50.68	173926	106034	12	22	0		98	5163041	50.68	5167		4904	99.96	0.64	TRUE
562.23372	172	172	97	77	50	36	5293055	5293055	5124779	4978878	4494856	4008220	172	351571	5293055	50.52	104287	50110	16	36	0		172	5293055	50.52	5354		5074	99.96	0.31	TRUE
562.23373	85	85	56	50	44	31	5037504	5037504	4973930	4937034	4844240	4395414	85	451301	5037504	50.67	145563	75804	11	22	0		85	5037504	50.67	4917		4658	99.65	0.08	TRUE
562.23374	65	65	43	39	32	23	5113899	5113899	5064935	5034866	4921694	4587938	65	519709	5113899	50.61	203869	133135	8	15	0		65	5113899	50.61	5119		4836	99.96	0.62	TRUE
562.23375	108	108	63	50	34	27	5120097	5120097	5017398	4928235	4655440	4386750	108	325604	5120097	50.81	173037	107080	12	21	0		108	5120097	50.81	5126		4846	99.96	0.08	TRUE
562.23376	117	117	71	53	36	23	5083270	5083270	4977462	4851465	4586613	4139710	117	460065	5083270	50.55	172452	106405	10	19	0		117	5083270	50.55	5129		4839	99.96	0.62	TRUE
562.23377	106	106	61	52	37	29	5169225	5169225	5068757	4995624	4743291	4444624	106	325625	5169225	50.75	159842	106261	13	22	0		106	5169225	50.75	5155		4895	99.96	0.11	TRUE
562.23378	79	79	54	44	34	26	5075479	5075479	5010024	4931918	4787591	4514957	79	539538	5075479	50.52	202889	106796	8	18	0		79	5075479	50.52	5084		4815	99.88	0.08	TRUE
562.23379	57	57	37	33	32	23	4976543	4976543	4928695	4897218	4887116	4554791	57	426176	4976543	50.89	226973	151199	8	15	0		57	4976543	50.89	4842		4615	99.96	0.76	TRUE
562.2338	122	122	63	54	38	28	5071377	5071377	4951317	4891753	4627632	4277531	122	438233	5071377	50.32	168629	80205	9	21	0		122	5071377	50.32	5081		4788	99.96	0.12	TRUE
562.23381	86	86	54	44	34	26	5058674	5058674	4983385	4909285	4763321	4498253	86	515806	5058674	50.49	199059	103436	9	18	0		86	5058674	50.49	5023		4736	99.96	0.08	TRUE
562.23382	64	64	46	40	31	22	4953499	4953499	4911406	4866701	4701084	4409066	64	493174	4953499	50.53	198453	127478	8	15	0		64	4953499	50.53	4849		4606	99.96	0.08	TRUE
562.23383	103	103	68	60	45	24	4962778	4962778	4882569	4824413	4566696	3791725	103	465822	4962778	50.61	148040	52549	10	23	0		103	4962778	50.61	4964		4701	99.88	0.18	TRUE
562.23384	120	120	74	65	42	23	5271537	5271537	5167646	5106354	4724185	4015587	120	387452	5271537	50.43	163569	69232	11	23	0		120	5271537	50.43	5304		5026	99.96	0.31	TRUE
562.23385	129	129	78	67	51	31	5115918	5115918	4993227	4916845	4652196	3897159	129	291535	5115918	50.75	121728	52539	15	30	0.02		129	5115918	50.75	5136		4888	99.96	0.92	TRUE
562.23386	113	113	65	51	39	27	5161668	5161668	5053492	4965715	4787300	4399257	113	430125	5161668	50.3	152390	101124	11	21	0.04		113	5161668	50.3	5166		4857	99.96	0.08	TRUE
562.23387	123	123	75	63	49	35	5280732	5280732	5177842	5086969	4881603	4380028	123	260274	5280732	50.57	126099	71987	15	29	0		123	5280732	50.57	5242		4936	99.96	0.12	TRUE
562.23388	104	104	61	47	31	24	5092743	5092743	4994429	4895131	4644160	4394468	104	524820	5092743	50.45	186697	105237	8	18	0		104	5092743	50.45	5076		4778	99.96	0.08	TRUE
562.23389	180	180	102	88	59	35	5223141	5223141	5044709	4948735	4524534	3702234	180	204541	5223141	50.57	102897	42500	20	40	0		180	5223141	50.57	5316		5055	99.96	0.39	TRUE
562.2339	73	73	50	44	36	29	4911907	4911907	4867315	4820932	4699081	4451982	73	418276	4911907	50.46	165226	97970	11	20	0		73	4911907	50.46	4803		4573	99.96	0.08	TRUE
562.23391	152	152	104	86	53	29	5216987	5216987	5094504	4972882	4455622	3591829	152	345546	5216987	50.52	90249	39467	15	37	0		152	5216987	50.52	5147		4891	99.96	0.62	TRUE
562.23392	122	122	66	57	42	28	5132084	5132084	4999180	4935957	4708147	4238464	122	353722	5132084	50.54	197164	73818	11	22	0		122	5132084	50.54	5100		4824	99.96	0.08	TRUE
562.23393	92	92	65	54	35	29	5112119	5112119	5039529	4957853	4663327	4435872	92	433471	5112119	50.72	165175	109360	12	21	0		92	5112119	50.72	5134		4875	99.96	0.08	TRUE
562.23394	95	95	54	42	30	22	5196350	5196350	5114333	5020982	4832774	4562527	95	537700	5196350	50.38	239096	113375	8	15	0		95	5196350	50.38	5182		4910	99.96	0.08	TRUE
562.23395	141	141	66	54	34	27	5210085	5210085	5052213	4964480	4661086	4413701	141	424788	5210085	50.79	178678	96478	11	21	0		141	5210085	50.79	5266		4984	99.96	0.08	TRUE
562.23396	104	104	63	57	33	26	5166395	5166395	5078657	5035929	4646117	4400502	104	408174	5166395	50.76	178679	109366	11	20	0		104	5166395	50.76	5196		4918	99.96	0.62	TRUE
562.23397	101	101	60	47	39	27	5097265	5097265	5017849	4927605	4800108	4364527	101	451960	5097265	50.59	173576	87992	10	20	0		101	5097265	50.59	5149		4883	99.96	0.93	TRUE
562.23398	114	114	63	51	37	27	5158648	5158648	5051172	4972922	4727653	4351067	114	346258	5158648	50.7	173801	96379	11	21	0		114	5158648	50.7	5192		4917	99.96	0.08	TRUE
562.23399	113	113	67	51	37	26	5137920	5137920	5038941	4933594	4701731	4345980	113	424911	5137920	50.71	178534	109329	11	20	0		113	5137920	50.71	5146		4871	99.96	0.31	TRUE
562.234	104	104	81	75	53	31	4622930	4622930	4574650	4524225	4124428	3342111	104	246875	4622930	50.91	82029	44200	16	34	0		104	4622930	50.91	4571		4369	99.65	0.11	TRUE
562.23401	70	70	53	44	37	27	5106406	5106406	5069099	5009600	4887018	4528086	70	392029	5106406	50.7	186440	109372	10	19	0.04		70	5106406	50.7	5122		4868	99.96	0.08	TRUE
562.23402	117	117	71	59	48	30	5016340	5016340	4927568	4838306	4654520	4030039	117	296586	5016340	50.58	131016	55418	13	26	0		117	5016340	50.58	4954		4699	99.96	0.62	TRUE
562.23403	159	159	70	59	38	28	5253506	5253506	5052380	4978484	4640669	4295507	159	388691	5253506	50.67	159842	82220	12	23	0		159	5253506	50.67	5317		5022	99.96	0.31	TRUE
562.23404	89	89	63	57	46	33	4768809	4768809	4715602	4667735	4490666	4009184	89	355642	4768809	50.8	128889	62194	12	26	0		89	4768809	50.8	4763		4507	99.96	0.45	TRUE
562.23405	115	115	70	58	37	30	5127597	5127597	5040311	4961313	4630303	4388055	115	433442	5127597	50.81	157133	96379	13	23	0		115	5127597	50.81	5153		4873	99.96	0.08	TRUE
562.23406	73	73	49	45	40	32	4918502	4918502	4867279	4835126	4727422	4418430	73	388857	4918502	50.55	140244	88630	11	22	0		73	4918502	50.55	4838		4608	99.96	0.08	TRUE
562.23407	56	56	41	38	33	24	4994647	4994647	4959054	4938089	4850445	4530375	56	882586	4994647	50.24	225402	114165	7	14	0.02		56	4994647	50.24	4980		4750	99.96	0.08	TRUE
562.23408	109	109	60	50	39	27	5260769	5260769	5150320	5080916	4918137	4498441	109	405831	5260769	50.35	184226	104420	11	20	0		109	5260769	50.35	5274		4943	99.96	0.08	TRUE
562.23409	111	111	62	54	37	25	5161834	5161834	5052966	4997734	4730624	4316034	111	501775	5161834	50.4	170060	98108	9	19	0.02		111	5161834	50.4	5202		4905	99.96	0.17	TRUE
562.2341	150	150	70	55	41	30	5355839	5355839	5191487	5093908	4880804	4469202	150	424810	5355839	50.82	159842	79152	13	25	0.02		150	5355839	50.82	5460		5175	99.96	0.08	TRUE
562.23411	134	134	69	59	40	28	5095376	5095376	4949725	4884334	4597179	4203265	134	401987	5095376	50.44	138180	94850	11	22	0		134	5095376	50.44	5039		4757	99.96	0.08	TRUE
562.23412	119	119	64	53	45	31	5280221	5280221	5162698	5085100	4959129	4461068	119	425838	5280221	50.59	162612	84755	12	24	0		119	5280221	50.59	5385		5104	99.96	0.93	TRUE
562.23413	120	120	78	67	42	29	5279135	5279135	5186653	5107478	4742175	4284798	120	319452	5279135	50.69	159843	82169	13	24	0		120	5279135	50.69	5380		5072	99.96	0.08	TRUE
562.23414	95	95	56	44	36	24	5084333	5084333	5004179	4922770	4788128	4365046	95	515018	5084333	50.42	178015	113168	9	18	0		95	5084333	50.42	5143		4855	99.96	0.99	TRUE
562.23415	172	172	88	72	50	29	5295191	5295191	5101935	4988682	4625750	3896220	172	343590	5295191	50.38	128178	47377	13	31	0		172	5295191	50.38	5336		5030	99.96	0.08	TRUE
562.23416	35	35	28	26	23	19	4731941	4731941	4716812	4705530	4650792	4519923	35	630277	4731941	50.49	439297	181840	5	10	0		35	4731941	50.49	4627		4401	99.96	0.08	TRUE
562.23417	81	81	60	45	38	24	5081114	5081114	5028602	4916239	4805722	4327102	81	539726	5081114	50.61	194287	95576	8	18	0		81	5081114	50.61	5077		4806	99.96	0.08	TRUE
562.23418	103	103	62	53	38	27	4976664	4976664	4877186	4812280	4569298	4192380	103	354541	4976664	50.47	149822	102426	11	21	0		103	4976664	50.47	4919		4653	99.96	0.08	TRUE
562.23419	125	125	68	59	41	29	5049280	5049280	4920380	4852144	4589536	4152925	125	319997	5049280	50.46	174144	77059	12	24	0		125	5049280	50.46	5060		4788	99.94	0.08	TRUE
562.2342	120	120	84	72	51	30	5152836	5152836	5067794	4981704	4646248	3879214	120	381529	5152836	50.68	129074	53368	13	30	0		120	5152836	50.68	5115		4865	99.96	0.13	TRUE
562.23421	124	124	69	59	40	26	5061786	5061786	4927018	4851327	4549571	4054221	124	401985	5061786	50.42	140195	72534	11	22	0		124	5061786	50.42	5003		4723	99.96	0.08	TRUE
562.23422	90	90	63	49	37	26	4998047	4998047	4923182	4825262	4608543	4227558	90	435177	4998047	50.4	185580	98725	9	19	0		90	4998047	50.4	4920		4642	99.96	0.08	TRUE
562.23423	102	102	56	45	33	23	5047885	5047885	4938118	4854909	4679872	4337288	102	483993	5047885	50.42	186599	113085	9	17	0		102	5047885	50.42	4989		4707	99.96	0.08	TRUE
562.23424	42	42	32	31	29	20	4973670	4973670	4946054	4939347	4904905	4586466	42	919613	4973670	50.38	322834	178640	5	11	0		42	4973670	50.38	4938		4705	99.81	0.08	TRUE
562.23425	136	136	79	64	47	30	5239237	5239237	5102893	4995787	4732580	4131845	136	357329	5239237	50.49	113062	60796	14	27	0		136	5239237	50.49	5301		4989	99.65	0.39	TRUE
562.23426	132	132	67	56	40	28	5091696	5091696	4943731	4868766	4629191	4238035	132	401987	5091696	50.45	138180	94840	11	22	0		132	5091696	50.45	5036		4755	99.96	0.08	TRUE
562.23427	66	66	45	41	34	26	5075137	5075137	5029022	5001797	4866955	4565182	66	385798	5075137	50.42	195885	122875	10	17	0.02		66	5075137	50.42	5099		4803	99.96	0.42	TRUE
562.23428	103	103	63	48	32	25	5213176	5213176	5126244	5031758	4769328	4507798	103	424681	5213176	50.67	186426	111839	10	19	0		103	5213176	50.67	5230		4965	99.96	0.58	TRUE
562.23429	52	52	37	35	34	26	4741952	4741952	4712241	4698335	4685028	4406623	52	441481	4741952	50.76	187334	129663	9	16	0		52	4741952	50.76	4655		4464	99.96	0.39	TRUE
562.2343	113	113	75	65	47	32	5070164	5070164	4971518	4899061	4641970	4122416	113	384863	5070164	50.57	118633	70474	14	27	0		113	5070164	50.57	5067		4795	99.96	0.08	TRUE
562.23431	71	71	42	38	30	22	5019375	5019375	4944808	4914558	4798842	4548783	71	468488	5019375	50.49	251439	138675	7	15	0		71	5019375	50.49	4998		4719	99.96	0.45	TRUE
562.23432	141	141	89	79	54	29	4860222	4860222	4741862	4676504	4237403	3336017	141	249262	4860222	50.57	93862	40513	17	37	0		141	4860222	50.57	4835		4580	100	0.16	TRUE
562.23433	110	110	71	59	47	32	4904014	4904014	4814651	4732316	4539647	4012621	110	286063	4904014	50.68	133428	61866	14	27	0		110	4904014	50.68	4903		4645	99.96	0.08	TRUE
562.23434	90	90	57	52	43	30	5144926	5144926	5073006	5041550	4894805	4420780	90	489787	5144926	50.59	158185	76680	10	22	0		90	5144926	50.59	5071		4803	99.96	0.39	TRUE
562.23435	216	216	116	94	56	29	5468233	5468233	5249029	5101693	4474093	3472889	216	345328	5468233	50.34	74072	35926	17	44	0		216	5468233	50.34	5575		5235	99.65	0.28	TRUE
562.23436	122	122	86	68	48	31	5307058	5307058	5225986	5102122	4740620	4117305	122	395997	5307058	50.63	130349	55930	13	29	0		122	5307058	50.63	5279		4996	99.96	0.48	TRUE
562.23437	142	142	81	67	52	30	5008406	5008406	4861164	4761736	4535450	3748705	142	339136	5008406	50.46	116269	49230	15	31	0		142	5008406	50.46	5061		4746	99.96	0.13	TRUE
562.23438	153	153	95	75	52	34	4996601	4996601	4850998	4715291	4325860	3664935	153	258778	4996601	50.59	91556	44428	18	36	0		153	4996601	50.59	5052		4793	99.96	0.31	TRUE
562.23439	50	50	33	32	28	21	4941221	4941221	4900389	4892366	4815015	4578622	50	743326	4941221	50.57	243220	187863	7	13	0		50	4941221	50.57	4837		4609	99.96	0.08	TRUE
562.2344	96	96	58	51	41	32	5115038	5115038	5022485	4972310	4816990	4534132	96	349063	5115038	50.72	163962	88405	12	23	0		96	5115038	50.72	5038		4801	99.96	0.13	TRUE
562.23441	137	137	84	69	46	29	5258114	5258114	5122876	5012791	4643880	4032209	137	395993	5258114	50.53	138434	56041	13	28	0		137	5258114	50.53	5246		4947	99.96	0.13	TRUE
562.23442	103	103	56	44	34	23	5043619	5043619	4932271	4845001	4699597	4306841	103	575231	5043619	50.41	185580	108899	9	17	0		103	5043619	50.41	4976		4707	99.96	0.08	TRUE
562.23443	127	127	91	81	59	29	4857298	4857298	4784662	4712399	4320244	3246743	127	205621	4857298	50.84	97550	38841	17	39	0		127	4857298	50.84	4809		4613	99.96	0.11	TRUE
562.23444	92	92	57	50	36	25	4956142	4956142	4884511	4842045	4631429	4273711	92	412719	4956142	50.54	189249	97256	8	17	0		92	4956142	50.54	4954		4696	99.96	0.62	TRUE
562.23445	105	105	57	42	34	27	5186263	5186263	5081054	4980965	4844939	4609990	105	432712	5186263	50.6	185986	108125	9	18	0		105	5186263	50.6	5269		4963	99.96	0.62	TRUE
562.23446	113	113	57	49	36	26	5136415	5136415	5023931	4966638	4765063	4430661	113	467964	5136415	50.17	166994	101779	9	18	0		113	5136415	50.17	5151		4855	99.96	0.08	TRUE
562.23447	120	120	69	60	44	33	5451186	5451186	5341937	5279812	4995078	4602541	120	359167	5451186	50.37	138726	69450	12	25	0		120	5451186	50.37	5461		5163	99.88	0.31	TRUE
562.23448	129	129	73	60	44	28	5137101	5137101	5015176	4916830	4656619	4054123	129	342961	5137101	50.55	133886	55243	12	25	0		129	5137101	50.55	5123		4844	99.88	0.62	TRUE
562.23449	102	102	55	45	35	25	5025063	5025063	4919717	4852365	4711405	4377445	102	539609	5025063	50.63	186013	108342	9	18	0		102	5025063	50.63	5015		4755	99.88	0.39	TRUE
562.2345	171	171	96	78	52	35	5211852	5211852	5038541	4909052	4461260	3879607	171	311292	5211852	50.5	104287	46484	16	36	0		171	5211852	50.5	5225		4958	99.96	0.31	TRUE
562.23451	86	86	55	48	35	28	5070589	5070589	4996321	4948906	4723706	4466587	86	362480	5070589	50.79	178670	96094	11	21	0		86	5070589	50.79	5033		4777	99.96	0.11	TRUE
562.23452	92	92	64	57	44	31	4868402	4868402	4807968	4760798	4552711	4037439	92	401684	4868402	50.59	125472	63756	12	25	0		92	4868402	50.59	4834		4590	99.96	0.08	TRUE
562.23453	67	67	39	37	33	24	4699249	4699249	4634902	4619462	4535909	4215267	67	510830	4699249	50.76	192897	119932	9	16	0		67	4699249	50.76	4608		4424	99.96	0.08	TRUE
562.23454	90	90	57	50	35	28	5072598	5072598	4996178	4948763	4690730	4433611	90	362414	5072598	50.79	173037	95160	11	21	0.02		90	5072598	50.79	5039		4779	99.96	0.11	TRUE
562.23455	58	58	39	36	31	23	5119539	5119539	5071334	5050833	4964197	4691118	58	496645	5119539	50.35	221916	139478	8	14	0		58	5119539	50.35	5089		4816	99.96	0.08	TRUE
562.23456	73	73	52	49	39	24	4668347	4668347	4613985	4589829	4422963	3905727	73	452400	4668347	50.73	180446	89954	10	19	0		73	4668347	50.73	4514		4309	99.96	0.08	TRUE
562.23457	87	87	60	52	36	28	5137756	5137756	5065482	5012127	4735708	4444569	87	430760	5137756	50.84	180590	106163	11	21	0		87	5137756	50.84	5175		4882	99.96	0.31	TRUE
562.23458	87	87	58	47	32	27	5059533	5059533	4986933	4908777	4663302	4470408	87	361993	5059533	50.79	180797	106034	11	20	0		87	5059533	50.79	5024		4766	99.96	0.11	TRUE
562.23459	130	130	73	62	42	31	5247083	5247083	5120833	5041851	4708598	4334698	130	375356	5247083	50.49	141429	77317	13	26	0		130	5247083	50.49	5282		4971	99.96	0.08	TRUE
562.2346	57	57	41	36	33	21	4998808	4998808	4965611	4928461	4876735	4439698	57	497507	4998808	50.63	235582	133927	7	14	0		57	4998808	50.63	4978		4721	99.96	0.93	TRUE
562.23461	126	126	71	59	40	32	5178194	5178194	5056265	4972901	4649915	4350394	126	280767	5178194	50.81	141943	96379	15	26	0		126	5178194	50.81	5180		4915	99.96	0.11	TRUE
562.23462	105	105	61	56	45	28	5122211	5122211	5013646	4980877	4784852	4181777	105	451319	5122211	50.55	158175	70870	10	23	0		105	5122211	50.55	5070		4801	99.96	0.36	TRUE
562.23463	111	111	65	54	36	30	5216616	5216616	5113076	5035721	4718472	4494173	111	319162	5216616	50.73	159114	107847	13	23	0		111	5216616	50.73	5236		4967	99.96	0.11	TRUE
562.23464	108	108	59	43	31	21	5082518	5082518	4973954	4857232	4666764	4335914	108	561821	5082518	50.49	186735	119421	9	16	0		108	5082518	50.49	5034		4764	99.96	0.08	TRUE
562.23465	121	121	71	61	46	30	5086823	5086823	4982624	4917573	4684681	4110310	121	383368	5086823	50.6	130984	68250	12	26	0		121	5086823	50.6	5064		4789	99.96	0.39	TRUE
562.23466	79	79	54	47	35	25	5235105	5235105	5179071	5133704	4937488	4568676	79	664724	5235105	50.54	185987	109320	8	17	0		79	5235105	50.54	5266		4954	99.96	0.62	TRUE
562.23467	115	115	82	69	47	31	5154742	5154742	5075927	4985333	4629771	4056378	115	395997	5154742	50.69	135386	55713	13	28	0		115	5154742	50.69	5128		4875	99.96	0.13	TRUE
562.23468	97	97	62	52	35	24	5083259	5083259	5003331	4923393	4636580	4230631	97	390808	5083259	50.66	188336	92565	10	18	0		97	5083259	50.66	5063		4781	99.88	0.08	TRUE
562.23469	132	132	78	64	41	27	5330693	5330693	5208500	5113988	4744953	4212887	132	409620	5330693	50.38	164812	87956	13	25	0		132	5330693	50.38	5595		5246	99.96	0.08	TRUE
562.2347	163	163	99	83	55	33	5172641	5172641	5015438	4901076	4456391	3665789	163	278918	5172641	50.68	86771	43506	17	38	0		163	5172641	50.68	5148		4891	99.96	0.08	TRUE
562.23471	125	125	65	53	38	22	5145097	5145097	5006444	4917297	4681030	4143817	125	538171	5145097	50.34	184447	94840	9	19	0		125	5145097	50.34	5124		4827	99.96	0.08	TRUE
562.23472	141	141	84	67	50	30	5104664	5104664	4967328	4848952	4575224	3859060	141	340071	5104664	50.42	130357	51459	14	30	0		141	5104664	50.42	5187		4856	99.88	0.08	TRUE
562.23473	142	142	91	70	51	32	5296001	5296001	5171990	5022881	4698562	4019185	142	390934	5296001	50.63	102865	53368	15	32	0		142	5296001	50.63	5327		5055	99.96	0.13	TRUE
562.23474	92	92	55	49	33	26	5098896	5098896	5012588	4967901	4703993	4434599	92	424815	5098896	50.79	178679	109329	11	20	0		92	5098896	50.79	5094		4838	99.96	0.08	TRUE
562.23475	73	73	46	40	33	25	5019932	5019932	4943511	4906599	4795701	4512240	73	529112	5019932	50.45	204706	126457	8	15	0		73	5019932	50.45	4955		4677	99.96	0.08	TRUE
562.23476	169	169	85	67	55	34	5114404	5114404	4935779	4801118	4587035	3816038	169	357689	5114404	50.61	93029	47986	15	35	0		169	5114404	50.61	5234		4922	99.96	0.08	TRUE
562.23477	86	86	65	60	51	34	4663626	4663626	4621671	4585304	4420440	3806557	86	295628	4663626	50.65	119299	59554	14	29	0		86	4663626	50.65	4580		4366	99.96	0.08	TRUE
562.23478	91	91	61	52	38	31	5211187	5211187	5140137	5078756	4835340	4579351	91	390149	5211187	50.79	165717	96116	12	22	0		91	5211187	50.79	5255		4980	99.96	0.08	TRUE
562.23479	78	78	50	42	34	25	5155535	5155535	5089666	5030282	4925129	4614469	78	519966	5155535	50.55	189386	124876	8	16	0.02		78	5155535	50.55	5191		4900	99.96	0.62	TRUE
562.2348	103	103	59	49	34	27	5071437	5071437	4979383	4906765	4656878	4394387	103	424744	5071437	50.82	173799	100973	11	20	0		103	5071437	50.82	5049		4808	99.96	0.08	TRUE
562.23481	126	126	83	64	44	26	5479476	5479476	5387667	5250687	4907883	4206734	126	429736	5479476	50.32	131243	69101	11	25	0		126	5479476	50.32	5615		5301	99.96	0.62	TRUE
562.23482	72	72	48	36	29	20	5000906	5000906	4951029	4858765	4745964	4444682	72	496990	5000906	50.48	238971	130658	7	14	0		72	5000906	50.48	4944		4683	99.96	0.08	TRUE
562.23483	79	79	57	50	39	27	5178044	5178044	5124458	5078163	4908873	4486554	79	308623	5178044	50.7	180628	101655	12	21	0		79	5178044	50.7	5223		4951	99.96	0.08	TRUE
562.23484	127	127	81	69	50	30	5189658	5189658	5090500	5012625	4687541	3957201	127	422517	5189658	50.74	106895	53368	13	29	0		127	5189658	50.74	5149		4868	99.96	0.13	TRUE
562.23485	127	127	72	56	38	24	5150575	5150575	5017659	4913332	4583743	4072340	127	373935	5150575	50.47	166724	84881	10	21	0		127	5150575	50.47	5137		4869	99.96	0.31	TRUE
562.23486	113	113	66	56	44	29	5189119	5189119	5081757	5013283	4806052	4279197	113	451317	5189119	50.57	134250	76680	11	23	0.04		113	5189119	50.57	5143		4861	99.96	0.35	TRUE
562.23487	108	108	65	52	33	26	5211813	5211813	5116138	5031811	4727465	4457886	108	319552	5211813	50.67	181806	109221	11	20	0		108	5211813	50.67	5243		4969	99.96	0.58	TRUE
562.23488	84	84	59	51	35	26	5094973	5094973	5031529	4980891	4732593	4435106	84	433611	5094973	50.75	178679	117879	11	19	0.02		84	5094973	50.75	5076		4812	99.96	0.62	TRUE
562.23489	100	100	54	45	32	24	5018092	5018092	4928428	4866929	4657753	4353919	100	534057	5018092	50.56	202447	114322	9	17	0		100	5018092	50.56	4950		4703	99.96	0.08	TRUE
562.2349	66	66	45	44	39	28	4743103	4743103	4695342	4687695	4600344	4226441	66	498838	4743103	50.7	167680	106311	10	19	0.02		66	4743103	50.7	4656		4453	99.96	0.08	TRUE
562.23491	122	122	65	56	44	32	5070315	5070315	4947112	4879927	4676563	4220658	122	295482	5070315	50.6	144052	74537	13	26	0		122	5070315	50.6	5123		4831	99.94	0.08	TRUE
562.23492	64	64	47	42	35	25	5026538	5026538	4988906	4951739	4832264	4489003	64	519710	5026538	50.54	173784	129362	9	17	0		64	5026538	50.54	5021		4750	99.96	0.62	TRUE
562.23493	71	71	55	49	41	31	5118340	5118340	5082532	5043763	4911000	4583864	71	392042	5118340	50.66	175524	87090	11	21	0		71	5118340	50.66	5121		4850	99.96	0.08	TRUE
562.23494	151	151	106	87	53	28	5291575	5291575	5192678	5060328	4513105	3629376	151	372876	5291575	50.54	84792	38859	14	36	0		151	5291575	50.54	5251		4975	99.96	0.66	TRUE
562.23495	150	150	82	58	46	32	5219756	5219756	5072166	4902489	4712708	4199396	150	281879	5219756	50.5	123964	65749	14	28	0		150	5219756	50.5	5375		5050	99.96	0.65	TRUE
562.23496	121	121	67	52	39	27	5132196	5132196	5007490	4900925	4696019	4275342	121	386909	5132196	50.57	166896	101991	12	21	0		121	5132196	50.57	5164		4881	99.96	0.39	TRUE
562.23497	104	104	70	66	54	31	5002725	5002725	4923962	4895845	4686616	3830667	104	361783	5002725	50.42	107793	52810	14	30	0		104	5002725	50.42	4948		4700	99.96	0.31	TRUE
562.23498	90	90	47	41	32	25	5088250	5088250	4995379	4956622	4821254	4585799	90	475687	5088250	50.58	221737	114520	7	15	0		90	5088250	50.58	5049		4768	99.96	0.08	TRUE
562.23499	92	92	58	52	40	26	4985694	4985694	4917774	4873546	4657127	4155826	92	386767	4985694	50.48	170099	100094	12	21	0		92	4985694	50.48	4903		4666	99.96	0.85	TRUE
562.235	126	126	67	53	38	27	5112640	5112640	4972741	4868804	4625028	4233637	126	388894	5112640	50.49	162004	90710	11	22	0		126	5112640	50.49	5185		4899	99.96	0.08	TRUE
562.23501	109	109	62	52	35	28	5131816	5131816	5026099	4955085	4670610	4402271	109	325586	5131816	50.8	165175	106261	12	22	0		109	5131816	50.8	5122		4851	99.96	0.11	TRUE
562.23502	92	92	66	59	42	28	5010038	5010038	4940091	4887026	4619462	4112833	92	361186	5010038	50.45	141405	98725	13	24	0		92	5010038	50.45	4930		4656	99.96	0.08	TRUE
562.23503	129	129	84	66	51	33	5113683	5113683	5012044	4891489	4639893	3985477	129	264946	5113683	50.7	121585	56019	14	31	0		129	5113683	50.7	5047		4805	99.96	0.13	TRUE
562.23504	176	176	116	91	55	30	5201871	5201871	5078667	4909143	4309863	3390127	176	250554	5201871	50.43	94727	34682	19	42	0		176	5201871	50.43	5352		5066	99.96	0.08	TRUE
562.23505	117	117	67	55	38	28	5149117	5149117	5035189	4942596	4655554	4291680	117	325619	5149117	50.78	165297	98389	12	23	0		117	5149117	50.78	5160		4892	99.96	0.11	TRUE
562.23506	72	72	47	41	33	23	5113186	5113186	5062114	5019681	4906629	4535659	72	519977	5113186	50.55	189217	129155	8	16	0		72	5113186	50.55	5120		4839	99.96	0.62	TRUE
562.23507	90	90	58	52	44	30	5086279	5086279	5014556	4975439	4833560	4328150	90	451301	5086279	50.57	151941	72069	11	22	0		90	5086279	50.57	4978		4715	99.96	0.08	TRUE
562.23508	71	71	52	45	33	25	5082149	5082149	5034381	4983141	4808585	4519011	71	474882	5082149	50.72	189607	117783	9	17	0		71	5082149	50.72	5057		4800	99.96	0.31	TRUE
562.23509	68	68	56	53	40	28	4687026	4687026	4653439	4633032	4408815	4003613	68	343985	4687026	50.71	137788	96477	12	22	0		68	4687026	50.71	4595		4380	99.96	0.08	TRUE
562.2351	125	125	72	59	47	30	4983705	4983705	4872748	4788600	4595669	3953792	125	393315	4983705	50.61	124217	59988	12	26	0		125	4983705	50.61	5035		4734	99.96	0.13	TRUE
562.23511	87	87	60	52	47	32	4721868	4721868	4659197	4600495	4525284	3925967	87	416353	4721868	50.48	119187	59986	12	26	0		87	4721868	50.48	4763		4500	99.96	0.12	TRUE
562.23512	101	101	59	46	36	23	4950593	4950593	4856834	4769288	4628194	4167240	101	404619	4950593	50.5	185986	101977	9	17	0		101	4950593	50.5	4949		4680	99.96	0.62	TRUE
562.23513	95	95	48	38	29	25	5064547	5064547	4946211	4879268	4732870	4595929	95	503037	5064547	50.59	221546	114520	7	15	0		95	5064547	50.59	5007		4719	99.96	0.08	TRUE
562.23514	140	140	97	85	58	27	4860194	4860194	4766462	4675353	4204070	3090118	140	283881	4860194	50.61	83908	38464	18	40	0		140	4860194	50.61	4834		4590	99.69	0.83	TRUE
562.23515	74	74	45	42	36	23	4653901	4653901	4585144	4565159	4452106	3957507	74	501529	4653901	50.64	186590	128023	9	17	0		74	4653901	50.64	4608		4399	99.96	0.3	TRUE
562.23516	73	73	47	41	34	23	5074107	5074107	5018535	4975110	4876476	4474594	73	519961	5074107	50.5	189396	121068	8	16	0		73	5074107	50.5	5085		4819	99.96	0.62	TRUE
562.23517	110	110	59	51	38	25	4964325	4964325	4849568	4795483	4614824	4158994	110	404619	4964325	50.5	185986	90206	9	19	0		110	4964325	50.5	4978		4699	99.96	0.93	TRUE
562.23518	79	79	54	43	32	24	4964169	4964169	4911951	4838501	4642623	4376175	79	423132	4964169	50.53	186027	122774	9	17	0		79	4964169	50.53	4941		4677	99.96	0.68	TRUE
562.23519	60	60	46	40	32	22	5018108	5018108	4985501	4940425	4807838	4460238	60	519708	5018108	50.52	194301	130923	8	15	0		60	5018108	50.52	4967		4692	99.96	0.62	TRUE
562.2352	107	107	70	61	50	37	5012442	5012442	4927580	4863583	4670066	4228519	107	262631	5012442	50.55	120607	64990	15	29	0		107	5012442	50.55	4947		4705	99.96	0.08	TRUE
562.23521	88	88	63	51	39	30	5064392	5064392	5011696	4924277	4730241	4414754	88	418279	5064392	50.59	159011	81077	11	22	0		88	5064392	50.59	4972		4735	99.96	0.13	TRUE
562.23522	43	43	27	26	26	19	4610231	4610231	4568802	4563237	4563237	4299809	43	502451	4610231	50.63	266790	182812	7	12	0		43	4610231	50.63	4470		4298	99.96	0.39	TRUE
562.23523	92	92	54	42	31	22	5124227	5124227	5035671	4942512	4757694	4450436	92	587950	5124227	50.4	202447	114520	8	16	0		92	5124227	50.4	5085		4809	99.96	0.08	TRUE
562.23524	107	107	69	54	46	31	4850049	4850049	4769335	4670063	4538469	3995490	107	288089	4850049	50.8	123328	75308	13	25	0		107	4850049	50.8	4798		4537	99.96	0.08	TRUE
562.23525	132	132	90	75	50	28	5223422	5223422	5119014	5012322	4602879	3806612	132	345140	5223422	50.63	146580	45933	14	31	0		132	5223422	50.63	5224		4958	99.96	0.13	TRUE
562.23526	144	144	74	62	38	24	5171366	5171366	4999559	4915988	4526172	4007576	144	526762	5171366	50.39	145960	84611	11	23	0		144	5171366	50.39	5170		4871	99.96	0.08	TRUE
562.23527	81	81	59	45	35	23	4952228	4952228	4906961	4813685	4661194	4218397	81	498478	4952228	50.44	185986	113159	9	17	0		81	4952228	50.44	4927		4649	99.96	0.62	TRUE
562.23528	74	74	50	47	37	26	5186223	5186223	5139998	5123674	4957420	4545071	74	396432	5186223	50.37	195795	105935	9	18	0		74	5186223	50.37	5090		4848	99.91	1.12	TRUE
562.23529	117	117	60	50	34	22	4844304	4844304	4724381	4649768	4373628	3939889	117	395534	4844304	50.75	186429	86604	9	18	0		117	4844304	50.75	4826		4594	99.96	0.39	TRUE
562.2353	106	106	67	60	50	35	5416337	5416337	5330957	5289037	5136663	4598573	106	451305	5416337	50.63	134250	72101	13	27	0		106	5416337	50.63	5385		5055	99.96	0.14	TRUE
562.23531	66	66	51	45	38	27	4770463	4770463	4741395	4699082	4570434	4187713	66	405597	4770463	50.64	183354	92134	10	19	0		66	4770463	50.64	4657		4434	99.96	0.08	TRUE
562.23532	117	117	64	55	39	27	5298231	5298231	5184777	5122090	4856413	4414650	117	317971	5298231	50.71	178573	106281	12	22	0		117	5298231	50.71	5380		5090	99.96	0.58	TRUE
562.23533	101	101	65	51	34	22	5138096	5138096	5055890	4952669	4682240	4287159	101	525736	5138096	50.44	185580	113067	9	18	0		101	5138096	50.44	5105		4807	99.96	0.08	TRUE
562.23534	94	94	55	42	30	19	5034522	5034522	4943968	4850252	4670457	4307914	94	563744	5034522	50.48	254477	117478	7	14	0		94	5034522	50.48	4987		4705	99.96	0.08	TRUE
562.23535	102	102	67	57	46	29	5117573	5117573	5037363	4968158	4796703	4206504	102	450529	5117573	50.59	147243	71277	11	24	0		102	5117573	50.59	5021		4741	99.96	0.31	TRUE
562.23536	113	113	72	65	49	33	5135548	5135548	5049410	4993476	4729947	4150802	113	205833	5135548	50.61	123303	72995	16	29	0		113	5135548	50.61	5077		4807	99.96	0.08	TRUE
562.23537	93	93	47	35	28	22	4991792	4991792	4903279	4811425	4703755	4492466	93	538244	4991792	50.54	198572	129027	8	15	0		93	4991792	50.54	4942		4705	99.96	0.08	TRUE
562.23538	116	116	66	56	46	32	5005032	5005032	4883977	4816809	4646339	4151381	116	319219	5005032	50.62	136219	71028	13	26	0		116	5005032	50.62	4906		4679	99.96	0.13	TRUE
562.23539	98	98	69	56	39	32	5080972	5080972	5012629	4924110	4650312	4381459	98	390152	5080972	50.75	158966	83656	13	24	0		98	5080972	50.75	5079		4815	99.96	0.08	TRUE
562.2354	69	69	51	40	32	21	5124092	5124092	5083910	5008772	4880118	4506303	69	526613	5124092	50.53	228573	130632	8	15	0		69	5124092	50.53	5100		4835	99.96	0.08	TRUE
562.23541	172	172	112	96	59	33	5278611	5278611	5135320	5022177	4406617	3456937	172	295449	5278611	50.47	77208	36338	21	45	0		172	5278611	50.47	5437		5154	99.96	0.39	TRUE
562.23542	114	114	68	57	40	28	5144096	5144096	5042917	4969324	4691732	4231396	114	361438	5144096	50.75	173037	76054	11	23	0		114	5144096	50.75	5145		4874	99.96	0.11	TRUE
562.23543	169	169	90	73	48	29	5240286	5240286	5051885	4933273	4522333	3842062	169	287693	5240286	50.46	128287	48354	14	31	0		169	5240286	50.46	5263		4969	99.96	0.08	TRUE
562.23544	146	146	78	63	42	28	5323307	5323307	5170555	5068839	4721087	4219815	146	363320	5323307	50.52	142500	72742	12	25	0		146	5323307	50.52	5362		5051	99.96	0.08	TRUE
562.23545	126	126	69	56	36	23	5238066	5238066	5107160	5021547	4735445	4299705	126	513858	5238066	50.48	203109	101672	9	18	0		126	5238066	50.48	5232		4940	99.96	0.08	TRUE
562.23546	102	102	63	49	36	27	5017908	5017908	4929363	4834349	4629341	4326761	102	402107	5017908	50.52	186498	98725	9	19	0		102	5017908	50.52	4958		4679	99.96	0.08	TRUE
562.23547	107	107	63	51	40	30	5062490	5062490	4968690	4889565	4703807	4366352	107	300179	5062490	50.54	149130	106876	13	23	0		107	5062490	50.54	5066		4809	99.96	0.08	TRUE
562.23548	130	130	77	60	37	25	5131306	5131306	5012828	4885424	4518309	4111776	130	376306	5131306	50.47	186498	74928	10	21	0		130	5131306	50.47	5109		4811	99.96	0.08	TRUE
562.23549	82	82	50	45	34	25	4923371	4923371	4857197	4817216	4631146	4285682	82	493424	4923371	50.5	196399	102685	8	17	0		82	4923371	50.5	4844		4589	99.96	0.08	TRUE
562.2355	160	160	86	72	49	36	5283493	5283493	5113862	5012700	4630547	4168538	160	351394	5283493	50.61	108834	53492	15	33	0		160	5283493	50.61	5300		5023	99.96	0.08	TRUE
562.23551	99	99	59	50	33	27	5132933	5132933	5043989	4984564	4695870	4456598	99	424858	5132933	50.79	178688	109366	11	20	0		99	5132933	50.79	5161		4881	99.96	0.08	TRUE
562.23552	90	90	55	50	38	28	5104411	5104411	5024489	4988228	4801838	4460474	90	539726	5104411	50.61	189334	84489	8	18	0		90	5104411	50.61	5103		4859	99.96	0.08	TRUE
562.23553	99	99	58	53	46	32	5138851	5138851	5045930	5013551	4884627	4401903	99	450528	5138851	50.58	136722	74970	11	24	0		99	5138851	50.58	5078		4810	99.96	0.08	TRUE
562.23554	91	91	55	47	36	24	5031860	5031860	4951115	4892493	4701515	4261359	91	508774	5031860	50.62	197044	86696	9	18	0		91	5031860	50.62	5024		4739	99.88	0.08	TRUE
562.23555	195	195	129	103	67	36	5051388	5051388	4899643	4710955	4124801	3073048	195	150025	5051388	50.68	59938	30287	26	55	0		195	5051388	50.68	5139		4838	100	0.58	TRUE
562.23556	96	96	59	47	34	20	5038967	5038967	4955700	4870413	4670486	4172909	96	525736	5038967	50.49	202469	113067	8	16	0		96	5038967	50.49	4987		4704	99.96	0.08	TRUE
562.23557	43	43	33	31	28	19	4868968	4868968	4844402	4828250	4787731	4474055	43	641572	4868968	50.51	252654	178584	6	12	0		43	4868968	50.51	4774		4529	99.96	0.39	TRUE
562.23558	113	113	67	57	40	28	5280987	5280987	5181173	5113227	4827595	4378815	113	330395	5280987	50.7	173531	87086	12	23	0		113	5280987	50.7	5360		5079	99.96	0.64	TRUE
562.23559	187	187	113	96	62	30	5291036	5291036	5112617	4994747	4449918	3262027	187	261616	5291036	50.48	74415	34808	21	47	0		187	5291036	50.48	5462		5145	99.96	0.44	TRUE
562.2356	92	92	59	46	34	24	5043900	5043900	4957914	4864735	4684885	4355955	92	425913	5043900	50.49	186697	105027	9	18	0.04		92	5043900	50.49	4981		4701	99.96	0.08	TRUE
562.23561	95	95	58	50	34	24	5015024	5015024	4922697	4860315	4606116	4263280	95	526288	5015024	50.37	185486	109702	9	18	0		95	5015024	50.37	4941		4673	99.96	0.08	TRUE
562.23562	93	93	58	51	44	29	5130601	5130601	5053527	5007263	4870544	4323432	93	451316	5130601	50.5	157480	72089	11	22	0		93	5130601	50.5	5045		4772	99.96	0.08	TRUE
562.23563	77	77	55	43	34	23	4907269	4907269	4853598	4770693	4628858	4252044	77	504738	4907269	50.5	186497	105026	8	17	0		77	4907269	50.5	4818		4549	99.96	0.08	TRUE
562.23564	75	75	47	42	35	25	5067981	5067981	4998514	4965485	4843103	4528218	75	450286	5067981	50.57	185979	114668	9	17	0		75	5067981	50.57	5162		4884	99.96	0.62	TRUE
562.23565	112	112	65	55	37	27	5087387	5087387	4975779	4903240	4594867	4265864	112	419582	5087387	50.57	158682	103022	12	22	0		112	5087387	50.57	5097		4814	99.96	0.62	TRUE
562.23566	130	130	66	54	37	26	5318520	5318520	5176775	5092196	4797005	4407028	130	424699	5318520	50.71	170471	106034	11	21	0		130	5318520	50.71	5384		5094	99.96	0.31	TRUE
562.23567	108	108	65	54	38	27	5088750	5088750	4987644	4906242	4633572	4266544	108	419582	5088750	50.57	158682	103022	12	22	0		108	5088750	50.57	5100		4814	99.96	0.62	TRUE
562.23568	119	119	82	74	49	29	4821970	4821970	4741087	4682786	4224821	3493368	119	271579	4821970	50.54	97642	46581	16	32	0		119	4821970	50.54	4773		4555	99.81	0.62	TRUE
562.23569	85	85	53	47	37	28	5086670	5086670	5015367	4975589	4802364	4501251	85	555144	5086670	50.46	194079	98872	9	18	0		85	5086670	50.46	5018		4778	99.96	0.08	TRUE
562.2357	82	82	50	42	32	24	4915394	4915394	4850594	4794834	4650166	4360676	82	470780	4915394	50.53	186498	113622	8	16	0		82	4915394	50.53	4844		4589	99.96	0.08	TRUE
562.23571	103	103	62	54	36	29	5157127	5157127	5062432	5009524	4706801	4448662	103	424832	5157127	50.7	165068	106034	11	21	0.02		103	5157127	50.7	5201		4927	99.65	0.12	TRUE
562.23572	84	84	61	50	37	29	5175063	5175063	5120895	5042817	4818264	4528353	84	319455	5175063	50.6	172908	109341	12	22	0		84	5175063	50.6	5161		4904	99.96	0.08	TRUE
562.23573	116	116	78	65	54	36	5211957	5211957	5115378	5020443	4854528	4223013	116	292381	5211957	50.62	102865	63214	15	31	0		116	5211957	50.62	5149		4889	99.96	0.67	TRUE
562.23574	111	111	61	50	35	26	5158012	5158012	5047140	4973275	4718852	4381686	111	346263	5158012	50.7	173801	106034	11	20	0		111	5158012	50.7	5180		4915	99.96	0.08	TRUE
562.23575	114	114	75	64	39	29	5143437	5143437	5060692	4980514	4565165	4219052	114	353459	5143437	50.42	160029	73883	11	24	0		114	5143437	50.42	5166		4871	99.65	0.12	TRUE
562.23576	74	74	48	41	36	27	4975653	4975653	4914354	4870442	4796420	4481799	74	427161	4975653	50.56	167459	103797	9	18	0		74	4975653	50.56	4913		4677	100	0.08	TRUE
562.23577	119	119	62	51	40	28	5124568	5124568	5005857	4932029	4764250	4345114	119	430102	5124568	50.22	138859	102519	11	21	0		119	5124568	50.22	5108		4829	99.96	0.08	TRUE
562.23578	81	81	50	41	31	22	4882528	4882528	4812445	4745491	4585018	4274982	81	519642	4882528	50.55	186695	115087	9	16	0		81	4882528	50.55	4754		4504	99.96	0.08	TRUE
562.23579	60	60	43	36	29	19	5036940	5036940	4984242	4934016	4812804	4433599	60	543001	5036940	50.5	351118	119722	6	13	0		60	5036940	50.5	5039		4818	99.96	0.08	TRUE
562.2358	141	141	81	66	50	28	5279411	5279411	5147130	5028554	4759458	4000335	141	343566	5279411	50.44	130210	52033	12	28	0		141	5279411	50.44	5322		5032	99.96	0.08	TRUE
562.23581	53	53	42	39	35	27	5139346	5139346	5115131	5092946	5012328	4733301	53	494355	5139346	50.32	207044	114329	8	16	0		53	5139346	50.32	5025		4792	99.65	0.12	TRUE
562.23582	147	147	92	72	54	34	5198157	5198157	5072266	4934426	4625928	3956753	147	301222	5198157	50.57	92597	51635	16	33	0		147	5198157	50.57	5209		4925	99.96	0.13	TRUE
562.23583	185	185	120	95	56	29	4973483	4973483	4828113	4643382	3992064	2943313	185	209055	4973483	51.01	68275	34412	22	48	0		185	4973483	51.01	5003		4807	99.96	0.43	TRUE
562.23584	106	106	63	51	35	23	5118204	5118204	5013885	4915987	4661886	4260547	106	503012	5118204	50.44	182622	109836	10	19	0		106	5118204	50.44	5084		4791	99.96	0.08	TRUE
562.23585	106	106	63	50	35	24	5147867	5147867	5045289	4947265	4729475	4351065	106	524600	5147867	50.5	185868	110771	9	18	0		106	5147867	50.5	5126		4845	99.96	0.08	TRUE
562.23586	103	103	63	53	38	27	5025152	5025152	4940106	4873553	4622888	4234902	103	379026	5025152	50.37	160986	98141	10	21	0		103	5025152	50.37	4999		4702	99.96	0.17	TRUE
562.23587	129	129	64	48	37	24	5236130	5236130	5086434	4977359	4803677	4336740	129	499618	5236130	50.51	177979	101243	10	19	0		129	5236130	50.51	5335		5064	99.96	1.01	TRUE
562.23588	88	88	56	48	37	24	5030597	5030597	4964443	4908462	4758437	4324708	88	518670	5030597	50.52	189828	110544	9	18	0.02		88	5030597	50.52	4971		4722	99.96	0.08	TRUE
562.23589	98	98	56	49	39	29	4973770	4973770	4877531	4828556	4662356	4292612	98	457878	4973770	50.67	174941	72222	9	20	0		98	4973770	50.67	4986		4753	99.96	0.61	TRUE
562.2359	107	107	70	62	48	29	5136859	5136859	5047220	4988413	4779703	4082593	107	329446	5136859	50.46	172261	60304	12	25	0		107	5136859	50.46	5199		4924	99.96	0.31	TRUE
562.23591	122	122	85	76	52	29	4833868	4833868	4742144	4676039	4224661	3368886	122	304366	4833868	50.77	95840	42815	16	35	0		122	4833868	50.77	4741		4503	99.86	0.12	TRUE
562.23592	92	92	74	65	46	29	4629092	4629092	4593772	4533605	4223143	3636907	92	311292	4629092	50.83	117574	55555	13	27	0		92	4629092	50.83	4558		4351	99.96	0.08	TRUE
562.23593	82	82	53	45	32	25	5141152	5141152	5077088	5022522	4815646	4546471	82	474897	5141152	50.71	186349	109252	10	18	0		82	5141152	50.71	5137		4881	99.96	0.58	TRUE
562.23594	129	129	76	64	50	32	5306426	5306426	5193666	5113279	4900918	4228187	129	331315	5306426	50.36	133969	56169	13	28	0		129	5306426	50.36	5347		5044	99.96	0.41	TRUE
562.23595	189	189	112	93	68	40	5320336	5320336	5139686	5004160	4581580	3585935	189	265574	5320336	50.56	63412	39056	24	50	0		189	5320336	50.56	5388		5101	99.96	0.36	TRUE
562.23596	81	81	53	46	32	24	4908526	4908526	4848346	4797561	4560259	4274214	81	493422	4908526	50.47	196398	101844	8	17	0		81	4908526	50.47	4824		4562	99.96	0.12	TRUE
562.23597	86	86	49	40	31	22	5057794	5057794	4977715	4918548	4791630	4448083	86	443795	5057794	50.5	215877	148536	8	15	0		86	5057794	50.5	5024		4768	99.96	0.08	TRUE
562.23598	127	127	72	56	40	26	5082142	5082142	4969558	4853321	4593187	4131373	127	402126	5082142	50.49	186697	74634	10	22	0		127	5082142	50.49	5043		4760	99.96	0.08	TRUE
562.23599	122	122	76	63	41	26	5138526	5138526	5030684	4932109	4583457	4046655	122	305587	5138526	50.42	168513	84589	12	23	0		122	5138526	50.42	5096		4813	99.96	0.08	TRUE
562.236	132	132	86	67	50	33	5239815	5239815	5129589	5006108	4714371	4126172	132	395997	5239815	50.61	111160	56528	14	30	0		132	5239815	50.61	5274		4976	99.96	0.13	TRUE
562.23601	193	193	111	89	63	33	5357722	5357722	5159443	5001624	4550247	3464494	193	335354	5357722	50.54	77711	38289	20	46	0		193	5357722	50.54	5462		5167	99.96	0.36	TRUE
562.23602	91	91	57	47	36	26	5010585	5010585	4927770	4853715	4687700	4370367	91	359810	5010585	50.47	182622	105116	10	19	0		91	5010585	50.47	4961		4675	99.96	0.08	TRUE
562.23603	155	155	80	64	49	33	5170788	5170788	5002256	4891711	4655399	4084462	155	332582	5170788	50.54	130523	57946	15	30	0		155	5170788	50.54	5232		4938	99.78	0.08	TRUE
562.23604	118	118	61	50	37	26	5153650	5153650	5024888	4943993	4746754	4364033	118	387045	5153650	50.32	185358	101648	9	19	0		118	5153650	50.32	5157		4859	99.96	0.08	TRUE
562.23605	67	67	49	41	36	23	5170210	5170210	5128892	5070432	4993717	4539055	67	535333	5170210	50.55	189395	133927	8	16	0.02		67	5170210	50.55	5174		4892	99.96	0.93	TRUE
562.23606	78	78	55	50	41	25	4741814	4741814	4685497	4649799	4499274	3886613	78	468188	4741814	50.58	149498	74687	9	20	0		78	4741814	50.58	4660		4465	99.96	0.08	TRUE
562.23607	176	176	100	83	56	34	5088625	5088625	4918952	4810808	4419422	3647676	176	225424	5088625	50.7	97763	41365	18	38	0		176	5088625	50.7	5194		4874	99.96	0.08	TRUE
562.23608	143	143	78	62	48	31	5396447	5396447	5254198	5133754	4900927	4310864	143	317809	5396447	50.45	155026	58085	13	27	0		143	5396447	50.45	5499		5200	99.88	0.39	TRUE
562.23609	111	111	64	50	34	22	5129173	5129173	5023548	4917586	4676113	4281032	111	525650	5129173	50.45	186498	113067	9	18	0		111	5129173	50.45	5088		4806	99.96	0.08	TRUE
562.2361	82	82	59	52	38	29	5163766	5163766	5109175	5054986	4801374	4472590	82	330203	5163766	50.7	166692	106034	12	22	0		82	5163766	50.7	5179		4913	99.96	0.46	TRUE
562.23611	178	178	123	94	67	32	5090567	5090567	4953505	4751701	4311676	3017991	178	226183	5090567	50.58	62479	36079	24	51	0		178	5090567	50.58	5157		4892	99.34	0.67	TRUE
562.23612	149	149	86	68	48	33	5292159	5292159	5145072	5019650	4688163	4166823	149	344835	5292159	50.73	120652	55869	15	30	0		149	5292159	50.73	5301		5038	99.96	0.44	TRUE
562.23613	54	54	36	32	29	20	4912971	4912971	4867761	4836920	4788055	4431586	54	509671	4912971	50.74	276000	127458	7	13	0		54	4912971	50.74	4849		4618	99.96	0.39	TRUE
562.23614	54	54	39	34	32	25	4692685	4692685	4664577	4634379	4602670	4358011	54	333950	4692685	50.77	231210	127294	9	16	0		54	4692685	50.77	4558		4362	99.96	0.14	TRUE
562.23615	110	110	63	50	33	27	5118968	5118968	5015484	4919528	4633878	4417846	110	308610	5118968	50.78	166801	109366	12	21	0		110	5118968	50.78	5104		4845	99.96	0.11	TRUE
562.23616	135	135	78	63	44	28	5224006	5224006	5076190	4959488	4632673	4059982	135	443122	5224006	50.52	141037	57179	13	26	0		135	5224006	50.52	5188		4894	99.96	0.13	TRUE
562.23617	86	86	61	50	34	26	5027973	5027973	4970221	4891980	4626634	4334249	86	433573	5027973	50.79	173799	109366	10	20	0		86	5027973	50.79	5007		4750	99.65	0.08	TRUE
562.23618	123	123	84	68	51	29	5187182	5187182	5093446	4976883	4692347	3929629	123	309236	5187182	50.67	135441	54353	13	29	0		123	5187182	50.67	5194		4917	99.96	0.13	TRUE
562.23619	99	99	64	53	41	28	5082680	5082680	5001180	4922554	4750971	4323251	99	472600	5082680	50.44	165766	101672	12	21	0		99	5082680	50.44	5052		4792	99.96	0.08	TRUE
562.2362	82	82	50	46	35	25	4987228	4987228	4916320	4891728	4703618	4339845	82	486915	4987228	50.54	185244	113115	8	17	0		82	4987228	50.54	5019		4767	99.65	0.66	TRUE
562.23621	123	123	78	60	46	27	5200312	5200312	5087317	4964745	4728382	4081108	123	433076	5200312	50.71	164372	61240	11	25	0		123	5200312	50.71	5190		4934	99.96	0.13	TRUE
562.23622	110	110	62	53	43	29	5198602	5198602	5098181	5031336	4863875	4363887	110	430125	5198602	50.31	152296	86691	10	21	0		110	5198602	50.31	5243		4924	99.96	0.08	TRUE
562.23623	100	100	66	53	38	26	5105211	5105211	5021774	4930890	4675562	4254179	100	433305	5105211	50.75	165176	87086	11	21	0.02		100	5105211	50.75	5096		4819	99.96	0.08	TRUE
562.23624	90	90	56	50	37	26	4910510	4910510	4841722	4794731	4578520	4185908	90	328533	4910510	50.74	174903	111338	11	19	0		90	4910510	50.74	4808		4591	99.88	0.39	TRUE
562.23625	92	92	54	41	35	26	5028174	5028174	4938063	4845011	4736708	4430782	92	497088	5028174	50.44	173023	105896	10	19	0		92	5028174	50.44	4953		4700	99.96	0.08	TRUE
562.23626	94	94	60	54	45	31	5034883	5034883	4953953	4910743	4784701	4322630	94	348770	5034883	50.67	158267	88421	12	23	0		94	5034883	50.67	4951		4721	99.96	0.13	TRUE
562.23627	100	100	61	50	34	22	5157608	5157608	5066561	4986763	4735562	4322292	100	537736	5157608	50.42	201013	110520	9	17	0		100	5157608	50.42	5166		4887	99.96	0.08	TRUE
562.23628	105	105	64	50	38	27	5022225	5022225	4926902	4827271	4644327	4258592	105	402015	5022225	50.51	170907	98725	10	20	0		105	5022225	50.51	4960		4690	99.96	0.08	TRUE
562.23629	121	121	69	60	39	23	5219047	5219047	5088660	5027303	4719542	4167825	121	481757	5219047	50.44	180607	91896	10	20	0		121	5219047	50.44	5281		4985	99.96	0.08	TRUE
562.2363	93	93	55	51	39	28	4922964	4922964	4846377	4821032	4639893	4243197	93	366476	4922964	50.71	176333	92699	10	20	0		93	4922964	50.71	4879		4608	99.65	0.62	TRUE
562.23631	123	123	69	58	43	34	5064229	5064229	4934091	4857919	4626080	4315315	123	279648	5064229	50.5	142036	71460	13	26	0		123	5064229	50.5	5113		4841	99.96	0.08	TRUE
562.23632	79	79	48	40	32	22	5103843	5103843	5027632	4978157	4856918	4507185	79	527682	5103843	50.51	225255	121606	8	15	0		79	5103843	50.51	5089		4809	99.96	0.13	TRUE
562.23633	107	107	66	57	37	27	5198629	5198629	5104701	5040162	4694267	4336082	107	433286	5198629	50.67	178687	97397	11	21	0		107	5198629	50.67	5259		4964	99.96	0.08	TRUE
562.23634	123	123	69	49	35	26	5134985	5134985	5026208	4890093	4681935	4360232	123	372613	5134985	50.49	171616	123671	11	20	0		123	5134985	50.49	5165		4882	99.86	0.13	TRUE
562.23635	146	146	66	54	37	26	5099790	5099790	4924145	4844219	4591711	4216784	146	417068	5099790	50.47	174272	91294	11	22	0		146	5099790	50.47	5166		4889	99.96	0.08	TRUE
562.23636	110	110	74	62	49	33	4895926	4895926	4818454	4736394	4511801	3915608	110	270393	4895926	50.73	116584	59740	15	29	0		110	4895926	50.73	4873		4601	99.96	0.08	TRUE
562.23637	104	104	57	44	31	21	5042867	5042867	4940147	4843581	4631691	4301011	104	525166	5042867	50.4	214003	113091	8	16	0		104	5042867	50.4	4969		4694	99.96	0.08	TRUE
562.23638	85	85	47	38	28	21	5037790	5037790	4960904	4891690	4740433	4498617	85	526323	5037790	50.55	268937	129027	7	14	0		85	5037790	50.55	4969		4728	99.96	0.08	TRUE
562.23639	158	158	90	69	53	30	5335260	5335260	5168090	5026180	4772688	3926853	158	350206	5335260	50.56	128366	48378	14	32	0		158	5335260	50.56	5390		5093	99.96	0.13	TRUE
562.2364	88	88	65	57	46	29	4739487	4739487	4680407	4614457	4428839	3770493	88	304408	4739487	50.61	127878	63600	13	26	0		88	4739487	50.61	4728		4504	99.96	0.08	TRUE
562.23641	219	219	134	102	63	29	5170418	5170418	4964760	4742996	4057910	2828686	219	191632	5170418	50.6	51895	31791	25	57	0		219	5170418	50.6	5312		5034	99.55	0.31	TRUE
562.23642	101	101	60	45	32	24	5060748	5060748	4966330	4858368	4654681	4372474	101	433341	5060748	50.81	181764	123928	11	19	0		101	5060748	50.81	5052		4801	99.96	0.08	TRUE
562.23643	94	94	53	43	33	25	5103935	5103935	5021179	4954191	4813706	4538276	94	540923	5103935	50.43	202447	103460	8	17	0		94	5103935	50.43	5044		4798	99.96	0.08	TRUE
562.23644	63	63	43	38	33	27	5017353	5017353	4966622	4928830	4836158	4598559	63	422179	5017353	50.53	190918	109372	9	18	0		63	5017353	50.53	4989		4742	99.96	0.08	TRUE
562.23645	106	106	59	51	41	26	5063933	5063933	4955871	4897978	4708933	4184135	106	451318	5063933	50.63	167057	76799	10	21	0		106	5063933	50.63	4976		4709	99.96	0.31	TRUE
562.23646	120	120	67	54	38	28	5138138	5138138	5018998	4922155	4645171	4294089	120	325574	5138138	50.78	178679	96478	12	23	0		120	5138138	50.78	5150		4879	99.96	0.11	TRUE
562.23647	92	92	63	51	37	23	4929186	4929186	4855049	4774954	4561542	4073978	92	435552	4929186	50.64	173281	86753	9	18	0		92	4929186	50.64	4912		4647	99.96	0.08	TRUE
562.23648	93	93	60	52	45	33	5001757	5001757	4926410	4870967	4751251	4340891	93	348080	5001757	50.55	146580	85543	13	24	0.02		93	5001757	50.55	4895		4671	99.96	0.13	TRUE
562.23649	194	194	134	111	65	27	4996635	4996635	4852050	4690886	3918741	2494380	194	179193	4996635	50.62	48551	29925	28	59	0		194	4996635	50.62	5036		4792	99.34	0.62	TRUE
562.2365	75	75	57	45	37	29	5099808	5099808	5052512	4962235	4843172	4569753	75	441154	5099808	50.55	184260	117093	11	20	0		75	5099808	50.55	5003		4761	99.96	0.08	TRUE
562.23651	95	95	60	52	41	26	5168128	5168128	5092463	5037535	4832760	4277539	95	370932	5168128	50.49	174945	89190	10	20	0		95	5168128	50.49	5178		4883	99.65	0.08	TRUE
562.23652	209	209	135	103	66	33	5183796	5183796	4989686	4764912	4127069	2968862	209	215964	5183796	50.67	56180	31791	26	58	0		209	5183796	50.67	5285		4995	99.55	0.62	TRUE
562.23653	157	157	74	60	44	32	5273749	5273749	5085243	4989357	4707375	4268675	157	424808	5273749	50.62	145795	65502	14	27	0		157	5273749	50.62	5374		5080	99.96	0.08	TRUE
562.23654	120	120	79	62	43	30	5230465	5230465	5131224	5013580	4716091	4234067	120	370081	5230465	50.63	162945	56910	12	25	0		120	5230465	50.63	5280		4977	99.96	0.31	TRUE
562.23655	60	60	44	41	32	25	4931794	4931794	4898376	4881810	4749440	4500579	60	537030	4931794	50.58	213931	104980	7	16	0		60	4931794	50.58	4807		4581	99.5	0.08	TRUE
562.23656	73	73	52	43	33	23	4880787	4880787	4837785	4768737	4612764	4281755	73	362090	4880787	50.54	194530	130658	9	17	0		73	4880787	50.54	4791		4554	99.96	0.08	TRUE
562.23657	126	126	80	67	46	32	5121866	5121866	5019668	4936416	4592051	4110702	126	393531	5121866	50.45	116589	65654	13	28	0		126	5121866	50.45	5185		4906	99.96	0.23	TRUE
562.23658	93	93	61	52	43	27	4955352	4955352	4886109	4817534	4675674	4122114	93	510745	4955352	50.52	153579	76413	9	21	0		93	4955352	50.52	4821		4580	99.96	0.31	TRUE
562.23659	103	103	61	48	34	26	5088340	5088340	5008889	4922670	4685041	4384231	103	424888	5088340	50.81	173799	111052	11	20	0		103	5088340	50.81	5082		4828	99.34	0.08	TRUE
562.2366	81	81	45	36	31	23	5059842	5059842	4988999	4934146	4840536	4559997	81	383669	5059842	50.51	203107	130645	9	16	0		81	5059842	50.51	5023		4776	99.86	0.08	TRUE
562.23661	72	72	44	38	32	25	4997902	4997902	4930153	4884501	4780016	4538933	72	550469	4997902	50.4	197987	113285	8	16	0		72	4997902	50.4	4909		4661	99.96	0.08	TRUE
562.23662	133	133	69	53	40	29	5206704	5206704	5070822	4969301	4777320	4374155	133	386002	5206704	50.33	161173	95701	12	23	0		133	5206704	50.33	5245		4932	99.96	0.08	TRUE
562.23663	141	141	100	84	60	32	4913626	4913626	4820493	4709782	4236247	3246556	141	277690	4913626	50.72	75074	36989	21	43	0		141	4913626	50.72	4911		4667	99.81	0.08	TRUE
562.23664	106	106	59	51	36	28	5089407	5089407	4981940	4926609	4667576	4380070	106	325484	5089407	50.8	166923	106261	12	21	0		106	5089407	50.8	5064		4798	99.96	0.11	TRUE
562.23665	56	56	37	33	31	20	4975807	4975807	4933962	4909396	4888357	4527272	56	935257	4975807	50.41	245821	134626	5	12	0.02		56	4975807	50.41	4964		4713	99.96	0.08	TRUE
562.23666	123	123	69	54	39	27	5175338	5175338	5056995	4944839	4721074	4324540	123	462289	5175338	50.44	174136	94850	11	21	0		123	5175338	50.44	5167		4872	99.96	0.08	TRUE
562.23667	76	76	45	41	33	24	5047214	5047214	4981074	4952091	4813310	4515623	76	539765	5047214	50.6	206255	110487	7	15	0		76	5047214	50.6	5017		4763	99.73	0.08	TRUE
562.23668	75	75	58	52	44	30	5021341	5021341	4981611	4943501	4812921	4337361	75	344552	5021341	50.66	152077	82937	11	22	0		75	5021341	50.66	4947		4730	99.65	0.08	TRUE
562.23669	116	116	59	50	37	28	5158180	5158180	5044170	4983637	4804183	4490482	116	430105	5158180	50.31	196711	95838	9	19	0		116	5158180	50.31	5146		4839	99.96	0.08	TRUE
562.2367	88	88	52	42	38	30	4962749	4962749	4877715	4805352	4746056	4450216	88	472912	4962749	50.57	181439	90334	9	20	0		88	4962749	50.57	4943		4710	99.96	0.08	TRUE
562.23671	117	117	75	61	46	30	5257856	5257856	5161203	5058008	4809230	4226925	117	373960	5257856	50.6	135235	60576	11	25	0		117	5257856	50.6	5309		5018	99.96	0.31	TRUE
562.23672	134	134	75	55	41	26	5171432	5171432	5038923	4889093	4670875	4157895	134	432719	5171432	50.6	152625	87915	11	22	0		134	5171432	50.6	5223		4932	99.88	0.08	TRUE
562.23673	105	105	65	55	39	30	5098765	5098765	5012021	4941802	4664491	4339748	105	344619	5098765	50.73	180700	67534	10	22	0		105	5098765	50.73	5101		4830	99.96	0.89	TRUE
562.23674	98	98	57	48	38	27	5136850	5136850	5022696	4961912	4814281	4446725	98	406230	5136850	50.4	203107	103029	10	19	0		98	5136850	50.4	5125		4822	99.96	0.08	TRUE
562.23675	204	204	108	86	60	31	5111510	5111510	4892498	4742518	4351587	3296835	204	286095	5111510	50.79	85137	39370	20	44	0		204	5111510	50.79	5231		4959	99.96	0.08	TRUE
562.23676	98	98	45	40	33	26	5070891	5070891	4953315	4920049	4801948	4574245	98	486912	5070891	50.63	186375	111967	8	17	0.02		98	5070891	50.63	5144		4870	99.96	0.62	TRUE
562.23677	133	133	72	62	38	24	5125442	5125442	4968487	4903884	4500311	3978939	133	526564	5125442	50.42	145351	72852	11	22	0		133	5125442	50.42	5088		4810	99.96	0.08	TRUE
562.23678	106	106	61	51	34	25	5066513	5066513	4961974	4893250	4611418	4272258	106	505091	5066513	50.44	186498	94874	9	19	0		106	5066513	50.44	5009		4738	99.96	0.13	TRUE
562.23679	104	104	61	48	34	25	5026636	5026636	4931327	4842409	4652422	4348980	104	525379	5026636	50.47	182538	105026	9	18	0		104	5026636	50.47	4958		4697	99.96	0.08	TRUE
562.2368	111	111	71	53	37	29	5290592	5290592	5201453	5062691	4821792	4567568	111	449478	5290592	50.45	169140	104992	11	21	0		111	5290592	50.45	5332		5021	99.96	0.13	TRUE
562.23681	87	87	58	48	40	32	5011914	5011914	4938858	4860793	4718228	4410641	87	390344	5011914	50.65	158999	90961	12	22	0		87	5011914	50.65	4911		4656	99.96	0.39	TRUE
562.23682	158	158	95	78	60	29	5055375	5055375	4924793	4810117	4524914	3309153	158	438874	5055375	50.58	82299	42241	18	40	0		158	5055375	50.58	5092		4782	99.96	0.63	TRUE
562.23683	118	118	70	57	37	25	5102960	5102960	4991108	4905779	4602462	4170404	118	537128	5102960	50.45	173971	89238	10	20	0		118	5102960	50.45	5075		4798	99.96	0.08	TRUE
562.23684	115	115	76	67	51	34	5097005	5097005	5012419	4943954	4696662	4082388	115	342933	5097005	50.56	128396	53074	14	30	0		115	5097005	50.56	5069		4797	99.81	0.62	TRUE
562.23685	70	70	46	43	38	26	4793959	4793959	4736882	4714831	4627584	4193538	70	504232	4793959	50.6	186484	88306	9	18	0		70	4793959	50.6	4734		4494	99.96	0.08	TRUE
562.23686	62	62	46	42	37	27	5055471	5055471	5017803	4992579	4917980	4575448	62	527480	5055471	50.35	244793	110484	9	16	0		62	5055471	50.35	5037		4785	99.96	0.08	TRUE
562.23687	109	109	58	46	34	24	5147438	5147438	5034483	4941895	4766689	4447248	109	363967	5147438	50.39	202447	113115	9	18	0		109	5147438	50.39	5169		4872	99.96	0.08	TRUE
562.23688	111	111	61	48	36	26	5032612	5032612	4921524	4832965	4652457	4321700	111	359076	5032612	50.43	182622	105025	10	19	0		111	5032612	50.43	4972		4686	99.96	0.08	TRUE
562.23689	96	96	61	53	37	22	5136484	5136484	5047407	4993915	4718786	4229238	96	556515	5136484	50.54	180607	102715	9	18	0		96	5136484	50.54	5104		4824	99.96	0.08	TRUE
562.2369	85	85	53	43	34	24	4994094	4994094	4921334	4856641	4717357	4332185	85	358922	4994094	50.6	189587	124760	10	18	0		85	4994094	50.6	5013		4734	99.96	0.93	TRUE
562.23691	111	111	67	50	35	24	5117816	5117816	5006557	4889051	4652670	4294002	111	460065	5117816	50.49	203864	110170	9	18	0		111	5117816	50.49	5165		4859	99.96	0.62	TRUE
562.23692	115	115	69	54	43	29	5140753	5140753	5017634	4903112	4742788	4219371	115	331428	5140753	50.54	164469	71716	11	23	0		115	5140753	50.54	5203		4913	99.96	0.62	TRUE
562.23693	61	61	40	36	28	22	4926825	4926825	4872203	4845627	4717517	4508018	61	623838	4926825	50.53	214005	132450	7	14	0		61	4926825	50.53	4815		4567	99.96	0.08	TRUE
562.23694	180	180	110	95	58	27	5165016	5165016	4985967	4880233	4276091	3082930	180	251455	5165016	50.45	76182	36314	20	45	0		180	5165016	50.45	5212		4967	99.96	0.08	TRUE
562.23695	184	184	105	89	60	34	5200062	5200062	5018604	4909581	4433359	3455489	184	228455	5200062	50.53	84428	40941	22	44	0		184	5200062	50.53	5257		4979	99.96	0.08	TRUE
562.23696	87	87	52	44	31	23	5078698	5078698	4997001	4937205	4731615	4434573	87	431173	5078698	50.56	202447	113097	8	17	0		87	5078698	50.56	5025		4766	99.96	0.08	TRUE
562.23697	90	90	54	49	38	22	4995417	4995417	4918556	4885819	4710823	4137910	90	512543	4995417	50.64	188335	86457	8	17	0		90	4995417	50.64	4966		4707	99.96	0.23	TRUE
562.23698	114	114	71	65	51	33	5207660	5207660	5089086	5044846	4816860	4156913	114	312928	5207660	50.44	121068	60305	15	29	0		114	5207660	50.44	5208		4911	99.65	0.08	TRUE
562.23699	107	107	70	55	43	30	5139508	5139508	5052671	4939965	4747446	4303415	107	319225	5139508	50.5	164481	79749	12	23	0		107	5139508	50.5	5070		4807	99.96	0.13	TRUE
562.237	117	117	80	68	48	31	5194844	5194844	5108473	5026179	4676225	4058389	117	394042	5194844	50.63	146580	55930	13	29	0		117	5194844	50.63	5183		4920	99.96	0.13	TRUE
562.23701	86	86	56	48	38	26	5011997	5011997	4946761	4883706	4734922	4323366	86	516745	5011997	50.42	196405	94349	8	19	0		86	5011997	50.42	4929		4652	99.96	0.12	TRUE
562.23702	113	113	66	54	41	26	5066905	5066905	4956365	4868351	4672656	4165001	113	362058	5066905	50.37	179496	71609	11	21	0		113	5066905	50.37	5024		4738	99.96	0.08	TRUE
562.23703	94	94	55	46	34	25	5065149	5065149	4968901	4906937	4722969	4414477	94	504208	5065149	50.5	185716	104981	9	18	0		94	5065149	50.5	5044		4762	99.96	0.31	TRUE
562.23704	89	89	54	45	36	25	5037213	5037213	4972302	4911280	4774969	4371559	89	487982	5037213	50.43	179070	101647	9	18	0		89	5037213	50.43	5009		4706	99.96	0.12	TRUE
562.23705	102	102	63	54	43	30	5077179	5077179	4993320	4926144	4734577	4279442	102	522251	5077179	50.3	138859	72675	11	23	0		102	5077179	50.3	5043		4764	99.96	0.08	TRUE
562.23706	109	109	65	55	44	29	5235284	5235284	5127859	5058228	4865906	4344116	109	366295	5235284	50.72	188324	74858	11	23	0		109	5235284	50.72	5265		4940	99.88	0.08	TRUE
562.23707	50	50	39	33	31	23	4803907	4803907	4777619	4728629	4708066	4415937	50	485411	4803907	50.49	224639	133867	8	15	0		50	4803907	50.49	4686		4450	99.96	0.39	TRUE
562.23708	104	104	47	43	34	25	4987525	4987525	4856319	4828261	4691726	4371447	104	452489	4987525	50.55	185868	105117	9	18	0		104	4987525	50.55	4916		4652	99.96	0.13	TRUE
562.23709	73	73	49	47	40	29	4847192	4847192	4792864	4780008	4642739	4259171	73	428548	4847192	50.63	154580	94042	10	21	0		73	4847192	50.63	4842		4615	99.96	0.08	TRUE
562.2371	99	99	65	53	39	26	5228611	5228611	5159778	5069251	4853339	4385602	99	493424	5228611	50.44	174536	98222	9	20	0		99	5228611	50.44	5258		4942	99.96	0.12	TRUE
562.23711	73	73	46	37	31	23	4908345	4908345	4854726	4793451	4703593	4407222	73	510133	4908345	50.51	186697	132472	8	15	0		73	4908345	50.51	4791		4562	99.96	0.08	TRUE
562.23712	130	130	80	68	45	33	5108372	5108372	5001502	4917434	4535251	4126632	130	280482	5108372	50.72	132634	59518	14	28	0		130	5108372	50.72	5136		4842	99.96	0.39	TRUE
562.23713	70	70	54	47	33	24	5070416	5070416	5025511	4979292	4744083	4402038	70	502104	5070416	50.71	198969	110497	9	17	0		70	5070416	50.71	5040		4785	99.96	0.39	TRUE
562.23714	79	79	46	44	40	27	5115713	5115713	5030849	5016546	4931759	4449053	79	494889	5115713	50.44	174168	102150	10	19	0		79	5115713	50.44	5162		4875	99.96	0.46	TRUE
562.23715	130	130	56	46	36	26	5115268	5115268	4951567	4874172	4739234	4394703	130	539766	5115268	50.65	172549	105577	9	19	0		130	5115268	50.65	5166		4895	99.88	0.39	TRUE
562.23716	109	109	61	48	35	24	5026765	5026765	4922909	4830508	4629022	4260003	109	505452	5026765	50.46	176944	105474	10	19	0		109	5026765	50.46	5003		4725	99.96	0.08	TRUE
562.23717	83	83	59	53	44	27	4933035	4933035	4883054	4842736	4681351	4053357	83	446604	4933035	50.6	149909	81636	10	21	0		83	4933035	50.6	4837		4589	99.96	0.62	TRUE
562.23718	91	91	55	45	31	22	4973163	4973163	4888573	4817343	4609409	4301802	91	521406	4973163	50.5	186695	127308	9	16	0		91	4973163	50.5	4865		4611	99.96	0.08	TRUE
562.23719	164	164	101	79	57	30	4920359	4920359	4776942	4613484	4259846	3299037	164	260695	4920359	50.87	78693	40488	17	40	0		164	4920359	50.87	5004		4764	99.96	0.11	TRUE
562.2372	105	105	58	51	37	23	4876729	4876729	4767066	4718696	4505797	3982439	105	397115	4876729	50.41	179598	85713	9	18	0		105	4876729	50.41	4824		4557	99.86	0.08	TRUE
562.23721	155	155	98	81	54	29	5325294	5325294	5191643	5070999	4619229	3732455	155	379877	5325294	50.53	102459	43691	14	35	0		155	5325294	50.53	5317		5032	99.96	0.08	TRUE
562.23722	104	104	60	48	34	22	5109360	5109360	5010436	4919654	4710268	4304829	104	525736	5109360	50.43	202475	109837	8	17	0		104	5109360	50.43	5065		4777	99.96	0.08	TRUE
562.23723	78	78	49	46	37	30	4833706	4833706	4770873	4747489	4584484	4361856	78	348629	4833706	50.61	175873	95057	11	20	0		78	4833706	50.61	4675		4483	99.96	0.13	TRUE
562.23724	148	148	92	68	49	34	5419329	5419329	5279178	5120431	4767724	4251798	148	425277	5419329	50.58	107184	56326	14	31	0.02		148	5419329	50.58	5523		5208	99.86	0.13	TRUE
562.23725	89	89	59	48	34	21	4868034	4868034	4795694	4724032	4500214	4049816	89	460065	4868034	50.66	192227	113134	8	16	0		89	4868034	50.66	4826		4568	99.96	0.31	TRUE
562.23726	88	88	58	46	35	23	5018464	5018464	4959193	4876742	4712193	4310908	88	486915	5018464	50.56	192055	113182	8	16	0		88	5018464	50.56	5051		4765	99.96	0.62	TRUE
562.23727	145	145	82	64	39	27	5296378	5296378	5154852	5032217	4611849	4193677	145	388730	5296378	50.65	161609	82220	12	24	0		145	5296378	50.65	5359		5069	99.96	0.31	TRUE
562.23728	152	152	86	71	50	35	4925109	4925109	4755569	4654729	4340858	3809280	152	283546	4925109	50.63	113022	54134	16	33	0		152	4925109	50.63	4961		4679	99.96	0.08	TRUE
562.23729	114	114	66	50	36	27	5138411	5138411	5035334	4934476	4718514	4408036	114	494844	5138411	50.48	173864	102485	10	20	0		114	5138411	50.48	5113		4826	99.96	0.08	TRUE
562.2373	110	110	67	47	35	27	5139372	5139372	5043680	4914038	4724292	4449374	110	517575	5139372	50.48	173837	102475	10	20	0		110	5139372	50.48	5113		4827	99.96	0.08	TRUE
562.23731	61	61	47	40	32	22	5045958	5045958	5017991	4967151	4830172	4484279	61	519978	5045958	50.5	192482	129148	8	16	0		61	5045958	50.5	5017		4742	99.96	0.62	TRUE
562.23732	91	91	59	49	33	23	5159409	5159409	5091779	5017655	4753449	4394519	91	501529	5159409	50.46	196399	98548	8	17	0		91	5159409	50.46	5183		4871	99.96	0.12	TRUE
562.23733	61	61	47	44	38	30	4898072	4898072	4871407	4852500	4775342	4515881	61	435852	4898072	50.55	164920	100878	10	19	0		61	4898072	50.55	4878		4642	99.96	0.08	TRUE
562.23734	120	120	78	62	47	28	4759726	4759726	4662427	4543783	4299129	3559827	120	381300	4759726	50.77	118915	49332	12	29	0		120	4759726	50.77	4707		4466	99.96	0.08	TRUE
562.23735	61	61	50	44	35	26	4879158	4879158	4851690	4808651	4660280	4312770	61	348673	4879158	50.33	193897	110648	11	19	0		61	4879158	50.33	4768		4542	99.96	0.64	TRUE
562.23736	98	98	60	44	31	21	5076526	5076526	4985705	4864103	4653107	4340719	98	563761	5076526	50.44	202475	114520	8	15	0		98	5076526	50.44	5020		4736	99.96	0.08	TRUE
562.23737	95	95	64	55	32	26	5050237	5050237	4965441	4905174	4543114	4330807	95	436240	5050237	50.72	180448	106261	10	19	0		95	5050237	50.72	5025		4774	99.96	0.08	TRUE
562.23738	127	127	60	50	38	27	5242964	5242964	5101042	5032307	4844098	4461144	127	451960	5242964	50.62	172538	97195	10	20	0.02		127	5242964	50.62	5377		5089	99.96	0.93	TRUE
562.23739	108	108	65	47	36	25	5148601	5148601	5052961	4917762	4747312	4363667	108	359810	5148601	50.38	185488	104922	10	19	0		108	5148601	50.38	5161		4857	99.96	0.08	TRUE
562.2374	156	156	85	68	48	30	5108688	5108688	4944570	4826678	4509954	3886174	156	263506	5108688	50.58	119343	55930	14	29	0		156	5108688	50.58	5090		4831	99.96	0.13	TRUE
562.23741	91	91	63	50	37	29	5174363	5174363	5110801	5016404	4821856	4534782	91	319350	5174363	50.7	180310	106034	11	21	0		91	5174363	50.7	5179		4918	99.96	0.08	TRUE
562.23742	115	115	72	53	39	26	5008372	5008372	4901538	4760001	4533952	4100263	115	378025	5008372	50.49	174008	85780	12	22	0		115	5008372	50.49	4983		4715	99.96	0.08	TRUE
562.23743	110	110	60	51	41	30	5101862	5101862	4996370	4930522	4773902	4381158	110	420593	5101862	50.67	143339	85986	11	22	0		110	5101862	50.67	5087		4808	99.96	0.08	TRUE
562.23744	89	89	58	50	38	27	4992304	4992304	4920174	4862158	4645604	4268359	89	402229	4992304	50.46	181144	98473	10	20	0		89	4992304	50.46	4927		4647	99.96	0.08	TRUE
562.23745	85	85	50	45	37	25	4876172	4876172	4801013	4766205	4631661	4195738	85	501665	4876172	50.49	175491	101842	9	19	0		85	4876172	50.49	4792		4532	99.96	0.08	TRUE
562.23746	97	97	63	52	35	26	5013144	5013144	4937419	4854297	4572042	4244725	97	523311	5013144	50.41	151975	98299	11	21	0		97	5013144	50.41	4921		4655	99.96	0.08	TRUE
562.23747	133	133	83	72	52	33	5242434	5242434	5131748	5054160	4690817	3962582	133	351731	5242434	50.66	106014	50959	15	33	0		133	5242434	50.66	5208		4922	99.96	0.13	TRUE
562.23748	112	112	66	50	35	26	5063850	5063850	4962625	4860246	4605558	4281027	112	408143	5063850	50.5	173683	101848	10	20	0		112	5063850	50.5	5126		4839	99.96	0.68	TRUE
562.23749	141	141	83	64	46	30	5266786	5266786	5131075	5007313	4697336	4091520	141	351731	5266786	50.72	146465	63200	13	28	0.04		141	5266786	50.72	5320		5035	99.86	0.13	TRUE
562.2375	78	78	59	49	33	26	5108863	5108863	5060307	4989306	4734964	4470569	78	433327	5108863	50.79	180447	109366	10	19	0		78	5108863	50.79	5101		4832	99.96	0.08	TRUE
562.23751	112	112	61	47	36	26	5146447	5146447	5037817	4931201	4765350	4445901	112	363967	5146447	50.39	182538	113091	10	19	0		112	5146447	50.39	5177		4870	99.96	0.08	TRUE
562.23752	93	93	54	46	35	22	5057275	5057275	4967339	4913245	4742234	4301531	93	486915	5057275	50.66	203862	123216	8	16	0		93	5057275	50.66	5110		4828	99.96	0.62	TRUE
562.23753	104	104	62	53	43	27	4818039	4818039	4718170	4652897	4463263	3869129	104	364077	4818039	50.46	143322	62807	12	23	0		104	4818039	50.46	4803		4555	99.88	0.08	TRUE
562.23754	87	87	56	44	32	24	5009479	5009479	4933943	4847210	4646256	4362982	87	530078	5009479	50.44	182537	114422	9	18	0		87	5009479	50.44	4910		4638	99.96	0.08	TRUE
562.23755	104	104	59	49	35	25	5080335	5080335	4981367	4915333	4691590	4364571	104	420984	5080335	50.5	186005	102001	9	18	0		104	5080335	50.5	5138		4848	99.96	0.62	TRUE
562.23756	225	225	141	104	59	29	4927815	4927815	4735149	4463514	3722495	2687637	225	231935	4927815	50.84	58357	26554	25	58	0		225	4927815	50.84	5015		4769	99.65	0.08	TRUE
562.23757	104	104	62	51	40	25	5035080	5035080	4933505	4853599	4687952	4160552	104	476786	5035080	50.68	172388	92331	10	20	0		104	5035080	50.68	5015		4769	99.96	0.39	TRUE
562.23758	86	86	60	51	36	27	5134587	5134587	5066945	5002116	4759974	4434880	86	433456	5134587	50.73	178679	109366	11	20	0		86	5134587	50.73	5144		4872	99.96	0.31	TRUE
562.23759	112	112	70	62	46	32	5062967	5062967	4968571	4907207	4663471	4155428	112	205881	5062967	50.61	122867	78032	16	28	0		112	5062967	50.61	4977		4732	99.96	0.08	TRUE
562.2376	110	110	73	60	40	32	5110385	5110385	5010209	4925998	4604737	4297169	110	244731	5110385	50.76	139817	83650	14	26	0		110	5110385	50.76	5133		4874	99.96	0.08	TRUE
562.23761	85	85	54	45	33	27	4987645	4987645	4918150	4858054	4681295	4473150	85	434342	4987645	50.55	185842	113079	9	17	0		85	4987645	50.55	4925		4644	99.96	0.08	TRUE
562.23762	76	76	55	47	42	29	4720472	4720472	4667869	4612467	4539038	4065731	76	291654	4720472	50.75	158137	85201	12	21	0		76	4720472	50.75	4625		4397	99.96	0.23	TRUE
562.23763	81	81	53	47	33	24	5157223	5157223	5093908	5055654	4823056	4496568	81	894690	5157223	50.4	196816	138900	9	17	0		81	5157223	50.4	5161		4873	99.96	0.08	TRUE
562.23764	85	85	55	44	34	22	5152384	5152384	5076574	4998185	4841086	4444470	85	518851	5152384	50.52	189273	125059	8	16	0		85	5152384	50.52	5162		4861	99.96	0.62	TRUE
562.23765	89	89	57	51	42	29	5136037	5136037	5063458	5021719	4872404	4399946	89	451301	5136037	50.59	158185	81822	10	21	0.06		89	5136037	50.59	5037		4774	99.96	0.08	TRUE
562.23766	125	125	64	52	38	25	5061537	5061537	4920599	4832239	4609067	4138083	125	362392	5061537	50.46	186498	72498	10	20	0		125	5061537	50.46	5005		4725	99.96	0.08	TRUE
562.23767	82	82	50	41	27	22	4988895	4988895	4913263	4842495	4627094	4446730	82	588901	4988895	50.58	228040	114524	6	14	0		82	4988895	50.58	4936		4668	99.96	0.08	TRUE
562.23768	66	66	41	38	29	24	4966476	4966476	4901707	4880773	4732470	4551636	66	483106	4966476	50.48	202447	128186	8	16	0		66	4966476	50.48	4860		4613	99.96	0.08	TRUE
562.23769	113	113	78	66	41	29	5250456	5250456	5179665	5098191	4698377	4278748	113	301647	5250456	50.68	159843	87086	13	25	0		113	5250456	50.68	5321		5026	99.96	0.08	TRUE
562.2377	87	87	63	51	45	32	4704562	4704562	4648993	4560875	4467450	4012385	87	251786	4704562	50.79	140472	75308	13	24	0		87	4704562	50.79	4594		4377	99.96	0.08	TRUE
562.23771	119	119	96	87	60	33	4552044	4552044	4483852	4412258	3937498	2924599	119	222975	4552044	50.74	63240	40617	22	45	0		119	4552044	50.74	4469		4276	99.96	0.08	TRUE
562.23772	77	77	51	44	35	21	5008653	5008653	4947310	4902762	4757030	4319130	77	515768	5008653	50.45	203109	125598	8	16	0		77	5008653	50.45	4955		4709	99.96	0.08	TRUE
562.23773	199	199	126	101	70	32	5117579	5117579	4947805	4757731	4212956	2806593	199	192254	5117579	50.76	57420	31623	28	58	0		199	5117579	50.76	5292		5005	99.96	0.08	TRUE
562.23774	74	74	48	45	41	29	4970836	4970836	4917248	4892627	4831052	4407779	74	447831	4970836	50.66	182326	87104	10	20	0		74	4970836	50.66	4983		4756	99.96	0.08	TRUE
562.23775	133	133	66	55	34	23	5188282	5188282	5019998	4935837	4603909	4219959	133	538158	5188282	50.39	182697	98611	9	19	0		133	5188282	50.39	5161		4870	99.96	0.08	TRUE
562.23776	92	92	55	44	34	25	5045700	5045700	4959846	4869178	4703500	4404750	92	450017	5045700	50.48	186498	113073	9	17	0		92	5045700	50.48	4994		4714	99.96	0.08	TRUE
562.23777	115	115	69	54	38	27	5142696	5142696	5045811	4926776	4664764	4303949	115	364031	5142696	50.41	169140	95441	11	21	0		115	5142696	50.41	5142		4839	99.96	0.08	TRUE
562.23778	113	113	74	60	38	27	5133129	5133129	5043080	4943366	4596313	4208264	113	402131	5133129	50.43	168513	84611	11	22	0		113	5133129	50.43	5111		4812	99.96	0.08	TRUE
562.23779	99	99	71	53	42	27	5156269	5156269	5085464	4957275	4782890	4267338	99	505748	5156269	50.46	156625	95857	11	22	0		99	5156269	50.46	5093		4820	99.96	0.12	TRUE
562.2378	77	77	39	33	29	21	4946162	4946162	4867824	4819617	4755439	4478959	77	526556	4946162	50.45	245960	178584	7	13	0		77	4946162	50.45	4903		4652	99.96	0.39	TRUE
562.23781	203	203	121	95	65	36	4980080	4980080	4794667	4599987	4107557	3032823	203	208992	4980080	50.67	60540	35895	27	53	0		203	4980080	50.67	5129		4816	99.96	0.44	TRUE
562.23782	166	166	124	97	56	33	4868140	4868140	4773733	4576354	3898800	3097128	166	199194	4868140	50.72	69628	30925	22	48	0		166	4868140	50.72	4920		4655	99.96	0.08	TRUE
562.23783	97	97	71	65	50	32	4793985	4793985	4736054	4693307	4469958	3839562	97	293974	4793985	50.74	120283	68296	15	28	0		97	4793985	50.74	4756		4503	99.34	0.39	TRUE
562.23784	66	66	46	44	37	30	4847095	4847095	4799459	4781444	4662190	4433818	66	349063	4847095	50.64	175670	102900	11	20	0		66	4847095	50.64	4692		4506	99.96	0.13	TRUE
562.23785	152	152	98	86	55	30	5162635	5162635	5034769	4951294	4475302	3576767	152	257093	5162635	50.56	102663	40964	18	37	0		152	5162635	50.56	5211		4955	99.96	0.39	TRUE
562.23786	112	112	70	60	48	33	4979658	4979658	4877624	4799769	4606347	4051418	112	263826	4979658	50.61	118385	68968	14	28	0		112	4979658	50.61	4904		4709	99.96	0.13	TRUE
562.23787	118	118	75	68	56	34	4864350	4864350	4773380	4721549	4513504	3768651	118	232404	4864350	50.68	102288	53791	16	32	0		118	4864350	50.68	4843		4589	99.96	0.08	TRUE
562.23788	105	105	74	70	52	31	5240608	5240608	5169319	5138863	4792140	4052974	105	349062	5240608	50.37	113470	56980	14	29	0		105	5240608	50.37	5167		4911	99.65	0.31	TRUE
562.23789	111	111	65	49	33	22	5131129	5131129	5022200	4899942	4664558	4297996	111	525736	5131129	50.44	185580	109837	9	18	0		111	5131129	50.44	5107		4809	99.96	0.08	TRUE
562.2379	95	95	55	50	44	31	4956162	4956162	4871330	4831872	4739040	4295097	95	345643	4956162	50.6	145719	86333	11	22	0.02		95	4956162	50.6	4918		4660	99.96	0.39	TRUE
562.23791	72	72	54	48	36	28	4961100	4961100	4914015	4873271	4654768	4357780	72	301647	4961100	50.77	173928	106261	12	21	0		72	4961100	50.77	4914		4675	99.96	0.08	TRUE
562.23792	81	81	57	49	35	27	5025551	5025551	4965964	4908944	4651813	4349958	81	318560	5025551	50.76	178774	105874	11	20	0.02		81	5025551	50.76	5017		4757	99.96	0.08	TRUE
562.23793	104	104	72	60	36	28	5195943	5195943	5119799	5039813	4621973	4312148	104	433347	5195943	50.78	165175	96483	12	22	0		104	5195943	50.78	5233		4963	99.96	0.08	TRUE
562.23794	168	168	99	82	54	32	5261383	5261383	5092063	4979798	4548111	3768787	168	425304	5261383	50.56	95408	43817	15	36	0.02		168	5261383	50.56	5296		5030	99.96	0.13	TRUE
562.23795	63	63	40	36	33	24	4880287	4880287	4830482	4799582	4763494	4441789	63	426533	4880287	50.77	193936	150494	9	16	0.02		63	4880287	50.77	4729		4499	99.96	0.45	TRUE
562.23796	114	114	70	61	49	34	5251701	5251701	5151753	5083968	4890782	4354013	114	319260	5251701	50.5	134249	71882	14	28	0		114	5251701	50.5	5214		4923	99.96	0.12	TRUE
562.23797	97	97	64	55	37	26	5121781	5121781	5040925	4978751	4702898	4298501	97	561680	5121781	50.55	151273	104923	10	20	0		97	5121781	50.55	5074		4788	99.96	0.08	TRUE
562.23798	94	94	55	49	39	24	5099286	5099286	5028536	4984607	4812256	4275223	94	418250	5099286	50.56	186529	89599	9	18	0		94	5099286	50.56	5081		4813	99.88	0.39	TRUE
562.23799	72	72	47	40	34	24	5114262	5114262	5052996	5003010	4900730	4545509	72	539594	5114262	50.51	203863	114902	7	16	0		72	5114262	50.51	5138		4864	99.96	0.08	TRUE
562.238	142	142	107	88	54	28	5177413	5177413	5093954	4972174	4416718	3476711	142	345489	5177413	50.48	84085	41044	15	38	0		142	5177413	50.48	5141		4870	99.96	0.28	TRUE
562.23801	128	128	82	64	46	31	5171388	5171388	5062254	4936634	4631916	4085883	128	376026	5171388	50.74	146601	55709	14	28	0		128	5171388	50.74	5133		4876	99.96	0.13	TRUE
562.23802	107	107	62	49	35	26	5026996	5026996	4919605	4825563	4610513	4309920	107	355849	5026996	50.45	179415	105025	11	19	0		107	5026996	50.45	4990		4709	99.96	0.08	TRUE
562.23803	66	66	49	41	33	22	4989875	4989875	4956601	4904589	4784273	4368514	66	525434	4989875	50.62	189385	121652	8	16	0		66	4989875	50.62	4988		4710	99.96	0.93	TRUE
562.23804	88	88	59	50	35	28	5076055	5076055	5004352	4941671	4693214	4436095	88	325604	5076055	50.79	173037	106261	12	21	0		88	5076055	50.79	5039		4782	99.96	0.11	TRUE
562.23805	108	108	64	52	38	26	5147026	5147026	5041310	4952959	4734270	4352155	108	355853	5147026	50.45	182622	94850	11	20	0.02		108	5147026	50.45	5142		4853	99.96	0.13	TRUE
562.23806	114	114	68	51	37	26	5156717	5156717	5058013	4930992	4719157	4353559	114	355819	5156717	50.43	179403	113091	11	20	0		114	5156717	50.43	5171		4873	99.96	0.08	TRUE
562.23807	68	68	39	36	32	24	4940108	4940108	4871737	4848102	4757770	4479316	68	489487	4940108	50.67	220895	119761	8	15	0		68	4940108	50.67	4879		4643	99.96	0.08	TRUE
562.23808	180	180	110	91	67	35	5226022	5226022	5063019	4940419	4545788	3438320	180	183654	5226022	50.61	78581	37890	21	47	0		180	5226022	50.61	5332		5025	99.96	0.08	TRUE
562.23809	80	80	44	40	33	25	5155103	5155103	5072479	5042984	4942996	4660627	80	496563	5155103	50.56	203864	121068	7	15	0		80	5155103	50.56	5211		4926	99.96	0.62	TRUE
562.2381	54	54	37	33	26	20	5017432	5017432	4977894	4947328	4847968	4654316	54	655889	5017432	50.58	268800	139478	6	13	0		54	5017432	50.58	4924		4697	99.88	0.08	TRUE
562.23811	114	114	64	55	37	27	5146456	5146456	5034707	4969772	4696782	4376896	114	461479	5146456	50.46	173904	76066	9	20	0		114	5146456	50.46	5101		4807	99.96	0.08	TRUE
562.23812	99	99	54	45	36	25	5092162	5092162	4964978	4896756	4756083	4377298	99	538263	5092162	50.46	182538	104831	10	18	0		99	5092162	50.46	5080		4791	99.96	0.23	TRUE
562.23813	70	70	51	43	37	24	5210330	5210330	5168675	5110630	5010302	4548419	70	497412	5210330	50.61	203862	112191	8	17	0		70	5210330	50.61	5243		4948	99.96	0.93	TRUE
562.23814	201	201	100	62	37	26	5484872	5484872	5237275	4950973	4553830	4151185	201	469198	5484872	50.36	162924	55254	12	26	0		201	5484872	50.36	5586		5247	99.96	1.54	TRUE
562.23815	87	87	56	49	40	28	5174385	5174385	5088171	5040670	4897449	4482455	87	406025	5174385	50.41	174865	103349	10	20	0		87	5174385	50.41	5171		4873	99.96	0.08	TRUE
562.23816	114	114	68	53	36	28	5150579	5150579	5036373	4936519	4657816	4359064	114	402106	5150579	50.46	179415	97785	10	20	0		114	5150579	50.46	5137		4832	99.96	0.08	TRUE
562.23817	125	125	84	64	47	31	5135967	5135967	5039586	4900224	4620671	4076782	125	351830	5135967	50.67	146489	60927	13	27	0.02		125	5135967	50.67	5096		4839	99.96	0.13	TRUE
562.23818	109	109	61	49	37	23	5122572	5122572	5012415	4930937	4782974	4302594	109	484371	5122572	50.41	180601	110556	9	18	0		109	5122572	50.41	5106		4833	99.96	0.08	TRUE
562.23819	82	82	58	50	37	29	5147070	5147070	5093155	5038047	4837851	4545064	82	499238	5147070	50.61	178556	102745	10	20	0		82	5147070	50.61	5133		4873	99.96	0.23	TRUE
562.2382	88	88	53	47	36	26	5210198	5210198	5126996	5081874	4902107	4513863	88	422155	5210198	50.53	180447	106033	10	19	0		88	5210198	50.53	5240		4961	99.96	0.08	TRUE
562.23821	117	117	67	58	41	29	5150274	5150274	5037009	4965935	4688759	4255493	117	308610	5150274	50.79	159218	96478	13	24	0		117	5150274	50.79	5160		4892	99.96	0.11	TRUE
562.23822	118	118	68	52	36	28	5236468	5236468	5108296	4999253	4754444	4486855	118	328512	5236468	50.63	161182	109335	13	22	0		118	5236468	50.63	5306		5010	99.96	0.08	TRUE
562.23823	71	71	54	45	36	27	5086308	5086308	5050244	4981572	4819007	4504356	71	392042	5086308	50.63	180722	106034	11	19	0		71	5086308	50.63	5083		4839	99.96	0.08	TRUE
562.23824	43	43	33	32	30	23	4932844	4932844	4905477	4899113	4867051	4620940	43	745595	4932844	50.49	298677	158905	6	12	0		43	4932844	50.49	4873		4637	99.96	0.08	TRUE
562.23825	79	79	47	43	35	24	5114728	5114728	5029292	5004150	4891196	4503625	79	527837	5114728	50.36	221686	102911	9	16	0		79	5114728	50.36	5137		4879	99.88	0.08	TRUE
562.23826	97	97	75	67	48	31	4796311	4796311	4744867	4683854	4358798	3745375	97	278703	4796311	50.7	114023	62283	15	29	0		97	4796311	50.7	4740		4509	99.96	0.08	TRUE
562.23827	81	81	45	41	32	24	4833189	4833189	4747989	4718463	4575042	4274809	81	483468	4833189	50.65	203627	118624	9	16	0		81	4833189	50.65	4779		4554	99.96	0.08	TRUE
562.23828	152	152	89	70	50	28	5143699	5143699	5007774	4873656	4536065	3729641	152	422677	5143699	50.68	124910	46305	14	31	0.02		152	5143699	50.68	5139		4860	99.96	0.13	TRUE
562.23829	68	68	47	42	34	23	5041144	5041144	4994746	4956918	4826008	4442391	68	475389	5041144	50.54	185897	130942	9	16	0		68	5041144	50.54	5039		4763	99.96	0.62	TRUE
562.2383	113	113	58	48	34	25	5094303	5094303	4987227	4915970	4666153	4318928	113	499237	5094303	50.58	180450	104231	10	19	0		113	5094303	50.58	5056		4803	99.96	0.13	TRUE
562.23831	172	172	92	69	51	35	5235529	5235529	5064648	4896794	4621424	4038689	172	351716	5235529	50.62	102893	54706	15	33	0		172	5235529	50.62	5297		5004	99.96	0.13	TRUE
562.23832	137	137	71	57	38	31	5169171	5169171	5029313	4931064	4607762	4336060	137	308610	5169171	50.7	144224	87086	14	25	0		137	5169171	50.7	5230		4941	99.96	0.16	TRUE
562.23833	71	71	48	47	41	28	4858880	4858880	4811287	4801330	4699762	4251219	71	428987	4858880	50.58	175158	85151	9	19	0.02		71	4858880	50.58	4715		4491	99.96	0.08	TRUE
562.23834	94	94	59	47	36	24	5085689	5085689	5008242	4926611	4774134	4360912	94	518673	5085689	50.55	180608	110514	9	18	0		94	5085689	50.55	5054		4788	99.96	0.13	TRUE
562.23835	87	87	61	55	39	27	4959184	4959184	4901602	4856046	4624414	4203389	87	531115	4959184	50.53	153796	80513	10	21	0		87	4959184	50.53	4874		4631	99.96	0.12	TRUE
562.23836	75	75	52	47	38	24	4788254	4788254	4740979	4701260	4543180	4022067	75	492089	4788254	50.8	153558	95009	9	18	0		75	4788254	50.8	4711		4478	99.96	0.08	TRUE
562.23837	102	102	63	53	41	29	5059312	5059312	4973164	4906174	4716464	4295282	102	450530	5059312	50.62	157480	72100	11	22	0		102	5059312	50.62	4957		4688	99.96	0.08	TRUE
562.23838	106	106	68	57	45	30	5251446	5251446	5157900	5080147	4886884	4316018	106	370524	5251446	50.65	163355	72020	12	24	0		106	5251446	50.65	5273		4987	99.96	0.31	TRUE
562.23839	171	171	92	67	50	35	5230720	5230720	5070361	4891831	4625076	4077487	171	264846	5230720	50.62	102893	54706	15	33	0		171	5230720	50.62	5282		4991	99.96	0.13	TRUE
562.2384	96	96	60	57	47	33	4886478	4886478	4802745	4778932	4590130	4118831	96	271729	4886478	50.72	126410	68899	14	26	0		96	4886478	50.72	4867		4631	99.96	0.08	TRUE
562.23841	96	96	53	45	37	28	5110364	5110364	5017384	4964470	4860524	4535621	96	620727	5110364	50.57	169292	94828	9	19	0		96	5110364	50.57	5097		4817	99.96	0.08	TRUE
562.23842	195	195	120	101	61	28	5227257	5227257	5035907	4912312	4268179	3009442	195	209057	5227257	50.46	68302	33582	22	50	0.02		195	5227257	50.46	5352		5073	99.65	0.39	TRUE
562.23843	73	73	47	40	34	25	5015679	5015679	4960022	4906970	4801659	4485252	73	525578	5015679	50.61	203863	113262	8	17	0		73	5015679	50.61	4985		4739	99.96	0.08	TRUE
562.23844	90	90	62	49	36	29	5118710	5118710	5054524	4954090	4756596	4522904	90	280173	5118710	50.61	175469	106034	13	21	0		90	5118710	50.61	5124		4877	99.96	0.08	TRUE
562.23845	95	95	60	46	36	24	5069970	5069970	4995299	4895890	4733048	4303643	95	514084	5069970	50.5	186027	109591	10	19	0		95	5069970	50.5	5095		4792	99.96	0.62	TRUE
562.23846	92	92	62	51	39	25	4943492	4943492	4873186	4798908	4616227	4132864	92	460065	4943492	50.58	174701	101990	10	19	0		92	4943492	50.58	4948		4673	99.96	0.62	TRUE
562.23847	183	183	117	92	64	30	4916829	4916829	4752800	4588895	4123339	2894284	183	226183	4916829	50.59	58840	33957	23	50	0		183	4916829	50.59	4945		4710	99.34	0.67	TRUE
562.23848	92	92	58	49	35	24	4983467	4983467	4899859	4841879	4609934	4235403	92	364395	4983467	50.72	181789	109239	10	18	0		92	4983467	50.72	4972		4709	99.96	0.11	TRUE
562.23849	98	98	70	60	44	35	5216562	5216562	5163517	5093941	4837970	4509286	98	224196	5216562	50.59	139879	87089	15	27	0		98	5216562	50.59	5276		4999	99.96	0.08	TRUE
562.2385	127	127	76	59	40	31	5358357	5358357	5256363	5131186	4826744	4512397	127	382363	5358357	50.69	159114	90825	13	24	0.02		127	5358357	50.69	5462		5156	99.96	0.08	TRUE
562.23851	103	103	60	50	34	23	5097984	5097984	4997058	4923738	4672504	4294033	103	525737	5097984	50.44	182622	113061	10	18	0		103	5097984	50.44	5073		4778	99.96	0.08	TRUE
562.23852	76	76	52	47	35	24	5251386	5251386	5203409	5168012	4981671	4615613	76	535341	5251386	50.67	189396	113153	8	16	0		76	5251386	50.67	5285		4985	99.96	0.93	TRUE
562.23853	95	95	57	48	39	27	5229545	5229545	5143621	5086444	4955788	4544223	95	486800	5229545	50.65	176088	90206	9	19	0		95	5229545	50.65	5361		5052	99.96	0.62	TRUE
562.23854	135	135	91	74	50	33	5271664	5271664	5168246	5049307	4633145	3994139	135	351748	5271664	50.64	107525	53903	15	33	0		135	5271664	50.64	5320		5033	99.65	0.13	TRUE
562.23855	174	174	103	92	61	29	5076083	5076083	4908282	4829594	4314816	3120816	174	298623	5076083	50.68	68812	37799	20	45	0		174	5076083	50.68	5171		4901	99.96	1.02	TRUE
562.23856	186	186	120	96	67	34	5068283	5068283	4909239	4747090	4276040	3080047	186	191759	5068283	50.56	62479	34397	24	52	0		186	5068283	50.56	5128		4861	99.34	0.67	TRUE
562.23857	73	73	54	54	45	31	4945449	4945449	4901955	4901955	4737900	4249883	73	402620	4945449	50.6	150221	80509	11	23	0		73	4945449	50.6	4803		4592	99.92	0.08	TRUE
562.23858	84	84	58	50	34	26	5048718	5048718	4981052	4920462	4658532	4358271	84	390148	5048718	50.81	178661	106034	11	20	0		84	5048718	50.81	5044		4788	99.96	0.08	TRUE
562.23859	110	110	75	67	48	31	4840757	4840757	4766649	4705454	4388402	3710784	110	312132	4840757	50.69	106303	52392	14	30	0		110	4840757	50.69	4809		4546	99.04	0.08	TRUE
562.2386	99	99	66	56	36	29	5148672	5148672	5065961	4994841	4688139	4407766	99	433327	5148672	50.8	178678	106034	11	21	0		99	5148672	50.8	5162		4889	99.96	0.08	TRUE
562.23861	120	120	72	61	42	30	5183752	5183752	5076113	4998213	4690183	4290019	120	287584	5183752	50.53	177980	79343	13	24	0		120	5183752	50.53	5223		4931	99.96	0.08	TRUE
562.23862	138	138	84	75	53	31	5410663	5410663	5287430	5218143	4890345	4129385	138	459638	5410663	50.62	128947	53530	15	30	0		138	5410663	50.62	5416		5103	99.96	0.67	TRUE
562.23863	111	111	67	53	38	27	5267545	5267545	5174983	5075991	4833831	4431392	111	504579	5267545	50.49	175503	94373	9	20	0		111	5267545	50.49	5293		4998	99.96	0.12	TRUE
562.23864	212	212	132	100	66	27	5232989	5232989	5029576	4801688	4231957	2776342	212	232251	5232989	50.52	51580	33006	24	56	0		212	5232989	50.52	5368		5073	99.55	0.31	TRUE
562.23865	126	126	68	52	37	26	5149494	5149494	5015513	4896724	4653507	4274731	126	654465	5149494	50.44	172373	91055	11	21	0		126	5149494	50.44	5223		4934	99.96	0.08	TRUE
562.23866	164	164	91	75	57	33	5420388	5420388	5259840	5153169	4838912	3966084	164	351646	5420388	50.62	102413	46261	17	36	0		164	5420388	50.62	5491		5180	99.34	1.17	TRUE
562.23867	107	107	69	53	37	24	4992312	4992312	4898198	4788759	4519883	4085288	107	514055	4992312	50.68	167325	94482	10	19	0		107	4992312	50.68	5000		4745	99.34	0.39	TRUE
562.23868	88	88	65	57	43	25	4763952	4763952	4708944	4647886	4417961	3720997	88	337274	4763952	50.61	160970	63600	11	23	0		88	4763952	50.61	4753		4524	99.96	0.08	TRUE
562.23869	110	110	81	68	53	33	4858831	4858831	4794132	4706705	4453375	3650847	110	312113	4858831	50.81	96080	53306	15	33	0		110	4858831	50.81	4844		4571	99.96	0.62	TRUE
562.2387	87	87	57	50	43	31	4901829	4901829	4844459	4795984	4681095	4223874	87	290292	4901829	50.56	175878	76356	11	22	0		87	4901829	50.56	4891		4647	99.92	0.45	TRUE
562.23871	105	105	61	51	36	26	4979947	4979947	4875935	4804289	4576138	4238545	105	354541	4979947	50.44	173832	102426	10	20	0.02		105	4979947	50.44	4939		4667	99.96	0.08	TRUE
562.23872	157	157	91	77	49	30	5282505	5282505	5139620	5044078	4590829	3876911	157	362509	5282505	50.47	103377	47231	14	32	0.02		157	5282505	50.47	5382		5029	99.96	0.08	TRUE
562.23873	71	71	52	48	40	25	4941480	4941480	4904285	4872750	4736300	4135075	71	392323	4941480	50.57	186679	102828	10	19	0		71	4941480	50.57	4868		4608	99.96	0.11	TRUE
562.23874	87	87	56	50	35	29	5071742	5071742	4995521	4953230	4691636	4465892	87	475022	5071742	50.79	173037	95160	11	21	0		87	5071742	50.79	5046		4783	99.96	0.11	TRUE
562.23875	78	78	47	41	31	24	5044279	5044279	4968405	4927970	4782979	4548051	78	576270	5044279	50.57	202447	114829	8	16	0		78	5044279	50.57	4995		4718	99.96	0.08	TRUE
562.23876	112	112	61	47	37	28	5093306	5093306	4981003	4892094	4745571	4437279	112	430129	5093306	50.35	165657	100231	10	21	0.02		112	5093306	50.35	5077		4790	99.96	0.08	TRUE
562.23877	69	69	47	41	31	21	4978689	4978689	4931831	4887054	4708913	4324771	69	578203	4978689	50.54	242699	175684	8	14	0		69	4978689	50.54	4963		4693	99.96	0.39	TRUE
562.23878	100	100	62	57	49	33	4973726	4973726	4886450	4852628	4701855	4102319	100	268865	4973726	50.5	123670	69242	14	27	0		100	4973726	50.5	4981		4719	99.96	0.08	TRUE
562.23879	168	168	94	69	51	36	5232340	5232340	5067641	4883806	4599894	4051657	168	351631	5232340	50.62	98707	54706	16	34	0		168	5232340	50.62	5288		5000	99.96	0.13	TRUE
562.2388	51	51	39	34	27	20	4700997	4700997	4670946	4633177	4514508	4251872	51	463051	4700997	50.41	202368	154952	9	15	0		51	4700997	50.41	4550		4330	99.96	0.08	TRUE
562.23881	66	66	54	47	38	29	5099456	5099456	5072373	5026746	4870933	4566903	66	319160	5099456	50.68	175467	110475	11	20	0		66	5099456	50.68	5075		4829	99.96	0.08	TRUE
562.23882	112	112	50	38	31	22	5053726	5053726	4916580	4824532	4707641	4409760	112	466227	5053726	50.64	205921	133019	8	16	0		112	5053726	50.64	5045		4804	99.96	0.45	TRUE
562.23883	68	68	46	40	31	24	5052462	5052462	4994148	4949641	4787343	4524337	68	413759	5052462	50.55	230787	123811	9	16	0		68	5052462	50.55	5015		4754	99.96	0.08	TRUE
562.23884	124	124	74	58	39	27	5285119	5285119	5175112	5059190	4754102	4322304	124	308599	5285119	50.64	165297	96478	13	23	0		124	5285119	50.64	5362		5054	99.96	0.11	TRUE
562.23885	96	96	62	52	37	25	5127156	5127156	5056916	4991754	4758099	4316555	96	448368	5127156	50.4	174535	105520	9	19	0		96	5127156	50.4	5110		4814	99.96	0.12	TRUE
562.23886	103	103	55	45	36	24	5091929	5091929	4987266	4924335	4781689	4333693	103	486775	5091929	50.6	183533	108142	9	18	0		103	5091929	50.6	5164		4878	99.96	0.62	TRUE
562.23887	90	90	49	40	32	23	5025226	5025226	4940970	4876158	4758581	4417700	90	475278	5025226	50.53	198576	113602	9	17	0		90	5025226	50.53	4968		4732	99.96	0.08	TRUE
562.23888	99	99	60	52	44	30	5094732	5094732	5006822	4949951	4796146	4303058	99	451301	5094732	50.64	158185	71926	10	23	0		99	5094732	50.64	4987		4710	99.96	0.08	TRUE
562.23889	85	85	55	47	35	23	4946689	4946689	4874021	4815913	4623515	4218766	85	460073	4946689	50.64	174701	113134	9	17	0		85	4946689	50.64	4949		4678	99.96	0.62	TRUE
562.2389	142	142	80	67	45	30	5205964	5205964	5056079	4966408	4609938	4064204	142	347821	5205964	50.39	112750	60402	13	27	0		142	5205964	50.39	5232		4916	99.96	0.08	TRUE
562.23891	103	103	63	53	37	24	5141720	5141720	5055075	4987142	4742048	4292968	103	408087	5141720	50.47	192151	110022	9	18	0		103	5141720	50.47	5198		4928	99.96	0.62	TRUE
562.23892	97	97	63	57	45	32	5121470	5121470	5058536	5014567	4815938	4347280	97	462777	5121470	50.32	166657	60352	11	24	0.02		97	5121470	50.32	5222		4918	99.96	0.12	TRUE
562.23893	150	150	88	67	47	33	5292087	5292087	5148274	5004314	4660969	4164914	150	375787	5292087	50.73	120652	56676	15	30	0		150	5292087	50.73	5307		5030	99.96	0.44	TRUE
562.23894	106	106	66	51	38	27	5186766	5186766	5085122	4988757	4763794	4385918	106	388657	5186766	50.69	166933	98391	12	22	0		106	5186766	50.69	5231		4938	99.96	0.08	TRUE
562.23895	108	108	65	49	31	24	5169897	5169897	5075743	4957806	4671216	4421962	108	424784	5169897	50.75	186463	117783	10	18	0		108	5169897	50.75	5181		4912	99.96	0.08	TRUE
562.23896	91	91	57	46	38	22	4879270	4879270	4803712	4727774	4609127	4047946	91	460066	4879270	50.61	174701	109514	9	18	0		91	4879270	50.61	4857		4594	99.96	0.62	TRUE
562.23897	117	117	81	72	49	33	5024431	5024431	4943313	4874485	4467037	3868928	117	327460	5024431	50.46	105057	52086	14	32	0		117	5024431	50.46	4892		4666	99.96	0.08	TRUE
562.23898	102	102	66	59	46	34	5043503	5043503	4952056	4898467	4684072	4252526	102	481040	5043503	50.31	145110	61172	12	26	0.02		102	5043503	50.31	5047		4805	99.88	0.19	TRUE
562.23899	112	112	69	61	43	28	5216532	5216532	5116203	5062067	4796739	4280806	112	269677	5216532	50.61	162133	96478	13	24	0		112	5216532	50.61	5306		5010	99.96	0.08	TRUE
562.239	121	121	74	61	38	29	5140516	5140516	5043904	4952879	4595908	4258159	121	424832	5140516	50.74	152901	83417	12	24	0		121	5140516	50.74	5190		4923	99.96	0.08	TRUE
562.23901	132	132	80	64	50	28	5407692	5407692	5283734	5165866	4920649	4155753	132	364312	5407692	50.32	131484	62812	13	27	0		132	5407692	50.32	5500		5201	99.96	0.91	TRUE
562.23902	164	164	81	61	45	31	5272121	5272121	5089802	4954052	4680781	4205552	164	431155	5272121	50.61	136894	61246	13	27	0		164	5272121	50.61	5338		5064	99.96	0.18	TRUE
562.23903	92	92	45	37	31	23	4967597	4967597	4856504	4797162	4709427	4433675	92	523251	4967597	50.55	204732	118755	8	16	0.02		92	4967597	50.55	4883		4649	99.96	0.08	TRUE
562.23904	120	120	76	63	45	32	5113159	5113159	5009681	4912862	4625969	4193836	120	264680	5113159	50.39	131882	80044	15	27	0		120	5113159	50.39	5095		4830	99.65	0.17	TRUE
562.23905	59	59	36	33	27	21	4838788	4838788	4785936	4765665	4679704	4455926	59	447859	4838788	50.61	273124	132451	7	13	0		59	4838788	50.61	4699		4476	99.96	0.08	TRUE
562.23906	167	167	102	81	56	31	5096475	5096475	4952436	4797088	4409790	3455136	167	254610	5096475	50.66	103377	41655	19	40	0		167	5096475	50.66	5194		4893	99.96	0.49	TRUE
562.23907	85	85	57	47	33	22	4979207	4979207	4906017	4835512	4630818	4241915	85	454752	4979207	50.7	186996	109239	9	17	0		85	4979207	50.7	4995		4729	99.96	0.11	TRUE
562.23908	103	103	55	43	31	23	4987754	4987754	4874080	4792273	4615126	4330544	103	526716	4987754	50.5	185841	113106	9	17	0		103	4987754	50.5	4909		4641	99.96	0.08	TRUE
562.23909	144	144	80	65	38	26	5302830	5302830	5166915	5075260	4675584	4261870	144	304326	5302830	50.62	166801	98302	13	23	0		144	5302830	50.62	5443		5140	99.96	0.08	TRUE
562.2391	124	124	80	66	49	29	5202103	5202103	5108468	5011801	4749553	4000911	124	381314	5202103	50.42	125614	53308	12	28	0		124	5202103	50.42	5177		4874	99.96	0.54	TRUE
562.23911	106	106	65	52	41	29	5116775	5116775	5023133	4929199	4750181	4323465	106	325474	5116775	50.82	166692	87086	12	23	0		106	5116775	50.82	5125		4849	99.65	0.11	TRUE
562.23912	114	114	72	58	42	28	5017003	5017003	4917442	4818719	4577606	4064037	114	354541	5017003	50.38	142101	69189	12	23	0		114	5017003	50.38	4988		4708	99.96	0.08	TRUE
562.23913	45	45	35	34	29	22	4941523	4941523	4922324	4914177	4835725	4592399	45	496511	4941523	50.44	239224	139478	8	14	0		45	4941523	50.44	4879		4639	99.96	0.08	TRUE
562.23914	102	102	74	69	50	32	4969563	4969563	4907131	4864468	4517315	3869804	102	262274	4969563	50.5	101608	56875	15	30	0		102	4969563	50.5	4908		4685	99.96	0.12	TRUE
562.23915	85	85	53	44	35	25	5011354	5011354	4935201	4871779	4728002	4414737	85	514995	5011354	50.49	202447	104956	9	18	0		85	5011354	50.49	4930		4673	99.96	0.12	TRUE
562.23916	97	97	57	45	35	25	4997171	4997171	4899680	4811360	4656625	4308994	97	440427	4997171	50.53	174132	102473	9	18	0		97	4997171	50.53	5037		4767	99.96	0.08	TRUE
562.23917	103	103	60	48	39	25	5170503	5170503	5076325	4991913	4865561	4351858	103	404512	5170503	50.5	186097	97247	10	19	0		103	5170503	50.5	5233		4923	99.96	0.62	TRUE
562.23918	94	94	60	51	34	25	5139488	5139488	5051261	4988212	4719292	4395635	94	341891	5139488	50.47	201013	110532	10	19	0		94	5139488	50.47	5145		4873	99.96	0.08	TRUE
562.23919	71	71	46	40	32	23	4971384	4971384	4911499	4869023	4750660	4437159	71	512172	4971384	50.56	231810	127762	8	15	0		71	4971384	50.56	4898		4663	99.96	0.08	TRUE
562.2392	143	143	94	82	63	30	4876679	4876679	4760051	4682297	4337659	3102557	143	237038	4876679	50.59	68774	39986	19	43	0		143	4876679	50.59	4874		4601	99.96	0.08	TRUE
562.23921	59	59	40	36	31	21	5069100	5069100	5026264	4997227	4928170	4577774	59	664624	5069100	50.54	193291	133135	7	14	0		59	5069100	50.54	5071		4800	99.96	0.62	TRUE
562.23922	81	81	55	48	34	23	5116200	5116200	5061340	5011504	4752917	4339541	81	518425	5116200	50.62	196008	109243	8	17	0		81	5116200	50.62	5144		4873	99.96	0.19	TRUE
562.23923	101	101	62	49	35	26	5083794	5083794	5003124	4917224	4673437	4318579	101	424686	5083794	50.81	172787	109372	11	19	0		101	5083794	50.81	5062		4817	99.96	0.08	TRUE
562.23924	86	86	47	40	31	24	4915471	4915471	4825730	4775695	4650746	4396551	86	473511	4915471	50.52	202430	113313	8	16	0		86	4915471	50.52	4847		4587	99.96	0.08	TRUE
562.23925	142	142	71	56	36	23	5200178	5200178	5020524	4910539	4581787	4118943	142	445884	5200178	50.4	168513	94850	10	21	0		142	5200178	50.4	5194		4893	99.96	0.11	TRUE
562.23926	62	62	42	39	32	23	4871271	4871271	4817250	4797943	4686635	4387340	62	551830	4871271	50.6	189273	113159	7	15	0		62	4871271	50.6	4835		4595	99.96	0.62	TRUE
562.23927	151	151	86	72	54	34	5224551	5224551	5080970	4986036	4707392	3978201	151	395997	5224551	50.64	95061	58661	15	33	0		151	5224551	50.64	5219		4945	99.96	0.13	TRUE
562.23928	93	93	59	52	41	28	5030818	5030818	4949679	4901367	4710712	4244899	93	451318	5030818	50.64	157298	76680	10	21	0		93	5030818	50.64	4911		4655	99.96	0.08	TRUE
562.23929	105	105	54	42	31	21	5041640	5041640	4924191	4832885	4652507	4321835	105	525738	5041640	50.4	202446	114518	8	16	0		105	5041640	50.4	4968		4693	99.96	0.08	TRUE
562.2393	93	93	64	58	44	31	4839366	4839366	4773635	4728550	4505979	3997507	93	413852	4839366	50.76	129181	65927	13	25	0		93	4839366	50.76	4819		4568	99.96	0.39	TRUE
562.23931	80	80	41	34	29	21	5114890	5114890	5023808	4973388	4891804	4626538	80	685711	5114890	50.53	219244	176665	7	13	0		80	5114890	50.53	5138		4865	99.96	0.45	TRUE
562.23932	105	105	61	48	34	23	5082602	5082602	4984908	4884780	4673581	4304559	105	525736	5082602	50.43	185524	109837	9	18	0		105	5082602	50.43	5028		4743	99.96	0.08	TRUE
562.23933	120	120	69	55	34	20	5244837	5244837	5122484	5031498	4725900	4246412	120	450363	5244837	50.49	203109	110544	9	17	0		120	5244837	50.49	5231		4941	99.96	0.08	TRUE
562.23934	87	87	59	53	36	26	5047888	5047888	4989515	4946048	4661397	4303456	87	431354	5047888	50.43	174535	98131	9	20	0		87	5047888	50.43	5038		4764	99.96	0.12	TRUE
562.23935	134	134	71	58	40	24	5166319	5166319	5023352	4926430	4640272	4092905	134	439420	5166319	50.53	170604	66657	10	21	0		134	5166319	50.53	5266		4986	99.96	0.62	TRUE
562.23936	94	94	52	38	27	19	5005242	5005242	4908931	4802623	4614283	4349099	94	525738	5005242	50.4	254448	132430	7	14	0		94	5005242	50.4	4901		4639	99.96	0.08	TRUE
562.28838	178	104	61	53	35	27	5379274	5340593	5233504	5184940	4887691	4576514	142	458919	5368097	50.57	193809	97014	11	21	0		178	5379274	50.574295	5530		5209	99.96	0.81	TRUE
562.28839	183	96	60	48	32	23	5278221	5236343	5145878	5062923	4813309	4509337	127	413353	5256787	50.76	198323	110763	9	17	0		183	5278221	50.76832	5417		5120	99.96	0.49	TRUE
562.2884	190	121	79	73	53	28	4759305	4733289	4627542	4577643	4240894	3392097	143	254930	4748595	50.62	107519	41106	15	32	0		190	4759305	50.62653	4782		4531	99.96	0.08	TRUE
562.28841	141	94	59	47	40	29	4887399	4866730	4768264	4670240	4562889	4157643	111	352772	4879160	50.47	146477	80899	11	22	0		141	4887399	50.469994	4903		4640	99.96	0.17	TRUE
562.28844	478	89	56	44	28	24	5336216	5162614	5090381	5008822	4741899	4606320	197	484864	5228502	50.7	191061	121806	9	18	0		478	5336216	50.480698	5613		5334	99.96	1.58	TRUE
562.28845	255	89	59	52	37	29	5440829	5368175	5289961	5249086	4994565	4704226	141	458932	5402191	50.45	191062	94658	10	21	0		255	5440829	50.40445	5647		5324	99.96	1.47	TRUE
562.28846	135	87	56	44	28	24	5177844	5153563	5081863	4997551	4731101	4595705	112	708629	5170495	50.83	178652	121810	9	17	0		135	5177844	50.831486	5228		4947	99.96	0.08	TRUE
562.30349	7	7	3	3	3	2	5235096	5235096	5225807	5225807	5225807	5181701	7	5074278	5235096	50.49	5074278	5074278	1	1	5.73		7	5235096	50.492283	5495	5364	5022	99.96	0.73	TRUE
562.31449	192	110	75	61	47	29	5084904	5053732	4978938	4876928	4632654	3944586	129	359472	5066651	50.62	123883	59925	13	27	0		192	5084904	50.619617	5201		4922	99.96	0.49	TRUE
562.3145	172	115	79	62	47	30	4896021	4872628	4788756	4667213	4412257	3758458	133	388396	4884571	50.84	120832	51549	13	29	0		172	4896021	50.8429	4932		4661	99.96	1.31	TRUE
562.31451	177	114	80	64	46	29	5080513	5052967	4983118	4869955	4564271	3941380	133	359472	5066676	50.61	126451	62677	13	27	0		177	5080513	50.62235	5205		4921	99.81	0.46	TRUE
562.31452	133	86	63	58	48	32	4828309	4807960	4758029	4716547	4525688	3976095	100	274690	4817195	50.91	106529	80843	14	27	0		133	4828309	50.916107	4819		4568	99.96	0.24	TRUE
562.31454	111	40	32	29	27	21	4752666	4728604	4715155	4692072	4668323	4446418	51	500053	4736683	50.73	283153	148441	7	13	0		111	4752666	50.740616	4690		4475	99.96	0.39	TRUE
562.31457	518	120	89	74	53	33	5059055	4880321	4815024	4708976	4376882	3667623	234	282101	4951102	50.55	89288	43471	16	35	0		518	5059055	50.379826	5270		5030	99.96	1.63	TRUE
562.31458	198	107	84	72	48	26	4916581	4885241	4831227	4746060	4340497	3540510	123	411355	4895286	50.47	114638	46103	12	29	0		198	4916581	50.475197	4948		4707	99.96	0.14	TRUE
562.31459	311	144	88	73	55	36	5199116	5137107	5009724	4900350	4589580	3926367	174	199391	5158606	50.58	94300	51437	18	35	0		311	5199116	50.611046	5458		5168	99.96	0.39	TRUE
562.3146	200	58	41	37	28	25	4981730	4933971	4907858	4881711	4737185	4625621	77	513285	4946012	50.9	281970	118975	7	13	0		200	4981730	50.926025	4969		4755	99.65	1	TRUE
562.31462	88	29	26	24	24	18	4818942	4798981	4789904	4775055	4775055	4548111	32	606035	4801217	50.53	300228	198063	5	10	0		88	4818942	50.52964	4701		4475	99.96	0.17	TRUE
562.31463	186	70	56	50	42	32	4794425	4755273	4721409	4677923	4539814	4218475	89	421514	4768217	50.63	128178	81830	11	23	0		186	4794425	50.628803	4834		4586	99.96	0.08	TRUE
562.31464	240	89	63	54	39	26	5121061	5059932	5001466	4938402	4697822	4246991	133	438132	5088959	50.69	176168	99886	10	20	0		240	5121061	50.693302	5287		5004	99.96	0.57	TRUE
562.31465	42	11	10	10	10	9	4644141	4634560	4633027	4633027	4633027	4597957	17	1786269	4638275	50.45	690002	633953	2	4	0		42	4644141	50.44976	4498		4290	99.96	0.08	TRUE
562.31466	248	119	91	84	59	33	4761145	4718186	4651837	4604842	4193231	3228344	135	258453	4728939	50.72	73471	45607	20	40	0		248	4761145	50.718872	4847		4613	99.96	0.46	TRUE
562.37106	252	80	47	41	31	23	5103438	5042121	4948718	4902213	4761198	4495807	105	576016	5058249	50.44	256096	113286	8	15	0		252	5103438	50.450676	5153		4884	99.96	0.08	TRUE
562.37108	194	87	67	61	42	31	5178240	5142001	5089031	5038859	4730135	4321823	106	380002	5155055	50.71	144075	78468	13	25	0		194	5178240	50.71698	5127		4876	99.96	0.62	TRUE
562.37109	281	174	125	102	62	29	4722451	4684760	4554068	4382056	3760746	2562850	199	301170	4701055	50.66	53653	31042	25	54	0		281	4722451	50.66494	4908		4645	99.96	0.18	TRUE
562.37111	330	185	129	105	61	26	4733608	4677743	4520182	4344358	3630629	2351714	219	301170	4699793	50.66	50391	29756	26	58	0		330	4733608	50.667038	4963		4702	99.96	0.36	TRUE
562.37112	366	97	72	63	46	29	5094321	4993700	4921321	4861363	4576061	3935690	134	408117	5016936	50.54	113360	65336	13	27	0		366	5094321	50.46215	5200		4923	99.96	1.6	TRUE
562.42635	256	84	48	42	33	28	5286714	5221104	5135267	5090436	4946244	4776239	123	461639	5247607	50.73	218317	109547	9	17	0		256	5286714	50.75374	5517		5203	99.96	0.08	TRUE
562.42759	122	75	59	51	42	24	5001880	4983244	4947317	4886239	4742530	4073837	87	375939	4991802	50.73	185513	79851	10	19	0		122	5001880	50.74076	4964		4709	99.96	0.45	TRUE
562.45394	1	1	1	1	1	1	5038603	5038603	5038603	5038603	5038603	5038603	1	5038603	5038603	50.76	5038603	5038603	1	1	12.05		1	5038603	50.764866	5150	4914	4707	99.96	0.45	TRUE
562.45395	3	3	2	2	2	1	5087428	5087428	5083207	5083207	5083207	5052397	3	5052397	5087428	50.74	5052397	5052397	1	1	15.9		3	5087428	50.744022	5243	5012	4799	99.96	0.45	TRUE
562.45396	6	6	5	2	1	1	5094768	5094768	5090789	5071866	5058724	5058724	6	5058724	5094768	50.76	5058724	5058724	1	1	9.32		6	5094768	50.76092	5178	4962	4806	99.96	0.71	TRUE
562.45397	5	5	3	2	1	1	4848972	4848972	4841514	4836328	4824995	4824995	5	4824995	4848972	50.64	4824995	4824995	1	1	6		5	4848972	50.6427	4986	4748	4581	99.96	0.08	TRUE
562.45398	1	1	1	1	1	1	5110451	5110451	5110451	5110451	5110451	5110451	1	5110451	5110451	50.63	5110451	5110451	1	1	13.38		1	5110451	50.631485	5318	5072	4870	99.96	0.62	TRUE
562.45399	4	4	3	3	3	2	4960880	4960880	4956314	4956314	4956314	4914683	4	4818513	4960880	50.52	4818513	4818513	1	1	10.2		4	4960880	50.518612	5091	4846	4691	99.96	0.13	TRUE
562.454	14	14	8	4	3	2	5010100	5010100	4986688	4954437	4943742	4897547	14	4807613	5010100	50.82	4807613	4807613	1	1	14.31		14	5010100	50.818615	5120	4902	4741	99.96	0.11	TRUE
562.45401	3	3	2	1	1	1	4848573	4848573	4844336	4838618	4838618	4838618	3	4838618	4848573	50.8	4838618	4838618	1	1	12.04		3	4848573	50.79566	4954	4715	4542	99.96	0.08	TRUE
562.45403	8	8	7	3	3	2	5030024	5030024	5025531	4991923	4991923	4963378	8	4845984	5030024	50.83	4845984	4845984	1	1	9.42		8	5030024	50.83097	5141	4915	4765	99.96	0.15	TRUE
562.45404	3	3	3	2	2	1	5161342	5161342	5161342	5155562	5155562	5122458	3	5122458	5161342	50.59	5122458	5122458	1	1	13.74		3	5161342	50.58899	5377	5155	4911	99.96	0.08	TRUE
562.45845	3	3	3	3	3	2	5330963	5330963	5330963	5330963	5330963	5282791	3	5162123	5330963	50.64	5162123	5162123	1	1	0		3	5330963	50.6359	5555	5457	4997	99.96	0.93	TRUE
562.45846	80	80	63	58	49	29	4778625	4778625	4742797	4709489	4549048	3841363	80	325943	4778625	50.68	122944	65154	13	25	0		80	4778625	50.682842	4882	4607	4526	99.96	0.08	TRUE
562.45847	98	98	78	70	49	31	4790731	4790731	4744615	4683911	4328583	3695206	98	372440	4790731	50.79	95182	53659	13	30	0		98	4790731	50.792397	4873	4643	4521	99.65	0.08	TRUE
562.45848	55	55	41	36	32	26	4807435	4807435	4776788	4738089	4658772	4427942	55	500587	4807435	50.57	180800	110777	9	17	0		55	4807435	50.566902	4739	4537	4405	99.96	0.45	TRUE
562.45849	117	117	86	73	55	36	4993329	4993329	4911494	4819151	4537524	3903089	117	202031	4993329	50.58	110111	54095	18	34	0		117	4993329	50.578983	4992	4781	4619	99.96	0.62	TRUE
562.4585	109	109	78	71	50	36	5282384	5282384	5202448	5152330	4832986	4368315	109	324092	5282384	50.42	114962	60894	13	29	0		109	5282384	50.415115	5453	5186	4987	99.96	0.31	TRUE
562.45851	60	60	50	44	36	27	4902588	4902588	4874596	4831948	4697669	4378059	60	491124	4902588	50.4	182505	85641	8	18	0		60	4902588	50.39624	4954	4748	4549	99.96	0.08	TRUE
562.45852	140	140	102	86	65	33	4692056	4692056	4599419	4475329	4149035	2947129	140	163609	4692056	50.85	69843	39719	24	47	0		140	4692056	50.851757	4841	4594	4435	99.96	0.28	TRUE
562.45853	68	68	52	48	42	29	5053341	5053341	5015246	4985504	4881973	4456814	68	409135	5053341	50.55	158767	93142	11	20	0		68	5053341	50.550182	5039	4805	4643	99.96	0.31	TRUE
562.4591	86	86	69	61	54	35	5199221	5199221	5153586	5102090	4992580	4331694	86	231911	5199221	50.65	138227	74334	15	28	0		86	5199221	50.650913	5461	5222	4982	99.96	0.08	TRUE
562.45916	88	88	56	47	34	26	5137326	5137326	5063850	5000236	4797425	4521745	88	369091	5137326	50.83	167536	124147	10	19	0		88	5137326	50.829185	5372	5139	4921	99.96	0.08	TRUE
562.45964	152	152	97	85	54	34	5781618	5781618	5669023	5584186	5074393	4343986	152	330815	5781618	50.39	114535	53309	17	34	0		152	5781618	50.38915	6290	5906	5609	99.96	0.77	TRUE
562.50222	297	297	192	137	74	34	5530686	5530686	5267291	4873655	3918370	2465396	297	149127	5530686	50.54	45135	19280	41	85	0		297	5530686	50.54315	5968	5663	5405	99.96	1.23	TRUE
562.50223	127	127	93	77	55	37	5574712	5574712	5480715	5372404	5036391	4434203	127	325403	5574712	50.65	117831	54557	16	33	0		127	5574712	50.645596	5911	5613	5321	99.96	0.69	TRUE
562.50224	272	272	160	121	74	38	5918677	5918677	5647286	5377732	4574862	3247856	272	266636	5918677	50.48	55993	27147	33	69	0		272	5918677	50.47873	6572	6144	5822	99.96	1.34	TRUE
562.50225	71	71	54	49	39	32	5496897	5496897	5459000	5420234	5246363	5014396	71	678922	5496897	50.58	171024	92259	9	20	0		71	5496897	50.583664	5767	5489	5250	99.96	1.94	TRUE
562.50226	104	104	73	64	43	32	5465369	5465369	5390327	5334235	5031256	4646957	104	599828	5465369	50.7	162124	73215	11	24	0		104	5465369	50.70033	5863	5574	5291	99.96	0.08	TRUE
562.50227	118	118	91	79	51	35	5264135	5264135	5198886	5112869	4640493	4045254	118	272747	5264135	50.8	106248	58330	17	34	0		118	5264135	50.80109	5549	5317	5019	99.96	0.08	TRUE
562.50228	89	89	63	53	39	29	5182302	5182302	5119407	5054884	4831006	4487843	89	335697	5182302	50.76	191871	101624	11	21	0		89	5182302	50.76086	5388	5156	4908	99.96	0.08	TRUE
562.50229	108	108	73	66	54	35	5224492	5224492	5144658	5090073	4906180	4228268	108	321069	5224492	50.64	117729	64197	16	30	0		108	5224492	50.64259	5445	5182	4958	99.96	0.62	TRUE
562.5023	182	182	126	104	67	38	5380813	5380813	5237459	5069688	4486928	3463187	182	154753	5380813	50.8	72971	33867	26	52	0		182	5380813	50.80197	5664	5426	5160	99.96	0.13	TRUE
562.50231	156	156	101	84	57	39	5403741	5403741	5266745	5153017	4740719	4075662	156	198955	5403741	50.76	101748	51463	19	39	0		156	5403741	50.760925	5755	5473	5239	99.96	0.08	TRUE
562.50232	141	141	95	88	63	34	5218121	5218121	5105987	5049098	4642164	3624294	141	226367	5218121	50.67	89128	40494	19	41	0		141	5218121	50.674408	5443	5170	4954	99.96	0.62	TRUE
562.50233	163	163	120	93	61	40	5057147	5057147	4946175	4731677	4244976	3521998	163	202951	5057147	50.67	72641	40828	24	47	0		163	5057147	50.673336	5282	5016	4844	99.96	0.13	TRUE
562.50234	145	145	107	85	58	32	5233880	5233880	5139847	4979502	4531044	3566481	145	222565	5233880	50.75	86481	39940	19	41	0		145	5233880	50.753475	5504	5249	5016	99.96	0.08	TRUE
562.50235	135	135	102	81	55	32	5228356	5228356	5159487	4998961	4563484	3741201	135	222496	5228356	50.74	103182	43781	18	36	0		135	5228356	50.742184	5500	5242	5015	99.96	0.08	TRUE
562.50236	152	152	105	85	61	34	5472135	5472135	5342096	5197187	4791280	3866995	152	218992	5472135	50.85	97793	40059	19	40	0		152	5472135	50.846077	5824	5547	5311	99.96	0.08	TRUE
562.50237	112	112	79	68	49	37	4977651	4977651	4915023	4840304	4538141	4076039	112	313629	4977651	50.87	99214	59658	16	31	0		112	4977651	50.869354	5112	4896	4726	99.96	0.49	TRUE
562.50238	85	85	70	64	54	31	5002776	5002776	4968280	4927617	4755940	3878608	85	335676	5002776	50.69	119683	57639	14	29	0		85	5002776	50.692314	4995	4805	4665	99.96	0.13	TRUE
562.50239	188	188	142	109	76	30	5271569	5271569	5158545	4915552	4393017	2717705	188	172537	5271569	50.94	51525	31818	29	61	0		188	5271569	50.941475	5487	5266	5008	99.96	0.77	TRUE
562.5024	100	100	62	57	44	35	5275315	5275315	5199595	5164102	4951055	4623356	100	328151	5275315	50.75	126866	83718	13	26	0		100	5275315	50.753555	5531	5286	5049	99.96	0.08	TRUE
562.50241	115	115	84	60	46	33	5130581	5130581	5047394	4864190	4652171	4246519	115	365599	5130581	50.77	125193	60543	12	26	0		115	5130581	50.768246	5358	5122	4867	99.96	0.08	TRUE
562.50242	92	92	68	53	39	29	5138007	5138007	5076288	4969184	4766875	4415011	92	407143	5138007	50.75	220670	79802	9	20	0		92	5138007	50.749813	5359	5122	4863	99.96	0.08	TRUE
562.50243	101	101	71	56	45	29	5075060	5075060	4999210	4878999	4700013	4098970	101	407457	5075060	50.64	126195	74219	12	25	0		101	5075060	50.644405	5348	5072	4834	99.96	0.39	TRUE
562.50244	86	86	64	58	36	28	5421391	5421391	5369462	5324132	5004185	4740446	86	397943	5421391	50.77	181048	120962	11	20	0		86	5421391	50.765644	5788	5523	5250	99.96	0.08	TRUE
562.50245	98	98	78	71	55	34	4905122	4905122	4852497	4801487	4531426	3789892	98	280666	4905122	50.9	96678	56761	17	32	0		98	4905122	50.902752	4969	4741	4638	100	6.9	TRUE
562.50246	134	134	102	81	55	29	5204318	5204318	5113423	4956849	4532046	3585540	134	279099	5204318	50.93	108450	38654	16	37	0		134	5204318	50.93311	5499	5264	4997	99.96	0.08	TRUE
562.50247	90	90	67	58	39	31	5268052	5268052	5205468	5141313	4830444	4561395	90	380223	5268052	50.77	151428	90275	13	24	0		90	5268052	50.768692	5564	5318	5037	99.65	0.18	TRUE
562.50248	149	149	105	91	66	37	5350752	5350752	5238283	5133396	4738818	3736269	149	240673	5350752	50.31	79861	41666	20	44	0		149	5350752	50.31265	5509	5273	5090	99.96	1.31	TRUE
562.50249	205	205	148	109	65	33	5381929	5381929	5228195	4942541	4226863	3086573	205	165891	5381929	50.76	61241	29661	27	59	0		205	5381929	50.76323	5786	5513	5260	99.96	0.28	TRUE
562.5025	119	119	82	66	57	38	5200870	5200870	5106109	4978546	4825062	4113677	119	406039	5200870	50.47	93128	57395	17	35	0		119	5200870	50.46944	5571	5258	5032	99.96	0.69	TRUE
562.50251	91	91	71	62	44	33	5406075	5406075	5356143	5295467	5018724	4660617	91	364164	5406075	50.67	146599	75282	12	24	0		91	5406075	50.67242	5740	5470	5237	99.96	0.08	TRUE
562.50252	66	66	57	50	40	28	5136543	5136543	5117097	5070915	4925342	4473624	66	611318	5136543	50.61	196713	90211	8	19	0		66	5136543	50.6098	5194	4958	4763	99.96	0.14	TRUE
562.50253	318	318	204	148	75	26	5605478	5605478	5335129	4925185	3784914	2021231	318	264196	5605478	50.69	37346	17740	45	95	0		318	5605478	50.685795	6088	5767	5445	99.96	1.31	TRUE
562.50254	170	170	116	93	62	36	5669112	5669112	5550178	5379512	4877608	3981342	170	179801	5669112	50.51	105484	40299	21	43	0		170	5669112	50.510487	6153	5814	5482	99.96	1.31	TRUE
562.50255	111	111	83	68	53	34	5576004	5576004	5504785	5387164	5136401	4436924	111	390996	5576004	50.33	135257	55540	13	30	0		111	5576004	50.3283	5947	5565	5309	99.96	1.08	TRUE
562.50256	113	113	83	73	54	36	5408799	5408799	5335405	5258066	4957521	4320207	113	338089	5408799	50.59	109670	59287	15	32	0		113	5408799	50.591564	5711	5450	5182	99.96	0.96	TRUE
562.50257	72	72	57	49	42	31	5303797	5303797	5269120	5217921	5115283	4712480	72	388623	5303797	50.44	143996	106720	12	23	0		72	5303797	50.444786	5569	5262	5070	99.96	0.69	TRUE
562.50258	120	120	87	70	51	39	5154105	5154105	5076454	4949435	4627858	4208523	120	369025	5154105	50.63	113890	59076	16	33	0		120	5154105	50.632824	5368	5141	4895	99.96	0.08	TRUE
562.50259	116	116	87	76	60	37	5235521	5235521	5169297	5095723	4834239	4001983	116	319817	5235521	50.34	93752	50853	17	36	0		116	5235521	50.338333	5409	5166	4978	99.96	0.15	TRUE
562.5026	108	108	77	65	44	33	5237398	5237398	5166171	5085593	4785553	4393697	108	362929	5237398	50.77	137070	66817	12	25	0		108	5237398	50.77145	5474	5253	4994	99.96	0.08	TRUE
562.50261	93	93	71	62	43	31	5326398	5326398	5274019	5209793	4924492	4495166	93	413707	5326398	50.78	148525	79784	12	24	0		93	5326398	50.7776	5634	5374	5099	99.96	0.08	TRUE
562.50262	98	98	68	62	45	31	5467044	5467044	5390752	5351345	5071171	4572835	98	512575	5467044	50.75	155147	81886	13	25	0		98	5467044	50.75452	5868	5570	5297	99.96	0.08	TRUE
562.50263	96	96	73	61	48	32	5201424	5201424	5146979	5060771	4826316	4231279	96	379382	5201424	50.77	126764	74235	13	27	0		96	5201424	50.769135	5428	5183	4935	99.96	0.08	TRUE
562.50264	80	80	59	53	44	31	5088409	5088409	5036682	4995000	4830980	4337519	80	287151	5088409	50.86	154841	89015	13	24	0		80	5088409	50.855267	5250	5030	4810	99.96	0.08	TRUE
562.50266	122	122	90	73	50	37	5373223	5373223	5295204	5176883	4817412	4372926	122	283114	5373223	50.74	109096	61707	15	32	0		122	5373223	50.737892	5665	5416	5140	99.96	0.08	TRUE
562.50267	228	228	159	123	76	37	5596557	5596557	5415239	5132553	4403515	3007877	228	153049	5596557	50.39	53131	28181	33	69	0		228	5596557	50.39386	6032	5698	5412	99.96	0.85	TRUE
562.50268	260	260	185	144	67	23	5539848	5539848	5351038	5048985	3829825	2172999	260	157385	5539848	50.77	44178	19454	36	82	0		260	5539848	50.771755	6043	5729	5464	99.96	0.92	TRUE
562.50269	66	66	48	43	37	27	5260619	5260619	5219707	5181887	5061755	4738247	66	638606	5260619	50.62	222656	124147	9	17	0		66	5260619	50.618874	5528	5286	5012	99.96	0.18	TRUE
562.5027	119	119	88	73	56	37	5240424	5240424	5174920	5067191	4746088	4085883	119	206154	5240424	50.73	106379	52025	18	34	0		119	5240424	50.730553	5502	5254	5023	99.96	0.08	TRUE
562.50271	115	115	79	64	48	31	5230718	5230718	5143486	5036923	4763957	4153068	115	374144	5230718	50.73	130407	63153	15	28	0		115	5230718	50.733017	5487	5238	5000	99.96	0.08	TRUE
562.50272	231	231	149	116	66	26	5178657	5178657	4980006	4739486	3909300	2485506	231	317706	5178657	50.7	46978	25359	29	65	0		231	5178657	50.69905	5440	5199	4989	99.65	0.14	TRUE
562.50273	118	118	86	72	51	38	5358794	5358794	5272823	5175991	4852636	4408619	118	301839	5358794	50.9	109247	65707	17	32	0		118	5358794	50.90358	5614	5380	5116	99.96	0.11	TRUE
562.50274	137	137	90	78	51	31	4912121	4912121	4792237	4702359	4272939	3523992	137	572570	4912121	50.82	88704	46266	16	35	0		137	4912121	50.815563	5170	4876	4682	99.96	0.39	TRUE
562.50275	90	90	63	60	41	33	5466596	5466596	5408814	5389814	5095534	4794987	90	341687	5466596	50.71	166095	101349	12	23	0		90	5466596	50.714813	5804	5527	5251	99.96	0.08	TRUE
562.50276	152	152	109	91	67	41	5648445	5648445	5539309	5409730	4996993	4068804	152	296319	5648445	50.44	80837	48504	22	45	0		152	5648445	50.436607	5996	5722	5447	99.96	0.62	TRUE
562.50277	107	107	75	61	38	30	5222582	5222582	5138468	5046719	4677146	4413391	107	359695	5222582	50.81	140042	90959	12	23	0		107	5222582	50.806458	5471	5256	4983	99.96	0.08	TRUE
562.50278	141	141	100	83	57	35	4901546	4901546	4800112	4669120	4240593	3450776	141	284426	4901546	50.82	75128	43118	20	40	0		141	4901546	50.818783	5171	4945	4702	99.96	0.08	TRUE
562.50279	123	123	82	70	52	36	5355019	5355019	5255500	5166535	4893230	4331878	123	395544	5355019	50.73	118721	67097	16	31	0		123	5355019	50.730614	5571	5287	5116	99.96	0.08	TRUE
562.5028	75	75	58	50	44	31	5255234	5255234	5211602	5152220	5060262	4597345	75	379288	5255234	50.59	150884	95019	11	22	0		75	5255234	50.586483	5375	5137	4921	99.96	0.2	TRUE
562.50281	119	119	76	65	47	34	5416045	5416045	5327598	5259467	4915707	4476057	119	326794	5416045	50.62	122215	73129	14	28	0		119	5416045	50.622955	5770	5444	5229	99.96	0.39	TRUE
562.50282	166	166	125	104	65	33	5373039	5373039	5269962	5127985	4531424	3359989	166	185644	5373039	50.88	80509	34755	23	49	0		166	5373039	50.878654	5710	5450	5155	99.96	0.13	TRUE
562.50283	145	145	106	82	58	36	5180686	5180686	5075310	4904246	4501138	3745678	145	268852	5180686	50.9	90047	41003	19	40	0		145	5180686	50.90237	5447	5227	4949	99.96	0.18	TRUE
562.50284	111	111	85	70	48	35	5166985	5166985	5105493	5009847	4613458	4173493	111	319543	5166985	50.88	118864	60778	16	30	0		111	5166985	50.884567	5397	5172	4903	99.96	0.08	TRUE
562.50285	174	174	115	89	57	39	5412575	5412575	5258880	5070425	4558169	3916048	174	334678	5412575	50.82	83698	40229	21	43	0		174	5412575	50.82189	5835	5546	5190	99.96	0.18	TRUE
562.50286	116	116	76	64	50	37	5118352	5118352	5009455	4929623	4709387	4227484	116	349755	5118352	50.65	106504	65481	15	31	0		116	5118352	50.652397	5351	5101	4861	99.96	0.93	TRUE
562.50287	69	69	53	48	42	33	4791568	4791568	4762502	4723633	4619164	4308654	69	319528	4791568	50.81	143681	84930	11	22	0		69	4791568	50.81105	4850	4636	4531	99.96	0.08	TRUE
562.50288	109	109	78	63	43	31	5271326	5271326	5193731	5089196	4781961	4352219	109	388108	5271326	50.89	140692	82702	13	25	0		109	5271326	50.8875	5571	5340	5028	99.96	0.11	TRUE
562.50289	89	89	61	53	36	27	5163741	5163741	5087617	5027976	4728206	4417270	89	359435	5163741	50.82	171839	117628	12	20	0		89	5163741	50.820557	5421	5181	4924	99.96	0.08	TRUE
562.5029	86	86	52	45	42	27	4951002	4951002	4872692	4816873	4760742	4218147	86	358715	4951002	50.61	150179	106568	11	21	0		86	4951002	50.608524	5159	4842	4741	99.96	0.17	TRUE
562.50291	60	60	48	41	34	24	5315746	5315746	5285129	5237188	5119435	4798013	60	619479	5315746	50.82	229884	130216	8	16	0		60	5315746	50.821823	5576	5322	5077	99.96	0.08	TRUE
562.50292	144	144	107	85	53	33	5199323	5199323	5105588	4945119	4449049	3818402	144	310204	5199323	50.86	88871	39939	16	35	0		144	5199323	50.864853	5425	5215	4938	99.96	0.08	TRUE
562.50293	66	66	48	39	31	24	5180755	5180755	5139550	5083534	4946601	4715881	66	715383	5180755	50.68	209480	124192	8	15	0		66	5180755	50.684486	5392	5154	4930	99.96	0.08	TRUE
562.50294	197	197	153	127	69	33	5118089	5118089	5001135	4813390	3813605	2508862	197	203535	5118089	50.73	49688	24965	35	70	0		197	5118089	50.73388	5441	5172	4964	99.6	0.81	TRUE
562.50295	82	82	55	46	29	23	5405948	5405948	5343722	5279949	5048122	4830787	82	449902	5405948	50.56	278744	138011	8	15	0		82	5405948	50.558994	5708	5438	5181	99.96	0.62	TRUE
562.50296	67	67	46	45	31	23	5307901	5307901	5264867	5257604	5036300	4728948	67	925311	5307901	50.7	227332	124147	7	15	0		67	5307901	50.703716	5586	5328	5071	99.96	0.08	TRUE
562.50297	86	86	66	56	42	28	5505496	5505496	5453909	5382099	5161731	4688491	86	342249	5505496	50.8	159190	109361	12	22	0		86	5505496	50.80407	5890	5627	5331	99.96	0.08	TRUE
562.50298	62	62	47	44	32	23	5292053	5292053	5254668	5235371	5052897	4747534	62	624598	5292053	50.89	222567	135529	8	15	0		62	5292053	50.89074	5567	5350	5039	99.96	0.11	TRUE
562.50299	101	101	85	75	57	33	5335992	5335992	5295278	5225044	4945749	4067408	101	363664	5335992	50.41	108336	57408	16	32	0		101	5335992	50.4069	5431	5169	4972	99.96	0.23	TRUE
562.503	133	133	99	75	50	32	4878206	4878206	4785109	4602284	4209731	3561531	133	376874	4878206	50.63	91729	44957	17	35	0		133	4878206	50.630787	5079	4811	4643	99.96	0.13	TRUE
562.50301	27	27	20	17	16	12	5052123	5052123	5028955	5010009	4993978	4849182	27	1152163	5052123	50.51	520412	371685	4	7	0		27	5052123	50.508865	5162	4916	4711	99.96	0.08	TRUE
562.50302	139	139	94	86	63	39	5308004	5308004	5187135	5135875	4768411	3929656	139	310625	5308004	50.72	88796	44744	20	41	0		139	5308004	50.715298	5537	5241	5056	99.81	0.28	TRUE
562.50303	125	125	80	70	46	28	5571092	5571092	5459073	5392067	4998429	4363713	125	397480	5571092	50.63	157125	72689	13	25	0		125	5571092	50.629013	5979	5679	5349	99.96	1.39	TRUE
562.50304	65	65	47	37	26	23	5214184	5214184	5178303	5114765	4967284	4872045	65	843665	5214184	50.61	222076	137109	6	14	0		65	5214184	50.61373	5458	5197	4964	99.96	0.62	TRUE
562.50305	91	91	69	61	46	29	4944727	4944727	4886235	4821880	4607686	3960729	91	348062	4944727	50.67	134272	63748	12	25	0		91	4944727	50.671432	5166	4901	4687	99.96	0.08	TRUE
562.57363	195	135	81	69	47	32	5313376	5282281	5160871	5083152	4737194	4239686	161	332587	5300662	50.38	128287	55483	13	28	0		195	5313376	50.391277	5359		5076	99.96	0.08	TRUE
562.57364	181	117	76	60	45	29	5474456	5440253	5339026	5221743	4988518	4432671	146	524823	5461256	50.39	162680	70937	12	24	0		181	5474456	50.398434	5609		5308	99.96	0.12	TRUE
562.57365	169	129	95	82	56	30	5108222	5086289	5007481	4911803	4472462	3509641	151	379110	5101412	50.67	93256	43515	16	37	0		169	5108222	50.67603	5002		4783	99.96	0.62	TRUE
562.57366	275	162	85	72	51	31	5413369	5353984	5175929	5090587	4753206	4013468	215	524583	5391198	50.46	111013	49072	13	32	0		275	5413369	50.474667	5578		5249	99.96	1.09	TRUE
562.57367	165	129	92	73	52	30	5282445	5263117	5170270	5026013	4706652	3963923	144	387749	5274584	50.51	123840	53265	13	30	0		165	5282445	50.513863	5254		4956	99.96	0.6	TRUE
562.57368	99	86	52	46	39	26	4802582	4796330	4710646	4665531	4546198	4048352	91	459674	4799502	50.71	180587	71613	9	19	0		99	4802582	50.717216	4768		4546	99.96	0.08	TRUE
562.57369	145	105	71	62	35	29	5232061	5208934	5122797	5056000	4636147	4408715	130	326583	5226079	50.68	166923	96478	13	23	0		145	5232061	50.6854	5276		5010	99.96	0.08	TRUE
562.5737	111	83	55	52	42	29	5025322	5010240	4944729	4918248	4759140	4268003	96	336757	5020013	50.74	182556	75426	11	21	0		111	5025322	50.747196	4997		4752	99.96	0.08	TRUE
562.57371	138	101	68	59	34	29	5250401	5228725	5157766	5094313	4695144	4507139	125	394177	5245263	50.61	173691	96478	12	22	0		138	5250401	50.618763	5303		5033	99.96	0.08	TRUE
562.57372	160	107	78	60	40	31	5348851	5318553	5239195	5110141	4779435	4479024	135	359937	5339055	50.48	150103	86633	12	25	0		160	5348851	50.490227	5358		5096	99.96	0.64	TRUE
562.57373	149	102	67	61	39	30	5088409	5062579	4980627	4940707	4605270	4307907	125	470072	5079029	50.46	137637	77574	12	23	0		149	5088409	50.461136	4984		4744	99.96	0.31	TRUE
562.57374	202	164	100	79	59	29	5023952	5003364	4856369	4702955	4395566	3287823	184	360026	5016926	50.72	87602	38255	18	40	0		202	5023952	50.725803	5092		4846	99.96	0.39	TRUE
562.57375	124	93	64	58	37	29	5094451	5076977	5005675	4963010	4613790	4329005	112	326583	5089866	50.75	160939	102718	13	22	0		124	5094451	50.747215	5115		4862	99.96	0.08	TRUE
562.57376	232	160	89	72	49	29	5264524	5224993	5071123	4944005	4542477	3867803	195	355277	5250801	50.45	122307	42452	13	31	0		232	5264524	50.457912	5396		5142	99.96	0.08	TRUE
562.57377	230	145	68	61	48	31	4966641	4921111	4741476	4694833	4492963	3881493	183	259135	4949114	50.64	123412	63605	14	28	0		230	4966641	50.652866	5042		4779	99.96	0.15	TRUE
562.57379	85	68	48	42	34	27	5148845	5139414	5101834	5061135	4922905	4674478	78	751584	5146308	50.46	207299	93234	7	15	0		85	5148845	50.465744	5033		4801	99.96	0.31	TRUE
562.5738	160	109	82	65	45	34	5320481	5291963	5235473	5113221	4787381	4426818	137	394178	5311849	50.6	136133	66891	14	27	0		160	5320481	50.603302	5409		5121	99.96	0.12	TRUE
562.57381	147	101	65	55	38	23	5120626	5094705	5008996	4935932	4677746	4163817	127	359509	5113003	50.55	190916	88974	10	19	0		147	5120626	50.555225	5113		4830	99.96	0.11	TRUE
562.57382	110	79	56	48	32	26	5217309	5198910	5138504	5080468	4821254	4620018	98	414770	5212734	50.47	210287	113572	9	18	0		110	5217309	50.471325	5249		4966	99.96	0.62	TRUE
562.57384	102	80	52	44	33	27	5039672	5027645	4961968	4901257	4728521	4520724	93	605504	5036325	50.47	170094	118283	10	19	0		102	5039672	50.469395	4919		4675	99.96	0.31	TRUE
562.57444	164	126	92	76	52	32	5106486	5085407	5001406	4884662	4466411	3740584	147	379104	5100087	50.67	95520	47900	16	34	0		164	5106486	50.67379	4997		4780	99.96	0.62	TRUE
562.57445	130	86	45	41	36	24	4745389	4722459	4627734	4598386	4507980	4047999	103	418096	4734746	50.79	195898	88333	9	17	0		130	4745389	50.80028	4656		4465	99.96	0.08	TRUE
562.57447	134	97	55	48	40	32	5145397	5125606	5020881	4971336	4841652	4563874	116	555546	5138954	50.51	199005	93330	9	20	0		134	5145397	50.509357	5088		4847	99.96	0.08	TRUE
562.57449	190	129	65	56	41	29	5395169	5361836	5218579	5150226	4895909	4456578	160	368541	5383916	50.67	174570	72874	11	23	0		190	5395169	50.668625	5516		5205	99.96	0.58	TRUE
562.5745	157	125	91	75	51	26	4676177	4659677	4578304	4460773	4047899	3108589	138	358347	4668948	50.69	86550	41266	16	35	0		157	4676177	50.69169	4644		4440	99.96	0.19	TRUE
562.57451	156	124	82	69	48	32	5312737	5294817	5178799	5077183	4750547	4182404	140	418201	5306709	50.54	123933	55405	13	29	0		156	5312737	50.540127	5326		5006	99.96	0.6	TRUE
562.57452	117	91	65	55	33	27	5105564	5090331	5026504	4957784	4622254	4409000	107	531706	5101533	50.71	186370	106034	10	20	0		117	5105564	50.70848	5055		4809	99.96	0.31	TRUE
562.57453	144	104	59	47	39	26	4863422	4843469	4733818	4642379	4497872	4017498	120	448512	4854543	50.64	134851	78154	10	21	0		144	4863422	50.64689	4857		4644	99.9	0.14	TRUE
562.57454	147	104	67	56	36	23	5128808	5103112	5013587	4930370	4629899	4176487	132	362675	5123075	50.55	186895	106047	10	19	0		147	5128808	50.55001	5118		4835	99.96	0.11	TRUE
562.57455	206	151	80	68	49	29	5086934	5056695	4892793	4796524	4492241	3777440	177	264882	5076156	50.5	113301	47412	14	30	0		206	5086934	50.507103	5219		4946	99.96	0.18	TRUE
562.57456	159	125	83	73	51	37	4812632	4795966	4692355	4619806	4247941	3754895	138	269167	4805031	50.66	95048	51624	17	35	0		159	4812632	50.656044	4767		4565	99.96	0.14	TRUE
562.57457	212	123	67	52	35	22	5170267	5119406	4996517	4885688	4640681	4182250	172	362675	5154830	50.54	190918	109239	10	18	0		212	5170267	50.5453	5229		4938	99.96	0.11	TRUE
562.57458	104	75	53	51	42	27	4930941	4914946	4868413	4850436	4707184	4169630	88	445805	4924860	50.51	173743	86548	10	21	0		104	4930941	50.508472	4857		4631	99.96	0.08	TRUE
562.57459	150	103	60	49	41	29	4860820	4837871	4736506	4653359	4508831	4065045	121	430810	4850158	50.64	132617	72495	11	23	0		150	4860820	50.64586	4856		4643	99.9	0.14	TRUE
562.5746	102	72	47	40	31	23	5109758	5094402	5037526	4990119	4832393	4571686	82	425393	5102107	50.44	301815	107290	7	14	0		102	5109758	50.446224	5061		4791	99.96	0.14	TRUE
562.57462	103	76	52	46	39	29	5068782	5055188	5005654	4965033	4844600	4501273	89	555548	5063729	50.49	183941	98818	9	19	0		103	5068782	50.49343	4951		4738	99.96	0.08	TRUE
562.57464	139	97	63	53	41	28	5354962	5333784	5248443	5172096	4993078	4523951	117	441800	5346778	50.43	196539	72637	10	21	0		139	5354962	50.43352	5379		5110	99.96	0.91	TRUE
562.57465	147	103	71	63	48	30	5005396	4979461	4904548	4840076	4611510	3940293	128	357705	4998357	50.52	115299	63600	12	27	0		147	5005396	50.520897	5016		4769	99.96	0.08	TRUE
562.57466	212	125	63	50	37	24	5250525	5201010	5058955	4961819	4755219	4306567	172	448482	5235233	50.53	174809	101118	9	19	0		212	5250525	50.534737	5447		5150	99.96	0.62	TRUE
562.57467	193	156	104	93	63	33	5313434	5293945	5160113	5077165	4582538	3476182	173	260610	5305952	50.46	80064	41819	20	45	0		193	5313434	50.45976	5412		5148	99.96	0.49	TRUE
562.57468	231	172	109	82	50	30	5134078	5097061	4940725	4735128	4260125	3599483	210	468170	5126205	50.52	93250	33884	16	36	0		231	5134078	50.523384	5170		4914	99.96	0.33	TRUE
562.57469	168	113	71	61	47	32	5326182	5295748	5194595	5119002	4906750	4393305	144	445045	5316804	50.77	137127	63014	12	25	0		168	5326182	50.77031	5320		5064	99.96	0.13	TRUE
562.5747	162	125	88	76	53	34	5226350	5205991	5114647	5016720	4598535	3928048	145	450305	5219860	50.69	90096	50093	15	34	0		162	5226350	50.695267	5175		4928	99.96	0.62	TRUE
562.57472	187	134	72	63	46	34	5267470	5237910	5079834	5026268	4732521	4321451	164	324698	5259353	50.25	121732	73568	14	28	0		187	5267470	50.25513	5271		5040	99.96	0.14	TRUE
562.57473	128	94	67	56	32	27	5096004	5078394	5009840	4933589	4565563	4404577	110	630489	5089225	50.74	169107	102534	10	20	0		128	5096004	50.742443	5075		4814	99.96	0.08	TRUE
562.57474	111	82	57	48	38	30	5108085	5092883	5036509	4971345	4804935	4505686	98	348565	5103078	50.81	164943	106034	12	21	0		111	5108085	50.80644	5098		4858	99.96	0.08	TRUE
562.57475	142	104	73	63	36	29	5253318	5230885	5169523	5097815	4650053	4398892	129	392530	5248284	50.61	159218	96500	13	23	0		142	5253318	50.61213	5300		5034	99.96	0.08	TRUE
562.57476	80	66	45	40	31	24	4959752	4952227	4909023	4873410	4714747	4481003	74	716954	4957668	50.53	209014	95429	7	14	0		80	4959752	50.535248	4776		4573	99.96	0.31	TRUE
562.57477	184	120	72	62	46	31	5300159	5266214	5154888	5078674	4818332	4280477	152	445045	5287856	50.77	137182	66654	13	26	0		184	5300159	50.77445	5311		5059	99.96	0.13	TRUE
562.57478	145	96	56	43	35	28	5278832	5250398	5159498	5071871	4958682	4716636	123	317526	5270477	50.61	178143	113941	11	20	0		145	5278832	50.611706	5242		4985	99.96	0.68	TRUE
562.57479	165	129	86	72	51	30	5195443	5176056	5059829	4956149	4626096	3917715	146	422334	5188376	50.59	123988	52327	13	30	0		165	5195443	50.58793	5160		4859	99.96	0.54	TRUE
562.5748	158	125	89	76	53	34	5230255	5211771	5123502	5022744	4628696	3946796	143	450190	5224449	50.68	90096	50093	15	34	0		158	5230255	50.682175	5170		4923	99.96	0.62	TRUE
562.57481	142	105	73	63	39	31	5253362	5231214	5160871	5089150	4702758	4423638	130	394177	5248585	50.61	147223	85607	13	25	0		142	5253362	50.611664	5306		5031	99.96	0.08	TRUE
562.57482	222	141	81	68	47	29	5399897	5356730	5214495	5126072	4790114	4136189	179	531745	5384028	50.35	151215	52403	12	28	0		222	5399897	50.356663	5517		5179	99.96	1.03	TRUE
562.57483	194	130	95	82	57	37	5278125	5243646	5159807	5075789	4656431	3894938	159	286264	5264784	50.52	88347	45816	18	39	0		194	5278125	50.524097	5254		5000	99.96	0.31	TRUE
562.57484	159	118	85	76	55	32	5122762	5100742	5017893	4951342	4582946	3755719	139	325932	5115162	50.68	101627	47900	16	34	0		159	5122762	50.684105	5006		4783	99.96	0.62	TRUE
562.57485	145	105	70	60	37	30	5256021	5232958	5152402	5080802	4711469	4466399	131	394177	5250698	50.61	165297	96478	12	23	0		145	5256021	50.611557	5311		5040	99.96	0.08	TRUE
562.57486	204	142	90	78	51	30	5224032	5191058	5071336	4989109	4572373	3837817	172	415247	5212182	50.58	104351	44012	14	32	0		204	5224032	50.578594	5193		4914	99.96	0.54	TRUE
562.57487	149	114	65	55	49	27	4885580	4865187	4751918	4670510	4560519	3715858	136	346173	4880668	50.62	115324	59378	12	27	0		149	4885580	50.624203	4886		4654	99.96	0.08	TRUE
562.57488	152	131	92	75	57	28	4834959	4824292	4739421	4608909	4310679	3214896	139	337765	4829868	50.45	82112	42593	16	37	0		152	4834959	50.459663	4834		4592	99.65	0.08	TRUE
562.57489	99	76	58	49	32	26	5023682	5011538	4975241	4910302	4602202	4368624	89	532121	5020135	50.75	160750	109329	10	19	0		99	5023682	50.747	4964		4728	99.34	0.08	TRUE
562.5749	85	64	45	42	39	28	4927446	4916714	4879287	4856451	4816368	4451384	71	491200	4922119	50.54	174793	91869	8	18	0		85	4927446	50.54089	4811		4580	99.96	0.08	TRUE
562.57491	163	128	92	80	57	34	5152909	5134110	5037679	4952107	4559183	3731618	147	272596	5146673	50.67	91288	48331	17	37	0		163	5152909	50.67747	5085		4844	99.96	0.62	TRUE
562.57492	145	105	72	63	35	29	5200424	5177508	5103925	5042545	4615799	4388376	129	315971	5194057	50.69	166923	102718	13	23	0		145	5200424	50.692	5239		4984	99.96	0.08	TRUE
562.57493	137	99	67	54	36	29	5206600	5184757	5113004	5018138	4710156	4443503	124	393326	5201695	50.69	163095	96584	12	23	0		137	5206600	50.69039	5244		4975	99.96	0.08	TRUE
562.57494	161	109	81	64	44	32	5302156	5273496	5213745	5095272	4772077	4363093	137	389625	5293346	50.6	137587	66891	13	26	0		161	5302156	50.60302	5386		5107	99.65	0.12	TRUE
562.57495	113	90	61	54	42	26	4854303	4841178	4777606	4734060	4521827	3894736	102	327143	4850117	50.51	132792	79705	11	22	0		113	4854303	50.510937	4780		4565	99.96	0.19	TRUE
562.57496	90	77	52	47	41	28	4803518	4796591	4741247	4706535	4597820	4126811	84	480152	4801277	50.76	147484	88449	10	20	0		90	4803518	50.76369	4707		4480	99.96	0.45	TRUE
562.57497	88	73	57	50	32	27	4841887	4834309	4794072	4745129	4446841	4277840	81	466125	4839346	50.8	173639	106504	10	18	0		88	4841887	50.796993	4770		4544	99.96	0.08	TRUE
562.57498	157	112	82	68	41	30	5219978	5193272	5129175	5032642	4625619	4249548	140	394178	5213473	50.61	136133	82747	13	25	0		157	5219978	50.61282	5274		5010	99.65	0.12	TRUE
562.57499	163	103	54	51	41	33	5155675	5125121	5014464	4997308	4834625	4570524	129	555548	5143279	50.46	133298	77308	10	22	0		163	5155675	50.466137	5125		4905	99.96	0.08	TRUE
562.575	125	93	64	58	37	29	5096143	5078440	5008084	4963605	4612903	4327797	111	326583	5090847	50.75	160939	102718	13	22	0		125	5096143	50.747692	5138		4883	99.96	0.08	TRUE
562.57501	101	80	51	45	40	31	4937757	4927469	4853404	4813512	4719454	4396138	89	395626	4933602	50.8	176807	90508	11	21	0		101	4937757	50.800354	4855		4663	99.96	0.08	TRUE
562.57502	88	71	48	45	36	26	4926790	4917091	4853897	4831004	4689855	4318844	81	386153	4923944	50.65	180950	109239	10	19	0		88	4926790	50.654484	4850		4615	99.96	0.14	TRUE
562.57503	140	95	64	56	37	23	5110499	5084386	5012335	4958170	4684534	4193476	121	350111	5103483	50.58	186332	106047	10	19	0		140	5110499	50.582264	5096		4827	99.96	0.08	TRUE
562.57504	137	112	80	69	49	26	5145822	5131273	5050607	4968841	4650805	3869221	126	470825	5141921	50.61	124984	55405	11	26	0		137	5145822	50.614635	5075		4797	99.96	0.6	TRUE
562.57505	130	97	70	58	37	31	5150608	5134108	5067741	4980914	4664587	4471606	112	396939	5143906	50.74	159218	88436	12	23	0		130	5150608	50.738922	5154		4880	99.96	0.08	TRUE
562.57506	194	129	75	62	45	32	5094150	5057048	4941506	4837188	4541606	4070133	163	263936	5082064	50.67	126480	60966	15	28	0		194	5094150	50.681152	5181		4914	99.96	0.39	TRUE
562.57507	143	100	54	45	32	25	5087531	5063470	4959160	4892513	4693815	4458692	123	605504	5079901	50.44	178143	119799	9	18	0		143	5087531	50.443897	5011		4766	99.96	0.36	TRUE
562.57508	142	102	69	62	36	29	5227375	5205141	5136573	5089615	4675134	4419726	124	326582	5220344	50.69	166923	102718	13	23	0		142	5227375	50.686665	5252		4999	99.96	0.08	TRUE
562.57509	177	144	88	68	52	34	5065472	5048597	4910403	4766832	4509103	3825405	160	360026	5058976	50.71	88733	51417	16	34	0		177	5065472	50.71486	5125		4864	99.96	0.44	TRUE
562.5751	159	136	84	69	57	31	4910360	4896855	4774914	4667997	4459031	3495759	151	244998	4907341	50.76	99023	47860	17	35	0		159	4910360	50.761677	4894		4670	99.96	0.45	TRUE
562.58622	465	360	194	134	67	25	5279428	5221705	4829850	4399503	3364198	1922557	415	168711	5260192	50.95	34955	15137	42	97	0		465	5279428	50.942963	5461		5210	99.96	1.17	TRUE
562.58623	261	184	116	91	59	34	5224510	5184354	5023803	4830540	4324894	3449091	216	202573	5207300	50.75	86437	34850	22	46	0		261	5224510	50.761257	5257		5021	99.04	0.17	TRUE
562.58624	509	398	234	147	55	12	5010749	4947831	4522535	3890563	2465922	965280	456	181051	4990645	51.38	23199	11146	57	134	1.56		509	5010749	51.39072	5020		4851	99.65	0.62	TRUE
562.58625	246	174	102	78	48	28	5276673	5241020	5073464	4903745	4424155	3667177	201	345128	5259852	50.48	103733	43061	16	35	0		246	5276673	50.489258	5336		5068	99.96	0.12	TRUE
562.58626	270	204	141	112	53	22	4090023	4054538	3907450	3688502	2682938	1651246	236	144593	4077273	51.22	38076	19466	32	71	0		270	4090023	51.228683	4106		3937	82.93	0.25	TRUE
562.58627	179	129	76	62	35	27	5172565	5145015	5018477	4917505	4507192	4227082	154	396070	5162774	50.84	159218	108979	12	22	0.06		179	5172565	50.843296	5220		4962	99.96	0.08	TRUE
562.58628	97	81	57	52	42	22	4660484	4651329	4599986	4566323	4391609	3663108	91	401730	4658423	50.91	167100	76441	10	19	0		97	4660484	50.909584	4541		4361	99.96	0.39	TRUE
562.58629	288	244	158	115	64	28	5016338	4992740	4789961	4478000	3577743	2335220	266	201509	5008189	51.02	43865	23052	32	72	0		288	5016338	51.027065	4962		4753	97.74	0.35	TRUE
562.5863	237	184	124	98	57	26	4734848	4705736	4563697	4382292	3760807	2681439	210	203230	4724324	51.11	63520	28985	21	49	0		237	4734848	51.117226	4690		4483	98.11	0.08	TRUE
562.58631	258	201	131	102	60	33	5121810	5091312	4889286	4679295	4035421	3090178	236	170469	5113469	51.1	62006	30460	24	53	0		258	5121810	51.10123	5232		5000	98.42	0.08	TRUE
562.58632	307	212	148	110	61	32	4862019	4807883	4643140	4378011	3638380	2601569	265	140931	4845666	51.11	53965	25161	29	61	0		307	4862019	51.10311	4934		4733	94.11	0.46	TRUE
562.58633	209	150	98	82	54	32	5008175	4978512	4843844	4734243	4271708	3484499	171	190882	4993742	51.02	97722	41247	18	38	0		209	5008175	51.025314	5067		4845	99.04	0.08	TRUE
562.58634	282	254	173	128	61	24	4808865	4794511	4585439	4259079	3145774	1826038	266	124418	4802268	51.34	38695	17406	38	82	0		282	4808865	51.343445	4774		4607	98.73	0.28	TRUE
562.58635	253	191	137	103	53	28	5012619	4978432	4845117	4591756	3824319	2904463	227	227828	5002753	51.06	65335	26684	21	51	0		253	5012619	51.052036	5094		4866	97.96	0.37	TRUE
562.58636	303	223	131	104	58	30	4714538	4667291	4449048	4252194	3446676	2492468	270	142951	4701842	51.18	58524	23534	28	62	0.02		303	4714538	51.18178	4805		4582	96.72	0.08	TRUE
562.5864	134	115	85	69	56	31	5031956	5020658	4940643	4824365	4621681	3658401	127	189222	5029365	50.9	108455	47986	17	34	0.02		134	5031956	50.907173	4938		4720	99.96	0.08	TRUE
562.58641	315	232	160	111	55	31	5096355	5051244	4883225	4529722	3618662	2744345	274	190918	5080489	50.9	60309	21769	28	64	0		315	5096355	50.899437	5171		4940	99.96	0.12	TRUE
562.58642	348	258	168	114	66	29	5063542	5012518	4809428	4428795	3656415	2368287	308	162280	5048013	50.93	42723	22718	33	72	0.02		348	5063542	50.93333	5127		4914	99.19	0.08	TRUE
562.58643	296	255	180	124	62	22	4760411	4735115	4558729	4153557	3203150	1831574	281	172957	4754508	51.29	37946	17530	35	80	0.02		296	4760411	51.291737	4662		4498	99.96	0.43	TRUE
562.58644	451	343	214	139	62	15	4999867	4941678	4626585	4065648	2834316	1200850	395	145209	4978598	51.28	29610	13661	50	112	0		451	4999867	51.291763	5085		4895	99.96	0.08	TRUE
562.58645	622	473	137	86	54	32	5980243	5878487	5111868	4762174	4247018	3480434	589	235763	5967311	48.59	71752	17397	24	65	0.03		622	5980243	48.588543	5978		5748	100	32.05	TRUE
562.58646	189	142	83	66	48	28	5036288	5009984	4872777	4747153	4463073	3725029	167	341914	5027937	50.73	108538	48378	13	29	0.72		189	5036288	50.735466	5058		4839	99.96	0.62	TRUE
562.58647	146	113	68	53	38	24	4870252	4852909	4733048	4620303	4385382	3922517	131	433923	4864809	50.67	179085	97362	10	21	0.56		146	4870252	50.66349	4731		4524	99.96	0.08	TRUE
562.58648	259	192	117	87	57	29	4764440	4728202	4570868	4344731	3859742	2950711	223	199534	4750746	50.97	81209	30062	20	47	1.92		259	4764440	50.975494	4820		4628	98.62	0.18	TRUE
562.58649	239	165	105	79	49	32	5231074	5193125	5041557	4861187	4392683	3826034	200	319265	5216778	50.78	109221	42483	17	34	0.98		239	5231074	50.788467	5331		5076	99.96	0.58	TRUE
562.5865	265	226	154	115	61	22	4623776	4600214	4414631	4125830	3263939	1910978	253	173840	4619245	51.32	40252	21544	31	70	1.49		265	4623776	51.32387	4572		4383	99.96	0.08	TRUE
562.58651	189	157	108	89	59	31	4880607	4863050	4730355	4583376	4089887	3133783	174	237195	4875169	50.93	80768	33957	20	45	0.12		189	4880607	50.933807	4826		4624	99.96	0.62	TRUE
562.58741	133	91	54	47	40	29	4963640	4938904	4862188	4815276	4706442	4340677	118	411998	4957733	50.88	166668	77456	10	20	0		133	4963640	50.880844	5007		4787	99.96	0.08	TRUE
562.58742	155	116	76	60	46	31	4959023	4937079	4835353	4723421	4483889	3938498	142	371335	4953644	50.72	124418	54837	13	27	0		155	4959023	50.719467	4993		4768	99.86	0.27	TRUE
562.58743	200	145	92	74	52	35	5308406	5273655	5160509	5045415	4689863	4034813	186	320221	5302850	50.69	89056	50346	16	34	0		200	5308406	50.69192	5420		5151	99.96	0.08	TRUE
562.58745	231	154	93	70	49	33	5282140	5240326	5111111	4954989	4624953	4050502	187	320121	5264619	50.67	103561	54036	15	32	0		231	5282140	50.68073	5412		5141	99.96	0.08	TRUE
562.58748	156	137	91	74	57	32	5117742	5105630	4998323	4881056	4584850	3690003	152	236300	5116062	50.46	112275	46970	17	36	0		156	5117742	50.457195	5147		4888	99.96	0.36	TRUE
562.58749	209	176	123	102	63	30	4774493	4756706	4618992	4474153	3829407	2662483	191	260878	4767673	50.8	59493	29737	26	54	0		209	4774493	50.798607	4849		4629	99.65	0.09	TRUE
562.58751	297	178	108	85	60	32	5488933	5429117	5278337	5127571	4728614	3695347	226	287778	5461051	50.69	91445	42362	18	41	0		297	5488933	50.69448	5571		5288	99.96	0.15	TRUE
562.58752	128	85	57	54	44	29	4930384	4910057	4857770	4837526	4668397	4160952	97	419305	4918771	50.75	157426	76468	11	22	0		128	4930384	50.761463	4912		4703	99.96	0.08	TRUE
562.58753	214	159	100	75	46	29	4420089	4385635	4235096	4058322	3582395	3001492	198	238981	4413514	50.85	81719	34309	18	37	0		214	4420089	50.854767	4473		4231	82.41	0.23	TRUE
562.58754	181	120	75	66	50	30	5182576	5151518	5041303	4981023	4694566	3986394	143	422844	5167386	50.73	124510	59487	12	28	0		181	5182576	50.735695	5179		4930	99.96	0.13	TRUE
562.58755	195	143	108	88	61	34	4988687	4960886	4876679	4742035	4302828	3282057	170	299519	4979029	50.71	67489	41057	21	45	0		195	4988687	50.71226	5072		4819	99.96	0.39	TRUE
562.58757	135	90	64	53	41	28	4863845	4840968	4780857	4706478	4506493	4047197	109	288080	4854099	50.82	151655	82286	12	23	0		135	4863845	50.8311	4789		4587	99.96	0.08	TRUE
562.58758	353	241	141	114	65	32	5167387	5103236	4885755	4693513	3807214	2631260	304	203801	5147727	50.74	51333	24348	31	68	0		353	5167387	50.751434	5486		5208	99.96	0.21	TRUE
562.58759	113	78	61	52	38	30	4720765	4699661	4663353	4600051	4362989	4079569	99	360582	4715136	50.89	126528	79423	11	23	0		113	4720765	50.892662	4585		4370	95.33	0.4	TRUE
562.5876	120	81	49	44	35	24	4946001	4924632	4854739	4826429	4676787	4258277	99	512407	4937601	50.76	184664	94145	9	18	0		120	4946001	50.762867	4952		4712	99.96	0.08	TRUE
562.58761	95	72	48	39	28	22	5273646	5259323	5208160	5148331	4979082	4770872	90	710255	5271452	50.75	198453	119871	7	15	0		95	5273646	50.745274	5313		5057	99.96	0.58	TRUE
562.58762	129	96	56	51	44	31	5012259	4996190	4907129	4867748	4759465	4237649	108	498579	5004451	50.8	147112	70589	11	23	0		129	5012259	50.80747	5002		4766	100	0.08	TRUE
562.58763	245	147	82	64	48	30	5176663	5121252	4983910	4844447	4593101	3898743	198	406316	5158675	50.72	111773	51792	13	30	0		245	5176663	50.730656	5253		4976	99.96	1.17	TRUE
562.58765	101	82	63	57	42	27	4971033	4959502	4916168	4869069	4608085	4046712	95	308793	4968578	50.63	163452	87758	11	23	0		101	4971033	50.6266	4917		4684	99.96	0.12	TRUE
562.58766	161	120	76	62	47	30	5103330	5080989	4983910	4879141	4632132	3986284	141	406760	5095532	50.75	118913	53703	12	27	0		161	5103330	50.75541	5108		4838	99.96	1.17	TRUE
562.58767	105	81	53	47	42	29	4968991	4954804	4880508	4833905	4741090	4259620	95	495173	4965074	50.58	148633	89298	12	22	0		105	4968991	50.582684	4929		4709	99.96	0.08	TRUE
562.58768	103	82	57	45	32	24	4391053	4377407	4318718	4224659	4013040	3724760	100	356059	4389821	50.82	165035	91128	9	19	0		103	4391053	50.82061	4285		4080	89.16	0.08	TRUE
562.60286	1	1	1	1	1	1	4937450	4937450	4937450	4937450	4937450	4937450	1	4937450	4937450	50.71	4937450	4937450	1	1	4.66		1	4937450	50.705578	5028	4577	4724	98.39	4.05	TRUE
562.64824	123	75	44	33	26	20	5122706	5094189	5031617	4959292	4840375	4641506	101	666007	5114575	50.45	358571	132668	5	12	0		123	5122706	50.438656	5078		4810	99.88	0.08	TRUE
562.64825	85	55	33	30	24	20	4951613	4933234	4878270	4857793	4766677	4615210	77	589160	4948273	50.51	256907	195190	7	12	0		85	4951613	50.520428	4884		4656	99.96	0.15	TRUE
562.64826	170	142	104	83	54	32	4860714	4842430	4742423	4590048	4131110	3349251	162	330969	4857578	50.85	86707	40767	18	39	0		170	4860714	50.845676	4818		4614	99.88	0.58	TRUE
562.64827	170	112	79	70	51	32	5307228	5273730	5197210	5138189	4839734	4166469	141	432922	5295741	50.67	118081	56443	14	29	0		170	5307228	50.67832	5331		5085	99.96	0.13	TRUE
562.64828	92	68	41	37	27	23	5009156	4995047	4933737	4905531	4736908	4594500	84	441381	5005808	50.76	209196	134028	8	15	0		92	5009156	50.761166	4969		4742	99.96	0.08	TRUE
562.64829	49	38	24	24	21	18	4966531	4960127	4928990	4928990	4884640	4786831	44	956525	4964411	50.71	319583	276424	5	9	0		49	4966531	50.706944	4892		4674	99.96	0.08	TRUE
562.6483	97	62	38	32	27	20	5062081	5042741	4995805	4955894	4870158	4648685	81	595227	5055978	50.53	305048	167075	7	12	0		97	5062081	50.53082	5014		4768	99.96	0.08	TRUE
562.64831	101	74	51	44	38	26	4871782	4857733	4807825	4756321	4657007	4198938	85	444187	4865571	50.58	173559	94778	9	19	0		101	4871782	50.587833	4856		4630	99.96	0.14	TRUE
562.64832	103	66	42	33	27	22	5160750	5139855	5084379	5019867	4933362	4746565	86	650784	5153893	50.43	221809	172093	8	14	0		103	5160750	50.43298	5193		4919	99.96	0.62	TRUE
562.64833	233	162	116	91	64	36	5203982	5159411	5038803	4870674	4443616	3418384	206	217010	5192772	50.55	72477	39066	22	47	0		233	5203982	50.556362	5327		5065	99.34	0.36	TRUE
562.64834	88	67	44	39	27	19	5068192	5056370	5004083	4972640	4788979	4512084	79	836126	5064754	50.67	281684	140045	6	12	0		88	5068192	50.665977	5092		4842	99.96	0.62	TRUE
562.64835	96	76	50	45	36	25	4719358	4707209	4650422	4613680	4457323	4066353	89	434115	4716599	50.66	175453	96044	9	18	0		96	4719358	50.659622	4655		4452	99.96	0.49	TRUE
562.64836	147	93	59	46	38	29	5126687	5094586	5028748	4939823	4807642	4507104	130	501839	5120363	50.56	166193	98223	10	20	0		147	5126687	50.566437	5136		4885	99.96	0.13	TRUE
562.64837	159	84	51	41	28	21	5081625	5040380	4963484	4890983	4679308	4455533	124	577227	5068479	50.42	213893	132552	8	15	0		159	5081625	50.4147	5028		4768	99.96	0.08	TRUE
562.64838	88	62	33	26	22	19	5066485	5051628	4991150	4938894	4878074	4780865	81	860065	5063547	50.34	366154	168663	5	10	0		88	5066485	50.33843	5035		4781	99.96	0.08	TRUE
562.64839	58	42	28	25	22	17	5167261	5158066	5118944	5092847	5052684	4890283	50	1158280	5164258	50.63	374902	215623	5	9	0		58	5167261	50.638203	5079		4848	99.96	0.08	TRUE
562.6484	109	77	50	40	32	24	4828385	4810855	4748910	4679313	4561033	4263728	96	738325	4823525	50.52	185979	113001	8	17	0		109	4828385	50.519894	4747		4512	99.65	0.08	TRUE
562.64841	184	152	116	91	61	33	4755326	4734957	4645783	4475287	3984402	2985140	177	177201	4752445	50.76	72248	36191	23	48	0		184	4755326	50.759315	4855		4626	99.65	0.39	TRUE
562.64842	105	62	44	41	34	23	4821934	4798301	4763972	4743266	4632854	4228805	82	439739	4813061	50.63	192184	111862	9	17	0		105	4821934	50.638145	4758		4554	99.88	0.39	TRUE
562.64843	87	51	31	29	25	20	5156587	5135754	5093060	5079662	5020044	4828723	71	832097	5150422	50.53	464755	177814	4	9	0		87	5156587	50.533543	5145		4887	99.96	0.08	TRUE
562.64844	210	146	109	86	62	35	5268660	5229578	5145123	4988955	4584956	3594538	187	216320	5259070	50.43	93262	40649	21	43	0		210	5268660	50.426258	5405		5141	99.96	0.08	TRUE
562.64845	146	92	60	55	40	27	5193010	5163826	5100786	5063671	4834197	4362157	118	713595	5182056	50.57	145497	91929	9	21	0		146	5193010	50.569862	5298		5043	99.96	0.08	TRUE
562.64846	86	67	40	36	25	18	5050286	5038639	4982398	4950177	4761210	4519066	81	1044457	5048464	50.43	332463	132250	5	10	0		86	5050286	50.427162	4961		4696	99.96	0.08	TRUE
562.64847	105	78	46	40	26	22	5217163	5200311	5125198	5079911	4857103	4710380	98	578754	5214341	50.74	276426	135005	7	15	0		105	5217163	50.738014	5254		4995	99.96	0.39	TRUE
562.64848	69	46	28	24	22	19	5084673	5070275	5035685	5005134	4973531	4876189	60	570452	5081460	50.46	377028	208390	6	10	0		69	5084673	50.460926	5011		4770	99.96	0.08	TRUE
562.64849	231	128	75	67	49	32	5237363	5180212	5065228	5020072	4737065	4107308	179	338218	5218104	50.69	128449	53424	13	29	0		231	5237363	50.708286	5309		5051	99.96	0.18	TRUE
562.6485	173	118	71	67	45	31	4909566	4880896	4773204	4746335	4417792	3880053	143	282234	4897967	50.73	118819	54946	14	28	0		173	4909566	50.745586	4939		4704	99.96	0.08	TRUE
562.64851	161	100	68	63	45	30	5228306	5195144	5116764	5078396	4791671	4270236	129	326322	5216214	50.75	152404	73361	12	25	0		161	5228306	50.76319	5333		5071	98.73	0.08	TRUE
562.64852	123	84	58	54	37	28	5276363	5255356	5197615	5166287	4915689	4607873	102	498426	5267760	50.68	173578	99180	10	20	0		123	5276363	50.67665	5365		5088	99.88	0.08	TRUE
562.64853	135	89	60	50	39	27	5349836	5323798	5268775	5197106	5001430	4527029	112	627978	5340479	50.55	142748	91355	9	20	0		135	5349836	50.558334	5470		5132	99.76	0.39	TRUE
562.64854	114	71	40	37	26	21	5043818	5020237	4952959	4929841	4748011	4577232	96	665537	5036871	50.4	326242	119570	5	12	0		114	5043818	50.39938	4959		4720	99.96	0.08	TRUE
562.64855	112	94	75	65	50	30	5310259	5298747	5264237	5191327	4953021	4187266	106	415505	5308126	50.62	112487	56306	11	26	0		112	5310259	50.616196	5305		5051	99.96	0.21	TRUE
562.64856	53	43	31	30	28	25	4775593	4769514	4742220	4737074	4708459	4604040	49	395921	4774126	50.68	294336	131012	8	13	0		53	4775593	50.680283	4585		4404	99.96	0.11	TRUE
562.64857	83	61	45	41	31	24	5082100	5070721	5038467	5008435	4853923	4635508	70	840512	5077142	50.51	232786	112930	7	15	0		83	5082100	50.509315	5127		4868	99.96	0.62	TRUE
562.64858	79	48	36	31	26	18	5129730	5111808	5090105	5057028	4975370	4703760	63	734293	5123241	50.68	330077	191491	5	11	0		79	5129730	50.67947	5153		4909	99.96	0.69	TRUE
562.64859	109	72	49	42	29	19	5008433	4985667	4940360	4884683	4696552	4373229	94	575285	5002253	50.54	254768	173847	7	12	0		109	5008433	50.5408	5030		4777	99.96	0.08	TRUE
562.6486	50	38	25	22	20	15	4705039	4698155	4666959	4642499	4614902	4435539	44	662709	4702757	50.64	596832	169163	4	8	0		50	4705039	50.636436	4591		4414	99.86	0.08	TRUE
562.64861	124	83	51	48	36	28	5210398	5187685	5117251	5094240	4914078	4634255	105	405415	5203059	50.64	213356	104012	9	18	0		124	5210398	50.64803	5255		4988	99.96	0.31	TRUE
562.64862	165	94	47	40	28	22	5229881	5190294	5097706	5047148	4824821	4599718	136	621439	5219162	50.56	259727	113013	7	15	0		165	5229881	50.56226	5277		5000	99.96	0.08	TRUE
562.64863	94	69	41	35	32	26	5097042	5082111	5028978	4986996	4954728	4752167	84	371582	5092797	50.69	251210	124185	8	15	0		94	5097042	50.688046	5081		4838	99.96	0.08	TRUE
562.64864	221	167	118	102	61	30	5100938	5066839	4945712	4836067	4148196	2968142	206	281669	5095600	50.64	58078	35021	23	51	0		221	5100938	50.646294	5176		4935	99.65	0.67	TRUE
562.64865	143	84	47	40	29	20	5248538	5214991	5131185	5081034	4904748	4567441	111	419896	5235481	50.67	266374	147311	8	15	0		143	5248538	50.67457	5320		5041	99.96	0.08	TRUE
562.64866	111	58	38	31	28	22	5206872	5178222	5129095	5079792	5043975	4831011	84	607707	5196982	50.62	294533	133191	6	12	0		111	5206872	50.622177	5305		5016	99.96	0.62	TRUE
562.64867	157	88	61	52	44	28	5166649	5125359	5059551	4990528	4857117	4261982	131	394067	5156876	50.44	151413	80612	11	22	0		157	5166649	50.445732	5250		4950	99.96	0.08	TRUE
562.64868	125	81	49	40	34	25	5017364	4993300	4922872	4856374	4742123	4419022	104	686975	5008897	50.72	240583	91059	7	16	0		125	5017364	50.729687	5046		4787	99.96	0.08	TRUE
562.64869	106	67	40	34	26	20	5265440	5242372	5187570	5149653	5032828	4815469	92	677960	5260051	50.29	366147	164692	5	11	0		106	5265440	50.28843	5278		4979	99.96	0.13	TRUE
562.6487	163	103	62	51	36	29	5214129	5180811	5074750	4999271	4750150	4495701	133	390134	5202558	50.63	148847	101373	11	21	0		163	5214129	50.634228	5300		5021	99.96	0.08	TRUE
562.64871	207	113	76	65	48	31	5170578	5117483	5036339	4967535	4695024	4052998	166	351620	5154629	50.71	104973	62520	13	28	0		207	5170578	50.72352	5180		4938	99.96	0.13	TRUE
562.64872	88	66	40	30	24	19	5041265	5027471	4957716	4892079	4792562	4622144	81	658850	5038533	50.61	283621	172611	6	12	0		88	5041265	50.61081	5032		4780	99.96	0.62	TRUE
562.64873	125	73	47	43	33	27	5205562	5177478	5119911	5089994	4938734	4727796	98	401697	5194453	50.77	213707	121543	10	17	0		125	5205562	50.77865	5256		5001	99.96	0.08	TRUE
562.64874	73	54	38	29	25	18	5110648	5100068	5061893	4998929	4937640	4687116	64	883012	5107253	50.58	402370	203761	5	10	0		73	5110648	50.58382	5166		4892	99.96	0.62	TRUE
562.64875	86	54	35	33	28	22	5228628	5209978	5166331	5151117	5068700	4838513	75	658007	5224267	50.54	237787	145202	7	13	0		86	5228628	50.542458	5226		4958	99.96	0.08	TRUE
562.64876	126	81	52	41	34	25	5063877	5037207	4976894	4896233	4790691	4473532	110	409373	5057304	50.51	207278	105169	9	17	0		126	5063877	50.50411	5085		4841	99.96	0.15	TRUE
562.64877	61	41	26	26	24	20	4946716	4936568	4905116	4905116	4872956	4755030	49	525680	4942275	50.54	348797	210983	6	11	0		61	4946716	50.54256	4816		4631	99.96	0.13	TRUE
562.64878	66	53	36	34	27	18	4888257	4881395	4839402	4828039	4724629	4427531	60	524945	4886044	50.78	246032	190833	7	13	0		66	4888257	50.784626	4807		4569	99.96	0.11	TRUE
562.64879	123	72	43	38	30	24	5068861	5038823	4973490	4937872	4826235	4613789	104	445869	5061708	50.7	242156	135287	9	16	0		123	5068861	50.70486	5072		4817	99.96	0.11	TRUE
562.6488	90	69	49	46	40	26	4756465	4745378	4703030	4675720	4574203	4032366	78	444238	4751701	50.64	173559	86431	9	20	0		90	4756465	50.642147	4699		4489	99.96	0.08	TRUE
562.64881	81	51	30	28	28	24	4942564	4923764	4882251	4869979	4869979	4740952	73	596813	4939639	50.57	253066	130345	7	14	0		81	4942564	50.575573	4856		4638	98.9	0.08	TRUE
562.64882	102	61	39	33	27	24	4933723	4912277	4860012	4820712	4723468	4633664	79	708762	4924670	50.7	270568	112900	6	14	0		102	4933723	50.703335	4895		4683	99.96	0.08	TRUE
562.64883	85	63	41	37	26	19	5069045	5056896	5007186	4981649	4799461	4558305	74	836126	5064795	50.66	281685	147609	6	12	0		85	5069045	50.666843	5098		4840	99.96	0.62	TRUE
562.64884	138	86	50	45	31	23	5336172	5307155	5230903	5193719	5008975	4713626	114	498447	5326593	50.73	252441	143876	8	16	0		138	5336172	50.727993	5453		5151	99.96	0.08	TRUE
562.64885	101	63	37	35	27	20	5095948	5076360	5017886	5000706	4877963	4648228	78	760824	5087615	50.38	294921	132249	5	11	0		101	5095948	50.385345	5097		4821	99.96	0.08	TRUE
562.64886	184	88	63	53	42	28	5175524	5122020	5064434	4993871	4818755	4317828	135	439112	5156749	50.47	175460	68903	9	21	0		184	5175524	50.477882	5219		4934	99.96	0.17	TRUE
562.64887	86	57	32	26	21	16	4913510	4897183	4842411	4798421	4721674	4541374	75	663872	4909190	50.58	345283	202436	5	10	0		86	4913510	50.577915	4755		4533	99.96	0.08	TRUE
562.64888	302	147	73	53	36	27	5331823	5242163	5086144	4943239	4651333	4319273	233	619931	5305378	50.75	153001	77629	9	22	0		302	5331823	50.764324	5541		5240	99.96	0.08	TRUE
562.64889	126	79	47	42	32	24	5154808	5127521	5052341	5015081	4848511	4575405	106	528017	5147056	50.5	210770	103293	8	16	0		126	5154808	50.4883	5151		4896	99.96	0.08	TRUE
562.6489	119	94	68	59	51	38	5313658	5298895	5238739	5179604	5054922	4627148	106	371659	5308559	50.68	116331	72747	14	28	0		119	5313658	50.686512	5311		5055	99.96	0.44	TRUE
562.64891	160	104	61	54	47	33	4904904	4876068	4781296	4728077	4608272	4127076	128	325734	4892996	50.64	126980	71436	14	26	0		160	4904904	50.64835	4899		4686	99.96	0.08	TRUE
562.64892	63	49	34	30	27	19	5018445	5010918	4977887	4947296	4901804	4633031	55	841454	5015554	50.36	319381	138110	5	11	0		63	5018445	50.36068	5004		4734	99.96	0.08	TRUE
562.64893	172	111	74	67	52	33	5438282	5404452	5321495	5276227	5014456	4274192	140	408420	5426088	50.7	102940	61136	13	30	0		172	5438282	50.705517	5504		5239	99.96	0.13	TRUE
562.64894	122	74	47	39	29	23	5229580	5201723	5139588	5078214	4931022	4717508	103	620133	5222323	50.47	205456	143852	8	15	0		122	5229580	50.46849	5332		5064	99.96	0.93	TRUE
562.64895	128	74	48	40	32	27	5262983	5232413	5165480	5110917	4990600	4834775	106	635547	5254430	50.46	254261	100536	7	17	0		128	5262983	50.467464	5274		4975	99.88	0.08	TRUE
562.64896	161	83	44	37	23	18	4942193	4899367	4804283	4756795	4544647	4374884	119	517624	4926001	50.69	294729	178994	7	12	0		161	4942193	50.69703	4930		4672	99.96	0.11	TRUE
562.64897	96	62	42	37	32	26	4997259	4979944	4934808	4899036	4812791	4598136	77	353627	4990312	50.62	190913	136368	10	17	0		96	4997259	50.62295	4971		4733	99.96	0.08	TRUE
562.64898	107	89	62	58	38	27	4670887	4661491	4605671	4574614	4208255	3830966	98	502220	4667621	50.79	122873	70630	10	22	0		107	4670887	50.79686	4600		4403	99.96	0.39	TRUE
562.64899	100	60	37	29	25	20	5108661	5084883	5037866	4984724	4918582	4756398	88	624988	5104314	50.43	301129	202437	6	11	0		100	5108661	50.434547	5047		4776	99.96	0.13	TRUE
562.649	102	88	72	64	52	35	4727986	4719728	4682239	4624686	4415246	3781237	97	388968	4726006	50.82	88007	59421	15	31	0		102	4727986	50.825256	4682		4469	99.96	0.08	TRUE
562.64901	125	79	54	48	38	29	5184162	5160516	5107363	5063238	4899806	4580960	99	443965	5174371	50.64	210627	91379	9	19	0		125	5184162	50.648647	5132		4884	99.96	0.13	TRUE
562.64902	140	100	65	57	43	33	4801437	4781733	4705379	4647573	4425152	4053646	114	289944	4791238	50.68	131442	72118	14	26	0		140	4801437	50.694218	4790		4555	99.96	0.08	TRUE
562.64903	119	81	58	51	39	23	5168540	5144966	5092965	5041259	4815159	4262093	107	406002	5163914	50.35	215352	81863	9	18	0		119	5168540	50.35397	5222		4972	99.96	0.69	TRUE
562.64904	79	55	38	34	29	24	5170569	5156183	5125894	5099343	5026487	4850147	70	543958	5167152	50.41	281982	122767	7	14	0		79	5170569	50.404316	5216		4925	99.96	0.69	TRUE
562.64905	116	86	52	41	33	21	4979616	4963161	4884761	4808682	4667147	4265200	101	755067	4974064	50.37	262451	103061	6	15	0		116	4979616	50.36519	4914		4646	99.96	0.12	TRUE
562.64906	122	73	45	38	33	25	5105688	5078136	5026819	4981116	4902988	4610640	102	504028	5097814	50.78	241751	114601	8	15	0		122	5105688	50.793606	5093		4848	99.96	0.08	TRUE
562.64907	40	29	19	19	18	15	4766446	4760401	4733853	4733853	4709701	4619914	34	752796	4764270	50.46	490475	226272	4	8	0		40	4766446	50.462776	4516		4341	99.96	0.45	TRUE
562.64908	77	62	34	30	24	17	5063947	5054802	4982490	4954713	4865882	4626518	71	1081449	5061722	50.53	375743	144402	4	10	0		77	5063947	50.52697	5091		4818	99.96	0.62	TRUE
562.64909	100	67	33	29	22	18	5149458	5127792	5059282	5029694	4922251	4781891	89	709234	5145302	50.44	354132	161491	6	11	0		100	5149458	50.43836	5174		4923	99.96	0.62	TRUE
562.6491	117	80	52	50	45	32	4892098	4871089	4811945	4795435	4721756	4250075	101	400102	4885585	50.68	147297	84038	12	24	0		117	4892098	50.689396	4884		4660	99.65	0.08	TRUE
562.64911	308	199	113	91	63	35	5216629	5156502	4948270	4789974	4361960	3324422	259	358718	5198185	50.79	68880	37839	23	49	0		308	5216629	50.788105	5470		5186	99.96	0.62	TRUE
562.64912	176	107	70	57	39	27	5129348	5090214	5000497	4910962	4635915	4245426	144	628140	5117151	50.51	140002	94952	10	21	0		176	5129348	50.511215	5128		4848	99.96	0.08	TRUE
562.64913	105	74	50	47	41	31	5128345	5109968	5062171	5043979	4960371	4588384	91	457734	5123029	50.66	207863	81088	9	20	0		105	5128345	50.663692	5103		4866	99.96	0.13	TRUE
562.64914	99	78	58	53	45	32	4734462	4723134	4681023	4646255	4482857	4028175	90	429253	4731183	50.68	130052	68435	13	25	0		99	4734462	50.675747	4644		4448	99.96	0.08	TRUE
562.64915	140	94	69	55	45	31	5378043	5350049	5286139	5191187	5028839	4501112	121	463445	5370703	50.69	151075	81698	11	24	0		140	5378043	50.690315	5385		5127	99.96	0.13	TRUE
562.64916	93	67	39	37	28	21	4941069	4928477	4875926	4858441	4725257	4500716	75	583897	4934299	50.74	294729	137432	6	12	0		93	4941069	50.752254	4916		4664	99.96	0.11	TRUE
562.64917	81	59	36	32	26	22	4979055	4965157	4918194	4892619	4816459	4686167	74	616869	4976208	50.58	303893	132336	6	13	0		81	4979055	50.576946	4870		4622	99.96	0.08	TRUE
562.64918	51	44	33	28	22	15	5090667	5086282	5057917	5021201	4912691	4644069	49	1078193	5089991	50.6	411343	237694	4	8	0		51	5090667	50.60003	5050		4792	99.96	0.11	TRUE
562.64919	59	47	31	29	26	20	4841913	4835304	4802085	4789404	4754167	4569036	52	705374	4839487	50.46	272541	144956	5	11	0		59	4841913	50.46117	4667		4501	99.96	0.08	TRUE
562.6492	53	43	29	29	23	20	5095766	5089568	5053211	5053211	4977486	4872647	50	622974	5094637	50.72	276425	187502	7	12	0		53	5095766	50.721188	5094		4835	99.96	0.15	TRUE
562.64921	145	82	54	39	33	23	5223340	5186085	5122308	5007571	4913524	4599851	121	577239	5214188	50.41	202430	110172	8	16	0		145	5223340	50.412323	5216		4929	99.96	0.08	TRUE
562.64922	97	72	47	41	31	25	5153719	5138645	5083342	5042181	4888844	4680380	86	516653	5148979	50.73	221386	123597	8	16	0		97	5153719	50.732277	5166		4909	99.96	0.08	TRUE
562.64923	123	80	52	48	30	26	5120159	5094652	5036785	5008524	4720644	4569749	106	622980	5113385	50.8	209196	104222	8	17	0		123	5120159	50.805122	5110		4865	99.96	0.08	TRUE
562.64924	188	126	73	64	48	33	5109527	5073463	4943499	4886835	4642367	4101676	161	329058	5098713	50.7	118883	60070	14	29	0		188	5109527	50.712307	5176		4914	99.96	0.08	TRUE
562.64925	170	96	58	46	31	26	5281272	5235651	5154529	5062826	4842454	4672510	144	370330	5270821	50.64	245384	104094	9	17	0		170	5281272	50.649807	5379		5090	99.96	0.31	TRUE
562.64926	178	91	58	47	31	25	5378611	5327987	5247348	5172167	4913100	4698417	141	658287	5364115	50.36	199611	101970	7	16	0		178	5378611	50.370365	5510		5197	99.96	0.08	TRUE
562.64927	161	93	63	53	40	28	5053411	5016390	4951604	4881471	4676725	4294974	124	363683	5038562	50.6	134751	100933	11	22	0		161	5053411	50.609695	5083		4833	99.96	0.08	TRUE
562.64928	194	109	67	58	45	32	5167317	5118451	5039370	4975300	4762199	4312748	154	429642	5151840	50.55	124053	67711	12	25	0		194	5167317	50.560726	5182		4924	99.96	0.62	TRUE
562.64929	46	28	18	17	17	13	5142038	5131750	5109468	5102781	5102781	4953814	37	912596	5138713	50.4	660622	464603	4	6	0		46	5142038	50.40165	5126		4880	99.96	0.58	TRUE
562.6493	197	134	99	82	56	31	4719389	4686455	4606305	4481801	4076752	3164451	163	235321	4707022	50.66	88133	37681	20	40	0		197	4719389	50.66785	4764		4570	99.96	0.5	TRUE
562.64931	81	58	37	34	32	21	5044368	5028193	4984578	4963655	4927000	4522162	77	505605	5042774	50.48	287729	128859	7	14	0		81	5044368	50.481747	5016		4764	99.96	0.92	TRUE
562.64932	259	149	84	66	52	35	5373138	5308804	5161530	5024928	4788318	4230722	216	260516	5356881	50.62	115072	64487	15	32	0		259	5373138	50.619823	5538		5218	99.96	0.45	TRUE
562.64933	149	87	47	35	24	21	5150156	5113289	5027425	4938671	4772024	4674044	124	727085	5140226	50.47	265969	134504	6	13	0		149	5150156	50.47754	5158		4878	99.96	0.08	TRUE
562.64934	56	39	27	26	24	20	4677463	4667925	4644559	4638325	4603969	4465748	48	548066	4674392	50.79	296198	195864	7	11	0		56	4677463	50.792942	4556		4380	99.96	0.08	TRUE
562.64935	110	72	50	42	30	22	5113836	5090445	5042234	4975642	4790956	4533530	96	586351	5108324	50.43	222680	116955	7	14	0		110	5113836	50.433723	5155		4889	99.96	0.64	TRUE
562.64936	141	130	95	81	62	35	4406701	4400376	4317505	4208977	3903604	2981859	137	227411	4405247	50.93	66954	38336	22	43	0		141	4406701	50.932137	4353		4189	99.96	0.74	TRUE
562.64937	80	52	32	26	22	18	5075320	5060072	5019055	4979931	4916182	4780287	68	743791	5070957	50.55	542167	144831	4	10	0		80	5075320	50.557697	5004		4780	99.96	0.23	TRUE
562.64938	102	63	39	36	27	21	5047797	5024838	4973770	4950198	4806460	4613659	85	609320	5041105	50.57	273765	149847	6	12	0		102	5047797	50.569565	5080		4815	99.96	0.62	TRUE
562.64939	166	103	68	58	46	31	5155829	5115368	5035974	4960101	4760974	4219570	151	543164	5150052	50.46	109740	63678	11	25	0		166	5155829	50.46201	5247		4938	99.04	0.23	TRUE
562.6494	69	51	29	26	25	18	4865426	4853953	4809203	4789355	4765889	4510841	65	684168	4863969	50.73	333967	183888	6	10	0		69	4865426	50.735947	4817		4607	99.96	0.12	TRUE
562.64941	75	55	35	31	24	20	4995235	4981749	4933223	4906084	4793471	4654620	71	805765	4993637	50.6	236596	156860	6	12	0		75	4995235	50.601925	4979		4730	99.96	0.62	TRUE
562.64942	105	82	62	53	46	32	5084323	5070436	5033821	4967115	4843377	4365902	96	280555	5080675	50.61	136661	85574	13	25	0		105	5084323	50.61205	5015		4787	99.58	0.13	TRUE
562.64943	82	59	43	42	36	25	5024870	5011125	4979494	4974390	4873896	4478104	72	898858	5020841	50.51	185224	113169	7	16	0		82	5024870	50.51888	4884		4634	99.96	0.08	TRUE
562.64944	115	60	38	32	27	22	5242909	5212490	5161715	5120405	5050253	4877663	88	602161	5232868	50.59	294533	129062	6	13	0		115	5242909	50.59165	5348		5065	99.96	0.62	TRUE
562.64945	142	94	62	55	42	29	5326344	5299851	5232468	5175194	4953071	4465528	115	357833	5315892	50.63	169348	74395	10	22	0		142	5326344	50.638073	5353		5107	99.96	0.48	TRUE
562.64946	135	76	40	35	23	20	5092259	5060404	4979993	4943483	4739248	4636843	107	668457	5081044	50.51	213669	141537	6	13	0		135	5092259	50.516224	5065		4806	99.96	0.13	TRUE
562.64947	78	51	33	31	27	21	5013172	4997809	4962347	4949618	4903539	4690455	66	924609	5008493	50.57	263829	147303	5	11	0		78	5013172	50.575085	5009		4771	99.96	0.08	TRUE
562.64948	35	31	26	25	24	15	4656776	4654267	4643003	4636053	4621843	4296363	34	685880	4656473	50.59	328121	182322	5	10	0		35	4656776	50.58648	4502		4315	99.96	0.08	TRUE
562.64949	171	90	55	44	29	23	5321119	5272166	5200877	5128349	4877445	4689645	147	705422	5311814	50.28	266638	112928	7	14	0		171	5321119	50.28309	5447		5123	99.96	0.08	TRUE
562.6495	112	70	44	37	28	22	4947333	4923064	4866255	4823006	4681226	4454655	93	400727	4939470	50.53	234293	132652	7	14	0		112	4947333	50.536846	4884		4653	99.34	0.23	TRUE
562.64951	91	72	52	43	37	21	4890375	4879250	4832427	4764647	4681238	4099770	83	425131	4887182	50.41	219835	113746	8	15	0		91	4890375	50.405216	4837		4603	99.96	0.08	TRUE
562.64952	150	89	53	46	35	30	5240220	5206613	5124092	5066932	4899353	4722371	123	370178	5229738	50.66	196106	94689	10	19	0		150	5240220	50.663635	5303		5025	99.96	0.31	TRUE
562.64953	114	80	55	50	34	27	5216963	5197087	5141293	5102361	4887776	4642905	100	622830	5211291	50.77	190808	107852	9	18	0		114	5216963	50.768982	5266		4992	99.96	0.08	TRUE
562.64954	81	55	39	35	25	20	5029901	5015771	4980966	4953249	4797414	4627937	68	556292	5025160	50.51	370410	159795	6	12	0		81	5029901	50.514175	4950		4707	99.96	0.08	TRUE
562.64955	81	61	41	41	33	25	4804732	4794582	4753545	4753545	4626378	4364106	70	658750	4800725	50.52	196624	102801	8	15	0		81	4804732	50.514744	4644		4453	99.96	0.08	TRUE
562.64956	96	73	47	39	30	23	4979960	4968682	4911813	4857102	4709069	4462766	82	863317	4974783	50.51	204864	129062	8	16	0		96	4979960	50.50709	4968		4714	99.96	0.62	TRUE
562.64957	139	94	63	56	42	30	5225812	5202578	5126676	5077739	4867933	4427360	112	471131	5215161	50.7	169473	80854	10	22	0		139	5225812	50.706932	5227		4974	99.96	0.13	TRUE
562.64958	133	83	44	37	24	19	5034142	5005859	4917900	4862708	4649573	4480427	112	752521	5025811	50.54	332698	141537	6	12	0		133	5034142	50.532623	4986		4745	99.96	0.08	TRUE
562.64959	60	50	35	29	22	18	5027352	5021155	4986113	4948040	4842774	4707350	58	1015942	5026550	50.71	276425	190808	5	10	0		60	5027352	50.705204	4960		4727	99.96	0.62	TRUE
562.6496	130	74	42	35	29	23	5154617	5121340	5054872	5006247	4912176	4708432	108	595429	5145727	50.44	231966	132671	8	15	0		130	5154617	50.4472	5186		4901	99.96	0.13	TRUE
562.64961	121	86	66	59	43	29	5043793	5023527	4976099	4924554	4645921	4142890	106	371372	5038024	50.74	144651	68189	10	23	0		121	5043793	50.741436	5009		4786	99.96	0.39	TRUE
562.64962	70	46	27	26	24	19	5105109	5091089	5055904	5048443	5026256	4855091	62	1002813	5102036	50.63	351726	190714	5	10	0		70	5105109	50.62979	5088		4838	99.96	0.08	TRUE
562.64963	114	91	65	58	42	30	5203745	5191151	5130643	5084680	4817954	4347246	104	353526	5199858	50.43	136440	89523	12	24	0		114	5203745	50.43183	5119		4867	99.96	0.15	TRUE
562.64964	80	64	51	48	39	28	5018693	5009414	4981535	4953347	4796664	4428239	72	363931	5015837	50.47	155370	98316	10	20	0		80	5018693	50.47392	4933		4687	99.96	0.12	TRUE
562.64965	82	54	38	32	27	21	4896281	4882770	4847498	4801443	4722995	4531318	63	783053	4889365	50.52	262619	119178	5	12	0		82	4896281	50.521427	4779		4543	99.65	0.08	TRUE
562.64966	148	105	71	62	54	34	5282057	5255508	5187566	5121172	4984611	4277995	129	356009	5274425	50.7	102941	62800	13	29	0		148	5282057	50.700817	5288		5023	99.96	0.44	TRUE
562.64967	62	48	34	32	26	18	4889489	4882042	4846940	4835577	4744130	4471410	53	524946	4886043	50.79	269713	190833	7	12	0		62	4889489	50.791687	4806		4567	99.96	0.11	TRUE
562.64968	40	32	22	22	22	16	4874026	4868180	4846302	4846302	4846302	4636029	39	1110658	4873665	50.5	436357	268292	4	7	0		40	4874026	50.50287	4788		4589	99.96	0.12	TRUE
562.64969	161	99	56	46	36	28	5246709	5209955	5102052	5023597	4868236	4573491	136	460043	5236851	50.54	211804	91372	9	19	0		161	5246709	50.54176	5293		5003	99.96	0.13	TRUE
562.6497	141	103	73	60	46	27	5173183	5152004	5092240	5005058	4770862	4120253	123	428023	5166570	50.61	141371	68550	10	23	0		141	5173183	50.619434	5167		4914	99.96	0.13	TRUE
562.64971	93	57	33	30	24	20	5074874	5053293	5000857	4982548	4907443	4760413	80	595549	5069762	50.59	319616	184617	7	12	0		93	5074874	50.594006	5070		4822	99.96	0.13	TRUE
562.64972	141	84	52	42	32	27	5298111	5263489	5193809	5118911	4976152	4794994	117	346745	5288139	50.63	197587	124523	10	18	0		141	5298111	50.63446	5414		5136	99.96	0.15	TRUE
562.64973	54	42	28	25	25	22	5196933	5190515	5153111	5134224	5134224	5016004	47	663530	5194250	50.47	370302	148595	6	11	0		54	5196933	50.47202	5171		4899	99.96	0.08	TRUE
562.64974	150	88	58	49	41	28	5324191	5287977	5227280	5162431	5035875	4580129	127	377477	5315253	50.55	167075	109991	10	20	0		150	5324191	50.555717	5382		5104	99.96	0.08	TRUE
562.64975	98	72	46	40	35	29	4968534	4953483	4907533	4871351	4781012	4554977	87	437201	4964055	50.57	159734	105058	10	20	0		98	4968534	50.57818	4954		4698	99.96	0.08	TRUE
562.64976	92	70	48	42	37	27	4575695	4563757	4513861	4468196	4398404	4038219	81	366393	4571570	50.82	152148	100996	11	20	0		92	4575695	50.820236	4511		4316	99.96	0.08	TRUE
562.64977	102	68	49	41	35	27	5212564	5194400	5158598	5102771	4988221	4712293	84	528394	5205677	50.51	198871	121314	10	18	0		102	5212564	50.509693	5218		5000	99.96	0.89	TRUE
562.64978	66	41	25	25	24	20	5136506	5124135	5094342	5094342	5076399	4942531	50	886226	5130545	50.59	355581	163929	5	10	0		66	5136506	50.59379	5134		4862	99.96	0.62	TRUE
562.64979	190	145	85	71	55	39	5350313	5326648	5187772	5086555	4848204	4237100	168	332717	5341839	50.4	101399	57494	18	35	0		190	5350313	50.40049	5386		5145	99.96	1.87	TRUE
562.6498	61	43	26	22	22	18	5084714	5075645	5041420	5010519	5010519	4876650	51	1001775	5081003	50.5	358106	175759	4	9	0		61	5084714	50.507107	5074		4807	99.96	0.62	TRUE
562.64981	78	55	37	36	32	25	4730793	4717163	4681846	4674314	4607869	4371685	68	592810	4726911	50.74	189773	130492	8	15	0		78	4730793	50.745487	4618		4432	99.96	0.45	TRUE
562.64982	143	65	40	39	33	23	5219901	5176252	5125437	5116845	5006110	4688286	104	430061	5205003	50.61	272821	133757	8	15	0		143	5219901	50.61661	5168		4919	99.96	0.28	TRUE
562.64983	110	73	47	40	33	25	5117219	5094987	5036792	4989023	4880943	4607044	96	487988	5112083	50.44	202436	108524	8	16	0		110	5117219	50.44443	5079		4810	99.96	0.08	TRUE
562.64984	88	56	39	37	31	22	5036585	5017150	4981137	4970093	4881423	4559324	74	509491	5031101	50.63	275354	121812	7	14	0		88	5036585	50.632263	4907		4702	99.65	0.13	TRUE
562.64985	134	95	49	41	27	22	5262121	5239783	5127781	5071210	4868084	4696266	118	620732	5255485	50.77	271701	163815	7	14	0		134	5262121	50.775513	5322		5066	99.96	0.08	TRUE
562.64986	105	76	49	45	39	28	5179350	5162502	5107246	5078521	4988869	4581270	93	681168	5175074	50.76	219841	94947	8	18	0		105	5179350	50.76357	5145		4896	99.96	0.13	TRUE
562.64987	51	38	28	25	22	18	4843602	4836604	4814523	4795052	4738279	4608262	47	752199	4842118	50.53	339554	187081	5	10	0		51	4843602	50.535305	4745		4501	99.96	0.08	TRUE
562.64988	164	94	58	47	35	29	5275546	5235433	5150587	5069328	4872310	4676388	132	518918	5262788	50.36	165124	101969	10	20	0		164	5275546	50.360435	5318		5023	99.96	0.08	TRUE
562.64989	165	84	47	42	32	24	5177324	5135233	5045328	5009405	4876429	4590566	123	399789	5160904	50.8	229753	123597	8	16	0		165	5177324	50.809917	5254		4998	99.96	0.08	TRUE
562.6499	135	95	71	62	47	35	5136304	5114643	5067267	5002780	4779062	4329055	114	521390	5127807	50.72	106575	66302	12	27	0		135	5136304	50.730137	5169		4921	99.65	0.13	TRUE
562.64991	126	75	49	43	32	21	5165558	5138230	5082865	5040717	4869796	4482043	97	578732	5154410	50.41	275909	110584	7	13	0		126	5165558	50.417805	5175		4896	99.96	0.12	TRUE
562.64992	62	49	30	28	23	17	5175804	5168005	5123459	5111748	5043843	4829327	57	886222	5173925	50.61	543049	178621	4	9	0		62	5175804	50.609894	5165		4891	99.96	0.62	TRUE
562.64993	76	60	39	35	28	21	5253531	5244456	5193891	5165113	5063041	4812147	69	654095	5250544	50.79	285655	150357	7	13	0		76	5253531	50.78457	5298		5032	99.96	0.08	TRUE
562.64994	82	60	42	40	31	24	5102529	5089397	5049592	5035612	4882199	4607269	75	399915	5099805	50.75	229727	123597	8	16	0		82	5102529	50.752735	5102		4849	99.96	0.08	TRUE
562.64995	117	74	46	42	32	26	5196278	5169894	5100608	5071596	4921519	4723956	101	400071	5189965	50.78	190808	123598	10	18	0		117	5196278	50.78231	5216		4963	99.96	0.31	TRUE
562.64996	87	59	36	36	31	23	5138145	5125054	5079530	5079530	5000316	4721462	68	468399	5131034	50.58	272932	145352	7	14	0		87	5138145	50.582592	5151		4890	99.96	0.62	TRUE
[truncated: 948 more rows]
