# Supplementary material for: PangenomeNet: a pan-genome-based network reveals functional modules on antimicrobial resistome for Escherichia coli strains
Source: BMC Bioinformatics. 2021 Nov 10;22:548. doi: 10.1186/s12859-021-04459-z (PMC8579557; doi:10.1186/s12859-021-04459-z)
Supplement: Supplementary file 4 — Additional file 4: Table S3. Scoary-detected resistant gene annotation statistics. [file 12859_2021_4459_MOESM4_ESM.csv]

Antibiotics	%GO	%Hypothetical	%CARD	%Resfam	Number of genes	Susceptible	Resistant
cefepime					0	32	20
tigecycline					0	1033	1
cephalothin					0	2	86
tobramycin	1	0	1	1	1	24	67
trimethoprim-sulfamethoxazole	1	0	0.5	0.5	2	20	53
imipenem	0.5	0.5	0.5	0.5	2	1100	8
trimethoprim	0.888888889	0	0.333333333	0.333333333	9	25	58
azithromycin	0.636363636	0.181818182	0.181818182	0.363636364	11	156	14
ceftriaxone	0.6875	0.125	0.25	0.25	16	22	48
tetracycline	0.75	0.1	0.35	0.3	20	83	122
piperacillin-tazobactam	0.333333333	0.285714286	0.19047619	0.142857143	21	1054	74
ampicillin	0.533333333	0.133333333	0.066666667	0.066666667	30	11	175
streptomycin	0.566666667	0.333333333	0.133333333	0.133333333	30	97	72
chloramphenicol	0.395348837	0.395348837	0.093023256	0.139534884	43	195	36
amoxicillin-clavunate	0.307692308	0.480769231	0.096153846	0.096153846	52	768	330
amoxicillin	0.453703704	0.425925926	0.12962963	0.148148148	108	444	707
cefuroxime	0.34169279	0.495297806	0.05015674	0.065830721	319	917	260
gentamicin	0.331018519	0.532407407	0.043981481	0.060185185	432	1069	171
ceftazidime	0.330254042	0.487297921	0.043879908	0.062355658	433	1063	154
cefotaxime	0.345098039	0.521568627	0.037254902	0.060784314	510	951	178
meropenem	0.301610542	0.543191801	0.01317716	0.030746706	683	39	17
ciprofloxacin	0.314631463	0.501650165	0.01760176	0.03740374	909	967	309
