# Supplementary material for: PangenomeNet: a pan-genome-based network reveals functional modules on antimicrobial resistome for Escherichia coli strains
Source: BMC Bioinformatics. 2021 Nov 10;22:548. doi: 10.1186/s12859-021-04459-z (PMC8579557; doi:10.1186/s12859-021-04459-z)
Supplement: Supplementary file 5 — Additional file 5: Table S4. GO enrichment results for all Scoary-detected resistant genes. [file 12859_2021_4459_MOESM5_ESM.xlsx]

## Sheet: piperacillin-tazobactam
	Name	Namespace	ID

## Sheet: chloramphenicol
	Name	Namespace	ID

## Sheet: tobramycin
	Name	Namespace	ID

## Sheet: tetracycline
	Name	Namespace	ID
0	response to antibiotic	biological_process	GO:0046677

## Sheet: ceftazidime
	Name	Namespace	ID
0	response to antibiotic	biological_process	GO:0046677
1	transposition, DNA-mediated	biological_process	GO:0006313
2	aromatic compound catabolic process	biological_process	GO:0019439
3	transposase activity	molecular_function	GO:0004803

## Sheet: amoxicillin-clavunate
	Name	Namespace	ID

## Sheet: ciprofloxacin
	Name	Namespace	ID

## Sheet: trimethoprim
	Name	Namespace	ID

## Sheet: ampicillin
	Name	Namespace	ID
0	beta-lactam antibiotic catabolic process	biological_process	GO:0030655
1	conjugation	biological_process	GO:0000746
2	beta-lactamase activity	molecular_function	GO:0008800

## Sheet: ceftriaxone
	Name	Namespace	ID

[truncated: 10 more sheets: gentamicin, cefotaxime, streptomycin, meropenem, imipenem, amoxicillin, trimethoprim-sulfamethoxazole, amoxicillin-clavulanate, azithromycin, cefuroxime]
