# Supplementary material for: PangenomeNet: a pan-genome-based network reveals functional modules on antimicrobial resistome for Escherichia coli strains
Source: BMC Bioinformatics. 2021 Nov 10;22:548. doi: 10.1186/s12859-021-04459-z (PMC8579557; doi:10.1186/s12859-021-04459-z)
Supplement: Supplementary file 7 — Additional file 7: Table S6. This compressed csv file contains all resistant gene annotation. [file 12859_2021_4459_MOESM7_ESM.bz2]

Archive with 2 entries (2 files):
- ._TableS6_Subnet_node_annotation.csv
- TableS6_Subnet_node_annotation.csv
