# Supplementary material for: PangenomeNet: a pan-genome-based network reveals functional modules on antimicrobial resistome for Escherichia coli strains
Source: BMC Bioinformatics. 2021 Nov 10;22:548. doi: 10.1186/s12859-021-04459-z (PMC8579557; doi:10.1186/s12859-021-04459-z)
Supplement: Supplementary file 7 — Additional file 7: Table S6. This compressed csv file contains all resistant gene annotation. [file 12859_2021_4459_MOESM7_ESM.bz2 › TableS6_Subnet_node_annotation.csv]

	cog_ID	cog_category	cluster	count	core	is_card	Best_Hit_ARO	ARO	resfam	is_resfam	aclame_title	is_aclame	drug_target	is_drug_target	GO	cellular_component	molecular_function	biological_process	pathway	domain	nr	hypo_nr	gene_id
562.22429.con.0018_22|562.22429	COG0433	R	Cluster 3257	2930.0	True	False				False		False		False					{'Reactome: R-HSA-8856828', 'Reactome: R-DME-2179392', 'MetaCyc: PWY-6027', 'Reactome: R-GGA-68689', 'Reactome: R-RNO-5696400', 'Reactome: R-BTA-73817', 'Reactome: R-MMU-381042', 'Reactome: R-GGA-2871796', 'Reactome: R-HSA-5693565', 'Reactome: R-DME-5610780', 'Reactome: R-DDI-5358565', 'Reactome: R-HSA-9684325', 'MetaCyc: PWY-3841', 'Reactome: R-HSA-1660514', 'MetaCyc: PWY-6659', 'Reactome: R-HSA…	{'IPR027417', 'IPR033186'}	EIJ01580.1 PF05872 family protein [Escherichia coli B41]		1644
562.22429.con.0037_39|562.22429			Cluster 19135	161.0	False	False				False		False		False						{'IPR010179'}	4DZD_A Chain A, Crystal Structure Of The Crispr-associated Protein Cas6e From Escherichia Coli Str. K-12		1645
562.22429.con.0038_32|562.22429			Cluster 3580	133.0	False	False				False	protein:plasmid:15861 Length: 538 # NCBI annotation: transposition site target selection protein E # Family: family:all:5649 # MgeID: mge:369 # MgeName: R721 # Cross-refs: genbank:acc:NP_065316;genbank:gi:10955464;genbank:GeneID:1238714	True		False						{'IPR016421', 'IPR041419'}	WP_000251879.1 MULTISPECIES: transposase [Proteobacteria]		1646
562.22429.con.0038_37|562.22429			Cluster 27139	136.0	False	False				False	protein:plasmid:15860 Length: 125 # NCBI annotation: hypothetical protein # Family: family:all:8051 # MgeID: mge:369 # MgeName: R721 # Cross-refs: genbank:acc:NP_065315;genbank:gi:10955463;genbank:GeneID:1238744	True		False							WP_001271300.1 MULTISPECIES: hypothetical protein [Proteobacteria]	True	1647
562.22429.con.0067_2|562.22429	COG2227	H	Cluster 7386	61.0	False	False			{ArmA_Rmt}	True		False		False					{'MetaCyc: PWY-5301', 'MetaCyc: PWY-6027', 'MetaCyc: PWY-7091', 'MetaCyc: PWY-8007', 'Reactome: R-BTA-71288', 'Reactome: R-DRE-71288', 'MetaCyc: PWY-7161', 'Reactome: R-HSA-9684325', 'MetaCyc: PWY-7407', 'MetaCyc: PWY-6659', 'MetaCyc: PWY-5818', 'MetaCyc: PWY-5110', 'MetaCyc: PWY-7701', 'MetaCyc: PWY-7693', 'MetaCyc: PWY-6906', 'MetaCyc: PWY-7397', 'MetaCyc: PWY-7605', 'Reactome: R-HSA-197264', '…	{'IPR025714', 'IPR029063'}	WP_000440491.1 MULTISPECIES: class I SAM-dependent methyltransferase [Enterobacteriaceae]		1648
562.22430.con.0002_170|562.22430	COG3121	NU	Cluster 16320	720.0	False	False				False		False		False	{'GO:0030288', 'GO:0071555'}	{'GO:0030288'}		{'GO:0071555'}	{'Reactome: R-HSA-8856828', 'Reactome: R-RNO-210991', 'Reactome: R-MMU-2024096', 'Reactome: R-MMU-983695', 'Reactome: R-HSA-1660514', 'Reactome: R-MMU-419037', 'Reactome: R-HSA-5620916', 'Reactome: R-MMU-9027276', 'Reactome: R-HSA-2424491', 'MetaCyc: PWY-6051', 'MetaCyc: PWY-6720', 'Reactome: R-MMU-388841', 'MetaCyc: PWY-7057', 'Reactome: R-MMU-437239', 'MetaCyc: PWY-7487', 'Reactome: R-DDI-15976…	{'IPR008962', 'IPR013783', 'IPR016147'}	WP_001539788.1 hypothetical protein [Escherichia coli]	True	1649
562.22430.con.0021_57|562.22430	COG4637	S	Cluster 941	23.0	False	False				False	protein:plasmid:123563 Length: 894 # NCBI annotation: PHP-like # Family: family:all:3598 # MgeID: mge:1059 # MgeName: 1 # Cross-refs: genbank:gi:91790852;interpro:IPR003141;interpro:IPR003439;interpro:IPR004013;genbank:GeneID:4015907	True		False	{'GO:0003824'}		{'GO:0003824'}		{'Reactome: R-HSA-8856828', 'Reactome: R-DME-2179392', 'MetaCyc: PWY-6027', 'Reactome: R-GGA-68689', 'Reactome: R-RNO-5696400', 'Reactome: R-BTA-73817', 'Reactome: R-MMU-381042', 'Reactome: R-GGA-2871796', 'Reactome: R-HSA-5693565', 'Reactome: R-DME-5610780', 'Reactome: R-DDI-5358565', 'Reactome: R-HSA-9684325', 'MetaCyc: PWY-3841', 'Reactome: R-HSA-1660514', 'MetaCyc: PWY-6659', 'Reactome: R-HSA…	{'IPR027417', 'IPR016195'}	WP_000678689.1 MULTISPECIES: hypothetical protein [Enterobacteriaceae]	True	1650
562.22431.con.0028_51|562.22431			Cluster 39938	8.0	False	False				False	protein:plasmid:141117 Length: 421 # NCBI annotation: transposase # Family: family:all:24 # MgeID: mge:1959 # MgeName: pKPN3 # Cross-refs: genbank:gi:152973443;genbank:GeneID:5343079	True		False							AWF20326.1 putative transposase domain protein [Escherichia coli]		1651
562.22431.con.0037_3|562.22431	COG1479	S	Cluster 2667	19.0	False	False				False	protein:plasmid:136678 Length: 507 # NCBI annotation: hypothetical protein # Family: family:all:1459 # MgeID: mge:1032 # MgeName: pSYSM # Cross-refs: genbank:gi:38505667;genbank:GeneID:2655959	True		False						{'IPR004919', 'IPR011089'}	WP_000039875.1 MULTISPECIES: DUF262 domain-containing protein [Enterobacteriaceae]	True	1652
562.22431.con.0065_12|562.22431	COG3423	K	Cluster 32568	51.0	False	False				False	protein:proph:160494 Length: 85 # NCBI annotation: hypothetical protein # Family: family:all:920 # MgeID: mge:2066 # MgeName: prophinder:43828 # Cross-refs: genbank:acc:NP_930638;genbank:gi:37527294;genbank:GeneID:2803432	True		False	{'GO:0003677'}		{'GO:0003677'}		{'MetaCyc: PWY-6147', 'KEGG: 00910', 'Reactome: R-MMU-111465', 'KEGG: 00250', 'MetaCyc: PWY-8067', 'MetaCyc: PWY-7539', 'KEGG: 00270', 'MetaCyc: PWY-6749', 'MetaCyc: PWY-6502', 'Reactome: R-HSA-8940973', 'Reactome: R-HSA-6807505', 'Reactome: R-XTR-6807505', 'MetaCyc: PWY-7821', 'Reactome: R-MMU-6807505', 'Reactome: R-HSA-9018519', 'Reactome: R-HSA-210744', 'MetaCyc: PWY-8013', 'Reactome: R-HSA-18…	{'IPR038722', 'IPR010982'}	WP_001333498.1 MULTISPECIES: transcriptional regulator [Enterobacteriaceae]		1653
562.22431.con.0065_13|562.22431			Cluster 19534	51.0	False	False				False		False		False	{'GO:0008080'}		{'GO:0008080'}		{'MetaCyc: PWY-6027', 'Reactome: R-HSA-5693565', 'MetaCyc: PWY-7407', 'Reactome: R-MMU-350054', 'MetaCyc: PWY-7693', 'Reactome: R-HSA-177135', 'Reactome: R-RNO-5693607', 'Reactome: R-BTA-351200', 'MetaCyc: PWY-7694', 'MetaCyc: PWY-5994', 'Reactome: R-RNO-177128', 'Reactome: R-MMU-5693568', 'MetaCyc: PWY-8035', 'Reactome: R-SPO-351200', 'MetaCyc: PWY-6157', 'MetaCyc: PWY-7448', 'Reactome: R-MMU-56…	{'IPR016181', 'IPR000182'}	EFK16047.1 acetyltransferase, GNAT family [Escherichia coli MS 116-1]		1654
562.22431.con.0079_7|562.22431	COG3344	L	Cluster 3518	21.0	False	False				False	protein:proph:173710 Length: 302 # NCBI annotation: putative RNA-dependent DNA polymerase # Family: family:all:25126 # MgeID: mge:2441 # MgeName: prophinder:45757 # Cross-refs: genbank:acc:YP_856565;genbank:gi:117618233;genbank:GeneID:4487612	True		False	{'GO:0003723', 'GO:0003964', 'GO:0007165', 'GO:0006278', 'GO:0005515'}		{'GO:0005515', 'GO:0003723', 'GO:0003964'}	{'GO:0006278', 'GO:0007165'}	{'MetaCyc: PWY-5301', 'MetaCyc: PWY-6027', 'Reactome: R-RNO-5696400', 'Reactome: R-MMU-983695', 'Reactome: R-DME-376176', 'MetaCyc: PWY-7161', 'Reactome: R-HSA-9684325', 'MetaCyc: PWY-7407', 'Reactome: R-RNO-1810476', 'MetaCyc: PWY-7693', 'Reactome: R-HSA-975155', 'Reactome: R-MMU-174417', 'Reactome: R-HSA-110312', 'Reactome: R-DME-214874', 'Reactome: R-RNO-9014843', 'MetaCyc: PWY-5994', 'MetaCyc…	{'IPR000477', 'IPR035897', 'IPR000123', 'IPR000157', 'IPR043502'}	SQS33758.1 RNA-directed DNA polymerase [Escherichia coli]		1655
562.22431.con.0080_2|562.22431	COG1309	K	Cluster 17476	450.0	False	False				False	protein:plasmid:19669 Length: 222 # NCBI annotation: tetracycline resistance protein C # Family: family:all:643 # MgeID: mge:518 # MgeName: R100 # Cross-refs: genbank:acc:NP_052932;genbank:gi:9507601;genbank:GeneID:1263448	True		False	{'GO:0003677'}		{'GO:0003677'}		{'Reactome: R-CEL-3214842', 'MetaCyc: PWY-6027', 'Reactome: R-HSA-156711', 'Reactome: R-HSA-5693565', 'MetaCyc: PWY-7407', 'Reactome: R-MMU-72163', 'Reactome: R-MMU-350054', 'Reactome: R-XTR-174417', 'MetaCyc: PWY-7693', 'Reactome: R-MMU-174417', 'Reactome: R-HSA-1839117', 'Reactome: R-HSA-6785807', 'MetaCyc: PWY-7694', 'MetaCyc: PWY-5994', 'MetaCyc: PWY-2723', 'MetaCyc: PWY-8035', 'Reactome: R-R…	{'IPR009057', 'IPR001647', 'IPR023772'}	WP_001366182.1 MULTISPECIES: tetracyline resistance-associated transcriptional repressor TetC [Proteobacteria]		1656
562.22431.con.0107_1|562.22431			Cluster 23533	17.0	False	False				False	protein:plasmid:121341 Length: 165 # NCBI annotation: hypothetical protein # Family: family:all:14406 # MgeID: mge:1915 # MgeName: pRSPA04 # Cross-refs: genbank:gi:146280360;genbank:GeneID:5086547	True		False					{'KEGG: 00760', 'MetaCyc: PWY-5381', 'KEGG: 01100'}	{'IPR015032', 'IPR036490'}	WP_000824288.1 MULTISPECIES: molecular chaperone Tir [Enterobacteriaceae]		1657
562.22432.con.0030_2|562.22432			Cluster 16111	29.0	False	False				False	protein:proph:183612 Length: 218 # NCBI annotation: putative bacteriophage protein # Family: family:all:67 # MgeID: mge:2717 # MgeName: prophinder:46797 # Cross-refs: genbank:acc:YP_687842;genbank:gi:110804322;genbank:GeneID:4210172	True		False						{'IPR025153'}	WP_044068910.1 hypothetical protein [Escherichia coli]	True	1658
562.22432.con.0030_36|562.22432			Cluster 26044	29.0	False	False				False	protein:vir:101335 Length: 130 # NCBI annotation: UpfA # Family: family:all:3940 # MgeID: mge:1512 # MgeName: P1 # Cross-refs: genbank:acc:YP_006530;genbank:gi:46401684;genbank:GeneID:2777397	True		False							WP_033559551.1 hypothetical protein [Escherichia coli]	True	1659
562.22432.con.0050_10|562.22432			Cluster 599	85.0	False	False				False		False		False							WP_023909028.1 MULTISPECIES: hypothetical protein [Enterobacteriaceae]	True	1660
562.22432.con.0086_3|562.22432			Cluster 746	345.0	False	False				False	protein:vir:2032 Length: 669 # NCBI annotation: gpH # Family: family:all:13 # MgeID: mge:315 # MgeName: P2 # Cross-refs: genbank:acc:NP_046775;genbank:gi:9630346;genbank:GeneID:1261550	True		False					{'Reactome: R-MMU-977606', 'Reactome: R-HSA-977606', 'MetaCyc: PWY-6902', 'Reactome: R-RNO-977606', 'MetaCyc: PWY-7884', 'Reactome: R-CEL-432722', 'Reactome: R-HSA-264876', 'Reactome: R-RNO-432722', 'MetaCyc: PWY-6855', 'Reactome: R-MMU-163125', 'Reactome: R-HSA-2404192', 'MetaCyc: PWY-7822', 'Reactome: R-HSA-163125', 'Reactome: R-HSA-432722', 'KEGG: 01100', 'KEGG: 00520', 'Reactome: R-MMU-432722…	{'IPR013609', 'IPR008969'}	WP_121926806.1 phage tail protein [Escherichia coli]		1661
562.22432.con.0098_1|562.22432	COG1670	J	Cluster 16810	212.0	False	True	AAC(6')-Ib-cr	3002547.0	{AAC6-Ib, AAC6-II}	True	protein:plasmid:148158 Length: 199 # NCBI annotation: AAC(6')-Ib # Family: family:all:692 # MgeID: mge:1138 # MgeName: pC15-1a # Cross-refs: genbank:gi:41056929;genbank:GeneID:2716480	True		False	{'GO:0008080'}		{'GO:0008080'}		{'MetaCyc: PWY-6027', 'Reactome: R-HSA-5693565', 'MetaCyc: PWY-7407', 'Reactome: R-MMU-350054', 'MetaCyc: PWY-7693', 'Reactome: R-HSA-177135', 'Reactome: R-RNO-5693607', 'Reactome: R-BTA-351200', 'MetaCyc: PWY-7694', 'MetaCyc: PWY-5994', 'Reactome: R-RNO-177128', 'Reactome: R-MMU-5693568', 'MetaCyc: PWY-8035', 'Reactome: R-SPO-351200', 'MetaCyc: PWY-6157', 'MetaCyc: PWY-7448', 'Reactome: R-MMU-56…	{'IPR030971', 'IPR016181', 'IPR000182'}	WP_012783948.1 MULTISPECIES: AAC(6')-Ib family aminoglycoside 6'-N-acetyltransferase [Enterobacteriaceae]		1662
562.22432.con.0112_1|562.22432	COG0426	C	Cluster 18145	23.0	False	False			{ClassB, SubclassB3}	True	protein:plasmid:117753 Length: 213 # NCBI annotation: hypothetical protein # Family: family:all:7920 # MgeID: mge:946 # MgeName: pSC138 # Cross-refs: genbank:gi:60115578;genbank:GeneID:3283400	True		False					{'Reactome: R-RNO-5693571', 'KEGG: 00230', 'Reactome: R-BTA-1614517', 'KEGG: 00785', 'Reactome: R-RNO-6783310', 'KEGG: 00790', 'Reactome: R-MMU-72163', 'MetaCyc: PWY-7521', 'MetaCyc: PWY-6948', 'MetaCyc: PWY-8055', 'Reactome: R-DME-73856', 'Reactome: R-HSA-159231', 'Reactome: R-HSA-8868766', 'Reactome: R-HSA-2466712', 'MetaCyc: PWY-6415', 'Reactome: R-HSA-72163', 'MetaCyc: PWY-7807', 'MetaCyc: PW…	{'IPR001279', 'IPR036866'}	WP_004193071.1 MBL fold metallo-hydrolase [Salmonella enterica]		1663
562.22434.con.0019_4|562.22434			Cluster 23662	2928.0	True	False				False		False		False						{'IPR011223'}	ACB19899.1 conserved hypothetical protein [Escherichia coli SMS-3-5]	True	1664
562.22434.con.0036_55|562.22434			Cluster 26450	219.0	False	False				False	protein:plasmid:15914 Length: 130 # NCBI annotation: hypothetical protein # Family: family:all:269 # MgeID: mge:369 # MgeName: R721 # Cross-refs: genbank:acc:NP_065369;genbank:gi:10955517;genbank:GeneID:1238768	True		False						{'IPR009989'}	EHU69505.1 yggA protein [Escherichia coli DEC3E]		1665
562.22434.con.0066_1|562.22434			Cluster 28755	333.0	False	False				False	protein:plasmid:19664 Length: 106 # NCBI annotation: hypothetical protein # Family: family:all:2650 # MgeID: mge:518 # MgeName: R100 # Cross-refs: genbank:acc:NP_052927;genbank:gi:9507596;genbank:GeneID:1263405	True		False					{'KEGG: 01057', 'MetaCyc: PWY-5872', 'KEGG: 01120', 'MetaCyc: PWY-6935', 'KEGG: 00940', 'MetaCyc: PWY-5826', 'MetaCyc: PWY-8179', 'KEGG: 00270', 'KEGG: 00261', 'MetaCyc: PWY-7445', 'MetaCyc: PWY-7710', 'MetaCyc: PWY-7485', 'MetaCyc: PWY-5461', 'MetaCyc: PWY-5302', 'MetaCyc: PWY-8166', 'MetaCyc: PWY-8158', 'MetaCyc: PWY-7742', 'MetaCyc: PWY-7483', 'MetaCyc: PWY-8085', 'MetaCyc: PWY-8012', 'MetaCyc…	{'IPR011008', 'IPR007138'}	WP_072058320.1 antibiotic biosynthesis monooxygenase [Escherichia coli]		1666
562.22434.con.0066_5|562.22434	COG0477	G	Cluster 6908	465.0	False	True	tet(B)	3000166.0	{Chlor_Efflux_Pump, emrB, MFS_efflux, norA, TetA, TetA-B, TetA-G, TetD, TetE, TetH-TetJ, tet_MFS_efflux, TetY}	True	protein:plasmid:112742 Length: 424 # NCBI annotation: TetB # Family: family:all:10 # MgeID: mge:1134 # MgeName: pHS-Tet # Cross-refs: genbank:gi:58616069;genbank:GeneID:3267155	True		False	{'GO:0016021', 'GO:0055085', 'GO:0022857'}	{'GO:0016021'}	{'GO:0022857'}	{'GO:0055085'}	{'Reactome: R-RNO-210991', 'Reactome: R-MMU-159418', 'Reactome: R-HSA-8856828', 'Reactome: R-XTR-352230', 'Reactome: R-MMU-5653890', 'Reactome: R-RNO-196757', 'MetaCyc: PWY-6369', 'Reactome: R-HSA-352230', 'Reactome: R-MMU-196819', 'Reactome: R-HSA-442660', 'Reactome: R-HSA-5662702', 'Reactome: R-DME-422356', 'Reactome: R-DME-196836', 'Reactome: R-CEL-428643', 'Reactome: R-HSA-5619070', 'Reactome…	{'IPR036259', 'IPR020846', 'IPR005829', 'IPR001958', 'IPR011701'}	WP_002035597.1 tetracycline efflux MFS transporter Tet(B) [Raoultella planticola]		1667
562.22435.con.0007_40|562.22435			Cluster 20109	8.0	False	False				False	protein:proph:183003 Length: 213 # NCBI annotation: hypothetical protein # Family: family:all:67 # MgeID: mge:2699 # MgeName: prophinder:44518 # Cross-refs: genbank:acc:YP_001457046;genbank:gi:157159728;genbank:GeneID:5591992	True		False						{'IPR007539'}	WP_060503998.1 DUF551 domain-containing protein [Escherichia coli]	True	1668
562.22435.con.0036_12|562.22435			Cluster 790	1982.0	False	False				False	protein:plasmid:123197 Length: 940 # NCBI annotation: TraG # Family: family:all:271 # MgeID: mge:845 # MgeName: pAPEC-O2-ColV # Cross-refs: genbank:gi:84060758;genbank:GeneID:3853399	True		False						{'IPR012931'}	WP_123293135.1 conjugal transfer protein TraG [Escherichia coli]		1669
562.22435.con.0055_31|562.22435			Cluster 41663	43.0	False	False				False		False		False									1670
562.22435.con.0061_4|562.22435			Cluster 25810	116.0	False	False				False	protein:proph:169101 Length: 138 # NCBI annotation: hypothetical protein # Family: family:all:67 # MgeID: mge:2315 # MgeName: prophinder:44082 # Cross-refs: genbank:acc:YP_407456;genbank:gi:82543509;genbank:GeneID:3779276	True		False							WP_000137947.1 MULTISPECIES: hypothetical protein [Escherichia]	True	1671
562.22436.con.0002_209|562.22436	COG3124	S	Cluster 18297	2931.0	True	False				False		False		False	{'GO:0008770', 'GO:0006633'}		{'GO:0008770'}	{'GO:0006633'}	{'MetaCyc: PWY-6012', 'KEGG: 00770'}	{'IPR023491', 'IPR007431'}	EGI42300.1 (acyl-carrier-protein) phosphodiesterase [Escherichia coli TA280]		1672
562.22436.con.0008_39|562.22436			Cluster 19220	95.0	False	False				False		False		False							ELG92735.1 hypothetical protein A313_01882 [Escherichia coli KTE147]	True	1673
562.22436.con.0012_68|562.22436	COG4235	O	Cluster 17549	2928.0	True	False				False		False		False	{'GO:0005515'}		{'GO:0005515'}		{'Reactome: R-HSA-8856828', 'MetaCyc: PWY-5301', 'Reactome: R-BTA-69017', 'Reactome: R-RNO-5689880', 'Reactome: R-HSA-6796648', 'Reactome: R-DDI-6798695', 'Reactome: R-HSA-418594', 'Reactome: R-MMU-8876198', 'Reactome: R-HSA-3108214', 'MetaCyc: PWY-7161', 'Reactome: R-HSA-5693565', 'Reactome: R-DDI-5358565', 'Reactome: R-MMU-72163', 'Reactome: R-HSA-975957', 'MetaCyc: PWY-5800', 'Reactome: R-RNO-…	{'IPR011990', 'IPR019734', 'IPR013026'}	WP_000812983.1 heme lyase NrfEFG subunit NrfG [Escherichia coli]		1674
562.22436.con.0021_4|562.22436	COG0286	V	Cluster 4235	27.0	False	False				False	protein:proph:172153 Length: 505 # NCBI annotation: type I restriction-modification system, M subunit # Family: family:all:384 # MgeID: mge:2398 # MgeName: prophinder:44778 # Cross-refs: genbank:acc:YP_389917;interpro:IPR002052;interpro:IPR002296;interpro:IPR004546;genbank:gi:78358468;genbank:GeneID:3758406	True		False	{'GO:0032259', 'GO:0003676', 'GO:0008170', 'GO:0006306', 'GO:0008168', 'GO:0003677'}		{'GO:0003676', 'GO:0008170', 'GO:0003677', 'GO:0008168'}	{'GO:0032259', 'GO:0006306'}	{'MetaCyc: PWY-5301', 'MetaCyc: PWY-6027', 'MetaCyc: PWY-7091', 'MetaCyc: PWY-8007', 'Reactome: R-BTA-71288', 'Reactome: R-DRE-71288', 'MetaCyc: PWY-7161', 'Reactome: R-HSA-9684325', 'MetaCyc: PWY-7407', 'MetaCyc: PWY-6659', 'MetaCyc: PWY-5818', 'MetaCyc: PWY-5110', 'MetaCyc: PWY-7701', 'MetaCyc: PWY-7693', 'MetaCyc: PWY-6906', 'MetaCyc: PWY-7397', 'MetaCyc: PWY-7605', 'Reactome: R-HSA-197264', '…	{'IPR003356', 'IPR002052', 'IPR029063', 'IPR022749', 'IPR038333'}	WP_000172639.1 SAM-dependent DNA methyltransferase [Escherichia coli]		1675
562.22436.con.0021_7|562.22436	COG0610	V	Cluster 642	35.0	False	False				False	protein:proph:172148 Length: 984 # NCBI annotation: HsdR family type I site-specific deoxyribonuclease # Family: family:all:853 # MgeID: mge:2398 # MgeName: prophinder:44778 # Cross-refs: genbank:acc:YP_389912;interpro:IPR004473;interpro:IPR011545;ddegorf3427p:REBASE;genbank:gi:78358463;genbank:GeneID:3758401	True		False	{'GO:0005524', 'GO:0006304', 'GO:0004519', 'GO:0009307', 'GO:0009035', 'GO:0003677'}		{'GO:0004519', 'GO:0005524', 'GO:0009035', 'GO:0003677'}	{'GO:0009307', 'GO:0006304'}	{'Reactome: R-HSA-8856828', 'Reactome: R-DME-2179392', 'MetaCyc: PWY-6027', 'Reactome: R-GGA-68689', 'Reactome: R-RNO-5696400', 'Reactome: R-BTA-73817', 'Reactome: R-MMU-381042', 'Reactome: R-GGA-2871796', 'Reactome: R-HSA-5693565', 'Reactome: R-DME-5610780', 'Reactome: R-DDI-5358565', 'Reactome: R-HSA-9684325', 'MetaCyc: PWY-3841', 'Reactome: R-HSA-1660514', 'MetaCyc: PWY-6659', 'Reactome: R-HSA…	{'IPR040980', 'IPR004473', 'IPR014001', 'IPR027417', 'IPR007409'}	WP_000481471.1 HsdR family type I site-specific deoxyribonuclease [Escherichia coli]		1676
562.22436.con.0021_8|562.22436	COG0286	V	Cluster 2478	27.0	False	False				False	protein:proph:172153 Length: 505 # NCBI annotation: type I restriction-modification system, M subunit # Family: family:all:384 # MgeID: mge:2398 # MgeName: prophinder:44778 # Cross-refs: genbank:acc:YP_389917;interpro:IPR002052;interpro:IPR002296;interpro:IPR004546;genbank:gi:78358468;genbank:GeneID:3758406	True		False	{'GO:0032259', 'GO:0003676', 'GO:0006304', 'GO:0008170', 'GO:0006306', 'GO:0008168', 'GO:0003677'}		{'GO:0003676', 'GO:0008170', 'GO:0003677', 'GO:0008168'}	{'GO:0032259', 'GO:0006304', 'GO:0006306'}	{'MetaCyc: PWY-5301', 'MetaCyc: PWY-6027', 'MetaCyc: PWY-7091', 'MetaCyc: PWY-8007', 'Reactome: R-BTA-71288', 'Reactome: R-DRE-71288', 'MetaCyc: PWY-7161', 'Reactome: R-HSA-9684325', 'MetaCyc: PWY-7407', 'MetaCyc: PWY-6659', 'MetaCyc: PWY-5818', 'MetaCyc: PWY-5110', 'MetaCyc: PWY-7701', 'MetaCyc: PWY-7693', 'MetaCyc: PWY-6906', 'MetaCyc: PWY-7397', 'MetaCyc: PWY-7605', 'Reactome: R-HSA-197264', '…	{'IPR003356', 'IPR002052', 'IPR029063', 'IPR000055'}	WP_001097956.1 hypothetical protein [Escherichia coli]	True	1677
562.22436.con.0021_9|562.22436	COG3950	R	Cluster 3058	27.0	False	False				False		False		False	{'GO:0005524', 'GO:0016887'}		{'GO:0005524', 'GO:0016887'}		{'Reactome: R-HSA-8856828', 'Reactome: R-DME-2179392', 'MetaCyc: PWY-6027', 'Reactome: R-GGA-68689', 'Reactome: R-RNO-5696400', 'Reactome: R-BTA-73817', 'Reactome: R-MMU-381042', 'Reactome: R-GGA-2871796', 'Reactome: R-HSA-5693565', 'Reactome: R-DME-5610780', 'Reactome: R-DDI-5358565', 'Reactome: R-HSA-9684325', 'MetaCyc: PWY-3841', 'Reactome: R-HSA-1660514', 'MetaCyc: PWY-6659', 'Reactome: R-HSA…	{'IPR027417', 'IPR003959'}	WP_000404910.1 ATP-binding protein [Escherichia coli]		1678
562.22436.con.0038_2|562.22436			Cluster 7040	204.0	False	False				False	protein:plasmid:137095 Length: 404 # NCBI annotation: hypothetical protein # Family: family:all:3612 # MgeID: mge:1948 # MgeName: pLEW517 # Cross-refs: genbank:gi:133756233;genbank:GeneID:4924708	True		False	{'GO:0009307', 'GO:0009036', 'GO:0003677'}		{'GO:0009036', 'GO:0003677'}	{'GO:0009307'}	{'Reactome: R-SPO-5693568', 'Reactome: R-DDI-5696395', 'Reactome: R-DME-6782135', 'Reactome: R-HSA-9609690', 'Reactome: R-XTR-6783310', 'Reactome: R-BTA-5696395', 'Reactome: R-BTA-5696400', 'Reactome: R-DME-5696395', 'Reactome: R-RNO-6783310', 'Reactome: R-BTA-6783310', 'Reactome: R-DRE-5693568', 'Reactome: R-HSA-5696395', 'Reactome: R-XTR-5693568', 'Reactome: R-HSA-5696400', 'Reactome: R-MMU-569…	{'IPR015109', 'IPR038365', 'IPR015300', 'IPR011335', 'IPR023372'}	WP_001532073.1 MULTISPECIES: type-2 restriction enzyme EcoRII [Enterobacteriaceae]		1679
562.22436.con.0038_8|562.22436			Cluster 27142	67.0	False	False				False	protein:plasmid:151008 Length: 125 # NCBI annotation: hypothetical protein # Family: family:all:6082 # MgeID: mge:977 # MgeName: pMUR050 # Cross-refs: genbank:gi:113706768;genbank:GeneID:3861265	True		False							WP_000504250.1 MULTISPECIES: hypothetical protein [Enterobacteriaceae]	True	1680
562.22437.con.0041_11|562.22437	COG2320	S	Cluster 33246	35.0	False	False				False	protein:plasmid:117769 Length: 81 # NCBI annotation: hypothetical protein # Family: family:all:4354 # MgeID: mge:946 # MgeName: pSC138 # Cross-refs: genbank:gi:60115561;genbank:GeneID:3283416	True		False					{'Reactome: R-RNO-5693571', 'MetaCyc: PWY-8176', 'Reactome: R-RNO-5689880', 'KEGG: 00230', 'MetaCyc: PWY-7878', 'Reactome: R-SPO-429947', 'Reactome: R-HSA-5649702', 'Reactome: R-DRE-110362', 'MetaCyc: PWY-6575', 'Reactome: R-MMU-72163', 'MetaCyc: PWY-6368', 'Reactome: R-DRE-110381', 'Reactome: R-HSA-110373', 'MetaCyc: PWY-6720', 'MetaCyc: PWY-8052', 'Reactome: R-HSA-909733', 'Reactome: R-MMU-8983…	{'IPR007344', 'IPR043519'}	WP_001354008.1 MULTISPECIES: hypothetical protein [Enterobacterales]	True	1681
562.22439.con.0002_37|562.22439	COG2244	M	Cluster 6328	434.0	False	False				False		False		False	{'GO:0016020'}	{'GO:0016020'}				{'IPR002797'}	WP_001305149.1 MULTISPECIES: flippase [Enterobacteriaceae]		1682
562.22439.con.0003_248|562.22439			Cluster 34285	1024.0	False	False				False		False		False							WP_000198577.1 hypothetical protein [Escherichia coli]	True	1683
562.22441.con.0063_5|562.22441			Cluster 9684	35.0	False	False				False	protein:plasmid:16080 Length: 346 # NCBI annotation: hypothetical protein # Family: family:all:5935 # MgeID: mge:372 # MgeName: pOSAK1 # Cross-refs: genbank:acc:NP_052606;genbank:gi:10955265;genbank:GeneID:1789663	True		False	{'GO:0004521'}		{'GO:0004521'}			{'IPR043994', 'IPR031845'}	EQQ61620.1 hypothetical protein G770_05064, partial [Escherichia coli HVH 109 (4-6977162)]	True	1684
562.22441.con.0063_6|562.22441			Cluster 27004	35.0	False	False				False	protein:plasmid:16079 Length: 126 # NCBI annotation: hypothetical protein # Family: family:all:5936 # MgeID: mge:372 # MgeName: pOSAK1 # Cross-refs: genbank:acc:NP_052605;genbank:gi:10955264;genbank:GeneID:1789661	True		False						{'IPR031834'}	WP_000710826.1 MULTISPECIES: antitoxin LsoB [Bacteria]		1685
562.22442.con.0006_23|562.22442			Cluster 40219	21.0	False	False				False		False		False							ELC16880.1 hypothetical protein WCO_02598 [Escherichia sp. KTE11]	True	1686
562.22442.con.0051_15|562.22442			Cluster 33746	38.0	False	False				False	protein:plasmid:19643 Length: 78 # NCBI annotation: hypothetical protein # Family: family:all:5821 # MgeID: mge:518 # MgeName: R100 # Cross-refs: genbank:acc:NP_052906;genbank:gi:9507575;genbank:GeneID:1263390	True		False							WP_001333088.1 MULTISPECIES: hypothetical protein [Enterobacteriaceae]	True	1687
562.22442.con.0051_16|562.22442			Cluster 39940	8.0	False	False				False	protein:vir:101400 Length: 167 # NCBI annotation: InsB # Family: family:all:51 # MgeID: mge:1512 # MgeName: P1 # Cross-refs: genbank:acc:YP_006487;genbank:gi:46401642;genbank:GeneID:2777463	True		False	{'GO:0004803', 'GO:0006313', 'GO:0003677'}		{'GO:0004803', 'GO:0003677'}	{'GO:0006313'}		{'IPR005063'}	WP_071557810.1 MULTISPECIES: hypothetical protein [Enterobacterales]	True	1688
562.22442.con.0095_2|562.22442			Cluster 39941	22.0	False	False				False		False		False							EHW41788.1 hypothetical protein ECDEC9A_1152 [Escherichia coli DEC9A]	True	1689
562.22443.con.0060_9|562.22443	COG0262	H	Cluster 22992	246.0	False	True	dfrA14	3002859.0		False	protein:plasmid:24218 Length: 160 # NCBI annotation: putative dihydrofolate reductase # Family: family:all:471 # MgeID: mge:587 # MgeName: pHCM1 # Cross-refs: genbank:acc:NP_569370;genbank:gi:18466562;genbank:GeneID:1251383	True	gb|ACI32877.1|dfrA14 [Escherichia coli]	True	{'GO:0055114', 'GO:0046654', 'GO:0006545', 'GO:0050661', 'GO:0004146'}		{'GO:0004146', 'GO:0050661'}	{'GO:0006545', 'GO:0046654', 'GO:0055114'}	{'MetaCyc: PWY-7210', 'Reactome: R-RNO-196757', 'KEGG: 00790', 'MetaCyc: PWY-3841', 'Reactome: R-HSA-69205', 'Reactome: R-HSA-196757', 'MetaCyc: PWY-7187', 'KEGG: 00240', 'MetaCyc: PWY-7198', 'Reactome: R-SPO-196757', 'KEGG: 00740', 'MetaCyc: PWY-7184', 'Reactome: R-MMU-196757', 'Reactome: R-DME-196757', 'Reactome: R-CEL-196757', 'KEGG: 00670', 'KEGG: 01100', 'MetaCyc: PWY-6167', 'MetaCyc: PWY-53…	{'IPR024072', 'IPR001796', 'IPR012259', 'IPR017925'}	WP_015058990.1 MULTISPECIES: trimethoprim-resistant dihydrofolate reductase DfrA [Gammaproteobacteria]		1690
562.22444.con.0032_2|562.22444	COG3344	L	Cluster 5083	649.0	False	False				False	protein:plasmid:117440 Length: 462 # NCBI annotation: hypothetical protein # Family: family:all:85 # MgeID: mge:818 # MgeName: pO86A1 # Cross-refs: genbank:gi:116006806;genbank:GeneID:4364235	True		False	{'GO:0006278', 'GO:0003723', 'GO:0003964'}		{'GO:0003723', 'GO:0003964'}	{'GO:0006278'}	{'MetaCyc: PWY-5301', 'MetaCyc: PWY-6027', 'Reactome: R-RNO-5696400', 'MetaCyc: PWY-7161', 'Reactome: R-HSA-9684325', 'MetaCyc: PWY-7407', 'MetaCyc: PWY-7693', 'Reactome: R-MMU-174417', 'Reactome: R-HSA-110312', 'MetaCyc: PWY-7694', 'MetaCyc: PWY-5994', 'MetaCyc: PWY-7705', 'Reactome: R-HSA-162594', 'MetaCyc: PWY-8035', 'MetaCyc: PWY-8100', 'Reactome: R-CEL-69091', 'MetaCyc: PWY-7448', 'MetaCyc: …	{'IPR000477', 'IPR030931', 'IPR000123', 'IPR013597', 'IPR043502'}	WP_001608718.1 group II intron reverse transcriptase/maturase [Escherichia coli]		1691
562.22445.con.0044_2|562.22445			Cluster 18225	532.0	False	False				False		False		False					{'MetaCyc: PWY-6737', 'Reactome: R-SSC-5653890', 'MetaCyc: PWY-7056', 'Reactome: R-RNO-6803157', 'Reactome: R-MMU-6803157', 'MetaCyc: PWY-7450', 'MetaCyc: PWY-6385', 'MetaCyc: PWY-6855', 'MetaCyc: PWY-7091', 'Reactome: R-MMU-5653890', 'Reactome: R-BTA-6798695', 'MetaCyc: PWY-7822', 'MetaCyc: PWY-7134', 'MetaCyc: PWY-7445', 'MetaCyc: PWY-5800', 'MetaCyc: PWY-6527', 'MetaCyc: PWY-6749', 'MetaCyc: P…	{'IPR008258', 'IPR023346'}	WP_000767040.1 hypothetical protein [Escherichia coli]	True	1692
562.22445.con.0067_2|562.22445			Cluster 33942	14.0	False	False				False	protein:plasmid:158830 Length: 92 # NCBI annotation: hypothetical protein # Family: family:all:20962 # MgeID: mge:738 # MgeName: pU302L # Cross-refs: genbank:gi:58383303;genbank:GeneID:3259829	True		False							WP_001330845.1 MULTISPECIES: hypothetical protein [Enterobacteriaceae]	True	1693
562.22445.con.0067_3|562.22445			Cluster 36513	14.0	False	False				False		False		False							WP_000951934.1 MULTISPECIES: hypothetical protein [Bacteria]	True	1694
562.22445.con.0067_6|562.22445			Cluster 38676	14.0	False	False				False		False		False							WP_014342212.1 MULTISPECIES: hypothetical protein [Gammaproteobacteria]	True	1695
562.22446.con.0032_9|562.22446			Cluster 24762	86.0	False	False				False		False		False							WP_001557243.1 hypothetical protein [Escherichia coli]	True	1696
562.22447.con.0004_119|562.22447	COG0701	R	Cluster 2998	2931.0	True	False				False		False		False	{'GO:0016620', 'GO:0055114', 'GO:0051287'}		{'GO:0016620', 'GO:0051287'}	{'GO:0055114'}	{'MetaCyc: PWY-6027', 'MetaCyc: PWY-6664', 'MetaCyc: PWY-7862', 'MetaCyc: PWY-3841', 'MetaCyc: PWY-6659', 'MetaCyc: PWY-7693', 'Reactome: R-HSA-77111', 'MetaCyc: PWY-7605', 'Reactome: R-DDI-70171', 'MetaCyc: PWY-6654', 'MetaCyc: PWY-6160', 'MetaCyc: PWY-7341', 'MetaCyc: PWY-5994', 'MetaCyc: PWY-7057', 'MetaCyc: PWY-8035', 'KEGG: 00472', 'Reactome: R-RNO-77305', 'MetaCyc: PWY-8034', 'MetaCyc: PWY-…	{'IPR036291', 'IPR000534', 'IPR016040', 'IPR005524'}	SOQ66818.1 putative permease [Escherichia coli]		1697
562.22449.con.0001_181|562.22449			Cluster 25924	2402.0	False	False				False		False		False	{'GO:0097351', 'GO:0001558', 'GO:0003677', 'GO:0003700'}		{'GO:0097351', 'GO:0003677', 'GO:0003700'}	{'GO:0001558'}		{'IPR031848', 'IPR007159', 'IPR037914'}	EFK23732.1 toxin-antitoxin system, antitoxin component, AbrB family [Escherichia coli MS 187-1]		1698
562.22449.con.0011_43|562.22449	COG4812	E	Cluster 14257	2905.0	True	False				False		False		False	{'GO:0006580', 'GO:0009236', 'GO:0005524', 'GO:0008817'}		{'GO:0005524', 'GO:0008817'}	{'GO:0006580', 'GO:0009236'}	{'MetaCyc: PWY-8080', 'MetaCyc: PWY-7543', 'MetaCyc: PWY-8084', 'MetaCyc: PWY-5815', 'MetaCyc: PWY-7599', 'MetaCyc: PWY-7407', 'MetaCyc: PWY-6659', 'MetaCyc: PWY-6936', 'MetaCyc: PWY-4681', 'MetaCyc: PWY-5817', 'MetaCyc: PWY-7906', 'MetaCyc: PWY-6403', 'MetaCyc: PWY-7603', 'MetaCyc: PWY-7605', 'MetaCyc: PWY-4502', 'MetaCyc: PWY-6262', 'MetaCyc: PWY-7998', 'Reactome: R-HSA-196741', 'MetaCyc: PWY-7…	{'IPR036451', 'IPR016030', 'IPR009194'}	WP_000651266.1 MULTISPECIES: ethanolamine utilization cob(I)yrinic acid a,c-diamide adenosyltransferase EutT [Enterobacteriaceae]		1699
562.22449.con.0036_34|562.22449	COG1609	K	Cluster 4958	89.0	False	False				False	protein:proph:163928 Length: 427 # NCBI annotation: inner membrane metabolite transport protein ydfJ # Family: family:all:10 # MgeID: mge:2159 # MgeName: prophinder:44213 # Cross-refs: genbank:acc:YP_001462835;genbank:gi:157155262;genbank:GeneID:5587644	True		False	{'GO:0016021', 'GO:0055085', 'GO:0022857'}	{'GO:0016021'}	{'GO:0022857'}	{'GO:0055085'}	{'Reactome: R-RNO-210991', 'Reactome: R-MMU-159418', 'Reactome: R-HSA-8856828', 'Reactome: R-XTR-352230', 'Reactome: R-MMU-5653890', 'Reactome: R-RNO-196757', 'MetaCyc: PWY-6369', 'Reactome: R-HSA-352230', 'Reactome: R-MMU-196819', 'Reactome: R-HSA-442660', 'Reactome: R-HSA-5662702', 'Reactome: R-DME-422356', 'Reactome: R-DME-196836', 'Reactome: R-CEL-428643', 'Reactome: R-HSA-5619070', 'Reactome…	{'IPR005828', 'IPR036259', 'IPR020846'}	WP_021547669.1 MFS transporter [Escherichia coli]		1700
562.22449.con.0079_10|562.22449	COG0463	M	Cluster 16186	24.0	False	False				False	protein:plasmid:17305 Length: 316 # NCBI annotation: EpsG # Family: family:all:360 # MgeID: mge:448 # MgeName: pNZ4000 # Cross-refs: genbank:acc:NP_053027;genbank:gi:9507679;genbank:GeneID:1113509	True		False					{'Reactome: R-CEL-913709', 'MetaCyc: PWY-6664', 'MetaCyc: PWY-5800', 'Reactome: R-MMU-4085001', 'MetaCyc: PWY-5818', 'MetaCyc: PWY-7623', 'MetaCyc: PWY-8113', 'MetaCyc: PWY-6051', 'Reactome: R-MMU-190372', 'MetaCyc: PWY-6720', 'Reactome: R-CEL-964739', 'Reactome: R-DME-2022928', 'MetaCyc: PWY-2021', 'MetaCyc: PWY-6687', 'Reactome: R-HSA-2142850', 'MetaCyc: PWY-7487', 'MetaCyc: PWY-7191', 'KEGG: 0…	{'IPR001173', 'IPR029044'}	WP_001322701.1 glycosyltransferase [Escherichia coli]		1706
562.22449.con.0079_11|562.22449	COG2244	M	Cluster 6739	25.0	False	False				False	protein:plasmid:17301 Length: 472 # NCBI annotation: EpsK # Family: family:all:3647 # MgeID: mge:448 # MgeName: pNZ4000 # Cross-refs: genbank:acc:NP_053023;genbank:gi:9507683;genbank:GeneID:1113527	True		False	{'GO:0016020'}	{'GO:0016020'}				{'IPR002797'}	WP_000916634.1 O11 family O-antigen flippase [Escherichia coli]		1707
562.22449.con.0079_1|562.22449	COG0463	M	Cluster 15695	24.0	False	False				False	protein:proph:160431 Length: 325 # NCBI annotation: hypothetical protein # Family: family:all:360 # MgeID: mge:2065 # MgeName: prophinder:43815 # Cross-refs: genbank:acc:NP_930247;genbank:gi:37526903;genbank:GeneID:2803024	True		False					{'Reactome: R-CEL-913709', 'MetaCyc: PWY-6664', 'MetaCyc: PWY-5800', 'Reactome: R-MMU-4085001', 'MetaCyc: PWY-5818', 'MetaCyc: PWY-7623', 'MetaCyc: PWY-8113', 'MetaCyc: PWY-6051', 'Reactome: R-MMU-190372', 'MetaCyc: PWY-6720', 'Reactome: R-CEL-964739', 'Reactome: R-DME-2022928', 'MetaCyc: PWY-2021', 'MetaCyc: PWY-6687', 'Reactome: R-HSA-2142850', 'MetaCyc: PWY-7487', 'MetaCyc: PWY-7191', 'KEGG: 0…	{'IPR001173', 'IPR029044'}	BAQ01605.1 putative glycosyltransferase [Escherichia coli]		1701
562.22449.con.0079_6|562.22449	COG0438	M	Cluster 10313	25.0	False	False				False	protein:plasmid:27646 Length: 402 # NCBI annotation: putative glycosyltransferase protein # Family: family:all:4326 # MgeID: mge:608 # MgeName: pSymB # Cross-refs: genbank:acc:NP_437197;genbank:gi:16264405;genbank:GeneID:1236988	True		False	{'GO:0016757'}		{'GO:0016757'}		{'MetaCyc: PWY-7463', 'MetaCyc: PWY-2902', 'MetaCyc: PWY-7145', 'MetaCyc: PWY-5926', 'KEGG: 00540', 'MetaCyc: PWY-5800', 'Reactome: R-HSA-4549380', 'MetaCyc: PWY-7623', 'MetaCyc: PWY-7151', 'MetaCyc: PWY-5875', 'MetaCyc: PWY-6051', 'MetaCyc: PWY-5094', 'Reactome: R-HSA-4551295', 'MetaCyc: PWY-6239', 'MetaCyc: PWY-5379', 'MetaCyc: PWY-2723', 'KEGG: 00524', 'MetaCyc: PWY-7922', 'MetaCyc: PWY-7238',…	{'IPR001296', 'IPR028098'}	WP_000699786.1 glycosyltransferase family 1 protein [Escherichia coli]		1702
562.22449.con.0079_7|562.22449	COG1087	M	Cluster 10141	25.0	False	False				False	protein:plasmid:22115 Length: 341 # NCBI annotation: PROBABLE UDP-GLUCOSE 4-EPIMERASE PROTEIN # Family: family:all:79 # MgeID: mge:570 # MgeName: pGMI1000MP # Cross-refs: genbank:acc:NP_522662;genbank:gi:17549322;genbank:GeneID:1223413	True		False	{'GO:0006012', 'GO:0003978'}		{'GO:0003978'}	{'GO:0006012'}	{'MetaCyc: PWY-6027', 'MetaCyc: PWY-6664', 'MetaCyc: PWY-7862', 'MetaCyc: PWY-3841', 'MetaCyc: PWY-6659', 'MetaCyc: PWY-7693', 'Reactome: R-HSA-77111', 'MetaCyc: PWY-7605', 'Reactome: R-DDI-70171', 'MetaCyc: PWY-6654', 'MetaCyc: PWY-6160', 'MetaCyc: PWY-7341', 'MetaCyc: PWY-5994', 'MetaCyc: PWY-7057', 'MetaCyc: PWY-8035', 'KEGG: 00472', 'Reactome: R-RNO-77305', 'MetaCyc: PWY-8034', 'MetaCyc: PWY-…	{'IPR005886', 'IPR036291', 'IPR016040'}	WP_000026025.1 UDP-glucose 4-epimerase GalE [Escherichia coli]		1703
562.22449.con.0079_8|562.22449	COG0438	M	Cluster 9230	25.0	False	False				False	protein:plasmid:128785 Length: 372 # NCBI annotation: putative alpha(1,3)rhamnosyltransferase EpsG # Family: family:all:94 # MgeID: mge:832 # MgeName: 3 # Cross-refs: genbank:gi:94972401;genbank:GeneID:4073511	True		False	{'GO:0016757'}		{'GO:0016757'}		{'MetaCyc: PWY-7463', 'MetaCyc: PWY-2902', 'MetaCyc: PWY-7145', 'MetaCyc: PWY-5926', 'KEGG: 00540', 'MetaCyc: PWY-5800', 'Reactome: R-HSA-4549380', 'MetaCyc: PWY-7623', 'MetaCyc: PWY-7151', 'MetaCyc: PWY-5875', 'MetaCyc: PWY-6051', 'MetaCyc: PWY-5094', 'Reactome: R-HSA-4551295', 'MetaCyc: PWY-6239', 'MetaCyc: PWY-5379', 'MetaCyc: PWY-2723', 'KEGG: 00524', 'MetaCyc: PWY-7922', 'MetaCyc: PWY-7238',…	{'IPR001296'}	WP_000022058.1 glycosyltransferase [Escherichia coli]		1704
562.22449.con.0079_9|562.22449			Cluster 6738	24.0	False	False				False		False		False							WP_000610526.1 hypothetical protein [Escherichia coli]	True	1705
562.22452.con.0034_2|562.22452	COG3090	G	Cluster 22471	515.0	False	False				False	protein:plasmid:131650 Length: 159 # NCBI annotation: hypothetical protein # Family: family:all:265 # MgeID: mge:1936 # MgeName: pRSPA01 # Cross-refs: genbank:gi:146279370;genbank:GeneID:5085833	True		False						{'IPR007387'}	WP_012602231.1 TRAP transporter small permease [Escherichia coli]		1708
562.22453.con.0005_1|562.22453	COG4521	P	Cluster 8317	2928.0	True	False				False	protein:plasmid:22397 Length: 334 # NCBI annotation: PUTATIVE ALKANESULFONATES BINDING PROTEIN PRECURSOR # Family: family:all:291 # MgeID: mge:570 # MgeName: pGMI1000MP # Cross-refs: genbank:acc:NP_522942;genbank:gi:17549602;genbank:GeneID:1223695	True		False	{'GO:0016020', 'GO:0042626'}	{'GO:0016020'}	{'GO:0042626'}		{'KEGG: 01120', 'Reactome: R-CEL-438066', 'MetaCyc: PWY-7432', 'KEGG: 00624', 'KEGG: 01100', 'Reactome: R-CEL-5694530', 'Reactome: R-CEL-399710', 'MetaCyc: PWY-3462', 'Reactome: R-CEL-204005', 'KEGG: 00400', 'KEGG: 01110'}	{'IPR010067', 'IPR015168', 'IPR001638'}	WP_001244308.1 MULTISPECIES: sulfonate ABC transporter substrate-binding protein [Proteobacteria]		1709
562.22453.con.0024_25|562.22453	COG0412	Q	Cluster 12607	2930.0	True	False				False	protein:plasmid:124220 Length: 295 # NCBI annotation: putative dienelactone hydrolase family protein # Family: family:all:1011 # MgeID: mge:741 # MgeName: pRL11 # Cross-refs: genbank:gi:116255685;goa:Q1M5Q2;uniprot:Q1M5Q2;genbank:GeneID:4404744	True		False	{'GO:0016787'}		{'GO:0016787'}		{'Reactome: R-MMU-159418', 'MetaCyc: PWY-5301', 'Reactome: R-DDI-112311', 'MetaCyc: PWY-6027', 'MetaCyc: PWY-7091', 'MetaCyc: PWY-7420', 'MetaCyc: PWY-7161', 'Reactome: R-RNO-418346', 'MetaCyc: PWY-3841', 'Reactome: R-HSA-211945', 'MetaCyc: PWY-7407', 'MetaCyc: PWY-5800', 'MetaCyc: PWY-6659', 'Reactome: R-MMU-4085001', 'MetaCyc: PWY-5818', 'MetaCyc: PWY-7693', 'MetaCyc: PWY-7623', 'MetaCyc: PWY-6…	{'IPR002925', 'IPR029058'}	WP_000882370.1 dienelactone hydrolase family protein [Escherichia coli]		1710
562.22453.con.0054_20|562.22453			Cluster 239	36.0	False	False				False	protein:plasmid:24592 Length: 1329 # NCBI annotation: hypothetical protein # Family: family:all:271 # MgeID: mge:593 # MgeName: R27 # Cross-refs: genbank:acc:NP_058341;genbank:gi:10957317;genbank:GeneID:875053	True		False						{'IPR012931'}	WP_000386167.1 MULTISPECIES: conjugal transfer protein TraG [Enterobacteriaceae]		1712
562.22453.con.0054_22|562.22453			Cluster 20477	36.0	False	False				False	protein:plasmid:24298 Length: 171 # NCBI annotation: hypothetical protein # Family: family:all:126 # MgeID: mge:587 # MgeName: pHCM1 # Cross-refs: genbank:acc:NP_569445;genbank:gi:18466637;genbank:GeneID:1251264	True		False					{'MetaCyc: PWY-6737', 'Reactome: R-SSC-5653890', 'MetaCyc: PWY-7056', 'Reactome: R-RNO-6803157', 'Reactome: R-MMU-6803157', 'MetaCyc: PWY-7450', 'MetaCyc: PWY-6385', 'MetaCyc: PWY-6855', 'MetaCyc: PWY-7091', 'Reactome: R-MMU-5653890', 'Reactome: R-BTA-6798695', 'MetaCyc: PWY-7822', 'MetaCyc: PWY-7134', 'MetaCyc: PWY-7445', 'MetaCyc: PWY-5800', 'MetaCyc: PWY-6527', 'MetaCyc: PWY-6749', 'MetaCyc: P…	{'IPR023346'}	WP_000505025.1 hypothetical protein [Escherichia coli]	True	1713
562.22453.con.0054_5|562.22453			Cluster 33944	13.0	False	False				False	protein:plasmid:24576 Length: 77 # NCBI annotation: hypothetical protein # Family: family:all:9879 # MgeID: mge:593 # MgeName: R27 # Cross-refs: genbank:acc:NP_058325;genbank:gi:10957301;genbank:GeneID:875075	True		False							WP_000925846.1 MULTISPECIES: hypothetical protein [Enterobacteriaceae]	True	1711
562.22453.con.0055_2|562.22453			Cluster 12212	35.0	False	False				False	protein:plasmid:24192 Length: 302 # NCBI annotation: hypothetical protein # Family: family:all:6255 # MgeID: mge:587 # MgeName: pHCM1 # Cross-refs: genbank:acc:NP_569343;genbank:gi:18466535;genbank:GeneID:1251151	True		False							WP_001198597.1 MULTISPECIES: hypothetical protein [Enterobacteriaceae]	True	1714
562.22453.con.0078_5|562.22453			Cluster 10314	36.0	False	False				False	protein:plasmid:24150 Length: 335 # NCBI annotation: putative plasmid partition protein # Family: family:all:172 # MgeID: mge:587 # MgeName: pHCM1 # Cross-refs: genbank:acc:NP_569301;genbank:gi:18466493;genbank:GeneID:1251196	True		False					{'MetaCyc: PWY-7706', 'Reactome: R-DDI-6798695', 'KEGG: 00997', 'KEGG: 00270', 'KEGG: 01100', 'MetaCyc: PWY-8008', 'MetaCyc: PWY-8009', 'MetaCyc: PWY-7694', 'KEGG: 01110'}	{'IPR014884', 'IPR003115', 'IPR036086'}	WP_001278833.1 MULTISPECIES: peptide transporter [Enterobacteriaceae]		1715
562.22453.con.0078_6|562.22453			Cluster 26452	34.0	False	False				False	protein:plasmid:24151 Length: 130 # NCBI annotation: putative periplasmic protein # Family: family:all:6293 # MgeID: mge:587 # MgeName: pHCM1 # Cross-refs: genbank:acc:NP_569302;genbank:gi:18466494;genbank:GeneID:1251194	True		False							WP_000875157.1 MULTISPECIES: hypothetical protein [Enterobacteriaceae]	True	1716
562.22453.con.0078_8|562.22453			Cluster 13631	12.0	False	False				False	protein:plasmid:24153 Length: 279 # NCBI annotation: putative periplasmic protein # Family: family:all:6239 # MgeID: mge:587 # MgeName: pHCM1 # Cross-refs: genbank:acc:NP_569304;genbank:gi:18466496;genbank:GeneID:1251192	True		False							WP_000915491.1 MULTISPECIES: hypothetical protein [Enterobacteriaceae]	True	1717
562.22453.con.0091_3|562.22453			Cluster 36335	20.0	False	False				False		False		False							WP_000227645.1 MULTISPECIES: hypothetical protein [Enterobacterales]	True	1718
562.22453.con.0091_4|562.22453			Cluster 28884	21.0	False	False				False		False		False							WP_001515496.1 MULTISPECIES: hypothetical protein [Enterobacteriaceae]	True	1719
562.22453.con.0095_1|562.22453			Cluster 26314	34.0	False	False				False	protein:plasmid:24140 Length: 116 # NCBI annotation: putative plasmid transfer protein # Family: family:all:6290 # MgeID: mge:587 # MgeName: pHCM1 # Cross-refs: genbank:acc:NP_569291;genbank:gi:18466483;genbank:GeneID:1251206	True		False	{'GO:0000746', 'GO:0019867'}	{'GO:0019867'}		{'GO:0000746'}		{'IPR009838'}	WP_097455285.1 plasmid transfer protein [Escherichia coli]		1720
562.22453.con.0095_5|562.22453			Cluster 5341	34.0	False	False				False	protein:plasmid:24144 Length: 452 # NCBI annotation: putative plasmid transfer protein # Family: family:all:321 # MgeID: mge:587 # MgeName: pHCM1 # Cross-refs: genbank:acc:NP_569295;genbank:gi:18466487;genbank:GeneID:1251202	True		False						{'IPR005498'}	WP_000351839.1 MULTISPECIES: hypothetical protein [Enterobacteriaceae]	True	1721
562.22453.con.0108_4|562.22453	COG3436	L	Cluster 20293	20.0	False	False				False	protein:proph:185133 Length: 381 # NCBI annotation: transposase IS66 # Family: family:all:39 # MgeID: mge:2764 # MgeName: prophinder:46415 # Cross-refs: genbank:acc:YP_866499;interpro:IPR004291;genbank:gi:117925882;genbank:GeneID:4482221	True		False						{'IPR004291'}	WP_001515734.1 MULTISPECIES: hypothetical protein [Enterobacteriaceae]	True	1722
562.22453.con.0108_7|562.22453			Cluster 20294	13.0	False	False				False	protein:plasmid:149795 Length: 187 # NCBI annotation: hypothetical protein # Family: family:all:7917 # MgeID: mge:1981 # MgeName: pKPN5 # Cross-refs: genbank:gi:152973813;genbank:GeneID:5343287	True		False	{'GO:0016491', 'GO:0020037'}		{'GO:0016491', 'GO:0020037'}		{'KEGG: 01057', 'MetaCyc: PWY-5872', 'KEGG: 01120', 'MetaCyc: PWY-6935', 'KEGG: 00940', 'MetaCyc: PWY-5826', 'MetaCyc: PWY-8179', 'KEGG: 00270', 'KEGG: 00261', 'MetaCyc: PWY-7445', 'MetaCyc: PWY-7710', 'MetaCyc: PWY-7485', 'MetaCyc: PWY-5461', 'MetaCyc: PWY-5302', 'MetaCyc: PWY-8166', 'MetaCyc: PWY-8158', 'MetaCyc: PWY-7742', 'MetaCyc: PWY-7483', 'MetaCyc: PWY-8085', 'MetaCyc: PWY-8012', 'MetaCyc…	{'IPR011008', 'IPR010644'}	WP_001097412.1 MULTISPECIES: hypothetical protein [Gammaproteobacteria]	True	1723
562.22453.con.0108_8|562.22453	COG3436	L	Cluster 8685	13.0	False	False				False	protein:plasmid:149794 Length: 367 # NCBI annotation: putative transposase # Family: family:all:39 # MgeID: mge:1981 # MgeName: pKPN5 # Cross-refs: genbank:gi:152973812;genbank:GeneID:5343286	True		False						{'IPR039552', 'IPR004291'}	ABR80621.1 putative transposase (plasmid) [Klebsiella pneumoniae subsp. pneumoniae MGH 78578]		1724
562.22453.con.0125_1|562.22453			Cluster 38984	32.0	False	False				False		False		False					{'Reactome: R-DME-6782135', 'KEGG: 00910', 'Reactome: R-HSA-2173795', 'Reactome: R-DME-5696395', 'Reactome: R-HSA-201451', 'KEGG: 00250', 'Reactome: R-GGA-353303', 'MetaCyc: PWY-6689', 'KEGG: 00270', 'MetaCyc: PWY-8067', 'Reactome: R-HSA-5696395', 'Reactome: R-MMU-201451', 'MetaCyc: PWY-6749', 'Reactome: R-HSA-5696400', 'Reactome: R-MMU-5696395', 'Reactome: R-HSA-6782135', 'Reactome: R-HSA-379716…	{'IPR009061', 'IPR001387', 'IPR010749'}	EFJ98139.1 hypothetical protein HMPREF9540_01780 [Escherichia coli MS 115-1]	True	1725
562.22453.con.0128_2|562.22453	COG3547	L	Cluster 9589	198.0	False	False				False	protein:plasmid:110382 Length: 340 # NCBI annotation: transposase # Family: family:all:27 # MgeID: mge:751 # MgeName: pMT # Cross-refs: genbank:gi:108793604;interpro:IPR002110;genbank:GeneID:4117982	True		False	{'GO:0004803', 'GO:0006313', 'GO:0003677'}		{'GO:0004803', 'GO:0003677'}	{'GO:0006313'}		{'IPR003346', 'IPR002525'}	ESB56385.1 putative transposase [Salmonella enterica subsp. enterica serovar Agona str. 557928]		1726
562.22454.con.0004_174|562.22454	COG2949	S	Cluster 16517	2927.0	True	False				False		False		False						{'IPR003848'}	ABE08970.1 hypothetical protein YgjQ [Escherichia coli UTI89]	True	1727
562.22455.con.0052_15|562.22455			Cluster 26050	86.0	False	False				False	protein:plasmid:151031 Length: 65 # NCBI annotation: hypothetical protein # Family: family:all:9529 # MgeID: mge:977 # MgeName: pMUR050 # Cross-refs: genbank:gi:113706764;genbank:GeneID:4246775	True		False						{'IPR036666', 'IPR007985'}	CSE55812.1 hemolysin expression-modulating protein [Shigella sonnei]		1728
562.22455.con.0085_2|562.22455			Cluster 41709	36.0	False	False				False		False		False									1729
562.22457.con.0075_4|562.22457			Cluster 32926	16.0	False	False				False	protein:vir:1321 Length: 348 # NCBI annotation: ORF348; homologous to eryA gene product in L07626 # Family: family:all:68 # MgeID: mge:27 # MgeName: If1 # Cross-refs: genbank:acc:NP_047360;genbank:gi:9630756;genbank:GeneID:1261859	True		False							ESD83171.1 hypothetical protein HMPREF1611_03293, partial [Escherichia coli 908573]	True	1730
562.22458.con.0050_12|562.22458	COG1403	V	Cluster 28175	23.0	False	False				False	protein:proph:176831 Length: 116 # NCBI annotation: HnhC # Family: family:all:42 # MgeID: mge:2520 # MgeName: prophinder:43595 # Cross-refs: genbank:acc:YP_853046;genbank:gi:117624133;genbank:GeneID:4493964	True		False	{'GO:0004519', 'GO:0003676'}		{'GO:0004519', 'GO:0003676'}		{'MetaCyc: PWY-7250'}	{'IPR003615', 'IPR002711'}	WP_001140102.1 MULTISPECIES: HNH endonuclease [Enterobacteriaceae]		1731
562.22458.con.0062_3|562.22458			Cluster 31164	25.0	False	False				False	protein:plasmid:123328 Length: 94 # NCBI annotation: hypothetical protein # Family: family:all:14740 # MgeID: mge:845 # MgeName: pAPEC-O2-ColV # Cross-refs: genbank:gi:84060869;genbank:GeneID:3853530	True		False							WP_001324034.1 MULTISPECIES: hypothetical protein [Enterobacteriaceae]	True	1732
562.22459.con.0004_79|562.22459	COG0003	P	Cluster 2962	28.0	False	False				False	protein:plasmid:24698 Length: 585 # NCBI annotation: hypothetical protein # Family: family:all:1381 # MgeID: mge:595 # MgeName: R64 # Cross-refs: genbank:acc:NP_863383;genbank:gi:32470159;genbank:GeneID:1446734	True		False	{'GO:0005524', 'GO:0071722', 'GO:0015446', 'GO:0016887'}		{'GO:0005524', 'GO:0015446', 'GO:0016887'}	{'GO:0071722'}	{'Reactome: R-HSA-8856828', 'Reactome: R-DME-2179392', 'MetaCyc: PWY-6027', 'Reactome: R-GGA-68689', 'Reactome: R-RNO-5696400', 'Reactome: R-BTA-73817', 'Reactome: R-MMU-381042', 'Reactome: R-GGA-2871796', 'Reactome: R-HSA-5693565', 'Reactome: R-DME-5610780', 'Reactome: R-DDI-5358565', 'Reactome: R-HSA-9684325', 'MetaCyc: PWY-3841', 'Reactome: R-HSA-1660514', 'MetaCyc: PWY-6659', 'Reactome: R-HSA…	{'IPR027417', 'IPR025723', 'IPR027541', 'IPR016300'}	WP_001057013.1 MULTISPECIES: arsenical pump-driving ATPase [Enterobacterales]		1733
562.22459.con.0005_63|562.22459			Cluster 18595	296.0	False	False				False	protein:vir:4480 Length: 189 # NCBI annotation: Endodeoxyribonuclease # Family: family:all:184 # MgeID: mge:96 # MgeName: ST64B # Cross-refs: genbank:acc:NP_700403;genbank:gi:23505474;genbank:GeneID:955681	True		False	{'GO:0003676'}		{'GO:0003676'}		{'Reactome: R-SCE-6791226', 'Reactome: R-GGA-6804115', 'Reactome: R-MMU-6804115', 'Reactome: R-SPO-429947', 'Reactome: R-HSA-5693616', 'MetaCyc: PWY-7961', 'Reactome: R-DME-110312', 'Reactome: R-MMU-69183', 'MetaCyc: PWY-7968', 'Reactome: R-HSA-3108214', 'Reactome: R-MMU-5656121', 'Reactome: R-SPO-674695', 'Reactome: R-MMU-69473', 'Reactome: R-RNO-5696400', 'Reactome: R-DME-203927', 'Reactome: R-…	{'IPR036397', 'IPR033390', 'IPR012337'}	STI28646.1 exonuclease [Escherichia coli]		1734
562.22460.con.0026_10|562.22460			Cluster 30861	7.0	False	False				False		False		False							EQT08213.1 hypothetical protein G825_00928 [Escherichia coli HVH 170 (4-3026949)]	True	1735
562.22461.con.0066_14|562.22461			Cluster 37220	58.0	False	False				False		False		False							EFK19276.1 hypothetical protein HMPREF9530_04142 [Escherichia coli MS 21-1]	True	1736
562.22461.con.0088_1|562.22461			Cluster 6106	58.0	False	False				False		False		False					{'Reactome: R-MMU-159418', 'MetaCyc: PWY-5301', 'Reactome: R-DDI-112311', 'MetaCyc: PWY-6027', 'MetaCyc: PWY-7091', 'MetaCyc: PWY-7420', 'MetaCyc: PWY-7161', 'Reactome: R-RNO-418346', 'MetaCyc: PWY-3841', 'Reactome: R-HSA-211945', 'MetaCyc: PWY-7407', 'MetaCyc: PWY-5800', 'MetaCyc: PWY-6659', 'Reactome: R-MMU-4085001', 'MetaCyc: PWY-5818', 'MetaCyc: PWY-7693', 'MetaCyc: PWY-7623', 'MetaCyc: PWY-6…	{'IPR029058'}	WP_001513441.1 hypothetical protein [Escherichia coli]	True	1737
562.22464.con.0002_161|562.22464			Cluster 21592	396.0	False	False				False		False		False							WP_001232123.1 hypothetical protein [Escherichia coli]	True	1739
562.22464.con.0002_1|562.22464			Cluster 41209	22.0	False	False				False		False		False									1738
562.22464.con.0063_8|562.22464			Cluster 27718	2912.0	True	False				False		False		False							WP_000984121.1 hypothetical protein [Escherichia coli]	True	1740
562.22465.con.0032_33|562.22465			Cluster 36870	22.0	False	False				False		False		False							KEK75431.1 putative bacteriophage protein [Escherichia coli 3-475-03_S3_C1]		1741
562.22465.con.0048_10|562.22465	COG0582	L	Cluster 6911	386.0	False	False				False	protein:proph:184923 Length: 393 # NCBI annotation: hypothetical protein # Family: family:all:2 # MgeID: mge:2758 # MgeName: prophinder:45968 # Cross-refs: genbank:acc:YP_001439090;interpro:IPR002104;interpro:IPR010998;interpro:IPR011010;interpro:IPR013762;genbank:gi:156935174;genbank:GeneID:5548870	True		False	{'GO:0015074', 'GO:0003677', 'GO:0006310'}		{'GO:0003677'}	{'GO:0015074', 'GO:0006310'}	{'MetaCyc: PWY-8179', 'MetaCyc: PWY-8117', 'MetaCyc: PWY-6749', 'Reactome: R-SPO-4615885', 'MetaCyc: PWY-7735', 'MetaCyc: PWY-7127', 'Reactome: R-CEL-4615885', 'Reactome: R-HSA-4615885', 'Reactome: R-DDI-4615885', 'MetaCyc: PWY-6626', 'Reactome: R-MMU-4615885', 'Reactome: R-RNO-4615885', 'MetaCyc: PWY-7419', 'MetaCyc: PWY-7904', 'Reactome: R-SCE-4615885', 'MetaCyc: PWY-6955', 'MetaCyc: PWY-7888',…	{'IPR013762', 'IPR010998', 'IPR002104', 'IPR044068', 'IPR038488', 'IPR025166', 'IPR011010'}	ANK02661.1 int [Escherichia coli O25b:H4]		1742
562.22466.con.0026_1|562.22466	COG0860	M	Cluster 5486	2931.0	True	False				False	protein:proph:159272 Length: 419 # NCBI annotation: N-acetylmuramoyl-L-alanine amidase # Family: family:all:185 # MgeID: mge:2023 # MgeName: prophinder:42923 # Cross-refs: genbank:acc:YP_455641;genbank:gi:85059939;genbank:GeneID:3866219	True		False	{'GO:0009253', 'GO:0008745'}		{'GO:0008745'}	{'GO:0009253'}	{'MetaCyc: PWY-6984', 'MetaCyc: PWY-7771', 'MetaCyc: PWY-7496', 'MetaCyc: PWY-7018', 'MetaCyc: PWY-7850', 'MetaCyc: PWY-7403', 'MetaCyc: PWY-7821', 'MetaCyc: PWY-6409', 'MetaCyc: PWY-7652', 'MetaCyc: PWY-7571', 'MetaCyc: PWY-5846', 'MetaCyc: PWY-5784', 'MetaCyc: PWY-7883', 'MetaCyc: PWY-7430', 'MetaCyc: PWY-6899', 'MetaCyc: PWY-5497', 'MetaCyc: PWY-1822'}	{'IPR021731', 'IPR002508'}	AAB40464.1 ORF_f447 [Escherichia coli str. K-12 substr. MG1655]		1743
562.22466.con.0033_1|562.22466			Cluster 36338	8.0	False	False				False		False		False	{'GO:0051495'}			{'GO:0051495'}		{'IPR009320', 'IPR038025'}	WP_001389100.1 MULTISPECIES: type IV toxin-antitoxin system YeeU family antitoxin [Enterobacteriaceae]		1744
562.22466.con.0041_10|562.22466	COG3193	S	Cluster 25007	12.0	False	False				False		False		False						{'IPR038084', 'IPR005624'}	WP_001610775.1 heme-binding protein [Escherichia coli]		1753
562.22466.con.0041_11|562.22466	COG1609	K	Cluster 9912	12.0	False	False				False	protein:plasmid:143464 Length: 349 # NCBI annotation: Alanine racemase # Family: family:all:30 # MgeID: mge:1969 # MgeName: pSMED01 # Cross-refs: genbank:gi:150376389;interpro:IPR000843;interpro:IPR001761;genbank:GeneID:5318008	True		False	{'GO:0006355', 'GO:0003677'}		{'GO:0003677'}	{'GO:0006355'}	{'KEGG: 00230', 'Reactome: R-HSA-418594', 'Reactome: R-RNO-416993', 'Reactome: R-MMU-399719', 'Reactome: R-CEL-500657', 'Reactome: R-RNO-500657', 'Reactome: R-RNO-204005', 'Reactome: R-DRE-451308', 'Reactome: R-DRE-451307', 'Reactome: R-HSA-1839117', 'Reactome: R-HSA-9620244', 'Reactome: R-CEL-5694530', 'Reactome: R-MMU-399710', 'Reactome: R-HSA-6785807', 'Reactome: R-DME-204005', 'MetaCyc: PWY-7…	{'IPR000843', 'IPR028082', 'IPR025997', 'IPR010982'}	WP_001610777.1 D-fructose-responsive transcription factor [Escherichia coli]		1754
562.22466.con.0041_13|562.22466			Cluster 21778	36.0	False	False				False		False		False							WP_077250883.1 hypothetical protein [Escherichia coli]	True	1755
562.22466.con.0041_27|562.22466			Cluster 24769	13.0	False	False				False		False		False							WP_049024717.1 MULTISPECIES: hypothetical protein [Enterobacteriaceae]	True	1756
562.22466.con.0041_28|562.22466	COG3344	L	Cluster 337	13.0	False	False				False		False		False					{'MetaCyc: PWY-8179', 'MetaCyc: PWY-8117', 'KEGG: 00983', 'Reactome: R-HSA-173107', 'MetaCyc: PWY-6749', 'KEGG: 00240', 'MetaCyc: PWY-7735', 'MetaCyc: PWY-7127', 'Reactome: R-MMU-171319', 'Reactome: R-HSA-175474', 'Reactome: R-HSA-164525', 'Reactome: R-RNO-171319', 'Reactome: R-HSA-171319', 'MetaCyc: PWY-6626', 'Reactome: R-HSA-162594', 'MetaCyc: PWY-7419', 'MetaCyc: PWY-7904', 'Reactome: R-HSA-1…	{'IPR000477'}	WP_049024715.1 RNA-directed DNA polymerase [Escherichia coli]		1757
562.22466.con.0041_2|562.22466			Cluster 30864	12.0	False	False				False		False		False							ELH23905.1 hypothetical protein A133_02877 [Escherichia coli KTE173]	True	1745
562.22466.con.0041_3|562.22466			Cluster 36871	12.0	False	False				False		False		False							ELH23906.1 hypothetical protein A133_02878 [Escherichia coli KTE173]	True	1746
562.22466.con.0041_4|562.22466	COG1069	G	Cluster 3631	12.0	False	False				False	protein:proph:160575 Length: 530 # NCBI annotation: hypothetical protein # Family: family:all:499 # MgeID: mge:2067 # MgeName: prophinder:43829 # Cross-refs: genbank:acc:NP_930947;genbank:gi:37527603;genbank:GeneID:2803752	True		False	{'GO:0005975', 'GO:0016773'}		{'GO:0016773'}	{'GO:0005975'}	{'Reactome: R-HSA-168330', 'Reactome: R-HSA-8856828', 'Reactome: R-DDI-6798695', 'Reactome: R-GGA-983170', 'Reactome: R-MMU-72163', 'Reactome: R-GGA-5689603', 'Reactome: R-XTR-390522', 'MetaCyc: PWY-5818', 'Reactome: R-MMU-4085001', 'MetaCyc: PWY-7693', 'MetaCyc: PWY-6906', 'Reactome: R-RNO-5250924', 'Reactome: R-GGA-3928662', 'Reactome: R-MMU-390522', 'Reactome: R-RNO-5674135', 'Reactome: R-HSA-…	{'IPR018485', 'IPR006003', 'IPR000577', 'IPR018484', 'IPR043129'}	WP_001610769.1 carbohydrate kinase [Escherichia coli]		1747
562.22466.con.0041_5|562.22466	COG2407	G	Cluster 3387	13.0	False	False				False		False		False	{'GO:0016861', 'GO:0005737', 'GO:0005996'}	{'GO:0005737'}	{'GO:0016861'}	{'GO:0005996'}	{'KEGG: 00040', 'KEGG: 00051', 'KEGG: 01100', 'KEGG: 01120'}	{'IPR009015'}	WP_001610770.1 hypothetical protein [Escherichia coli]	True	1748
562.22466.con.0041_6|562.22466	COG0477	G	Cluster 4509	12.0	False	False			{Chlor_Efflux_Pump, emrB, MFS_efflux, TetA, TetH-TetJ, tet_MFS_efflux}	True	protein:plasmid:139466 Length: 419 # NCBI annotation: L-rhamnose-proton symport # Family: family:all:10 # MgeID: mge:902 # MgeName: pMP118 # Cross-refs: genbank:gi:90962721;genbank:GeneID:3978501	True		False	{'GO:0016021', 'GO:0055085', 'GO:0022857'}	{'GO:0016021'}	{'GO:0022857'}	{'GO:0055085'}	{'Reactome: R-RNO-210991', 'Reactome: R-MMU-159418', 'Reactome: R-HSA-8856828', 'Reactome: R-XTR-352230', 'Reactome: R-MMU-5653890', 'Reactome: R-RNO-196757', 'MetaCyc: PWY-6369', 'Reactome: R-HSA-352230', 'Reactome: R-MMU-196819', 'Reactome: R-HSA-442660', 'Reactome: R-HSA-5662702', 'Reactome: R-DME-422356', 'Reactome: R-DME-196836', 'Reactome: R-CEL-428643', 'Reactome: R-HSA-5619070', 'Reactome…	{'IPR005829', 'IPR005828', 'IPR036259', 'IPR020846'}	WP_001610771.1 MFS transporter [Escherichia coli]		1749
562.22466.con.0041_7|562.22466	COG4948	M	Cluster 8686	12.0	False	False				False	protein:plasmid:135009 Length: 369 # NCBI annotation: Mandelate racemase/muconate lactonizing enzyme-like # Family: family:all:139 # MgeID: mge:1094 # MgeName: TM1040 mega plasmid # Cross-refs: genbank:gi:99078371;interpro:IPR013341;interpro:IPR013342;genbank:GeneID:4075569	True		False	{'GO:0009063'}			{'GO:0009063'}	{'MetaCyc: PWY-1501', 'KEGG: 00623', 'MetaCyc: PWY-6948', 'Reactome: R-CEL-70263', 'MetaCyc: PWY-6192', 'Reactome: R-DDI-70171', 'MetaCyc: PWY-7282', 'KEGG: 00051', 'MetaCyc: PWY-8047', 'MetaCyc: PWY-6714', 'MetaCyc: PWY-8152', 'KEGG: 00361', 'MetaCyc: PWY-6886', 'MetaCyc: PWY-7547', 'MetaCyc: PWY-7695', 'MetaCyc: PWY-6107', 'KEGG: 00040', 'MetaCyc: PWY-6142', 'MetaCyc: PWY-5087', 'MetaCyc: PWY-5…	{'IPR029065', 'IPR013342', 'IPR013341', 'IPR018110', 'IPR029017', 'IPR036849'}	WP_001610772.1 mandelate racemase/muconate lactonizing enzyme family protein [Escherichia coli]		1750
562.22466.con.0041_8|562.22466	COG3347	S	Cluster 13868	12.0	False	False				False	protein:plasmid:128261 Length: 268 # NCBI annotation: 3-oxoacyl-[acyl-carrier protein] reductase # Family: family:all:8 # MgeID: mge:856 # MgeName: pNG700 # Cross-refs: genbank:gi:55376607;genbank:GeneID:3127147	True		False	{'GO:0055114'}			{'GO:0055114'}	{'MetaCyc: PWY-6027', 'MetaCyc: PWY-6664', 'MetaCyc: PWY-7862', 'MetaCyc: PWY-3841', 'MetaCyc: PWY-6659', 'MetaCyc: PWY-7693', 'Reactome: R-HSA-77111', 'MetaCyc: PWY-7605', 'Reactome: R-DDI-70171', 'MetaCyc: PWY-6654', 'MetaCyc: PWY-6160', 'MetaCyc: PWY-7341', 'MetaCyc: PWY-5994', 'MetaCyc: PWY-7057', 'MetaCyc: PWY-8035', 'KEGG: 00472', 'Reactome: R-RNO-77305', 'MetaCyc: PWY-8034', 'MetaCyc: PWY-…	{'IPR002347', 'IPR036291'}	WP_001610773.1 SDR family oxidoreductase [Escherichia coli]		1751
562.22466.con.0041_9|562.22466	COG0329	E	Cluster 12276	12.0	False	False				False	protein:plasmid:27278 Length: 299 # NCBI annotation: N-acetylneuraminate lyase # Family: family:all:210 # MgeID: mge:608 # MgeName: pSymB # Cross-refs: genbank:acc:NP_436829;genbank:gi:16264037;genbank:GeneID:1236620	True		False	{'GO:0003824', 'GO:0016829'}		{'GO:0003824', 'GO:0016829'}		{'Reactome: R-DDI-70350', 'MetaCyc: PWY-5301', 'Reactome: R-RNO-71336', 'MetaCyc: PWY-7091', 'Reactome: R-DDI-6798695', 'Reactome: R-HSA-6791055', 'MetaCyc: PWY-7862', 'Reactome: R-BTA-73817', 'MetaCyc: PWY-7161', 'Reactome: R-HSA-73817', 'MetaCyc: PWY-5800', 'Reactome: R-MMU-4085001', 'MetaCyc: PWY-5818', 'MetaCyc: PWY-6906', 'Reactome: R-HSA-77111', 'Reactome: R-DDI-70171', 'Reactome: R-HSA-197…	{'IPR002220', 'IPR013785', 'IPR020625'}	WP_001610774.1 dihydrodipicolinate synthase family protein [Escherichia coli]		1752
562.22471.con.0077_5|562.22471			Cluster 5290	26.0	False	False				False	protein:vir:3631 Length: 111 # NCBI annotation: ORF54 # Family: family:all:3047 # MgeID: mge:74 # MgeName: TP901-1 # Cross-refs: genbank:acc:NP_112717;genbank:gi:13786585;genbank:GeneID:921077	True		False						{'IPR014966'}	WP_023148838.1 MULTISPECIES: FRG domain-containing protein [Enterobacteriaceae]		1758
562.22471.con.0123_2|562.22471			Cluster 9137	22.0	False	False				False		False		False							WP_023148831.1 MULTISPECIES: hypothetical protein [Enterobacteriaceae]	True	1759
562.22471.con.0130_3|562.22471	COG2207	K	Cluster 25373	373.0	False	False			{marA, ramA, robA}	True	protein:plasmid:19670 Length: 138 # NCBI annotation: tetracycline resistance protein D # Family: family:all:40 # MgeID: mge:518 # MgeName: R100 # Cross-refs: genbank:acc:NP_052933;genbank:gi:9507602;genbank:GeneID:1263446	True		False	{'GO:0006355', 'GO:0043565', 'GO:0003700'}		{'GO:0043565', 'GO:0003700'}	{'GO:0006355'}	{'Reactome: R-CEL-3214842', 'MetaCyc: PWY-6027', 'Reactome: R-HSA-156711', 'Reactome: R-HSA-5693565', 'MetaCyc: PWY-7407', 'Reactome: R-MMU-72163', 'Reactome: R-MMU-350054', 'Reactome: R-XTR-174417', 'MetaCyc: PWY-7693', 'Reactome: R-MMU-174417', 'Reactome: R-HSA-1839117', 'Reactome: R-HSA-6785807', 'MetaCyc: PWY-7694', 'MetaCyc: PWY-5994', 'MetaCyc: PWY-2723', 'MetaCyc: PWY-8035', 'Reactome: R-R…	{'IPR009057', 'IPR018062', 'IPR018060'}	WP_000275180.1 MULTISPECIES: helix-turn-helix domain-containing protein [Proteobacteria]		1760
562.22473.con.0023_40|562.22473	COG3347	S	Cluster 14640	1636.0	False	False				False	protein:plasmid:144238 Length: 248 # NCBI annotation: short-chain dehydrogenase/reductase SDR # Family: family:all:8 # MgeID: mge:1969 # MgeName: pSMED01 # Cross-refs: genbank:gi:150375825;interpro:IPR002198;interpro:IPR002347;interpro:IPR002424;interpro:IPR013968;genbank:GeneID:5318782	True	gb|NP_415611.1|antibiotic resistant fabG [Escherichia coli str. K-12 substr. MG1655]	True	{'GO:0016491', 'GO:0055114'}		{'GO:0016491'}	{'GO:0055114'}	{'MetaCyc: PWY-6027', 'MetaCyc: PWY-6664', 'MetaCyc: PWY-7862', 'MetaCyc: PWY-3841', 'MetaCyc: PWY-6659', 'MetaCyc: PWY-7693', 'Reactome: R-HSA-77111', 'MetaCyc: PWY-7605', 'Reactome: R-DDI-70171', 'MetaCyc: PWY-6654', 'MetaCyc: PWY-6160', 'MetaCyc: PWY-7341', 'MetaCyc: PWY-5994', 'MetaCyc: PWY-7057', 'MetaCyc: PWY-8035', 'KEGG: 00472', 'Reactome: R-RNO-77305', 'MetaCyc: PWY-8034', 'MetaCyc: PWY-…	{'IPR002347', 'IPR036291', 'IPR020904'}	ELD56800.1 oxidoreductase with NAD(P)-binding Rossmann-fold [Escherichia coli KTE228]		1761
562.22474.con.0023_1|562.22474			Cluster 28180	251.0	False	False				False	protein:proph:172525 Length: 93 # NCBI annotation: hypothetical protein # Family: family:all:25035 # MgeID: mge:2410 # MgeName: prophinder:43339 # Cross-refs: genbank:acc:NP_309626;genbank:gi:15830853;genbank:GeneID:913293	True		False							WP_000133427.1 MULTISPECIES: hypothetical protein [Enterobacteriaceae]	True	1762
562.22477.con.0006_47|562.22477			Cluster 34658	12.0	False	False				False		False		False						{'IPR009329'}	WP_001683205.1 DUF987 domain-containing protein [Escherichia coli]	True	1763
562.22477.con.0016_132|562.22477			Cluster 1129	190.0	False	False				False	protein:proph:176713 Length: 794 # NCBI annotation: hypothetical protein # Family: family:all:13 # MgeID: mge:2518 # MgeName: prophinder:43590 # Cross-refs: genbank:acc:YP_860050;genbank:gi:117626727;genbank:GeneID:4491964	True		False					{'Reactome: R-MMU-2024096', 'Reactome: R-RNO-5689880', 'Reactome: R-RNO-419037', 'MetaCyc: PWY-7091', 'Reactome: R-DDI-6798695', 'Reactome: R-DME-376176', 'Reactome: R-HSA-186797', 'Reactome: R-HSA-112314', 'Reactome: R-DRE-3000178', 'Reactome: R-HSA-1592389', 'Reactome: R-MMU-72163', 'MetaCyc: PWY-5800', 'Reactome: R-HSA-2022090', 'Reactome: R-MMU-2022090', 'Reactome: R-MMU-419037', 'Reactome: R…	{'IPR013609', 'IPR008969', 'IPR013320'}	WP_021565635.1 phage tail fiber protein [Escherichia coli]		1764
562.22478.con.0010_4|562.22478	COG3064	M	Cluster 4439	2913.0	True	False				False		False		False	{'GO:0016021', 'GO:0019534', 'GO:0043213'}	{'GO:0016021'}	{'GO:0019534'}	{'GO:0043213'}		{'IPR014161'}	WP_000030102.1 cell envelope integrity protein TolA [Shigella dysenteriae]		1765
562.22478.con.0013_160|562.22478			Cluster 4794	19.0	False	False				False		False		False						{'IPR009492', 'IPR032750'}	WP_015056400.1 MULTISPECIES: hypothetical protein [Gammaproteobacteria]	True	1766
562.22479.con.0025_24|562.22479			Cluster 5980	14.0	False	False				False		False		False							CDK88771.1 hypothetical protein [Escherichia coli IS29]	True	1768
562.22479.con.0025_6|562.22479	COG4453	S	Cluster 30083	830.0	False	False				False	protein:plasmid:15831 Length: 95 # NCBI annotation: hypothetical protein # Family: family:all:624 # MgeID: mge:365 # MgeName: pB171 # Cross-refs: genbank:acc:NP_053142;genbank:gi:10955430;genbank:GeneID:1238674	True		False	{'GO:0006355'}			{'GO:0006355'}	{'MetaCyc: PWY-5737', 'KEGG: 00330', 'MetaCyc: PWY-6922', 'MetaCyc: PWY-6853', 'KEGG: 00250', 'KEGG: 01100', 'KEGG: 01110'}	{'IPR010985', 'IPR014795'}	WP_000874911.1 DUF1778 domain-containing protein [Escherichia coli]	True	1767
562.22480.con.0006_144|562.22480			Cluster 7294	14.0	False	False				False		False		False							EFO56830.1 hypothetical protein HMPREF9348_04036 [Escherichia coli MS 145-7]	True	1769
562.22480.con.0007_148|562.22480			Cluster 23542	99.0	False	False				False		False		False							WP_001543429.1 hypothetical protein [Escherichia coli]	True	1770
562.22481.con.0097_3|562.22481			Cluster 38834	7.0	False	False				False		False		False							ETE04230.1 RepA [Escherichia coli LAU-EC8]		1771
562.22482.con.0043_42|562.22482			Cluster 24279	30.0	False	False				False		False		False							WP_001520998.1 hypothetical protein [Escherichia coli]	True	1772
562.22482.con.0148_4|562.22482			Cluster 29945	797.0	False	False				False		False		False							EOU85394.1 hypothetical protein WG5_05401 [Escherichia coli KTE37]	True	1773
562.22484.con.0002_74|562.22484			Cluster 4299	48.0	False	False				False		False		False						{'IPR025686'}	WP_000561375.1 hypothetical protein [Escherichia coli]	True	1774
562.22484.con.0003_196|562.22484	COG1403	V	Cluster 24380	261.0	False	False				False	protein:proph:172529 Length: 146 # NCBI annotation: hypothetical protein # Family: family:all:42 # MgeID: mge:2410 # MgeName: prophinder:43339 # Cross-refs: genbank:acc:NP_309622;genbank:gi:15830849;genbank:GeneID:913298	True		False	{'GO:0004519', 'GO:0003676'}		{'GO:0004519', 'GO:0003676'}		{'MetaCyc: PWY-7250'}	{'IPR003615', 'IPR002711'}	WP_032655283.1 MULTISPECIES: HNH endonuclease [Enterobacteriaceae]		1775
562.22484.con.0003_199|562.22484	COG4695	R	Cluster 6740	265.0	False	False				False	protein:proph:172532 Length: 403 # NCBI annotation: putative head portal protein # Family: family:all:31 # ACLAME annotation(s): phi:0000068 - phage portal protein # MgeID: mge:2410 # MgeName: prophinder:43339 # Cross-refs: genbank:acc:NP_309619;genbank:gi:15830846;genbank:GeneID:913303	True		False						{'IPR006944', 'IPR006427'}	WP_032673048.1 MULTISPECIES: phage portal protein [Enterobacter cloacae complex]		1776
562.22486.con.0003_348|562.22486			Cluster 34299	48.0	False	False				False		False		False							WP_001557863.1 hypothetical protein [Escherichia coli]	True	1777
562.22486.con.0047_2|562.22486			Cluster 31491	12.0	False	False				False		False		False							CDK51194.1 hypothetical protein [Escherichia coli IS5]	True	1778
562.22487.con.0005_200|562.22487			Cluster 30554	354.0	False	False				False	protein:proph:179396 Length: 76 # NCBI annotation: hypothetical protein # Family: family:all:2384 # MgeID: mge:2599 # MgeName: prophinder:42564 # Cross-refs: genbank:acc:NP_752867;genbank:gi:26246827;genbank:GeneID:1038133	True		False						{'IPR021221'}	WP_001579959.1 DUF2724 domain-containing protein [Escherichia coli]	True	1779
562.22488.con.0028_40|562.22488			Cluster 18598	28.0	False	False				False		False		False					{'Reactome: R-SCE-1299503', 'Reactome: R-HSA-1299344', 'Reactome: R-RNO-1299316', 'Reactome: R-MMU-1299503', 'Reactome: R-RNO-1299287', 'Reactome: R-BTA-1299308', 'Reactome: R-HSA-1296052', 'Reactome: R-DME-1299503', 'Reactome: R-HSA-1299287', 'Reactome: R-CEL-1296052', 'Reactome: R-MMU-1299316', 'Reactome: R-DME-1299344', 'Reactome: R-CEL-1299316', 'Reactome: R-SCE-5576886', 'Reactome: R-RNO-557…	{'IPR013099'}	WP_000912556.1 MULTISPECIES: ion transporter [Enterobacteriaceae]		1780
562.22488.con.0032_3|562.22488			Cluster 20116	14.0	False	False				False	protein:plasmid:119736 Length: 78 # NCBI annotation: hypothetical protein # Family: family:all:657 # MgeID: mge:774 # MgeName: pUTI89 # Cross-refs: genbank:gi:91206336;genbank:GeneID:3996458	True		False							EQP82305.1 hypothetical protein G746_04927 [Escherichia coli HVH 84 (4-1021478)]	True	1781
562.22488.con.0056_1|562.22488			Cluster 37224	22.0	False	False				False		False		False							WP_001553840.1 MULTISPECIES: hypothetical protein [Enterobacteriaceae]	True	1782
562.22490.con.0021_53|562.22490			Cluster 24899	11.0	False	False				False	protein:vir:5792 Length: 144 # NCBI annotation: hypothetical protein # Family: family:all:229 # MgeID: mge:122 # MgeName: PY54 # Cross-refs: genbank:acc:NP_892103;genbank:gi:33770566;goa:Q7Y3V7;interpro:IPR005357;uniprot:Q7Y3V7;genbank:GeneID:2637461	True		False						{'IPR031807', 'IPR035069'}	WP_072770518.1 hypothetical protein [Escherichia coli]	True	1783
562.22490.con.0024_11|562.22490			Cluster 12721	4.0	False	False				False		False		False							EOV48562.1 hypothetical protein A1SC_01990 [Escherichia sp. KTE52]	True	1784
562.22490.con.0024_26|562.22490			Cluster 8734	10.0	False	False				False	protein:vir:101370 Length: 494 # NCBI annotation: PacB # Family: family:all:144 # MgeID: mge:1512 # MgeName: P1 # Cross-refs: genbank:acc:YP_006576;genbank:gi:46401730;genbank:GeneID:2777432	True		False							WP_061354298.1 hypothetical protein [Escherichia coli]	True	1785
562.22490.con.0024_30|562.22490			Cluster 28182	14.0	False	False				False		False		False							WP_016262416.1 MULTISPECIES: hypothetical protein [Escherichia]	True	1786
562.22490.con.0024_46|562.22490			Cluster 23850	7.0	False	False				False	protein:proph:170596 Length: 166 # NCBI annotation: hypothetical protein # Family: family:all:67 # MgeID: mge:2355 # MgeName: prophinder:45538 # Cross-refs: genbank:acc:YP_151620;genbank:gi:56414545;genbank:GeneID:3176951	True		False						{'IPR025153'}	OXZ93577.1 hypothetical protein RW80_04526 [Escherichia coli]	True	1787
562.22491.con.0049_9|562.22491			Cluster 28646	108.0	False	False				False		False		False	{'GO:0003676', 'GO:0004518'}		{'GO:0003676', 'GO:0004518'}		{'MetaCyc: PWY-7803', 'Reactome: R-MMU-6783310', 'MetaCyc: PWY-6689', 'Reactome: R-HSA-6784531', 'Reactome: R-HSA-6783310', 'Reactome: R-DRE-6783310'}	{'IPR011856'}	WP_001375319.1 hypothetical protein [Escherichia coli]	True	1788
562.22491.con.0061_3|562.22491	COG4456	S	Cluster 30230	678.0	False	False				False	protein:plasmid:156823 Length: 100 # NCBI annotation: VagC # Family: family:all:603 # MgeID: mge:969 # MgeName: pOU1113 # Cross-refs: genbank:gi:71559017;genbank:GeneID:3523583	True		False	{'GO:0003677'}		{'GO:0003677'}			{'IPR007159', 'IPR037914'}	CAH64825.1 hypothetical protein (plasmid) [uncultured bacterium]	True	1789
562.22493.con.0004_38|562.22493			Cluster 14576	2907.0	True	False				False		False		False					{'Reactome: R-MMU-6798695', 'Reactome: R-SCE-6798695', 'Reactome: R-HSA-9609690', 'Reactome: R-HSA-6798695'}	{'IPR006214'}	EFK18847.1 hypothetical protein HMPREF9530_04608 [Escherichia coli MS 21-1]	True	1790
562.22493.con.0006_182|562.22493	COG1250	I	Cluster 1792	2929.0	True	False				False	protein:plasmid:138886 Length: 714 # NCBI annotation: fatty oxidation complex, alpha subunit # Family: family:all:114 # MgeID: mge:940 # MgeName: megaplasmid # Cross-refs: genbank:gi:56709205;genbank:GeneID:3196739	True		False	{'GO:0016491', 'GO:0008692', 'GO:0055114', 'GO:0070403', 'GO:0004300', 'GO:0051287', 'GO:0006635', 'GO:0016616', 'GO:0003824', 'GO:0006631', 'GO:0003857'}		{'GO:0016491', 'GO:0070403', 'GO:0004300', 'GO:0051287', 'GO:0016616', 'GO:0003824', 'GO:0008692', 'GO:0003857'}	{'GO:0006635', 'GO:0055114', 'GO:0006631'}	{'MetaCyc: PWY-6027', 'MetaCyc: PWY-6664', 'MetaCyc: PWY-7862', 'MetaCyc: PWY-3841', 'MetaCyc: PWY-6659', 'MetaCyc: PWY-7693', 'Reactome: R-HSA-77111', 'MetaCyc: PWY-7605', 'Reactome: R-DDI-70171', 'MetaCyc: PWY-6654', 'MetaCyc: PWY-6160', 'MetaCyc: PWY-7341', 'MetaCyc: PWY-5994', 'MetaCyc: PWY-7057', 'MetaCyc: PWY-8035', 'KEGG: 00472', 'Reactome: R-RNO-77305', 'MetaCyc: PWY-8034', 'MetaCyc: PWY-…	{'IPR006176', 'IPR008927', 'IPR006108', 'IPR006180', 'IPR012802', 'IPR001753', 'IPR036291', 'IPR029045'}	WP_033555891.1 fatty acid oxidation complex subunit alpha FadJ [Escherichia coli]		1791
562.22493.con.0027_19|562.22493			Cluster 32412	48.0	False	False				False		False		False							WP_049290878.1 MULTISPECIES: hypothetical protein [Enterobacteriaceae]	True	1792
562.22493.con.0027_29|562.22493			Cluster 15264	102.0	False	False				False	protein:plasmid:30641 Length: 273 # NCBI annotation: ORF6 # Family: family:all:152 # MgeID: mge:691 # MgeName: pYC # Cross-refs: genbank:acc:NP_053149;genbank:gi:10955840;genbank:GeneID:874859	True		False						{'IPR014158', 'IPR023220'}	WP_000832280.1 MULTISPECIES: type IV secretion system VirB5 protein [Enterobacteriaceae]		1793
562.22494.con.0039_11|562.22494			Cluster 14577	109.0	False	False				False	protein:vir:101348 Length: 320 # NCBI annotation: IsaA # Family: family:all:26445 # MgeID: mge:1512 # MgeName: P1 # Cross-refs: genbank:acc:YP_006486;genbank:gi:46401641;genbank:GeneID:2777410	True		False							WP_023352516.1 hypothetical protein [Escherichia coli]	True	1794
562.22494.con.0045_15|562.22494	COG3550	R	Cluster 5890	13.0	False	False				False	protein:plasmid:126979 Length: 452 # NCBI annotation: HipA domain protein # Family: family:all:15435 # MgeID: mge:1818 # MgeName: pPNAP03 # Cross-refs: genbank:gi:121583226;interpro:IPR012894;genbank:GeneID:4685726	True		False	{'GO:0006355', 'GO:0003700'}		{'GO:0003700'}	{'GO:0006355'}	{'Reactome: R-HSA-8856828', 'MetaCyc: PWY-6027', 'Reactome: R-RNO-5696400', 'Reactome: R-HSA-5368598', 'Reactome: R-HSA-1660514', 'Reactome: R-DME-5610780', 'MetaCyc: PWY-7693', 'Reactome: R-MMU-2468052', 'Reactome: R-DDI-174178', 'MetaCyc: PWY-5994', 'MetaCyc: PWY-8035', 'Reactome: R-XTR-110312', 'Reactome: R-DME-4086400', 'MetaCyc: PWY-7150', 'Reactome: R-DDI-209931', 'MetaCyc: PWY-5437', 'Reac…	{'IPR036390', 'IPR011991', 'IPR001845', 'IPR012893'}	WP_024187835.1 type II toxin-antitoxin system HipA family toxinoxin YjjJ [Escherichia coli]		1795
562.22495.con.0001_76|562.22495			Cluster 5700	14.0	False	False				False		False		False						{'IPR041229'}	WP_097296988.1 hypothetical protein [Escherichia coli]	True	1796
562.22495.con.0018_87|562.22495			Cluster 9688	23.0	False	False				False		False		False						{'IPR021352'}	AWF75647.1 hypothetical protein FOBECEAA_00086 (plasmid) [Escherichia coli]	True	1797
562.22495.con.0056_14|562.22495	COG4220	L	Cluster 21178	395.0	False	False				False	protein:vir:79529 Length: 179 # NCBI annotation: putative small terminase subunit # Family: family:all:1170 # MgeID: mge:1871 # MgeName: cdtI # Cross-refs: genbank:acc:YP_001272514;genbank:gi:148609383;genbank:GeneID:5204365	True		False						{'IPR009901'}	WP_047649230.1 DUF1441 family protein [Escherichia coli]	True	1798
562.22496.con.0004_132|562.22496	COG2271	G	Cluster 5701	21.0	False	False			{tet_MFS_efflux}	True	protein:plasmid:25502 Length: 467 # NCBI annotation: invasion plasmid gene product # Family: family:all:10 # MgeID: mge:605 # MgeName: pCP301 # Cross-refs: genbank:acc:NP_858215;genbank:gi:31983644;genbank:GeneID:1238111	True		False	{'GO:0016021', 'GO:0055085', 'GO:0022857'}	{'GO:0016021'}	{'GO:0022857'}	{'GO:0055085'}	{'Reactome: R-RNO-210991', 'Reactome: R-MMU-159418', 'Reactome: R-HSA-8856828', 'Reactome: R-XTR-352230', 'Reactome: R-MMU-5653890', 'Reactome: R-RNO-196757', 'MetaCyc: PWY-6369', 'Reactome: R-HSA-352230', 'Reactome: R-MMU-196819', 'Reactome: R-HSA-442660', 'Reactome: R-HSA-5662702', 'Reactome: R-DME-422356', 'Reactome: R-DME-196836', 'Reactome: R-CEL-428643', 'Reactome: R-HSA-5619070', 'Reactome…	{'IPR036259', 'IPR000849', 'IPR011701', 'IPR020846'}	WP_032303365.1 MULTISPECIES: MFS transporter [Escherichia]		1799
562.22496.con.0004_133|562.22496	COG3830	E	Cluster 12674	20.0	False	False				False		False		False	{'GO:0004647', 'GO:0006564'}		{'GO:0004647'}	{'GO:0006564'}	{'MetaCyc: PWY-7091', 'Reactome: R-HSA-6796648', 'Reactome: R-BTA-73817', 'Reactome: R-HSA-73817', 'Reactome: R-HSA-5693565', 'MetaCyc: PWY-5269', 'Reactome: R-MMU-4085001', 'MetaCyc: PWY-5818', 'MetaCyc: PWY-6906', 'Reactome: R-HSA-113418', 'MetaCyc: PWY-6160', 'MetaCyc: PWY-6720', 'KEGG: 00740', 'MetaCyc: PWY-6908', 'Reactome: R-DDI-74259', 'Reactome: R-SPO-1483213', 'MetaCyc: PWY-7057', 'MetaC…	{'IPR023214', 'IPR004469', 'IPR036412'}	WP_000152725.1 MULTISPECIES: phosphoserine phosphatase SerB [Escherichia]		1800
562.22496.con.0041_14|562.22496			Cluster 33602	34.0	False	False				False	protein:proph:171959 Length: 82 # NCBI annotation: hypothetical protein # Family: family:all:9887 # MgeID: mge:2393 # MgeName: prophinder:42783 # Cross-refs: genbank:acc:YP_943817;genbank:gi:119946137;genbank:GeneID:4623524	True		False							WP_032303346.1 MULTISPECIES: hypothetical protein [Escherichia]	True	1801
562.22496.con.0051_25|562.22496	COG1794	E	Cluster 13709	2930.0	True	False				False		False		False	{'GO:0047661', 'GO:0016855', 'GO:0006807', 'GO:0036361'}		{'GO:0047661', 'GO:0016855', 'GO:0036361'}	{'GO:0006807'}	{'MetaCyc: PWY-6387', 'KEGG: 00472', 'KEGG: 00250', 'KEGG: 00260', 'KEGG: 00471', 'KEGG: 01100', 'MetaCyc: PWY-6386', 'KEGG: 00270'}	{'IPR015942', 'IPR001920', 'IPR033134', 'IPR004380', 'IPR018187'}	OSK20704.1 putative resistance protein [Escherichia coli M056]		1802
562.22496.con.0089_8|562.22496			Cluster 34484	28.0	False	False				False		False		False							ELF04057.1 hypothetical protein A1WY_00137 [Escherichia coli KTE111]	True	1803
562.22496.con.0165_1|562.22496			Cluster 29383	1878.0	False	False				False	protein:plasmid:19581 Length: 103 # NCBI annotation: conjugal transfer protein TraL # Family: family:all:331 # MgeID: mge:516 # MgeName: F # Cross-refs: genbank:acc:NP_061454;genbank:gi:9507788;genbank:GeneID:1263564	True		False	{'GO:0009297', 'GO:0000746', 'GO:0009279', 'GO:0019867'}	{'GO:0009279', 'GO:0019867'}		{'GO:0009297', 'GO:0000746'}		{'IPR009838', 'IPR016382'}	OSK93962.1 protein TraL, partial [Escherichia coli H386]		1804
562.22498.con.0001_195|562.22498	COG5001	T	Cluster 1326	2927.0	True	False				False	protein:plasmid:26538 Length: 1051 # NCBI annotation: hypothetical protein # Family: family:all:50 # MgeID: mge:607 # MgeName: pSymA # Cross-refs: genbank:acc:NP_436089;genbank:gi:16263296;genbank:GeneID:1235879	True		False					{'MetaCyc: PWY-6545', 'KEGG: 00230', 'KEGG: 00770', 'MetaCyc: PWY-7821', 'KEGG: 00760', 'KEGG: 00500', 'KEGG: 01100', 'KEGG: 00740', 'MetaCyc: PWY-7184', 'MetaCyc: PWY-7206', 'MetaCyc: PWY-7187', 'KEGG: 00240', 'KEGG: 01110'}	{'IPR035919', 'IPR001633', 'IPR033418'}	OAF97746.1 cyclic di-GMP phosphodiesterase YliE [Escherichia coli PCN009]		1805
562.22498.con.0009_54|562.22498	COG3266	S	Cluster 5954	2930.0	True	False				False		False		False	{'GO:0032506', 'GO:0042834', 'GO:0030428'}	{'GO:0030428'}	{'GO:0042834'}	{'GO:0032506'}	{'KEGG: 00511', 'MetaCyc: PWY-7246', 'MetaCyc: PWY-7883', 'MetaCyc: PWY-7647'}	{'IPR032899', 'IPR007730', 'IPR036680'}	WP_000343229.1 cell division protein DamX [Escherichia coli]		1806
562.22498.con.0010_58|562.22498	COG0582	L	Cluster 5553	75.0	False	False				False	protein:proph:170535 Length: 419 # NCBI annotation: integrase # Family: family:all:2 # MgeID: mge:2353 # MgeName: prophinder:45532 # Cross-refs: genbank:acc:YP_153333;genbank:gi:56416258;genbank:GeneID:3177468	True		False	{'GO:0015074', 'GO:0003677', 'GO:0006310'}		{'GO:0003677'}	{'GO:0015074', 'GO:0006310'}	{'MetaCyc: PWY-8179', 'MetaCyc: PWY-8117', 'MetaCyc: PWY-6749', 'Reactome: R-SPO-4615885', 'MetaCyc: PWY-7735', 'MetaCyc: PWY-7127', 'Reactome: R-CEL-4615885', 'Reactome: R-HSA-4615885', 'Reactome: R-DDI-4615885', 'MetaCyc: PWY-6626', 'Reactome: R-MMU-4615885', 'Reactome: R-RNO-4615885', 'MetaCyc: PWY-7419', 'MetaCyc: PWY-7904', 'Reactome: R-SCE-4615885', 'MetaCyc: PWY-6955', 'MetaCyc: PWY-7888',…	{'IPR013762', 'IPR010998', 'IPR002104', 'IPR038488', 'IPR025166', 'IPR011010'}	WP_001311971.1 DUF4102 domain-containing protein [Escherichia coli]	True	1807
562.22498.con.0050_31|562.22498			Cluster 16820	2928.0	True	False				False		False		False						{'IPR021308', 'IPR023373'}	OAF90075.1 putative lipoprotein yjbF, partial [Escherichia coli PCN009]		1808
562.22498.con.0064_24|562.22498	COG2353	S	Cluster 18979	2929.0	True	False				False		False		False						{'IPR007372', 'IPR036761', 'IPR023480'}	KHH41779.1 hypothetical protein PU58_19810, partial [Escherichia coli]	True	1809
562.22501.con.0001_27|562.22501	COG2755	E	Cluster 867	7.0	False	False				False	protein:vir:93686 Length: 300 # NCBI annotation: Bcep22gp66 # Family: family:all:1885 # MgeID: mge:1470 # MgeName: Bcep22 # Cross-refs: genbank:acc:NP_944295;genbank:gi:38640372;genbank:GeneID:2658338	True		False					{'MetaCyc: PWY-6032', 'MetaCyc: PWY-5301', 'MetaCyc: PWY-6314', 'MetaCyc: PWY-7702', 'KEGG: 00590', 'MetaCyc: PWY-8075', 'MetaCyc: PWY-7050', 'MetaCyc: PWY-6027', 'KEGG: 00940', 'MetaCyc: PWY-8084', 'Reactome: R-BTA-6798695', 'MetaCyc: PWY-8036', 'MetaCyc: PWY-7407', 'MetaCyc: PWY-5903', 'Reactome: R-MMU-6811436', 'MetaCyc: PWY-7521', 'MetaCyc: PWY-6948', 'MetaCyc: PWY-5996', 'MetaCyc: PWY-8166',…	{'IPR036514', 'IPR013830'}	WP_001324512.1 SGNH/GDSL hydrolase family protein [Escherichia coli]		1810
562.22501.con.0002_177|562.22501			Cluster 22370	2400.0	False	False				False	protein:plasmid:133628 Length: 160 # NCBI annotation: hypothetical protein # Family: family:all:3082 # MgeID: mge:896 # MgeName: pCAR3 # Cross-refs: genbank:gi:113473819;genbank:GeneID:4241490	True		False	{'GO:0110001', 'GO:0004540'}	{'GO:0110001'}	{'GO:0004540'}			{'IPR021679'}	STG32912.1 toxin of the SohB(PrlF)-YhaV toxin-antitoxin system [Escherichia coli]		1811
562.22501.con.0025_55|562.22501			Cluster 24619	2927.0	True	False				False		False		False					{'Reactome: R-MMU-8963693', 'Reactome: R-DDI-73817', 'KEGG: 00230', 'Reactome: R-HSA-196807', 'MetaCyc: PWY-5', 'KEGG: 00790', 'Reactome: R-HSA-73817', 'Reactome: R-SCE-5358493', 'KEGG: 00540', 'Reactome: R-DME-538864', 'Reactome: R-RNO-70635', 'Reactome: R-CEL-1483191', 'Reactome: R-HSA-379716', 'KEGG: 04714', 'KEGG: 00740', 'Reactome: R-RNO-611105', 'MetaCyc: PWY-6720', 'MetaCyc: PWY-7206', 'Me…	{'IPR014729', 'IPR006015', 'IPR006016'}	WP_054623427.1 universal stress protein UspD [Escherichia coli]		1812
562.22501.con.0050_21|562.22501			Cluster 20975	17.0	False	False				False	protein:proph:179253 Length: 176 # NCBI annotation: putative bacteriophage protein # Family: family:all:1881 # MgeID: mge:2595 # MgeName: prophinder:44805 # Cross-refs: genbank:acc:YP_001175541;genbank:gi:146310467;genbank:GeneID:5111313	True		False							EFJ84663.1 hypothetical protein HMPREF9536_05037 [Escherichia coli MS 84-1]	True	1813
562.22501.con.0108_6|562.22501			Cluster 36524	13.0	False	False				False		False		False							ESC96266.1 hypothetical protein HMPREF1590_03202, partial [Escherichia coli 113302]	True	1814
562.22503.con.0022_1|562.22503			Cluster 24510	33.0	False	False				False		False		False							WP_001050488.1 hypothetical protein [Escherichia coli]	True	1815
562.22503.con.0022_2|562.22503	COG2244	M	Cluster 7546	33.0	False	False				False		False		False	{'GO:0016020'}	{'GO:0016020'}				{'IPR002797'}	WP_000711588.1 polysaccharide biosynthesis protein [Escherichia coli]		1816
562.22503.con.0022_3|562.22503	COG0438	M	Cluster 9973	32.0	False	False				False	protein:plasmid:128263 Length: 381 # NCBI annotation: glycosyl transferase group 1 # Family: family:all:94 # MgeID: mge:856 # MgeName: pNG700 # Cross-refs: genbank:gi:55376758;genbank:GeneID:3127149	True		False	{'GO:0016757'}		{'GO:0016757'}		{'MetaCyc: PWY-7463', 'MetaCyc: PWY-2902', 'MetaCyc: PWY-7145', 'MetaCyc: PWY-5926', 'KEGG: 00540', 'MetaCyc: PWY-5800', 'Reactome: R-HSA-4549380', 'MetaCyc: PWY-7623', 'MetaCyc: PWY-7151', 'MetaCyc: PWY-5875', 'MetaCyc: PWY-6051', 'MetaCyc: PWY-5094', 'Reactome: R-HSA-4551295', 'MetaCyc: PWY-6239', 'MetaCyc: PWY-5379', 'MetaCyc: PWY-2723', 'KEGG: 00524', 'MetaCyc: PWY-7922', 'MetaCyc: PWY-7238',…	{'IPR001296', 'IPR028098'}	WP_001328290.1 glycosyltransferase [Escherichia coli]		1817
562.22503.con.0022_4|562.22503			Cluster 7547	33.0	False	False				False		False		False							WP_001214007.1 oligosaccharide repeat unit polymerase [Escherichia coli]		1818
562.22503.con.0022_5|562.22503	COG0463	M	Cluster 12978	33.0	False	False				False		False		False					{'Reactome: R-CEL-913709', 'MetaCyc: PWY-6664', 'MetaCyc: PWY-5800', 'Reactome: R-MMU-4085001', 'MetaCyc: PWY-5818', 'MetaCyc: PWY-7623', 'MetaCyc: PWY-8113', 'MetaCyc: PWY-6051', 'Reactome: R-MMU-190372', 'MetaCyc: PWY-6720', 'Reactome: R-CEL-964739', 'Reactome: R-DME-2022928', 'MetaCyc: PWY-2021', 'MetaCyc: PWY-6687', 'Reactome: R-HSA-2142850', 'MetaCyc: PWY-7487', 'MetaCyc: PWY-7191', 'KEGG: 0…	{'IPR001173', 'IPR029044'}	WP_001027535.1 glycosyltransferase family 2 protein [Escherichia coli]		1819
562.22503.con.0022_6|562.22503	COG5610	R	Cluster 2924	33.0	False	False				False		False		False					{'MetaCyc: PWY-7091', 'Reactome: R-HSA-6796648', 'Reactome: R-BTA-73817', 'Reactome: R-HSA-73817', 'MetaCyc: PWY-5269', 'Reactome: R-MMU-4085001', 'MetaCyc: PWY-5818', 'MetaCyc: PWY-6906', 'Reactome: R-HSA-113418', 'MetaCyc: PWY-6160', 'MetaCyc: PWY-6720', 'KEGG: 00740', 'MetaCyc: PWY-6908', 'Reactome: R-DDI-74259', 'Reactome: R-SPO-1483213', 'MetaCyc: PWY-7057', 'MetaCyc: PWY-7807', 'Reactome: R…	{'IPR023214'}	WP_001373134.1 hypothetical protein [Escherichia coli]	True	1820
562.22503.con.0022_7|562.22503	COG0463	M	Cluster 12097	33.0	False	False				False		False		False					{'Reactome: R-CEL-913709', 'MetaCyc: PWY-6664', 'MetaCyc: PWY-5800', 'Reactome: R-MMU-4085001', 'MetaCyc: PWY-5818', 'MetaCyc: PWY-7623', 'MetaCyc: PWY-8113', 'MetaCyc: PWY-6051', 'Reactome: R-MMU-190372', 'MetaCyc: PWY-6720', 'Reactome: R-CEL-964739', 'Reactome: R-DME-2022928', 'MetaCyc: PWY-2021', 'MetaCyc: PWY-6687', 'Reactome: R-HSA-2142850', 'MetaCyc: PWY-7487', 'MetaCyc: PWY-7191', 'KEGG: 0…	{'IPR001173', 'IPR029044'}	WP_001183563.1 glycosyltransferase [Escherichia coli]		1821
562.22503.con.0026_9|562.22503			Cluster 25256	15.0	False	False				False	protein:plasmid:24422 Length: 103 # NCBI annotation: hypothetical protein # Family: family:all:22441 # MgeID: mge:588 # MgeName: pHCM2 # Cross-refs: genbank:acc:NP_569570;genbank:gi:18466763;genbank:GeneID:1251485	True		False							WP_023908293.1 MULTISPECIES: hypothetical protein [Enterobacteriaceae]	True	1822
562.22505.con.0003_28|562.22505			Cluster 9389	44.0	False	False				False		False		False	{'GO:0009295'}	{'GO:0009295'}				{'IPR007358'}	WP_001586997.1 hypothetical protein [Escherichia coli]	True	1823
562.22505.con.0003_29|562.22505			Cluster 4661	44.0	False	False				False		False		False							WP_046788432.1 hypothetical protein [Escherichia coli]	True	1824
562.22505.con.0012_148|562.22505	COG1538	M	Cluster 4852	2929.0	True	False			{adeC-adeK-oprM, tolC}	True	protein:plasmid:156064 Length: 513 # NCBI annotation: SilC # Family: family:all:189 # MgeID: mge:807 # MgeName: pLVPK # Cross-refs: genbank:gi:38639717;genbank:GeneID:2657632	True		False	{'GO:0015562', 'GO:0055085', 'GO:0022857', 'GO:0016020'}	{'GO:0016020'}	{'GO:0015562', 'GO:0022857'}	{'GO:0055085'}		{'IPR010131', 'IPR003423'}	WP_096938974.1 efflux transporter outer membrane subunit [Escherichia coli]		1825
562.22507.con.0010_75|562.22507	COG0192	H	Cluster 7869	2931.0	True	False				False	protein:plasmid:29624 Length: 406 # NCBI annotation: probable S-adenosylmethionine synthetase # Family: family:all:2067 # MgeID: mge:661 # MgeName: pSLA2-L # Cross-refs: genbank:acc:NP_851473;genbank:gi:30795023;genbank:GeneID:4267838	True		False	{'GO:0004478', 'GO:0005524', 'GO:0006556'}		{'GO:0004478', 'GO:0005524'}	{'GO:0006556'}	{'MetaCyc: PWY-8119', 'Reactome: R-MMU-1614635', 'Reactome: R-DME-1614635', 'Reactome: R-RNO-156581', 'Reactome: R-HSA-2408508', 'KEGG: 00270', 'Reactome: R-HSA-156581', 'Reactome: R-RNO-2408508', 'Reactome: R-SPO-1614635', 'Reactome: R-DME-2408508', 'MetaCyc: PWY-6151', 'Reactome: R-DDI-1614635', 'Reactome: R-SPO-2408508', 'Reactome: R-SPO-156581', 'Reactome: R-MMU-2408508', 'MetaCyc: PWY-5041',…	{'IPR022631', 'IPR022630', 'IPR022629', 'IPR002133', 'IPR022636', 'IPR022628'}	WP_001062128.1 MULTISPECIES: S-adenosylmethionine synthase [Proteobacteria]		1826
562.22507.con.0021_52|562.22507	COG0507	L	Cluster 61	2105.0	False	False				False	protein:plasmid:119783 Length: 1756 # NCBI annotation: DNA helicase I # Family: family:all:28 # MgeID: mge:774 # MgeName: pUTI89 # Cross-refs: genbank:gi:91206383;genbank:GeneID:3996505	True		False	{'GO:0005524', 'GO:0003678', 'GO:0000746', 'GO:0016818', 'GO:0003677'}		{'GO:0005524', 'GO:0016818', 'GO:0003677', 'GO:0003678'}	{'GO:0000746'}	{'Reactome: R-HSA-8856828', 'Reactome: R-DME-2179392', 'MetaCyc: PWY-6027', 'Reactome: R-GGA-68689', 'Reactome: R-RNO-5696400', 'Reactome: R-BTA-73817', 'Reactome: R-MMU-381042', 'Reactome: R-GGA-2871796', 'Reactome: R-HSA-5693565', 'Reactome: R-DME-5610780', 'Reactome: R-DDI-5358565', 'Reactome: R-HSA-9684325', 'MetaCyc: PWY-3841', 'Reactome: R-HSA-1660514', 'MetaCyc: PWY-6659', 'Reactome: R-HSA…	{'IPR014125', 'IPR008875', 'IPR009767', 'IPR040668', 'IPR014129', 'IPR027417', 'IPR014059', 'IPR014862', 'IPR040987'}	ELC41953.1 protein traX [Escherichia coli KTE21]		1827
562.22507.con.0076_6|562.22507	COG1112	L	Cluster 368	23.0	False	False				False	protein:plasmid:131021 Length: 1176 # NCBI annotation: hypothetical protein # Family: family:all:994 # MgeID: mge:1815 # MgeName: pDVUL01 # Cross-refs: genbank:gi:120586879;genbank:GeneID:4661955	True		False	{'GO:0003824'}		{'GO:0003824'}		{'Reactome: R-HSA-8856828', 'Reactome: R-DME-2179392', 'MetaCyc: PWY-6027', 'Reactome: R-GGA-68689', 'Reactome: R-RNO-5696400', 'Reactome: R-BTA-73817', 'Reactome: R-MMU-381042', 'Reactome: R-GGA-2871796', 'Reactome: R-HSA-5693565', 'Reactome: R-DME-5610780', 'Reactome: R-HSA-9684325', 'Reactome: R-DDI-5358565', 'MetaCyc: PWY-3841', 'Reactome: R-HSA-1660514', 'MetaCyc: PWY-6659', 'Reactome: R-HSA…	{'IPR041679', 'IPR025202', 'IPR027417', 'IPR001736'}	SCA72778.1 superfamily I DNA helicase [Escherichia coli]		1828
562.22507.con.0078_10|562.22507			Cluster 15415	23.0	False	False				False	protein:plasmid:117072 Length: 470 # NCBI annotation: hypothetical protein # Family: family:all:650 # MgeID: mge:1906 # MgeName: pRSPA02 # Cross-refs: genbank:gi:146280026;genbank:GeneID:5086199	True		False	{'GO:0004803', 'GO:0006313', 'GO:0003677'}		{'GO:0004803', 'GO:0003677'}	{'GO:0006313'}	{'Reactome: R-SCE-6791226', 'Reactome: R-GGA-6804115', 'Reactome: R-MMU-6804115', 'Reactome: R-SPO-429947', 'Reactome: R-HSA-5693616', 'MetaCyc: PWY-7961', 'Reactome: R-DME-110312', 'Reactome: R-MMU-69183', 'MetaCyc: PWY-7968', 'Reactome: R-HSA-3108214', 'Reactome: R-MMU-5656121', 'Reactome: R-SPO-674695', 'Reactome: R-MMU-69473', 'Reactome: R-RNO-5696400', 'Reactome: R-DME-203927', 'Reactome: R-…	{'IPR002559', 'IPR014737', 'IPR012337', 'IPR014736', 'IPR003201'}	WP_001522330.1 MULTISPECIES: IS4 family transposase [Enterobacteriaceae]		1832
562.22507.con.0078_2|562.22507			Cluster 33424	22.0	False	False				False	protein:plasmid:121565 Length: 120 # NCBI annotation: hypothetical protein # Family: family:all:14418 # MgeID: mge:819 # MgeName: pO113 # Cross-refs: genbank:gi:73853223;genbank:GeneID:3654592	True		False							WP_001522318.1 hypothetical protein [Escherichia coli]	True	1829
562.22507.con.0078_3|562.22507			Cluster 33604	26.0	False	False				False		False		False							WP_001522320.1 MULTISPECIES: hypothetical protein [Enterobacteriaceae]	True	1830
562.22507.con.0078_9|562.22507			Cluster 23001	22.0	False	False				False		False		False						{'IPR006713', 'IPR037028', 'IPR008966', 'IPR021020'}	WP_046072888.1 afimbrial adhesin [Escherichia coli]		1831
562.22508.con.0067_4|562.22508	COG0613	S	Cluster 1027	60.0	False	False				False	protein:plasmid:15825 Length: 873 # NCBI annotation: hypothetical protein # Family: family:all:3598 # MgeID: mge:365 # MgeName: pB171 # Cross-refs: genbank:acc:NP_053136;genbank:gi:10955424;genbank:GeneID:1238668	True		False	{'GO:0003824'}		{'GO:0003824'}		{'Reactome: R-HSA-8856828', 'Reactome: R-DME-2179392', 'MetaCyc: PWY-6027', 'Reactome: R-GGA-68689', 'Reactome: R-RNO-5696400', 'Reactome: R-BTA-73817', 'Reactome: R-MMU-381042', 'Reactome: R-GGA-2871796', 'Reactome: R-HSA-5693565', 'Reactome: R-DME-5610780', 'Reactome: R-DDI-5358565', 'Reactome: R-HSA-9684325', 'MetaCyc: PWY-3841', 'Reactome: R-HSA-1660514', 'MetaCyc: PWY-6659', 'Reactome: R-HSA…	{'IPR027417', 'IPR016195'}	WP_016238490.1 hypothetical protein [Escherichia coli]	True	1833
562.22508.con.0067_8|562.22508			Cluster 21381	81.0	False	False				False	protein:plasmid:15830 Length: 176 # NCBI annotation: hypothetical protein # Family: family:all:595 # MgeID: mge:365 # MgeName: pB171 # Cross-refs: genbank:acc:NP_053141;genbank:gi:10955429;genbank:GeneID:1238673	True		False	{'GO:0008080'}		{'GO:0008080'}		{'MetaCyc: PWY-6027', 'Reactome: R-HSA-5693565', 'MetaCyc: PWY-7407', 'Reactome: R-MMU-350054', 'MetaCyc: PWY-7693', 'Reactome: R-HSA-177135', 'Reactome: R-RNO-5693607', 'Reactome: R-BTA-351200', 'MetaCyc: PWY-7694', 'MetaCyc: PWY-5994', 'Reactome: R-RNO-177128', 'Reactome: R-MMU-5693568', 'MetaCyc: PWY-8035', 'Reactome: R-SPO-351200', 'MetaCyc: PWY-6157', 'MetaCyc: PWY-7448', 'Reactome: R-MMU-56…	{'IPR016181', 'IPR000182'}	WP_000348884.1 GNAT family N-acetyltransferase [Escherichia coli]		1834
562.22508.con.0068_11|562.22508			Cluster 13037	51.0	False	False				False		False		False							WP_001586225.1 MULTISPECIES: hypothetical protein [Enterobacteriaceae]	True	1836
562.22508.con.0068_12|562.22508	COG1106	S	Cluster 3820	51.0	False	False			{macB}	True	protein:plasmid:24705 Length: 518 # NCBI annotation: hypothetical protein # Family: family:all:4692 # MgeID: mge:595 # MgeName: R64 # Cross-refs: genbank:acc:NP_863390;genbank:gi:32470166;genbank:GeneID:1446647	True		False	{'GO:0005524', 'GO:0016887'}		{'GO:0005524', 'GO:0016887'}		{'Reactome: R-HSA-8856828', 'Reactome: R-DME-2179392', 'MetaCyc: PWY-6027', 'Reactome: R-GGA-68689', 'Reactome: R-RNO-5696400', 'Reactome: R-BTA-73817', 'Reactome: R-MMU-381042', 'Reactome: R-GGA-2871796', 'Reactome: R-HSA-5693565', 'Reactome: R-DME-5610780', 'Reactome: R-DDI-5358565', 'Reactome: R-HSA-9684325', 'MetaCyc: PWY-3841', 'Reactome: R-HSA-1660514', 'MetaCyc: PWY-6659', 'Reactome: R-HSA…	{'IPR003593', 'IPR027417', 'IPR003959', 'IPR038729'}	WP_001586226.1 MULTISPECIES: ABC transporter ATP-binding protein [Enterobacteriaceae]		1837
562.22508.con.0068_9|562.22508			Cluster 11717	275.0	False	False				False		False		False							WP_000991831.1 MULTISPECIES: hypothetical protein [Enterobacteriaceae]	True	1835
562.22509.con.0009_113|562.22509	COG1279	R	Cluster 17481	2931.0	True	False				False	protein:plasmid:122653 Length: 208 # NCBI annotation: Lysine exporter protein (LYSE/YGGA) # Family: family:all:526 # MgeID: mge:1842 # MgeName: pRSPH01 # Cross-refs: genbank:gi:126464904;interpro:IPR001123;genbank:GeneID:4895048	True		False	{'GO:0015181', 'GO:0016020', 'GO:0015809', 'GO:0016021', 'GO:0006865'}	{'GO:0016021', 'GO:0016020'}	{'GO:0015181'}	{'GO:0006865', 'GO:0015809'}		{'IPR004777', 'IPR023445', 'IPR001123'}	WP_000493343.1 arginine exporter ArgO [Escherichia coli]		1838
562.22510.con.0015_24|562.22510	COG5301	S	Cluster 873	449.0	False	False				False	protein:vir:5708 Length: 913 # NCBI annotation: gpH # Family: family:all:13 # MgeID: mge:120 # MgeName: L-413C # Cross-refs: genbank:acc:NP_839867;genbank:gi:30065722;genbank:GeneID:1260616	True		False						{'IPR005068', 'IPR022225'}	WP_001540327.1 phage tail fiber protein [Escherichia coli]		1839
562.22511.con.0008_33|562.22511			Cluster 11555	598.0	False	False				False		False		False						{'IPR031026'}	ERB24843.1 lipopolysaccharide core biosynthesis protein [Escherichia coli UMEA 3271-1]		1840
562.22511.con.0048_7|562.22511	COG2831	U	Cluster 8227	49.0	False	False				False	protein:proph:160553 Length: 554 # NCBI annotation: hypothetical protein # Family: family:all:2324 # MgeID: mge:2067 # MgeName: prophinder:43829 # Cross-refs: genbank:acc:NP_930926;genbank:gi:37527582;genbank:GeneID:2803730	True		False					{'Reactome: R-HSA-1268020', 'Reactome: R-HSA-8949613'}	{'IPR035251', 'IPR010069', 'IPR034746', 'IPR013686'}	EDU34238.1 potra domain, shlb-type family [Escherichia coli O157:H7 str. EC4196]		1841
562.22512.con.0013_57|562.22512	COG0149	G	Cluster 15061	2928.0	True	False				False	protein:plasmid:23153 Length: 250 # NCBI annotation: hypothetical protein # Family: family:all:5659 # MgeID: mge:573 # MgeName: pRi1724 # Cross-refs: genbank:acc:NP_066667;genbank:gi:10954732;genbank:GeneID:874788	True		False	{'GO:0003824', 'GO:0004807', 'GO:0006096'}		{'GO:0003824', 'GO:0004807'}	{'GO:0006096'}	{'Reactome: R-DDI-70350', 'MetaCyc: PWY-5301', 'Reactome: R-RNO-71336', 'MetaCyc: PWY-7091', 'Reactome: R-DDI-6798695', 'Reactome: R-HSA-6791055', 'MetaCyc: PWY-7862', 'Reactome: R-BTA-73817', 'MetaCyc: PWY-7161', 'Reactome: R-HSA-73817', 'MetaCyc: PWY-5800', 'Reactome: R-MMU-4085001', 'MetaCyc: PWY-5818', 'MetaCyc: PWY-6906', 'Reactome: R-HSA-77111', 'Reactome: R-DDI-70171', 'Reactome: R-HSA-197…	{'IPR022896', 'IPR000652', 'IPR035990', 'IPR020861', 'IPR013785'}	WP_001540342.1 triose-phosphate isomerase [Escherichia coli]		1842
562.22514.con.0024_55|562.22514	COG3500	R	Cluster 9630	403.0	False	False				False	protein:proph:165695 Length: 373 # NCBI annotation: late control D family protein # Family: family:all:108 # MgeID: mge:2217 # MgeName: prophinder:46916 # Cross-refs: genbank:acc:YP_001478276;interpro:IPR010277;genbank:gi:157370287;genbank:GeneID:5607166	True		False							WP_001531766.1 hypothetical protein [Escherichia coli]	True	1843
562.22518.con.0063_3|562.22518	COG5301	S	Cluster 2624	60.0	False	False				False	protein:proph:181045 Length: 661 # NCBI annotation: putative phage protein gpH # Family: family:all:13 # MgeID: mge:2644 # MgeName: prophinder:43016 # Cross-refs: genbank:acc:YP_539940;genbank:gi:91209954;genbank:GeneID:3993002	True		False						{'IPR005068', 'IPR022225'}	WP_032199656.1 phage tail protein [Escherichia coli]		1844
562.22520.con.0004_55|562.22520	COG4653	R	Cluster 7635	93.0	False	False				False	protein:proph:177449 Length: 385 # NCBI annotation: putative capsid protein of prophage CP-933C # Family: family:all:21 # MgeID: mge:2538 # MgeName: prophinder:42680 # Cross-refs: genbank:acc:NP_287332;genbank:gi:15801315;genbank:GeneID:959604	True		False						{'IPR024455'}	WP_023143988.1 phage major capsid protein [Escherichia coli]		1845
562.22520.con.0017_80|562.22520	COG2956	G	Cluster 7591	2928.0	True	False				False		False		False	{'GO:0005515', 'GO:0008653'}		{'GO:0005515'}	{'GO:0008653'}	{'Reactome: R-HSA-8856828', 'MetaCyc: PWY-5301', 'Reactome: R-BTA-69017', 'Reactome: R-RNO-5689880', 'Reactome: R-HSA-6796648', 'Reactome: R-DDI-6798695', 'Reactome: R-HSA-418594', 'Reactome: R-MMU-8876198', 'Reactome: R-HSA-3108214', 'MetaCyc: PWY-7161', 'Reactome: R-HSA-5693565', 'Reactome: R-DDI-5358565', 'Reactome: R-MMU-72163', 'Reactome: R-HSA-975957', 'MetaCyc: PWY-5800', 'Reactome: R-RNO-…	{'IPR030865', 'IPR011990', 'IPR019734', 'IPR013026', 'IPR041166'}	WP_023143871.1 lipopolysaccharide assembly protein LapB [Escherichia coli]		1846
562.22520.con.0081_4|562.22520			Cluster 20483	55.0	False	False				False	protein:plasmid:156033 Length: 186 # NCBI annotation: hypothetical protein # Family: family:all:173 # MgeID: mge:807 # MgeName: pLVPK # Cross-refs: genbank:gi:38639593;genbank:GeneID:2657601	True		False	{'GO:0003677'}		{'GO:0003677'}		{'Reactome: R-CEL-3214842', 'MetaCyc: PWY-6027', 'Reactome: R-HSA-156711', 'Reactome: R-HSA-5693565', 'MetaCyc: PWY-7407', 'Reactome: R-MMU-72163', 'Reactome: R-MMU-350054', 'Reactome: R-XTR-174417', 'MetaCyc: PWY-7693', 'Reactome: R-MMU-174417', 'Reactome: R-HSA-1839117', 'Reactome: R-HSA-6785807', 'MetaCyc: PWY-7694', 'MetaCyc: PWY-5994', 'MetaCyc: PWY-2723', 'MetaCyc: PWY-8035', 'Reactome: R-R…	{'IPR036271', 'IPR001647', 'IPR009057'}	EDX27929.1 transcriptional regulator, TetR family [Escherichia coli B171]		1847
562.22520.con.0091_3|562.22520			Cluster 34668	60.0	False	False				False		False		False							WP_001251694.1 MULTISPECIES: hypothetical protein [Gammaproteobacteria]	True	1848
562.22520.con.0091_4|562.22520			Cluster 35802	59.0	False	False				False		False		False							WP_000131876.1 MULTISPECIES: hypothetical protein [Proteobacteria]	True	1849
562.22520.con.0181_2|562.22520	COG0262	H	Cluster 22090	42.0	False	True	dfrA8	3002863.0		False	protein:plasmid:148585 Length: 191 # NCBI annotation: dihydrofolate reductase # Family: family:all:471 # MgeID: mge:1975 # MgeName: pYR1 # Cross-refs: genbank:gi:134044506;genbank:GeneID:4927165	True	gb|AHV80711.1|dfrA8 [Salmonella enterica subsp. enterica serovar Typhimurium]	True	{'GO:0055114', 'GO:0046654', 'GO:0006545', 'GO:0050661', 'GO:0004146'}		{'GO:0004146', 'GO:0050661'}	{'GO:0006545', 'GO:0046654', 'GO:0055114'}	{'MetaCyc: PWY-7210', 'Reactome: R-RNO-196757', 'KEGG: 00790', 'MetaCyc: PWY-3841', 'Reactome: R-HSA-69205', 'Reactome: R-HSA-196757', 'MetaCyc: PWY-7187', 'KEGG: 00240', 'MetaCyc: PWY-7198', 'Reactome: R-SPO-196757', 'KEGG: 00740', 'MetaCyc: PWY-7184', 'Reactome: R-MMU-196757', 'Reactome: R-DME-196757', 'Reactome: R-CEL-196757', 'KEGG: 00670', 'KEGG: 01100', 'MetaCyc: PWY-6167', 'MetaCyc: PWY-53…	{'IPR024072', 'IPR001796', 'IPR012259', 'IPR017925'}	WP_000571065.1 MULTISPECIES: trimethoprim-resistant dihydrofolate reductase DfrA8 [Gammaproteobacteria]		1850
562.22521.con.0015_16|562.22521			Cluster 14916	6.0	False	False				False	protein:plasmid:24239 Length: 259 # NCBI annotation: hypothetical protein # Family: family:all:5624 # MgeID: mge:587 # MgeName: pHCM1 # Cross-refs: genbank:acc:NP_569392;genbank:gi:18466584;genbank:GeneID:1251358	True		False					{'Reactome: R-HSA-1483166', 'MetaCyc: PWY-7039', 'Reactome: R-DDI-6798695', 'MetaCyc: PWY-6385', 'KEGG: 00565', 'Reactome: R-BTA-1483166', 'Reactome: R-MMU-2029485', 'MetaCyc: PWY-7404', 'MetaCyc: PWY-6350', 'MetaCyc: PWY-6689', 'MetaCyc: PWY-7366', 'MetaCyc: PWY-5269', 'MetaCyc: PWY-3561', 'MetaCyc: PWY-7119', 'MetaCyc: PWY-7981', 'Reactome: R-HSA-2029485', 'Reactome: R-HSA-6798695', 'MetaCyc: P…	{'IPR025202'}	WP_000250919.1 MULTISPECIES: hypothetical protein [Enterobacteriaceae]	True	1852
562.22521.con.0015_24|562.22521			Cluster 25135	5.0	False	False				False	protein:plasmid:24245 Length: 141 # NCBI annotation: hypothetical protein # Family: family:all:4635 # MgeID: mge:587 # MgeName: pHCM1 # Cross-refs: genbank:acc:NP_569399;genbank:gi:18466591;genbank:GeneID:1251353	True		False							WP_001447552.1 MULTISPECIES: hypothetical protein [Enterobacteriaceae]	True	1853
562.22521.con.0015_25|562.22521			Cluster 26740	5.0	False	False				False	protein:plasmid:24244 Length: 128 # NCBI annotation: hypothetical protein # Family: family:all:6269 # MgeID: mge:587 # MgeName: pHCM1 # Cross-refs: genbank:acc:NP_569398;genbank:gi:18466590;genbank:GeneID:1251355	True		False							WP_000537778.1 MULTISPECIES: hypothetical protein [Enterobacteriaceae]	True	1854
562.22521.con.0015_27|562.22521			Cluster 470	6.0	False	False				False	protein:plasmid:24243 Length: 1111 # NCBI annotation: hypothetical protein # Family: family:all:2008 # MgeID: mge:587 # MgeName: pHCM1 # Cross-refs: genbank:acc:NP_569397;genbank:gi:18466589;genbank:GeneID:1251354	True		False							WP_113977257.1 hypothetical protein [Escherichia coli]	True	1855
562.22521.con.0015_28|562.22521			Cluster 28066	6.0	False	False				False	protein:plasmid:24603 Length: 117 # NCBI annotation: hypothetical protein # Family: family:all:6260 # MgeID: mge:593 # MgeName: R27 # Cross-refs: genbank:acc:NP_058352;genbank:gi:10957328;genbank:GeneID:875167	True		False							WP_000694887.1 MULTISPECIES: hypothetical protein [Enterobacteriaceae]	True	1856
562.22521.con.0015_59|562.22521			Cluster 31327	8.0	False	False				False	protein:plasmid:24320 Length: 93 # NCBI annotation: hypothetical protein # Family: family:all:6272 # MgeID: mge:587 # MgeName: pHCM1 # Cross-refs: genbank:acc:NP_569468;genbank:gi:18466660;genbank:GeneID:1251224	True		False							WP_000798703.1 MULTISPECIES: hypothetical protein [Enterobacteriaceae]	True	1857
562.22521.con.0015_5|562.22521			Cluster 31816	6.0	False	False				False	protein:plasmid:24626 Length: 90 # NCBI annotation: hypothetical protein # Family: family:all:9877 # MgeID: mge:593 # MgeName: R27 # Cross-refs: genbank:acc:NP_058375;genbank:gi:10957351;genbank:GeneID:875124	True		False							WP_001082183.1 MULTISPECIES: hypothetical protein [Enterobacteriaceae]	True	1851
562.22521.con.0015_60|562.22521			Cluster 7179	8.0	False	False				False	protein:plasmid:24321 Length: 401 # NCBI annotation: putative DNA-binding protein # Family: family:all:608 # MgeID: mge:587 # MgeName: pHCM1 # Cross-refs: genbank:acc:NP_569469;genbank:gi:18466661;genbank:GeneID:1251225	True		False							WP_000108723.1 MULTISPECIES: DNA-binding protein [Enterobacteriaceae]		1858
562.22521.con.0023_33|562.22521			Cluster 17930	65.0	False	False				False		False		False					{'Reactome: R-SPO-3108214', 'Reactome: R-SPO-5221030', 'Reactome: R-HSA-9609690', 'Reactome: R-HSA-110329', 'Reactome: R-RNO-110329', 'Reactome: R-HSA-3108214', 'Reactome: R-MMU-110357', 'Reactome: R-HSA-110328', 'MetaCyc: PWY-3961', 'MetaCyc: PWY-2381', 'MetaCyc: PWY-7826', 'Reactome: R-HSA-5221030', 'MetaCyc: PWY-8037', 'Reactome: R-SPO-110329', 'Reactome: R-SCE-110329', 'MetaCyc: PWY-5381', 'R…	{'IPR036895'}	WP_001586621.1 hypothetical protein [Escherichia coli]	True	1859
562.22521.con.0046_3|562.22521			Cluster 25819	7.0	False	False				False	protein:plasmid:24225 Length: 139 # NCBI annotation: hypothetical protein # Family: family:all:3713 # MgeID: mge:587 # MgeName: pHCM1 # Cross-refs: genbank:acc:NP_569377;genbank:gi:18466569;genbank:GeneID:1251373	True		False							WP_001178596.1 MULTISPECIES: hypothetical protein [Enterobacteriaceae]	True	1860
562.22521.con.0046_5|562.22521			Cluster 30696	11.0	False	False				False		False		False							WP_000583905.1 MULTISPECIES: hypothetical protein [Enterobacteriaceae]	True	1861
562.22521.con.0072_2|562.22521	COG5527	L	Cluster 14381	703.0	False	False				False	protein:plasmid:24198 Length: 251 # NCBI annotation: putative replication initiation protein # Family: family:all:46 # MgeID: mge:587 # MgeName: pHCM1 # Cross-refs: genbank:acc:NP_569349;genbank:gi:18466541;genbank:GeneID:1251201	True		False	{'GO:0006270', 'GO:0003887'}		{'GO:0003887'}	{'GO:0006270'}	{'Reactome: R-HSA-8856828', 'MetaCyc: PWY-6027', 'Reactome: R-CEL-3214842', 'Reactome: R-RNO-5696400', 'Reactome: R-HSA-5368598', 'Reactome: R-HSA-1660514', 'Reactome: R-HSA-5693565', 'Reactome: R-DME-5610780', 'MetaCyc: PWY-7693', 'Reactome: R-MMU-2468052', 'Reactome: R-DDI-174178', 'MetaCyc: PWY-6720', 'MetaCyc: PWY-5994', 'MetaCyc: PWY-2723', 'MetaCyc: PWY-8035', 'Reactome: R-XTR-110312', 'Rea…	{'IPR036390', 'IPR036388', 'IPR000525'}	WP_024127734.1 replication initiation protein RepE [Escherichia coli]		1862
562.22522.con.0003_166|562.22522	COG1133	I	Cluster 2533	2931.0	True	False				False	protein:plasmid:28114 Length: 420 # NCBI annotation: putative transport protein, essential for bacteroid development protein # Family: family:all:3086 # MgeID: mge:608 # MgeName: pSymB # Cross-refs: genbank:acc:NP_437665;genbank:gi:16264873;genbank:GeneID:1237456	True		False	{'GO:0016021', 'GO:0015833', 'GO:1904680'}	{'GO:0016021'}	{'GO:1904680'}	{'GO:0015833'}		{'IPR011673', 'IPR009248'}	STL41159.1 putative lipoprotein [Escherichia coli]		1863
562.22522.con.0007_23|562.22522	COG0616	OU	Cluster 5830	401.0	False	False				False	protein:proph:163871 Length: 436 # NCBI annotation: S49 family peptidase # Family: family:all:223 # MgeID: mge:2158 # MgeName: prophinder:44205 # Cross-refs: genbank:acc:YP_001463293;genbank:gi:157157447;genbank:GeneID:5587059	True		False	{'GO:0006508', 'GO:0008233'}		{'GO:0008233'}	{'GO:0006508'}	{'Reactome: R-HSA-70895', 'MetaCyc: PWY-6027', 'MetaCyc: PWY-5789', 'MetaCyc: PWY-7407', 'MetaCyc: PWY-7693', 'Reactome: R-SSC-71032', 'MetaCyc: PWY-7694', 'MetaCyc: PWY-5994', 'MetaCyc: PWY-8035', 'Reactome: R-RNO-77305', 'MetaCyc: PWY-7448', 'MetaCyc: PWY-5744', 'MetaCyc: PWY-7670', 'MetaCyc: PWY-5437', 'MetaCyc: PWY-7007', 'Reactome: R-DDI-70895', 'Reactome: R-HSA-1482798', 'MetaCyc: PWY-6583'…	{'IPR029045', 'IPR002142', 'IPR033855'}	WP_001145891.1 S49 family peptidase [Escherichia coli]		1864
562.22522.con.0007_26|562.22522	COG5525	R	Cluster 2534	394.0	False	False				False	protein:proph:163893 Length: 654 # NCBI annotation: phage terminase large subunit (GpA) # Family: family:all:140 # MgeID: mge:2158 # MgeName: prophinder:44205 # Cross-refs: genbank:acc:YP_001463296;genbank:gi:157155074;genbank:GeneID:5589405	True		False	{'GO:0005524', 'GO:0004519', 'GO:0016887'}		{'GO:0005524', 'GO:0004519', 'GO:0016887'}		{'MetaCyc: PWY-7250'}	{'IPR008866'}	SQN44876.1 phage terminase large subunit (GpA) [Escherichia coli]		1865
562.22522.con.0007_32|562.22522			Cluster 31168	395.0	False	False				False		False		False						{'IPR008473'}	WP_039264477.1 phage holin family protein [Escherichia coli]		1866
562.22522.con.0007_46|562.22522			Cluster 14579	396.0	False	False				False	protein:proph:163867 Length: 264 # NCBI annotation: hypothetical protein # Family: family:all:12 # ACLAME annotation(s): phi:0000048 - negative transcriptional regulation of phage gene expression # MgeID: mge:2158 # MgeName: prophinder:44205 # Cross-refs: genbank:acc:YP_001463310;genbank:gi:157156085;genbank:GeneID:5586270	True		False						{'IPR018873'}	WP_039264483.1 ORF6N domain-containing protein [Escherichia coli]		1867
562.22522.con.0007_59|562.22522			Cluster 1663	397.0	False	False				False	protein:proph:163891 Length: 688 # NCBI annotation: hypothetical protein # Family: family:all:184 # MgeID: mge:2158 # MgeName: prophinder:44205 # Cross-refs: genbank:acc:YP_001463319;genbank:gi:157158297;genbank:GeneID:5589277	True		False							WP_028985345.1 hypothetical protein [Escherichia coli]	True	1868
562.22524.con.0004_86|562.22524	COG1116	P	Cluster 7871	2928.0	True	False				False	protein:plasmid:134701 Length: 384 # NCBI annotation: Alkanesulfonate monooxygenase # Family: family:all:137 # MgeID: mge:1094 # MgeName: TM1040 mega plasmid # Cross-refs: genbank:gi:99078338;interpro:IPR011251;genbank:GeneID:4075261	True		False	{'GO:0008726', 'GO:0016705', 'GO:0055114'}		{'GO:0008726', 'GO:0016705'}	{'GO:0055114'}	{'MetaCyc: PWY-6032', 'MetaCyc: PWY-5955', 'Reactome: R-HSA-1222541', 'MetaCyc: PWY-7784', 'MetaCyc: PWY-6200', 'MetaCyc: PWY-1121', 'MetaCyc: PWY-7065', 'MetaCyc: PWY-7490', 'MetaCyc: PWY-7926', 'KEGG: 00524', 'MetaCyc: PWY-7325', 'MetaCyc: PWY-7035', 'MetaCyc: PWY-6047', 'MetaCyc: PWY-7826', 'MetaCyc: PWY-699', 'MetaCyc: PWY-7019', 'MetaCyc: PWY-7687', 'MetaCyc: PWY-5168', 'MetaCyc: PWY-7561', …	{'IPR036661', 'IPR019911', 'IPR011251'}	WP_021523908.1 alkanesulfonate monooxygenase, FMNH(2)-dependent [Escherichia coli]		1869
562.22524.con.0019_27|562.22524	COG0161	E	Cluster 5893	2929.0	True	False				False	protein:proph:179064 Length: 422 # NCBI annotation: 7,8-diaminopelargonic acid synthetase # Family: family:all:177 # MgeID: mge:2591 # MgeName: prophinder:45455 # Cross-refs: genbank:acc:YP_001490553;genbank:gi:157737869;genbank:GeneID:5623495	True		False	{'GO:0004015', 'GO:0008483', 'GO:0030170', 'GO:0009102', 'GO:0003824'}		{'GO:0008483', 'GO:0004015', 'GO:0003824', 'GO:0030170'}	{'GO:0009102'}	{'MetaCyc: PWY-5301', 'MetaCyc: PWY-6027', 'Reactome: R-XTR-8964539', 'MetaCyc: PWY-7161', 'MetaCyc: PWY-3841', 'MetaCyc: PWY-7407', 'MetaCyc: PWY-6659', 'MetaCyc: PWY-6200', 'MetaCyc: PWY-5818', 'MetaCyc: PWY-7701', 'Reactome: R-SSC-888590', 'MetaCyc: PWY-7693', 'Reactome: R-BTA-8964540', 'MetaCyc: PWY-7605', 'MetaCyc: PWY-7015', 'MetaCyc: PWY-6160', 'MetaCyc: PWY-7694', 'MetaCyc: PWY-5994', 'Re…	{'IPR015422', 'IPR015421', 'IPR005815', 'IPR005814', 'IPR015424'}	WP_021523832.1 adenosylmethionine--8-amino-7-oxononanoate transaminase [Escherichia coli]		1870
562.22527.con.0005_30|562.22527			Cluster 7960	41.0	False	False				False	protein:proph:179164 Length: 401 # NCBI annotation: hypothetical protein # Family: family:all:2701 # MgeID: mge:2593 # MgeName: prophinder:46475 # Cross-refs: genbank:acc:YP_573421;genbank:gi:92113493;genbank:GeneID:4026777	True		False						{'IPR017642', 'IPR017601'}	WP_001586699.1 DGQHR domain-containing protein [Escherichia coli]		1871
562.22527.con.0005_31|562.22527			Cluster 21074	41.0	False	False				False		False		False							WP_001586700.1 hypothetical protein [Escherichia coli]	True	1872
562.22527.con.0017_1|562.22527			Cluster 41351	43.0	False	False				False		False		False							ELG05232.1 hypothetical protein A1S9_02796 [Escherichia coli KTE50]	True	1873
562.22527.con.0018_48|562.22527	COG0181	H	Cluster 10991	2931.0	True	False				False		False		False	{'GO:0018160', 'GO:0033014', 'GO:0004418'}		{'GO:0004418'}	{'GO:0018160', 'GO:0033014'}	{'KEGG: 00860', 'MetaCyc: PWY-5188', 'KEGG: 01120', 'MetaCyc: PWY-5189', 'Reactome: R-MMU-189451', 'Reactome: R-SCE-189451', 'Reactome: R-BTA-189451', 'KEGG: 01100', 'Reactome: R-RNO-189451', 'Reactome: R-SPO-189451', 'Reactome: R-HSA-189451', 'KEGG: 01110'}	{'IPR022417', 'IPR022418', 'IPR036803', 'IPR000860', 'IPR022419'}	WP_001586482.1 hydroxymethylbilane synthase [Escherichia coli]		1874
562.22527.con.0026_22|562.22527	COG0175	P	Cluster 6617	33.0	False	False				False	protein:proph:169493 Length: 414 # NCBI annotation: hypothetical protein # Family: family:all:402 # MgeID: mge:2327 # MgeName: prophinder:42514 # Cross-refs: genbank:acc:YP_001453459;interpro:IPR002500;genbank:gi:157146140;genbank:GeneID:5584419	True		False	{'GO:0003824'}		{'GO:0003824'}		{'Reactome: R-MMU-8963693', 'Reactome: R-DDI-73817', 'KEGG: 00230', 'Reactome: R-HSA-196807', 'MetaCyc: PWY-5', 'KEGG: 00790', 'Reactome: R-HSA-73817', 'Reactome: R-SCE-5358493', 'KEGG: 00540', 'Reactome: R-DME-538864', 'Reactome: R-RNO-70635', 'Reactome: R-CEL-1483191', 'Reactome: R-HSA-379716', 'KEGG: 04714', 'KEGG: 00740', 'Reactome: R-RNO-611105', 'MetaCyc: PWY-6720', 'MetaCyc: PWY-7206', 'Me…	{'IPR002500', 'IPR014729'}	WP_001001031.1 MULTISPECIES: phosphoadenosine phosphosulfate reductase [Escherichia]		1875
562.22527.con.0026_23|562.22527			Cluster 19141	32.0	False	False			{Erm23S_rRNA_methyltrans}	True	protein:proph:169486 Length: 201 # NCBI annotation: hypothetical protein # Family: family:all:3554 # MgeID: mge:2327 # MgeName: prophinder:42514 # Cross-refs: genbank:acc:YP_001453458;interpro:IPR013217;genbank:gi:157146139;genbank:GeneID:5584341	True		False	{'GO:0008168'}		{'GO:0008168'}		{'MetaCyc: PWY-5301', 'MetaCyc: PWY-6027', 'MetaCyc: PWY-7091', 'MetaCyc: PWY-8007', 'Reactome: R-BTA-71288', 'Reactome: R-DRE-71288', 'MetaCyc: PWY-7161', 'Reactome: R-HSA-9684325', 'MetaCyc: PWY-7407', 'MetaCyc: PWY-6659', 'MetaCyc: PWY-5818', 'MetaCyc: PWY-5110', 'MetaCyc: PWY-7701', 'MetaCyc: PWY-7693', 'MetaCyc: PWY-6906', 'MetaCyc: PWY-7397', 'MetaCyc: PWY-7605', 'Reactome: R-HSA-197264', '…	{'IPR013216', 'IPR029063'}	WP_000205067.1 MULTISPECIES: class I SAM-dependent methyltransferase [Escherichia]		1876
562.22527.con.0027_1|562.22527			Cluster 34129	35.0	False	False				False		False		False							ELI57346.1 hypothetical protein WIO_01167, partial [Escherichia coli KTE125]	True	1877
562.22529.con.0008_2|562.22529	COG4565	T	Cluster 15637	76.0	False	False			{adeR, baeR, vanR}	True		False		False	{'GO:0000160', 'GO:0003700'}		{'GO:0003700'}	{'GO:0000160'}	{'Reactome: R-SPO-3371568', 'MetaCyc: PWY-5491', 'MetaCyc: PWY-46', 'KEGG: 00230', 'MetaCyc: PWY-6686', 'MetaCyc: PWY-7878', 'MetaCyc: PWY-8176', 'MetaCyc: PWY-6456', 'KEGG: 00330', 'MetaCyc: PWY-7881', 'MetaCyc: PWY-7863', 'MetaCyc: PWY-6575', 'MetaCyc: PWY-6689', 'MetaCyc: PWY-6368', 'MetaCyc: PWY-6366', 'MetaCyc: PWY-7366', 'MetaCyc: PWY-7119', 'MetaCyc: PWY-6352', 'Reactome: R-DDI-418555', 'R…	{'IPR001789', 'IPR011006', 'IPR024187'}	ELG51287.1 hypothetical protein A1Y1_02109 [Escherichia coli KTE115]	True	1878
562.22529.con.0049_17|562.22529	COG3328	L	Cluster 18980	39.0	False	False				False	protein:plasmid:117750 Length: 228 # NCBI annotation: transposase # Family: family:all:36 # MgeID: mge:946 # MgeName: pSC138 # Cross-refs: genbank:gi:60115563;genbank:GeneID:3283397	True		False	{'GO:0004803', 'GO:0006313', 'GO:0003677'}		{'GO:0004803', 'GO:0003677'}	{'GO:0006313'}		{'IPR001207'}	ACF88570.1 transposase, Mutator family (plasmid) [Salmonella enterica subsp. enterica serovar Schwarzengrund str. CVM19633]		1879
562.22531.con.0007_118|562.22531			Cluster 9731	33.0	False	False				False		False		False	{'GO:0000166'}		{'GO:0000166'}			{'IPR014976'}	WP_000834167.1 MULTISPECIES: DUF1837 domain-containing protein [Enterobacteriaceae]	True	1880
562.22531.con.0007_119|562.22531	COG1204	L	Cluster 1119	33.0	False	False				False		False		False	{'GO:0005524', 'GO:0003676'}		{'GO:0005524', 'GO:0003676'}		{'Reactome: R-HSA-8856828', 'Reactome: R-DME-2179392', 'MetaCyc: PWY-6027', 'Reactome: R-GGA-68689', 'Reactome: R-RNO-5696400', 'Reactome: R-BTA-73817', 'Reactome: R-MMU-381042', 'Reactome: R-GGA-2871796', 'Reactome: R-HSA-5693565', 'Reactome: R-DME-5610780', 'Reactome: R-DDI-5358565', 'Reactome: R-HSA-9684325', 'MetaCyc: PWY-3841', 'Reactome: R-HSA-1660514', 'MetaCyc: PWY-6659', 'Reactome: R-HSA…	{'IPR001650', 'IPR027417', 'IPR014001', 'IPR011545'}	WP_001093689.1 MULTISPECIES: DEAD/DEAH box helicase [Enterobacteriaceae]		1881
562.22531.con.0026_39|562.22531			Cluster 4566	19.0	False	False				False	protein:plasmid:121340 Length: 484 # NCBI annotation: hypothetical protein # Family: family:all:1641 # MgeID: mge:1915 # MgeName: pRSPA04 # Cross-refs: genbank:gi:146280359;genbank:GeneID:5086546	True		False					{'MetaCyc: PWY-5104', 'Reactome: R-HSA-2995383', 'MetaCyc: PWY-6027', 'MetaCyc: PWY-7407', 'MetaCyc: PWY-5800', 'MetaCyc: PWY-7693', 'MetaCyc: PWY-6389', 'MetaCyc: PWY-6720', 'MetaCyc: PWY-7694', 'MetaCyc: PWY-5994', 'MetaCyc: PWY-8035', 'MetaCyc: PWY-7448', 'MetaCyc: PWY-7670', 'MetaCyc: PWY-5437', 'MetaCyc: PWY-7007', 'MetaCyc: PWY-7352', 'MetaCyc: PWY-7659', 'MetaCyc: PWY-7950', 'MetaCyc: PWY-…	{'IPR039444', 'IPR041486', 'IPR029035'}	WP_032197579.1 hypothetical protein [Escherichia coli]	True	1882
562.22531.con.0049_11|562.22531	COG0394	T	Cluster 24777	29.0	False	False				False	protein:proph:160578 Length: 142 # NCBI annotation: low molecular weight protein-tyrosine-phosphatase Wzb # Family: family:all:187 # MgeID: mge:2067 # MgeName: prophinder:43829 # Cross-refs: genbank:acc:NP_930950;genbank:gi:37527606;genbank:GeneID:2803755	True		False	{'GO:0004725', 'GO:0006470'}		{'GO:0004725'}	{'GO:0006470'}	{'KEGG: 04658', 'MetaCyc: PWY-6421', 'MetaCyc: PWY-6348', 'Reactome: R-HSA-9637628', 'KEGG: 05235', 'KEGG: 04660', 'Reactome: R-HSA-9635465', 'Reactome: R-HSA-9636467', 'MetaCyc: PWY-4202', 'MetaCyc: PWY-4621', 'KEGG: 01100', 'Reactome: R-HSA-9636383', 'KEGG: 00740', 'KEGG: 00730', 'MetaCyc: PWY-8101'}	{'IPR023485', 'IPR036196', 'IPR017867'}	WP_019704361.1 MULTISPECIES: low molecular weight phosphotyrosine protein phosphatase [Enterobacteriaceae]		1887
562.22531.con.0049_3|562.22531	COG2244	M	Cluster 6110	26.0	False	False				False		False		False	{'GO:0016020'}	{'GO:0016020'}				{'IPR002797', 'IPR029303'}	WP_020239504.1 MULTISPECIES: hypothetical protein [Enterobacteriaceae]	True	1883
562.22531.con.0049_4|562.22531			Cluster 11600	25.0	False	False				False		False		False					{'Reactome: R-CEL-913709', 'MetaCyc: PWY-6664', 'MetaCyc: PWY-5800', 'Reactome: R-MMU-4085001', 'MetaCyc: PWY-5818', 'MetaCyc: PWY-7623', 'MetaCyc: PWY-8113', 'MetaCyc: PWY-6051', 'Reactome: R-MMU-190372', 'MetaCyc: PWY-6720', 'Reactome: R-CEL-964739', 'Reactome: R-DME-2022928', 'MetaCyc: PWY-2021', 'MetaCyc: PWY-6687', 'Reactome: R-HSA-2142850', 'MetaCyc: PWY-7487', 'MetaCyc: PWY-7191', 'KEGG: 0…	{'IPR029044', 'IPR008441'}	WP_020239505.1 MULTISPECIES: hypothetical protein [Enterobacteriaceae]	True	1884
562.22531.con.0049_5|562.22531			Cluster 8365	26.0	False	False				False		False		False					{'MetaCyc: PWY-5301', 'MetaCyc: PWY-7091', 'MetaCyc: PWY-6855', 'MetaCyc: PWY-8036', 'MetaCyc: PWY-7161', 'MetaCyc: PWY-5729', 'KEGG: 00531', 'MetaCyc: PWY-7631', 'MetaCyc: PWY-6948', 'MetaCyc: PWY-6795', 'MetaCyc: PWY-6906', 'MetaCyc: PWY-7151', 'MetaCyc: PWY-5748', 'MetaCyc: PWY-5305', 'MetaCyc: PWY-7668', 'KEGG: 00051', 'MetaCyc: PWY-8047', 'MetaCyc: PWY-7133', 'MetaCyc: PWY-7057', 'MetaCyc: P…	{'IPR012334', 'IPR011050'}	WP_020239506.1 MULTISPECIES: hypothetical protein [Enterobacteriaceae]	True	1885
562.22531.con.0049_8|562.22531			Cluster 8134	26.0	False	False				False		False		False							WP_004184817.1 MULTISPECIES: hypothetical protein [Enterobacteriaceae]	True	1886
562.22532.con.0007_134|562.22532	COG0477	G	Cluster 5343	2928.0	True	False			{Chlor_Efflux_Pump, emrB, MFS_efflux, TetA}	True	protein:plasmid:21066 Length: 476 # NCBI annotation: PROBABLE METABOLITE TRANSPORT TRANSMEMBRANE PROTEIN # Family: family:all:10 # MgeID: mge:570 # MgeName: pGMI1000MP # Cross-refs: genbank:acc:NP_521613;genbank:gi:17548273;genbank:GeneID:1222600	True		False	{'GO:0016021', 'GO:0055085', 'GO:0022857'}	{'GO:0016021'}	{'GO:0022857'}	{'GO:0055085'}	{'Reactome: R-RNO-210991', 'Reactome: R-MMU-159418', 'Reactome: R-HSA-8856828', 'Reactome: R-XTR-352230', 'Reactome: R-MMU-5653890', 'Reactome: R-RNO-196757', 'MetaCyc: PWY-6369', 'Reactome: R-HSA-352230', 'Reactome: R-MMU-196819', 'Reactome: R-HSA-442660', 'Reactome: R-HSA-5662702', 'Reactome: R-DME-422356', 'Reactome: R-DME-196836', 'Reactome: R-CEL-428643', 'Reactome: R-HSA-5619070', 'Reactome…	{'IPR005828', 'IPR036259', 'IPR020846'}	WP_001374888.1 MFS transporter [Escherichia coli]		1888
562.22532.con.0013_117|562.22532	COG0382	H	Cluster 12911	2930.0	True	False				False		False		False	{'GO:0016021', 'GO:0016765', 'GO:0004659'}	{'GO:0016021'}	{'GO:0016765', 'GO:0004659'}		{'MetaCyc: PWY-8080', 'MetaCyc: PWY-8084', 'MetaCyc: PWY-5027', 'MetaCyc: PWY-8127', 'MetaCyc: PWY-7407', 'Reactome: R-DRE-6806664', 'MetaCyc: PWY-6659', 'MetaCyc: PWY-3041', 'Reactome: R-MMU-189451', 'Reactome: R-MMU-1268020', 'MetaCyc: PWY-6403', 'MetaCyc: PWY-7605', 'MetaCyc: PWY-5856', 'MetaCyc: PWY-4502', 'MetaCyc: PWY-6160', 'Reactome: R-SPO-2142789', 'MetaCyc: PWY-5892', 'Reactome: R-DDI-1…	{'IPR006370', 'IPR039653', 'IPR030470', 'IPR000537'}	WP_000455223.1 4-hydroxybenzoate octaprenyltransferase [Escherichia coli]		1889
562.22535.con.0003_314|562.22535			Cluster 34879	11.0	False	False				False	protein:plasmid:136996 Length: 95 # NCBI annotation: IS1400 transposase A # Family: family:all:106 # MgeID: mge:1830 # MgeName: pYVe8081 # Cross-refs: genbank:gi:122815792;genbank:GeneID:4711880	True		False	{'GO:0004803', 'GO:0006313', 'GO:0003677'}		{'GO:0004803', 'GO:0003677'}	{'GO:0006313'}		{'IPR002514'}	WP_077951528.1 MULTISPECIES: low calcium response protein S [Enterobacteriaceae]		1890
562.22535.con.0019_34|562.22535			Cluster 21875	35.0	False	False				False		False		False						{'IPR019690'}	WP_000263317.1 MULTISPECIES: DUF2569 domain-containing protein [Escherichia]	True	1891
562.22535.con.0046_9|562.22535			Cluster 10734	64.0	False	False				False	protein:plasmid:157659 Length: 237 # NCBI annotation: mobilization protein B # Family: family:all:134 # MgeID: mge:813 # MgeName: pCCK381 # Cross-refs: genbank:gi:63219718;genbank:GeneID:3362477	True		False	{'GO:0003677', 'GO:0006310'}		{'GO:0003677'}	{'GO:0006310'}		{'IPR001668'}	WP_000852935.1 MULTISPECIES: plasmid recombination enzyme [Gammaproteobacteria]		1892
562.22542.con.0037_5|562.22542			Cluster 40714	22.0	False	False				False		False		False							ELH54207.1 hypothetical protein A15E_02782 [Escherichia coli KTE202]	True	1893
562.22542.con.0039_5|562.22542	COG1192	D	Cluster 15491	2837.0	False	False				False		False		False					{'Reactome: R-HSA-8856828', 'Reactome: R-DME-2179392', 'MetaCyc: PWY-6027', 'Reactome: R-GGA-68689', 'Reactome: R-RNO-5696400', 'Reactome: R-BTA-73817', 'Reactome: R-MMU-381042', 'Reactome: R-GGA-2871796', 'Reactome: R-HSA-5693565', 'Reactome: R-DME-5610780', 'Reactome: R-DDI-5358565', 'Reactome: R-HSA-9684325', 'MetaCyc: PWY-3841', 'Reactome: R-HSA-1660514', 'MetaCyc: PWY-6659', 'Reactome: R-HSA…	{'IPR027417', 'IPR017746'}	WP_115431591.1 cellulose biosynthesis protein BcsQ [Escherichia coli]		1894
562.22547.con.0005_5|562.22547	COG0732	V	Cluster 6782	18.0	False	False				False	protein:proph:167100 Length: 419 # NCBI annotation: type I site-specific restriction-modification system, S (specificity) subunit # Family: family:all:128 # MgeID: mge:2261 # MgeName: prophinder:47495 # Cross-refs: genbank:acc:YP_001620583;genbank:gi:162447451;genbank:GeneID:5803936	True		False	{'GO:0003677', 'GO:0006304'}		{'GO:0003677'}	{'GO:0006304'}		{'IPR000055'}	WP_000063698.1 restriction endonuclease subunit S [Escherichia coli]		1895
562.22547.con.0089_1|562.22547	COG3344	L	Cluster 3332	61.0	False	False				False	protein:plasmid:16116 Length: 574 # NCBI annotation: reverse transcriptase # Family: family:all:85 # MgeID: mge:373 # MgeName: pO157 # Cross-refs: genbank:acc:NP_052642;genbank:gi:10955301;genbank:GeneID:1789698	True		False	{'GO:0004519', 'GO:0003676'}		{'GO:0004519', 'GO:0003676'}		{'MetaCyc: PWY-5301', 'MetaCyc: PWY-6027', 'Reactome: R-RNO-5696400', 'MetaCyc: PWY-7161', 'Reactome: R-HSA-9684325', 'MetaCyc: PWY-7407', 'MetaCyc: PWY-7693', 'Reactome: R-MMU-174417', 'Reactome: R-HSA-110312', 'MetaCyc: PWY-7694', 'MetaCyc: PWY-5994', 'MetaCyc: PWY-7705', 'Reactome: R-HSA-162594', 'MetaCyc: PWY-8035', 'MetaCyc: PWY-8100', 'Reactome: R-CEL-69091', 'MetaCyc: PWY-7448', 'MetaCyc: …	{'IPR000477', 'IPR030931', 'IPR025960', 'IPR013597', 'IPR043502', 'IPR003615', 'IPR002711'}	WP_071688227.1 group II intron reverse transcriptase/maturase [Escherichia coli]		1896
562.22548.con.0009_51|562.22548	COG1199	L	Cluster 1230	6.0	False	False				False	protein:plasmid:29332 Length: 841 # NCBI annotation: hypothetical protein # Family: family:all:1784 # MgeID: mge:656 # MgeName: SCP1 # Cross-refs: genbank:acc:NP_639807;genbank:gi:21234200;genbank:GeneID:1095283	True		False	{'GO:0005524', 'GO:0003676', 'GO:0004386', 'GO:0016787', 'GO:0016818', 'GO:0003677', 'GO:0006139'}		{'GO:0005524', 'GO:0003676', 'GO:0004386', 'GO:0016787', 'GO:0016818', 'GO:0003677'}	{'GO:0006139'}	{'Reactome: R-HSA-8856828', 'Reactome: R-DME-2179392', 'MetaCyc: PWY-6027', 'Reactome: R-GGA-68689', 'Reactome: R-RNO-5696400', 'Reactome: R-BTA-73817', 'Reactome: R-MMU-381042', 'Reactome: R-GGA-2871796', 'Reactome: R-HSA-5693565', 'Reactome: R-DME-5610780', 'Reactome: R-DDI-5358565', 'Reactome: R-HSA-9684325', 'MetaCyc: PWY-3841', 'Reactome: R-HSA-1660514', 'MetaCyc: PWY-6659', 'Reactome: R-HSA…	{'IPR027417', 'IPR006935', 'IPR014001', 'IPR006555'}	WP_115202579.1 DEAD/DEAH box helicase [Escherichia coli]		1897
562.22548.con.0070_11|562.22548	COG0270	L	Cluster 3189	222.0	False	False				False	protein:plasmid:137094 Length: 566 # NCBI annotation: hypothetical protein # Family: family:all:83 # MgeID: mge:1948 # MgeName: pLEW517 # Cross-refs: genbank:gi:133756232;genbank:GeneID:4924707	True		False	{'GO:0008168'}		{'GO:0008168'}		{'MetaCyc: PWY-5301', 'MetaCyc: PWY-6027', 'MetaCyc: PWY-7091', 'MetaCyc: PWY-8007', 'Reactome: R-BTA-71288', 'Reactome: R-DRE-71288', 'MetaCyc: PWY-7161', 'Reactome: R-HSA-9684325', 'MetaCyc: PWY-7407', 'MetaCyc: PWY-6659', 'MetaCyc: PWY-5818', 'MetaCyc: PWY-5110', 'MetaCyc: PWY-7701', 'MetaCyc: PWY-7693', 'MetaCyc: PWY-6906', 'MetaCyc: PWY-7397', 'MetaCyc: PWY-7605', 'Reactome: R-HSA-197264', '…	{'IPR031303', 'IPR040743', 'IPR029063', 'IPR001525', 'IPR018117'}	WP_001366189.1 DNA cytosine methyltransferase [Escherichia coli]		1898
562.22548.con.0111_1|562.22548	COG0175	P	Cluster 12355	11.0	False	False				False	protein:vir:3473 Length: 290 # NCBI annotation: Nin protein # Family: family:all:402 # MgeID: mge:70 # MgeName: lambda # Cross-refs: genbank:acc:NP_040635;genbank:gi:9626299;genbank:GeneID:2703498	True		False	{'GO:0003824'}		{'GO:0003824'}		{'Reactome: R-MMU-8963693', 'Reactome: R-DDI-73817', 'KEGG: 00230', 'Reactome: R-HSA-196807', 'MetaCyc: PWY-5', 'KEGG: 00790', 'Reactome: R-HSA-73817', 'Reactome: R-SCE-5358493', 'KEGG: 00540', 'Reactome: R-DME-538864', 'Reactome: R-RNO-70635', 'Reactome: R-CEL-1483191', 'Reactome: R-HSA-379716', 'KEGG: 04714', 'KEGG: 00740', 'Reactome: R-RNO-611105', 'MetaCyc: PWY-6720', 'MetaCyc: PWY-7206', 'Me…	{'IPR002500', 'IPR014729'}	EIH25203.1 phosphoadenosine phosphosulfate reductase family protein [Escherichia coli 1.2264]		1899
562.22556.con.0001_59|562.22556			Cluster 26461	15.0	False	False				False		False		False							WP_000237094.1 MULTISPECIES: hypothetical protein [Escherichia]	True	1900
562.22559.con.0002_273|562.22559			Cluster 40234	15.0	False	False				False		False		False							YP_009207653.1 hypothetical protein pro147_32 [Escherichia phage pro147]	True	1901
562.22559.con.0003_58|562.22559	COG1376	S	Cluster 10782	2924.0	True	False				False	protein:plasmid:118459 Length: 199 # NCBI annotation: ErfK/YbiS/YcfS/YnhG # Family: family:all:884 # MgeID: mge:1042 # MgeName: 1 # Cross-refs: genbank:gi:110347210;interpro:IPR005490;genbank:GeneID:4178677	True		False	{'GO:0016740'}		{'GO:0016740'}		{'MetaCyc: PWY-7730', 'MetaCyc: PWY-6737', 'MetaCyc: PWY-6558', 'MetaCyc: PWY-7056', 'MetaCyc: PWY-8119', 'MetaCyc: PWY-7091', 'MetaCyc: PWY-6855', 'MetaCyc: PWY-7002', 'MetaCyc: PWY-7599', 'MetaCyc: PWY-7822', 'MetaCyc: PWY-7134', 'MetaCyc: PWY-7445', 'MetaCyc: PWY-6527', 'MetaCyc: PWY-6749', 'MetaCyc: PWY-7521', 'MetaCyc: PWY-6289', 'MetaCyc: PWY-6190', 'MetaCyc: PWY-6906', 'MetaCyc: PWY-6784',…	{'IPR018392', 'IPR038063', 'IPR005490', 'IPR041597'}	WP_001370797.1 LysM peptidoglycan-binding domain-containing protein [Escherichia coli]		1902
562.22565.con.0035_43|562.22565			Cluster 36349	9.0	False	False				False		False		False							WP_001064716.1 MULTISPECIES: hypothetical protein [Escherichia]	True	1903
562.22566.con.0005_217|562.22566	COG3726	S	Cluster 3231	2931.0	True	False				False		False		False	{'GO:0006464', 'GO:0009249', 'GO:0016979'}		{'GO:0016979'}	{'GO:0006464', 'GO:0009249'}	{'MetaCyc: PWY-6032', 'MetaCyc: PWY-6314', 'MetaCyc: PWY-8075', 'MetaCyc: PWY-7702', 'MetaCyc: PWY-6027', 'MetaCyc: PWY-7050', 'KEGG: 00785', 'MetaCyc: PWY-8084', 'MetaCyc: PWY-8036', 'MetaCyc: PWY-7407', 'MetaCyc: PWY-5903', 'MetaCyc: PWY-8166', 'MetaCyc: PWY-6948', 'MetaCyc: PWY-7693', 'MetaCyc: PWY-7470', 'MetaCyc: PWY-8055', 'MetaCyc: PWY-7656', 'MetaCyc: PWY-7168', 'KEGG: 00780', 'MetaCyc: P…	{'IPR004143', 'IPR019305', 'IPR023741', 'IPR019491', 'IPR004562'}	WP_021515222.1 YtjB family periplasmic protein [Escherichia coli]		1904
562.22566.con.0046_10|562.22566	COG4974	L	Cluster 8458	1110.0	False	False				False	protein:plasmid:115877 Length: 337 # NCBI annotation: IntI1 DNA integrase # Family: family:all:2 # MgeID: mge:756 # MgeName: Rms149 # Cross-refs: genbank:gi:66968565;genbank:GeneID:3399421	True		False	{'GO:0015074', 'GO:0003677', 'GO:0006310'}		{'GO:0003677'}	{'GO:0015074', 'GO:0006310'}	{'MetaCyc: PWY-8179', 'MetaCyc: PWY-8117', 'MetaCyc: PWY-6749', 'Reactome: R-SPO-4615885', 'MetaCyc: PWY-7735', 'MetaCyc: PWY-7127', 'Reactome: R-CEL-4615885', 'Reactome: R-HSA-4615885', 'Reactome: R-DDI-4615885', 'MetaCyc: PWY-6626', 'Reactome: R-MMU-4615885', 'Reactome: R-RNO-4615885', 'MetaCyc: PWY-7419', 'MetaCyc: PWY-7904', 'Reactome: R-SCE-4615885', 'MetaCyc: PWY-6955', 'MetaCyc: PWY-7888',…	{'IPR013762', 'IPR010998', 'IPR002104', 'IPR044068', 'IPR011946', 'IPR004107', 'IPR011010'}	WP_000845049.1 MULTISPECIES: class 1 integron integrase IntI1 [Enterobacteriaceae]		1905
562.22567.con.0004_143|562.22567	COG4303	E	Cluster 4995	2913.0	True	False				False	protein:plasmid:23125 Length: 463 # NCBI annotation: hypothetical protein # Family: family:all:22300 # MgeID: mge:573 # MgeName: pRi1724 # Cross-refs: genbank:acc:NP_066639;genbank:gi:10954704;genbank:GeneID:874774	True		False	{'GO:0003824', 'GO:0006520', 'GO:0008851'}		{'GO:0003824', 'GO:0008851'}	{'GO:0006520'}	{'Reactome: R-DDI-70350', 'MetaCyc: PWY-5301', 'Reactome: R-RNO-71336', 'MetaCyc: PWY-7091', 'Reactome: R-DDI-6798695', 'Reactome: R-HSA-6791055', 'MetaCyc: PWY-7862', 'Reactome: R-BTA-73817', 'MetaCyc: PWY-7161', 'Reactome: R-HSA-73817', 'MetaCyc: PWY-5800', 'Reactome: R-MMU-4085001', 'MetaCyc: PWY-5818', 'MetaCyc: PWY-6906', 'Reactome: R-HSA-77111', 'Reactome: R-DDI-70171', 'Reactome: R-HSA-197…	{'IPR010628', 'IPR013785'}	WP_032177536.1 ethanolamine ammonia-lyase subunit EutB [Escherichia coli]		1906
562.22567.con.0038_29|562.22567			Cluster 16402	42.0	False	False				False	protein:vir:95333 Length: 191 # NCBI annotation: eae-like protein # Family: family:all:67 # MgeID: mge:1564 # MgeName: phiV10 # Cross-refs: genbank:acc:YP_512301;genbank:gi:89152462;genbank:GeneID:3953002	True		False						{'IPR025153'}	WP_074561950.1 ead/Ea22-like family protein [Escherichia coli]		1907
562.22567.con.0082_1|562.22567			Cluster 14449	71.0	False	False				False	protein:plasmid:125608 Length: 246 # NCBI annotation: w0043 # Family: family:all:5835 # MgeID: mge:1922 # MgeName: pSFO157 # Cross-refs: genbank:gi:149930787;genbank:GeneID:5290925	True		False						{'IPR026001', 'IPR040508'}	EFI87607.1 hypothetical protein HMPREF9551_03412, partial [Escherichia coli MS 196-1]	True	1908
562.22568.con.0007_113|562.22568			Cluster 39807	13.0	False	False				False		False		False							ERA28085.1 hypothetical protein H000_04638 [Escherichia coli UMEA 3899-1]	True	1909
562.22577.con.0023_3|562.22577			Cluster 33099	251.0	False	False				False	protein:proph:164898 Length: 83 # NCBI annotation: hypothetical protein # Family: family:all:23895 # MgeID: mge:2193 # MgeName: prophinder:43110 # Cross-refs: genbank:acc:YP_001335055;genbank:gi:152969946;genbank:GeneID:5341375	True		False							WP_000476209.1 hypothetical protein [Escherichia coli]	True	1910
562.22578.con.0061_5|562.22578			Cluster 20486	81.0	False	False				False	protein:proph:172423 Length: 92 # NCBI annotation: hypothetical protein # Family: family:all:6667 # MgeID: mge:2407 # MgeName: prophinder:43323 # Cross-refs: genbank:acc:NP_308850;genbank:gi:15830077;genbank:GeneID:917563	True		False							EQO79893.1 hypothetical protein G721_04171 [Escherichia coli HVH 46 (4-2758776)]	True	1911
562.22578.con.0062_8|562.22578			Cluster 11915	40.0	False	False				False	protein:plasmid:151298 Length: 232 # NCBI annotation: hypothetical protein # Family: family:all:19757 # MgeID: mge:1084 # MgeName: pCoo # Cross-refs: genbank:gi:83404804;genbank:GeneID:3829336	True		False							WP_001415483.1 MULTISPECIES: hypothetical protein [Enterobacteriaceae]	True	1912
562.22580.con.0019_43|562.22580			Cluster 29809	11.0	False	False				False		False		False							WP_016262434.1 MULTISPECIES: hypothetical protein [Enterobacteriaceae]	True	1913
562.22584.con.0006_59|562.22584	COG0375	O	Cluster 26328	2925.0	True	False				False	protein:plasmid:149465 Length: 113 # NCBI annotation: HypA2 # Family: family:all:3091 # MgeID: mge:823 # MgeName: pHG1 # Cross-refs: genbank:gi:38637759;genbank:GeneID:2656548	True		False	{'GO:0051604', 'GO:0016151'}		{'GO:0016151'}	{'GO:0051604'}		{'IPR039002', 'IPR020538', 'IPR000688'}	ABJ02495.1 protein involved with the maturation of hydrogenases 1 and 2 [Escherichia coli APEC O1]		1914
562.22586.con.0003_155|562.22586	COG0322	L	Cluster 12484	2925.0	True	False				False		False		False					{'Reactome: R-RNO-6783310', 'Reactome: R-MMU-6783310', 'Reactome: R-BTA-6783310', 'Reactome: R-HSA-5693568', 'Reactome: R-BTA-5693568', 'Reactome: R-RNO-5693568', 'Reactome: R-HSA-6783310', 'Reactome: R-MMU-5693568'}	{'IPR035901', 'IPR000305'}	WP_032164838.1 excinuclease Cho [Escherichia coli]		1915
562.22588.con.0022_43|562.22588			Cluster 3190	15.0	False	False				False	protein:proph:161577 Length: 583 # NCBI annotation: hypothetical protein # Family: family:all:2619 # MgeID: mge:2095 # MgeName: prophinder:46218 # Cross-refs: genbank:acc:NP_461652;genbank:gi:16766037;genbank:GeneID:1254247	True		False						{'IPR018891'}	WP_061362269.1 AIPR family protein [Escherichia coli]		1916
562.22588.con.0037_2|562.22588	COG1211	I	Cluster 4495	117.0	False	False				False	protein:plasmid:155373 Length: 269 # NCBI annotation: short-chain dehydrogenase/reductase SDR # Family: family:all:8 # MgeID: mge:1994 # MgeName: pNL2 # Cross-refs: genbank:gi:146275658;interpro:IPR001509;interpro:IPR002198;interpro:IPR002347;interpro:IPR002424;genbank:GeneID:5077581	True		False	{'GO:0016491', 'GO:0055114', 'GO:0008299', 'GO:0070567', 'GO:0050518'}		{'GO:0050518', 'GO:0016491', 'GO:0070567'}	{'GO:0008299', 'GO:0055114'}	{'MetaCyc: PWY-6027', 'MetaCyc: PWY-6664', 'MetaCyc: PWY-7862', 'MetaCyc: PWY-3841', 'MetaCyc: PWY-6659', 'MetaCyc: PWY-7693', 'Reactome: R-HSA-77111', 'MetaCyc: PWY-7605', 'Reactome: R-DDI-70171', 'MetaCyc: PWY-6654', 'MetaCyc: PWY-6160', 'MetaCyc: PWY-6051', 'MetaCyc: PWY-7341', 'MetaCyc: PWY-6720', 'MetaCyc: PWY-5994', 'MetaCyc: PWY-7057', 'MetaCyc: PWY-8035', 'KEGG: 00472', 'Reactome: R-RNO-7…	{'IPR012115', 'IPR029044', 'IPR020904', 'IPR001228', 'IPR002347', 'IPR034683', 'IPR036291'}	CDN83685.1 hypothetical protein EC958_3340 [Escherichia coli O25b:H4-ST131]	True	1917
562.22588.con.0051_5|562.22588			Cluster 22293	8.0	False	False				False		False		False							WP_029402452.1 hypothetical protein [Escherichia coli]	True	1918
562.22588.con.0051_6|562.22588			Cluster 39673	8.0	False	False				False		False		False							EMU56078.1 hypothetical protein ECMP02155211_4744 [Escherichia coli MP021552.11]	True	1919
562.22588.con.0051_7|562.22588			Cluster 27726	8.0	False	False				False		False		False							EMU64541.1 hypothetical protein ECMP02155212_5066 [Escherichia coli MP021552.12]	True	1920
562.22592.con.0005_237|562.22592	COG2814	G	Cluster 3768	2912.0	True	True	emrY	3000254.0	{Chlor_Efflux_Pump, emrB, MFS_efflux, norA, TetA, tet_MFS_efflux}	True	protein:plasmid:145452 Length: 520 # NCBI annotation: Drug resistance transporter EmrB/QacA subfamily # Family: family:all:10 # MgeID: mge:1006 # MgeName: megaplasmid # Cross-refs: genbank:gi:72384020;interpro:IPR004638;interpro:IPR007114;interpro:IPR011701;genbank:GeneID:3607833	True		False	{'GO:0016021', 'GO:0055085', 'GO:0022857'}	{'GO:0016021'}	{'GO:0022857'}	{'GO:0055085'}	{'Reactome: R-RNO-210991', 'Reactome: R-MMU-159418', 'Reactome: R-HSA-8856828', 'Reactome: R-XTR-352230', 'Reactome: R-MMU-5653890', 'Reactome: R-RNO-196757', 'MetaCyc: PWY-6369', 'Reactome: R-HSA-352230', 'Reactome: R-MMU-196819', 'Reactome: R-HSA-442660', 'Reactome: R-HSA-5662702', 'Reactome: R-DME-422356', 'Reactome: R-DME-196836', 'Reactome: R-CEL-428643', 'Reactome: R-HSA-5619070', 'Reactome…	{'IPR036259', 'IPR011701', 'IPR004638', 'IPR020846'}	WP_001018723.1 multidrug efflux MFS transporter permease subunit EmrY [Escherichia coli]		1921
562.22595.con.0077_10|562.22595	COG2214	O	Cluster 11972	194.0	False	False				False	protein:plasmid:110347 Length: 170 # NCBI annotation: DnaJ-like protein # Family: family:all:2891 # MgeID: mge:720 # MgeName: pF1947 # Cross-refs: genbank:gi:71558959;genbank:GeneID:3523486	True		False					{'Reactome: R-HSA-8856828', 'Reactome: R-HSA-3371497', 'Reactome: R-XTR-3371453', 'Reactome: R-BTA-6798695', 'Reactome: R-MMU-72163', 'Reactome: R-MMU-1268020', 'Reactome: R-DDI-3371497', 'KEGG: 04714', 'Reactome: R-MMU-8856828', 'Reactome: R-SPO-3371453', 'Reactome: R-RNO-432722', 'Reactome: R-HSA-72163', 'Reactome: R-MMU-432722', 'Reactome: R-DRE-3371453', 'Reactome: R-SCE-1362409', 'Reactome: …	{'IPR001623', 'IPR036869'}	WP_012599850.1 J domain-containing protein [Escherichia coli]		1922
562.22599.con.0020_26|562.22599	COG2337	T	Cluster 23672	1110.0	False	False				False	protein:plasmid:158826 Length: 110 # NCBI annotation: PemK # Family: family:all:532 # MgeID: mge:738 # MgeName: pU302L # Cross-refs: genbank:gi:58383310;genbank:GeneID:3259825	True		False	{'GO:0003677'}		{'GO:0003677'}			{'IPR003477', 'IPR011067'}	STB29750.1 post-segregation toxin PemK [Citrobacter koseri]		1923
562.22600.con.0039_26|562.22600	COG2215	P	Cluster 8089	43.0	False	False				False	protein:plasmid:20412 Length: 429 # NCBI annotation: putative transmembrane protein # Family: family:all:1606 # MgeID: mge:560 # MgeName: pWW0 # Cross-refs: genbank:acc:NP_542891;swissprot:trembl:q8vmi1;genbank:gi:18150954;goa:Q8VMI1;interpro:IPR011541;uniprot:Q8VMI1;genbank:GeneID:3353826	True		False	{'GO:0005887', 'GO:0015099', 'GO:0035444'}	{'GO:0005887'}	{'GO:0015099'}	{'GO:0035444'}		{'IPR011541'}	WP_029602872.1 MULTISPECIES: nickel/cobalt efflux protein RcnA [Enterobacterales]		1925
562.22600.con.0039_6|562.22600	COG3505	U	Cluster 15921	67.0	False	False				False	protein:plasmid:151036 Length: 244 # NCBI annotation: TraL # Family: family:all:100 # MgeID: mge:977 # MgeName: pMUR050 # Cross-refs: genbank:gi:113706770;genbank:GeneID:4246780	True		False					{'MetaCyc: PWY-6737', 'Reactome: R-SSC-5653890', 'MetaCyc: PWY-7056', 'Reactome: R-RNO-6803157', 'Reactome: R-MMU-6803157', 'MetaCyc: PWY-7450', 'MetaCyc: PWY-6385', 'MetaCyc: PWY-6855', 'MetaCyc: PWY-7091', 'Reactome: R-MMU-5653890', 'Reactome: R-BTA-6798695', 'MetaCyc: PWY-7822', 'MetaCyc: PWY-7134', 'MetaCyc: PWY-7445', 'MetaCyc: PWY-5800', 'MetaCyc: PWY-6527', 'MetaCyc: PWY-6749', 'MetaCyc: P…	{'IPR008258', 'IPR023346'}	WP_013279384.1 MULTISPECIES: conjugal transfer protein [Enterobacterales]		1924
562.22600.con.0045_10|562.22600			Cluster 3333	53.0	False	False				False	protein:plasmid:151021 Length: 513 # NCBI annotation: hypothetical protein # Family: family:all:91 # MgeID: mge:977 # MgeName: pMUR050 # Cross-refs: genbank:gi:116536720;genbank:GeneID:4246765	True		False	{'GO:0004803', 'GO:0006313', 'GO:0003677'}		{'GO:0004803', 'GO:0003677'}	{'GO:0006313'}	{'Reactome: R-HSA-8856828', 'Reactome: R-DME-2179392', 'MetaCyc: PWY-6027', 'Reactome: R-GGA-68689', 'Reactome: R-RNO-5696400', 'Reactome: R-BTA-73817', 'Reactome: R-MMU-381042', 'Reactome: R-GGA-2871796', 'Reactome: R-HSA-5693565', 'Reactome: R-DME-5610780', 'Reactome: R-DDI-5358565', 'Reactome: R-HSA-9684325', 'MetaCyc: PWY-3841', 'Reactome: R-HSA-1660514', 'MetaCyc: PWY-6659', 'Reactome: R-HSA…	{'IPR008868', 'IPR027417', 'IPR007069'}	WP_000344783.1 MULTISPECIES: hypothetical protein [Enterobacteriaceae]	True	1926
562.22600.con.0051_4|562.22600			Cluster 20781	38.0	False	False				False		False		False							WP_012561123.1 hypothetical protein [Klebsiella pneumoniae]	True	1927
562.22605.con.0041_6|562.22605	COG0732	V	Cluster 6246	9.0	False	False				False		False		False	{'GO:0003677', 'GO:0006304'}		{'GO:0003677'}	{'GO:0006304'}		{'IPR000055'}	WP_032183208.1 restriction endonuclease subunit S [Escherichia coli]		1928
562.22607.con.0005_102|562.22607	COG0693	R	Cluster 21075	2469.0	False	False				False	protein:plasmid:25841 Length: 195 # NCBI annotation: hypothetical protein # Family: family:all:1348 # MgeID: mge:607 # MgeName: pSymA # Cross-refs: genbank:acc:NP_435392;genbank:gi:16262599;genbank:GeneID:1235371	True		False					{'MetaCyc: PWY-6027', 'MetaCyc: PWY-7091', 'Reactome: R-DDI-6798695', 'Reactome: R-HSA-73817', 'MetaCyc: PWY-7407', 'MetaCyc: PWY-5800', 'Reactome: R-DRE-499943', 'MetaCyc: PWY-7693', 'MetaCyc: PWY-6906', 'Reactome: R-DME-9646399', 'MetaCyc: PWY-7052', 'MetaCyc: PWY-6720', 'Reactome: R-HSA-499943', 'MetaCyc: PWY-7694', 'MetaCyc: PWY-5994', 'MetaCyc: PWY-7057', 'MetaCyc: PWY-8035', 'KEGG: 00600', …	{'IPR002818', 'IPR006286', 'IPR029062'}	EGI49622.1 protein YhbO [Escherichia coli H299]		1929
562.22607.con.0042_30|562.22607			Cluster 10994	496.0	False	False				False	protein:plasmid:158916 Length: 283 # NCBI annotation: replication protein C # Family: family:all:1294 # MgeID: mge:738 # MgeName: pU302L # Cross-refs: genbank:gi:58383272;genbank:GeneID:3259921	True		False						{'IPR010522'}	WP_000240537.1 MULTISPECIES: replication protein C [Enterobacterales]		1930
562.22612.con.0043_4|562.22612			Cluster 35076	16.0	False	False				False		False		False	{'GO:0003677'}		{'GO:0003677'}		{'MetaCyc: PWY-8179', 'MetaCyc: PWY-8117', 'MetaCyc: PWY-6749', 'Reactome: R-SPO-4615885', 'MetaCyc: PWY-7735', 'MetaCyc: PWY-7127', 'Reactome: R-CEL-4615885', 'Reactome: R-HSA-4615885', 'Reactome: R-DDI-4615885', 'MetaCyc: PWY-6626', 'Reactome: R-MMU-4615885', 'Reactome: R-RNO-4615885', 'MetaCyc: PWY-7419', 'MetaCyc: PWY-7904', 'Reactome: R-SCE-4615885', 'MetaCyc: PWY-6955', 'MetaCyc: PWY-7888',…	{'IPR011010'}	WP_001610791.1 hypothetical protein [Escherichia coli]	True	1931
562.22614.con.0012_108|562.22614	COG2234	R	Cluster 8829	2930.0	True	False				False		False		False					{'Reactome: R-HSA-8856828', 'MetaCyc: PWY-8119', 'Reactome: R-MMU-8963693', 'Reactome: R-DDI-6798695', 'Reactome: R-HSA-8856825', 'Reactome: R-RNO-8963693', 'KEGG: 00250', 'Reactome: R-MMU-8856825', 'Reactome: R-HSA-6798695', 'Reactome: R-RNO-8856825', 'Reactome: R-MMU-917977', 'Reactome: R-MMU-8856828', 'Reactome: R-RNO-917977', 'MetaCyc: PWY-7694', 'MetaCyc: PWY-7954', 'Reactome: R-RNO-432722',…	{'IPR007484'}	WP_000490440.1 MULTISPECIES: aminopeptidase [Enterobacteriaceae]		1932
562.22618.con.0001_2|562.22618	COG0582	L	Cluster 6384	26.0	False	False				False	protein:vir:507 Length: 439 # NCBI annotation: integrase # Family: family:all:2 # MgeID: mge:12 # MgeName: P4 # Cross-refs: genbank:acc:NP_042035;swissprot:sw:p08320;genbank:gi:9627511;goa:P08320;uniprot:P08320;genbank:GeneID:1261092	True		False	{'GO:0015074', 'GO:0003677', 'GO:0006310'}		{'GO:0003677'}	{'GO:0015074', 'GO:0006310'}	{'MetaCyc: PWY-8179', 'MetaCyc: PWY-8117', 'MetaCyc: PWY-6749', 'Reactome: R-SPO-4615885', 'MetaCyc: PWY-7735', 'MetaCyc: PWY-7127', 'Reactome: R-CEL-4615885', 'Reactome: R-HSA-4615885', 'Reactome: R-DDI-4615885', 'MetaCyc: PWY-6626', 'Reactome: R-MMU-4615885', 'Reactome: R-RNO-4615885', 'MetaCyc: PWY-7419', 'MetaCyc: PWY-7904', 'Reactome: R-SCE-4615885', 'MetaCyc: PWY-6955', 'MetaCyc: PWY-7888',…	{'IPR013762', 'IPR010998', 'IPR002104', 'IPR044068', 'IPR038488', 'IPR025166', 'IPR011010'}	WP_072693178.1 DUF4102 domain-containing protein [Escherichia coli]	True	1933
562.22618.con.0002_76|562.22618	COG3025	S	Cluster 5802	2930.0	True	False				False		False		False	{'GO:0050355'}		{'GO:0050355'}		{'MetaCyc: PWY-6147', 'KEGG: 00230', 'Reactome: R-HSA-196819', 'Reactome: R-MMU-196819', 'MetaCyc: PWY-7539', 'KEGG: 00983', 'KEGG: 00730', 'MetaCyc: PWY-6502', 'KEGG: 00240', 'MetaCyc: PWY-7821', 'MetaCyc: PWY-7193', 'MetaCyc: PWY-7206', 'MetaCyc: PWY-5757', 'MetaCyc: PWY-7369', 'MetaCyc: PWY-7419', 'MetaCyc: PWY-7807', 'KEGG: 00190', 'KEGG: 01100', 'MetaCyc: PWY-7805', 'MetaCyc: PWY-6383', 'Rea…	{'IPR033469', 'IPR039013', 'IPR023577', 'IPR007899'}	WP_000046247.1 MULTISPECIES: inorganic triphosphatase [Escherichia]		1934
562.22618.con.0004_17|562.22618	COG1760	E	Cluster 5206	20.0	False	False				False	protein:plasmid:21059 Length: 461 # NCBI annotation: PROBABLE L-SERINE DEHYDRATASE (L-SERINE DEAMINASE) PROTEIN # Family: family:all:3604 # MgeID: mge:570 # MgeName: pGMI1000MP # Cross-refs: genbank:acc:NP_521606;genbank:gi:17548266;genbank:GeneID:1222593	True		False	{'GO:0003941', 'GO:0051539', 'GO:0006094'}		{'GO:0003941', 'GO:0051539'}	{'GO:0006094'}	{'KEGG: 00710', 'KEGG: 01120', 'MetaCyc: PWY-5392', 'MetaCyc: PWY-7383', 'Reactome: R-SSC-977347', 'MetaCyc: PWY-6728', 'KEGG: 00270', 'KEGG: 00720', 'MetaCyc: PWY-561', 'KEGG: 00020', 'Reactome: R-MMU-977347', 'KEGG: 00680', 'KEGG: 00260', 'Reactome: R-HSA-977347', 'MetaCyc: PWY-8010', 'KEGG: 01100', 'MetaCyc: PWY-6969', 'MetaCyc: PWY-1622', 'Reactome: R-RNO-977347', 'KEGG: 01110', 'MetaCyc: PWY…	{'IPR005131', 'IPR005130', 'IPR004644', 'IPR029009'}	RDR46886.1 L-serine dehydratase TdcG [Escherichia coli]		1935
562.22618.con.0005_155|562.22618	COG0286	V	Cluster 4254	27.0	False	False				False	protein:proph:172151 Length: 504 # NCBI annotation: type I restriction-modification system methylation subunit-like # Family: family:all:384 # MgeID: mge:2398 # MgeName: prophinder:44778 # Cross-refs: genbank:acc:YP_389915;interpro:IPR002052;interpro:IPR002296;genbank:gi:78358466;genbank:GeneID:3758404	True		False	{'GO:0032259', 'GO:0003676', 'GO:0008170', 'GO:0006306', 'GO:0008168', 'GO:0003677'}		{'GO:0003676', 'GO:0008170', 'GO:0003677', 'GO:0008168'}	{'GO:0032259', 'GO:0006306'}	{'MetaCyc: PWY-5301', 'MetaCyc: PWY-6027', 'MetaCyc: PWY-7091', 'MetaCyc: PWY-8007', 'Reactome: R-BTA-71288', 'Reactome: R-DRE-71288', 'MetaCyc: PWY-7161', 'Reactome: R-HSA-9684325', 'MetaCyc: PWY-7407', 'MetaCyc: PWY-6659', 'MetaCyc: PWY-5818', 'MetaCyc: PWY-5110', 'MetaCyc: PWY-7701', 'MetaCyc: PWY-7693', 'MetaCyc: PWY-6906', 'MetaCyc: PWY-7397', 'MetaCyc: PWY-7605', 'Reactome: R-HSA-197264', '…	{'IPR003356', 'IPR002052', 'IPR029063', 'IPR022749', 'IPR038333'}	AKK51290.1 Type I restriction-modification system methyltransferase subunit [Escherichia coli PCN033]		1936
562.22618.con.0008_92|562.22618	COG0124	J	Cluster 6030	2930.0	True	False				False	protein:proph:175647 Length: 426 # NCBI annotation: histidyl-tRNA synthetase # Family: family:all:5979 # MgeID: mge:2489 # MgeName: prophinder:45880 # Cross-refs: genbank:acc:YP_599515;genbank:gi:162139093;genbank:GeneID:4062859	True		False	{'GO:0005524', 'GO:0005737', 'GO:0004821', 'GO:0006427'}	{'GO:0005737'}	{'GO:0005524', 'GO:0004821'}	{'GO:0006427'}	{'Reactome: R-HSA-2408557', 'MetaCyc: PWY-5188', 'KEGG: 01120', 'MetaCyc: PWY-8116', 'KEGG: 00250', 'MetaCyc: PWY-7718', 'MetaCyc: PWY-8179', 'MetaCyc: PWY-8117', 'Reactome: R-HSA-2151201', 'Reactome: R-SCE-4570464', 'MetaCyc: PWY-6749', 'KEGG: 00240', 'MetaCyc: PWY-7735', 'Reactome: R-DDI-381042', 'MetaCyc: PWY-7127', 'Reactome: R-HSA-9633012', 'KEGG: 04151', 'Reactome: R-HSA-379716', 'KEGG: 051…	{'IPR041715', 'IPR036621', 'IPR015807', 'IPR004516', 'IPR006195', 'IPR004154', 'IPR033656'}	WP_000037894.1 MULTISPECIES: histidine--tRNA ligase [Escherichia]		1937
562.22618.con.0027_3|562.22618			Cluster 16331	21.0	False	False				False		False		False					{'Reactome: R-HSA-8856828', 'MetaCyc: PWY-6027', 'Reactome: R-CEL-3214842', 'Reactome: R-RNO-5696400', 'Reactome: R-HSA-5368598', 'Reactome: R-HSA-1660514', 'Reactome: R-HSA-5693565', 'Reactome: R-DME-5610780', 'MetaCyc: PWY-7693', 'Reactome: R-DDI-174178', 'MetaCyc: PWY-6720', 'MetaCyc: PWY-5994', 'MetaCyc: PWY-2723', 'MetaCyc: PWY-8035', 'Reactome: R-XTR-110312', 'Reactome: R-DME-4086400', 'Met…	{'IPR036388'}	WP_000594464.1 MULTISPECIES: hypothetical protein [Escherichia]	True	1938
562.22618.con.0027_6|562.22618			Cluster 28299	24.0	False	False				False		False		False							WP_000737407.1 MULTISPECIES: hypothetical protein [Escherichia]	True	1939
562.22620.con.0011_150|562.22620	COG0317	KT	Cluster 1607	2931.0	True	False				False		False		False	{'GO:0015969'}			{'GO:0015969'}	{'MetaCyc: PWY-5301', 'MetaCyc: PWY-5104', 'Reactome: R-RNO-5689880', 'MetaCyc: PWY-1641', 'MetaCyc: PWY-5418', 'MetaCyc: PWY-7407', 'Reactome: R-DME-4086398', 'Reactome: R-MMU-72163', 'Reactome: R-DRE-110381', 'MetaCyc: PWY-7009', 'MetaCyc: PWY-6160', 'MetaCyc: PWY-6197', 'MetaCyc: PWY-7303', 'MetaCyc: PWY-6389', 'Reactome: R-DDI-71403', 'MetaCyc: PWY-6720', 'Reactome: R-HSA-909733', 'Reactome: …	{'IPR012675', 'IPR002912', 'IPR033655', 'IPR012676', 'IPR003607', 'IPR004095', 'IPR007685', 'IPR004811', 'IPR043519'}	CDW60211.1 TRAM and TGS and ACT 4 and tRNA U5-meth tr and HD 4 and RelA SpoT domain containing protein [Trichuris trichiura]		1940
562.22620.con.0051_7|562.22620	COG3436	L	Cluster 30242	13.0	False	False				False	protein:proph:177621 Length: 512 # NCBI annotation: putative IS encoded protein encoded within prophage CP-933O # Family: family:all:39 # MgeID: mge:2542 # MgeName: prophinder:42702 # Cross-refs: genbank:acc:NP_287584;genbank:gi:15801567;genbank:GeneID:960596	True		False						{'IPR004291'}	EPP09708.1 IS66 family element, transposase domain protein [Klebsiella pneumoniae 280_1220]		1941
562.22628.con.0001_284|562.22628	COG2963	L	Cluster 29137	470.0	False	False				False	protein:plasmid:15993 Length: 94 # NCBI annotation: hypothetical protein # Family: family:all:18 # MgeID: mge:370 # MgeName: p1658/97 # Cross-refs: genbank:acc:NP_862976;genbank:gi:32470034;genbank:GeneID:1446535	True		False	{'GO:0004803', 'GO:0006313', 'GO:0003677'}		{'GO:0004803', 'GO:0003677'}	{'GO:0006313'}	{'Reactome: R-CEL-3214842', 'MetaCyc: PWY-6027', 'Reactome: R-HSA-156711', 'Reactome: R-HSA-5693565', 'MetaCyc: PWY-7407', 'Reactome: R-MMU-72163', 'Reactome: R-MMU-350054', 'Reactome: R-XTR-174417', 'MetaCyc: PWY-7693', 'Reactome: R-MMU-174417', 'Reactome: R-HSA-1839117', 'Reactome: R-HSA-6785807', 'MetaCyc: PWY-7694', 'MetaCyc: PWY-5994', 'MetaCyc: PWY-2723', 'MetaCyc: PWY-8035', 'Reactome: R-R…	{'IPR009057', 'IPR002514'}	WP_000537153.1 transposase [Escherichia coli]		1942
562.22628.con.0001_285|562.22628	COG2963	L	Cluster 14268	477.0	False	False				False	protein:plasmid:15994 Length: 267 # NCBI annotation: putative transposase # Family: family:all:3 # MgeID: mge:370 # MgeName: p1658/97 # Cross-refs: genbank:acc:NP_862977;genbank:gi:32470035;genbank:GeneID:1446536	True		False	{'GO:0032196', 'GO:0015074', 'GO:0003676'}		{'GO:0003676'}	{'GO:0032196', 'GO:0015074'}	{'Reactome: R-SCE-6791226', 'Reactome: R-GGA-6804115', 'Reactome: R-MMU-6804115', 'Reactome: R-SPO-429947', 'Reactome: R-HSA-5693616', 'MetaCyc: PWY-7961', 'Reactome: R-DME-110312', 'Reactome: R-MMU-69183', 'MetaCyc: PWY-7968', 'Reactome: R-HSA-3108214', 'Reactome: R-MMU-5656121', 'Reactome: R-SPO-674695', 'Reactome: R-MMU-69473', 'Reactome: R-RNO-5696400', 'Reactome: R-DME-203927', 'Reactome: R-…	{'IPR012337', 'IPR036397', 'IPR038965', 'IPR001584', 'IPR025948'}	KXQ65985.1 transposase [Escherichia coli]		1943
562.22628.con.0036_5|562.22628			Cluster 22772	10.0	False	False				False	protein:proph:169462 Length: 162 # NCBI annotation: hypothetical protein # Family: family:all:965 # MgeID: mge:2327 # MgeName: prophinder:42514 # Cross-refs: genbank:acc:YP_001453413;genbank:gi:157146094;genbank:GeneID:5580772	True		False						{'IPR014974'}	WP_085451822.1 DUF1833 domain-containing protein [Escherichia coli]	True	1944
562.22628.con.0060_10|562.22628			Cluster 26330	565.0	False	False				False	protein:plasmid:147460 Length: 131 # NCBI annotation: Mercuric transport protein MerT # Family: family:all:486 # MgeID: mge:1796 # MgeName: 1 # Cross-refs: genbank:gi:117676279;interpro:IPR003457;genbank:GeneID:4476037	True		False	{'GO:0015694', 'GO:0015097', 'GO:0016020'}	{'GO:0016020'}	{'GO:0015097'}	{'GO:0015694'}		{'IPR003457'}	WP_001294653.1 MULTISPECIES: mercuric ion transporter MerT [Gammaproteobacteria]		1945
562.22628.con.0070_20|562.22628			Cluster 27962	20.0	False	False				False	protein:proph:164906 Length: 69 # NCBI annotation: hypothetical protein # Family: family:all:23898 # MgeID: mge:2193 # MgeName: prophinder:43110 # Cross-refs: genbank:acc:YP_001335043;genbank:gi:152969934;genbank:GeneID:5341950	True		False							WP_121425090.1 hypothetical protein [Enterobacter asburiae]	True	1946
562.22628.con.0139_2|562.22628	COG3038	C	Cluster 20206	2922.0	True	False				False		False		False	{'GO:0016021', 'GO:0009055', 'GO:0022904', 'GO:0016020'}	{'GO:0016021', 'GO:0016020'}	{'GO:0009055'}	{'GO:0022904'}	{'MetaCyc: PWY-7279', 'MetaCyc: PWY-3781', 'Reactome: R-SPO-611105', 'MetaCyc: PWY-6692', 'Reactome: R-CFA-611105', 'KEGG: 00190', 'Reactome: R-DME-611105', 'Reactome: R-DRE-611105', 'KEGG: 01100', 'Reactome: R-DDI-611105', 'Reactome: R-SCE-611105', 'Reactome: R-RNO-611105', 'Reactome: R-HSA-611105', 'Reactome: R-GGA-611105', 'Reactome: R-MMU-611105'}	{'IPR016174', 'IPR011577'}	ABV20351.1 nickel-dependent hydrogenase, b-type cytochrome subunit [Escherichia coli O139:H28 str. E24377A]		1947
562.22630.con.0136_1|562.22630			Cluster 14584	312.0	False	False				False	protein:plasmid:158888 Length: 228 # NCBI annotation: hypothetical protein # Family: family:all:20967 # MgeID: mge:738 # MgeName: pU302L # Cross-refs: genbank:gi:58383294;genbank:GeneID:3259893	True		False							WP_106104999.1 hypothetical protein [Escherichia sp. R14]	True	1948
562.22633.con.0008_125|562.22633			Cluster 17841	9.0	False	False				False		False		False						{'IPR025285'}	WP_023568319.1 DUF4145 domain-containing protein [Escherichia coli]	True	1949
562.22633.con.0027_8|562.22633			Cluster 35815	13.0	False	False				False		False		False							ERB19451.1 glucitol/sorbitol-specific phosphotransferase enzyme IIB component [Escherichia coli UMEA 3151-1]		1950
562.22633.con.0048_5|562.22633	COG1961	L	Cluster 18235	43.0	False	False				False	protein:plasmid:153737 Length: 207 # NCBI annotation: resolvase # Family: family:all:7 # MgeID: mge:724 # MgeName: pTB11 # Cross-refs: genbank:gi:53793942;genbank:GeneID:3101980	True		False	{'GO:0003677', 'GO:0000150', 'GO:0006310'}		{'GO:0003677', 'GO:0000150'}	{'GO:0006310'}	{'Reactome: R-CEL-3214842', 'MetaCyc: PWY-6027', 'Reactome: R-HSA-156711', 'Reactome: R-HSA-5693565', 'MetaCyc: PWY-7407', 'Reactome: R-MMU-72163', 'Reactome: R-MMU-350054', 'Reactome: R-XTR-174417', 'MetaCyc: PWY-7693', 'Reactome: R-MMU-174417', 'Reactome: R-HSA-1839117', 'Reactome: R-HSA-6785807', 'MetaCyc: PWY-7694', 'MetaCyc: PWY-5994', 'MetaCyc: PWY-2723', 'MetaCyc: PWY-8035', 'Reactome: R-R…	{'IPR009057', 'IPR036162', 'IPR006119', 'IPR006118'}	WP_003830791.1 recombinase family protein [Salmonella enterica]		1951
562.22635.con.0020_86|562.22635	COG3666	L	Cluster 5241	71.0	False	False				False	protein:plasmid:158833 Length: 456 # NCBI annotation: putative transposase # Family: family:all:270 # MgeID: mge:738 # MgeName: pU302L # Cross-refs: genbank:gi:58383306;genbank:GeneID:3259832	True		False						{'IPR008490', 'IPR025668'}	WP_000971921.1 MULTISPECIES: IS1182-like element ISCfr1 family transposase [Bacteria]		1952
562.22636.con.0014_9|562.22636	COG3617	K	Cluster 3866	58.0	False	False				False	protein:vir:105046 Length: 260 # NCBI annotation: Gp27 # Family: family:all:12 # ACLAME annotation(s): phi:0000048 - negative transcriptional regulation of phage gene expression # MgeID: mge:1465 # MgeName: phiKO2 # Cross-refs: genbank:acc:YP_006607;genbank:gi:46402113;genbank:GeneID:2777911	True		False						{'IPR003497'}	ERB24871.1 hypothetical protein G958_04070 [Escherichia coli UMEA 3271-1]	True	1953
562.22636.con.0039_29|562.22636			Cluster 38272	14.0	False	False				False		False		False							BAX19227.1 hypothetical protein MRY15117_p11160 (plasmid) [Escherichia coli]	True	1954
562.22640.con.0058_4|562.22640	COG2148	M	Cluster 4738	36.0	False	False				False	protein:plasmid:146353 Length: 479 # NCBI annotation: Undecaprenyl-phosphate galactosephosphotransferase # Family: family:all:768 # MgeID: mge:731 # MgeName: 1 # Cross-refs: genbank:gi:94972138;genbank:GeneID:4073902	True		False					{'MetaCyc: PWY-6027', 'MetaCyc: PWY-6664', 'MetaCyc: PWY-7862', 'MetaCyc: PWY-3841', 'MetaCyc: PWY-6659', 'MetaCyc: PWY-7693', 'Reactome: R-HSA-77111', 'MetaCyc: PWY-7605', 'Reactome: R-DDI-70171', 'MetaCyc: PWY-6654', 'MetaCyc: PWY-6160', 'MetaCyc: PWY-7341', 'MetaCyc: PWY-5994', 'MetaCyc: PWY-7057', 'MetaCyc: PWY-8035', 'KEGG: 00472', 'Reactome: R-RNO-77305', 'MetaCyc: PWY-8034', 'MetaCyc: PWY-…	{'IPR036291', 'IPR003362', 'IPR017473', 'IPR017475'}	BAT23578.1 glycosyl transferase [Klebsiella sp. 6258]		1955
562.22645.con.0005_212|562.22645	COG0583	K	Cluster 11442	2930.0	True	False				False	protein:plasmid:118388 Length: 303 # NCBI annotation: transcriptional regulator, LysR family # Family: family:all:9 # MgeID: mge:1042 # MgeName: 1 # Cross-refs: genbank:gi:110347070;interpro:IPR000847;interpro:IPR005119;genbank:GeneID:4178606	True		False	{'GO:0006355', 'GO:0003700'}		{'GO:0003700'}	{'GO:0006355'}	{'Reactome: R-HSA-8856828', 'MetaCyc: PWY-6027', 'Reactome: R-CEL-3214842', 'Reactome: R-RNO-5696400', 'Reactome: R-HSA-5368598', 'Reactome: R-HSA-1660514', 'Reactome: R-HSA-5693565', 'Reactome: R-DME-5610780', 'MetaCyc: PWY-7693', 'Reactome: R-MMU-2468052', 'Reactome: R-DDI-174178', 'MetaCyc: PWY-6720', 'MetaCyc: PWY-5994', 'MetaCyc: PWY-2723', 'MetaCyc: PWY-8035', 'Reactome: R-XTR-110312', 'Rea…	{'IPR005119', 'IPR036390', 'IPR036388', 'IPR000847'}	WP_000622271.1 transcriptional regulator LrhA [Escherichia coli]		1956
562.22647.con.0014_58|562.22647	COG0583	K	Cluster 10995	2924.0	True	False				False	protein:plasmid:126293 Length: 301 # NCBI annotation: Transcriptional Regulator, LysR family # Family: family:all:9 # MgeID: mge:759 # MgeName: unnamed plasmid # Cross-refs: genbank:gi:83582747;interpro:IPR000847;interpro:IPR005119;genbank:GeneID:3833348	True		False	{'GO:0006355', 'GO:0003700'}		{'GO:0003700'}	{'GO:0006355'}	{'Reactome: R-HSA-8856828', 'MetaCyc: PWY-6027', 'Reactome: R-CEL-3214842', 'Reactome: R-RNO-5696400', 'Reactome: R-HSA-5368598', 'Reactome: R-HSA-1660514', 'Reactome: R-HSA-5693565', 'Reactome: R-DME-5610780', 'MetaCyc: PWY-7693', 'Reactome: R-MMU-2468052', 'Reactome: R-DDI-174178', 'MetaCyc: PWY-6720', 'MetaCyc: PWY-5994', 'MetaCyc: PWY-2723', 'MetaCyc: PWY-8035', 'Reactome: R-XTR-110312', 'Rea…	{'IPR036390', 'IPR005119', 'IPR037402', 'IPR000847', 'IPR036388'}	WP_101408941.1 HTH-type transcriptional regulator YidZ [Escherichia coli]		1957
562.22647.con.0025_31|562.22647	COG1846	K	Cluster 24515	2927.0	True	False				False		False		False	{'GO:0006355', 'GO:0003700'}		{'GO:0003700'}	{'GO:0006355'}	{'Reactome: R-HSA-8856828', 'MetaCyc: PWY-6027', 'Reactome: R-CEL-3214842', 'Reactome: R-RNO-5696400', 'Reactome: R-HSA-5368598', 'Reactome: R-HSA-1660514', 'Reactome: R-HSA-5693565', 'Reactome: R-DME-5610780', 'MetaCyc: PWY-7693', 'Reactome: R-MMU-2468052', 'Reactome: R-DDI-174178', 'MetaCyc: PWY-6720', 'MetaCyc: PWY-5994', 'MetaCyc: PWY-2723', 'MetaCyc: PWY-8035', 'Reactome: R-XTR-110312', 'Rea…	{'IPR036390', 'IPR023071', 'IPR036388', 'IPR000835', 'IPR023187'}	AAN80494.1 Transcriptional regulator slyA [Escherichia coli CFT073]		1958
562.22648.con.0008_6|562.22648	COG0129	E	Cluster 2517	2927.0	True	False				False	protein:plasmid:135590 Length: 608 # NCBI annotation: hypothetical protein # Family: family:all:829 # MgeID: mge:1838 # MgeName: pSbal01 # Cross-refs: genbank:gi:126090162;genbank:GeneID:4841257	True		False	{'GO:0009255', 'GO:0003824', 'GO:0004456'}		{'GO:0003824', 'GO:0004456'}	{'GO:0009255'}	{'MetaCyc: PWY-5104', 'MetaCyc: PWY-6945', 'KEGG: 01120', 'MetaCyc: PWY-5061', 'MetaCyc: PWY-8134', 'MetaCyc: PWY-8020', 'MetaCyc: PWY-2467', 'MetaCyc: PWY-5780', 'MetaCyc: PWY-7130', 'MetaCyc: PWY-6749', 'MetaCyc: PWY-6672', 'MetaCyc: PWY-7178', 'MetaCyc: PWY-6948', 'MetaCyc: PWY-6458', 'KEGG: 00290', 'MetaCyc: PWY-7510', 'MetaCyc: PWY-735', 'MetaCyc: PWY-7354', 'KEGG: 00053', 'MetaCyc: PWY-6763…	{'IPR004786', 'IPR000581', 'IPR037237', 'IPR020558', 'IPR042096'}	WP_033869932.1 phosphogluconate dehydratase [Escherichia coli]		1959
562.22651.con.0077_4|562.22651			Cluster 38852	5.0	False	False				False		False		False							SQN64536.1 Uncharacterised protein [Escherichia coli]	True	1960
562.22651.con.0077_5|562.22651			Cluster 21080	5.0	False	False				False	protein:proph:163887 Length: 186 # NCBI annotation: putative lipoprotein # Family: family:all:23820 # MgeID: mge:2158 # MgeName: prophinder:44205 # Cross-refs: genbank:acc:YP_001463308;genbank:gi:157158117;genbank:GeneID:5588513	True		False							WP_039021305.1 MULTISPECIES: hypothetical protein [Enterobacteriaceae]	True	1961
562.22651.con.0077_6|562.22651			Cluster 24181	5.0	False	False				False		False		False							WP_039021304.1 MULTISPECIES: hypothetical protein [Enterobacterales]	True	1962
562.22651.con.0077_7|562.22651			Cluster 20984	5.0	False	False				False		False		False							WP_046788550.1 hypothetical protein [Escherichia coli]	True	1963
562.22651.con.0077_8|562.22651			Cluster 25826	5.0	False	False				False		False		False							WP_001567331.1 MULTISPECIES: hypothetical protein [Enterobacteriaceae]	True	1964
562.22651.con.0077_9|562.22651			Cluster 35818	5.0	False	False				False		False		False							WP_001567330.1 MULTISPECIES: hypothetical protein [Enterobacteriaceae]	True	1965
562.22651.con.0080_10|562.22651	COG1192	D	Cluster 9291	10.0	False	False				False	protein:plasmid:18058 Length: 259 # NCBI annotation: putative chromosome partitioning protein # Family: family:all:6 # MgeID: mge:466 # MgeName: DSM 2661 # Cross-refs: genbank:acc:NP_044150;genbank:gi:10954513;genbank:GeneID:1450808	True		False					{'Reactome: R-HSA-8856828', 'Reactome: R-DME-2179392', 'MetaCyc: PWY-6027', 'Reactome: R-GGA-68689', 'Reactome: R-RNO-5696400', 'Reactome: R-BTA-73817', 'Reactome: R-MMU-381042', 'Reactome: R-GGA-2871796', 'Reactome: R-HSA-5693565', 'Reactome: R-DME-5610780', 'Reactome: R-DDI-5358565', 'Reactome: R-HSA-9684325', 'MetaCyc: PWY-3841', 'Reactome: R-HSA-1660514', 'MetaCyc: PWY-6659', 'Reactome: R-HSA…	{'IPR027417', 'IPR025669'}	WP_012291478.1 MULTISPECIES: hypothetical protein [Bacteria]	True	1966
562.22653.con.0020_66|562.22653			Cluster 34892	860.0	False	False				False	protein:vir:3487 Length: 68 # NCBI annotation: hypothetical protein # Family: family:all:4778 # MgeID: mge:70 # MgeName: lambda # Cross-refs: genbank:acc:NP_597782;genbank:gi:19263397;genbank:GeneID:2703534	True		False							WP_000548593.1 MULTISPECIES: hypothetical protein [Enterobacteriaceae]	True	1967
562.22653.con.0028_5|562.22653	COG2814	G	Cluster 3922	2928.0	True	True	emrB	3000074.0	{Chlor_Efflux_Pump, emrB, MFS_efflux, norA, tet_MFS_efflux}	True	protein:plasmid:145452 Length: 520 # NCBI annotation: Drug resistance transporter EmrB/QacA subfamily # Family: family:all:10 # MgeID: mge:1006 # MgeName: megaplasmid # Cross-refs: genbank:gi:72384020;interpro:IPR004638;interpro:IPR007114;interpro:IPR011701;genbank:GeneID:3607833	True		False	{'GO:0016021', 'GO:0055085', 'GO:0022857'}	{'GO:0016021'}	{'GO:0022857'}	{'GO:0055085'}	{'Reactome: R-RNO-210991', 'Reactome: R-MMU-159418', 'Reactome: R-HSA-8856828', 'Reactome: R-XTR-352230', 'Reactome: R-MMU-5653890', 'Reactome: R-RNO-196757', 'MetaCyc: PWY-6369', 'Reactome: R-HSA-352230', 'Reactome: R-MMU-196819', 'Reactome: R-HSA-442660', 'Reactome: R-HSA-5662702', 'Reactome: R-DME-422356', 'Reactome: R-DME-196836', 'Reactome: R-CEL-428643', 'Reactome: R-HSA-5619070', 'Reactome…	{'IPR004638', 'IPR036259', 'IPR011701', 'IPR020846'}	WP_001400788.1 multidrug efflux MFS transporter permease subunit EmrB [Escherichia coli]		1968
562.22653.con.0054_3|562.22653	COG1121	P	Cluster 15926	14.0	False	False			{ABC_efflux, macB, msbA}	True	protein:plasmid:134481 Length: 249 # NCBI annotation: ABC transporter related # Family: family:all:1 # MgeID: mge:1094 # MgeName: TM1040 mega plasmid # Cross-refs: genbank:gi:99078585;interpro:IPR001687;interpro:IPR003439;interpro:IPR003593;genbank:GeneID:4075041	True		False	{'GO:0005524', 'GO:0016887'}		{'GO:0005524', 'GO:0016887'}		{'Reactome: R-HSA-8856828', 'Reactome: R-DME-2179392', 'MetaCyc: PWY-6027', 'Reactome: R-GGA-68689', 'Reactome: R-RNO-5696400', 'Reactome: R-BTA-73817', 'Reactome: R-MMU-381042', 'Reactome: R-GGA-2871796', 'Reactome: R-HSA-5693565', 'Reactome: R-DME-5610780', 'Reactome: R-DDI-5358565', 'Reactome: R-HSA-9684325', 'MetaCyc: PWY-3841', 'Reactome: R-HSA-1660514', 'MetaCyc: PWY-6659', 'Reactome: R-HSA…	{'IPR003593', 'IPR027417', 'IPR017871', 'IPR003439'}	ABV12101.1 hypothetical protein CKO_00951 [Citrobacter koseri ATCC BAA-895]	True	1969
562.22653.con.0054_4|562.22653	COG1108	P	Cluster 13308	14.0	False	False				False	protein:plasmid:123288 Length: 278 # NCBI annotation: SitC # Family: family:all:1789 # MgeID: mge:845 # MgeName: pAPEC-O2-ColV # Cross-refs: genbank:gi:84060848;genbank:GeneID:3853490	True		False	{'GO:0055085', 'GO:0043190', 'GO:0042626', 'GO:0005887'}	{'GO:0043190', 'GO:0005887'}	{'GO:0042626'}	{'GO:0055085'}		{'IPR037294', 'IPR001626'}	WP_001104308.1 MULTISPECIES: metal ABC transporter permease [Enterobacteriaceae]		1970
562.22653.con.0054_5|562.22653	COG0803	P	Cluster 11379	14.0	False	False				False	protein:plasmid:151354 Length: 311 # NCBI annotation: adhesion lipoprotein # Family: family:all:1615 # MgeID: mge:1091 # MgeName: pE33L54 # Cross-refs: genbank:gi:67078361;genbank:GeneID:3400039	True		False	{'GO:0007155', 'GO:0030001', 'GO:0046872'}		{'GO:0046872'}	{'GO:0007155', 'GO:0030001'}		{'IPR006127', 'IPR006128', 'IPR006129'}	WP_014907288.1 Zinc ABC transporter, periplasmic-binding protein ZnuA [Klebsiella pneumoniae]		1971
562.22653.con.0054_6|562.22653			Cluster 6555	14.0	False	False				False	protein:plasmid:144368 Length: 412 # NCBI annotation: hypothetical protein # Family: family:all:6170 # MgeID: mge:1969 # MgeName: pSMED01 # Cross-refs: genbank:gi:150376241;genbank:GeneID:5318912	True		False	{'GO:0005515'}		{'GO:0005515'}		{'Reactome: R-HSA-8856828', 'Reactome: R-DDI-389357', 'Reactome: R-HSA-2995383', 'Reactome: R-RNO-5696400', 'Reactome: R-HSA-1660514', 'MetaCyc: PWY-7693', 'Reactome: R-DME-9646399', 'Reactome: R-DDI-174178', 'MetaCyc: PWY-6720', 'MetaCyc: PWY-7057', 'Reactome: R-DME-6811434', 'MetaCyc: PWY-8034', 'MetaCyc: PWY-7288', 'Reactome: R-MMU-399956', 'Reactome: R-HSA-983168', 'Reactome: R-HSA-8876198', …	{'IPR015943', 'IPR011045'}	ABV12098.1 hypothetical protein CKO_00948 [Citrobacter koseri ATCC BAA-895]	True	1972
562.22660.con.0030_4|562.22660			Cluster 1401	67.0	False	False				False	protein:vir:101375 Length: 987 # NCBI annotation: S # Family: family:all:13 # MgeID: mge:1512 # MgeName: P1 # Cross-refs: genbank:acc:YP_006502;genbank:gi:46401656;genbank:GeneID:2777437	True		False						{'IPR005068'}	STL58696.1 putative phage tail fiber protein [Escherichia coli]		1973
562.22661.con.0016_5|562.22661	COG0419	L	Cluster 2177	95.0	False	False				False	protein:plasmid:110471 Length: 671 # NCBI annotation: SMC protein-like # Family: family:all:7423 # MgeID: mge:1073 # MgeName: 3 # Cross-refs: genbank:gi:110347357;interpro:IPR001687;interpro:IPR003395;interpro:IPR003439;interpro:IPR004838;genbank:GeneID:4178698	True		False					{'Reactome: R-HSA-8856828', 'Reactome: R-DME-2179392', 'MetaCyc: PWY-6027', 'Reactome: R-GGA-68689', 'Reactome: R-RNO-5696400', 'Reactome: R-BTA-73817', 'Reactome: R-MMU-381042', 'Reactome: R-GGA-2871796', 'Reactome: R-HSA-5693565', 'Reactome: R-DME-5610780', 'Reactome: R-DDI-5358565', 'Reactome: R-HSA-9684325', 'MetaCyc: PWY-3841', 'Reactome: R-HSA-1660514', 'MetaCyc: PWY-6659', 'Reactome: R-HSA…	{'IPR027417', 'IPR017599', 'IPR003395'}	WP_016233767.1 DNA sulfur modification protein DndD [Escherichia coli]		1974
562.22664.con.0024_28|562.22664	COG0741	M	Cluster 2375	2931.0	True	False				False	protein:plasmid:135560 Length: 641 # NCBI annotation: hypothetical protein # Family: family:all:1861 # MgeID: mge:1838 # MgeName: pSbal01 # Cross-refs: genbank:gi:126090196;genbank:GeneID:4841227	True		False	{'GO:0016020', 'GO:0000270', 'GO:0008933', 'GO:0004553', 'GO:0042597'}	{'GO:0016020', 'GO:0042597'}	{'GO:0008933', 'GO:0004553'}	{'GO:0000270'}	{'MetaCyc: PWY-6737', 'Reactome: R-SSC-5653890', 'MetaCyc: PWY-7056', 'Reactome: R-RNO-6803157', 'Reactome: R-MMU-6803157', 'MetaCyc: PWY-7450', 'MetaCyc: PWY-6385', 'MetaCyc: PWY-6855', 'MetaCyc: PWY-7091', 'Reactome: R-MMU-5653890', 'Reactome: R-BTA-6798695', 'MetaCyc: PWY-7822', 'MetaCyc: PWY-7134', 'MetaCyc: PWY-7445', 'MetaCyc: PWY-5800', 'MetaCyc: PWY-6527', 'MetaCyc: PWY-6749', 'MetaCyc: P…	{'IPR037061', 'IPR000189', 'IPR023346', 'IPR008258', 'IPR012289', 'IPR008939'}	WP_000409429.1 MULTISPECIES: murein transglycosylase [Enterobacteriaceae]		1975
562.22666.con.0040_17|562.22666	COG5301	S	Cluster 3474	91.0	False	False				False	protein:proph:175181 Length: 552 # NCBI annotation: putative phage tail fiber protein H # Family: family:all:13 # MgeID: mge:2476 # MgeName: prophinder:45137 # Cross-refs: genbank:acc:YP_219067;genbank:gi:62182650;genbank:GeneID:3336624	True		False						{'IPR005068', 'IPR022225', 'IPR037053', 'IPR011083'}	WP_000135568.1 short-chain fatty acid transporter [Escherichia coli]		1976
562.22666.con.0068_1|562.22666	COG1509	E	Cluster 9860	2929.0	True	False				False	protein:plasmid:131778 Length: 340 # NCBI annotation: hypothetical protein # Family: family:all:7504 # MgeID: mge:1936 # MgeName: pRSPA01 # Cross-refs: genbank:gi:146279243;genbank:GeneID:5085961	True		False	{'GO:0003824', 'GO:0051536'}		{'GO:0003824', 'GO:0051536'}		{'Reactome: R-DDI-70350', 'MetaCyc: PWY-5301', 'Reactome: R-RNO-71336', 'MetaCyc: PWY-6027', 'MetaCyc: PWY-7091', 'Reactome: R-DDI-6798695', 'Reactome: R-HSA-6791055', 'MetaCyc: PWY-7862', 'Reactome: R-BTA-73817', 'MetaCyc: PWY-7161', 'Reactome: R-HSA-73817', 'MetaCyc: PWY-7407', 'MetaCyc: PWY-5800', 'Reactome: R-MMU-4085001', 'MetaCyc: PWY-5818', 'MetaCyc: PWY-7693', 'MetaCyc: PWY-6906', 'Reacto…	{'IPR022462', 'IPR013785', 'IPR007197', 'IPR003739'}	WP_000940543.1 EF-P beta-lysylation protein EpmB [Escherichia coli]		1977
562.22668.con.0005_99|562.22668	COG1622	C	Cluster 11102	2931.0	True	False				False	protein:plasmid:28304 Length: 386 # NCBI annotation: putative cytochrome o ubiquinol oxidase chain II protein # Family: family:all:927 # MgeID: mge:608 # MgeName: pSymB # Cross-refs: genbank:acc:NP_437855;genbank:gi:16265063;genbank:GeneID:1237647	True		False	{'GO:0016020', 'GO:0055114', 'GO:0022900', 'GO:0004129', 'GO:0005507', 'GO:0016682', 'GO:0016021', 'GO:0008827'}	{'GO:0016021', 'GO:0016020'}	{'GO:0004129', 'GO:0005507', 'GO:0016682', 'GO:0008827'}	{'GO:0022900', 'GO:0055114'}	{'MetaCyc: PWY-7279', 'MetaCyc: PWY-7718', 'MetaCyc: PWY-5476', 'Reactome: R-HSA-3247509', 'Reactome: R-HSA-9672397', 'Reactome: R-HSA-917937', 'Reactome: R-BTA-3928665', 'Reactome: R-CEL-2682334', 'MetaCyc: PWY-5469', 'Reactome: R-CEL-3928665', 'Reactome: R-RNO-2682334', 'Reactome: R-HSA-3928664', 'Reactome: R-HSA-9673202', 'Reactome: R-MMU-381426', 'Reactome: R-BTA-3928663', 'MetaCyc: PWY-5399'…	{'IPR036257', 'IPR011759', 'IPR008972', 'IPR002429', 'IPR034227', 'IPR006333', 'IPR010514'}	WP_001239432.1 cytochrome o ubiquinol oxidase subunit II [Escherichia coli]		1978
562.22670.con.0004_207|562.22670	COG3226	K	Cluster 17846	2926.0	True	False				False		False		False	{'GO:0003677'}		{'GO:0003677'}		{'Reactome: R-CEL-3214842', 'MetaCyc: PWY-6027', 'Reactome: R-HSA-156711', 'Reactome: R-HSA-5693565', 'MetaCyc: PWY-7407', 'Reactome: R-MMU-72163', 'Reactome: R-MMU-350054', 'Reactome: R-XTR-174417', 'MetaCyc: PWY-7693', 'Reactome: R-MMU-174417', 'Reactome: R-HSA-1839117', 'Reactome: R-HSA-6785807', 'MetaCyc: PWY-7694', 'MetaCyc: PWY-5994', 'MetaCyc: PWY-2723', 'MetaCyc: PWY-8035', 'Reactome: R-R…	{'IPR009057', 'IPR001647'}	ABE06335.1 putative DEOR-type transcriptional regulator [Escherichia coli UTI89]		1979
562.22670.con.0029_36|562.22670	COG3347	S	Cluster 5244	551.0	False	False				False	protein:plasmid:126098 Length: 313 # NCBI annotation: probable ribose ABC transporter, substrate-binding protein # Family: family:all:30 # MgeID: mge:760 # MgeName: p42f # Cross-refs: genbank:gi:86360771;cog:COG1879;pfam:PF00532.8;interpro:IPR001761;uniprot:Q987K4;genbank:GeneID:3896221	True	gb|NP_415611.1|antibiotic resistant fabG [Escherichia coli str. K-12 substr. MG1655]	True	{'GO:0016491', 'GO:0055114'}		{'GO:0016491'}	{'GO:0055114'}	{'MetaCyc: PWY-6027', 'MetaCyc: PWY-6664', 'MetaCyc: PWY-7862', 'MetaCyc: PWY-3841', 'MetaCyc: PWY-6659', 'MetaCyc: PWY-7693', 'Reactome: R-HSA-77111', 'MetaCyc: PWY-7605', 'Reactome: R-DDI-70171', 'MetaCyc: PWY-6654', 'MetaCyc: PWY-6160', 'MetaCyc: PWY-7341', 'Reactome: R-CEL-5694530', 'MetaCyc: PWY-5994', 'MetaCyc: PWY-7057', 'MetaCyc: PWY-8035', 'KEGG: 00472', 'Reactome: R-RNO-77305', 'MetaCyc…	{'IPR020904', 'IPR002347', 'IPR028082', 'IPR036291', 'IPR025997'}	OXZ60664.1 ribose transport system substrate-binding protein [Escherichia coli]		1980
562.22670.con.0034_17|562.22670			Cluster 28658	5.0	False	False				False		False		False							KLV37174.1 hypothetical protein SK31_04916 [Citrobacter sp. MGH99]	True	1983
562.22670.con.0034_3|562.22670			Cluster 22685	5.0	False	False				False	protein:proph:159348 Length: 147 # NCBI annotation: hypothetical protein # Family: family:all:954 # MgeID: mge:2026 # MgeName: prophinder:42940 # Cross-refs: genbank:acc:YP_454892;genbank:gi:85059190;genbank:GeneID:3866851	True		False	{'GO:0006355'}			{'GO:0006355'}	{'Reactome: R-HSA-72086', 'Reactome: R-HSA-167242', 'Reactome: R-SCE-113418', 'Reactome: R-SPO-72086', 'Reactome: R-DME-72086', 'Reactome: R-HSA-6796648', 'Reactome: R-SPO-113418', 'Reactome: R-DRE-6796648', 'Reactome: R-MMU-72086', 'Reactome: R-SPO-674695', 'Reactome: R-HSA-167152', 'Reactome: R-SPO-6796648', 'Reactome: R-CEL-112382', 'Reactome: R-SCE-75955', 'Reactome: R-CEL-113418', 'Reactome:…	{'IPR036735', 'IPR006645'}	WP_044715152.1 MULTISPECIES: transcription termination factor NusG [Enterobacterales]		1981
562.22670.con.0034_4|562.22670			Cluster 34325	5.0	False	False				False		False		False							WP_072048907.1 MULTISPECIES: hypothetical protein [Enterobacterales]	True	1982
562.22671.con.0025_17|562.22671	COG3793	P	Cluster 21881	48.0	False	False				False	protein:plasmid:154074 Length: 151 # NCBI annotation: tellurite resistance protein # Family: family:all:6152 # MgeID: mge:1030 # MgeName: R478 # Cross-refs: genbank:gi:38347902;interpro:IPR007791;uniprot:Q79C16;genbank:GeneID:2653956	True		False						{'IPR029024', 'IPR007791'}	EII35342.1 tellurite resistance protein TerB [Escherichia coli 4.0967]		1984
562.22671.con.0025_33|562.22671			Cluster 8546	36.0	False	False				False	protein:plasmid:153860 Length: 360 # NCBI annotation: hypothetical protein # Family: family:all:3774 # MgeID: mge:1030 # MgeName: R478 # Cross-refs: genbank:gi:38347886;uniprot:Q6MXY1;genbank:GeneID:2653742	True		False							SPE03013.1 conserved protein of unknown function (plasmid) [Escherichia coli]	True	1985
562.22671.con.0025_42|562.22671			Cluster 19475	21.0	False	False				False	protein:plasmid:153851 Length: 196 # NCBI annotation: putative inner membrane protein # Family: family:all:6252 # MgeID: mge:1030 # MgeName: R478 # Cross-refs: genbank:gi:38347876;uniprot:Q6MXZ1;genbank:GeneID:2653733	True		False							WP_000578892.1 MULTISPECIES: hypothetical protein [Gammaproteobacteria]	True	1986
562.22671.con.0025_52|562.22671	COG4548	P	Cluster 2147	20.0	False	False				False	protein:plasmid:153841 Length: 668 # NCBI annotation: hypothetical protein # Family: family:all:469 # MgeID: mge:1030 # MgeName: R478 # Cross-refs: genbank:gi:38347866;goa:Q6MY01;interpro:IPR002035;uniprot:Q6MY01;genbank:GeneID:2653723	True		False					{'Reactome: R-RNO-210991', 'Reactome: R-BTA-69017', 'Reactome: R-RNO-372708', 'Reactome: R-HSA-6796648', 'Reactome: R-DDI-6798695', 'Reactome: R-RNO-5696400', 'Reactome: R-DME-195253', 'Reactome: R-HSA-186797', 'Reactome: R-HSA-5210891', 'Reactome: R-HSA-5693565', 'Reactome: R-DME-5610780', 'Reactome: R-DDI-76042', 'MetaCyc: PWY-5800', 'Reactome: R-HSA-2022090', 'Reactome: R-MMU-2022090', 'Reacto…	{'IPR036465', 'IPR002035'}	WP_000762697.1 MULTISPECIES: VWA domain-containing protein [Enterobacteriaceae]		1987
562.22671.con.0025_62|562.22671			Cluster 7822	35.0	False	False				False	protein:plasmid:154121 Length: 353 # NCBI annotation: plasmid exported transfer protein # Family: family:all:250 # MgeID: mge:1030 # MgeName: R478 # Cross-refs: genbank:gi:38347856;interpro:IPR009649;uniprot:Q6MY11;genbank:GeneID:2654003	True		False						{'IPR009649'}	ABF67711.1 TrhU (plasmid) [Escherichia coli APEC O1]		1988
562.22671.con.0027_22|562.22671			Cluster 30399	17.0	False	False				False	protein:plasmid:153917 Length: 95 # NCBI annotation: putative inner membrane protein # Family: family:all:9590 # MgeID: mge:1030 # MgeName: R478 # Cross-refs: genbank:gi:38347991;uniprot:Q6MXM7;genbank:GeneID:2653799	True		False							WP_012006583.1 MULTISPECIES: hypothetical protein [Enterobacteriaceae]	True	1989
562.22671.con.0044_25|562.22671			Cluster 18920	19.0	False	False				False	protein:plasmid:154001 Length: 147 # NCBI annotation: hypothetical protein # Family: family:all:9595 # MgeID: mge:1030 # MgeName: R478 # Cross-refs: genbank:gi:38348107;uniprot:Q6MXB1;genbank:GeneID:2653883	True		False							WP_001572415.1 MULTISPECIES: hypothetical protein [Gammaproteobacteria]	True	1990
562.22671.con.0048_12|562.22671	COG1475	K	Cluster 9449	20.0	False	False				False	protein:plasmid:154013 Length: 350 # NCBI annotation: hypothetical protein # Family: family:all:608 # MgeID: mge:1030 # MgeName: R478 # Cross-refs: genbank:gi:38348121;goa:Q6MX97;uniprot:Q6MX97;genbank:GeneID:2653895	True		False							WP_001065779.1 MULTISPECIES: hypothetical protein [Gammaproteobacteria]	True	1992
562.22671.con.0048_14|562.22671			Cluster 33111	20.0	False	False				False		False		False							WP_001173628.1 MULTISPECIES: hypothetical protein [Gammaproteobacteria]	True	1993
562.22671.con.0048_4|562.22671			Cluster 23763	20.0	False	False				False	protein:plasmid:154006 Length: 147 # NCBI annotation: exported protein # Family: family:all:20185 # MgeID: mge:1030 # MgeName: R478 # Cross-refs: genbank:gi:38348113;uniprot:Q6MXA5;genbank:GeneID:2653888	True		False							WP_000502497.1 MULTISPECIES: hypothetical protein [Gammaproteobacteria]	True	1991
562.22671.con.0059_9|562.22671	COG1961	L	Cluster 29519	11.0	False	False				False	protein:plasmid:148528 Length: 207 # NCBI annotation: resolvase TnpR for transposon Tn5393 # Family: family:all:7 # MgeID: mge:1975 # MgeName: pYR1 # Cross-refs: genbank:gi:134044477;genbank:GeneID:4927108	True		False	{'GO:0003677', 'GO:0000150', 'GO:0006310'}		{'GO:0003677', 'GO:0000150'}	{'GO:0006310'}	{'MetaCyc: PWY-6689'}	{'IPR036162', 'IPR006119', 'IPR006118'}	WP_012360777.1 recombinase family protein, partial [Corynebacterium striatum]		1994
562.22675.con.0006_119|562.22675	COG2201	T	Cluster 9339	2922.0	True	False			{adeR, baeR, vanR}	True	protein:plasmid:22417 Length: 381 # NCBI annotation: chemotaxis-specific methylesterase # Family: family:all:5 # MgeID: mge:570 # MgeName: pGMI1000MP # Cross-refs: genbank:acc:NP_522962;genbank:gi:17549622;genbank:GeneID:1223715	True		False	{'GO:0005737', 'GO:0000160', 'GO:0006935', 'GO:0000156', 'GO:0008984'}	{'GO:0005737'}	{'GO:0000156', 'GO:0008984'}	{'GO:0006935', 'GO:0000160'}	{'Reactome: R-SPO-3371568', 'MetaCyc: PWY-5491', 'MetaCyc: PWY-46', 'KEGG: 00230', 'MetaCyc: PWY-6686', 'MetaCyc: PWY-7878', 'MetaCyc: PWY-8176', 'MetaCyc: PWY-6456', 'KEGG: 00330', 'MetaCyc: PWY-7881', 'MetaCyc: PWY-7863', 'MetaCyc: PWY-6575', 'MetaCyc: PWY-6689', 'MetaCyc: PWY-6368', 'MetaCyc: PWY-6366', 'MetaCyc: PWY-7366', 'MetaCyc: PWY-7119', 'MetaCyc: PWY-6352', 'Reactome: R-DDI-418555', 'R…	{'IPR035909', 'IPR000673', 'IPR011006', 'IPR001789', 'IPR008248'}	WP_000036385.1 MULTISPECIES: chemotaxis response regulator protein-glutamate methylesterase [Escherichia]		1995
562.22675.con.0008_112|562.22675	COG1309	K	Cluster 18309	2928.0	True	False				False		False		False	{'GO:0003677'}		{'GO:0003677'}		{'Reactome: R-CEL-3214842', 'MetaCyc: PWY-6027', 'Reactome: R-HSA-156711', 'Reactome: R-HSA-5693565', 'MetaCyc: PWY-7407', 'Reactome: R-MMU-72163', 'Reactome: R-MMU-350054', 'Reactome: R-XTR-174417', 'MetaCyc: PWY-7693', 'Reactome: R-MMU-174417', 'Reactome: R-HSA-1839117', 'Reactome: R-HSA-6785807', 'MetaCyc: PWY-7694', 'MetaCyc: PWY-5994', 'MetaCyc: PWY-2723', 'MetaCyc: PWY-8035', 'Reactome: R-R…	{'IPR036271', 'IPR001647', 'IPR009057', 'IPR011075'}	STK32267.1 TetR family transcriptional regulator [Escherichia coli]		1996
562.22676.con.0018_20|562.22676	COG2357	S	Cluster 8321	15.0	False	False				False	protein:proph:159417 Length: 371 # NCBI annotation: hypothetical protein # Family: family:all:23210 # MgeID: mge:2029 # MgeName: prophinder:42965 # Cross-refs: genbank:acc:YP_454615;genbank:gi:85058913;genbank:GeneID:3868383	True		False	{'GO:0015969'}			{'GO:0015969'}	{'Reactome: R-RNO-5693571', 'MetaCyc: PWY-8176', 'Reactome: R-RNO-5689880', 'KEGG: 00230', 'MetaCyc: PWY-7878', 'Reactome: R-SPO-429947', 'Reactome: R-HSA-5649702', 'Reactome: R-DRE-110362', 'MetaCyc: PWY-6575', 'Reactome: R-MMU-72163', 'MetaCyc: PWY-6368', 'Reactome: R-DRE-110381', 'Reactome: R-HSA-110373', 'MetaCyc: PWY-6720', 'MetaCyc: PWY-8052', 'Reactome: R-HSA-909733', 'Reactome: R-MMU-8983…	{'IPR043519', 'IPR007685'}	WP_000526244.1 MULTISPECIES: (p)ppGpp synthetase [Enterobacteriaceae]		1997
562.22677.con.0016_1|562.22677			Cluster 20209	10.0	False	False				False		False		False	{'GO:0006508', 'GO:0005524', 'GO:0004176', 'GO:0004222'}		{'GO:0005524', 'GO:0004176', 'GO:0004222'}	{'GO:0006508'}	{'MetaCyc: PWY-8119', 'Reactome: R-RNO-8949664', 'Reactome: R-MMU-8949664', 'Reactome: R-CEL-8949664', 'Reactome: R-HSA-8949664', 'Reactome: R-DME-8949664', 'Reactome: R-BTA-8949664'}	{'IPR037219'}	WP_046659635.1 MULTISPECIES: hypothetical protein [Enterobacteriaceae]	True	1998
562.22677.con.0016_29|562.22677			Cluster 28304	10.0	False	False				False		False		False							WP_064185104.1 MULTISPECIES: hypothetical protein [Enterobacteriaceae]	True	2001
562.22677.con.0016_2|562.22677			Cluster 37079	10.0	False	False				False		False		False							EMI35706.1 hypothetical protein MTE2_5181 [Klebsiella pneumoniae VA360]	True	1999
562.22677.con.0016_30|562.22677	COG3926	R	Cluster 21084	10.0	False	False				False	protein:proph:170043 Length: 180 # NCBI annotation: hypothetical protein # Family: family:all:520 # MgeID: mge:2337 # MgeName: prophinder:43976 # Cross-refs: genbank:acc:YP_050708;genbank:gi:50121541;genbank:GeneID:2883012	True		False					{'MetaCyc: PWY-6737', 'Reactome: R-SSC-5653890', 'MetaCyc: PWY-7056', 'Reactome: R-RNO-6803157', 'Reactome: R-MMU-6803157', 'MetaCyc: PWY-7450', 'MetaCyc: PWY-6385', 'MetaCyc: PWY-6855', 'MetaCyc: PWY-7091', 'Reactome: R-MMU-5653890', 'Reactome: R-BTA-6798695', 'MetaCyc: PWY-7822', 'MetaCyc: PWY-7134', 'MetaCyc: PWY-7445', 'MetaCyc: PWY-5800', 'MetaCyc: PWY-6527', 'MetaCyc: PWY-6749', 'MetaCyc: P…	{'IPR018537', 'IPR008565', 'IPR023346'}	WP_052921350.1 MULTISPECIES: hypothetical protein [Enterobacteriaceae]	True	2002
562.22677.con.0016_3|562.22677			Cluster 28439	13.0	False	False				False	protein:proph:175115 Length: 111 # NCBI annotation: hypothetical protein # Family: family:all:3266 # MgeID: mge:2474 # MgeName: prophinder:45435 # Cross-refs: genbank:acc:NP_805644;genbank:gi:29142302;genbank:GeneID:1068884	True		False							WP_029487556.1 MULTISPECIES: hypothetical protein [Enterobacteriaceae]	True	2000
562.22677.con.0034_56|562.22677			Cluster 17847	16.0	False	False				False	protein:proph:175260 Length: 251 # NCBI annotation: putative bacteriophage protein # Family: family:all:449 # MgeID: mge:2478 # MgeName: prophinder:45142 # Cross-refs: genbank:acc:YP_217574;genbank:gi:62181157;genbank:GeneID:3335087	True		False					{'MetaCyc: PWY-8119', 'MetaCyc: PWY-7543', 'MetaCyc: PWY-7612', 'MetaCyc: PWY-7056', 'MetaCyc: PWY-6737', 'MetaCyc: PWY-7702', 'MetaCyc: PWY-7091', 'MetaCyc: PWY-6855', 'MetaCyc: PWY-7571', 'MetaCyc: PWY-6379', 'MetaCyc: PWY-7650', 'MetaCyc: PWY-7134', 'MetaCyc: PWY-7445', 'MetaCyc: PWY-7569', 'MetaCyc: PWY-6527', 'MetaCyc: PWY-6749', 'MetaCyc: PWY-7577', 'MetaCyc: PWY-6289', 'MetaCyc: PWY-7735',…	{'IPR037026', 'IPR044033', 'IPR041599'}	WP_046659632.1 MULTISPECIES: hypothetical protein [Enterobacteriaceae]	True	2003
562.22679.con.0032_8|562.22679			Cluster 12100	18.0	False	False				False		False		False							KDG93477.1 hypothetical protein AE24_02825 [Escherichia coli UCI 65]	True	2004
562.22687.con.0070_6|562.22687	COG1487	R	Cluster 25027	691.0	False	False				False	protein:plasmid:24709 Length: 138 # NCBI annotation: hypothetical protein # Family: family:all:181 # MgeID: mge:595 # MgeName: R64 # Cross-refs: genbank:acc:NP_863394;genbank:gi:32470170;genbank:GeneID:1446652	True		False	{'GO:0004540'}		{'GO:0004540'}		{'Reactome: R-SCE-6791226', 'Reactome: R-DRE-69473', 'Reactome: R-HSA-5693616', 'Reactome: R-SCE-5358565', 'Reactome: R-DRE-110362', 'Reactome: R-MMU-69473', 'Reactome: R-HSA-975957', 'Reactome: R-DDI-5358565', 'Reactome: R-CEL-450385', 'Reactome: R-HSA-5358565', 'Reactome: R-DRE-5685938', 'Reactome: R-HSA-450513', 'Reactome: R-HSA-5685938', 'Reactome: R-HSA-5693579', 'Reactome: R-MMU-174437', 'R…	{'IPR029060', 'IPR002716', 'IPR022907'}	EHY02336.1 PIN domain protein [Escherichia coli DEC15A]		2005
562.22689.con.0061_8|562.22689	COG0640	K	Cluster 16829	407.0	False	False				False	protein:plasmid:19666 Length: 228 # NCBI annotation: hypothetical protein # Family: family:all:66 # MgeID: mge:518 # MgeName: R100 # Cross-refs: genbank:acc:NP_052929;genbank:gi:9507598;genbank:GeneID:1263400	True		False	{'GO:0006355', 'GO:0003700'}		{'GO:0003700'}	{'GO:0006355'}	{'Reactome: R-HSA-8856828', 'MetaCyc: PWY-6027', 'Reactome: R-CEL-3214842', 'Reactome: R-RNO-5696400', 'Reactome: R-HSA-5368598', 'Reactome: R-HSA-1660514', 'Reactome: R-HSA-5693565', 'Reactome: R-DME-5610780', 'MetaCyc: PWY-7693', 'Reactome: R-MMU-2468052', 'Reactome: R-DDI-174178', 'MetaCyc: PWY-6720', 'MetaCyc: PWY-5994', 'MetaCyc: PWY-2723', 'MetaCyc: PWY-8035', 'Reactome: R-XTR-110312', 'Rea…	{'IPR036390', 'IPR036388', 'IPR001845', 'IPR011991'}	WP_033878925.1 ArsR family transcriptional regulator [Escherichia coli]		2006
562.22695.con.0009_136|562.22695			Cluster 17103	109.0	False	False				False	protein:proph:181237 Length: 178 # NCBI annotation: hypothetical protein # Family: family:all:67 # MgeID: mge:2648 # MgeName: prophinder:43027 # Cross-refs: genbank:acc:YP_541686;genbank:gi:91211700;genbank:GeneID:3991557	True		False						{'IPR025153'}	WP_000034225.1 ead/Ea22-like family protein [Escherichia coli]		2007
562.22697.con.0026_71|562.22697	COG5562	S	Cluster 25947	7.0	False	False				False	protein:proph:181318 Length: 141 # NCBI annotation: hypothetical protein # Family: family:all:3145 # MgeID: mge:2649 # MgeName: prophinder:43540 # Cross-refs: genbank:acc:YP_311308;genbank:gi:74312889;genbank:GeneID:3668582	True		False						{'IPR009833', 'IPR036696'}	WP_024223431.1 DUF1398 domain-containing protein [Escherichia coli]	True	2008
562.22698.con.0009_137|562.22698	COG1678	K	Cluster 18007	2931.0	True	False				False	protein:plasmid:134603 Length: 206 # NCBI annotation: protein of unknown function DUF179 # Family: family:all:17040 # MgeID: mge:1094 # MgeName: TM1040 mega plasmid # Cross-refs: genbank:gi:99078047;interpro:IPR003774;genbank:GeneID:4075163	True		False						{'IPR003774'}	WP_000126441.1 MULTISPECIES: YqgE/AlgH family protein [Enterobacteriaceae]		2009
562.22699.con.0042_5|562.22699			Cluster 17039	24.0	False	False				False		False		False							WP_001513525.1 MULTISPECIES: hypothetical protein [Enterobacteriaceae]	True	2010
562.22699.con.0042_6|562.22699			Cluster 17040	24.0	False	False				False		False		False					{'MetaCyc: PWY-7025', 'MetaCyc: PWY-6148', 'MetaCyc: PWY-7018', 'MetaCyc: PWY-7450', 'MetaCyc: PWY-5800', 'MetaCyc: PWY-6720', 'MetaCyc: PWY-5381', 'MetaCyc: PWY-7981', 'MetaCyc: PWY-7817'}	{'IPR014914'}	WP_001513524.1 MULTISPECIES: RES domain-containing protein [Enterobacteriaceae]		2011
562.22699.con.0101_2|562.22699			Cluster 33792	2094.0	False	False				False	protein:plasmid:158881 Length: 79 # NCBI annotation: hypothetical protein # Family: family:all:596 # MgeID: mge:738 # MgeName: pU302L # Cross-refs: genbank:gi:58383258;genbank:GeneID:3259886	True		False						{'IPR038612', 'IPR009253'}	WP_077629168.1 MULTISPECIES: DUF905 domain-containing protein [Enterobacteriaceae]	True	2012
562.22700.con.0020_2|562.22700	COG1216	M	Cluster 13043	9.0	False	False				False		False		False					{'Reactome: R-CEL-913709', 'MetaCyc: PWY-6664', 'MetaCyc: PWY-5800', 'Reactome: R-MMU-4085001', 'MetaCyc: PWY-5818', 'MetaCyc: PWY-7623', 'MetaCyc: PWY-8113', 'MetaCyc: PWY-6051', 'Reactome: R-MMU-190372', 'MetaCyc: PWY-6720', 'Reactome: R-CEL-964739', 'Reactome: R-DME-2022928', 'MetaCyc: PWY-2021', 'MetaCyc: PWY-6687', 'Reactome: R-HSA-2142850', 'MetaCyc: PWY-7487', 'MetaCyc: PWY-7191', 'KEGG: 0…	{'IPR001173', 'IPR029044'}	WP_032330484.1 glycosyltransferase [Escherichia coli]		2013
562.22700.con.0020_3|562.22700			Cluster 7776	7.0	False	False				False		False		False							CDK85607.1 hypothetical protein [Escherichia coli IS25]	True	2014
562.22700.con.0020_4|562.22700	COG0463	M	Cluster 11603	8.0	False	False				False	protein:plasmid:146335 Length: 332 # NCBI annotation: glycosyl transferase, family 2 # Family: family:all:360 # MgeID: mge:731 # MgeName: 1 # Cross-refs: genbank:gi:94972120;genbank:GeneID:4073884	True		False					{'Reactome: R-CEL-913709', 'MetaCyc: PWY-6664', 'MetaCyc: PWY-5800', 'Reactome: R-MMU-4085001', 'MetaCyc: PWY-5818', 'MetaCyc: PWY-7623', 'MetaCyc: PWY-8113', 'MetaCyc: PWY-6051', 'Reactome: R-MMU-190372', 'MetaCyc: PWY-6720', 'Reactome: R-CEL-964739', 'Reactome: R-DME-2022928', 'MetaCyc: PWY-2021', 'MetaCyc: PWY-6687', 'Reactome: R-HSA-2142850', 'MetaCyc: PWY-7487', 'MetaCyc: PWY-7191', 'KEGG: 0…	{'IPR001173', 'IPR029044'}	WP_032330486.1 glycosyltransferase family 2 protein [Escherichia coli]		2015
562.22700.con.0083_6|562.22700			Cluster 33793	7.0	False	False				False	protein:plasmid:10597 Length: 74 # NCBI annotation: putative MobD protein # Family: family:all:1432 # MgeID: mge:201 # MgeName: pAsal3 # Cross-refs: genbank:acc:NP_710180;swissprot:trembl:q8gmn2;genbank:gi:24211011;goa:Q8GMN2;uniprot:Q8GMN2;genbank:GeneID:1218722	True		False						{'IPR006983'}	WP_032242304.1 protein MobD [Escherichia coli]		2016
562.22701.con.0021_64|562.22701	COG4974	L	Cluster 6664	953.0	False	False				False	protein:proph:184621 Length: 387 # NCBI annotation: putative phage integrase # Family: family:all:2 # MgeID: mge:2747 # MgeName: prophinder:44923 # Cross-refs: genbank:acc:NP_836034;genbank:gi:30061863;genbank:GeneID:1076746	True		False	{'GO:0015074', 'GO:0003677', 'GO:0006310'}		{'GO:0003677'}	{'GO:0015074', 'GO:0006310'}	{'MetaCyc: PWY-8179', 'MetaCyc: PWY-8117', 'MetaCyc: PWY-6749', 'Reactome: R-SPO-4615885', 'MetaCyc: PWY-7735', 'MetaCyc: PWY-7127', 'Reactome: R-CEL-4615885', 'Reactome: R-HSA-4615885', 'Reactome: R-DDI-4615885', 'MetaCyc: PWY-6626', 'Reactome: R-MMU-4615885', 'Reactome: R-RNO-4615885', 'MetaCyc: PWY-7419', 'MetaCyc: PWY-7904', 'Reactome: R-SCE-4615885', 'MetaCyc: PWY-6955', 'MetaCyc: PWY-7888',…	{'IPR013762', 'IPR010998', 'IPR044068', 'IPR002104', 'IPR011010'}	STN26388.1 prophage integrase [Escherichia coli]		2017
562.22706.con.0028_17|562.22706			Cluster 34328	20.0	False	False				False		False		False					{'Reactome: R-HSA-8856828', 'MetaCyc: PWY-6027', 'Reactome: R-CEL-3214842', 'Reactome: R-RNO-5696400', 'Reactome: R-HSA-5368598', 'Reactome: R-HSA-1660514', 'Reactome: R-HSA-5693565', 'Reactome: R-DME-5610780', 'MetaCyc: PWY-7693', 'Reactome: R-MMU-2468052', 'Reactome: R-DDI-174178', 'MetaCyc: PWY-6720', 'MetaCyc: PWY-5994', 'MetaCyc: PWY-2723', 'MetaCyc: PWY-8035', 'Reactome: R-XTR-110312', 'Rea…	{'IPR036390', 'IPR036388'}	WP_001520993.1 HTH domain-containing protein [Escherichia coli]		2018
562.22707.con.0020_2|562.22707	COG0443	O	Cluster 2417	2930.0	True	False				False	protein:plasmid:121185 Length: 629 # NCBI annotation: molecular chaperone DnaK # Family: family:all:2208 # MgeID: mge:1145 # MgeName: C # Cross-refs: genbank:gi:75812801;interpro:IPR001023;genbank:GeneID:3678077	True		False	{'GO:0006457', 'GO:0005524', 'GO:0051082', 'GO:0016887'}		{'GO:0005524', 'GO:0051082', 'GO:0016887'}	{'GO:0006457'}	{'Reactome: R-HSA-168330', 'Reactome: R-HSA-8856828', 'Reactome: R-DDI-6798695', 'Reactome: R-GGA-983170', 'Reactome: R-MMU-72163', 'Reactome: R-GGA-5689603', 'Reactome: R-XTR-390522', 'MetaCyc: PWY-5818', 'Reactome: R-MMU-4085001', 'MetaCyc: PWY-7693', 'MetaCyc: PWY-6906', 'Reactome: R-RNO-5250924', 'Reactome: R-GGA-3928662', 'Reactome: R-MMU-390522', 'Reactome: R-RNO-5674135', 'Reactome: R-HSA-…	{'IPR029047', 'IPR013126', 'IPR043129', 'IPR012725', 'IPR029048', 'IPR018181'}	WP_001470959.1 MULTISPECIES: molecular chaperone DnaK [Enterobacteriaceae]		2019
562.22707.con.0034_4|562.22707			Cluster 27397	2928.0	True	False				False		False		False						{'IPR009867'}	WP_025269912.1 MULTISPECIES: YijD family membrane protein [Enterobacteriaceae]		2020
562.22707.con.0069_3|562.22707			Cluster 544	8.0	False	False				False		False		False							WP_001760604.1 hypothetical protein [Escherichia coli]	True	2021
562.22708.con.0112_1|562.22708			Cluster 24911	40.0	False	False				False		False		False							WP_023909147.1 hypothetical protein [Escherichia coli]	True	2022
562.22710.con.0006_141|562.22710			Cluster 19235	2929.0	True	False				False		False		False					{'Reactome: R-HSA-5576892', 'Reactome: R-MMU-5576892', 'Reactome: R-HSA-373752', 'Reactome: R-DRE-5576892'}	{'IPR016123', 'IPR014894'}	ABE09417.1 hypothetical protein UTI89_C3988 [Escherichia coli UTI89]	True	2023
562.22715.con.0018_51|562.22715			Cluster 3260	691.0	False	False				False	protein:plasmid:109457 Length: 560 # NCBI annotation: TniA protein # Family: family:all:107 # MgeID: mge:994 # MgeName: pTP6 # Cross-refs: genbank:gi:84310719;uniprot:Q3BL10;genbank:GeneID:3861051	True		False	{'GO:0015074', 'GO:0003676'}		{'GO:0003676'}	{'GO:0015074'}	{'Reactome: R-SCE-6791226', 'Reactome: R-GGA-6804115', 'Reactome: R-MMU-6804115', 'Reactome: R-SPO-429947', 'Reactome: R-HSA-5693616', 'MetaCyc: PWY-7961', 'Reactome: R-DME-110312', 'Reactome: R-MMU-69183', 'MetaCyc: PWY-7968', 'Reactome: R-HSA-3108214', 'Reactome: R-MMU-5656121', 'Reactome: R-SPO-674695', 'Reactome: R-MMU-69473', 'Reactome: R-RNO-5696400', 'Reactome: R-DME-203927', 'Reactome: R-…	{'IPR036397', 'IPR001584', 'IPR015378', 'IPR012337'}	EKA55113.1 TniA protein [Pseudomonas aeruginosa ATCC 25324]		2024
562.22715.con.0019_56|562.22715			Cluster 17631	202.0	False	False				False	protein:proph:175209 Length: 184 # NCBI annotation: hypothetical protein # Family: family:all:461 # MgeID: mge:2477 # MgeName: prophinder:45139 # Cross-refs: genbank:acc:YP_216184;genbank:gi:62179767;genbank:GeneID:3333651	True		False							CTV93733.1 phage protein [Escherichia coli]		2025
562.22717.con.0032_8|562.22717			Cluster 27165	13.0	False	False				False	protein:proph:176898 Length: 176 # NCBI annotation: hypothetical protein # Family: family:all:67 # MgeID: mge:2522 # MgeName: prophinder:43598 # Cross-refs: genbank:acc:YP_853631;genbank:gi:117624718;genbank:GeneID:4495696	True		False							WP_050011452.1 hypothetical protein [Escherichia coli]	True	2026
562.22719.con.0042_22|562.22719			Cluster 15271	25.0	False	False				False		False		False							EFJ81166.1 hypothetical protein HMPREF9534_02803 [Escherichia coli MS 69-1]	True	2027
562.22720.con.0006_13|562.22720	COG0863	L	Cluster 30891	39.0	False	False				False		False		False	{'GO:0032259', 'GO:0003676', 'GO:0008170', 'GO:0006306', 'GO:0008168', 'GO:0003677'}		{'GO:0003676', 'GO:0008170', 'GO:0003677', 'GO:0008168'}	{'GO:0032259', 'GO:0006306'}	{'MetaCyc: PWY-5301', 'MetaCyc: PWY-6027', 'MetaCyc: PWY-7091', 'MetaCyc: PWY-8007', 'Reactome: R-BTA-71288', 'Reactome: R-DRE-71288', 'MetaCyc: PWY-7161', 'Reactome: R-HSA-9684325', 'MetaCyc: PWY-7407', 'MetaCyc: PWY-6659', 'MetaCyc: PWY-5818', 'MetaCyc: PWY-5110', 'MetaCyc: PWY-7701', 'MetaCyc: PWY-7693', 'MetaCyc: PWY-6906', 'MetaCyc: PWY-7397', 'MetaCyc: PWY-7605', 'Reactome: R-HSA-197264', '…	{'IPR001091', 'IPR002941', 'IPR002052', 'IPR029063'}	WP_001258914.1 adenine-specific DNA-methyltransferase [Escherichia coli]		2028
562.22720.con.0042_33|562.22720			Cluster 35636	11.0	False	False				False	protein:proph:164897 Length: 66 # NCBI annotation: hypothetical protein # Family: family:all:5696 # MgeID: mge:2193 # MgeName: prophinder:43110 # Cross-refs: genbank:acc:YP_001335054;genbank:gi:152969945;genbank:GeneID:5341374	True		False							WP_003835835.1 MULTISPECIES: hypothetical protein [Enterobacteriaceae]	True	2029
562.22720.con.0068_9|562.22720	COG5571	N	Cluster 15202	2929.0	True	False				False		False		False	{'GO:0019867'}	{'GO:0019867'}			{'KEGG: 01040', 'MetaCyc: PWY-5996', 'MetaCyc: PWY-7884', 'KEGG: 00062', 'MetaCyc: PWY-1121', 'Reactome: R-HSA-202733', 'MetaCyc: PWY-6857', 'MetaCyc: PWY-5972', 'MetaCyc: PWY-6733', 'KEGG: 00983', 'MetaCyc: PWY-6303', 'KEGG: 01100', 'MetaCyc: PWY-7723', 'MetaCyc: PWY-321', 'KEGG: 00561', 'MetaCyc: PWY-5148', 'KEGG: 01110'}	{'IPR005546', 'IPR036709', 'IPR006315'}	ELC13619.1 outer membrane autotransporter barrel domain-containing protein [Escherichia coli KTE10]		2030
562.22721.con.0047_1|562.22721			Cluster 22488	10.0	False	False				False		False		False							SRB39425.1 iron/manganese transport system periplasmic binding protein SitA [Escherichia coli]		2031
562.22722.con.0001_3|562.22722	COG1051	F	Cluster 25595	2926.0	True	False				False		False		False	{'GO:0016787'}		{'GO:0016787'}		{'MetaCyc: PWY-7356', 'MetaCyc: PWY-8176', 'Reactome: R-CEL-2393930', 'KEGG: 00230', 'MetaCyc: PWY-7878', 'KEGG: 00785', 'Reactome: R-CEL-390918', 'MetaCyc: PWY-6575', 'KEGG: 00790', 'Reactome: R-MMU-390918', 'Reactome: R-MMU-72163', 'Reactome: R-RNO-9033241', 'MetaCyc: PWY-6368', 'Reactome: R-CEL-450385', 'Reactome: R-MMU-191273', 'Reactome: R-SCE-1855167', 'MetaCyc: PWY-7187', 'Reactome: R-HSA-…	{'IPR020476', 'IPR000086', 'IPR020084', 'IPR015797'}	WP_000781866.1 MULTISPECIES: pyrimidine (deoxy)nucleoside triphosphate diphosphatase [Enterobacteriaceae]		2032
562.22722.con.0001_42|562.22722			Cluster 2240	2905.0	True	False				False		False		False					{'MetaCyc: PWY-5301', 'Reactome: R-SSC-933542', 'Reactome: R-HSA-209560', 'Reactome: R-HSA-2995383', 'Reactome: R-RNO-5689880', 'MetaCyc: PWY-6027', 'Reactome: R-MMU-8876198', 'Reactome: R-MMU-983695', 'MetaCyc: PWY-7161', 'Reactome: R-HSA-5693565', 'MetaCyc: PWY-7407', 'Reactome: R-RNO-1810476', 'MetaCyc: PWY-5800', 'Reactome: R-MMU-350054', 'Reactome: R-HSA-5620916', 'MetaCyc: PWY-7693', 'React…	{'IPR036770', 'IPR012927'}	WP_096251715.1 ShET2/EspL2 family type III secretion system effector toxin [Escherichia coli]		2033
562.22722.con.0077_14|562.22722			Cluster 37556	35.0	False	False				False		False		False							CTY01732.1 Uncharacterised protein [Escherichia coli]	True	2034
562.22722.con.0123_2|562.22722	COG3547	L	Cluster 10031	203.0	False	False				False	protein:plasmid:149673 Length: 339 # NCBI annotation: putative transposase # Family: family:all:27 # MgeID: mge:823 # MgeName: pHG1 # Cross-refs: genbank:gi:38638073;genbank:GeneID:2656756	True		False	{'GO:0004803', 'GO:0006313', 'GO:0003677'}		{'GO:0004803', 'GO:0003677'}	{'GO:0006313'}		{'IPR003346'}	EGB64344.1 transposase [Escherichia coli TA007]		2035
562.22723.con.0002_240|562.22723	COG2332	O	Cluster 22590	2926.0	True	False				False	protein:plasmid:149576 Length: 155 # NCBI annotation: cytochrome C-type biogenesis protein # Family: family:all:4527 # MgeID: mge:823 # MgeName: pHG1 # Cross-refs: genbank:gi:38637881;genbank:GeneID:2656659	True		False	{'GO:0005886', 'GO:0017004', 'GO:0020037', 'GO:0017003'}	{'GO:0005886'}	{'GO:0020037'}	{'GO:0017004', 'GO:0017003'}		{'IPR036127', 'IPR004329'}	WP_071686834.1 cytochrome c maturation protein CcmE [Escherichia coli]		2036
562.22728.con.0025_14|562.22728	COG3497	R	Cluster 4600	781.0	False	False				False	protein:proph:174991 Length: 475 # NCBI annotation: bacteriophage tail sheath protein # Family: family:all:115 # MgeID: mge:2471 # MgeName: prophinder:45430 # Cross-refs: genbank:acc:NP_805159;genbank:gi:29141817;genbank:GeneID:1070791	True		False						{'IPR020287', 'IPR035089'}	WP_062874634.1 phage tail protein [Escherichia coli]		2037
562.22729.con.0050_3|562.22729	COG3657	S	Cluster 28440	100.0	False	False				False	protein:plasmid:150864 Length: 113 # NCBI annotation: protein of unknown function DUF891 # Family: family:all:600 # MgeID: mge:1816 # MgeName: pPNAP01 # Cross-refs: genbank:gi:121582725;interpro:IPR009241;genbank:GeneID:4685474	True		False						{'IPR009241', 'IPR014056', 'IPR035093'}	WP_001146936.1 MULTISPECIES: addiction module killer protein [Enterobacteriaceae]		2038
562.22730.con.0013_97|562.22730	COG0585	S	Cluster 9495	2930.0	True	False				False		False		False	{'GO:0001522', 'GO:0003723', 'GO:0009982', 'GO:0009451'}		{'GO:0009982', 'GO:0003723'}	{'GO:0001522', 'GO:0009451'}	{'MetaCyc: PWY-7599', 'Reactome: R-DDI-171319', 'Reactome: R-MMU-171319', 'Reactome: R-RNO-171319', 'Reactome: R-HSA-171319', 'KEGG: 00740', 'MetaCyc: PWY-7251', 'Reactome: R-SPO-171319', 'Reactome: R-GGA-417076', 'MetaCyc: PWY-7419', 'KEGG: 01100', 'MetaCyc: PWY-6167', 'Reactome: R-CEL-171319', 'Reactome: R-HSA-6790901', 'MetaCyc: PWY-6168', 'MetaCyc: PWY-7991', 'Reactome: R-DME-171319', 'Reacto…	{'IPR011760', 'IPR020119', 'IPR043165', 'IPR001656', 'IPR020103', 'IPR042214'}	WP_000568928.1 tRNA pseudouridine(13) synthase TruD [Escherichia coli]		2039
562.22730.con.0059_13|562.22730			Cluster 29270	2833.0	False	False				False	protein:plasmid:158225 Length: 92 # NCBI annotation: hypothetical protein # Family: family:all:20766 # MgeID: mge:1997 # MgeName: pESA3 # Cross-refs: genbank:gi:156936577;genbank:GeneID:5552558	True		False	{'GO:0071468'}			{'GO:0071468'}		{'IPR024753'}	WP_000888771.1 MULTISPECIES: regulatory protein AriR [Escherichia]		2040
562.22737.con.0022_8|562.22737			Cluster 17697	31.0	False	False				False		False		False							ELC38539.1 hypothetical protein WE9_03551 [Escherichia coli KTE21]	True	2041
562.22741.con.0008_1|562.22741	COG3203	M	Cluster 31681	10.0	False	False				False	protein:proph:181170 Length: 380 # NCBI annotation: outer membrane porin protein NmpC precursor # Family: family:all:775 # MgeID: mge:2647 # MgeName: prophinder:43025 # Cross-refs: genbank:acc:YP_540314;genbank:gi:91210328;genbank:GeneID:3989963	True		False	{'GO:0015288', 'GO:0009279', 'GO:0016020', 'GO:0034220'}	{'GO:0009279', 'GO:0016020'}	{'GO:0015288'}	{'GO:0034220'}	{'Reactome: R-HSA-168179', 'Reactome: R-RNO-5689880', 'Reactome: R-HSA-1268020', 'Reactome: R-HSA-166058', 'Reactome: R-CEL-70268', 'Reactome: R-BTA-5205685', 'Reactome: R-HSA-8949215', 'Reactome: R-SSC-70268', 'Reactome: R-RNO-70268', 'Reactome: R-HSA-5205685', 'Reactome: R-DME-5689880', 'Reactome: R-CEL-5205685', 'Reactome: R-SSC-5689880', 'Reactome: R-HSA-5603041', 'Reactome: R-RNO-5205685', '…	{'IPR001897', 'IPR023614', 'IPR001702'}	WP_000977905.1 MULTISPECIES: porin OmpF [Enterobacteriaceae]		2042
562.22741.con.0016_65|562.22741			Cluster 34146	2918.0	True	False				False		False		False						{'IPR020117'}	WP_023910283.1 MULTISPECIES: DUF2554 family protein [Enterobacteriaceae]	True	2043
562.22741.con.0056_5|562.22741			Cluster 31516	2911.0	True	False				False		False		False						{'IPR019625'}	KDW69708.1 biofilm-dependent modulation family protein [Escherichia coli 1-392-07_S1_C1]		2044
562.22743.con.0003_267|562.22743			Cluster 23347	9.0	False	False				False		False		False							WP_001248439.1 MULTISPECIES: hypothetical protein [Escherichia]	True	2045
562.22743.con.0005_200|562.22743	COG3188	M	Cluster 431	2923.0	True	False				False	protein:plasmid:24957 Length: 843 # NCBI annotation: SefC # Family: family:all:833 # MgeID: mge:601 # MgeName: pADAP # Cross-refs: genbank:acc:NP_938127;genbank:gi:38201760;genbank:GeneID:2648262	True		False	{'GO:0071555', 'GO:0016020', 'GO:0043711', 'GO:0005515', 'GO:0015473', 'GO:0061077', 'GO:0030288', 'GO:0009297'}	{'GO:0030288', 'GO:0016020'}	{'GO:0005515', 'GO:0015473'}	{'GO:0061077', 'GO:0009297', 'GO:0043711', 'GO:0071555'}	{'Reactome: R-HSA-8856828', 'Reactome: R-RNO-210991', 'Reactome: R-MMU-2024096', 'Reactome: R-MMU-983695', 'Reactome: R-HSA-1660514', 'Reactome: R-MMU-419037', 'Reactome: R-HSA-5620916', 'Reactome: R-MMU-9027276', 'Reactome: R-HSA-2424491', 'MetaCyc: PWY-6051', 'MetaCyc: PWY-6720', 'Reactome: R-MMU-388841', 'MetaCyc: PWY-7057', 'Reactome: R-MMU-437239', 'MetaCyc: PWY-7487', 'Reactome: R-DDI-15976…	{'IPR042186', 'IPR013783', 'IPR016147', 'IPR018030', 'IPR001829', 'IPR018046', 'IPR043142', 'IPR025885', 'IPR000015', 'IPR036316', 'IPR016148', 'IPR025949', 'IPR037224', 'IPR008962'}	WP_021535395.1 fimbrial biogenesis outer membrane usher protein [Escherichia coli]		2046
562.22743.con.0021_37|562.22743			Cluster 4799	1936.0	False	False				False	protein:plasmid:123198 Length: 458 # NCBI annotation: TraH # Family: family:all:307 # MgeID: mge:845 # MgeName: pAPEC-O2-ColV # Cross-refs: genbank:gi:84060759;genbank:GeneID:3853400	True		False						{'IPR010927'}	WP_072021271.1 conjugal transfer protein TraH [Escherichia coli]		2047
562.22745.con.0009_151|562.22745			Cluster 24643	2918.0	True	False				False		False		False	{'GO:0044780', 'GO:0045893'}			{'GO:0044780', 'GO:0045893'}		{'IPR023559', 'IPR036194'}	WP_096264776.1 flagellar transcriptional regulator FlhD [Escherichia coli]		2048
562.22746.con.0045_9|562.22746	COG4795	U	Cluster 9981	2930.0	True	False				False		False		False						{'IPR012902'}	EHP66482.1 prepilin peptidase-dependent protein A [Escherichia coli 4_1_47FAA]		2049
562.22746.con.0095_7|562.22746			Cluster 30718	13.0	False	False				False	protein:plasmid:15778 Length: 150 # NCBI annotation: hypothetical protein # Family: family:all:36 # MgeID: mge:365 # MgeName: pB171 # Cross-refs: genbank:acc:NP_053089;genbank:gi:10955377;genbank:GeneID:1238630	True		False							EFK49392.1 hypothetical protein HMPREF9345_04129 [Escherichia coli MS 107-1]	True	2050
562.22746.con.0178_1|562.22746	COG2746	V	Cluster 13103	270.0	False	True	AAC(3)-IIc	3002535.0	{AAC3}	True	protein:plasmid:158818 Length: 286 # NCBI annotation: aminoglycoside-(3)-N-acetyltransferase type II # Family: family:all:2693 # MgeID: mge:738 # MgeName: pU302L # Cross-refs: genbank:gi:58383301;genbank:GeneID:3259817	True		False	{'GO:0046677', 'GO:0046353'}		{'GO:0046353'}	{'GO:0046677'}	{'MetaCyc: PWY-6032', 'MetaCyc: PWY-6314', 'MetaCyc: PWY-8075', 'MetaCyc: PWY-7702', 'MetaCyc: PWY-6027', 'MetaCyc: PWY-7050', 'MetaCyc: PWY-8084', 'MetaCyc: PWY-8036', 'MetaCyc: PWY-7407', 'MetaCyc: PWY-5903', 'MetaCyc: PWY-8166', 'MetaCyc: PWY-6948', 'MetaCyc: PWY-7693', 'MetaCyc: PWY-7470', 'MetaCyc: PWY-8055', 'MetaCyc: PWY-7656', 'MetaCyc: PWY-7168', 'MetaCyc: PWY-5875', 'MetaCyc: PWY-7984',…	{'IPR003679', 'IPR028345'}	WP_000557454.1 MULTISPECIES: aminoglycoside N-acetyltransferase AAC(3)-IId [Bacteria]		2051
562.22748.con.0084_1|562.22748			Cluster 13362	506.0	False	True	aadA4	3002604.0	{ANT3, ANT9, ANT}	True	protein:plasmid:115868 Length: 262 # NCBI annotation: aminoglycoside-3''-adenylyltransferase # Family: family:all:373 # MgeID: mge:756 # MgeName: Rms149 # Cross-refs: genbank:gi:66968563;genbank:GeneID:3399412	True		False	{'GO:0016779'}		{'GO:0016779'}		{'Reactome: R-RNO-5693571', 'MetaCyc: PWY-8176', 'Reactome: R-RNO-5689880', 'KEGG: 00230', 'MetaCyc: PWY-7878', 'Reactome: R-SPO-429947', 'Reactome: R-HSA-5649702', 'Reactome: R-DRE-110362', 'MetaCyc: PWY-6575', 'Reactome: R-MMU-72163', 'MetaCyc: PWY-6368', 'Reactome: R-DRE-110381', 'Reactome: R-HSA-110373', 'MetaCyc: PWY-6720', 'MetaCyc: PWY-8052', 'Reactome: R-HSA-909733', 'Reactome: R-MMU-8983…	{'IPR002934', 'IPR043519', 'IPR025184'}	WP_004356282.1 MULTISPECIES: ANT(3'')-Ia family aminoglycoside nucleotidyltransferase AadA4 [Proteobacteria]		2052
562.22749.con.0088_1|562.22749	COG3316	L	Cluster 13831	581.0	False	False				False	protein:plasmid:158855 Length: 264 # NCBI annotation: IS6100 transposase # Family: family:all:17 # MgeID: mge:738 # MgeName: pU302L # Cross-refs: genbank:gi:58383332;genbank:GeneID:3259854	True		False	{'GO:0015074'}			{'GO:0015074'}	{'Reactome: R-SCE-6791226', 'Reactome: R-GGA-6804115', 'Reactome: R-MMU-6804115', 'Reactome: R-SPO-429947', 'Reactome: R-HSA-5693616', 'MetaCyc: PWY-7961', 'Reactome: R-DME-110312', 'Reactome: R-MMU-69183', 'MetaCyc: PWY-7968', 'Reactome: R-HSA-3108214', 'Reactome: R-MMU-5656121', 'Reactome: R-SPO-674695', 'Reactome: R-MMU-69473', 'Reactome: R-RNO-5696400', 'Reactome: R-DME-203927', 'Reactome: R-…	{'IPR001584', 'IPR032874', 'IPR012337'}	WP_079156009.1 IS6-like element IS6100 family transposase [Escherichia coli]		2053
562.22750.con.0066_7|562.22750			Cluster 31178	51.0	False	False				False		False		False							EQR37540.1 hypothetical protein G785_04807 [Escherichia coli HVH 125 (4-2634716)]	True	2054
562.22751.con.0091_9|562.22751			Cluster 37402	44.0	False	False				False	protein:plasmid:16025 Length: 253 # NCBI annotation: hypothetical protein # Family: family:all:282 # MgeID: mge:370 # MgeName: p1658/97 # Cross-refs: genbank:acc:NP_863008;genbank:gi:32470066;genbank:GeneID:1446566	True		False							ELE85584.1 hypothetical protein A1W1_00032, partial [Escherichia coli KTE83]	True	2055
562.22753.con.0005_306|562.22753	COG1230	P	Cluster 11443	2930.0	True	False				False	protein:plasmid:115845 Length: 325 # NCBI annotation: Cation efflux protein # Family: family:all:451 # MgeID: mge:1836 # MgeName: E # Cross-refs: genbank:gi:125654713;genbank:GeneID:4796517	True		False	{'GO:0016020', 'GO:0008324', 'GO:0055085', 'GO:0006829', 'GO:0016021', 'GO:0005385', 'GO:0006812'}	{'GO:0016021', 'GO:0016020'}	{'GO:0005385', 'GO:0008324'}	{'GO:0055085', 'GO:0006829', 'GO:0006812'}	{'Reactome: R-HSA-425410', 'Reactome: R-XTR-435368', 'Reactome: R-SCE-264876', 'Reactome: R-SPO-435368', 'Reactome: R-SPO-425410', 'Reactome: R-GGA-264876', 'Reactome: R-MMU-264876', 'Reactome: R-XTR-264876', 'Reactome: R-CEL-435368', 'Reactome: R-DRE-435368', 'Reactome: R-CEL-425410', 'Reactome: R-SCE-425410', 'Reactome: R-MMU-425410', 'Reactome: R-BTA-435368', 'Reactome: R-HSA-264876', 'Reactom…	{'IPR002524', 'IPR027469', 'IPR036837', 'IPR023500'}	WP_054623077.1 CDF family zinc transporter ZitB [Escherichia coli]		2056
562.22754.con.0014_153|562.22754			Cluster 20794	14.0	False	False				False		False		False					{'Reactome: R-SCE-6791226', 'Reactome: R-DRE-69473', 'Reactome: R-HSA-5693616', 'Reactome: R-SCE-5358565', 'Reactome: R-DRE-110362', 'Reactome: R-MMU-69473', 'Reactome: R-HSA-975957', 'Reactome: R-DDI-5358565', 'Reactome: R-CEL-450385', 'Reactome: R-HSA-5358565', 'Reactome: R-DRE-5685938', 'Reactome: R-HSA-450513', 'Reactome: R-HSA-5685938', 'Reactome: R-HSA-5693579', 'Reactome: R-MMU-174437', 'R…	{'IPR029060', 'IPR002716'}	WP_001263856.1 MULTISPECIES: PIN domain-containing protein [Enterobacteriaceae]		2057
562.22754.con.0014_154|562.22754			Cluster 16333	14.0	False	False				False		False		False							WP_000749484.1 MULTISPECIES: hypothetical protein [Enterobacteriaceae]	True	2058
562.22754.con.0014_159|562.22754			Cluster 2000	15.0	False	False				False	protein:vir:185 Length: 710 # NCBI annotation: tail spike protein # Family: family:all:785 # MgeID: mge:5 # MgeName: HK620 # Cross-refs: genbank:acc:NP_112090;genbank:gi:13559880;genbank:GeneID:920967	True		False	{'GO:0009405'}			{'GO:0009405'}	{'MetaCyc: PWY-5301', 'MetaCyc: PWY-7091', 'MetaCyc: PWY-6855', 'MetaCyc: PWY-8036', 'MetaCyc: PWY-7161', 'MetaCyc: PWY-5729', 'KEGG: 00531', 'MetaCyc: PWY-7631', 'MetaCyc: PWY-6948', 'MetaCyc: PWY-6795', 'MetaCyc: PWY-6906', 'MetaCyc: PWY-7151', 'MetaCyc: PWY-5748', 'MetaCyc: PWY-5305', 'MetaCyc: PWY-7668', 'KEGG: 00051', 'MetaCyc: PWY-8047', 'MetaCyc: PWY-7133', 'MetaCyc: PWY-7057', 'MetaCyc: P…	{'IPR036730', 'IPR009093', 'IPR012334', 'IPR006626', 'IPR011050'}	KDN08615.1 Phage tail fiber [Escherichia coli]		2059
562.22756.con.0064_22|562.22756	COG1169	H	Cluster 5804	2930.0	True	False				False		False		False	{'GO:0009058', 'GO:0008909', 'GO:0009234'}		{'GO:0008909'}	{'GO:0009058', 'GO:0009234'}	{'MetaCyc: PWY-6120', 'MetaCyc: PWY-8032', 'KEGG: 00790', 'MetaCyc: PWY-5958', 'KEGG: 01053', 'MetaCyc: PWY-5770', 'MetaCyc: PWY-3461', 'MetaCyc: PWY-6543', 'KEGG: 01100', 'MetaCyc: PWY-6661', 'KEGG: 00400', 'KEGG: 01059', 'KEGG: 00130', 'MetaCyc: PWY-6406', 'MetaCyc: PWY-5837', 'MetaCyc: PWY-5901', 'KEGG: 00405', 'MetaCyc: PWY-7626', 'MetaCyc: PWY-3462', 'MetaCyc: PWY-6627', 'KEGG: 01110'}	{'IPR044250', 'IPR015890', 'IPR005801', 'IPR034681', 'IPR004561'}	WP_001191430.1 isochorismate synthase MenF [Escherichia coli]		2060
562.22756.con.0136_2|562.22756			Cluster 7823	32.0	False	False				False		False		False						{'IPR026440', 'IPR017642', 'IPR017601'}	WP_072048481.1 MULTISPECIES: DGQHR domain-containing protein [Enterobacteriaceae]		2061
562.22762.con.0018_97|562.22762			Cluster 27272	2927.0	True	False				False		False		False						{'IPR010854', 'IPR025543', 'IPR036275'}	WP_000254626.1 lipoprotein BsmA [Escherichia coli]		2062
562.22762.con.0020_11|562.22762			Cluster 23240	18.0	False	False				False		False		False							WP_023352813.1 MULTISPECIES: hypothetical protein [Enterobacteriaceae]	True	2063
562.22762.con.0020_12|562.22762			Cluster 28199	18.0	False	False				False		False		False							WP_000093550.1 MULTISPECIES: hypothetical protein [Enterobacteriaceae]	True	2064
562.22764.con.0037_27|562.22764			Cluster 13172	196.0	False	False				False	protein:plasmid:125619 Length: 313 # NCBI annotation: w0042 # Family: family:all:3693 # MgeID: mge:1922 # MgeName: pSFO157 # Cross-refs: genbank:gi:149930784;genbank:GeneID:5290936	True		False							KDW50351.1 hypothetical protein AB82_5143 [Escherichia coli 2-005-03_S3_C1]	True	2065
562.22766.con.0054_2|562.22766	COG4275	S	Cluster 37561	7.0	False	False				False	protein:plasmid:30014 Length: 314 # NCBI annotation: chromate resistance protein # Family: family:all:681 # MgeID: mge:674 # MgeName: pB4 # Cross-refs: genbank:acc:NP_598136;swissprot:trembl:q8rsk3;genbank:gi:19352378;goa:Q8RSK3;uniprot:Q8RSK3;genbank:GeneID:1245376	True		False							KLV84751.1 hypothetical protein SK40_04082 [Citrobacter sp. BIDMC108]	True	2066
562.22767.con.0041_10|562.22767			Cluster 27862	12.0	False	False				False	protein:plasmid:24349 Length: 126 # NCBI annotation: hypothetical protein # Family: family:all:1519 # MgeID: mge:588 # MgeName: pHCM2 # Cross-refs: genbank:acc:NP_569496;genbank:gi:18466689;genbank:GeneID:1251412	True		False						{'IPR025915'}	WP_063612283.1 hypothetical protein [Escherichia coli]	True	2067
562.22770.con.0016_43|562.22770			Cluster 2670	13.0	False	False				False		False		False							WP_001288417.1 hypothetical protein [Escherichia coli]	True	2068
562.22772.con.0003_242|562.22772			Cluster 22197	37.0	False	False				False		False		False							ESD85517.1 hypothetical protein HMPREF1613_03699 [Escherichia coli 908616]	True	2069
562.22775.con.0036_21|562.22775	COG2186	K	Cluster 15988	2929.0	True	False				False	protein:plasmid:27273 Length: 233 # NCBI annotation: transcriptional regulator NanR # Family: family:all:20 # MgeID: mge:608 # MgeName: pSymB # Cross-refs: genbank:acc:NP_436824;genbank:gi:16264032;genbank:GeneID:1236615	True		False	{'GO:0000062', 'GO:0019217', 'GO:0006355', 'GO:0003700', 'GO:0003677'}		{'GO:0000062', 'GO:0003677', 'GO:0003700'}	{'GO:0006355', 'GO:0019217'}	{'Reactome: R-HSA-8856828', 'MetaCyc: PWY-6027', 'Reactome: R-CEL-3214842', 'Reactome: R-RNO-5696400', 'Reactome: R-HSA-5368598', 'Reactome: R-HSA-1660514', 'Reactome: R-HSA-5693565', 'Reactome: R-DME-5610780', 'MetaCyc: PWY-7693', 'Reactome: R-MMU-2468052', 'Reactome: R-DDI-174178', 'MetaCyc: PWY-6720', 'MetaCyc: PWY-5994', 'MetaCyc: PWY-2723', 'MetaCyc: PWY-8035', 'Reactome: R-XTR-110312', 'Rea…	{'IPR008920', 'IPR036390', 'IPR014178', 'IPR028374', 'IPR000524', 'IPR036388'}	ABF03401.1 fatty acid metabolism regulator [Shigella flexneri 5 str. 8401]		2070
562.22776.con.0012_5|562.22776	COG3468	MU	Cluster 281	524.0	False	False				False	protein:plasmid:123351 Length: 1377 # NCBI annotation: Tsh # Family: family:all:60 # MgeID: mge:845 # MgeName: pAPEC-O2-ColV # Cross-refs: genbank:gi:84060920;genbank:GeneID:3853553	True		False	{'GO:0006508', 'GO:0004252', 'GO:0019867', 'GO:0004175'}	{'GO:0019867'}	{'GO:0004252', 'GO:0004175'}	{'GO:0006508'}	{'MetaCyc: PWY-5301', 'MetaCyc: PWY-7091', 'MetaCyc: PWY-6855', 'MetaCyc: PWY-8036', 'MetaCyc: PWY-7161', 'MetaCyc: PWY-5729', 'KEGG: 00531', 'MetaCyc: PWY-5996', 'MetaCyc: PWY-7631', 'MetaCyc: PWY-6948', 'MetaCyc: PWY-6795', 'MetaCyc: PWY-6906', 'KEGG: 01040', 'MetaCyc: PWY-7151', 'MetaCyc: PWY-1121', 'MetaCyc: PWY-5748', 'MetaCyc: PWY-5305', 'MetaCyc: PWY-7668', 'KEGG: 00051', 'MetaCyc: PWY-804…	{'IPR036709', 'IPR012332', 'IPR005546', 'IPR030396', 'IPR011050', 'IPR006315', 'IPR000710'}	WP_024188054.1 autotransporter outer membrane beta-barrel domain-containing protein [Escherichia coli]		2071
562.22779.con.0017_4|562.22779			Cluster 15358	10.0	False	False				False		False		False							WP_068862862.1 hypothetical protein [Escherichia coli]	True	2072
562.22780.con.0015_122|562.22780			Cluster 36373	2925.0	True	False				False		False		False						{'IPR015051', 'IPR036489'}	WP_001015433.1 MULTISPECIES: DUF1869 domain-containing protein [Enterobacteriaceae]	True	2073
562.22780.con.0025_3|562.22780	COG1344	N	Cluster 3261	9.0	False	False				False	protein:plasmid:21396 Length: 273 # NCBI annotation: FLAGELLIN PROTEIN # Family: family:all:2252 # MgeID: mge:570 # MgeName: pGMI1000MP # Cross-refs: genbank:acc:NP_521943;genbank:gi:17548603;genbank:GeneID:1222689	True		False	{'GO:0009420', 'GO:0005198', 'GO:0071973'}	{'GO:0009420'}	{'GO:0005198'}	{'GO:0071973'}	{'Reactome: R-GGA-433822', 'Reactome: R-HSA-168176', 'Reactome: R-GGA-451534', 'Reactome: R-GGA-977240', 'Reactome: R-HSA-844623', 'Reactome: R-HSA-5603037', 'Reactome: R-HSA-5602680', 'Reactome: R-HSA-975871'}	{'IPR001492', 'IPR032826', 'IPR001029'}	WP_023486395.1 MULTISPECIES: flagellin FliC [Enterobacteriaceae]		2074
562.22791.con.0004_274|562.22791	COG3444	G	Cluster 10909	2926.0	True	False				False	protein:plasmid:14401 Length: 325 # NCBI annotation: Mannose-specific phosphotransferase system component IIAB # Family: family:all:3668 # MgeID: mge:292 # MgeName: pSOL1 # Cross-refs: genbank:acc:NP_149230;genbank:gi:15004770;genbank:GeneID:1116071	True		False	{'GO:0009401', 'GO:0005737', 'GO:0016773', 'GO:0008643', 'GO:0016021', 'GO:0008982'}	{'GO:0016021', 'GO:0005737'}	{'GO:0008982', 'GO:0016773'}	{'GO:0009401', 'GO:0008643'}	{'MetaCyc: PWY-6955', 'MetaCyc: PWY-7077', 'MetaCyc: PWY-8129', 'MetaCyc: PWY-6682', 'KEGG: 01120', 'MetaCyc: PWY-7886', 'MetaCyc: PWY-7769', 'MetaCyc: PWY-6369', 'MetaCyc: PWY-5129', 'MetaCyc: PWY-7740', 'MetaCyc: PWY-7321', 'KEGG: 01100', 'MetaCyc: PWY-6322', 'KEGG: 00051', 'MetaCyc: PWY-7975', 'KEGG: 00520', 'KEGG: 00561', 'MetaCyc: PWY-7948', 'MetaCyc: PWY-6626'}	{'IPR004701', 'IPR004720', 'IPR033887', 'IPR018455', 'IPR013789', 'IPR036662', 'IPR036667'}	WP_096846739.1 PTS mannose transporter subunit IIAB [Escherichia coli]		2075
562.22794.con.0052_10|562.22794			Cluster 31686	146.0	False	False				False	protein:plasmid:158838 Length: 97 # NCBI annotation: hypothetical protein # Family: family:all:9019 # MgeID: mge:738 # MgeName: pU302L # Cross-refs: genbank:gi:58383333;genbank:GeneID:3259837	True		False							WP_004193172.1 MULTISPECIES: hypothetical protein [Enterobacteriaceae]	True	2076
562.22795.con.0001_274|562.22795	COG3925	G	Cluster 2973	2929.0	True	False				False	protein:plasmid:15152 Length: 598 # NCBI annotation: PTS system, fructose-specific IIBC component # Family: family:all:3070 # MgeID: mge:340 # MgeName: MP1 # Cross-refs: genbank:acc:NP_051609;genbank:gi:10957462;genbank:GeneID:1799878	True		False	{'GO:0009401', 'GO:0005351', 'GO:0016020', 'GO:0022877', 'GO:0016021', 'GO:0008982'}	{'GO:0016021', 'GO:0016020'}	{'GO:0022877', 'GO:0008982', 'GO:0005351'}	{'GO:0009401'}	{'KEGG: 01120', 'MetaCyc: PWY-6369', 'MetaCyc: PWY-7975', 'MetaCyc: PWY-7077', 'KEGG: 00053', 'KEGG: 00051', 'KEGG: 00520', 'MetaCyc: PWY-7740', 'MetaCyc: PWY-6626', 'MetaCyc: PWY-8129', 'MetaCyc: PWY-6682', 'KEGG: 00052', 'MetaCyc: PWY-7321', 'KEGG: 01100', 'MetaCyc: PWY-7948', 'KEGG: 00010', 'MetaCyc: PWY-6955', 'MetaCyc: PWY-7886', 'MetaCyc: PWY-7769', 'KEGG: 00500', 'MetaCyc: PWY-6322', 'Meta…	{'IPR003353', 'IPR013011', 'IPR013014', 'IPR006327', 'IPR003501', 'IPR003352', 'IPR036095'}	WP_000854451.1 PTS fructose transporter subunit IIBC [Escherichia coli]		2077
562.22797.con.0017_1|562.22797			Cluster 35647	8.0	False	False				False		False		False							WP_077791386.1 hypothetical protein, partial [Escherichia coli]	True	2078
562.22807.con.0005_96|562.22807	COG0732	V	Cluster 7729	10.0	False	False				False	protein:proph:172149 Length: 390 # NCBI annotation: restriction endonuclease S subunits-like # Family: family:all:128 # MgeID: mge:2398 # MgeName: prophinder:44778 # Cross-refs: genbank:acc:YP_389913;genbank:gi:78358464;genbank:GeneID:3758402	True		False	{'GO:0003677', 'GO:0006304'}		{'GO:0003677'}	{'GO:0006304'}		{'IPR000055'}	WP_072275279.1 restriction endonuclease subunit S [Escherichia coli]		2079
562.22807.con.0009_179|562.22807			Cluster 16469	10.0	False	False				False		False		False							WP_001061059.1 hypothetical protein [Escherichia coli]	True	2080
562.22807.con.0009_180|562.22807			Cluster 29528	10.0	False	False				False		False		False						{'IPR022553'}	WP_000982342.1 DUF2645 family protein [Escherichia coli]	True	2081
562.22807.con.0011_115|562.22807			Cluster 22198	26.0	False	False				False		False		False	{'GO:0006355', 'GO:0003700', 'GO:0016987', 'GO:0006352', 'GO:0003677'}		{'GO:0003677', 'GO:0016987', 'GO:0003700'}	{'GO:0006352', 'GO:0006355'}	{'Reactome: R-HSA-8856828', 'MetaCyc: PWY-6027', 'Reactome: R-CEL-3214842', 'Reactome: R-RNO-5696400', 'Reactome: R-HSA-5368598', 'Reactome: R-HSA-1660514', 'Reactome: R-HSA-5693565', 'Reactome: R-DME-5610780', 'MetaCyc: PWY-7693', 'Reactome: R-DDI-174178', 'MetaCyc: PWY-6720', 'MetaCyc: PWY-5994', 'MetaCyc: PWY-2723', 'MetaCyc: PWY-8035', 'Reactome: R-XTR-110312', 'Reactome: R-DME-4086400', 'Met…	{'IPR013249', 'IPR013324', 'IPR036388'}	WP_001054916.1 DNA-directed RNA polymerase sigma-70 factor [Escherichia coli]		2082
562.22807.con.0011_116|562.22807			Cluster 21497	24.0	False	False				False		False		False	{'GO:0007155', 'GO:0009289'}	{'GO:0009289'}		{'GO:0007155'}		{'IPR008966', 'IPR036937'}	WP_001361567.1 MULTISPECIES: hypothetical protein [Escherichia]	True	2083
562.22807.con.0011_118|562.22807	COG3121	NU	Cluster 16901	26.0	False	False				False	protein:plasmid:24824 Length: 230 # NCBI annotation: chaperone # Family: family:all:991 # MgeID: mge:596 # MgeName: pSLT # Cross-refs: genbank:acc:NP_490508;genbank:gi:17233481;genbank:GeneID:1256223	True		False	{'GO:0030288', 'GO:0043711', 'GO:0061077', 'GO:0071555'}	{'GO:0030288'}		{'GO:0061077', 'GO:0043711', 'GO:0071555'}	{'Reactome: R-HSA-8856828', 'Reactome: R-RNO-210991', 'Reactome: R-MMU-2024096', 'Reactome: R-MMU-983695', 'Reactome: R-HSA-1660514', 'Reactome: R-MMU-419037', 'Reactome: R-HSA-5620916', 'Reactome: R-MMU-9027276', 'Reactome: R-HSA-2424491', 'MetaCyc: PWY-6051', 'MetaCyc: PWY-6720', 'Reactome: R-MMU-388841', 'MetaCyc: PWY-7057', 'Reactome: R-MMU-437239', 'MetaCyc: PWY-7487', 'Reactome: R-DDI-15976…	{'IPR013783', 'IPR016147', 'IPR001829', 'IPR036316', 'IPR008962'}	EGI25159.1 chaperone protein FanE [Escherichia coli TA206]		2084
562.22807.con.0011_119|562.22807			Cluster 10999	26.0	False	False				False		False		False	{'GO:0007155', 'GO:0009289'}	{'GO:0009289'}		{'GO:0007155'}		{'IPR008966', 'IPR036937'}	WP_001170858.1 fimbrial protein [Escherichia coli]		2085
562.22807.con.0011_120|562.22807			Cluster 21717	26.0	False	False				False		False		False	{'GO:0007155', 'GO:0009289'}	{'GO:0009289'}		{'GO:0007155'}		{'IPR000259', 'IPR008966', 'IPR036937'}	WP_000521294.1 fimbrial protein [Escherichia coli]		2086
562.22807.con.0011_121|562.22807	COG3539	NU	Cluster 21793	26.0	False	False				False		False		False	{'GO:0007155', 'GO:0009289'}	{'GO:0009289'}		{'GO:0007155'}		{'IPR008966', 'IPR036937'}	WP_000610758.1 fimbrial protein [Escherichia coli]		2087
562.22807.con.0011_122|562.22807	COG3468	MU	Cluster 299	26.0	False	False				False	protein:plasmid:123351 Length: 1377 # NCBI annotation: Tsh # Family: family:all:60 # MgeID: mge:845 # MgeName: pAPEC-O2-ColV # Cross-refs: genbank:gi:84060920;genbank:GeneID:3853553	True		False	{'GO:0006508', 'GO:0004252', 'GO:0019867', 'GO:0004175'}	{'GO:0019867'}	{'GO:0004252', 'GO:0004175'}	{'GO:0006508'}	{'MetaCyc: PWY-5301', 'MetaCyc: PWY-7091', 'MetaCyc: PWY-6855', 'MetaCyc: PWY-8036', 'MetaCyc: PWY-7161', 'MetaCyc: PWY-5729', 'KEGG: 00531', 'MetaCyc: PWY-5996', 'MetaCyc: PWY-7631', 'MetaCyc: PWY-6948', 'MetaCyc: PWY-6795', 'MetaCyc: PWY-6906', 'KEGG: 01040', 'MetaCyc: PWY-7151', 'MetaCyc: PWY-1121', 'MetaCyc: PWY-5748', 'MetaCyc: PWY-5305', 'MetaCyc: PWY-7668', 'KEGG: 00051', 'MetaCyc: PWY-804…	{'IPR036709', 'IPR012332', 'IPR005546', 'IPR030396', 'IPR011050', 'IPR006315', 'IPR000710'}	WP_061092950.1 autotransporter outer membrane beta-barrel domain-containing protein [Escherichia coli]		2088
562.22809.con.0017_39|562.22809			Cluster 11977	9.0	False	False				False	protein:proph:179307 Length: 306 # NCBI annotation: hypothetical protein # Family: family:all:25 # ACLAME annotation(s): phi:0000026 - phage DNA replication # MgeID: mge:2597 # MgeName: prophinder:44809 # Cross-refs: genbank:acc:YP_001177335;interpro:IPR011741;genbank:gi:146312261;genbank:GeneID:5113784	True		False						{'IPR011741'}	WP_069891586.1 transcriptional regulator [Escherichia coli]		2090
562.22809.con.0017_41|562.22809			Cluster 23679	11.0	False	False				False	protein:proph:179309 Length: 156 # NCBI annotation: hypothetical protein # Family: family:all:461 # MgeID: mge:2597 # MgeName: prophinder:44809 # Cross-refs: genbank:acc:YP_001177337;genbank:gi:146312263;genbank:GeneID:5113786	True		False							WP_042063981.1 hypothetical protein [Escherichia coli]	True	2091
562.22809.con.0017_8|562.22809			Cluster 22494	7.0	False	False				False	protein:vir:1893 Length: 166 # NCBI annotation: major tail subunit # Family: family:all:778 # MgeID: mge:41 # MgeName: HK022 # Cross-refs: genbank:acc:NP_037673;genbank:gi:9634131;genbank:GeneID:1262518	True		False						{'IPR032495'}	WP_048231627.1 MULTISPECIES: phage major tail protein [Enterobacteriaceae]		2089
562.22810.con.0016_9|562.22810			Cluster 323	7.0	False	False				False	protein:plasmid:158886 Length: 1274 # NCBI annotation: hypothetical protein # Family: family:all:20965 # MgeID: mge:738 # MgeName: pU302L # Cross-refs: genbank:gi:58383290;genbank:GeneID:3259891	True		False					{'Reactome: R-HSA-8856828', 'Reactome: R-DME-2179392', 'MetaCyc: PWY-6027', 'Reactome: R-GGA-68689', 'Reactome: R-RNO-5696400', 'Reactome: R-BTA-73817', 'Reactome: R-MMU-381042', 'Reactome: R-GGA-2871796', 'Reactome: R-HSA-5693565', 'Reactome: R-DME-5610780', 'Reactome: R-DDI-5358565', 'Reactome: R-HSA-9684325', 'MetaCyc: PWY-3841', 'Reactome: R-HSA-1660514', 'MetaCyc: PWY-6659', 'Reactome: R-HSA…	{'IPR027417'}	WP_021293345.1 hypothetical protein [Escherichia coli]	True	2092
562.22811.con.0103_1|562.22811			Cluster 38291	325.0	False	False				False		False		False							WP_031942424.1 MULTISPECIES: hypothetical protein [Enterobacteriaceae]	True	2093
562.22817.con.0001_332|562.22817			Cluster 25835	2921.0	True	False				False		False		False	{'GO:0003677'}		{'GO:0003677'}		{'MetaCyc: PWY-6147', 'KEGG: 00910', 'Reactome: R-MMU-111465', 'KEGG: 00250', 'MetaCyc: PWY-8067', 'MetaCyc: PWY-7539', 'KEGG: 00270', 'MetaCyc: PWY-6749', 'MetaCyc: PWY-6502', 'Reactome: R-HSA-8940973', 'Reactome: R-HSA-6807505', 'Reactome: R-XTR-6807505', 'MetaCyc: PWY-7821', 'Reactome: R-MMU-6807505', 'Reactome: R-HSA-9018519', 'Reactome: R-HSA-210744', 'MetaCyc: PWY-8013', 'Reactome: R-HSA-18…	{'IPR015060', 'IPR010982', 'IPR027910'}	AAN80544.1 Hypothetical protein ydiL [Escherichia coli CFT073]		2094
562.22825.con.0009_101|562.22825			Cluster 903	18.0	False	False				False		False		False					{'MetaCyc: PWY-5104', 'Reactome: R-HSA-2995383', 'MetaCyc: PWY-6027', 'MetaCyc: PWY-7407', 'MetaCyc: PWY-5800', 'MetaCyc: PWY-7693', 'MetaCyc: PWY-6389', 'MetaCyc: PWY-6720', 'MetaCyc: PWY-7694', 'MetaCyc: PWY-5994', 'MetaCyc: PWY-8035', 'MetaCyc: PWY-7448', 'MetaCyc: PWY-7670', 'MetaCyc: PWY-5437', 'MetaCyc: PWY-7007', 'MetaCyc: PWY-7352', 'MetaCyc: PWY-7659', 'MetaCyc: PWY-7950', 'MetaCyc: PWY-…	{'IPR039444', 'IPR029035'}	WP_001399512.1 MULTISPECIES: SIR2-like domain protein [Enterobacteriaceae]		2095
562.22832.con.0024_20|562.22832			Cluster 10484	2922.0	True	False				False	protein:proph:178684 Length: 257 # NCBI annotation: hypothetical protein # Family: family:all:551 # MgeID: mge:2579 # MgeName: prophinder:47396 # Cross-refs: genbank:acc:YP_001609394;genbank:gi:163868186;genbank:GeneID:5830407	True		False					{'MetaCyc: PWY-6032', 'MetaCyc: PWY-6314', 'MetaCyc: PWY-8075', 'MetaCyc: PWY-7702', 'MetaCyc: PWY-6027', 'Reactome: R-HSA-3371497', 'MetaCyc: PWY-7050', 'MetaCyc: PWY-8084', 'Reactome: R-XTR-3371497', 'MetaCyc: PWY-5789', 'MetaCyc: PWY-8036', 'MetaCyc: PWY-7407', 'KEGG: 00540', 'MetaCyc: PWY-5903', 'Reactome: R-MMU-6811436', 'MetaCyc: PWY-8166', 'MetaCyc: PWY-6948', 'MetaCyc: PWY-7693', 'MetaCyc…	{'IPR040831', 'IPR011004'}	WP_001234086.1 LbetaH domain-containing protein [Escherichia coli]		2096
562.22834.con.0001_52|562.22834			Cluster 21501	9.0	False	False				False		False		False							WP_001196760.1 hypothetical protein [Escherichia coli]	True	2097
562.22834.con.0001_53|562.22834			Cluster 38864	9.0	False	False				False		False		False							ACB16980.1 hypothetical protein EcSMS35_3515 [Escherichia coli SMS-3-5]	True	2098
562.22834.con.0001_54|562.22834	COG3864	S	Cluster 7682	9.0	False	False				False		False		False					{'Reactome: R-RNO-210991', 'Reactome: R-BTA-69017', 'Reactome: R-RNO-372708', 'Reactome: R-HSA-6796648', 'Reactome: R-DDI-6798695', 'Reactome: R-RNO-5696400', 'Reactome: R-DME-195253', 'Reactome: R-HSA-186797', 'Reactome: R-HSA-5210891', 'Reactome: R-HSA-5693565', 'Reactome: R-DME-5610780', 'Reactome: R-DDI-76042', 'MetaCyc: PWY-5800', 'Reactome: R-HSA-2022090', 'Reactome: R-MMU-2022090', 'Reacto…	{'IPR036465', 'IPR002035', 'IPR008912'}	WP_000097506.1 VWA domain-containing protein [Escherichia coli]		2099
562.22834.con.0001_55|562.22834			Cluster 1620	9.0	False	False				False		False		False						{'IPR043737'}	WP_096986731.1 hypothetical protein [Escherichia coli]	True	2100
562.22834.con.0001_56|562.22834	COG0714	R	Cluster 8831	9.0	False	False				False		False		False	{'GO:0005524', 'GO:0016887'}		{'GO:0005524', 'GO:0016887'}		{'Reactome: R-HSA-8856828', 'Reactome: R-DME-2179392', 'MetaCyc: PWY-6027', 'Reactome: R-GGA-68689', 'Reactome: R-RNO-5696400', 'Reactome: R-BTA-73817', 'Reactome: R-MMU-381042', 'Reactome: R-GGA-2871796', 'Reactome: R-HSA-5693565', 'Reactome: R-DME-5610780', 'Reactome: R-DDI-5358565', 'Reactome: R-HSA-9684325', 'MetaCyc: PWY-3841', 'Reactome: R-HSA-1660514', 'MetaCyc: PWY-6659', 'Reactome: R-HSA…	{'IPR027417', 'IPR011704'}	WP_000204707.1 ATPase [Escherichia coli]		2101
562.22834.con.0001_57|562.22834			Cluster 3645	9.0	False	False				False		False		False					{'Reactome: R-HSA-8856828', 'Reactome: R-DDI-389357', 'Reactome: R-GGA-2470946', 'Reactome: R-HSA-2995383', 'Reactome: R-MMU-983695', 'Reactome: R-HSA-1660514', 'Reactome: R-HSA-5693565', 'Reactome: R-DME-5610780', 'Reactome: R-HSA-5620916', 'Reactome: R-MMU-2468052', 'Reactome: R-MMU-9027276', 'Reactome: R-DDI-174178', 'Reactome: R-MMU-9018681', 'Reactome: R-HSA-2424491', 'Reactome: R-GGA-432722…	{'IPR043746', 'IPR016024'}	WP_001007101.1 hypothetical protein [Escherichia coli]	True	2102
562.22834.con.0001_58|562.22834			Cluster 5705	9.0	False	False				False		False		False	{'GO:0008270'}		{'GO:0008270'}		{'MetaCyc: PWY-5188', 'KEGG: 01120', 'Reactome: R-RNO-166058', 'Reactome: R-HSA-166058', 'Reactome: R-HSA-975138', 'Reactome: R-MMU-975138', 'Reactome: R-MMU-2871796', 'KEGG: 04151', 'MetaCyc: PWY-7511', 'Reactome: R-MMU-166058', 'Reactome: R-HSA-9010553', 'Reactome: R-HSA-933542', 'KEGG: 05170', 'KEGG: 05165', 'KEGG: 04714', 'Reactome: R-RNO-975871', 'KEGG: 04926', 'KEGG: 00860', 'Reactome: R-RN…	{'IPR007527'}	WP_096986732.1 SWIM zinc finger family protein [Escherichia coli]		2103
562.22834.con.0004_60|562.22834	COG0801	H	Cluster 21795	2931.0	True	False				False		False		False	{'GO:0003848', 'GO:0009396'}		{'GO:0003848'}	{'GO:0009396'}	{'MetaCyc: PWY-6148', 'MetaCyc: PWY-6147', 'MetaCyc: PWY-6703', 'MetaCyc: PWY-6614', 'KEGG: 00790', 'MetaCyc: PWY-7539', 'MetaCyc: PWY-7852', 'KEGG: 01100', 'MetaCyc: PWY-6797', 'MetaCyc: PWY-7853', 'MetaCyc: PWY-7442', 'MetaCyc: PWY-6983', 'MetaCyc: PWY-5663'}	{'IPR035907', 'IPR000550'}	WP_096986647.1 2-amino-4-hydroxy-6-hydroxymethyldihydropteridine diphosphokinase [Escherichia coli]		2104
562.22834.con.0023_59|562.22834			Cluster 39821	47.0	False	False				False		False		False									2105
562.22834.con.0068_4|562.22834			Cluster 30256	56.0	False	False				False	protein:plasmid:16962 Length: 98 # NCBI annotation: CcgD protein # Family: family:all:9664 # MgeID: mge:409 # MgeName: R46 # Cross-refs: genbank:acc:NP_511212;genbank:gi:17530614;genbank:GeneID:1263144	True		False							WP_033547315.1 MULTISPECIES: hypothetical protein [Enterobacteriaceae]	True	2106
562.22837.con.0105_2|562.22837	COG4845	V	Cluster 18162	17.0	False	True	catII from Escherichia coli K-12	3004656.0	{Chlor_Acetyltrans_CAT}	True	protein:plasmid:117799 Length: 213 # NCBI annotation: chloramphenicol acetyl transferase II # Family: family:all:685 # MgeID: mge:946 # MgeName: pSC138 # Cross-refs: genbank:gi:60115525;genbank:GeneID:3283446	True		False	{'GO:0008811'}		{'GO:0008811'}		{'MetaCyc: PWY-5301', 'Reactome: R-HSA-70895', 'MetaCyc: PWY-6027', 'MetaCyc: PWY-7161', 'MetaCyc: PWY-7407', 'Reactome: R-HSA-1222541', 'MetaCyc: PWY-7693', 'MetaCyc: PWY-7605', 'Reactome: R-DDI-71403', 'MetaCyc: PWY-6720', 'MetaCyc: PWY-7694', 'MetaCyc: PWY-5994', 'MetaCyc: PWY-8035', 'KEGG: 00472', 'MetaCyc: PWY-8100', 'Reactome: R-SCE-71403', 'MetaCyc: PWY-7448', 'MetaCyc: PWY-7150', 'Reactom…	{'IPR023213', 'IPR018372', 'IPR001707'}	WP_001011939.1 MULTISPECIES: type A-2 chloramphenicol O-acetyltransferase CatII [Gammaproteobacteria]		2107
562.22838.con.0023_73|562.22838	COG2814	G	Cluster 6745	2930.0	True	True	mdtG	3001329.0	{Chlor_Efflux_Pump, emrB, MFS_efflux, norA, TetA, TetA-B, TetA-G, TetD, TetE, TetH-TetJ, tet_MFS_efflux, TetY}	True	protein:plasmid:14364 Length: 399 # NCBI annotation: Permease MDR-related # Family: family:all:10 # MgeID: mge:292 # MgeName: pSOL1 # Cross-refs: genbank:acc:NP_149193;genbank:gi:15004733;genbank:GeneID:1116034	True		False	{'GO:0005886', 'GO:0055085', 'GO:0022857'}	{'GO:0005886'}	{'GO:0022857'}	{'GO:0055085'}	{'Reactome: R-RNO-210991', 'Reactome: R-MMU-159418', 'Reactome: R-HSA-8856828', 'Reactome: R-XTR-352230', 'Reactome: R-MMU-5653890', 'Reactome: R-RNO-196757', 'MetaCyc: PWY-6369', 'Reactome: R-HSA-352230', 'Reactome: R-MMU-196819', 'Reactome: R-HSA-442660', 'Reactome: R-HSA-5662702', 'Reactome: R-DME-422356', 'Reactome: R-DME-196836', 'Reactome: R-CEL-428643', 'Reactome: R-HSA-5619070', 'Reactome…	{'IPR036259', 'IPR020846', 'IPR023692', 'IPR001958', 'IPR011701'}	WP_000074171.1 MULTISPECIES: multidrug resistance protein MdtG [Escherichia]		2108
562.22840.con.0074_3|562.22840			Cluster 22496	348.0	False	False				False	protein:plasmid:24543 Length: 165 # NCBI annotation: hypothetical protein # Family: family:all:2318 # MgeID: mge:593 # MgeName: R27 # Cross-refs: genbank:acc:NP_058292;genbank:gi:10957268;genbank:GeneID:875202	True		False							WP_000499610.1 MULTISPECIES: amino acid-binding protein [Gammaproteobacteria]		2109
562.22842.con.0002_258|562.22842	COG0617	J	Cluster 5208	2931.0	True	False				False	protein:vir:99053 Length: 401 # NCBI annotation: gp8 # Family: family:all:11436 # MgeID: mge:1671 # MgeName: Wildcat # Cross-refs: genbank:acc:YP_655873;genbank:gi:109521445;genbank:GeneID:4158018	True		False	{'GO:0003723', 'GO:0016779', 'GO:0004652', 'GO:0006396', 'GO:0006378'}		{'GO:0004652', 'GO:0003723', 'GO:0016779'}	{'GO:0006378', 'GO:0006396'}	{'Reactome: R-RNO-5693571', 'MetaCyc: PWY-8176', 'Reactome: R-RNO-5689880', 'KEGG: 00230', 'MetaCyc: PWY-7878', 'Reactome: R-SPO-429947', 'Reactome: R-HSA-5649702', 'Reactome: R-DRE-110362', 'MetaCyc: PWY-6575', 'Reactome: R-MMU-72163', 'MetaCyc: PWY-6368', 'Reactome: R-DRE-110381', 'Reactome: R-HSA-110373', 'MetaCyc: PWY-6720', 'MetaCyc: PWY-8052', 'Reactome: R-HSA-909733', 'Reactome: R-MMU-8983…	{'IPR025866', 'IPR032828', 'IPR010206', 'IPR002646', 'IPR043519'}	OWE89470.1 polynucleotide adenylyltransferase [Escherichia coli]		2110
562.22842.con.0004_305|562.22842	COG1172	G	Cluster 16126	28.0	False	False				False	protein:plasmid:27581 Length: 343 # NCBI annotation: putative sugar ABC transporter permease protein # Family: family:all:23 # MgeID: mge:608 # MgeName: pSymB # Cross-refs: genbank:acc:NP_437132;genbank:gi:16264340;genbank:GeneID:1236923	True		False	{'GO:0016021', 'GO:0055085', 'GO:0022857'}	{'GO:0016021'}	{'GO:0022857'}	{'GO:0055085'}	{'Reactome: R-HSA-8856828', 'Reactome: R-DME-2179392', 'MetaCyc: PWY-6027', 'Reactome: R-GGA-68689', 'Reactome: R-RNO-5696400', 'Reactome: R-BTA-73817', 'Reactome: R-MMU-381042', 'Reactome: R-GGA-2871796', 'Reactome: R-HSA-5693565', 'Reactome: R-DME-5610780', 'Reactome: R-DDI-5358565', 'Reactome: R-HSA-9684325', 'MetaCyc: PWY-3841', 'Reactome: R-HSA-1660514', 'MetaCyc: PWY-6659', 'Reactome: R-HSA…	{'IPR027417', 'IPR001851'}	WP_077630914.1 ABC transporter permease [Escherichia coli]		2111
562.22847.con.0020_30|562.22847			Cluster 27635	6.0	False	False				False		False		False							SPW37655.1 formate hydrogenlyase transcriptional activator [Escherichia coli]		2112
562.22847.con.0063_3|562.22847	COG0732	V	Cluster 7047	7.0	False	False				False		False		False	{'GO:0003677', 'GO:0006304'}		{'GO:0003677'}	{'GO:0006304'}		{'IPR000055'}	WP_033554646.1 restriction endonuclease subunit S [Escherichia coli]		2113
562.22847.con.0084_2|562.22847			Cluster 38011	9.0	False	False				False	protein:vir:101329 Length: 54 # NCBI annotation: TciB # Family: family:all:5007 # MgeID: mge:1512 # MgeName: P1 # Cross-refs: genbank:acc:YP_006541;genbank:gi:46401695;genbank:GeneID:2777389	True		False						{'IPR025169'}	WP_000579539.1 MULTISPECIES: DUF3927 domain-containing protein [Enterobacteriaceae]	True	2114
562.22847.con.0089_7|562.22847			Cluster 36727	22.0	False	False				False		False		False									2115
562.22847.con.0106_1|562.22847	COG5426	S	Cluster 33289	7.0	False	False				False	protein:plasmid:19528 Length: 94 # NCBI annotation: hypothetical protein # Family: family:all:39 # MgeID: mge:516 # MgeName: F # Cross-refs: genbank:acc:NP_061401;genbank:gi:9507735;genbank:GeneID:1263518	True		False					{'MetaCyc: PWY-6027', 'MetaCyc: PWY-7091', 'Reactome: R-DDI-6798695', 'Reactome: R-HSA-73817', 'MetaCyc: PWY-7407', 'MetaCyc: PWY-5800', 'Reactome: R-DRE-499943', 'MetaCyc: PWY-7693', 'MetaCyc: PWY-6906', 'Reactome: R-DME-9646399', 'MetaCyc: PWY-7052', 'MetaCyc: PWY-6720', 'Reactome: R-HSA-499943', 'MetaCyc: PWY-7694', 'MetaCyc: PWY-5994', 'MetaCyc: PWY-7057', 'MetaCyc: PWY-8035', 'KEGG: 00600', …	{'IPR010768', 'IPR029062'}	EQP39540.1 hypothetical protein G733_01958 [Escherichia coli HVH 65 (4-2262045)]	True	2116
562.22847.con.0118_1|562.22847			Cluster 31052	5.0	False	False				False		False		False	{'GO:0006355'}			{'GO:0006355'}	{'MetaCyc: PWY-5737', 'KEGG: 00330', 'MetaCyc: PWY-6922', 'MetaCyc: PWY-6853', 'KEGG: 00250', 'KEGG: 01100', 'KEGG: 01110'}	{'IPR013321', 'IPR007337'}	WP_023237786.1 MULTISPECIES: hypothetical protein [Enterobacteriaceae]	True	2117
562.22847.con.0118_2|562.22847			Cluster 26342	5.0	False	False				False	protein:plasmid:19277 Length: 136 # NCBI annotation: hypothetical protein # Family: family:all:21543 # MgeID: mge:502 # MgeName: pUCD5000 # Cross-refs: genbank:acc:NP_046810;genbank:gi:10957021;genbank:GeneID:4267931	True		False							WP_000896281.1 MULTISPECIES: hypothetical protein [Enterobacteriaceae]	True	2118
562.22847.con.0118_3|562.22847			Cluster 32273	5.0	False	False				False		False		False						{'IPR035093', 'IPR007712'}	WP_023237785.1 MULTISPECIES: type II toxin-antitoxin system RelE/ParE family toxin [Enterobacteriaceae]		2119
562.22847.con.0118_4|562.22847			Cluster 25600	4.0	False	False				False	protein:plasmid:109675 Length: 147 # NCBI annotation: hypothetical protein # Family: family:all:1951 # MgeID: mge:842 # MgeName: p9123 # Cross-refs: genbank:gi:41056926;genbank:GeneID:2847480	True		False							AGM37763.2 DNA replication protein (plasmid) [Cronobacter sakazakii]		2120
562.22854.con.0084_1|562.22854	COG4644	L	Cluster 629	614.0	False	False				False	protein:plasmid:19638 Length: 988 # NCBI annotation: transposase # Family: family:all:24 # MgeID: mge:518 # MgeName: R100 # Cross-refs: genbank:acc:NP_052901;genbank:gi:9507570;genbank:GeneID:1263441	True		False	{'GO:0004803', 'GO:0006313'}		{'GO:0004803'}	{'GO:0006313'}		{'IPR025296', 'IPR002513'}	SXR49677.1 transposase TnpA, Tn21 [Klebsiella pneumoniae]		2121
562.22860.con.0039_1|562.22860	COG0796	M	Cluster 13106	2925.0	True	False				False	protein:plasmid:15814 Length: 273 # NCBI annotation: hypothetical protein # Family: family:all:20750 # MgeID: mge:365 # MgeName: pB171 # Cross-refs: genbank:acc:NP_053125;genbank:gi:10955413;genbank:GeneID:1238663	True		False	{'GO:0009252', 'GO:0016855', 'GO:0008881', 'GO:0006807', 'GO:0036361'}		{'GO:0008881', 'GO:0016855', 'GO:0036361'}	{'GO:0009252', 'GO:0006807'}	{'MetaCyc: PWY-6387', 'KEGG: 00472', 'KEGG: 00250', 'KEGG: 00260', 'KEGG: 00471', 'KEGG: 01100', 'MetaCyc: PWY-6386', 'KEGG: 00270'}	{'IPR015942', 'IPR001920', 'IPR033134', 'IPR018187', 'IPR004391'}	WP_072170841.1 glutamate racemase [Escherichia coli]		2122
562.22862.con.0045_1|562.22862			Cluster 16605	597.0	False	False				False		False		False					{'Reactome: R-HSA-8856828', 'Reactome: R-DDI-389357', 'Reactome: R-DME-2179392', 'Reactome: R-HSA-2995383', 'MetaCyc: PWY-6027', 'Reactome: R-MMU-983695', 'Reactome: R-HSA-5210891', 'Reactome: R-GGA-2871796', 'Reactome: R-HSA-5693565', 'Reactome: R-HSA-1660514', 'Reactome: R-MMU-381042', 'MetaCyc: PWY-7693', 'Reactome: R-MMU-165158', 'Reactome: R-GGA-1227739', 'Reactome: R-HSA-975155', 'Reactome:…	{'IPR011009', 'IPR009330'}	WP_000615160.1 MULTISPECIES: lipopolysaccharide core heptose(II) kinase RfaY [Enterobacteriaceae]		2123
562.22862.con.0048_34|562.22862			Cluster 5247	20.0	False	False				False		False		False						{'IPR014966'}	WP_001703027.1 FRG domain-containing protein [Escherichia coli]		2124
562.22862.con.0048_35|562.22862			Cluster 9499	19.0	False	False				False		False		False							CCP98234.1 hypothetical protein ECK5_45300 [Escherichia coli O10:K5(L):H4 str. ATCC 23506]	True	2125
562.22862.con.0048_36|562.22862			Cluster 14140	19.0	False	False				False		False		False						{'IPR041519'}	WP_021572745.1 hypothetical protein [Escherichia coli]	True	2126
562.22865.con.0004_43|562.22865			Cluster 24646	6.0	False	False				False	protein:proph:176898 Length: 176 # NCBI annotation: hypothetical protein # Family: family:all:67 # MgeID: mge:2522 # MgeName: prophinder:43598 # Cross-refs: genbank:acc:YP_853631;genbank:gi:117624718;genbank:GeneID:4495696	True		False						{'IPR025153'}	WP_060504002.1 MULTISPECIES: ead/Ea22-like family protein [Enterobacteriaceae]		2127
562.22865.con.0066_1|562.22865	COG4974	L	Cluster 11000	11.0	False	False				False	protein:proph:171638 Length: 318 # NCBI annotation: integrase # Family: family:all:2 # MgeID: mge:2381 # MgeName: prophinder:42645 # Cross-refs: genbank:acc:YP_001445195;interpro:IPR002104;interpro:IPR010998;interpro:IPR011010;interpro:IPR011946;interpro:IPR013762;genbank:gi:156974288;genbank:GeneID:5552915	True		False	{'GO:0015074', 'GO:0003677', 'GO:0006310'}		{'GO:0003677'}	{'GO:0015074', 'GO:0006310'}	{'MetaCyc: PWY-8179', 'MetaCyc: PWY-8117', 'MetaCyc: PWY-6749', 'Reactome: R-SPO-4615885', 'MetaCyc: PWY-7735', 'MetaCyc: PWY-7127', 'Reactome: R-CEL-4615885', 'Reactome: R-HSA-4615885', 'Reactome: R-DDI-4615885', 'MetaCyc: PWY-6626', 'Reactome: R-MMU-4615885', 'Reactome: R-RNO-4615885', 'MetaCyc: PWY-7419', 'MetaCyc: PWY-7904', 'Reactome: R-SCE-4615885', 'MetaCyc: PWY-6955', 'MetaCyc: PWY-7888',…	{'IPR013762', 'IPR010998', 'IPR002104', 'IPR044068', 'IPR011946', 'IPR004107', 'IPR011010'}	WP_032482493.1 MULTISPECIES: integron integrase [Gammaproteobacteria]		2128
562.22865.con.0066_2|562.22865			Cluster 39135	10.0	False	False				False		False		False							CNO71701.1 Uncharacterised protein [Salmonella enterica subsp. enterica serovar Typhimurium str. DT104]	True	2129
562.22865.con.0066_6|562.22865			Cluster 35091	10.0	False	False				False		False		False							WP_032482494.1 MULTISPECIES: hypothetical protein [Gammaproteobacteria]	True	2130
562.22865.con.0066_7|562.22865			Cluster 36196	10.0	False	False				False		False		False					{'KEGG: 01120', 'MetaCyc: PWY-7128', 'KEGG: 00760', 'MetaCyc: PWY-6993', 'KEGG: 01100'}	{'IPR024467'}	WP_032482496.1 MULTISPECIES: DUF2384 domain-containing protein [Gammaproteobacteria]	True	2131
562.22865.con.0066_8|562.22865			Cluster 25837	10.0	False	False				False		False		False							WP_034167712.1 MULTISPECIES: hypothetical protein [Enterobacteriaceae]	True	2132
562.22865.con.0066_9|562.22865			Cluster 38296	5.0	False	False				False		False		False							OYF29058.1 hypothetical protein CI782_25690, partial [Shigella sonnei]	True	2133
562.22865.con.0067_1|562.22865			Cluster 29042	39.0	False	False				False		False		False							OAC09698.1 hypothetical protein RIKO2305_75c00010 [Escherichia coli]	True	2134
562.22865.con.0076_1|562.22865	COG3688	S	Cluster 2452	17.0	False	True	tetM	3000186.0	{TetM-TetW-TetO-TetS, tet_ribosomoal_protect}	True	protein:plasmid:17138 Length: 639 # NCBI annotation: tetracycline resistance protein TetM # Family: family:all:554 # MgeID: mge:431 # MgeName: pMD5057 # Cross-refs: genbank:acc:NP_862291;genbank:gi:32455514;genbank:GeneID:1450350	True		False	{'GO:0005525', 'GO:0003924'}		{'GO:0005525', 'GO:0003924'}		{'Reactome: R-HSA-8856828', 'Reactome: R-DME-2179392', 'MetaCyc: PWY-6027', 'Reactome: R-GGA-68689', 'Reactome: R-RNO-5696400', 'Reactome: R-BTA-73817', 'Reactome: R-MMU-381042', 'Reactome: R-GGA-2871796', 'Reactome: R-HSA-5693565', 'Reactome: R-DME-5610780', 'Reactome: R-HSA-9684325', 'Reactome: R-DDI-5358565', 'MetaCyc: PWY-3841', 'Reactome: R-HSA-1660514', 'MetaCyc: PWY-6659', 'Reactome: R-HSA…	{'IPR005517', 'IPR031157', 'IPR005225', 'IPR020568', 'IPR000640', 'IPR035647', 'IPR014721', 'IPR027417', 'IPR000795', 'IPR041095', 'IPR035650', 'IPR009000'}	WP_025989258.1 MULTISPECIES: tetracycline resistance ribosomal protection protein Tet(M) [Gammaproteobacteria]		2135
562.22865.con.0076_2|562.22865			Cluster 21718	14.0	False	False				False	protein:plasmid:133215 Length: 310 # NCBI annotation: hypothetical protein # Family: family:all:4141 # MgeID: mge:740 # MgeName: Tn916 # Cross-refs: genbank:gi:54307168;genbank:GeneID:3119695	True		False						{'IPR035628', 'IPR024735'}	ALJ52331.1 hypothetical protein (plasmid) [Escherichia coli]	True	2136
562.22868.con.0002_314|562.22868	COG0246	G	Cluster 2550	2902.0	True	False				False		False		False	{'GO:0016491', 'GO:0055114'}		{'GO:0016491'}	{'GO:0055114'}	{'MetaCyc: PWY-6027', 'MetaCyc: PWY-6664', 'MetaCyc: PWY-7862', 'MetaCyc: PWY-3841', 'MetaCyc: PWY-6659', 'MetaCyc: PWY-7693', 'Reactome: R-HSA-77111', 'MetaCyc: PWY-7605', 'Reactome: R-DDI-70171', 'MetaCyc: PWY-6654', 'MetaCyc: PWY-6160', 'MetaCyc: PWY-7341', 'MetaCyc: PWY-5994', 'MetaCyc: PWY-7057', 'MetaCyc: PWY-8035', 'KEGG: 00472', 'Reactome: R-RNO-77305', 'MetaCyc: PWY-8034', 'MetaCyc: PWY-…	{'IPR008927', 'IPR013118', 'IPR021134', 'IPR013328', 'IPR013131', 'IPR036291'}	WP_032283236.1 tagaturonate reductase [Escherichia coli]		2137
562.22870.con.0001_260|562.22870	COG0693	R	Cluster 18997	2931.0	True	False				False		False		False					{'MetaCyc: PWY-6027', 'MetaCyc: PWY-7091', 'Reactome: R-DDI-6798695', 'Reactome: R-HSA-73817', 'MetaCyc: PWY-7407', 'MetaCyc: PWY-5800', 'Reactome: R-DRE-499943', 'MetaCyc: PWY-7693', 'MetaCyc: PWY-6906', 'Reactome: R-DME-9646399', 'MetaCyc: PWY-7052', 'MetaCyc: PWY-6720', 'Reactome: R-HSA-499943', 'MetaCyc: PWY-7694', 'MetaCyc: PWY-5994', 'MetaCyc: PWY-7057', 'MetaCyc: PWY-8035', 'KEGG: 00600', …	{'IPR006287', 'IPR002818', 'IPR029062'}	WP_021560768.1 protein deglycase YajL [Escherichia coli]		2138
562.22870.con.0002_87|562.22870	COG5301	S	Cluster 7096	398.0	False	False				False	protein:proph:163882 Length: 382 # NCBI annotation: hypothetical protein # Family: family:all:13 # MgeID: mge:2158 # MgeName: prophinder:44205 # Cross-refs: genbank:acc:YP_001463282;genbank:gi:157158614;genbank:GeneID:5588034	True		False						{'IPR022225'}	WP_021560840.1 hypothetical protein [Escherichia coli]	True	2139
562.22871.con.0035_22|562.22871			Cluster 30109	395.0	False	False				False	protein:plasmid:121458 Length: 141 # NCBI annotation: Transposase OrfA, ISEc8 # Family: family:all:33 # MgeID: mge:819 # MgeName: pO113 # Cross-refs: genbank:gi:73853328;genbank:GeneID:3654485	True		False	{'GO:0004803', 'GO:0006313', 'GO:0003677'}		{'GO:0004803', 'GO:0003677'}	{'GO:0006313'}	{'Reactome: R-CEL-3214842', 'MetaCyc: PWY-6027', 'Reactome: R-HSA-156711', 'Reactome: R-HSA-5693565', 'MetaCyc: PWY-7407', 'Reactome: R-MMU-72163', 'Reactome: R-MMU-350054', 'Reactome: R-XTR-174417', 'MetaCyc: PWY-7693', 'Reactome: R-MMU-174417', 'Reactome: R-HSA-1839117', 'Reactome: R-HSA-6785807', 'MetaCyc: PWY-7694', 'MetaCyc: PWY-5994', 'MetaCyc: PWY-2723', 'MetaCyc: PWY-8035', 'Reactome: R-R…	{'IPR009057', 'IPR002514'}	CAV01995.1 putative transposase ORF1, IS3 family (fragment) [Escherichia coli 55989]		2140
562.22871.con.0085_1|562.22871			Cluster 37571	20.0	False	False				False		False		False							EFU53422.1 hypothetical protein HMPREF9544_01467, partial [Escherichia coli MS 153-1]	True	2141
562.22874.con.0007_44|562.22874	COG3895	R	Cluster 27279	2926.0	True	False				False		False		False						{'IPR018660', 'IPR036328'}	STE85997.1 putative lipoprotein [Escherichia coli]		2142
562.22875.con.0014_40|562.22875	COG1261	N	Cluster 17350	2929.0	True	False				False		False		False	{'GO:0044780'}			{'GO:0044780'}	{'KEGG: 00040', 'MetaCyc: PWY-6143', 'MetaCyc: PWY-6139', 'MetaCyc: PWY-6138', 'MetaCyc: PWY-6642', 'KEGG: 00053', 'Reactome: R-HSA-4085001', 'Reactome: R-DME-4085001', 'KEGG: 00270', 'KEGG: 01100', 'MetaCyc: PWY-6497', 'KEGG: 00520', 'MetaCyc: PWY-6749', 'MetaCyc: PWY-7131', 'KEGG: 00541', 'Reactome: R-MMU-4085001', 'MetaCyc: PWY-6616'}	{'IPR013974', 'IPR017585', 'IPR039246'}	STI86702.1 flagella basal body P-ring formation protein FlgA [Escherichia coli]		2143
562.22875.con.0059_2|562.22875	COG3539	NU	Cluster 20586	2830.0	False	False				False	protein:plasmid:19528 Length: 94 # NCBI annotation: hypothetical protein # Family: family:all:39 # MgeID: mge:516 # MgeName: F # Cross-refs: genbank:acc:NP_061401;genbank:gi:9507735;genbank:GeneID:1263518	True		False	{'GO:0007155', 'GO:0009289'}	{'GO:0009289'}		{'GO:0007155'}		{'IPR008966', 'IPR036937'}	EQZ39047.1 fimbrial-like adhesin protein [Escherichia coli UMEA 3592-1]		2144
562.22876.con.0024_65|562.22876	COG3831	S	Cluster 2058	33.0	False	False				False		False		False					{'Reactome: R-RNO-5696394', 'MetaCyc: PWY-7450', 'Reactome: R-HSA-2173795', 'Reactome: R-DME-5696395', 'Reactome: R-RNO-5696400', 'Reactome: R-HSA-3108214', 'Reactome: R-HSA-5696395', 'MetaCyc: PWY-5800', 'Reactome: R-HSA-5685939', 'Reactome: R-RNO-5696395', 'Reactome: R-HSA-5696400', 'MetaCyc: PWY-7981', 'Reactome: R-MMU-5696395', 'Reactome: R-DME-110362', 'Reactome: R-DME-5696394', 'Reactome: R…	{'IPR036930', 'IPR008893'}	WP_123677422.1 DUF4132 domain-containing protein [Escherichia coli]	True	2145
562.22879.con.0001_1|562.22879	COG2197	T	Cluster 15581	2924.0	True	False			{adeR, baeR, vanR}	True	protein:plasmid:114767 Length: 223 # NCBI annotation: Two Component Transcriptional Regulator, LuxR family # Family: family:all:5 # MgeID: mge:719 # MgeName: A # Cross-refs: genbank:gi:75812491;interpro:IPR000792;interpro:IPR001789;genbank:GeneID:3677755	True		False	{'GO:0006355', 'GO:0003677', 'GO:0000160'}		{'GO:0003677'}	{'GO:0006355', 'GO:0000160'}	{'Reactome: R-SPO-3371568', 'MetaCyc: PWY-5491', 'MetaCyc: PWY-46', 'KEGG: 00230', 'MetaCyc: PWY-6686', 'MetaCyc: PWY-7878', 'MetaCyc: PWY-8176', 'MetaCyc: PWY-6456', 'KEGG: 00330', 'MetaCyc: PWY-7881', 'MetaCyc: PWY-7863', 'MetaCyc: PWY-6575', 'MetaCyc: PWY-6689', 'MetaCyc: PWY-6368', 'MetaCyc: PWY-6366', 'MetaCyc: PWY-7366', 'MetaCyc: PWY-7119', 'MetaCyc: PWY-6352', 'Reactome: R-DDI-418555', 'R…	{'IPR001789', 'IPR011006', 'IPR016032', 'IPR000792'}	EMD11524.1 response regulator, partial [Escherichia coli SEPT362]		2146
562.22885.con.0041_1|562.22885			Cluster 37572	20.0	False	False				False		False		False							SMB26602.1 hypothetical protein ECWI1_1755 [Escherichia coli]	True	2147
562.22886.con.0015_73|562.22886			Cluster 27869	95.0	False	False				False		False		False						{'IPR038472', 'IPR014969'}	WP_001577625.1 DNA sulfur modification protein DndE [Escherichia coli]		2148
562.22886.con.0017_99|562.22886			Cluster 30421	2918.0	True	False				False	protein:plasmid:116219 Length: 50 # NCBI annotation: hypothetical protein # Family: family:all:409 # MgeID: mge:1903 # MgeName: 5 # Cross-refs: genbank:gi:145301527;genbank:GeneID:4999217	True		False	{'GO:0016020'}	{'GO:0016020'}				{'IPR000021', 'IPR018084'}	WP_074151665.1 type I toxin-antitoxin system Hok family toxin [Escherichia coli]		2149
562.22886.con.0043_17|562.22886			Cluster 24294	65.0	False	False				False		False		False							WP_001577936.1 hypothetical protein [Escherichia coli]	True	2150
562.22895.con.0040_33|562.22895			Cluster 25389	21.0	False	False				False		False		False	{'GO:0003677'}		{'GO:0003677'}		{'MetaCyc: PWY-6147', 'KEGG: 00910', 'Reactome: R-MMU-111465', 'KEGG: 00250', 'MetaCyc: PWY-8067', 'MetaCyc: PWY-7539', 'KEGG: 00270', 'MetaCyc: PWY-6749', 'MetaCyc: PWY-6502', 'Reactome: R-HSA-8940973', 'Reactome: R-HSA-6807505', 'Reactome: R-XTR-6807505', 'MetaCyc: PWY-7821', 'Reactome: R-MMU-6807505', 'Reactome: R-HSA-9018519', 'Reactome: R-HSA-210744', 'MetaCyc: PWY-8013', 'Reactome: R-HSA-18…	{'IPR001387', 'IPR010982'}	WP_113454557.1 helix-turn-helix domain-containing protein [Escherichia coli]		2151
562.22896.con.0027_34|562.22896			Cluster 24647	17.0	False	False				False	protein:plasmid:153995 Length: 143 # NCBI annotation: hypothetical protein # Family: family:all:9594 # MgeID: mge:1030 # MgeName: R478 # Cross-refs: genbank:gi:38348101;uniprot:Q6MXB7;genbank:GeneID:2653877	True		False							WP_001251243.1 MULTISPECIES: hypothetical protein [Enterobacteriaceae]	True	2152
562.22896.con.0034_34|562.22896			Cluster 10855	22.0	False	False				False	protein:plasmid:153914 Length: 298 # NCBI annotation: hypothetical protein # Family: family:all:4742 # MgeID: mge:1030 # MgeName: R478 # Cross-refs: genbank:gi:38347988;uniprot:Q6MXN0;genbank:GeneID:2653796	True		False							ABF67814.1 conserved hypothetical protein (plasmid) [Escherichia coli APEC O1]	True	2153
562.22898.con.0001_36|562.22898	COG4469	R	Cluster 10429	21.0	False	False				False		False		False						{'IPR010330'}	WP_000659918.1 hypothetical protein [Escherichia coli]	True	2154
562.22902.con.0006_84|562.22902			Cluster 27038	2931.0	True	False				False		False		False						{'IPR003807'}	WP_021521461.1 DUF202 domain-containing protein [Escherichia coli]	True	2155
562.22904.con.0001_191|562.22904	COG0578	C	Cluster 3489	2931.0	True	False				False	protein:plasmid:148301 Length: 510 # NCBI annotation: putative glycerol-3-phohsphate dehydrogenase # Family: family:all:1352 # MgeID: mge:1130 # MgeName: pTT27 # Cross-refs: genbank:gi:55978326;genbank:GeneID:3168413	True		False	{'GO:0016491', 'GO:0009331', 'GO:0055114', 'GO:0004368', 'GO:0010181', 'GO:0006072', 'GO:0005886', 'GO:0050660', 'GO:0046174'}	{'GO:0005886', 'GO:0009331'}	{'GO:0050660', 'GO:0010181', 'GO:0016491', 'GO:0004368'}	{'GO:0006072', 'GO:0055114', 'GO:0046174'}	{'MetaCyc: PWY-8002', 'MetaCyc: PWY-5301', 'Reactome: R-HSA-70895', 'Reactome: R-CEL-3214842', 'MetaCyc: PWY-6050', 'Reactome: R-MMU-8876198', 'MetaCyc: PWY-5418', 'MetaCyc: PWY-7161', 'MetaCyc: PWY-7407', 'Reactome: R-HSA-1222541', 'MetaCyc: PWY-6659', 'MetaCyc: PWY-6200', 'MetaCyc: PWY-5818', 'MetaCyc: PWY-7693', 'MetaCyc: PWY-7605', 'Reactome: R-DDI-379397', 'MetaCyc: PWY-7015', 'MetaCyc: PWY-…	{'IPR017752', 'IPR036188', 'IPR007419', 'IPR006076', 'IPR000447', 'IPR041854'}	WP_000857226.1 anaerobic glycerol-3-phosphate dehydrogenase subunit A [Escherichia coli]		2156
562.22906.con.0002_141|562.22906			Cluster 32954	2929.0	True	False				False		False		False	{'GO:0016021'}	{'GO:0016021'}				{'IPR020155'}	WP_052979472.1 DUF2542 family protein [Shigella sonnei]	True	2157
562.22912.con.0039_2|562.22912			Cluster 28672	1251.0	False	False				False	protein:plasmid:158881 Length: 79 # NCBI annotation: hypothetical protein # Family: family:all:596 # MgeID: mge:738 # MgeName: pU302L # Cross-refs: genbank:gi:58383258;genbank:GeneID:3259886	True		False						{'IPR038612', 'IPR009253'}	WP_001604173.1 DUF905 domain-containing protein [Escherichia coli]	True	2158
562.22917.con.0024_30|562.22917			Cluster 26474	77.0	False	False				False	protein:plasmid:119776 Length: 141 # NCBI annotation: hypothetical protein # Family: family:all:2021 # MgeID: mge:774 # MgeName: pUTI89 # Cross-refs: genbank:gi:91206376;genbank:GeneID:3996498	True		False						{'IPR016386'}	WP_115740237.1 conjugal transfer protein TrbF [Escherichia coli]		2159
562.22923.con.0008_45|562.22923			Cluster 40992	9.0	False	False				False		False		False							SQR72330.1 Uncharacterised protein [Escherichia coli]	True	2160
562.22923.con.0009_148|562.22923			Cluster 38873	4.0	False	False				False		False		False							SQQ90810.1 Uncharacterised protein [Escherichia coli]	True	2161
562.22923.con.0023_22|562.22923	COG0338	L	Cluster 373	21.0	False	False				False	protein:vir:101341 Length: 754 # NCBI annotation: Dmt # Family: family:all:97 # MgeID: mge:1512 # MgeName: P1 # Cross-refs: genbank:acc:YP_006537;genbank:gi:46401691;genbank:GeneID:2777403	True		False	{'GO:0003676', 'GO:0032259', 'GO:0004519', 'GO:0032775', 'GO:0009007', 'GO:0008168', 'GO:0016539'}		{'GO:0003676', 'GO:0004519', 'GO:0009007', 'GO:0008168'}	{'GO:0016539', 'GO:0032775', 'GO:0032259'}	{'MetaCyc: PWY-5301', 'MetaCyc: PWY-6027', 'MetaCyc: PWY-7091', 'MetaCyc: PWY-8007', 'Reactome: R-BTA-71288', 'Reactome: R-DRE-71288', 'MetaCyc: PWY-7161', 'Reactome: R-HSA-9684325', 'MetaCyc: PWY-7407', 'MetaCyc: PWY-6659', 'Reactome: R-DME-5632681', 'MetaCyc: PWY-5818', 'MetaCyc: PWY-5110', 'MetaCyc: PWY-7701', 'MetaCyc: PWY-7693', 'MetaCyc: PWY-6906', 'MetaCyc: PWY-7397', 'MetaCyc: PWY-7605', …	{'IPR027434', 'IPR030934', 'IPR012327', 'IPR006142', 'IPR036844', 'IPR003586', 'IPR002052', 'IPR023095', 'IPR029063', 'IPR001525', 'IPR004042'}	WP_089589708.1 Dam family site-specific DNA-(adenine-N6)-methyltransferase [Escherichia coli]		2166
562.22923.con.0023_2|562.22923			Cluster 21892	8.0	False	False				False		False		False							WP_109538236.1 hypothetical protein [Escherichia coli]	True	2162
562.22923.con.0023_5|562.22923			Cluster 16675	16.0	False	False				False	protein:vir:101373 Length: 234 # NCBI annotation: RlfA # Family: family:all:6378 # MgeID: mge:1512 # MgeName: P1 # Cross-refs: genbank:acc:YP_006519;genbank:gi:46401673;genbank:GeneID:2777435	True		False						{'IPR024524'}	WP_001697750.1 DUF3800 domain-containing protein [Escherichia coli]	True	2163
562.22923.con.0023_6|562.22923			Cluster 23683	16.0	False	False				False	protein:vir:101412 Length: 154 # NCBI annotation: RlfB # Family: family:all:26480 # MgeID: mge:1512 # MgeName: P1 # Cross-refs: genbank:acc:YP_006520;genbank:gi:46401674;genbank:GeneID:2777476	True		False							WP_001697749.1 hypothetical protein [Escherichia coli]	True	2164
562.22923.con.0023_7|562.22923			Cluster 30571	14.0	False	False				False	protein:vir:101381 Length: 98 # NCBI annotation: PmgF # Family: family:all:26465 # MgeID: mge:1512 # MgeName: P1 # Cross-refs: genbank:acc:YP_006521;genbank:gi:46401675;genbank:GeneID:2777443	True		False							WP_024199466.1 hypothetical protein [Escherichia coli]	True	2165
562.22923.con.0028_25|562.22923			Cluster 3392	12.0	False	False				False		False		False						{'IPR011935', 'IPR025554', 'IPR037291'}	WP_023141693.1 mucoidy inhibitor MuiA family protein [Escherichia coli]		2167
562.22923.con.0029_18|562.22923			Cluster 32955	13.0	False	False				False		False		False							WP_024210554.1 hypothetical protein [Escherichia coli]	True	2168
562.22923.con.0031_11|562.22923			Cluster 7184	10.0	False	False				False		False		False						{'IPR021488'}	WP_001138658.1 DUF3142 domain-containing protein [Escherichia coli]	True	2169
562.22923.con.0031_12|562.22923			Cluster 2085	11.0	False	False				False		False		False							WP_000950830.1 hypothetical protein [Escherichia coli]	True	2170
562.22923.con.0034_13|562.22923			Cluster 15276	7.0	False	False				False		False		False					{'MetaCyc: PWY-6032', 'MetaCyc: PWY-5301', 'MetaCyc: PWY-6314', 'MetaCyc: PWY-7702', 'KEGG: 00590', 'MetaCyc: PWY-8075', 'MetaCyc: PWY-7050', 'MetaCyc: PWY-6027', 'KEGG: 00940', 'MetaCyc: PWY-8084', 'Reactome: R-BTA-6798695', 'MetaCyc: PWY-8036', 'MetaCyc: PWY-7407', 'MetaCyc: PWY-5903', 'Reactome: R-MMU-6811436', 'MetaCyc: PWY-7521', 'MetaCyc: PWY-6948', 'MetaCyc: PWY-5996', 'MetaCyc: PWY-8166',…	{'IPR036514'}	WP_001470098.1 MULTISPECIES: hypothetical protein [Enterobacteriaceae]	True	2171
562.22923.con.0034_14|562.22923	COG3203	M	Cluster 9538	7.0	False	False				False		False		False	{'GO:0015288', 'GO:0009279', 'GO:0016020', 'GO:0034220'}	{'GO:0009279', 'GO:0016020'}	{'GO:0015288'}	{'GO:0034220'}	{'Reactome: R-HSA-168179', 'Reactome: R-RNO-5689880', 'Reactome: R-HSA-1268020', 'Reactome: R-HSA-166058', 'Reactome: R-CEL-70268', 'Reactome: R-BTA-5205685', 'Reactome: R-HSA-8949215', 'Reactome: R-SSC-70268', 'Reactome: R-RNO-70268', 'Reactome: R-HSA-5205685', 'Reactome: R-DME-5689880', 'Reactome: R-CEL-5205685', 'Reactome: R-SSC-5689880', 'Reactome: R-HSA-5603041', 'Reactome: R-RNO-5205685', '…	{'IPR001897', 'IPR023614', 'IPR033900'}	WP_001470099.1 MULTISPECIES: porin [Enterobacteriaceae]		2172
562.22923.con.0034_15|562.22923	COG0015	F	Cluster 5249	7.0	False	False				False	protein:plasmid:146064 Length: 463 # NCBI annotation: fumarate lyase # Family: family:all:609 # MgeID: mge:731 # MgeName: 1 # Cross-refs: genbank:gi:94971854;genbank:GeneID:4073613	True		False	{'GO:0003824'}		{'GO:0003824'}		{'MetaCyc: PWY-6457', 'MetaCyc: PWY-6032', 'MetaCyc: PWY-6314', 'MetaCyc: PWY-7702', 'KEGG: 00230', 'MetaCyc: PWY-5', 'MetaCyc: PWY-7050', 'MetaCyc: PWY-8075', 'MetaCyc: PWY-6027', 'KEGG: 00940', 'MetaCyc: PWY-8084', 'MetaCyc: PWY-8036', 'Reactome: R-HSA-73817', 'MetaCyc: PWY-7407', 'MetaCyc: PWY-5903', 'MetaCyc: PWY-8166', 'MetaCyc: PWY-6948', 'MetaCyc: PWY-7693', 'MetaCyc: PWY-7397', 'MetaCyc: …	{'IPR008948', 'IPR020557', 'IPR019468', 'IPR024083', 'IPR022761', 'IPR000362'}	WP_072643804.1 MULTISPECIES: adenylosuccinate lyase family protein [Enterobacteriaceae]		2173
562.22923.con.0034_16|562.22923	COG1737	K	Cluster 12684	7.0	False	False				False	protein:plasmid:120213 Length: 279 # NCBI annotation: putative DNA-binding protein # Family: family:all:335 # MgeID: mge:779 # MgeName: pRL12 # Cross-refs: genbank:gi:116249094;goa:Q1M435;uniprot:Q1M435;genbank:GeneID:4398278	True		False	{'GO:0097367', 'GO:0006355', 'GO:1901135', 'GO:0003700'}		{'GO:0097367', 'GO:0003700'}	{'GO:0006355', 'GO:1901135'}	{'Reactome: R-HSA-8856828', 'MetaCyc: PWY-6027', 'Reactome: R-CEL-3214842', 'Reactome: R-RNO-5696400', 'Reactome: R-HSA-5368598', 'Reactome: R-HSA-1660514', 'Reactome: R-HSA-5693565', 'Reactome: R-DME-5610780', 'MetaCyc: PWY-7693', 'Reactome: R-DDI-174178', 'MetaCyc: PWY-6720', 'MetaCyc: PWY-5994', 'MetaCyc: PWY-2723', 'MetaCyc: PWY-8035', 'Reactome: R-GGA-418124', 'Reactome: R-XTR-110312', 'Reac…	{'IPR001347', 'IPR035472', 'IPR000281', 'IPR009057', 'IPR036388'}	WP_072643803.1 MULTISPECIES: MurR/RpiR family transcriptional regulator [Enterobacteriaceae]		2174
562.22923.con.0034_17|562.22923	COG3069	C	Cluster 5183	7.0	False	False				False		False		False	{'GO:0016021', 'GO:0015740', 'GO:0015556'}	{'GO:0016021'}	{'GO:0015556'}	{'GO:0015740'}		{'IPR018385', 'IPR004669'}	WP_001547043.1 MULTISPECIES: transporter anaerobic C4-dicarboxylate uptake C family protein [Enterobacteriaceae]		2175
562.22923.con.0034_18|562.22923	COG0281	C	Cluster 3209	7.0	False	False				False	protein:proph:163760 Length: 564 # NCBI annotation: malate dehydrogenase # Family: family:all:5398 # MgeID: mge:2154 # MgeName: prophinder:44684 # Cross-refs: genbank:acc:YP_660306;interpro:IPR001891;interpro:IPR012301;interpro:IPR012302;genbank:gi:109897051;genbank:GeneID:4172180	True		False	{'GO:0004471', 'GO:0055114', 'GO:0004470', 'GO:0051287'}		{'GO:0004471', 'GO:0004470', 'GO:0051287'}	{'GO:0055114'}	{'MetaCyc: PWY-6027', 'MetaCyc: PWY-6664', 'MetaCyc: PWY-7862', 'MetaCyc: PWY-3841', 'MetaCyc: PWY-6659', 'MetaCyc: PWY-7693', 'Reactome: R-HSA-77111', 'MetaCyc: PWY-7605', 'Reactome: R-DDI-70171', 'MetaCyc: PWY-6654', 'MetaCyc: PWY-6160', 'MetaCyc: PWY-7341', 'MetaCyc: PWY-5994', 'MetaCyc: PWY-7057', 'MetaCyc: PWY-8035', 'KEGG: 00472', 'Reactome: R-RNO-77305', 'MetaCyc: PWY-8034', 'MetaCyc: PWY-…	{'IPR015884', 'IPR037062', 'IPR012301', 'IPR001891', 'IPR036291', 'IPR012302'}	WP_001547044.1 MULTISPECIES: NAD-dependent malic enzyme [Enterobacteriaceae]		2176
562.22923.con.0037_12|562.22923			Cluster 37104	5.0	False	False				False		False		False					{'MetaCyc: PWY-6955', 'MetaCyc: PWY-7735', 'MetaCyc: PWY-7888', 'MetaCyc: PWY-7706', 'MetaCyc: PWY-7719', 'MetaCyc: PWY-7127', 'MetaCyc: PWY-7419', 'MetaCyc: PWY-7769', 'MetaCyc: PWY-8179', 'MetaCyc: PWY-8117', 'MetaCyc: PWY-7904', 'MetaCyc: PWY-7529', 'MetaCyc: PWY-6998', 'MetaCyc: PWY-6322', 'MetaCyc: PWY-6749', 'MetaCyc: PWY-7737', 'MetaCyc: PWY-6626'}	{'IPR038488'}	ESD07677.1 hypothetical protein HMPREF1595_02595 [Escherichia coli 907672]	True	2177
562.22923.con.0037_22|562.22923			Cluster 1245	7.0	False	False				False		False		False	{'GO:0005515', 'GO:0007165'}		{'GO:0005515'}	{'GO:0007165'}	{'Reactome: R-HSA-8856828', 'Reactome: R-DME-2179392', 'MetaCyc: PWY-6027', 'Reactome: R-GGA-68689', 'Reactome: R-RNO-5696400', 'Reactome: R-MMU-983695', 'Reactome: R-BTA-73817', 'Reactome: R-MMU-381042', 'Reactome: R-GGA-2871796', 'Reactome: R-HSA-5693565', 'Reactome: R-HSA-9684325', 'Reactome: R-DME-5610780', 'Reactome: R-DDI-5358565', 'MetaCyc: PWY-3841', 'Reactome: R-HSA-1660514', 'MetaCyc: P…	{'IPR011990', 'IPR035897', 'IPR000157', 'IPR013026', 'IPR027417'}	WP_059327187.1 toll/interleukin-1 receptor domain-containing protein [Escherichia coli]		2178
562.22925.con.0017_43|562.22925	COG4974	L	Cluster 7439	22.0	False	False				False	protein:plasmid:153858 Length: 386 # NCBI annotation: recombinase # Family: family:all:142 # MgeID: mge:1030 # MgeName: R478 # Cross-refs: genbank:gi:38347883;goa:Q6MXY4;interpro:IPR002104;interpro:IPR004107;uniprot:Q6MXY4;genbank:GeneID:2653740	True		False	{'GO:0015074', 'GO:0003677', 'GO:0006310'}		{'GO:0003677'}	{'GO:0015074', 'GO:0006310'}	{'MetaCyc: PWY-8179', 'MetaCyc: PWY-8117', 'MetaCyc: PWY-6749', 'Reactome: R-SPO-4615885', 'MetaCyc: PWY-7735', 'MetaCyc: PWY-7127', 'Reactome: R-CEL-4615885', 'Reactome: R-HSA-4615885', 'Reactome: R-DDI-4615885', 'MetaCyc: PWY-6626', 'Reactome: R-MMU-4615885', 'Reactome: R-RNO-4615885', 'MetaCyc: PWY-7419', 'MetaCyc: PWY-7904', 'Reactome: R-SCE-4615885', 'MetaCyc: PWY-6955', 'MetaCyc: PWY-7888',…	{'IPR002104', 'IPR010998', 'IPR011010'}	WP_061586419.1 MULTISPECIES: recombinase [Enterobacteriaceae]		2179
562.22926.con.0007_197|562.22926	COG0752	J	Cluster 12046	2931.0	True	False				False		False		False	{'GO:0004820', 'GO:0005524', 'GO:0005737', 'GO:0000166', 'GO:0006426'}	{'GO:0005737'}	{'GO:0004820', 'GO:0005524', 'GO:0000166'}	{'GO:0006426'}	{'KEGG: 00970'}	{'IPR002310', 'IPR006194'}	WP_080846929.1 glycine--tRNA ligase subunit alpha [Escherichia coli]		2180
562.22928.con.0007_120|562.22928	COG4177	E	Cluster 5928	2930.0	True	False				False	protein:plasmid:154807 Length: 319 # NCBI annotation: inner-membrane translocator # Family: family:all:23 # MgeID: mge:1804 # MgeName: 1 # Cross-refs: genbank:gi:119387518;interpro:IPR001851;genbank:GeneID:4583357	True		False	{'GO:0016021', 'GO:0015658', 'GO:0055085', 'GO:0022857'}	{'GO:0016021'}	{'GO:0015658', 'GO:0022857'}	{'GO:0055085'}		{'IPR021807', 'IPR001851', 'IPR043428'}	WP_000803795.1 branched-chain amino acid ABC transporter permease [Escherichia coli]		2181
562.22932.con.0007_48|562.22932			Cluster 1713	31.0	False	False				False	protein:vir:78371 Length: 774 # NCBI annotation: tail length tape measure-related protein # Family: family:all:4 # ACLAME annotation(s): phi:0000086 - phage tail tape measure protein # MgeID: mge:1851 # MgeName: SETP3 # Cross-refs: genbank:acc:YP_001110853;genbank:gi:134288614;genbank:GeneID:5179634	True		False						{'IPR009628'}	WP_119159550.1 hypothetical protein [Escherichia coli]	True	2182
562.22936.con.0016_57|562.22936	COG1396	K	Cluster 27172	43.0	False	False				False		False		False	{'GO:0003677'}		{'GO:0003677'}		{'MetaCyc: PWY-6147', 'KEGG: 00910', 'Reactome: R-MMU-111465', 'KEGG: 00250', 'MetaCyc: PWY-8067', 'MetaCyc: PWY-7539', 'KEGG: 00270', 'MetaCyc: PWY-6749', 'MetaCyc: PWY-6502', 'Reactome: R-HSA-8940973', 'Reactome: R-HSA-6807505', 'Reactome: R-XTR-6807505', 'MetaCyc: PWY-7821', 'Reactome: R-MMU-6807505', 'Reactome: R-HSA-9018519', 'Reactome: R-HSA-210744', 'MetaCyc: PWY-8013', 'Reactome: R-HSA-18…	{'IPR001387', 'IPR010982'}	AGP46782.1 hypothetical protein M621_03705 [Serratia plymuthica S13]	True	2183
562.22936.con.0016_61|562.22936	COG4974	L	Cluster 11790	477.0	False	False				False	protein:plasmid:18894 Length: 319 # NCBI annotation: integrase/recombinase # Family: family:all:2 # MgeID: mge:497 # MgeName: pCC7120alpha # Cross-refs: genbank:acc:NP_490309;genbank:gi:17233219;genbank:GeneID:1109244	True		False	{'GO:0015074', 'GO:0003677', 'GO:0006310'}		{'GO:0003677'}	{'GO:0015074', 'GO:0006310'}	{'MetaCyc: PWY-8179', 'MetaCyc: PWY-8117', 'MetaCyc: PWY-6749', 'Reactome: R-SPO-4615885', 'MetaCyc: PWY-7735', 'MetaCyc: PWY-7127', 'Reactome: R-CEL-4615885', 'Reactome: R-HSA-4615885', 'Reactome: R-DDI-4615885', 'MetaCyc: PWY-6626', 'Reactome: R-MMU-4615885', 'Reactome: R-RNO-4615885', 'MetaCyc: PWY-7419', 'MetaCyc: PWY-7904', 'Reactome: R-SCE-4615885', 'MetaCyc: PWY-6955', 'MetaCyc: PWY-7888',…	{'IPR013762', 'IPR002104', 'IPR011010'}	WP_042015114.1 MULTISPECIES: site-specific integrase [Enterobacteriaceae]		2184
562.22936.con.0021_57|562.22936			Cluster 15362	2929.0	True	False				False		False		False	{'GO:0005886', 'GO:0043165', 'GO:0050380'}	{'GO:0005886'}	{'GO:0050380'}	{'GO:0043165'}	{'MetaCyc: PWY-8176', 'MetaCyc: PWY-7878', 'MetaCyc: PWY-6575', 'KEGG: 00540', 'MetaCyc: PWY-6368', 'MetaCyc: PWY-5269', 'Reactome: R-MMU-191273', 'Reactome: R-HSA-2029485', 'Reactome: R-SCE-419408', 'Reactome: R-SCE-2029485', 'MetaCyc: PWY-8055', 'Reactome: R-MMU-1660661', 'Reactome: R-DME-419408', 'Reactome: R-HSA-446199', 'KEGG: 00740', 'MetaCyc: PWY-6720', 'MetaCyc: PWY-8052', 'MetaCyc: PWY-7…	{'IPR032908', 'IPR036938', 'IPR000326'}	WP_001374434.1 phosphatase PAP2 family protein [Escherichia coli]		2185
562.22936.con.0074_6|562.22936	COG3885	S	Cluster 11156	1628.0	False	False				False		False		False	{'GO:0016491', 'GO:0005506', 'GO:0055114', 'GO:0047070', 'GO:0006725', 'GO:0019439', 'GO:0008198'}		{'GO:0047070', 'GO:0016491', 'GO:0008198', 'GO:0005506'}	{'GO:0006725', 'GO:0019439', 'GO:0055114'}	{'MetaCyc: PWY-6193', 'MetaCyc: PWY-6690', 'MetaCyc: PWY-6094', 'KEGG: 01120', 'MetaCyc: PWY-6069', 'MetaCyc: PWY-6217', 'MetaCyc: PWY-6339', 'MetaCyc: PWY-7010', 'MetaCyc: PWY-5642', 'MetaCyc: PWY-7462', 'MetaCyc: PWY-6216', 'MetaCyc: PWY-6190', 'MetaCyc: PWY-6084', 'MetaCyc: PWY-7734', 'MetaCyc: PWY-8019', 'MetaCyc: PWY-5394', 'MetaCyc: PWY-181', 'MetaCyc: PWY-7009', 'MetaCyc: PWY-6089', 'MetaC…	{'IPR023789', 'IPR004183'}	WP_001568600.1 3-carboxyethylcatechol 2,3-dioxygenase [Escherichia coli]		2186
562.22936.con.0081_9|562.22936	COG2310	T	Cluster 19650	48.0	False	False				False	protein:plasmid:154084 Length: 193 # NCBI annotation: tellurium resistance protein # Family: family:all:599 # MgeID: mge:1030 # MgeName: R478 # Cross-refs: genbank:gi:38347900;interpro:IPR003325;genbank:GeneID:2653966	True		False						{'IPR003325'}	WP_042014825.1 MULTISPECIES: tellurium resistance protein TerZ [Enterobacteriaceae]		2187
562.22939.con.0089_3|562.22939			Cluster 25392	26.0	False	False				False		False		False							WP_024181414.1 MULTISPECIES: hypothetical protein [Enterobacteriaceae]	True	2188
562.22941.con.0019_10|562.22941			Cluster 24407	361.0	False	False				False		False		False							WP_072130479.1 hypothetical protein [Escherichia coli]	True	2189
562.22945.con.0003_319|562.22945			Cluster 29044	397.0	False	False				False		False		False							WP_097478863.1 hypothetical protein [Escherichia coli]	True	2190
562.22945.con.0020_21|562.22945	COG4540	R	Cluster 11919	401.0	False	False				False	protein:proph:163865 Length: 301 # NCBI annotation: phage baseplate assembly protein V # Family: family:all:123 # MgeID: mge:2158 # MgeName: prophinder:44205 # Cross-refs: genbank:acc:YP_001463286;genbank:gi:157157570;genbank:GeneID:5586194	True		False					{'MetaCyc: PWY-8119', 'MetaCyc: PWY-7543', 'MetaCyc: PWY-7612', 'MetaCyc: PWY-7056', 'MetaCyc: PWY-6737', 'MetaCyc: PWY-7702', 'MetaCyc: PWY-7091', 'MetaCyc: PWY-6855', 'MetaCyc: PWY-7571', 'MetaCyc: PWY-6379', 'MetaCyc: PWY-7650', 'MetaCyc: PWY-7134', 'MetaCyc: PWY-7445', 'MetaCyc: PWY-7569', 'MetaCyc: PWY-6527', 'MetaCyc: PWY-6749', 'MetaCyc: PWY-7577', 'MetaCyc: PWY-6289', 'MetaCyc: PWY-7735',…	{'IPR037026', 'IPR006531', 'IPR013046'}	WP_117004316.1 phage baseplate assembly protein V [Escherichia coli]		2191
562.22946.con.0037_31|562.22946	COG0741	M	Cluster 17568	1963.0	False	False				False	protein:plasmid:123224 Length: 215 # NCBI annotation: hypothetical protein # Family: family:all:126 # MgeID: mge:845 # MgeName: pAPEC-O2-ColV # Cross-refs: genbank:gi:84060785;genbank:GeneID:3853426	True		False					{'MetaCyc: PWY-6737', 'Reactome: R-SSC-5653890', 'MetaCyc: PWY-7056', 'Reactome: R-RNO-6803157', 'Reactome: R-MMU-6803157', 'MetaCyc: PWY-7450', 'MetaCyc: PWY-6385', 'MetaCyc: PWY-6855', 'MetaCyc: PWY-7091', 'Reactome: R-MMU-5653890', 'Reactome: R-BTA-6798695', 'MetaCyc: PWY-7822', 'MetaCyc: PWY-7134', 'MetaCyc: PWY-7445', 'MetaCyc: PWY-5800', 'MetaCyc: PWY-6527', 'MetaCyc: PWY-6749', 'MetaCyc: P…	{'IPR008258', 'IPR023346'}	CTT72536.1 putative transglycosylase [Escherichia coli]		2192
562.22947.con.0028_17|562.22947	COG3547	L	Cluster 9246	118.0	False	False				False	protein:plasmid:150602 Length: 347 # NCBI annotation: transposase IS116/IS110/IS902 family protein # Family: family:all:27 # MgeID: mge:1816 # MgeName: pPNAP01 # Cross-refs: genbank:gi:121582942;interpro:IPR002525;interpro:IPR003346;genbank:GeneID:4685212	True		False	{'GO:0004803', 'GO:0006313', 'GO:0003677'}		{'GO:0004803', 'GO:0003677'}	{'GO:0006313'}		{'IPR003346', 'IPR002525'}	WP_000868865.1 IS110 family transposase [Escherichia coli]		2193
562.22963.con.0110_8|562.22963	COG1455	G	Cluster 4743	2922.0	True	False				False	protein:plasmid:136569 Length: 443 # NCBI annotation: PTS system, cellobiose-specific IIC component # Family: family:all:3562 # MgeID: mge:1044 # MgeName: cp26 # Cross-refs: genbank:gi:51038601;genbank:GeneID:2942815	True		False	{'GO:0009401', 'GO:0008982', 'GO:0016021', 'GO:0016020'}	{'GO:0016021', 'GO:0016020'}	{'GO:0008982'}	{'GO:0009401'}	{'KEGG: 01120', 'MetaCyc: PWY-6369', 'MetaCyc: PWY-7975', 'MetaCyc: PWY-7077', 'KEGG: 00051', 'KEGG: 00520', 'MetaCyc: PWY-7740', 'MetaCyc: PWY-6626', 'MetaCyc: PWY-8129', 'MetaCyc: PWY-6682', 'KEGG: 00052', 'MetaCyc: PWY-7321', 'KEGG: 01100', 'MetaCyc: PWY-7948', 'KEGG: 00010', 'MetaCyc: PWY-6955', 'MetaCyc: PWY-7886', 'MetaCyc: PWY-7769', 'KEGG: 00500', 'MetaCyc: PWY-6322', 'MetaCyc: PWY-5129'}	{'IPR004501', 'IPR003352', 'IPR004796'}	WP_072749229.1 PTS N,N'-diacetylchitobiose transporter subunit IIC [Escherichia coli]		2194
562.22970.con.0005_94|562.22970	COG1309	K	Cluster 18073	1635.0	False	False				False	protein:plasmid:112228 Length: 198 # NCBI annotation: transcriptional regulator, TetR family # Family: family:all:173 # MgeID: mge:814 # MgeName: pRHL1 # Cross-refs: genbank:gi:111025850;genbank:GeneID:4225973	True		False	{'GO:0003677'}		{'GO:0003677'}		{'Reactome: R-CEL-3214842', 'MetaCyc: PWY-6027', 'Reactome: R-HSA-156711', 'Reactome: R-HSA-5693565', 'MetaCyc: PWY-7407', 'Reactome: R-MMU-72163', 'Reactome: R-MMU-350054', 'Reactome: R-XTR-174417', 'MetaCyc: PWY-7693', 'Reactome: R-MMU-174417', 'Reactome: R-HSA-1839117', 'Reactome: R-HSA-6785807', 'MetaCyc: PWY-7694', 'MetaCyc: PWY-5994', 'MetaCyc: PWY-2723', 'MetaCyc: PWY-8035', 'Reactome: R-R…	{'IPR036271', 'IPR001647', 'IPR023772', 'IPR009057'}	WP_096944164.1 TetR/AcrR family transcriptional regulator [Escherichia coli]		2195
562.22971.con.0004_115|562.22971	COG4161	E	Cluster 14460	2930.0	True	False			{ABC_efflux, macB, msbA}	True	protein:plasmid:129216 Length: 591 # NCBI annotation: probable amino acid ABC transporter, ATP-binding protein # Family: family:all:1 # MgeID: mge:1110 # MgeName: p42c # Cross-refs: genbank:gi:86360052;pfam:PF00005.11;pfam:PF00528.10;sm:SM00382;interpro:IPR000515;interpro:IPR003439;interpro:IPR003593;uniprot:Q8UAF7;genbank:GeneID:3895109	True		False	{'GO:0015424', 'GO:0005524', 'GO:0016887', 'GO:0003333'}		{'GO:0015424', 'GO:0005524', 'GO:0016887'}	{'GO:0003333'}	{'Reactome: R-HSA-8856828', 'Reactome: R-DME-2179392', 'MetaCyc: PWY-6027', 'Reactome: R-GGA-68689', 'Reactome: R-RNO-5696400', 'Reactome: R-BTA-73817', 'Reactome: R-MMU-381042', 'Reactome: R-GGA-2871796', 'Reactome: R-HSA-5693565', 'Reactome: R-DME-5610780', 'Reactome: R-DDI-5358565', 'Reactome: R-HSA-9684325', 'MetaCyc: PWY-3841', 'Reactome: R-HSA-1660514', 'MetaCyc: PWY-6659', 'Reactome: R-HSA…	{'IPR030679', 'IPR003593', 'IPR027417', 'IPR017871', 'IPR003439'}	EQN70317.1 arginine transport ATP-binding protein ArtP [Escherichia coli HVH 18 (4-8589585)]		2196
562.22971.con.0017_4|562.22971	COG0006	E	Cluster 5524	2930.0	True	False				False		False		False	{'GO:0016795'}		{'GO:0016795'}		{'KEGG: 00330', 'Reactome: R-SCE-163125', 'Reactome: R-DDI-6798695', 'Reactome: R-HSA-167200', 'KEGG: 01120', 'MetaCyc: PWY-7799', 'Reactome: R-HSA-6796648', 'Reactome: R-MMU-6804756', 'Reactome: R-SPO-674695', 'Reactome: R-SPO-6798695', 'Reactome: R-HSA-167152', 'Reactome: R-DDI-674695', 'Reactome: R-SPO-6796648', 'MetaCyc: PWY-7569', 'Reactome: R-CEL-112382', 'Reactome: R-SCE-75955', 'Reactome:…	{'IPR029149', 'IPR001131', 'IPR022846', 'IPR036005', 'IPR000994'}	WP_000444561.1 MULTISPECIES: Xaa-Pro dipeptidase [Proteobacteria]		2197
562.22971.con.0017_61|562.22971	COG0472	M	Cluster 8635	2931.0	True	False				False		False		False	{'GO:0009276', 'GO:0009103', 'GO:0030145', 'GO:0016780', 'GO:0016021', 'GO:0008963', 'GO:0000287'}	{'GO:0009276', 'GO:0016021'}	{'GO:0000287', 'GO:0030145', 'GO:0008963', 'GO:0016780'}	{'GO:0009103'}	{'MetaCyc: PWY-6471', 'Reactome: R-DDI-446193', 'MetaCyc: PWY-7905', 'MetaCyc: PWY-6470', 'Reactome: R-SPO-446193', 'MetaCyc: PWY-7530', 'MetaCyc: PWY-5265', 'MetaCyc: PWY-6397', 'MetaCyc: PWY-7819', 'MetaCyc: PWY-7290', 'Reactome: R-MMU-446193', 'MetaCyc: PWY-7815', 'Reactome: R-HSA-4549356', 'KEGG: 01100', 'Reactome: R-BTA-446193', 'KEGG: 00550', 'KEGG: 00572', 'Reactome: R-SCE-446193', 'MetaCy…	{'IPR012750', 'IPR000715'}	WP_001775058.1 UDP-N-acetylglucosamine--undecaprenyl-phosphate N-acetylglucosaminephosphotransferase [Escherichia coli]		2198
562.22978.con.0020_60|562.22978	COG2719	S	Cluster 3975	2929.0	True	False				False	protein:plasmid:17935 Length: 514 # NCBI annotation: hypothetical protein # Family: family:all:6329 # MgeID: mge:465 # MgeName: pMLb # Cross-refs: genbank:acc:NP_109487;genbank:gi:13488480;genbank:GeneID:1224459	True		False						{'IPR007390'}	WP_000190855.1 MULTISPECIES: SpoVR family protein [Enterobacteriaceae]		2199
562.22979.con.0062_6|562.22979			Cluster 32614	14.0	False	False				False	protein:plasmid:153924 Length: 85 # NCBI annotation: membrane protein # Family: family:all:20167 # MgeID: mge:1030 # MgeName: R478 # Cross-refs: genbank:gi:38348004;uniprot:Q6MXL4;genbank:GeneID:2653806	True		False							WP_001804901.1 hypothetical protein [Serratia marcescens]	True	2200
562.22979.con.0066_1|562.22979	COG3093	R	Cluster 27976	7.0	False	False				False		False		False	{'GO:0003677'}		{'GO:0003677'}		{'MetaCyc: PWY-6147', 'KEGG: 00910', 'Reactome: R-MMU-111465', 'KEGG: 00250', 'MetaCyc: PWY-8067', 'MetaCyc: PWY-7539', 'KEGG: 00270', 'MetaCyc: PWY-6749', 'MetaCyc: PWY-6502', 'Reactome: R-HSA-8940973', 'Reactome: R-HSA-6807505', 'Reactome: R-XTR-6807505', 'MetaCyc: PWY-7821', 'Reactome: R-MMU-6807505', 'Reactome: R-HSA-9018519', 'Reactome: R-HSA-210744', 'MetaCyc: PWY-8013', 'Reactome: R-HSA-18…	{'IPR013430', 'IPR001387', 'IPR010982'}	WP_023316024.1 MULTISPECIES: addiction module antidote protein, HigA family [Enterobacterales]		2201
562.22979.con.0066_2|562.22979	COG3549	R	Cluster 29535	6.0	False	False				False	protein:proph:185083 Length: 92 # NCBI annotation: plasmid maintenance system killer # Family: family:all:757 # MgeID: mge:2763 # MgeName: prophinder:46408 # Cross-refs: genbank:acc:YP_866792;interpro:IPR007711;genbank:gi:117926175;genbank:GeneID:4480791	True		False						{'IPR007711', 'IPR035093'}	WP_023316025.1 MULTISPECIES: hypothetical protein [Enterobacterales]	True	2202
562.22979.con.0066_3|562.22979			Cluster 33469	6.0	False	False				False		False		False							WP_023316026.1 MULTISPECIES: hypothetical protein [Enterobacterales]	True	2203
562.22979.con.0082_2|562.22979			Cluster 13884	75.0	False	False				False	protein:plasmid:137099 Length: 275 # NCBI annotation: hypothetical protein # Family: family:all:1492 # MgeID: mge:1948 # MgeName: pLEW517 # Cross-refs: genbank:gi:133756237;genbank:GeneID:4924712	True		False					{'MetaCyc: PWY-8119', 'Reactome: R-CEL-110320', 'Reactome: R-HSA-110320', 'Reactome: R-XTR-110320', 'Reactome: R-BTA-110320', 'Reactome: R-RNO-110320', 'Reactome: R-MMU-110320', 'Reactome: R-DRE-110320'}	{'IPR006640'}	WP_000334825.1 zinc metalloprotease [Enterobacter cloacae]		2204
562.22979.con.0082_4|562.22979	COG3231	J	Cluster 11047	931.0	False	True	APH(3'')-Ib	3002639.0	{ANT2, APH3, APH3'', APH3'}	True	protein:plasmid:137091 Length: 329 # NCBI annotation: hypothetical protein # Family: family:all:236 # MgeID: mge:1948 # MgeName: pLEW517 # Cross-refs: genbank:gi:133756229;genbank:GeneID:4924704	True		False	{'GO:0005524', 'GO:0016773', 'GO:0046677'}		{'GO:0005524', 'GO:0016773'}	{'GO:0046677'}	{'Reactome: R-HSA-8856828', 'Reactome: R-DDI-389357', 'Reactome: R-DME-2179392', 'Reactome: R-HSA-2995383', 'MetaCyc: PWY-6027', 'Reactome: R-MMU-983695', 'Reactome: R-HSA-5210891', 'Reactome: R-GGA-2871796', 'Reactome: R-HSA-5693565', 'Reactome: R-HSA-1660514', 'Reactome: R-MMU-381042', 'MetaCyc: PWY-7693', 'Reactome: R-MMU-165158', 'Reactome: R-GGA-1227739', 'Reactome: R-HSA-975155', 'Reactome:…	{'IPR011009', 'IPR002575', 'IPR024165'}	SAM66451.1 Aminoglycoside 3'-phosphotransferase [Klebsiella quasipneumoniae subsp. similipneumoniae]		2205
562.22979.con.0118_1|562.22979			Cluster 11502	479.0	False	True	ANT(3'')-IIa	3004089.0	{ANT2, ANT3, ANT9, ANT}	True	protein:plasmid:119148 Length: 336 # NCBI annotation: aminoglycoside adenylyltransferase # Family: family:all:373 # MgeID: mge:1908 # MgeName: pIP1202 # Cross-refs: genbank:gi:134044754;genbank:GeneID:4927362	True		False	{'GO:0016779'}		{'GO:0016779'}		{'Reactome: R-RNO-5693571', 'MetaCyc: PWY-8176', 'Reactome: R-RNO-5689880', 'KEGG: 00230', 'MetaCyc: PWY-7878', 'Reactome: R-SPO-429947', 'Reactome: R-HSA-5649702', 'Reactome: R-DRE-110362', 'MetaCyc: PWY-6575', 'Reactome: R-MMU-72163', 'MetaCyc: PWY-6368', 'Reactome: R-DRE-110381', 'Reactome: R-HSA-110373', 'MetaCyc: PWY-6720', 'MetaCyc: PWY-8052', 'Reactome: R-HSA-909733', 'Reactome: R-MMU-8983…	{'IPR002934', 'IPR043519', 'IPR025184'}	KDI12787.1 hypothetical protein AE70_01270, partial [Klebsiella pneumoniae CHS 14]	True	2206
562.22989.con.0004_58|562.22989	COG3155	Q	Cluster 17571	2931.0	True	False				False	protein:plasmid:145550 Length: 215 # NCBI annotation: hypothetical protein # Family: family:all:18815 # MgeID: mge:1971 # MgeName: pVIBHAR # Cross-refs: genbank:gi:156936738;interpro:IPR002818;genbank:GeneID:5552713	True		False					{'MetaCyc: PWY-6027', 'MetaCyc: PWY-7091', 'Reactome: R-DDI-6798695', 'Reactome: R-HSA-73817', 'MetaCyc: PWY-7407', 'MetaCyc: PWY-5800', 'Reactome: R-DRE-499943', 'MetaCyc: PWY-7693', 'MetaCyc: PWY-6906', 'Reactome: R-DME-9646399', 'MetaCyc: PWY-7052', 'MetaCyc: PWY-6720', 'Reactome: R-HSA-499943', 'MetaCyc: PWY-7694', 'MetaCyc: PWY-5994', 'MetaCyc: PWY-7057', 'MetaCyc: PWY-8035', 'KEGG: 00600', …	{'IPR026041', 'IPR029062'}	AAA58011.1 sigma cross-reacting protein 27A [Escherichia coli str. K-12 substr. MG1655]		2207
562.22990.con.0008_168|562.22990	COG5295	UW	Cluster 151	496.0	False	False				False	protein:plasmid:121464 Length: 1431 # NCBI annotation: Adhesin # Family: family:all:60 # MgeID: mge:819 # MgeName: pO113 # Cross-refs: genbank:gi:73853301;genbank:GeneID:3654491	True		False	{'GO:0009405', 'GO:0019867'}	{'GO:0019867'}		{'GO:0009405'}	{'MetaCyc: PWY-8119', 'MetaCyc: PWY-7543', 'MetaCyc: PWY-7612', 'MetaCyc: PWY-7056', 'MetaCyc: PWY-6737', 'KEGG: 00230', 'MetaCyc: PWY-7702', 'MetaCyc: PWY-7091', 'MetaCyc: PWY-6855', 'MetaCyc: PWY-7571', 'MetaCyc: PWY-6379', 'MetaCyc: PWY-7650', 'MetaCyc: PWY-7134', 'MetaCyc: PWY-7445', 'MetaCyc: PWY-7569', 'MetaCyc: PWY-6527', 'MetaCyc: PWY-6749', 'MetaCyc: PWY-7577', 'MetaCyc: PWY-6289', 'Meta…	{'IPR008635', 'IPR011049', 'IPR005594', 'IPR008640', 'IPR024973'}	WP_022296275.1 hypothetical protein [Escherichia coli]	True	2208
562.22991.con.0007_67|562.22991	COG4977	K	Cluster 12435	2917.0	True	False			{marA, ramA, robA}	True		False		False	{'GO:0006355', 'GO:0043565', 'GO:0019299', 'GO:0003700'}		{'GO:0043565', 'GO:0003700'}	{'GO:0006355', 'GO:0019299'}	{'MetaCyc: PWY-5301', 'Reactome: R-CEL-3214842', 'MetaCyc: PWY-6027', 'Reactome: R-HSA-156711', 'MetaCyc: PWY-7161', 'Reactome: R-HSA-5693565', 'MetaCyc: PWY-7407', 'Reactome: R-MMU-72163', 'Reactome: R-MMU-350054', 'Reactome: R-XTR-174417', 'Reactome: R-HSA-5620916', 'Reactome: R-BTA-71240', 'MetaCyc: PWY-7693', 'MetaCyc: PWY-5692', 'MetaCyc: PWY-7009', 'Reactome: R-MMU-174417', 'Reactome: R-HSA…	{'IPR018060', 'IPR023609', 'IPR020449', 'IPR037923', 'IPR014710', 'IPR009057', 'IPR018062', 'IPR003313'}	WP_000217150.1 transcriptional activator RhaS [Escherichia coli]		2209
562.22991.con.0007_90|562.22991	COG1217	T	Cluster 19162	2928.0	True	False				False		False		False	{'GO:0016787'}		{'GO:0016787'}		{'MetaCyc: PWY-7091', 'Reactome: R-HSA-6796648', 'Reactome: R-BTA-73817', 'Reactome: R-HSA-73817', 'Reactome: R-HSA-5693565', 'MetaCyc: PWY-5269', 'Reactome: R-MMU-4085001', 'MetaCyc: PWY-5818', 'MetaCyc: PWY-6906', 'Reactome: R-HSA-113418', 'MetaCyc: PWY-6160', 'MetaCyc: PWY-6720', 'KEGG: 00740', 'MetaCyc: PWY-6908', 'Reactome: R-DDI-74259', 'Reactome: R-SPO-1483213', 'MetaCyc: PWY-7057', 'MetaC…	{'IPR023214', 'IPR036412', 'IPR041492', 'IPR023198', 'IPR006439'}	WP_001315111.1 MULTISPECIES: phosphatase [Enterobacteriaceae]		2210
562.22996.con.0015_15|562.22996			Cluster 28206	59.0	False	False				False		False		False							STK47650.1 Uncharacterised protein [Escherichia coli]	True	2211
562.22997.con.0128_2|562.22997			Cluster 30262	6.0	False	False				False		False		False							ESD81139.1 hypothetical protein HMPREF1612_05129 [Escherichia coli 908585]	True	2212
562.23006.con.0049_15|562.23006	COG2207	K	Cluster 26084	8.0	False	False			{marA, ramA, robA}	True	protein:plasmid:19670 Length: 138 # NCBI annotation: tetracycline resistance protein D # Family: family:all:40 # MgeID: mge:518 # MgeName: R100 # Cross-refs: genbank:acc:NP_052933;genbank:gi:9507602;genbank:GeneID:1263446	True		False	{'GO:0006355', 'GO:0043565', 'GO:0003700'}		{'GO:0043565', 'GO:0003700'}	{'GO:0006355'}	{'Reactome: R-CEL-3214842', 'MetaCyc: PWY-6027', 'Reactome: R-HSA-156711', 'Reactome: R-HSA-5693565', 'MetaCyc: PWY-7407', 'Reactome: R-MMU-72163', 'Reactome: R-MMU-350054', 'Reactome: R-XTR-174417', 'MetaCyc: PWY-7693', 'Reactome: R-MMU-174417', 'Reactome: R-HSA-1839117', 'Reactome: R-HSA-6785807', 'MetaCyc: PWY-7694', 'MetaCyc: PWY-5994', 'MetaCyc: PWY-2723', 'MetaCyc: PWY-8035', 'Reactome: R-R…	{'IPR009057', 'IPR018062', 'IPR018060', 'IPR020449'}	WP_021571235.1 MULTISPECIES: helix-turn-helix domain-containing protein [Enterobacteriaceae]		2213
562.23009.con.0010_125|562.23009	COG4619	R	Cluster 16339	2930.0	True	False			{ABC_efflux, macB, msbA}	True	protein:plasmid:134289 Length: 216 # NCBI annotation: ABC transporter # Family: family:all:1 # MgeID: mge:1943 # MgeName: pGdh442 # Cross-refs: genbank:gi:146322275;genbank:GeneID:5077299	True		False	{'GO:0005524', 'GO:0016887'}		{'GO:0005524', 'GO:0016887'}		{'Reactome: R-HSA-8856828', 'Reactome: R-DME-2179392', 'MetaCyc: PWY-6027', 'Reactome: R-GGA-68689', 'Reactome: R-RNO-5696400', 'Reactome: R-BTA-73817', 'Reactome: R-MMU-381042', 'Reactome: R-GGA-2871796', 'Reactome: R-HSA-5693565', 'Reactome: R-DME-5610780', 'Reactome: R-DDI-5358565', 'Reactome: R-HSA-9684325', 'MetaCyc: PWY-3841', 'Reactome: R-HSA-1660514', 'MetaCyc: PWY-6659', 'Reactome: R-HSA…	{'IPR003593', 'IPR027417', 'IPR017871', 'IPR003439'}	AAN79089.1 Hypothetical ABC transporter ATP-binding protein ybbL [Escherichia coli CFT073]		2214
562.23012.con.0153_1|562.23012			Cluster 37580	845.0	False	False				False		False		False							WP_000047475.1 hypothetical protein [Escherichia coli]	True	2215
562.23014.con.0003_44|562.23014			Cluster 17498	2928.0	True	False				False		False		False					{'MetaCyc: PWY-6027', 'MetaCyc: PWY-7407', 'Reactome: R-HSA-5620916', 'MetaCyc: PWY-7693', 'MetaCyc: PWY-7694', 'MetaCyc: PWY-5994', 'Reactome: R-MMU-1474151', 'MetaCyc: PWY-8035', 'MetaCyc: PWY-7448', 'MetaCyc: PWY-7670', 'MetaCyc: PWY-5437', 'MetaCyc: PWY-8143', 'Reactome: R-CEL-5673001', 'MetaCyc: PWY-7352', 'MetaCyc: PWY-7659', 'Reactome: R-MMU-1296072', 'MetaCyc: PWY-7950', 'Reactome: R-DME-…	{'IPR034719', 'IPR041687', 'IPR018490'}	WP_001144262.1 hydrogen peroxide resistance inhibitor IprA [Escherichia coli]		2216
562.23014.con.0032_34|562.23014	COG2207	K	Cluster 14929	2871.0	False	False				False	protein:plasmid:151328 Length: 234 # NCBI annotation: putative AraC family regulatory protein # Family: family:all:553 # MgeID: mge:1084 # MgeName: pCoo # Cross-refs: genbank:gi:83404841;genbank:GeneID:3829366	True		False	{'GO:0006355', 'GO:0043565', 'GO:0003700'}		{'GO:0043565', 'GO:0003700'}	{'GO:0006355'}	{'Reactome: R-CEL-3214842', 'MetaCyc: PWY-6027', 'Reactome: R-HSA-156711', 'Reactome: R-HSA-5693565', 'MetaCyc: PWY-7407', 'Reactome: R-MMU-72163', 'Reactome: R-MMU-350054', 'Reactome: R-XTR-174417', 'MetaCyc: PWY-7693', 'Reactome: R-MMU-174417', 'Reactome: R-HSA-1839117', 'Reactome: R-HSA-6785807', 'MetaCyc: PWY-7694', 'MetaCyc: PWY-5994', 'MetaCyc: PWY-2723', 'MetaCyc: PWY-8035', 'Reactome: R-R…	{'IPR009057', 'IPR018062', 'IPR018060', 'IPR020449'}	WP_000060463.1 transcriptional regulator YdeO [Shigella dysenteriae]		2217
562.23016.con.0014_7|562.23016	COG2137	R	Cluster 21895	2930.0	True	False				False	protein:proph:175963 Length: 152 # NCBI annotation: recombination regulator RecX # Family: family:all:4717 # MgeID: mge:2497 # MgeName: prophinder:44732 # Cross-refs: genbank:acc:NP_793794;genbank:gi:28871175;genbank:GeneID:1185711	True		False	{'GO:0006282'}			{'GO:0006282'}	{'Reactome: R-HSA-8856828', 'MetaCyc: PWY-6027', 'Reactome: R-CEL-3214842', 'Reactome: R-RNO-5696400', 'Reactome: R-HSA-5368598', 'Reactome: R-HSA-1660514', 'Reactome: R-HSA-5693565', 'Reactome: R-DME-5610780', 'MetaCyc: PWY-7693', 'Reactome: R-DDI-174178', 'MetaCyc: PWY-6720', 'MetaCyc: PWY-5994', 'MetaCyc: PWY-2723', 'MetaCyc: PWY-8035', 'Reactome: R-XTR-110312', 'Reactome: R-DME-4086400', 'Met…	{'IPR036388', 'IPR003783'}	WP_021522197.1 recombination regulator RecX [Escherichia coli]		2218
562.23018.con.0015_147|562.23018	COG0153	G	Cluster 7185	2930.0	True	False				False	protein:plasmid:123072 Length: 389 # NCBI annotation: galactokinase # Family: family:all:8243 # MgeID: mge:1020 # MgeName: pE33L466 # Cross-refs: genbank:gi:67078216;genbank:GeneID:3399924	True		False	{'GO:0005524', 'GO:0005737', 'GO:0006012', 'GO:0016301', 'GO:0016773', 'GO:0004335', 'GO:0046835'}	{'GO:0005737'}	{'GO:0016301', 'GO:0005524', 'GO:0016773', 'GO:0004335'}	{'GO:0046835', 'GO:0006012'}	{'Reactome: R-HSA-6796648', 'Reactome: R-DDI-6798695', 'Reactome: R-SCE-5358565', 'Reactome: R-DDI-5358565', 'Reactome: R-HSA-975957', 'Reactome: R-MMU-72163', 'Reactome: R-RNO-1799339', 'MetaCyc: PWY-6654', 'Reactome: R-BTA-5419276', 'Reactome: R-CEL-72695', 'Reactome: R-CEL-5389840', 'Reactome: R-HSA-6785807', 'Reactome: R-MMU-1474151', 'Reactome: R-MMU-72706', 'Reactome: R-RNO-8852276', 'React…	{'IPR006204', 'IPR020568', 'IPR006206', 'IPR006203', 'IPR013750', 'IPR014721', 'IPR019741', 'IPR000705', 'IPR019539', 'IPR022963', 'IPR036554'}	EGI27026.1 galactokinase [Escherichia coli TA206]		2219
562.23018.con.0026_70|562.23018			Cluster 40125	8.0	False	False				False		False		False							EQP95644.1 hypothetical protein G746_00965 [Escherichia coli HVH 84 (4-1021478)]	True	2220
562.23018.con.0074_3|562.23018			Cluster 29688	53.0	False	False				False	protein:plasmid:16961 Length: 94 # NCBI annotation: CcgC protein # Family: family:all:21110 # MgeID: mge:409 # MgeName: R46 # Cross-refs: genbank:acc:NP_511211;genbank:gi:17530613;genbank:GeneID:1263145	True		False							WP_013263793.1 MULTISPECIES: hypothetical protein [Enterobacterales]	True	2221
562.23022.con.0002_75|562.23022	COG0475	P	Cluster 2582	2926.0	True	False				False	protein:plasmid:27984 Length: 593 # NCBI annotation: putative potassium-efflux protein # Family: family:all:1056 # MgeID: mge:608 # MgeName: pSymB # Cross-refs: genbank:acc:NP_437535;genbank:gi:16264743;genbank:GeneID:1237326	True		False	{'GO:0051595', 'GO:0015503', 'GO:0015299', 'GO:0006813', 'GO:0008324', 'GO:0015079', 'GO:0055085', 'GO:0019899', 'GO:0005886', 'GO:0016021', 'GO:0015643', 'GO:0006812', 'GO:0005887'}	{'GO:0005886', 'GO:0016021', 'GO:0005887'}	{'GO:0015503', 'GO:0015299', 'GO:0008324', 'GO:0015079', 'GO:0019899', 'GO:0015643'}	{'GO:0051595', 'GO:0006813', 'GO:0055085', 'GO:0006812'}	{'MetaCyc: PWY-6027', 'MetaCyc: PWY-6664', 'MetaCyc: PWY-7862', 'MetaCyc: PWY-3841', 'MetaCyc: PWY-6659', 'MetaCyc: PWY-7693', 'Reactome: R-HSA-77111', 'MetaCyc: PWY-7605', 'Reactome: R-DDI-70171', 'MetaCyc: PWY-6654', 'MetaCyc: PWY-6160', 'MetaCyc: PWY-7341', 'MetaCyc: PWY-5994', 'MetaCyc: PWY-7057', 'MetaCyc: PWY-8035', 'KEGG: 00472', 'Reactome: R-RNO-77305', 'MetaCyc: PWY-8034', 'MetaCyc: PWY-…	{'IPR023941', 'IPR006036', 'IPR006153', 'IPR004771', 'IPR036291', 'IPR038770', 'IPR003148'}	WP_001523933.1 glutathione-regulated potassium-efflux system protein KefC [Escherichia coli]		2222
562.23022.con.0003_323|562.23022	COG3164	S	Cluster 285	2930.0	True	False				False		False		False						{'IPR011836', 'IPR032712', 'IPR025263'}	WP_001253539.1 AsmA2 domain-containing protein [Escherichia coli]		2223
562.23022.con.0007_76|562.23022	COG3311	K	Cluster 36039	43.0	False	False				False		False		False					{'Reactome: R-DME-6782135', 'Reactome: R-HSA-2173795', 'Reactome: R-DME-5696395', 'Reactome: R-HSA-201451', 'Reactome: R-GGA-353303', 'MetaCyc: PWY-6689', 'KEGG: 00270', 'Reactome: R-HSA-5696395', 'Reactome: R-MMU-201451', 'Reactome: R-HSA-5696400', 'Reactome: R-MMU-5696395', 'Reactome: R-HSA-6782135', 'Reactome: R-HSA-379716', 'Reactome: R-MMU-6781823', 'Reactome: R-HSA-6781823', 'Reactome: R-SC…	{'IPR009061', 'IPR010260'}	WP_097169344.1 AlpA family transcriptional regulator [Escherichia coli]		2224
562.23022.con.0011_75|562.23022	COG0430	A	Cluster 9927	2930.0	True	False				False		False		False	{'GO:0003824', 'GO:0003963', 'GO:0006396'}		{'GO:0003824', 'GO:0003963'}	{'GO:0006396'}	{'Reactome: R-SCE-6791226', 'Reactome: R-RNO-5689880', 'MetaCyc: PWY-6163', 'Reactome: R-MMU-6791226', 'Reactome: R-HSA-6791226', 'Reactome: R-CEL-6791226', 'MetaCyc: PWY-7953', 'KEGG: 00520', 'MetaCyc: PWY-6707', 'Reactome: R-MMU-5689880', 'Reactome: R-SPO-6791226', 'Reactome: R-DME-6791226', 'Reactome: R-BTA-5689880', 'KEGG: 01100', 'MetaCyc: PWY-6386', 'Reactome: R-MTU-964903', 'KEGG: 00400', …	{'IPR013791', 'IPR036553', 'IPR020719', 'IPR013792', 'IPR000228', 'IPR017770', 'IPR023797', 'IPR037136'}	WP_097169181.1 RNA 3'-terminal phosphate cyclase [Escherichia coli]		2225
562.23025.con.0011_2|562.23025	COG3468	MU	Cluster 244	529.0	False	False				False	protein:plasmid:16159 Length: 1300 # NCBI annotation: EspP # Family: family:all:60 # MgeID: mge:373 # MgeName: pO157 # Cross-refs: genbank:acc:NP_052685;genbank:gi:10955344;genbank:GeneID:1789732	True		False	{'GO:0006508', 'GO:0004252', 'GO:0019867', 'GO:0004175'}	{'GO:0019867'}	{'GO:0004252', 'GO:0004175'}	{'GO:0006508'}	{'MetaCyc: PWY-5301', 'MetaCyc: PWY-7091', 'MetaCyc: PWY-6855', 'MetaCyc: PWY-8036', 'MetaCyc: PWY-7161', 'MetaCyc: PWY-5729', 'KEGG: 00531', 'MetaCyc: PWY-5996', 'MetaCyc: PWY-7631', 'MetaCyc: PWY-6948', 'MetaCyc: PWY-6795', 'MetaCyc: PWY-6906', 'KEGG: 01040', 'MetaCyc: PWY-7151', 'MetaCyc: PWY-1121', 'MetaCyc: PWY-5748', 'MetaCyc: PWY-5305', 'MetaCyc: PWY-7668', 'KEGG: 00051', 'MetaCyc: PWY-804…	{'IPR036709', 'IPR012332', 'IPR005546', 'IPR030396', 'IPR011050', 'IPR006315', 'IPR000710'}	WP_001080127.1 autotransporter outer membrane beta-barrel domain-containing protein [Escherichia coli]		2226
562.23031.con.0007_23|562.23031	COG0842	V	Cluster 8373	2928.0	True	False				False	protein:plasmid:27859 Length: 370 # NCBI annotation: putative ABC transporter permease protein # Family: family:all:395 # MgeID: mge:608 # MgeName: pSymB # Cross-refs: genbank:acc:NP_437410;genbank:gi:16264618;genbank:GeneID:1237201	True		False	{'GO:0016021', 'GO:0055085', 'GO:0043190'}	{'GO:0016021', 'GO:0043190'}		{'GO:0055085'}		{'IPR000412'}	WP_000469031.1 MULTISPECIES: inner membrane transport permease YbhR [Proteobacteria]		2227
562.23040.con.0007_12|562.23040	COG3121	NU	Cluster 10270	2515.0	False	False				False	protein:plasmid:137126 Length: 245 # NCBI annotation: fimbrial chaperone protein, periplasmic # Family: family:all:991 # MgeID: mge:831 # MgeName: large plasmid # Cross-refs: genbank:gi:71725143;genbank:GeneID:3555260	True		False	{'GO:0030288', 'GO:0043711', 'GO:0061077', 'GO:0071555'}	{'GO:0030288'}		{'GO:0061077', 'GO:0043711', 'GO:0071555'}	{'Reactome: R-HSA-8856828', 'Reactome: R-RNO-210991', 'Reactome: R-MMU-2024096', 'MetaCyc: PWY-6027', 'MetaCyc: PWY-7420', 'Reactome: R-MMU-983695', 'Reactome: R-RNO-418346', 'MetaCyc: PWY-3841', 'Reactome: R-HSA-1660514', 'MetaCyc: PWY-6659', 'Reactome: R-MMU-419037', 'Reactome: R-HSA-5620916', 'MetaCyc: PWY-7693', 'MetaCyc: PWY-7605', 'Reactome: R-MMU-9027276', 'Reactome: R-HSA-2424491', 'MetaC…	{'IPR013783', 'IPR029058', 'IPR016147', 'IPR001829', 'IPR018046', 'IPR016148', 'IPR036316', 'IPR008962'}	WP_000859696.1 alpha/beta fold hydrolase [Escherichia coli]		2228
562.23040.con.0013_113|562.23040	COG0266	L	Cluster 11214	2930.0	True	False				False		False		False	{'GO:0019104', 'GO:0003676', 'GO:0006284', 'GO:0003677', 'GO:0008270', 'GO:0003684', 'GO:0016799', 'GO:0006281', 'GO:0008534', 'GO:0003906'}		{'GO:0019104', 'GO:0003676', 'GO:0003677', 'GO:0008270', 'GO:0003684', 'GO:0016799', 'GO:0008534', 'GO:0003906'}	{'GO:0006281', 'GO:0006284'}	{'Reactome: R-RNO-975957', 'Reactome: R-RNO-72689', 'Reactome: R-SPO-975956', 'Reactome: R-DDI-72706', 'Reactome: R-HSA-5649702', 'Reactome: R-DRE-6791226', 'Reactome: R-HSA-975957', 'Reactome: R-CFA-72702', 'Reactome: R-SCE-72695', 'Reactome: R-DRE-72702', 'Reactome: R-RNO-1799339', 'Reactome: R-MMU-1799339', 'Reactome: R-BTA-975956', 'Reactome: R-CFA-975957', 'Reactome: R-BTA-1799339', 'Reactom…	{'IPR000214', 'IPR012319', 'IPR010979', 'IPR020629', 'IPR015887', 'IPR010663', 'IPR035937', 'IPR015886'}	EJE96814.1 formamidopyrimidine/5-formyluracil/ 5-hydroxymethyluracil DNA glycosylase, partial [Escherichia coli O111:H11 str. CVM9455]		2229
562.23040.con.0027_1|562.23040	COG0642	T	Cluster 5139	2930.0	True	False			{adeS, baeS, phoQ, vanS}	True	protein:plasmid:22567 Length: 438 # NCBI annotation: PROBABLE TRANSMEMBRANE TWO-COMPONENT SENSOR KINASE TRANSCRIPTION REGULATOR PROTEIN # Family: family:all:5 # MgeID: mge:570 # MgeName: pGMI1000MP # Cross-refs: genbank:acc:NP_523112;genbank:gi:17549772;genbank:GeneID:1223865	True		False	{'GO:0000155', 'GO:0007165'}		{'GO:0000155'}	{'GO:0007165'}	{'Reactome: R-HSA-4420097', 'Reactome: R-RNO-399954', 'Reactome: R-HSA-3371497', 'MetaCyc: PWY-8176', 'Reactome: R-RNO-380320', 'KEGG: 00230', 'MetaCyc: PWY-7878', 'Reactome: R-DDI-6798695', 'Reactome: R-HSA-6796648', 'Reactome: R-BTA-381426', 'Reactome: R-HSA-70895', 'Reactome: R-BTA-6798695', 'Reactome: R-HSA-204174', 'MetaCyc: PWY-6575', 'Reactome: R-SCE-5358565', 'Reactome: R-SPO-204174', 'Re…	{'IPR003661', 'IPR036890', 'IPR005467', 'IPR036097', 'IPR003594', 'IPR013727'}	WP_089502965.1 two-component system sensor histidine kinase QseC [Escherichia coli]		2230
562.23045.con.0016_108|562.23045	COG4948	M	Cluster 6180	2924.0	True	False				False	protein:plasmid:155615 Length: 402 # NCBI annotation: Mandelate racemase/muconate lactonizing enzyme, N-terminal domain protein # Family: family:all:139 # MgeID: mge:1994 # MgeName: pNL2 # Cross-refs: genbank:gi:146275900;interpro:IPR001354;interpro:IPR013341;interpro:IPR013342;genbank:GeneID:5077823	True		False	{'GO:0009063'}			{'GO:0009063'}	{'MetaCyc: PWY-1501', 'KEGG: 00623', 'MetaCyc: PWY-6948', 'Reactome: R-CEL-70263', 'MetaCyc: PWY-6192', 'Reactome: R-DDI-70171', 'MetaCyc: PWY-7282', 'KEGG: 00051', 'MetaCyc: PWY-8047', 'MetaCyc: PWY-6714', 'MetaCyc: PWY-8152', 'KEGG: 00361', 'MetaCyc: PWY-6886', 'MetaCyc: PWY-7547', 'MetaCyc: PWY-7695', 'MetaCyc: PWY-6107', 'KEGG: 00040', 'MetaCyc: PWY-6142', 'MetaCyc: PWY-5087', 'MetaCyc: PWY-5…	{'IPR034589', 'IPR029065', 'IPR013342', 'IPR034593', 'IPR013341', 'IPR018110', 'IPR029017', 'IPR036849'}	ELD48826.1 starvation-sensing protein rspA [Escherichia coli KTE224]		2231
562.23047.con.0017_13|562.23047			Cluster 38022	3.0	False	False				False	protein:proph:176827 Length: 199 # NCBI annotation: putative phage capsid protease # Family: family:all:21 # MgeID: mge:2520 # MgeName: prophinder:43595 # Cross-refs: genbank:acc:YP_853042;genbank:gi:117624129;genbank:GeneID:4493960	True		False							OUF91708.1 hypothetical protein AZ030_001220 [Escherichia coli]	True	2232
562.23047.con.0058_10|562.23047			Cluster 25734	7.0	False	False				False	protein:proph:183566 Length: 136 # NCBI annotation: hypothetical protein # Family: family:all:25914 # MgeID: mge:2713 # MgeName: prophinder:46772 # Cross-refs: genbank:acc:YP_687797;genbank:gi:110804277;genbank:GeneID:4211043	True		False							WP_000028500.1 MULTISPECIES: hypothetical protein [Enterobacteriaceae]	True	2235
562.23047.con.0058_11|562.23047			Cluster 8325	7.0	False	False				False	protein:proph:183565 Length: 379 # NCBI annotation: hypothetical protein # Family: family:all:25913 # MgeID: mge:2713 # MgeName: prophinder:46772 # Cross-refs: genbank:acc:YP_687796;genbank:gi:110804276;genbank:GeneID:4211042	True		False							WP_001115414.1 MULTISPECIES: hypothetical protein [Enterobacteriaceae]	True	2236
562.23047.con.0058_8|562.23047			Cluster 22697	7.0	False	False				False		False		False							WP_000070869.1 MULTISPECIES: hypothetical protein [Enterobacteriaceae]	True	2233
562.23047.con.0058_9|562.23047			Cluster 34169	7.0	False	False				False		False		False							WP_000854792.1 MULTISPECIES: hypothetical protein [Enterobacteriaceae]	True	2234
562.23047.con.0072_1|562.23047			Cluster 34929	3.0	False	False				False		False		False							KLX44684.1 hypothetical protein SK74_04835, partial [Escherichia coli]	True	2237
562.23049.con.0003_129|562.23049	COG2025	C	Cluster 11503	2918.0	True	False				False	protein:plasmid:147784 Length: 378 # NCBI annotation: FixB electron transfer protein # Family: family:all:837 # MgeID: mge:1034 # MgeName: pRL10 # Cross-refs: genbank:gi:116254641;goa:Q1M7V5;uniprot:Q1M7V5;genbank:GeneID:4403966	True		False	{'GO:0050660', 'GO:0009055'}		{'GO:0050660', 'GO:0009055'}		{'MetaCyc: PWY-5104', 'Reactome: R-HSA-2995383', 'MetaCyc: PWY-6027', 'Reactome: R-HSA-73817', 'MetaCyc: PWY-7407', 'MetaCyc: PWY-5800', 'MetaCyc: PWY-7693', 'MetaCyc: PWY-6389', 'MetaCyc: PWY-6720', 'KEGG: 00740', 'MetaCyc: PWY-7694', 'MetaCyc: PWY-5994', 'Reactome: R-SPO-1483213', 'MetaCyc: PWY-8035', 'Reactome: R-SCE-196843', 'MetaCyc: PWY-7448', 'MetaCyc: PWY-7670', 'MetaCyc: PWY-5437', 'Meta…	{'IPR014730', 'IPR001308', 'IPR014729', 'IPR014731', 'IPR018206', 'IPR029035'}	WP_021517146.1 electron transfer flavoprotein subunit alpha [Escherichia coli]		2238
562.23054.con.0130_3|562.23054			Cluster 29539	364.0	False	False				False	protein:plasmid:151268 Length: 71 # NCBI annotation: modulator of Hok protein # Family: family:all:1814 # MgeID: mge:1084 # MgeName: pCoo # Cross-refs: genbank:gi:83404854;genbank:GeneID:3829306	True		False						{'IPR035273'}	WP_001442096.1 MULTISPECIES: modulator protein [Enterobacteriaceae]		2239
562.23056.con.0020_75|562.23056	COG0365	I	Cluster 2216	2929.0	True	False				False	protein:plasmid:23148 Length: 652 # NCBI annotation: hypothetical protein # Family: family:all:14 # MgeID: mge:573 # MgeName: pRi1724 # Cross-refs: genbank:acc:NP_066662;genbank:gi:10954727;genbank:GeneID:874783	True		False	{'GO:0003987', 'GO:0019427', 'GO:0016208'}		{'GO:0003987', 'GO:0016208'}	{'GO:0019427'}	{'MetaCyc: PWY-8002', 'MetaCyc: PWY-5301', 'Reactome: R-MMU-159418', 'MetaCyc: PWY-5104', 'MetaCyc: PWY-6027', 'MetaCyc: PWY-5789', 'MetaCyc: PWY-7161', 'MetaCyc: PWY-7407', 'MetaCyc: PWY-6659', 'MetaCyc: PWY-7693', 'Reactome: R-HSA-77111', 'MetaCyc: PWY-7397', 'Reactome: R-HSA-177135', 'MetaCyc: PWY-7605', 'MetaCyc: PWY-7694', 'MetaCyc: PWY-5994', 'Reactome: R-RNO-177128', 'MetaCyc: PWY-8035', '…	{'IPR020845', 'IPR000873', 'IPR011904', 'IPR025110', 'IPR042099', 'IPR032387'}	WP_000078223.1 acetyl-coenzyme A synthetase [Escherichia coli]		2240
562.23066.con.0024_67|562.23066			Cluster 38884	7.0	False	False				False		False		False							ENB17394.1 hypothetical protein EC2875150_5366 [Escherichia coli 2875150]	True	2241
562.23066.con.0024_68|562.23066			Cluster 20591	7.0	False	False				False	protein:plasmid:24347 Length: 163 # NCBI annotation: hypothetical protein # Family: family:all:22420 # MgeID: mge:588 # MgeName: pHCM2 # Cross-refs: genbank:acc:NP_569494;genbank:gi:18466687;genbank:GeneID:1251410	True		False							WP_012640720.1 hypothetical protein [Escherichia coli]	True	2242
562.23069.con.0027_6|562.23069	COG2038	H	Cluster 3029	2926.0	True	False				False	protein:plasmid:148329 Length: 335 # NCBI annotation: nicotinate-nucleotide--dimethylbenzimidazole phosphoribosyltransferase # Family: family:all:4299 # MgeID: mge:1130 # MgeName: pTT27 # Cross-refs: genbank:gi:55978231;genbank:GeneID:3169236	True		False	{'GO:0008818', 'GO:0051073', 'GO:0009236', 'GO:0008939'}		{'GO:0008818', 'GO:0051073', 'GO:0008939'}	{'GO:0009236'}	{'KEGG: 00860', 'MetaCyc: PWY-6269', 'MetaCyc: PWY-7965', 'MetaCyc: PWY-7961', 'MetaCyc: PWY-7968', 'MetaCyc: PWY-5509', 'MetaCyc: PWY-7966', 'MetaCyc: PWY-7970', 'MetaCyc: PWY-7964', 'KEGG: 01100', 'MetaCyc: PWY-7967', 'MetaCyc: PWY-7969', 'MetaCyc: PWY-7975', 'MetaCyc: PWY-7963'}	{'IPR003805', 'IPR017846', 'IPR003200', 'IPR023195', 'IPR036087'}	WP_001166163.1 MULTISPECIES: nicotinate-nucleotide--dimethylbenzimidazole phosphoribosyltransferase [Escherichia]		2243
562.23073.con.0018_45|562.23073	COG0561	R	Cluster 14079	2931.0	True	False				False		False		False	{'GO:0016787'}		{'GO:0016787'}		{'MetaCyc: PWY-7091', 'Reactome: R-HSA-6796648', 'Reactome: R-BTA-73817', 'Reactome: R-HSA-73817', 'Reactome: R-HSA-5693565', 'MetaCyc: PWY-5269', 'Reactome: R-MMU-4085001', 'MetaCyc: PWY-5818', 'MetaCyc: PWY-6906', 'Reactome: R-HSA-113418', 'MetaCyc: PWY-6160', 'MetaCyc: PWY-6720', 'KEGG: 00740', 'MetaCyc: PWY-6908', 'Reactome: R-DDI-74259', 'Reactome: R-SPO-1483213', 'MetaCyc: PWY-7057', 'MetaC…	{'IPR023214', 'IPR006379', 'IPR000150', 'IPR036412'}	WP_000285350.1 pyridoxal phosphate phosphatase YigL [Escherichia coli]		2244
562.23096.con.0018_113|562.23096			Cluster 15434	6.0	False	False				False	protein:proph:176805 Length: 171 # NCBI annotation: hypothetical protein # Family: family:all:67 # MgeID: mge:2520 # MgeName: prophinder:43595 # Cross-refs: genbank:acc:YP_853054;genbank:gi:117624141;genbank:GeneID:4493270	True		False						{'IPR007539'}	WP_001702495.1 DUF551 domain-containing protein [Escherichia coli]	True	2245
562.23098.con.0017_12|562.23098			Cluster 17640	42.0	False	False				False		False		False							WP_000670937.1 hypothetical protein [Escherichia coli]	True	2246
562.23109.con.0146_1|562.23109			Cluster 28455	219.0	False	False				False		False		False							CAR08827.2 hypothetical protein ECED1_2646 [Escherichia coli ED1a]	True	2247
562.23124.con.0005_106|562.23124	COG3408	G	Cluster 1450	2928.0	True	False				False		False		False	{'GO:0005975', 'GO:0004555', 'GO:0005991'}		{'GO:0004555'}	{'GO:0005975', 'GO:0005991'}	{'MetaCyc: PWY-6771', 'MetaCyc: PWY-7463', 'MetaCyc: PWY-2902', 'MetaCyc: PWY-7091', 'MetaCyc: PWY-7145', 'MetaCyc: PWY-6855', 'MetaCyc: PWY-7651', 'MetaCyc: PWY-5926', 'MetaCyc: PWY-2722', 'MetaCyc: PWY-5800', 'Reactome: R-HSA-4793950', 'KEGG: 00980', 'MetaCyc: PWY-7623', 'MetaCyc: PWY-6906', 'MetaCyc: PWY-7151', 'MetaCyc: PWY-7918', 'MetaCyc: PWY-5875', 'Reactome: R-RNO-1660662', 'MetaCyc: PWY-…	{'IPR008928', 'IPR001661', 'IPR012341'}	WP_115783360.1 alpha-glucosidase [Escherichia coli]		2248
562.23137.con.0015_1|562.23137	COG4253	S	Cluster 27046	171.0	False	False				False		False		False					{'MetaCyc: PWY-8119'}	{'IPR018769'}	WP_117260667.1 DUF2345 domain-containing protein, partial [Klebsiella pneumoniae]	True	2249
562.23142.con.0008_129|562.23142	COG1966	T	Cluster 1875	2931.0	True	False				False	protein:plasmid:135959 Length: 784 # NCBI annotation: Carbon starvation protein, predicted membrane protein # Family: family:all:17321 # MgeID: mge:855 # MgeName: 4 # Cross-refs: genbank:gi:116326621;genbank:GeneID:4405867	True		False	{'GO:0009267', 'GO:0016020'}	{'GO:0016020'}		{'GO:0009267'}		{'IPR003706', 'IPR025299'}	OSK43752.1 carbon starvation protein A [Escherichia coli B671]		2250
562.23145.con.0064_6|562.23145	COG4644	L	Cluster 560	1046.0	False	False				False	protein:plasmid:112739 Length: 1015 # NCBI annotation: transposase # Family: family:all:24 # MgeID: mge:1099 # MgeName: pIGAL1 # Cross-refs: genbank:gi:38638185;genbank:GeneID:3722456	True		False	{'GO:0004803', 'GO:0006313'}		{'GO:0004803'}	{'GO:0006313'}		{'IPR025296', 'IPR002513'}	WP_001398206.1 MULTISPECIES: Tn3-like element Tn3 family transposase [Enterobacteriaceae]		2251
562.23151.con.0017_35|562.23151	COG1172	G	Cluster 4694	2926.0	True	False				False	protein:plasmid:143343 Length: 340 # NCBI annotation: Monosaccharide-transporting ATPase # Family: family:all:23 # MgeID: mge:1969 # MgeName: pSMED01 # Cross-refs: genbank:gi:150377030;interpro:IPR001851;genbank:GeneID:5317887	True		False	{'GO:0016021', 'GO:0055085', 'GO:0022857'}	{'GO:0016021'}	{'GO:0022857'}	{'GO:0055085'}		{'IPR001851'}	WP_112038272.1 sugar ABC transporter permease YjfF [Escherichia coli]		2252
562.23167.con.0059_6|562.23167			Cluster 40745	6.0	False	False				False		False		False									2253
562.23172.con.0051_6|562.23172	COG2312	R	Cluster 6867	14.0	False	True	EreA2	3002826.0		False		False		False	{'GO:0046677'}			{'GO:0046677'}	{'MetaCyc: PWY-7660', 'MetaCyc: PWY-6190', 'MetaCyc: PWY-6558', 'MetaCyc: PWY-7730', 'MetaCyc: PWY-7367', 'MetaCyc: PWY-1921', 'MetaCyc: PWY-6848', 'MetaCyc: PWY-6415', 'MetaCyc: PWY-8143', 'MetaCyc: PWY-7769', 'MetaCyc: PWY-7712', 'MetaCyc: PWY-7599', 'MetaCyc: PWY-7002', 'MetaCyc: PWY-7352', 'MetaCyc: PWY-7713', 'MetaCyc: PWY-6322', 'MetaCyc: PWY-7982', 'MetaCyc: PWY-7521', 'MetaCyc: PWY-8058',…	{'IPR007815', 'IPR016273'}	WP_021566672.1 MULTISPECIES: EreA family erythromycin esterase [Proteobacteria]		2254
562.23177.con.0024_53|562.23177			Cluster 28914	2928.0	True	False				False		False		False						{'IPR010854', 'IPR025543', 'IPR036275'}	EGI52589.1 putative inner membrane protein [Escherichia coli H299]		2255
562.23178.con.0047_3|562.23178			Cluster 19486	584.0	False	False			{soxR}	True	protein:plasmid:158870 Length: 120 # NCBI annotation: mercuric resistance operon coregulator # Family: family:all:71 # MgeID: mge:738 # MgeName: pU302L # Cross-refs: genbank:gi:58383320;genbank:GeneID:3259869	True		False	{'GO:0015694', 'GO:0046689', 'GO:0016020', 'GO:0045892', 'GO:0006355', 'GO:0003677', 'GO:0015097'}	{'GO:0016020'}	{'GO:0003677', 'GO:0015097'}	{'GO:0015694', 'GO:0046689', 'GO:0045892', 'GO:0006355'}	{'Reactome: R-DME-6782135', 'Reactome: R-HSA-2173795', 'Reactome: R-DME-5696395', 'Reactome: R-HSA-201451', 'Reactome: R-GGA-353303', 'MetaCyc: PWY-6689', 'KEGG: 00270', 'Reactome: R-HSA-5696395', 'Reactome: R-MMU-201451', 'Reactome: R-HSA-5696400', 'Reactome: R-MMU-5696395', 'Reactome: R-HSA-6782135', 'Reactome: R-HSA-379716', 'Reactome: R-MMU-6781823', 'Reactome: R-HSA-6781823', 'Reactome: R-SC…	{'IPR009061', 'IPR007746', 'IPR000551', 'IPR011797'}	STB30194.1 transcriptional regulator MerD [Citrobacter koseri]		2256
562.23189.con.0063_1|562.23189			Cluster 39153	16.0	False	False				False	protein:plasmid:19637 Length: 186 # NCBI annotation: resolvase for Tn21 # Family: family:all:7 # MgeID: mge:518 # MgeName: R100 # Cross-refs: genbank:acc:NP_052900;genbank:gi:9507569;genbank:GeneID:1263453	True		False	{'GO:0003677', 'GO:0000150', 'GO:0006310'}		{'GO:0003677', 'GO:0000150'}	{'GO:0006310'}	{'Reactome: R-CEL-3214842', 'MetaCyc: PWY-6027', 'Reactome: R-HSA-156711', 'Reactome: R-HSA-5693565', 'MetaCyc: PWY-7407', 'Reactome: R-MMU-72163', 'Reactome: R-MMU-350054', 'Reactome: R-XTR-174417', 'MetaCyc: PWY-7693', 'Reactome: R-MMU-174417', 'Reactome: R-HSA-1839117', 'Reactome: R-HSA-6785807', 'MetaCyc: PWY-7694', 'MetaCyc: PWY-5994', 'MetaCyc: PWY-2723', 'MetaCyc: PWY-8035', 'Reactome: R-R…	{'IPR009057', 'IPR006120'}	WP_072179517.1 MULTISPECIES: hypothetical protein [Enterobacteriaceae]	True	2257
562.23190.con.0013_101|562.23190	COG1444	R	Cluster 2149	2930.0	True	False				False		False		False	{'GO:0051392', 'GO:0008080', 'GO:0051391', 'GO:0002101', 'GO:0000049'}		{'GO:0008080', 'GO:0051392', 'GO:0000049'}	{'GO:0051391', 'GO:0002101'}	{'Reactome: R-HSA-8856828', 'Reactome: R-DME-2179392', 'MetaCyc: PWY-6027', 'Reactome: R-GGA-68689', 'Reactome: R-RNO-5696400', 'Reactome: R-BTA-73817', 'Reactome: R-MMU-381042', 'Reactome: R-GGA-2871796', 'Reactome: R-HSA-5693565', 'Reactome: R-DME-5610780', 'Reactome: R-HSA-9684325', 'Reactome: R-DDI-5358565', 'MetaCyc: PWY-3841', 'Reactome: R-HSA-1660514', 'MetaCyc: PWY-6659', 'Reactome: R-HSA…	{'IPR038321', 'IPR007807', 'IPR024914', 'IPR032672', 'IPR033442', 'IPR013562', 'IPR027417', 'IPR016181', 'IPR000182'}	WP_021580937.1 tRNA(Met) cytidine acetyltransferase [Escherichia coli]		2258
562.23197.con.0005_179|562.23197	COG0583	K	Cluster 12374	2929.0	True	False				False		False		False	{'GO:0006355', 'GO:0003700'}		{'GO:0003700'}	{'GO:0006355'}	{'Reactome: R-HSA-8856828', 'MetaCyc: PWY-6027', 'Reactome: R-CEL-3214842', 'Reactome: R-RNO-5696400', 'Reactome: R-HSA-5368598', 'Reactome: R-HSA-1660514', 'Reactome: R-HSA-5693565', 'Reactome: R-DME-5610780', 'MetaCyc: PWY-7693', 'Reactome: R-MMU-2468052', 'Reactome: R-DDI-174178', 'MetaCyc: PWY-6720', 'MetaCyc: PWY-5994', 'MetaCyc: PWY-2723', 'MetaCyc: PWY-8035', 'Reactome: R-XTR-110312', 'Rea…	{'IPR005119', 'IPR036390', 'IPR036388', 'IPR000847'}	WP_000062878.1 MULTISPECIES: transcriptional activator NhaR [Escherichia]		2259
562.23205.con.0120_1|562.23205	COG0732	V	Cluster 5769	33.0	False	False				False		False		False	{'GO:0003677', 'GO:0006304'}		{'GO:0003677'}	{'GO:0006304'}		{'IPR000055'}	WP_021561424.1 MULTISPECIES: restriction endonuclease subunit S [Enterobacteriaceae]		2260
562.23208.con.0025_38|562.23208			Cluster 17046	43.0	False	False				False	protein:vir:93581 Length: 256 # NCBI annotation: hypothetical protein # Family: family:all:67 # MgeID: mge:157 # MgeName: phi 4795 # Cross-refs: genbank:acc:YP_001449244;genbank:gi:157165992;interpro:IPR007538;uniprot:Q6H9Z5;genbank:GeneID:2641685	True		False						{'IPR025153'}	WP_080242997.1 ead/Ea22-like family protein [Salmonella enterica]		2261
562.23216.con.0005_22|562.23216	COG1737	K	Cluster 3249	2930.0	True	False				False	protein:plasmid:135007 Length: 252 # NCBI annotation: short-chain dehydrogenase/reductase SDR # Family: family:all:8 # MgeID: mge:1094 # MgeName: TM1040 mega plasmid # Cross-refs: genbank:gi:99078369;interpro:IPR002198;interpro:IPR002347;genbank:GeneID:4075567	True		False	{'GO:0055114', 'GO:0006355', 'GO:0003700', 'GO:1901135', 'GO:0097367'}		{'GO:0097367', 'GO:0003700'}	{'GO:0006355', 'GO:1901135', 'GO:0055114'}	{'Reactome: R-HSA-8856828', 'MetaCyc: PWY-6027', 'Reactome: R-CEL-3214842', 'Reactome: R-RNO-5696400', 'MetaCyc: PWY-6664', 'Reactome: R-HSA-5368598', 'MetaCyc: PWY-7862', 'MetaCyc: PWY-3841', 'Reactome: R-HSA-5693565', 'Reactome: R-DME-5610780', 'Reactome: R-HSA-1660514', 'MetaCyc: PWY-6659', 'MetaCyc: PWY-7693', 'Reactome: R-HSA-77111', 'MetaCyc: PWY-7605', 'Reactome: R-DDI-70171', 'MetaCyc: PW…	{'IPR022821', 'IPR001347', 'IPR002347', 'IPR035472', 'IPR000281', 'IPR009057', 'IPR036291', 'IPR036388'}	ABB67005.1 putative oxidoreductase [Shigella boydii Sb227]		2262
562.23223.con.0004_127|562.23223	COG2814	G	Cluster 7602	2928.0	True	False			{Chlor_Efflux_Pump, emrB, MFS_efflux, norA}	True	protein:plasmid:27060 Length: 397 # NCBI annotation: putative efflux protein # Family: family:all:10 # MgeID: mge:608 # MgeName: pSymB # Cross-refs: genbank:acc:NP_436611;genbank:gi:16263819;genbank:GeneID:1236362	True		False	{'GO:0055085', 'GO:0022857'}		{'GO:0022857'}	{'GO:0055085'}	{'Reactome: R-RNO-210991', 'Reactome: R-MMU-159418', 'Reactome: R-HSA-8856828', 'Reactome: R-XTR-352230', 'Reactome: R-MMU-5653890', 'Reactome: R-RNO-196757', 'MetaCyc: PWY-6369', 'Reactome: R-HSA-352230', 'Reactome: R-MMU-196819', 'Reactome: R-HSA-442660', 'Reactome: R-HSA-5662702', 'Reactome: R-DME-422356', 'Reactome: R-DME-196836', 'Reactome: R-CEL-428643', 'Reactome: R-HSA-5619070', 'Reactome…	{'IPR036259', 'IPR011701', 'IPR020846'}	WP_059338227.1 MFS transporter [Escherichia coli]		2263
562.23226.con.0074_1|562.23226			Cluster 19653	7.0	False	False				False		False		False							WP_015059030.1 MULTISPECIES: hypothetical protein [Bacteria]	True	2264
562.23226.con.0074_2|562.23226			Cluster 19749	7.0	False	False				False		False		False							WP_000481844.1 MULTISPECIES: hypothetical protein [Gammaproteobacteria]	True	2265
562.23229.con.0063_7|562.23229	COG1414	K	Cluster 15438	307.0	False	False				False	protein:plasmid:148426 Length: 283 # NCBI annotation: transcriptional regulator, IclR family # Family: family:all:77 # MgeID: mge:1130 # MgeName: pTT27 # Cross-refs: genbank:gi:55978431;genbank:GeneID:3169541	True		False	{'GO:0006355', 'GO:0003677'}		{'GO:0003677'}	{'GO:0006355'}	{'Reactome: R-HSA-8856828', 'MetaCyc: PWY-6027', 'Reactome: R-CEL-3214842', 'Reactome: R-RNO-5696400', 'Reactome: R-HSA-5368598', 'Reactome: R-HSA-1660514', 'Reactome: R-HSA-5693565', 'Reactome: R-DME-5610780', 'MetaCyc: PWY-7693', 'Reactome: R-MMU-2468052', 'Reactome: R-DDI-174178', 'MetaCyc: PWY-6720', 'MetaCyc: PWY-5994', 'MetaCyc: PWY-2723', 'MetaCyc: PWY-8035', 'Reactome: R-XTR-110312', 'Rea…	{'IPR036390', 'IPR005471', 'IPR014757', 'IPR029016', 'IPR036388'}	WP_012783979.1 IclR family transcriptional regulator [Escherichia coli]		2266
562.23237.con.0005_193|562.23237	COG3637	M	Cluster 21510	2927.0	True	False				False	protein:proph:161621 Length: 172 # NCBI annotation: Ail/OmpX-like protein # Family: family:all:582 # MgeID: mge:2096 # MgeName: prophinder:46219 # Cross-refs: genbank:acc:NP_459897;genbank:gi:16764282;genbank:GeneID:1252439	True		False	{'GO:0044384'}	{'GO:0044384'}			{'KEGG: 00540', 'Reactome: R-HSA-202733'}	{'IPR000758', 'IPR027385', 'IPR011250'}	WP_001340109.1 outer membrane protein OmpX [Escherichia coli]		2267
562.23237.con.0037_16|562.23237	COG0491	R	Cluster 15280	2927.0	True	False			{BCII, ClassB, L1, NDM-CcrA, SubclassB1, SubclassB3}	True	protein:proph:185230 Length: 263 # NCBI annotation: hydroxyacylglutathione hydrolase # Family: family:all:391 # MgeID: mge:2767 # MgeName: prophinder:47162 # Cross-refs: genbank:acc:YP_001502261;interpro:IPR001279;genbank:gi:157962227;genbank:GeneID:5662799	True		False	{'GO:0019243', 'GO:0004416'}		{'GO:0004416'}	{'GO:0019243'}	{'Reactome: R-RNO-5693571', 'KEGG: 00230', 'Reactome: R-BTA-1614517', 'KEGG: 00785', 'Reactome: R-RNO-6783310', 'KEGG: 00790', 'Reactome: R-MMU-72163', 'MetaCyc: PWY-7521', 'MetaCyc: PWY-6948', 'MetaCyc: PWY-8055', 'Reactome: R-DME-73856', 'Reactome: R-HSA-159231', 'Reactome: R-HSA-8868766', 'Reactome: R-HSA-2466712', 'MetaCyc: PWY-6415', 'Reactome: R-HSA-72163', 'MetaCyc: PWY-7807', 'MetaCyc: PW…	{'IPR001279', 'IPR036866', 'IPR032282', 'IPR017782', 'IPR035680'}	WP_097450571.1 hydroxyacylglutathione hydrolase [Escherichia coli]		2268
562.23245.con.0012_107|562.23245	COG5566	K	Cluster 27880	98.0	False	False				False	protein:proph:161702 Length: 115 # NCBI annotation: putative cytoplasmic protein # Family: family:all:613 # MgeID: mge:2098 # MgeName: prophinder:46223 # Cross-refs: genbank:acc:NP_463084;genbank:gi:39546392;genbank:GeneID:1255745	True		False					{'Reactome: R-CEL-3214842', 'MetaCyc: PWY-6027', 'Reactome: R-HSA-156711', 'Reactome: R-HSA-5693565', 'MetaCyc: PWY-7407', 'Reactome: R-MMU-72163', 'Reactome: R-MMU-350054', 'Reactome: R-XTR-174417', 'MetaCyc: PWY-7693', 'Reactome: R-MMU-174417', 'Reactome: R-HSA-1839117', 'Reactome: R-HSA-6785807', 'MetaCyc: PWY-7694', 'MetaCyc: PWY-5994', 'MetaCyc: PWY-2723', 'MetaCyc: PWY-8035', 'Reactome: R-R…	{'IPR009057', 'IPR014875'}	WP_032226483.1 DNA-binding protein [Escherichia coli]		2269
562.23248.con.0019_58|562.23248	COG0732	V	Cluster 6443	26.0	False	False				False		False		False	{'GO:0003677', 'GO:0006304'}		{'GO:0003677'}	{'GO:0006304'}		{'IPR000055'}	WP_094310829.1 MULTISPECIES: restriction endonuclease subunit S [Enterobacteriaceae]		2270
562.23248.con.0036_8|562.23248			Cluster 37122	42.0	False	False				False	protein:plasmid:151002 Length: 59 # NCBI annotation: CcgAI protein # Family: family:all:4589 # MgeID: mge:977 # MgeName: pMUR050 # Cross-refs: genbank:gi:113706793;genbank:GeneID:3861226	True		False							WP_040223426.1 MULTISPECIES: hypothetical protein [Enterobacteriaceae]	True	2271
562.23255.con.0022_85|562.23255			Cluster 5859	8.0	False	False				False		False		False						{'IPR039444'}	WP_023156640.1 SIR2 family protein [Escherichia coli]		2272
562.23255.con.0062_8|562.23255	COG0294	H	Cluster 12166	854.0	False	True	sul1	3000410.0		False	protein:plasmid:19632 Length: 288 # NCBI annotation: dihydropteroate synthetase typeI # Family: family:all:215 # MgeID: mge:518 # MgeName: R100 # Cross-refs: genbank:acc:NP_052895;genbank:gi:9507564;genbank:GeneID:1263474	True	gb|AEJ33969.1|sul1 [Vibrio fluvialis]	True	{'GO:0044237', 'GO:0042558', 'GO:0004156', 'GO:0009396'}		{'GO:0004156'}	{'GO:0044237', 'GO:0042558', 'GO:0009396'}	{'MetaCyc: PWY-5301', 'Reactome: R-RNO-156581', 'MetaCyc: PWY-8036', 'MetaCyc: PWY-7161', 'KEGG: 00790', 'MetaCyc: PWY-3841', 'MetaCyc: PWY-7784', 'MetaCyc: PWY-5729', 'MetaCyc: PWY-7631', 'MetaCyc: PWY-6795', 'MetaCyc: PWY-7151', 'MetaCyc: PWY-5748', 'MetaCyc: PWY-5305', 'Reactome: R-HSA-196741', 'MetaCyc: PWY-7668', 'MetaCyc: PWY-8047', 'MetaCyc: PWY-7325', 'MetaCyc: PWY-5765', 'MetaCyc: PWY-80…	{'IPR006390', 'IPR000489', 'IPR011005'}	WP_001336346.1 MULTISPECIES: sulfonamide-resistant dihydropteroate synthase Sul1 [Gammaproteobacteria]		2273
562.23256.con.0011_109|562.23256	COG2226	H	Cluster 10859	2926.0	True	False			{16S_rRNA_methyltrans, Erm23S_rRNA_methyltrans, ArmA_Rmt}	True		False		False	{'GO:0008168'}		{'GO:0008168'}		{'MetaCyc: PWY-5301', 'MetaCyc: PWY-6027', 'MetaCyc: PWY-7091', 'MetaCyc: PWY-8007', 'Reactome: R-BTA-71288', 'Reactome: R-DRE-71288', 'MetaCyc: PWY-7161', 'Reactome: R-HSA-9684325', 'MetaCyc: PWY-7407', 'MetaCyc: PWY-6659', 'MetaCyc: PWY-5818', 'MetaCyc: PWY-5110', 'MetaCyc: PWY-7701', 'MetaCyc: PWY-7693', 'MetaCyc: PWY-6906', 'MetaCyc: PWY-7397', 'MetaCyc: PWY-7605', 'Reactome: R-HSA-197264', '…	{'IPR013216', 'IPR029063'}	WP_000211711.1 MULTISPECIES: SAM-dependent methyltransferase [Escherichia]		2274
562.23264.con.0029_25|562.23264	COG4753	T	Cluster 13180	507.0	False	False			{marA}	True	protein:plasmid:25178 Length: 269 # NCBI annotation: transcriptional activator of virulence loci # Family: family:all:553 # MgeID: mge:604 # MgeName: pWR501 # Cross-refs: genbank:acc:NP_085206;genbank:gi:13448990;genbank:GeneID:876428	True		False	{'GO:0006355', 'GO:0043565', 'GO:0003700'}		{'GO:0043565', 'GO:0003700'}	{'GO:0006355'}	{'Reactome: R-CEL-3214842', 'MetaCyc: PWY-6027', 'Reactome: R-HSA-156711', 'Reactome: R-HSA-5693565', 'MetaCyc: PWY-7407', 'Reactome: R-MMU-72163', 'Reactome: R-MMU-350054', 'Reactome: R-XTR-174417', 'MetaCyc: PWY-7693', 'Reactome: R-MMU-174417', 'Reactome: R-HSA-1839117', 'Reactome: R-HSA-6785807', 'MetaCyc: PWY-7694', 'MetaCyc: PWY-5994', 'MetaCyc: PWY-2723', 'MetaCyc: PWY-8035', 'Reactome: R-R…	{'IPR009057', 'IPR018062', 'IPR018060', 'IPR020449'}	EHP63452.1 hypothetical protein HMPREF0986_04514 [Escherichia coli 4_1_47FAA]	True	2276
562.23264.con.0029_4|562.23264			Cluster 22309	106.0	False	False				False	protein:plasmid:19508 Length: 288 # NCBI annotation: transposase # Family: family:all:3 # MgeID: mge:516 # MgeName: F # Cross-refs: genbank:acc:NP_061381;genbank:gi:9507715;genbank:GeneID:1263587	True		False	{'GO:0032196'}			{'GO:0032196'}	{'MetaCyc: PWY-7884'}	{'IPR038965', 'IPR025948'}	SPW62065.1 IS3 element transposase [Escherichia coli]		2275
562.23273.con.0024_18|562.23273			Cluster 34172	4.0	False	False				False		False		False							AHM43618.1 membrane protein [Escherichia coli]		2277
562.23273.con.0024_66|562.23273			Cluster 12110	51.0	False	False				False	protein:vir:3249 Length: 207 # NCBI annotation: hypothetical protein # Family: family:all:67 # MgeID: mge:66 # MgeName: 933W # Cross-refs: genbank:acc:NP_049465;genbank:gi:9632471;genbank:GeneID:1261970	True		False						{'IPR007539'}	WP_104722848.1 DUF551 domain-containing protein [Escherichia coli]	True	2278
562.23273.con.0024_74|562.23273			Cluster 30125	4.0	False	False				False		False		False							WP_097477795.1 hypothetical protein [Escherichia coli]	True	2279
562.23273.con.0086_3|562.23273			Cluster 21900	7.0	False	False				False	protein:proph:163820 Length: 175 # NCBI annotation: tail fiber assembly protein # Family: family:all:58 # MgeID: mge:2156 # MgeName: prophinder:44195 # Cross-refs: genbank:acc:YP_001462160;genbank:gi:157156821;genbank:GeneID:5586796	True		False						{'IPR003458'}	CUA15868.1 tail fiber assembly protein [Escherichia coli]		2280
562.23275.con.0056_5|562.23275			Cluster 30584	317.0	False	False				False		False		False							WP_012372826.1 hypothetical protein [Escherichia coli]	True	2281
562.23282.con.0060_8|562.23282			Cluster 32288	57.0	False	False				False	protein:plasmid:16963 Length: 79 # NCBI annotation: CcgEIII # Family: family:all:6084 # MgeID: mge:409 # MgeName: R46 # Cross-refs: genbank:acc:NP_511213;genbank:gi:17530615;genbank:GeneID:1263141	True		False							WP_029402656.1 MULTISPECIES: hypothetical protein [Enterobacteriaceae]	True	2282
562.23284.con.0099_1|562.23284	COG4644	L	Cluster 14996	13.0	False	False				False	protein:plasmid:117840 Length: 325 # NCBI annotation: hypothetical protein # Family: family:all:7 # MgeID: mge:946 # MgeName: pSC138 # Cross-refs: genbank:gi:60115530;genbank:GeneID:3283487	True		False							AVX51340.1 hypothetical protein (plasmid) [Escherichia coli]	True	2283
562.23286.con.0018_38|562.23286			Cluster 16210	48.0	False	False				False	protein:vir:95333 Length: 191 # NCBI annotation: eae-like protein # Family: family:all:67 # MgeID: mge:1564 # MgeName: phiV10 # Cross-refs: genbank:acc:YP_512301;genbank:gi:89152462;genbank:GeneID:3953002	True		False						{'IPR025153'}	WP_023154014.1 MULTISPECIES: ead/Ea22-like family protein [Enterobacteriaceae]		2284
562.23286.con.0020_1|562.23286	COG1918	P	Cluster 30586	2928.0	True	False				False	protein:plasmid:131219 Length: 117 # NCBI annotation: Fe2+ transport system protein B-like protein # Family: family:all:7747 # MgeID: mge:1936 # MgeName: pRSPA01 # Cross-refs: genbank:gi:146279856;genbank:GeneID:5085402	True		False	{'GO:0046914'}		{'GO:0046914'}		{'KEGG: 00780', 'MetaCyc: PWY-3961', 'KEGG: 01100', 'KEGG: 00770'}	{'IPR008988', 'IPR007167', 'IPR038157'}	2LX9_A Chain A, Solution Structure of Escherichia coli Ferrous Iron transport protein A (FeoA)		2285
562.23288.con.0004_150|562.23288			Cluster 6342	19.0	False	False				False		False		False							ORT72786.1 hypothetical protein BO998_17300 [Citrobacter werkmanii]	True	2286
562.23288.con.0004_155|562.23288	COG1196	D	Cluster 997	19.0	False	False				False	protein:plasmid:15825 Length: 873 # NCBI annotation: hypothetical protein # Family: family:all:3598 # MgeID: mge:365 # MgeName: pB171 # Cross-refs: genbank:acc:NP_053136;genbank:gi:10955424;genbank:GeneID:1238668	True		False	{'GO:0003824'}		{'GO:0003824'}		{'Reactome: R-HSA-8856828', 'Reactome: R-DME-2179392', 'MetaCyc: PWY-6027', 'Reactome: R-GGA-68689', 'Reactome: R-RNO-5696400', 'Reactome: R-BTA-73817', 'Reactome: R-MMU-381042', 'Reactome: R-GGA-2871796', 'Reactome: R-HSA-5693565', 'Reactome: R-DME-5610780', 'Reactome: R-DDI-5358565', 'Reactome: R-HSA-9684325', 'MetaCyc: PWY-3841', 'Reactome: R-HSA-1660514', 'MetaCyc: PWY-6659', 'Reactome: R-HSA…	{'IPR027417', 'IPR016195'}	WP_085049161.1 histidinol-phosphatase [Citrobacter werkmanii]		2287
562.23288.con.0016_6|562.23288	COG2337	T	Cluster 28325	993.0	False	False				False	protein:plasmid:126529 Length: 116 # NCBI annotation: transcriptional modulator of MazE/toxin, MazF # Family: family:all:532 # MgeID: mge:1925 # MgeName: pBVIE03 # Cross-refs: genbank:gi:134288045;interpro:IPR003477;genbank:GeneID:4947836	True		False	{'GO:0003677'}		{'GO:0003677'}			{'IPR003477', 'IPR011067'}	WP_001349992.1 type II toxin-antitoxin system ChpB family toxin [Escherichia coli]		2288
562.23288.con.0034_22|562.23288			Cluster 28792	1481.0	False	False				False	protein:plasmid:158877 Length: 70 # NCBI annotation: modulator of Hok protein # Family: family:all:1814 # MgeID: mge:738 # MgeName: pU302L # Cross-refs: genbank:gi:58383262;genbank:GeneID:3259882	True		False						{'IPR035273'}	WP_013279294.1 modulator of Hok protein [Escherichia coli]		2289
562.23304.con.0006_212|562.23304	COG0629	L	Cluster 20416	2929.0	True	False				False	protein:vir:101347 Length: 162 # NCBI annotation: Ssb # Family: family:all:26 # MgeID: mge:1512 # MgeName: P1 # Cross-refs: genbank:acc:YP_006485;genbank:gi:46401640;genbank:GeneID:2777409	True		False	{'GO:0006260', 'GO:0003697'}		{'GO:0003697'}	{'GO:0006260'}	{'MetaCyc: PWY-5301', 'Reactome: R-GGA-6782210', 'Reactome: R-HSA-6796648', 'Reactome: R-GGA-68689', 'Reactome: R-RNO-5696400', 'Reactome: R-HSA-3108214', 'Reactome: R-SCE-5358565', 'MetaCyc: PWY-7161', 'Reactome: R-MMU-381042', 'Reactome: R-DDI-76042', 'Reactome: R-DDI-5358565', 'Reactome: R-MMU-72163', 'Reactome: R-HSA-975957', 'Reactome: R-RNO-1799339', 'Reactome: R-HSA-113507', 'Reactome: R-X…	{'IPR012340', 'IPR000424', 'IPR011344'}	WP_016190697.1 single-stranded DNA-binding protein [Erwinia tracheiphila]		2290
562.23305.con.0020_38|562.23305	COG1140	C	Cluster 3786	2931.0	True	False				False	protein:plasmid:149415 Length: 516 # NCBI annotation: respiratory nitrate reductase subunit # Family: family:all:1206 # MgeID: mge:823 # MgeName: pHG1 # Cross-refs: genbank:gi:38637932;genbank:GeneID:2656498	True		False	{'GO:0008940', 'GO:0042126', 'GO:0055114', 'GO:0009325'}	{'GO:0009325'}	{'GO:0008940'}	{'GO:0042126', 'GO:0055114'}	{'MetaCyc: PWY-7279', 'MetaCyc: PWY-5104', 'MetaCyc: PWY-6050', 'KEGG: 00195', 'MetaCyc: PWY-1361', 'KEGG: 00790', 'MetaCyc: PWY-1881', 'MetaCyc: PWY-5600', 'MetaCyc: PWY-7784', 'MetaCyc: PWY-7866', 'MetaCyc: PWY-6759', 'MetaCyc: PWY-6948', 'KEGG: 00640', 'MetaCyc: PWY-6694', 'KEGG: 00020', 'MetaCyc: PWY-4302', 'Reactome: R-RNO-611105', 'Reactome: R-DDI-71403', 'Reactome: R-HSA-909733', 'MetaCyc:…	{'IPR029263', 'IPR017896', 'IPR006547', 'IPR038262'}	WP_000702647.1 nitrate reductase A subunit beta [Escherichia coli]		2291
562.23311.con.0005_65|562.23311	COG0644	C	Cluster 7223	2930.0	True	False				False		False		False	{'GO:0071949'}		{'GO:0071949'}		{'MetaCyc: PWY-8002', 'MetaCyc: PWY-5301', 'Reactome: R-HSA-70895', 'Reactome: R-CEL-3214842', 'MetaCyc: PWY-6050', 'Reactome: R-MMU-8876198', 'MetaCyc: PWY-5418', 'MetaCyc: PWY-7161', 'MetaCyc: PWY-7407', 'Reactome: R-HSA-1222541', 'MetaCyc: PWY-6659', 'MetaCyc: PWY-6200', 'MetaCyc: PWY-5818', 'MetaCyc: PWY-7693', 'MetaCyc: PWY-7605', 'Reactome: R-DDI-379397', 'MetaCyc: PWY-7015', 'MetaCyc: PWY-…	{'IPR036188', 'IPR002938'}	WP_001532050.1 FAD-binding protein [Escherichia coli]		2292
562.23314.con.0001_31|562.23314	COG3299	S	Cluster 7306	15.0	False	False				False	protein:proph:175112 Length: 399 # NCBI annotation: putative bacteriophage protein # Family: family:all:314 # MgeID: mge:2474 # MgeName: prophinder:45435 # Cross-refs: genbank:acc:NP_805638;genbank:gi:29142296;genbank:GeneID:1068875	True		False						{'IPR006949'}	WP_046659630.1 MULTISPECIES: bacteriophage protein [Enterobacteriaceae]		2293
562.23314.con.0002_294|562.23314			Cluster 37592	4.0	False	False				False	protein:plasmid:25353 Length: 55 # NCBI annotation: IS1-cat orf # Family: family:all:98 # MgeID: mge:604 # MgeName: pWR501 # Cross-refs: genbank:acc:NP_085381;genbank:gi:13449165;genbank:GeneID:876604	True		False							WP_001273755.1 MULTISPECIES: galactarate dehydratase [Escherichia]		2294
562.23320.con.0014_1|562.23320	COG0765	E	Cluster 17423	2921.0	True	False				False	protein:plasmid:151565 Length: 220 # NCBI annotation: polar amino acid ABC transporter, inner membrane subunit # Family: family:all:75 # MgeID: mge:1988 # MgeName: pOANT04 # Cross-refs: genbank:gi:153012128;interpro:IPR000515;interpro:IPR010065;genbank:GeneID:5383330	True		False	{'GO:0022857', 'GO:0043190', 'GO:0016020', 'GO:0055085', 'GO:0071705', 'GO:0016021'}	{'GO:0016021', 'GO:0043190', 'GO:0016020'}	{'GO:0022857'}	{'GO:0055085', 'GO:0071705'}	{'Reactome: R-CEL-210991', 'MetaCyc: PWY-5668', 'MetaCyc: PWY-6804', 'Reactome: R-CEL-4641262', 'MetaCyc: PWY-6385', 'MetaCyc: PWY-7819', 'MetaCyc: PWY-7816', 'MetaCyc: PWY-7818', 'MetaCyc: PWY-7820', 'Reactome: R-CEL-445355', 'Reactome: R-HSA-1222538', 'MetaCyc: PWY-7815', 'MetaCyc: PWY-6350', 'MetaCyc: PWY-7404', 'MetaCyc: PWY-7817', 'MetaCyc: PWY-7981', 'MetaCyc: PWY-7467'}	{'IPR035906', 'IPR043429', 'IPR010065', 'IPR000515'}	WP_089046668.1 cystine ABC transporter permease [Escherichia coli]		2295
562.23321.con.0047_1|562.23321	COG4214	G	Cluster 7444	2925.0	True	False				False	protein:plasmid:22649 Length: 398 # NCBI annotation: PROBABLE XYLOSE TRANSMEMBRANE ABC TRANSPORTER PROTEIN # Family: family:all:23 # MgeID: mge:570 # MgeName: pGMI1000MP # Cross-refs: genbank:acc:NP_523194;genbank:gi:17549854;genbank:GeneID:1223947	True		False	{'GO:0016021', 'GO:0055085', 'GO:0022857'}	{'GO:0016021'}	{'GO:0022857'}	{'GO:0055085'}		{'IPR001851'}	WP_001575427.1 sugar ABC transporter permease [Escherichia coli]		2296
562.23330.con.0009_143|562.23330	COG1742	S	Cluster 28212	2918.0	True	False				False	protein:plasmid:22289 Length: 110 # NCBI annotation: hypothetical protein # Family: family:all:2533 # MgeID: mge:570 # MgeName: pGMI1000MP # Cross-refs: genbank:acc:NP_522834;genbank:gi:17549494;genbank:GeneID:1223587	True		False	{'GO:0016020'}	{'GO:0016020'}				{'IPR003844'}	WP_000598291.1 YnfA family protein [Escherichia coli]		2297
562.23330.con.0025_58|562.23330	COG1479	S	Cluster 9544	5.0	False	False				False		False		False						{'IPR004919'}	WP_029392307.1 MULTISPECIES: DUF262 domain-containing protein [Enterobacteriaceae]	True	2298
562.23343.con.0002_342|562.23343			Cluster 6973	420.0	False	False				False		False		False							WP_021535715.1 hypothetical protein [Escherichia coli]	True	2299
562.23348.con.0031_1|562.23348	COG0637	R	Cluster 17503	2925.0	True	False				False		False		False	{'GO:0016787'}		{'GO:0016787'}		{'MetaCyc: PWY-7091', 'Reactome: R-HSA-6796648', 'Reactome: R-BTA-73817', 'Reactome: R-HSA-73817', 'Reactome: R-HSA-5693565', 'MetaCyc: PWY-5269', 'Reactome: R-MMU-4085001', 'MetaCyc: PWY-5818', 'MetaCyc: PWY-6906', 'Reactome: R-HSA-113418', 'MetaCyc: PWY-6160', 'MetaCyc: PWY-6720', 'KEGG: 00740', 'MetaCyc: PWY-6908', 'Reactome: R-DDI-74259', 'Reactome: R-SPO-1483213', 'MetaCyc: PWY-7057', 'MetaC…	{'IPR023214', 'IPR036412', 'IPR041492', 'IPR023198', 'IPR006439'}	WP_000078061.1 6-phosphogluconate phosphatase [Escherichia coli]		2300
562.23354.con.0015_1|562.23354			Cluster 32789	404.0	False	False				False	protein:proph:163908 Length: 60 # NCBI annotation: hypothetical protein # Family: family:all:23825 # MgeID: mge:2158 # MgeName: prophinder:44205 # Cross-refs: genbank:acc:YP_001463321;genbank:gi:157156769;genbank:GeneID:5590545	True		False							KUT11291.1 hypothetical protein AWE83_14665 [Escherichia coli]	True	2301
562.23355.con.0039_30|562.23355			Cluster 35673	17.0	False	False				False		False		False							WP_077520737.1 hypothetical protein [Escherichia coli]	True	2302
562.23366.con.0007_145|562.23366	COG1961	L	Cluster 17643	79.0	False	False				False	protein:plasmid:20318 Length: 211 # NCBI annotation: resolvase # Family: family:all:7 # MgeID: mge:560 # MgeName: pWW0 # Cross-refs: genbank:acc:NP_542797;swissprot:trembl:q8vmq2;genbank:gi:18150860;goa:Q8VMQ2;interpro:IPR006118;interpro:IPR006119;uniprot:Q8VMQ2;genbank:GeneID:1218792	True		False	{'GO:0003677', 'GO:0000150', 'GO:0006310'}		{'GO:0003677', 'GO:0000150'}	{'GO:0006310'}	{'MetaCyc: PWY-6689'}	{'IPR036162', 'IPR006119', 'IPR006118'}	SAD27837.1 putative resolvase [Enterobacter cloacae]		2303
562.23367.con.0019_87|562.23367			Cluster 37290	5.0	False	False				False		False		False							OXV44621.1 hypothetical protein CDL58_12575, partial [Escherichia coli]	True	2304
562.23367.con.0021_2|562.23367			Cluster 508	5.0	False	False				False		False		False							WP_000742272.1 hypothetical protein [Escherichia coli]	True	2305
562.23367.con.0021_3|562.23367			Cluster 24200	5.0	False	False			{vanR}	True		False		False	{'GO:0000160'}			{'GO:0000160'}	{'Reactome: R-SPO-3371568', 'MetaCyc: PWY-5491', 'MetaCyc: PWY-46', 'KEGG: 00230', 'MetaCyc: PWY-6686', 'MetaCyc: PWY-7878', 'MetaCyc: PWY-8176', 'MetaCyc: PWY-6456', 'KEGG: 00330', 'MetaCyc: PWY-7881', 'MetaCyc: PWY-7863', 'MetaCyc: PWY-6575', 'MetaCyc: PWY-6689', 'MetaCyc: PWY-6368', 'MetaCyc: PWY-6366', 'MetaCyc: PWY-7366', 'MetaCyc: PWY-7119', 'MetaCyc: PWY-6352', 'Reactome: R-DDI-418555', 'R…	{'IPR001789', 'IPR011006'}	WP_000698455.1 MULTISPECIES: response regulator [Enterobacteriaceae]		2306
562.23367.con.0021_4|562.23367			Cluster 7788	5.0	False	False			{vanR}	True		False		False	{'GO:0000160'}			{'GO:0000160'}	{'Reactome: R-MMU-159418', 'MetaCyc: PWY-5301', 'Reactome: R-DDI-112311', 'MetaCyc: PWY-6027', 'MetaCyc: PWY-7091', 'MetaCyc: PWY-7420', 'MetaCyc: PWY-7161', 'Reactome: R-RNO-418346', 'MetaCyc: PWY-3841', 'Reactome: R-HSA-211945', 'MetaCyc: PWY-7407', 'MetaCyc: PWY-5800', 'MetaCyc: PWY-6659', 'Reactome: R-MMU-4085001', 'MetaCyc: PWY-5818', 'MetaCyc: PWY-7693', 'MetaCyc: PWY-7623', 'MetaCyc: PWY-6…	{'IPR001789', 'IPR011006', 'IPR029058'}	WP_000590615.1 response regulator [Escherichia coli]		2307
562.23367.con.0021_5|562.23367			Cluster 11111	5.0	False	False				False		False		False							WP_000220589.1 hypothetical protein [Escherichia coli]	True	2308
562.23367.con.0030_45|562.23367	COG0596	R	Cluster 4502	164.0	False	True	SAT-2	3002895.0	{AAC3-I, AAC6-I}	True	protein:plasmid:117760 Length: 359 # NCBI annotation: streptothricin acetyl-transferase # Family: family:all:49 # MgeID: mge:946 # MgeName: pSC138 # Cross-refs: genbank:gi:60115570;genbank:GeneID:3283407	True		False	{'GO:0008080'}		{'GO:0008080'}		{'Reactome: R-MMU-159418', 'MetaCyc: PWY-5301', 'Reactome: R-DDI-112311', 'MetaCyc: PWY-6027', 'MetaCyc: PWY-7091', 'MetaCyc: PWY-7420', 'MetaCyc: PWY-7161', 'Reactome: R-RNO-418346', 'Reactome: R-HSA-5693565', 'Reactome: R-HSA-211945', 'MetaCyc: PWY-3841', 'MetaCyc: PWY-7407', 'MetaCyc: PWY-5800', 'Reactome: R-MMU-350054', 'MetaCyc: PWY-6659', 'Reactome: R-MMU-4085001', 'MetaCyc: PWY-5818', 'Met…	{'IPR029058', 'IPR008125', 'IPR016181', 'IPR000073', 'IPR000182'}	WP_071846307.1 bifunctional putative esterase EstX/streptothricin N-acetyltransferase Sat1 [Escherichia coli]		2309
562.23367.con.0050_15|562.23367			Cluster 36408	35.0	False	False				False		False		False							EFJ80932.1 hypothetical protein HMPREF9534_03019 [Escherichia coli MS 69-1]	True	2310
562.23367.con.0072_2|562.23367			Cluster 22310	68.0	False	False				False	protein:plasmid:119665 Length: 138 # NCBI annotation: hypothetical protein # Family: family:all:2560 # MgeID: mge:774 # MgeName: pUTI89 # Cross-refs: genbank:gi:91206265;genbank:GeneID:3996387	True		False	{'GO:0006355', 'GO:0003700'}		{'GO:0003700'}	{'GO:0006355'}		{'IPR000524'}	AUX04699.1 hypothetical protein FORC42_4425 [Escherichia coli]	True	2311
562.23368.con.0002_232|562.23368			Cluster 27983	47.0	False	False				False		False		False							SQM28678.1 Uncharacterised protein [Escherichia coli]	True	2312
562.23375.con.0002_293|562.23375	COG2066	E	Cluster 5771	2912.0	True	False			{CTXM}	True	protein:plasmid:22157 Length: 304 # NCBI annotation: glutaminase # Family: family:all:22090 # MgeID: mge:570 # MgeName: pGMI1000MP # Cross-refs: genbank:acc:NP_522704;genbank:gi:17549364;genbank:GeneID:1223455	True		False	{'GO:0016491', 'GO:0004359', 'GO:0006541', 'GO:0055114'}		{'GO:0016491', 'GO:0004359'}	{'GO:0006541', 'GO:0055114'}	{'MetaCyc: PWY-5301', 'MetaCyc: PWY-5104', 'Reactome: R-HSA-70895', 'MetaCyc: PWY-6027', 'MetaCyc: PWY-5789', 'MetaCyc: PWY-7407', 'MetaCyc: PWY-6659', 'MetaCyc: PWY-5818', 'MetaCyc: PWY-7693', 'MetaCyc: PWY-6654', 'MetaCyc: PWY-7303', 'MetaCyc: PWY-7694', 'Reactome: R-CEL-173599', 'MetaCyc: PWY-5994', 'MetaCyc: PWY-8035', 'Reactome: R-RNO-77305', 'MetaCyc: PWY-699', 'MetaCyc: PWY-5782', 'MetaCyc…	{'IPR008927', 'IPR013118', 'IPR015868', 'IPR013328', 'IPR012338'}	WP_077744806.1 glutaminase [Escherichia coli]		2313
562.23375.con.0004_64|562.23375	COG2885	M	Cluster 8799	2929.0	True	False				False	protein:plasmid:25078 Length: 342 # NCBI annotation: outer membrane protein A # Family: family:all:280 # MgeID: mge:603 # MgeName: pMR-1 # Cross-refs: genbank:acc:NP_720438;genbank:gi:24376330;genbank:GeneID:1172537	True		False	{'GO:0016021', 'GO:0015288', 'GO:0009279'}	{'GO:0016021', 'GO:0009279'}	{'GO:0015288'}		{'KEGG: 00540', 'Reactome: R-HSA-202733', 'MetaCyc: PWY-101'}	{'IPR006690', 'IPR036737', 'IPR006664', 'IPR006665', 'IPR002368', 'IPR000498', 'IPR011250'}	AGY83893.1 membrane protein [Escherichia coli JJ1886]		2314
562.23379.con.0010_52|562.23379	COG0477	G	Cluster 4186	2924.0	True	False			{Chlor_Efflux_Pump, emrB, MFS_efflux, TetA}	True	protein:plasmid:134219 Length: 453 # NCBI annotation: probable proline/ betaine transporter, MFS superfamily # Family: family:all:10 # MgeID: mge:762 # MgeName: pRHL2 # Cross-refs: genbank:gi:111026499;genbank:GeneID:4226418	True		False	{'GO:0016021', 'GO:0055085', 'GO:0022857'}	{'GO:0016021'}	{'GO:0022857'}	{'GO:0055085'}	{'Reactome: R-RNO-210991', 'Reactome: R-MMU-159418', 'Reactome: R-HSA-8856828', 'Reactome: R-XTR-352230', 'Reactome: R-MMU-5653890', 'Reactome: R-RNO-196757', 'MetaCyc: PWY-6369', 'Reactome: R-HSA-352230', 'Reactome: R-MMU-196819', 'Reactome: R-HSA-442660', 'Reactome: R-HSA-5662702', 'Reactome: R-DME-422356', 'Reactome: R-DME-196836', 'Reactome: R-CEL-428643', 'Reactome: R-HSA-5619070', 'Reactome…	{'IPR036259', 'IPR004736', 'IPR020846', 'IPR005829', 'IPR036292', 'IPR005828', 'IPR015041'}	WP_087890363.1 proline/glycine betaine transporter ProP [Escherichia coli]		2315
562.23384.con.0082_1|562.23384			Cluster 39432	7.0	False	False				False	protein:plasmid:117444 Length: 116 # NCBI annotation: putative transposase # Family: family:all:87 # MgeID: mge:818 # MgeName: pO86A1 # Cross-refs: genbank:gi:116006810;genbank:GeneID:4364239	True		False							AUO33809.1 putative transposase [Escherichia coli]		2316
562.23385.con.0005_162|562.23385			Cluster 32971	126.0	False	False				False		False		False						{'IPR021682'}			2317
562.23387.con.0023_64|562.23387			Cluster 16073	62.0	False	False				False	protein:proph:177676 Length: 315 # NCBI annotation: hypothetical protein # Family: family:all:67 # MgeID: mge:2543 # MgeName: prophinder:42713 # Cross-refs: genbank:acc:NP_288698;genbank:gi:15802671;genbank:GeneID:957042	True		False						{'IPR025153'}	WP_077252015.1 hypothetical protein [Escherichia coli]	True	2318
562.23391.con.0033_32|562.23391	COG2084	I	Cluster 12740	2915.0	True	False				False	protein:plasmid:144341 Length: 294 # NCBI annotation: 2-hydroxy-3-oxopropionate reductase # Family: family:all:237 # MgeID: mge:1969 # MgeName: pSMED01 # Cross-refs: genbank:gi:150376452;interpro:IPR002204;interpro:IPR006115;interpro:IPR006183;interpro:IPR006398;genbank:GeneID:5318885	True		False	{'GO:0016491', 'GO:0055114', 'GO:0008679', 'GO:0050661', 'GO:0046487', 'GO:0051287'}		{'GO:0016491', 'GO:0050661', 'GO:0008679', 'GO:0051287'}	{'GO:0046487', 'GO:0055114'}	{'MetaCyc: PWY-6027', 'MetaCyc: PWY-6664', 'MetaCyc: PWY-7862', 'MetaCyc: PWY-3841', 'MetaCyc: PWY-6659', 'MetaCyc: PWY-7693', 'Reactome: R-HSA-77111', 'MetaCyc: PWY-7605', 'Reactome: R-DDI-70171', 'MetaCyc: PWY-6654', 'MetaCyc: PWY-6160', 'MetaCyc: PWY-7341', 'MetaCyc: PWY-5994', 'MetaCyc: PWY-7057', 'MetaCyc: PWY-8035', 'KEGG: 00472', 'Reactome: R-RNO-77305', 'MetaCyc: PWY-8034', 'MetaCyc: PWY-…	{'IPR002204', 'IPR008927', 'IPR013328', 'IPR006115', 'IPR015815', 'IPR006398', 'IPR029154', 'IPR036291'}	WP_001522066.1 MULTISPECIES: 2-hydroxy-3-oxopropionate reductase [Enterobacteriaceae]		2319
562.23391.con.0045_15|562.23391	COG0232	F	Cluster 4553	25.0	False	False				False	protein:plasmid:135516 Length: 449 # NCBI annotation: hypothetical protein # Family: family:all:17227 # MgeID: mge:1838 # MgeName: pSbal01 # Cross-refs: genbank:gi:126090160;genbank:GeneID:4841183	True		False	{'GO:0006203', 'GO:0016793', 'GO:0000287', 'GO:0008832'}		{'GO:0016793', 'GO:0000287', 'GO:0008832'}	{'GO:0006203'}	{'MetaCyc: PWY-8176', 'KEGG: 00230', 'MetaCyc: PWY-7878', 'MetaCyc: PWY-6575', 'KEGG: 00790', 'Reactome: R-DME-4086398', 'MetaCyc: PWY-6368', 'Reactome: R-MMU-418457', 'Reactome: R-CFA-4086398', 'MetaCyc: PWY-6720', 'MetaCyc: PWY-8052', 'Reactome: R-HSA-909733', 'Reactome: R-MMU-111957', 'Reactome: R-MMU-2514859', 'Reactome: R-DME-418555', 'MetaCyc: PWY-7018', 'Reactome: R-CFA-2485179', 'MetaCyc:…	{'IPR026875', 'IPR020779', 'IPR003607', 'IPR006674', 'IPR006261', 'IPR023023'}	WP_000148486.1 MULTISPECIES: deoxyguanosinetriphosphate triphosphohydrolase family protein [Escherichia]		2320
562.23393.con.0016_1|562.23393			Cluster 40611	567.0	False	False				False		False		False									2321
562.23394.con.0001_485|562.23394	COG0246	G	Cluster 2326	2913.0	True	False				False		False		False	{'GO:0009026', 'GO:0016491', 'GO:0055114'}		{'GO:0009026', 'GO:0016491'}	{'GO:0055114'}	{'MetaCyc: PWY-6027', 'MetaCyc: PWY-6664', 'MetaCyc: PWY-7862', 'MetaCyc: PWY-3841', 'MetaCyc: PWY-6659', 'MetaCyc: PWY-7693', 'Reactome: R-HSA-77111', 'MetaCyc: PWY-7605', 'Reactome: R-DDI-70171', 'MetaCyc: PWY-6654', 'MetaCyc: PWY-6160', 'MetaCyc: PWY-7341', 'MetaCyc: PWY-5994', 'MetaCyc: PWY-7057', 'MetaCyc: PWY-8035', 'KEGG: 00472', 'Reactome: R-RNO-77305', 'MetaCyc: PWY-8034', 'MetaCyc: PWY-…	{'IPR008927', 'IPR013118', 'IPR013328', 'IPR013131', 'IPR023668', 'IPR036291'}	WP_001518609.1 tagaturonate reductase [Escherichia coli]		2322
562.23394.con.0044_5|562.23394	COG4974	L	Cluster 11615	118.0	False	False				False	protein:plasmid:30557 Length: 244 # NCBI annotation: Orf81 # Family: family:all:2 # MgeID: mge:689 # MgeName: pYVa127/90 # Cross-refs: genbank:acc:NP_783718;genbank:gi:28373036;genbank:GeneID:1239238	True		False	{'GO:0015074', 'GO:0003677', 'GO:0006310'}		{'GO:0003677'}	{'GO:0015074', 'GO:0006310'}	{'MetaCyc: PWY-8179', 'MetaCyc: PWY-8117', 'MetaCyc: PWY-6749', 'Reactome: R-SPO-4615885', 'MetaCyc: PWY-7735', 'MetaCyc: PWY-7127', 'Reactome: R-CEL-4615885', 'Reactome: R-HSA-4615885', 'Reactome: R-DDI-4615885', 'MetaCyc: PWY-6626', 'Reactome: R-MMU-4615885', 'Reactome: R-RNO-4615885', 'MetaCyc: PWY-7419', 'MetaCyc: PWY-7904', 'Reactome: R-SCE-4615885', 'MetaCyc: PWY-6955', 'MetaCyc: PWY-7888',…	{'IPR013762', 'IPR002104', 'IPR011010'}	WP_001547191.1 hypothetical protein [Escherichia coli]	True	2323
562.23395.con.0109_2|562.23395	COG2602	V	Cluster 12688	252.0	False	True	OXA-1	3001396.0	{blaR1, ClassD, mecR1}	True	protein:plasmid:148157 Length: 276 # NCBI annotation: OXA-1 # Family: family:all:691 # MgeID: mge:1138 # MgeName: pC15-1a # Cross-refs: genbank:gi:41056928;genbank:GeneID:2716479	True		False	{'GO:0017001', 'GO:0008658', 'GO:0008800'}		{'GO:0008658', 'GO:0008800'}	{'GO:0017001'}	{'MetaCyc: PWY-6032', 'MetaCyc: PWY-6314', 'MetaCyc: PWY-8075', 'MetaCyc: PWY-7702', 'MetaCyc: PWY-6027', 'MetaCyc: PWY-7050', 'MetaCyc: PWY-8084', 'MetaCyc: PWY-8036', 'MetaCyc: PWY-7407', 'MetaCyc: PWY-5903', 'MetaCyc: PWY-6471', 'MetaCyc: PWY-7521', 'MetaCyc: PWY-6948', 'MetaCyc: PWY-8166', 'MetaCyc: PWY-7693', 'MetaCyc: PWY-7470', 'Reactome: R-HSA-210500', 'MetaCyc: PWY-8055', 'MetaCyc: PWY-7…	{'IPR012338', 'IPR002137', 'IPR001460'}	ADI33309.1 beta-lactamase OXA-1, partial [Pseudomonas aeruginosa]		2324
562.23398.con.0009_44|562.23398	COG0327	S	Cluster 14151	2929.0	True	False				False		False		False					{'MetaCyc: PWY-6147', 'MetaCyc: PWY-6703', 'KEGG: 00790', 'MetaCyc: PWY-7852', 'KEGG: 01100', 'MetaCyc: PWY-7442', 'MetaCyc: PWY-6983', 'MetaCyc: PWY-5663'}	{'IPR036069', 'IPR002678'}	WP_074148743.1 type 2 GTP cyclohydrolase I [Escherichia coli]		2325
562.23404.con.0052_10|562.23404			Cluster 31991	20.0	False	False				False		False		False									2326
562.23404.con.0056_9|562.23404			Cluster 25738	12.0	False	False				False		False		False							WP_052921426.1 hypothetical protein [Escherichia coli]	True	2327
562.23408.con.0014_122|562.23408	COG1561	S	Cluster 8748	2930.0	True	False				False		False		False						{'IPR013551', 'IPR005229', 'IPR013527'}	OUR49419.1 yicC [Escherichia coli]		2328
562.23410.con.0040_10|562.23410			Cluster 16911	68.0	False	False				False	protein:plasmid:151057 Length: 208 # NCBI annotation: Fip # Family: family:all:2605 # MgeID: mge:977 # MgeName: pMUR050 # Cross-refs: genbank:gi:113706784;genbank:GeneID:4246801	True		False							AGH89158.1 FipA: fertility inhibition of IncP plasmids protein (plasmid) [uncultured bacterium]		2329
562.23416.con.0004_224|562.23416	COG3550	R	Cluster 4127	27.0	False	False				False	protein:plasmid:158302 Length: 429 # NCBI annotation: hypothetical protein # Family: family:all:366 # MgeID: mge:1997 # MgeName: pESA3 # Cross-refs: genbank:gi:156936662;interpro:IPR012893;interpro:IPR012894;genbank:GeneID:5552635	True		False					{'KEGG: 04151', 'KEGG: 05170', 'KEGG: 04714', 'KEGG: 05165', 'KEGG: 05163', 'KEGG: 04150', 'KEGG: 04926'}	{'IPR012893', 'IPR017508'}	CCG32013.1 HipA protein [Klebsiella aerogenes EA1509E]		2330
562.23416.con.0004_256|562.23416			Cluster 33822	48.0	False	False				False	protein:proph:160492 Length: 82 # NCBI annotation: hypothetical protein # Family: family:all:6407 # MgeID: mge:2066 # MgeName: prophinder:43828 # Cross-refs: genbank:acc:NP_930636;genbank:gi:37527292;genbank:GeneID:2803430	True		False	{'GO:0003677'}		{'GO:0003677'}		{'MetaCyc: PWY-6147', 'KEGG: 00910', 'Reactome: R-MMU-111465', 'KEGG: 00250', 'MetaCyc: PWY-8067', 'MetaCyc: PWY-7539', 'KEGG: 00270', 'MetaCyc: PWY-6749', 'MetaCyc: PWY-6502', 'Reactome: R-HSA-8940973', 'Reactome: R-HSA-6807505', 'Reactome: R-XTR-6807505', 'MetaCyc: PWY-7821', 'Reactome: R-MMU-6807505', 'Reactome: R-HSA-9018519', 'Reactome: R-HSA-210744', 'MetaCyc: PWY-8013', 'Reactome: R-HSA-18…	{'IPR001387', 'IPR010982'}	WP_000095375.1 MULTISPECIES: XRE family transcriptional regulator [Enterobacteriaceae]		2331
562.23419.con.0010_89|562.23419	COG1620	C	Cluster 3144	2930.0	True	False				False	protein:plasmid:121475 Length: 518 # NCBI annotation: L-lactate permease # Family: family:all:4425 # MgeID: mge:819 # MgeName: pO113 # Cross-refs: genbank:gi:73853307;genbank:GeneID:3654502	True		False	{'GO:0015129', 'GO:0015727', 'GO:0005887'}	{'GO:0005887'}	{'GO:0015129'}	{'GO:0015727'}		{'IPR003804'}	WP_021524611.1 L-lactate permease [Escherichia coli]		2332
562.23427.con.0021_4|562.23427	COG1138	O	Cluster 3372	2928.0	True	False				False	protein:plasmid:149577 Length: 671 # NCBI annotation: cytochrome C-type biogenesis protein # Family: family:all:1453 # MgeID: mge:823 # MgeName: pHG1 # Cross-refs: genbank:gi:38637882;genbank:GeneID:2656660	True		False	{'GO:0015232', 'GO:0016020', 'GO:0017004', 'GO:0015886', 'GO:0020037'}	{'GO:0016020'}	{'GO:0015232', 'GO:0020037'}	{'GO:0017004', 'GO:0015886'}		{'IPR002541', 'IPR032523', 'IPR003568', 'IPR003570', 'IPR003567'}	WP_077532012.1 MULTISPECIES: heme lyase CcmF/NrfE family subunit [Escherichia]		2333
562.23429.con.0026_58|562.23429	COG0431	R	Cluster 16269	41.0	False	False				False	protein:plasmid:141171 Length: 237 # NCBI annotation: arsH # Family: family:all:834 # MgeID: mge:1959 # MgeName: pKPN3 # Cross-refs: genbank:gi:152973484;genbank:GeneID:5343133	True		False	{'GO:0016491'}		{'GO:0016491'}		{'MetaCyc: PWY-6032', 'Reactome: R-RNO-156581', 'KEGG: 00590', 'Reactome: R-HSA-211945', 'MetaCyc: PWY-5955', 'Reactome: R-RNO-9033241', 'MetaCyc: PWY-6200', 'Reactome: R-DME-9033241', 'KEGG: 00980', 'Reactome: R-DME-5578775', 'MetaCyc: PWY-1121', 'MetaCyc: PWY-7065', 'Reactome: R-HSA-196741', 'Reactome: R-DME-392154', 'MetaCyc: PWY-7490', 'Reactome: R-SCE-392154', 'KEGG: 00740', 'Reactome: R-HSA…	{'IPR029039', 'IPR014063', 'IPR005025'}	WP_004118521.1 MULTISPECIES: arsenical resistance protein ArsH [Enterobacterales]		2334
562.23430.con.0068_1|562.23430			Cluster 34361	68.0	False	False				False		False		False							ESA77184.1 hypothetical protein HMPREF1588_01240 [Escherichia coli 110957]	True	2335
562.23432.con.0027_41|562.23432	COG0229	O	Cluster 23696	2927.0	True	False				False	protein:plasmid:113068 Length: 147 # NCBI annotation: methionine-R-sulfoxide reductase # Family: family:all:2549 # MgeID: mge:1901 # MgeName: pSMED02 # Cross-refs: genbank:gi:150377460;interpro:IPR002579;genbank:GeneID:5319652	True		False	{'GO:0016671', 'GO:0055114', 'GO:0030091', 'GO:0033743', 'GO:0006979'}		{'GO:0016671', 'GO:0033743'}	{'GO:0030091', 'GO:0055114', 'GO:0006979'}	{'KEGG: 01120', 'Reactome: R-DRE-5676934', 'Reactome: R-DME-5676934', 'Reactome: R-MMU-5676934', 'KEGG: 00680', 'Reactome: R-RNO-5676934', 'Reactome: R-HSA-5676934', 'KEGG: 01100', 'KEGG: 00270', 'Reactome: R-CEL-5676934', 'MetaCyc: PWY-1801'}	{'IPR028427', 'IPR002579', 'IPR011057'}	STI46917.1 methionine sulfoxide reductase B [Escherichia coli]		2336
562.23437.con.0058_9|562.23437	COG3609	K	Cluster 32146	839.0	False	False				False	protein:plasmid:150297 Length: 86 # NCBI annotation: putative transcriptional regulator, CopG/Arc/MetJ family # Family: family:all:830 # MgeID: mge:1983 # MgeName: pENTE01 # Cross-refs: genbank:gi:146284542;interpro:IPR002145;interpro:IPR005360;interpro:IPR011570;genbank:GeneID:5110399	True		False	{'GO:0006355'}			{'GO:0006355'}	{'MetaCyc: PWY-5737', 'KEGG: 00330', 'MetaCyc: PWY-6922', 'MetaCyc: PWY-6853', 'KEGG: 00250', 'KEGG: 01100', 'KEGG: 01110'}	{'IPR010985', 'IPR038296', 'IPR022789'}	WP_001356324.1 MULTISPECIES: type II toxin-antitoxin system ParD family antitoxin [Escherichia]		2337
562.23439.con.0007_51|562.23439	COG1061	L	Cluster 677	44.0	False	False				False	protein:vir:2950 Length: 559 # NCBI annotation: putative helicase # Family: family:all:69 # MgeID: mge:60 # MgeName: SIFV # Cross-refs: genbank:acc:NP_445687;genbank:gi:16753109;genbank:GeneID:922314	True		False	{'GO:0005524', 'GO:0003677', 'GO:0016787'}		{'GO:0005524', 'GO:0003677', 'GO:0016787'}		{'Reactome: R-HSA-8856828', 'Reactome: R-DME-2179392', 'MetaCyc: PWY-6027', 'Reactome: R-GGA-68689', 'Reactome: R-RNO-5696400', 'Reactome: R-BTA-73817', 'Reactome: R-MMU-381042', 'Reactome: R-GGA-2871796', 'Reactome: R-HSA-5693565', 'Reactome: R-DME-5610780', 'Reactome: R-DDI-5358565', 'Reactome: R-HSA-9684325', 'MetaCyc: PWY-3841', 'Reactome: R-HSA-1660514', 'MetaCyc: PWY-6659', 'Reactome: R-HSA…	{'IPR001650', 'IPR006935', 'IPR014001', 'IPR027417'}	WP_105476400.1 DEAD/DEAH box helicase [Escherichia coli]		2338
562.23439.con.0007_65|562.23439			Cluster 24307	41.0	False	False				False		False		False							WP_016248780.1 MULTISPECIES: hypothetical protein [Enterobacteriaceae]	True	2339
562.23439.con.0025_10|562.23439	COG5001	T	Cluster 2243	2929.0	True	False				False	protein:plasmid:21268 Length: 1178 # NCBI annotation: PROBABLE TRANSMEMBRANE PROTEIN # Family: family:all:50 # MgeID: mge:570 # MgeName: pGMI1000MP # Cross-refs: genbank:acc:NP_521815;genbank:gi:17548475;genbank:GeneID:1222385	True		False	{'GO:0016021', 'GO:0007165'}	{'GO:0016021'}		{'GO:0007165'}	{'MetaCyc: PWY-6027', 'Reactome: R-HSA-418594', 'MetaCyc: PWY-7407', 'MetaCyc: PWY-7693', 'Reactome: R-HSA-110312', 'MetaCyc: PWY-6720', 'KEGG: 00740', 'MetaCyc: PWY-7694', 'MetaCyc: PWY-5994', 'Reactome: R-HSA-162594', 'MetaCyc: PWY-8035', 'MetaCyc: PWY-7448', 'Reactome: R-MMU-170670', 'Reactome: R-GGA-353503', 'MetaCyc: PWY-7670', 'MetaCyc: PWY-5437', 'MetaCyc: PWY-7352', 'MetaCyc: PWY-7659', '…	{'IPR000160', 'IPR035919', 'IPR043128', 'IPR001633', 'IPR029787', 'IPR003660', 'IPR033419'}	WP_097738469.1 biofilm formation regulator HmsP [Escherichia coli]		2340
562.23443.con.0094_3|562.23443			Cluster 3373	2846.0	False	False				False		False		False	{'GO:0035438'}		{'GO:0035438'}			{'IPR017745'}	CQR82952.1 cellulose production protein [Escherichia coli K-12]		2341
562.23453.con.0015_129|562.23453	COG3617	K	Cluster 16678	326.0	False	False				False	protein:proph:183013 Length: 208 # NCBI annotation: hypothetical protein # Family: family:all:671 # MgeID: mge:2699 # MgeName: prophinder:44518 # Cross-refs: genbank:acc:YP_001457095;genbank:gi:157159777;genbank:GeneID:5592690	True		False						{'IPR003497', 'IPR018876'}	WP_039022782.1 hypothetical protein [Escherichia coli]	True	2342
562.23468.con.0017_81|562.23468			Cluster 15588	1389.0	False	False				False		False		False						{'IPR009677'}	WP_112022395.1 DUF1266 domain-containing protein [Escherichia coli]	True	2343
562.23469.con.0007_8|562.23469	COG4974	L	Cluster 10436	401.0	False	False				False	protein:proph:163802 Length: 331 # NCBI annotation: phage integrase family site specific recombinase # Family: family:all:2 # MgeID: mge:2155 # MgeName: prophinder:44194 # Cross-refs: genbank:acc:YP_001462104;genbank:gi:157155436;genbank:GeneID:5587204	True		False	{'GO:0015074', 'GO:0003677', 'GO:0006310'}		{'GO:0003677'}	{'GO:0015074', 'GO:0006310'}	{'MetaCyc: PWY-8179', 'MetaCyc: PWY-8117', 'MetaCyc: PWY-6749', 'Reactome: R-SPO-4615885', 'MetaCyc: PWY-7735', 'MetaCyc: PWY-7127', 'Reactome: R-CEL-4615885', 'Reactome: R-HSA-4615885', 'Reactome: R-DDI-4615885', 'MetaCyc: PWY-6626', 'Reactome: R-MMU-4615885', 'Reactome: R-RNO-4615885', 'MetaCyc: PWY-7419', 'MetaCyc: PWY-7904', 'Reactome: R-SCE-4615885', 'MetaCyc: PWY-6955', 'MetaCyc: PWY-7888',…	{'IPR013762', 'IPR002104', 'IPR044068', 'IPR011010'}	WP_032218581.1 MULTISPECIES: integrase [Enterobacteriaceae]		2344
562.23481.con.0026_15|562.23481			Cluster 15146	49.0	False	False				False		False		False							EEH95902.2 hypothetical protein CSAG_04256 [Citrobacter portucalensis]	True	2345
562.23481.con.0060_14|562.23481			Cluster 8469	21.0	False	False				False	protein:plasmid:154061 Length: 362 # NCBI annotation: plasmid replication protein # Family: family:all:378 # MgeID: mge:1030 # MgeName: R478 # Cross-refs: genbank:gi:38348109;goa:Q6MXA9;interpro:IPR000525;interpro:IPR002584;uniprot:Q6MXA9;genbank:GeneID:2653943	True		False	{'GO:0006270', 'GO:0003887'}		{'GO:0003887'}	{'GO:0006270'}		{'IPR000525'}	EOV84058.1 hypothetical protein A1UI_00085 [Escherichia coli KTE73]	True	2346
562.23481.con.0066_6|562.23481			Cluster 23698	17.0	False	False				False	protein:vir:97253 Length: 137 # NCBI annotation: hypothetical protein ORF002 # Family: family:all:208 # MgeID: mge:1657 # MgeName: M6 # Cross-refs: genbank:acc:YP_001294510;genbank:gi:149408231;genbank:GeneID:5237118	True		False						{'IPR004914', 'IPR042297'}	WP_049015611.1 MULTISPECIES: antirestriction protein [Enterobacteriaceae]		2347
562.23485.con.0062_3|562.23485			Cluster 1346	52.0	False	False				False	protein:proph:173719 Length: 821 # NCBI annotation: hypothetical protein # Family: family:all:25128 # MgeID: mge:2441 # MgeName: prophinder:45757 # Cross-refs: genbank:acc:YP_856593;genbank:gi:117617841;genbank:GeneID:4488584	True		False							WP_024191575.1 hypothetical protein [Escherichia coli]	True	2348
562.23486.con.0075_2|562.23486			Cluster 27528	7.0	False	False				False		False		False	{'GO:0055085', 'GO:0016020'}	{'GO:0016020'}		{'GO:0055085'}		{'IPR006685', 'IPR011066'}	WP_001470701.1 MULTISPECIES: mechanosensitive ion channel family protein, partial [Enterobacterales]		2349
562.23491.con.0012_97|562.23491	COG0477	G	Cluster 6492	2931.0	True	False			{MFS_efflux, tet_MFS_efflux}	True		False		False	{'GO:0005886', 'GO:0042931', 'GO:0022857', 'GO:0042930'}	{'GO:0005886'}	{'GO:0042931', 'GO:0022857'}	{'GO:0042930'}	{'Reactome: R-RNO-210991', 'Reactome: R-MMU-159418', 'Reactome: R-HSA-8856828', 'Reactome: R-XTR-352230', 'Reactome: R-MMU-5653890', 'Reactome: R-RNO-196757', 'MetaCyc: PWY-6369', 'Reactome: R-HSA-352230', 'Reactome: R-MMU-196819', 'Reactome: R-HSA-442660', 'Reactome: R-HSA-5662702', 'Reactome: R-DME-422356', 'Reactome: R-DME-196836', 'Reactome: R-CEL-428643', 'Reactome: R-HSA-5619070', 'Reactome…	{'IPR023722', 'IPR010290', 'IPR036259', 'IPR020846'}	WP_001361261.1 enterobactin transporter EntS [Escherichia coli]		2350
562.23491.con.0019_58|562.23491	COG3624	P	Cluster 21907	2904.0	True	False				False	protein:plasmid:154794 Length: 150 # NCBI annotation: phosphonate metabolism PhnG # Family: family:all:1793 # MgeID: mge:1804 # MgeName: 1 # Cross-refs: genbank:gi:119387505;interpro:IPR009609;genbank:GeneID:4583344	True		False	{'GO:0019634', 'GO:0015716'}			{'GO:0019634', 'GO:0015716'}	{'MetaCyc: PWY-7399', 'MetaCyc: PWY-7807', 'KEGG: 00440', 'KEGG: 01100', 'MetaCyc: PWY-7805'}	{'IPR009609'}	WP_032255805.1 phosphonate C-P lyase system protein PhnG [Escherichia coli]		2351
562.23493.con.0017_89|562.23493			Cluster 22798	2918.0	True	False				False		False		False						{'IPR009587'}	STI62647.1 Protein of uncharacterised function (DUF1198) [Escherichia coli]	True	2352
562.23494.con.0015_38|562.23494			Cluster 407	6.0	False	False				False	protein:vir:101375 Length: 987 # NCBI annotation: S # Family: family:all:13 # MgeID: mge:1512 # MgeName: P1 # Cross-refs: genbank:acc:YP_006502;genbank:gi:46401656;genbank:GeneID:2777437	True		False							KDG28380.1 hypothetical protein AE52_04735 [Escherichia coli BIDMC 77]	True	2353
562.23494.con.0015_78|562.23494			Cluster 24426	25.0	False	False				False		False		False							EQV90325.1 hypothetical protein G894_05281 [Escherichia coli KOEGE 73 (195a)]	True	2354
562.23494.con.0127_1|562.23494	COG0610	V	Cluster 24938	4.0	False	False				False		False		False	{'GO:0004519', 'GO:0003677', 'GO:0006304'}		{'GO:0004519', 'GO:0003677'}	{'GO:0006304'}		{'IPR007409'}	WP_029701843.1 HsdR family type I site-specific deoxyribonuclease [Escherichia coli]		2355
562.23495.con.0019_35|562.23495	COG1123	R	Cluster 808	2928.0	True	False			{ABC_efflux, macB, msbA}	True	protein:plasmid:140690 Length: 618 # NCBI annotation: putative peptide ABC transporter, ATP-binding protein # Family: family:all:1 # MgeID: mge:1048 # MgeName: p42e # Cross-refs: genbank:gi:86360619;cog:COG1123;pfam:PF00005.11;sm:SM00382;interpro:IPR001687;interpro:IPR003439;interpro:IPR003593;uniprot:Q8UAV5;genbank:GeneID:3895542	True		False	{'GO:0005524', 'GO:0015833', 'GO:0000166', 'GO:0016887', 'GO:0016787'}		{'GO:0005524', 'GO:0000166', 'GO:0016887', 'GO:0016787'}	{'GO:0015833'}	{'Reactome: R-HSA-8856828', 'Reactome: R-DME-2179392', 'MetaCyc: PWY-6027', 'Reactome: R-GGA-68689', 'Reactome: R-RNO-5696400', 'Reactome: R-BTA-73817', 'Reactome: R-MMU-381042', 'Reactome: R-GGA-2871796', 'Reactome: R-HSA-5693565', 'Reactome: R-DME-5610780', 'Reactome: R-HSA-9684325', 'Reactome: R-DDI-5358565', 'MetaCyc: PWY-3841', 'Reactome: R-HSA-1660514', 'MetaCyc: PWY-6659', 'Reactome: R-HSA…	{'IPR029055', 'IPR013563', 'IPR003593', 'IPR027417', 'IPR017871', 'IPR000246', 'IPR003439'}	STE98559.1 glutathione transporter ATP-binding protein [Escherichia coli]		2356
562.23502.con.0011_136|562.23502	COG1119	P	Cluster 4114	2930.0	True	False			{ABC_efflux, macB, msbA}	True	protein:plasmid:113905 Length: 355 # NCBI annotation: nodulation ABC transporter NodI # Family: family:all:1 # MgeID: mge:1901 # MgeName: pSMED02 # Cross-refs: genbank:gi:150378142;interpro:IPR003439;interpro:IPR003593;interpro:IPR005978;genbank:GeneID:5320489	True		False	{'GO:0005524'}		{'GO:0005524'}		{'Reactome: R-HSA-8856828', 'Reactome: R-DME-2179392', 'MetaCyc: PWY-6027', 'Reactome: R-GGA-68689', 'Reactome: R-RNO-5696400', 'Reactome: R-BTA-73817', 'Reactome: R-MMU-381042', 'Reactome: R-GGA-2871796', 'Reactome: R-HSA-5693565', 'Reactome: R-DME-5610780', 'Reactome: R-DDI-5358565', 'Reactome: R-HSA-9684325', 'MetaCyc: PWY-3841', 'Reactome: R-HSA-1660514', 'MetaCyc: PWY-6659', 'Reactome: R-HSA…	{'IPR003593', 'IPR027417', 'IPR003439'}	WP_000096851.1 molybdate ABC transporter ATP-binding protein ModF [Escherichia coli]		2357
562.23504.con.0149_4|562.23504			Cluster 25174	1389.0	False	False				False	protein:plasmid:19690 Length: 122 # NCBI annotation: conjugal transfer protein TrbD # Family: family:all:1628 # MgeID: mge:518 # MgeName: R100 # Cross-refs: genbank:acc:NP_052953;genbank:gi:9507622;genbank:GeneID:1263412	True		False						{'IPR024396'}	WP_071586941.1 MULTISPECIES: DUF2689 domain-containing protein [Enterobacteriaceae]	True	2358
562.23504.con.0161_1|562.23504	COG5562	S	Cluster 11010	1646.0	False	False				False	protein:proph:181318 Length: 141 # NCBI annotation: hypothetical protein # Family: family:all:3145 # MgeID: mge:2649 # MgeName: prophinder:43540 # Cross-refs: genbank:acc:YP_311308;genbank:gi:74312889;genbank:GeneID:3668582	True		False						{'IPR009833', 'IPR036696', 'IPR025030'}	EOW17977.1 phage protein [Escherichia coli KTE103]		2359
562.23507.con.0026_18|562.23507	COG3842	E	Cluster 7479	2929.0	True	False			{ABC_efflux, macB, msbA}	True	protein:plasmid:158721 Length: 392 # NCBI annotation: putative putrescine ABC transporter ATP-binding protein # Family: family:all:1 # MgeID: mge:791 # MgeName: pSD25 # Cross-refs: genbank:gi:28558949;genbank:GeneID:3240163	True		False	{'GO:0005524', 'GO:0022857', 'GO:0043190', 'GO:0016020', 'GO:0015594', 'GO:0015846', 'GO:0016887', 'GO:0055085', 'GO:0015595', 'GO:0015417'}	{'GO:0043190', 'GO:0016020'}	{'GO:0005524', 'GO:0022857', 'GO:0015594', 'GO:0016887', 'GO:0015595', 'GO:0015417'}	{'GO:0015846', 'GO:0055085'}	{'Reactome: R-HSA-8856828', 'Reactome: R-DME-2179392', 'MetaCyc: PWY-6027', 'Reactome: R-GGA-68689', 'Reactome: R-RNO-5696400', 'Reactome: R-BTA-73817', 'Reactome: R-MMU-381042', 'Reactome: R-GGA-2871796', 'Reactome: R-HSA-5693565', 'Reactome: R-DME-5610780', 'Reactome: R-DDI-5358565', 'Reactome: R-HSA-9684325', 'MetaCyc: PWY-3841', 'Reactome: R-HSA-1660514', 'MetaCyc: PWY-6659', 'Reactome: R-HSA…	{'IPR003593', 'IPR017879', 'IPR003439', 'IPR013611', 'IPR027417', 'IPR005893', 'IPR017871', 'IPR008995'}	STI66604.1 spermidine/putrescine ABC transporter ATP-binding protein [Escherichia coli]		2360
562.23511.con.0004_49|562.23511	COG1414	K	Cluster 11112	1626.0	False	False				False		False		False	{'GO:0006355', 'GO:0003677'}		{'GO:0003677'}	{'GO:0006355'}	{'Reactome: R-HSA-8856828', 'MetaCyc: PWY-6027', 'Reactome: R-CEL-3214842', 'Reactome: R-RNO-5696400', 'Reactome: R-HSA-5368598', 'Reactome: R-HSA-1660514', 'Reactome: R-HSA-5693565', 'Reactome: R-DME-5610780', 'MetaCyc: PWY-7693', 'Reactome: R-MMU-2468052', 'Reactome: R-DDI-174178', 'MetaCyc: PWY-6720', 'MetaCyc: PWY-5994', 'MetaCyc: PWY-2723', 'MetaCyc: PWY-8035', 'Reactome: R-XTR-110312', 'Rea…	{'IPR036390', 'IPR005471', 'IPR014757', 'IPR029016', 'IPR036388'}	WP_085440484.1 DNA-binding transcriptional activator MhpR [Escherichia coli]		2361
562.23520.con.0033_1|562.23520			Cluster 37753	40.0	False	False				False		False		False							STG51544.1 Uncharacterised protein [Escherichia coli]	True	2362
562.23529.con.0050_2|562.23529	COG4325	S	Cluster 5252	1127.0	False	False				False	protein:plasmid:141025 Length: 425 # NCBI annotation: hypothetical protein # Family: family:all:18152 # MgeID: mge:1959 # MgeName: pKPN3 # Cross-refs: genbank:gi:152973517;genbank:GeneID:5342987	True		False						{'IPR018723'}	WP_001409274.1 DUF2254 domain-containing protein [Escherichia coli]	True	2363
562.23530.con.0006_118|562.23530	COG0338	L	Cluster 13550	27.0	False	False				False	protein:plasmid:24133 Length: 274 # NCBI annotation: putative DNA modification methylase # Family: family:all:97 # MgeID: mge:587 # MgeName: pHCM1 # Cross-refs: genbank:acc:NP_569284;genbank:gi:18466476;genbank:GeneID:1251213	True		False	{'GO:0009007', 'GO:0032775'}		{'GO:0009007'}	{'GO:0032775'}	{'MetaCyc: PWY-5301', 'MetaCyc: PWY-6027', 'MetaCyc: PWY-7091', 'MetaCyc: PWY-8007', 'Reactome: R-BTA-71288', 'Reactome: R-DRE-71288', 'MetaCyc: PWY-7161', 'Reactome: R-HSA-9684325', 'MetaCyc: PWY-7407', 'MetaCyc: PWY-6659', 'MetaCyc: PWY-5818', 'MetaCyc: PWY-5110', 'MetaCyc: PWY-7701', 'MetaCyc: PWY-7693', 'MetaCyc: PWY-6906', 'MetaCyc: PWY-7397', 'MetaCyc: PWY-7605', 'Reactome: R-HSA-197264', '…	{'IPR012327', 'IPR012263', 'IPR023095', 'IPR029063'}	WP_015063093.1 MULTISPECIES: Dam family site-specific DNA-(adenine-N6)-methyltransferase [Enterobacterales]		2366
562.23530.con.0006_73|562.23530	COG4643	S	Cluster 5627	34.0	False	False				False	protein:plasmid:24178 Length: 417 # NCBI annotation: hypothetical protein # Family: family:all:100 # MgeID: mge:587 # MgeName: pHCM1 # Cross-refs: genbank:acc:NP_569329;genbank:gi:18466521;genbank:GeneID:1251167	True		False					{'Reactome: R-DDI-5693616', 'Reactome: R-HSA-5693616', 'Reactome: R-HSA-912446', 'Reactome: R-HSA-1362277', 'Reactome: R-MMU-6804756', 'Reactome: R-DME-4615885', 'Reactome: R-MMU-69473', 'MetaCyc: PWY-8179', 'MetaCyc: PWY-8117', 'Reactome: R-SSC-4615885', 'MetaCyc: PWY-6749', 'Reactome: R-HSA-5693607', 'Reactome: R-SPO-4615885', 'MetaCyc: PWY-7735', 'Reactome: R-HSA-5685938', 'MetaCyc: PWY-7127',…	{'IPR006171'}	WP_015063135.1 hypothetical protein [Citrobacter freundii]	True	2364
562.23530.con.0006_82|562.23530	COG0210	L	Cluster 2768	35.0	False	False				False	protein:plasmid:24169 Length: 594 # NCBI annotation: putative DNA helicase # Family: family:all:343 # MgeID: mge:587 # MgeName: pHCM1 # Cross-refs: genbank:acc:NP_569320;genbank:gi:18466512;genbank:gi:32765047;genbank:GeneID:1251176	True		False	{'GO:0005524', 'GO:0003677', 'GO:0016787', 'GO:0003678'}		{'GO:0005524', 'GO:0003677', 'GO:0016787', 'GO:0003678'}		{'Reactome: R-HSA-8856828', 'Reactome: R-DME-2179392', 'MetaCyc: PWY-6027', 'Reactome: R-GGA-68689', 'Reactome: R-RNO-5696400', 'Reactome: R-BTA-73817', 'Reactome: R-MMU-381042', 'Reactome: R-GGA-2871796', 'Reactome: R-HSA-5693565', 'Reactome: R-DME-5610780', 'Reactome: R-DDI-5358565', 'Reactome: R-HSA-9684325', 'MetaCyc: PWY-3841', 'Reactome: R-HSA-1660514', 'MetaCyc: PWY-6659', 'Reactome: R-HSA…	{'IPR000212', 'IPR027417', 'IPR013986', 'IPR014017', 'IPR014016'}	WP_015063127.1 MULTISPECIES: ATP-dependent helicase [Enterobacterales]		2365
562.23530.con.0036_45|562.23530			Cluster 18470	8.0	False	False				False	protein:plasmid:24290 Length: 204 # NCBI annotation: hypothetical protein # Family: family:all:6261 # MgeID: mge:587 # MgeName: pHCM1 # Cross-refs: genbank:acc:NP_569437;genbank:gi:18466629;genbank:GeneID:1251276	True		False							WP_032610449.1 MULTISPECIES: hypothetical protein [Enterobacterales]	True	2367
562.23530.con.0050_2|562.23530	COG0863	L	Cluster 6300	21.0	False	False				False	protein:plasmid:153984 Length: 416 # NCBI annotation: modification methylase # Family: family:all:1134 # MgeID: mge:1030 # MgeName: R478 # Cross-refs: genbank:gi:38348090;goa:Q6MXC8;interpro:IPR001091;interpro:IPR002295;interpro:IPR002941;uniprot:Q6MXC8;genbank:GeneID:2653866	True		False	{'GO:0015667', 'GO:0008170', 'GO:0090124', 'GO:0006306', 'GO:0003677'}		{'GO:0008170', 'GO:0003677', 'GO:0015667'}	{'GO:0006306', 'GO:0090124'}	{'MetaCyc: PWY-5301', 'MetaCyc: PWY-6027', 'MetaCyc: PWY-7091', 'MetaCyc: PWY-8007', 'Reactome: R-BTA-71288', 'Reactome: R-DRE-71288', 'MetaCyc: PWY-7161', 'Reactome: R-HSA-9684325', 'MetaCyc: PWY-7407', 'MetaCyc: PWY-6659', 'MetaCyc: PWY-5818', 'MetaCyc: PWY-5110', 'MetaCyc: PWY-7701', 'MetaCyc: PWY-7693', 'MetaCyc: PWY-6906', 'MetaCyc: PWY-7397', 'MetaCyc: PWY-7605', 'Reactome: R-HSA-197264', '…	{'IPR017985', 'IPR025745', 'IPR002941', 'IPR029063', 'IPR001091'}	WP_015063031.1 MULTISPECIES: DNA methyltransferase [Enterobacteriaceae]		2368
562.23530.con.0050_32|562.23530			Cluster 35678	8.0	False	False				False	protein:plasmid:24323 Length: 88 # NCBI annotation: hypothetical protein # Family: family:all:9881 # MgeID: mge:587 # MgeName: pHCM1 # Cross-refs: genbank:acc:NP_872583;genbank:gi:32765052;genbank:GeneID:1251217	True		False							WP_044255297.1 MULTISPECIES: hypothetical protein [Enterobacteriaceae]	True	2369
562.23530.con.0054_2|562.23530	COG2916	R	Cluster 24205	6.0	False	False				False	protein:plasmid:147041 Length: 144 # NCBI annotation: DNA-binding protein # Family: family:all:222 # MgeID: mge:1129 # MgeName: pSG1 # Cross-refs: genbank:gi:85060413;genbank:GeneID:3866541	True		False	{'GO:0046983', 'GO:0006355', 'GO:0003677'}		{'GO:0046983', 'GO:0003677'}	{'GO:0006355'}		{'IPR037150', 'IPR001801', 'IPR027454', 'IPR027444'}	WP_040115250.1 MULTISPECIES: DNA-binding protein [Enterobacteriaceae]		2370
562.23531.con.0002_313|562.23531			Cluster 19658	32.0	False	False				False	protein:proph:169485 Length: 193 # NCBI annotation: hypothetical protein # Family: family:all:24635 # MgeID: mge:2327 # MgeName: prophinder:42514 # Cross-refs: genbank:acc:YP_001453457;genbank:gi:157146138;genbank:GeneID:5584340	True		False							WP_047675690.1 hypothetical protein [Escherichia coli]	True	2371
562.23532.con.0039_24|562.23532			Cluster 26096	20.0	False	False				False	protein:plasmid:24426 Length: 57 # NCBI annotation: hypothetical protein # Family: family:all:67 # MgeID: mge:588 # MgeName: pHCM2 # Cross-refs: genbank:acc:NP_569574;genbank:gi:18466767;genbank:GeneID:1251489	True		False							RDS13887.1 hypothetical protein C3993_01435 [Escherichia coli]	True	2372
562.23537.con.0004_131|562.23537	COG2333	R	Cluster 1578	2927.0	True	False			{ClassB, DIM-GIM-SIM, NDM-CcrA, SubclassB1}	True		False		False	{'GO:0016021', 'GO:0030420'}	{'GO:0016021'}		{'GO:0030420'}	{'Reactome: R-RNO-5693571', 'KEGG: 00230', 'Reactome: R-BTA-1614517', 'KEGG: 00785', 'Reactome: R-RNO-6783310', 'KEGG: 00790', 'Reactome: R-MMU-72163', 'MetaCyc: PWY-7521', 'MetaCyc: PWY-6948', 'MetaCyc: PWY-8055', 'Reactome: R-DME-73856', 'Reactome: R-HSA-159231', 'Reactome: R-HSA-8868766', 'Reactome: R-HSA-2466712', 'MetaCyc: PWY-6415', 'Reactome: R-HSA-72163', 'MetaCyc: PWY-7807', 'MetaCyc: PW…	{'IPR004797', 'IPR036866', 'IPR001279', 'IPR035681', 'IPR004477'}	WP_000705728.1 ComEC family protein [Escherichia coli]		2373
562.23539.con.0046_5|562.23539			Cluster 15995	216.0	False	False				False	protein:plasmid:119749 Length: 248 # NCBI annotation: functional relaxosome complex initiator # Family: family:all:1368 # MgeID: mge:774 # MgeName: pUTI89 # Cross-refs: genbank:gi:91206349;genbank:GeneID:3996471	True		False	{'GO:0006355'}			{'GO:0006355'}	{'Reactome: R-MMU-159418', 'Reactome: R-HSA-400206', 'MetaCyc: PWY-8176', 'KEGG: 00230', 'MetaCyc: PWY-7878', 'MetaCyc: PWY-6575', 'Reactome: R-HSA-211945', 'MetaCyc: PWY-6368', 'KEGG: 04714', 'Reactome: R-HSA-6785807', 'MetaCyc: PWY-6720', 'MetaCyc: PWY-8052', 'Reactome: R-DRE-211976', 'Reactome: R-DME-1234158', 'Reactome: R-MMU-1234158', 'Reactome: R-HSA-3899300', 'MetaCyc: PWY-7018', 'Reactome…	{'IPR013767'}	VCY80957.1 hypothetical protein BANRA_04794 [Escherichia coli]	True	2374
562.23541.con.0008_21|562.23541	COG2202	T	Cluster 2186	2926.0	True	False				False	protein:plasmid:22916 Length: 852 # NCBI annotation: putative sensory box/GGDEF family protein # Family: family:all:50 # MgeID: mge:572 # MgeName: p42d # Cross-refs: genbank:acc:NP_659931;genbank:gi:21492856;pfam:PF00563.9;pfam:PF00785.11;pfam:PF00989.11;pfam:PF00990.8;sm:SM00052;sm:SM00086;sm:SM00091;sm:SM00267;interpro:IPR000014;interpro:IPR000160;interpro:IPR000700;interpro:IPR001610;interpro:…	True		False					{'Reactome: R-MMU-159418', 'Reactome: R-RNO-5689880', 'MetaCyc: PWY-6027', 'Reactome: R-HSA-418594', 'Reactome: R-HSA-211945', 'MetaCyc: PWY-7407', 'MetaCyc: PWY-7693', 'Reactome: R-HSA-110312', 'Reactome: R-HSA-6785807', 'MetaCyc: PWY-6720', 'KEGG: 00740', 'MetaCyc: PWY-7694', 'MetaCyc: PWY-5994', 'Reactome: R-HSA-162594', 'MetaCyc: PWY-8035', 'Reactome: R-SPO-2465910', 'MetaCyc: PWY-7448', 'Rea…	{'IPR000160', 'IPR035919', 'IPR000014', 'IPR035965', 'IPR043128', 'IPR001633', 'IPR029787'}	WP_000859966.1 MULTISPECIES: cyclic di-GMP phosphodiesterase [Enterobacteriaceae]		2375
562.23548.con.0037_1|562.23548			Cluster 17647	2918.0	True	False				False		False		False						{'IPR021236'}	WP_000825598.1 MULTISPECIES: hypothetical protein [Escherichia]	True	2376
562.23554.con.0007_98|562.23554	COG0431	R	Cluster 18855	2927.0	True	False				False		False		False	{'GO:0016491', 'GO:0046306', 'GO:0008752', 'GO:0055114'}		{'GO:0016491', 'GO:0008752'}	{'GO:0046306', 'GO:0055114'}	{'MetaCyc: PWY-6032', 'Reactome: R-RNO-156581', 'KEGG: 00590', 'Reactome: R-HSA-211945', 'MetaCyc: PWY-5955', 'Reactome: R-RNO-9033241', 'MetaCyc: PWY-6200', 'Reactome: R-DME-9033241', 'KEGG: 00980', 'Reactome: R-DME-5578775', 'MetaCyc: PWY-1121', 'MetaCyc: PWY-7065', 'Reactome: R-HSA-196741', 'Reactome: R-DME-392154', 'MetaCyc: PWY-7490', 'Reactome: R-SCE-392154', 'KEGG: 00740', 'Reactome: R-HSA…	{'IPR020048', 'IPR029039', 'IPR005025'}	EGU95167.1 FMN reductase, partial [Escherichia coli MS 79-10]		2377
562.23559.con.0098_7|562.23559	COG3187	O	Cluster 23579	2924.0	True	False				False		False		False						{'IPR038670', 'IPR005184'}	ERA28000.1 heat shock protein hslJ [Escherichia coli UMEA 3899-1]		2378
562.23583.con.0022_33|562.23583			Cluster 25619	44.0	False	False				False		False		False							KPO28822.1 hypothetical protein ACU65_07120 [Escherichia coli]	True	2379
562.23583.con.0022_38|562.23583			Cluster 14795	477.0	False	False				False		False		False							STG77183.1 Uncharacterised protein [Escherichia coli]	True	2380
562.23583.con.0025_2|562.23583	COG5006	R	Cluster 11619	2926.0	True	False				False	protein:plasmid:138413 Length: 295 # NCBI annotation: protein of unknown function DUF6, transmembrane # Family: family:all:118 # MgeID: mge:1819 # MgeName: pPNAP04 # Cross-refs: genbank:gi:121583460;interpro:IPR000620;genbank:GeneID:4685929	True		False	{'GO:0016021', 'GO:0016020'}	{'GO:0016021', 'GO:0016020'}				{'IPR000620'}	WP_001119541.1 threonine/homoserine exporter RhtA [Escherichia coli]		2381
562.23584.con.0009_8|562.23584	COG1869	G	Cluster 24312	2930.0	True	False				False		False		False	{'GO:0016853', 'GO:0048029', 'GO:0005996', 'GO:0016872'}		{'GO:0016853', 'GO:0048029', 'GO:0016872'}	{'GO:0005996'}	{'Reactome: R-MMU-6787639', 'Reactome: R-DRE-6787639', 'Reactome: R-HSA-6787639'}	{'IPR007721', 'IPR023750', 'IPR023064'}	AAN83108.1 High affinity ribose transport protein rbsD [Escherichia coli CFT073]		2382
562.23587.con.0022_14|562.23587			Cluster 22217	18.0	False	False				False	protein:vir:136 Length: 160 # NCBI annotation: unknown # Family: family:all:67 # MgeID: mge:5 # MgeName: HK620 # Cross-refs: genbank:acc:NP_112041;genbank:gi:13559831;genbank:GeneID:920983	True		False							WP_087906957.1 hypothetical protein [Escherichia coli]	True	2383
562.23589.con.0032_16|562.23589	COG3405	G	Cluster 8328	2920.0	True	False				False		False		False	{'GO:0005975', 'GO:0004553'}		{'GO:0004553'}	{'GO:0005975'}	{'MetaCyc: PWY-6771', 'MetaCyc: PWY-7463', 'MetaCyc: PWY-2902', 'MetaCyc: PWY-7091', 'MetaCyc: PWY-7145', 'MetaCyc: PWY-6855', 'MetaCyc: PWY-7651', 'MetaCyc: PWY-5926', 'MetaCyc: PWY-2722', 'MetaCyc: PWY-5800', 'Reactome: R-HSA-4793950', 'KEGG: 00980', 'MetaCyc: PWY-7623', 'MetaCyc: PWY-6906', 'MetaCyc: PWY-7151', 'MetaCyc: PWY-7918', 'MetaCyc: PWY-5875', 'Reactome: R-RNO-1660662', 'MetaCyc: PWY-…	{'IPR008928', 'IPR019834', 'IPR002037', 'IPR012341'}	WP_115205842.1 cellulase [Escherichia coli]		2384
562.23593.con.0062_1|562.23593	COG1653	G	Cluster 5459	303.0	False	False				False	protein:plasmid:157365 Length: 410 # NCBI annotation: putative periplasmic solute-binding component of ABC transporter # Family: family:all:74 # MgeID: mge:1143 # MgeName: pRL9 # Cross-refs: genbank:gi:116249685;goa:Q1M971;uniprot:Q1M971;genbank:GeneID:4398718	True		False					{'MetaCyc: PWY-6032', 'MetaCyc: PWY-6314', 'MetaCyc: PWY-8075', 'MetaCyc: PWY-7702', 'MetaCyc: PWY-6027', 'MetaCyc: PWY-7050', 'MetaCyc: PWY-8084', 'MetaCyc: PWY-8036', 'MetaCyc: PWY-7407', 'MetaCyc: PWY-5903', 'MetaCyc: PWY-8166', 'MetaCyc: PWY-6948', 'MetaCyc: PWY-7693', 'MetaCyc: PWY-7470', 'MetaCyc: PWY-8055', 'MetaCyc: PWY-7656', 'MetaCyc: PWY-7168', 'MetaCyc: PWY-5875', 'MetaCyc: PWY-7984',…	{'IPR006059'}	WP_000476108.1 MULTISPECIES: ABC transporter substrate-binding protein [Enterobacteriaceae]		2385
562.23608.con.0018_47|562.23608			Cluster 31069	19.0	False	False				False	protein:plasmid:133782 Length: 75 # NCBI annotation: hypothetical protein # Family: family:all:152 # MgeID: mge:1942 # MgeName: pESA2 # Cross-refs: genbank:gi:156936536;genbank:GeneID:5552533	True		False							WP_001032611.1 MULTISPECIES: hypothetical protein [Enterobacteriaceae]	True	2386
562.23608.con.0061_2|562.23608			Cluster 37904	9.0	False	False				False		False		False							EHW60072.1 hypothetical protein ECDEC9D_5596 [Escherichia coli DEC9D]	True	2387
562.23614.con.0019_104|562.23614	COG2859	S	Cluster 13059	532.0	False	False				False		False		False						{'IPR016907', 'IPR007497'}	EGI16179.1 conserved hypothetical protein [Escherichia coli M605]	True	2388
562.23617.con.0001_180|562.23617	COG3083	R	Cluster 2913	2931.0	True	False				False		False		False	{'GO:0008484', 'GO:0003824'}		{'GO:0008484', 'GO:0003824'}		{'Reactome: R-HSA-1483166', 'Reactome: R-MMU-2024096', 'MetaCyc: PWY-8176', 'KEGG: 00230', 'MetaCyc: PWY-7878', 'Reactome: R-BTA-6798695', 'MetaCyc: PWY-7651', 'MetaCyc: PWY-6575', 'KEGG: 00790', 'KEGG: 00540', 'MetaCyc: PWY-6368', 'KEGG: 00531', 'MetaCyc: PWY-7187', 'Reactome: R-HSA-2022857', 'Reactome: R-RNO-1660662', 'MetaCyc: PWY-8045', 'KEGG: 00051', 'KEGG: 00740', 'MetaCyc: PWY-6720', 'Meta…	{'IPR024588', 'IPR000917', 'IPR017850', 'IPR012159'}	WP_000256179.1 DUF3413 domain-containing protein [Escherichia coli]	True	2389
562.23620.con.0037_11|562.23620			Cluster 16411	17.0	False	False				False	protein:vir:212 Length: 176 # NCBI annotation: Gp37 # Family: family:all:67 # MgeID: mge:6 # MgeName: HK97 # Cross-refs: genbank:acc:NP_037722;genbank:gi:9634184;genbank:GeneID:1262568	True		False							WP_097455808.1 hypothetical protein [Escherichia coli]	True	2390
562.23626.con.0003_141|562.23626	COG0477	G	Cluster 4634	2931.0	True	False			{Chlor_Efflux_Pump, emrB, MFS_efflux, norA, TetA, TetA-B, TetA-G, TetD, TetE, TetH-TetJ, tet_MFS_efflux, TetY}	True	protein:plasmid:112742 Length: 424 # NCBI annotation: TetB # Family: family:all:10 # MgeID: mge:1134 # MgeName: pHS-Tet # Cross-refs: genbank:gi:58616069;genbank:GeneID:3267155	True		False	{'GO:0055085', 'GO:0022857'}		{'GO:0022857'}	{'GO:0055085'}	{'Reactome: R-RNO-210991', 'Reactome: R-MMU-159418', 'Reactome: R-HSA-8856828', 'Reactome: R-XTR-352230', 'Reactome: R-MMU-5653890', 'Reactome: R-RNO-196757', 'MetaCyc: PWY-6369', 'Reactome: R-HSA-352230', 'Reactome: R-MMU-196819', 'Reactome: R-HSA-442660', 'Reactome: R-HSA-5662702', 'Reactome: R-DME-422356', 'Reactome: R-DME-196836', 'Reactome: R-CEL-428643', 'Reactome: R-HSA-5619070', 'Reactome…	{'IPR036259', 'IPR011701', 'IPR020846'}	WP_001000990.1 MULTISPECIES: MFS transporter [Escherichia]		2391
562.23632.con.0078_2|562.23632	COG0454	K	Cluster 22922	2928.0	True	False				False		False		False	{'GO:0008080'}		{'GO:0008080'}		{'MetaCyc: PWY-6027', 'Reactome: R-HSA-5693565', 'MetaCyc: PWY-7407', 'Reactome: R-MMU-350054', 'MetaCyc: PWY-7693', 'Reactome: R-HSA-177135', 'Reactome: R-RNO-5693607', 'Reactome: R-BTA-351200', 'MetaCyc: PWY-7694', 'MetaCyc: PWY-5994', 'Reactome: R-RNO-177128', 'Reactome: R-MMU-5693568', 'MetaCyc: PWY-8035', 'Reactome: R-SPO-351200', 'MetaCyc: PWY-6157', 'MetaCyc: PWY-7448', 'Reactome: R-MMU-56…	{'IPR016181', 'IPR000182'}	WP_000236967.1 acetyltransferase [Escherichia coli]		2392
562.23635.con.0001_360|562.23635	COG2771	K	Cluster 15518	2920.0	True	False				False	protein:plasmid:21792 Length: 248 # NCBI annotation: PROBABLE TRANSCRIPTIONAL ACTIVATOR OF QUORUM SENSING AUTOINDUCER SYNTHESIS TRANSCRIPTION REGULATOR PROTEIN # Family: family:all:401 # MgeID: mge:570 # MgeName: pGMI1000MP # Cross-refs: genbank:acc:NP_522339;genbank:gi:17548999;genbank:GeneID:1223085	True		False	{'GO:0006355', 'GO:0003677'}		{'GO:0003677'}	{'GO:0006355'}	{'Reactome: R-HSA-8856828', 'MetaCyc: PWY-6027', 'Reactome: R-CEL-3214842', 'Reactome: R-RNO-5696400', 'Reactome: R-HSA-5368598', 'Reactome: R-HSA-1660514', 'Reactome: R-HSA-5693565', 'Reactome: R-DME-5610780', 'MetaCyc: PWY-7693', 'Reactome: R-DDI-174178', 'MetaCyc: PWY-6720', 'MetaCyc: PWY-5994', 'MetaCyc: PWY-2723', 'MetaCyc: PWY-8035', 'Reactome: R-XTR-110312', 'Reactome: R-DME-4086400', 'Met…	{'IPR005143', 'IPR016032', 'IPR036388', 'IPR000792', 'IPR036693'}	WP_072020839.1 transcriptional regulator SdiA [Escherichia coli]		2393
562.23639.con.0107_7|562.23639			Cluster 37438	253.0	False	False				False		False		False							KDX07817.1 hypothetical protein AD27_3338 [Escherichia coli 2-177-06_S4_C3]	True	2394
562.23641.con.0184_3|562.23641			Cluster 31071	1898.0	False	False				False	protein:plasmid:19708 Length: 94 # NCBI annotation: pilin chaperone protein # Family: family:all:1153 # MgeID: mge:518 # MgeName: R100 # Cross-refs: genbank:acc:NP_052971;genbank:gi:9507640;genbank:GeneID:1263465	True		False						{'IPR014112'}	WP_032106621.1 type-F conjugative transfer system pilin chaperone TraQ [Escherichia coli]		2395
562.23645.con.0039_27|562.23645			Cluster 24818	57.0	False	False				False	protein:plasmid:151001 Length: 139 # NCBI annotation: StbA # Family: family:all:3568 # MgeID: mge:977 # MgeName: pMUR050 # Cross-refs: genbank:gi:113706788;genbank:GeneID:3861225	True		False							WP_094316479.1 hypothetical protein [Escherichia coli]	True	2397
562.23645.con.0039_3|562.23645	COG1961	L	Cluster 19252	72.0	False	False				False	protein:plasmid:151010 Length: 198 # NCBI annotation: resolvase # Family: family:all:7 # MgeID: mge:977 # MgeName: pMUR050 # Cross-refs: genbank:gi:113706745;genbank:GeneID:4246754	True		False	{'GO:0003677', 'GO:0000150', 'GO:0006310'}		{'GO:0003677', 'GO:0000150'}	{'GO:0006310'}	{'Reactome: R-CEL-3214842', 'MetaCyc: PWY-6027', 'Reactome: R-HSA-156711', 'Reactome: R-HSA-5693565', 'MetaCyc: PWY-7407', 'Reactome: R-MMU-72163', 'Reactome: R-MMU-350054', 'Reactome: R-XTR-174417', 'MetaCyc: PWY-7693', 'Reactome: R-MMU-174417', 'Reactome: R-HSA-1839117', 'Reactome: R-HSA-6785807', 'MetaCyc: PWY-7694', 'MetaCyc: PWY-5994', 'MetaCyc: PWY-2723', 'MetaCyc: PWY-8035', 'Reactome: R-R…	{'IPR036162', 'IPR006119', 'IPR006118', 'IPR006120', 'IPR009057'}	WP_047365747.1 MULTISPECIES: recombinase family protein [Enterobacter cloacae complex]		2396
562.23649.con.0114_9|562.23649			Cluster 10101	170.0	False	False				False		False		False						{'IPR020404'}	WP_001572188.1 DUF2713 family protein [Escherichia coli]	True	2398
562.23653.con.0010_132|562.23653	COG0793	M	Cluster 2059	2928.0	True	False				False	protein:plasmid:120270 Length: 704 # NCBI annotation: putative exported tail-specific protease precursor # Family: family:all:5669 # MgeID: mge:779 # MgeName: pRL12 # Cross-refs: genbank:gi:116248948;goa:Q1M4I1;uniprot:Q1M4I1;genbank:GeneID:4398335	True		False	{'GO:0005515', 'GO:0008236', 'GO:0006508'}		{'GO:0005515', 'GO:0008236'}	{'GO:0006508'}	{'Reactome: R-HSA-8856828', 'Reactome: R-BTA-69017', 'Reactome: R-HSA-70895', 'Reactome: R-RNO-5689880', 'MetaCyc: PWY-6027', 'Reactome: R-HSA-418594', 'MetaCyc: PWY-5789', 'Reactome: R-HSA-5368598', 'Reactome: R-DME-195253', 'Reactome: R-DME-5610780', 'MetaCyc: PWY-7407', 'MetaCyc: PWY-7693', 'Reactome: R-HSA-2028269', 'Reactome: R-SSC-71032', 'Reactome: R-DDI-174178', 'Reactome: R-DME-5625900',…	{'IPR040573', 'IPR004447', 'IPR001478', 'IPR036034', 'IPR029045', 'IPR020992', 'IPR005151'}	WP_001055794.1 MULTISPECIES: tail-specific protease [Escherichia]		2399
562.23653.con.0054_16|562.23653	COG0003	P	Cluster 2660	351.0	False	False				False	protein:plasmid:141165 Length: 583 # NCBI annotation: Arsenical pump-driving ATPase (Arsenite-translocating ATPase) # Family: family:all:1381 # MgeID: mge:1959 # MgeName: pKPN3 # Cross-refs: genbank:gi:152973478;genbank:GeneID:5343127	True		False	{'GO:0005524', 'GO:0071722', 'GO:0015446', 'GO:0016887'}		{'GO:0005524', 'GO:0015446', 'GO:0016887'}	{'GO:0071722'}	{'Reactome: R-HSA-8856828', 'Reactome: R-DME-2179392', 'MetaCyc: PWY-6027', 'Reactome: R-GGA-68689', 'Reactome: R-RNO-5696400', 'Reactome: R-BTA-73817', 'Reactome: R-MMU-381042', 'Reactome: R-GGA-2871796', 'Reactome: R-HSA-5693565', 'Reactome: R-DME-5610780', 'Reactome: R-DDI-5358565', 'Reactome: R-HSA-9684325', 'MetaCyc: PWY-3841', 'Reactome: R-HSA-1660514', 'MetaCyc: PWY-6659', 'Reactome: R-HSA…	{'IPR027417', 'IPR025723', 'IPR027541', 'IPR016300'}	SRB69740.1 Arsenical pump-driving ATPase [Escherichia coli]		2400
562.23653.con.0066_1|562.23653	COG0294	H	Cluster 12498	963.0	False	True	sul2	3000412.0		False	protein:plasmid:19294 Length: 271 # NCBI annotation: SulII # Family: family:all:215 # MgeID: mge:506 # MgeName: pJR1 # Cross-refs: genbank:acc:NP_848165;genbank:gi:30387186;genbank:GeneID:3125795	True	gb|AAL59753.1|sul2 [Vibrio cholerae]	True	{'GO:0044237', 'GO:0042558', 'GO:0004156', 'GO:0009396'}		{'GO:0004156'}	{'GO:0044237', 'GO:0042558', 'GO:0009396'}	{'MetaCyc: PWY-5301', 'Reactome: R-RNO-156581', 'MetaCyc: PWY-8036', 'MetaCyc: PWY-7161', 'KEGG: 00790', 'MetaCyc: PWY-3841', 'MetaCyc: PWY-7784', 'MetaCyc: PWY-5729', 'MetaCyc: PWY-7631', 'MetaCyc: PWY-6795', 'MetaCyc: PWY-7151', 'MetaCyc: PWY-5748', 'MetaCyc: PWY-5305', 'Reactome: R-HSA-196741', 'MetaCyc: PWY-7668', 'MetaCyc: PWY-8047', 'MetaCyc: PWY-7325', 'MetaCyc: PWY-5765', 'MetaCyc: PWY-80…	{'IPR006390', 'IPR000489', 'IPR011005'}	EIH15750.1 dihydropteroate synthase [Escherichia coli 97.0259]		2401
562.23658.con.0001_471|562.23658	COG2704	R	Cluster 5386	74.0	False	False				False		False		False	{'GO:0016021', 'GO:0015740', 'GO:0015556'}	{'GO:0016021'}	{'GO:0015556'}	{'GO:0015740'}		{'IPR004668'}	WP_072666614.1 anaerobic C4-dicarboxylate transporter [Escherichia coli]		2402
562.23661.con.0005_191|562.23661	COG3753	S	Cluster 18623	2930.0	True	False				False		False		False						{'IPR027405', 'IPR009282'}	EQO95562.1 phosphatase YidA [Escherichia coli HVH 55 (4-2646161)]		2403
562.23662.con.0071_1|562.23662			Cluster 35864	43.0	False	False				False	protein:plasmid:119737 Length: 188 # NCBI annotation: single strand DNA-binding protein # Family: family:all:26 # MgeID: mge:774 # MgeName: pUTI89 # Cross-refs: genbank:gi:91206337;genbank:GeneID:3996459	True		False	{'GO:0003697'}		{'GO:0003697'}		{'MetaCyc: PWY-5301', 'Reactome: R-GGA-6782210', 'Reactome: R-HSA-6796648', 'Reactome: R-GGA-68689', 'Reactome: R-RNO-5696400', 'Reactome: R-HSA-3108214', 'Reactome: R-SCE-5358565', 'MetaCyc: PWY-7161', 'Reactome: R-MMU-381042', 'Reactome: R-DDI-76042', 'Reactome: R-DDI-5358565', 'Reactome: R-MMU-72163', 'Reactome: R-HSA-975957', 'Reactome: R-RNO-1799339', 'Reactome: R-HSA-113507', 'Reactome: R-X…	{'IPR012340', 'IPR000424'}	WP_013279298.1 single-stranded DNA-binding protein [Escherichia coli]		2404
[truncated: 2,292 more rows]
