# Supplementary material for: PangenomeNet: a pan-genome-based network reveals functional modules on antimicrobial resistome for Escherichia coli strains
Source: BMC Bioinformatics. 2021 Nov 10;22:548. doi: 10.1186/s12859-021-04459-z (PMC8579557; doi:10.1186/s12859-021-04459-z)
Supplement: Supplementary file 8 — Additional file 8: Table S7. Term enrichment result for the pan-resistome ontology. [file 12859_2021_4459_MOESM8_ESM.xlsx]

## Sheet: p_value
	piperacillin-tazobactam	chloramphenicol	tobramycin	tetracycline	ceftazidime	amoxicillin-clavunate	ciprofloxacin	trimethoprim	ampicillin	ceftriaxone	gentamicin	cefotaxime	streptomycin	meropenem	imipenem	amoxicillin	trimethoprim-sulfamethoxazole	amoxicillin-clavulanate	azithromycin	cefuroxime
S:1357	1	1	1	1	1	1	1	1	1	1	1	1	1	0.534507	1	1	1	1	1	1
S:1358	1	1	1	1	0.379546	1	0.199904	1	1	1	1	1	1	1	1	1	1	1	1	1
S:1359	1	1	1	1	1	1	0.505188	1	1	1	1	1	1	0.100718	1	1	1	1	1	1
S:1360	1	1	1	1	0.379546	1	1	1	1	1	1	0.415026	1	0.534507	1	1	1	1	1	1
S:1361	1	1	1	1	0.379546	1	0.199904	1	1	1	0.367878	0.415026	1	1	1	1	1	1	1	0.289388
S:1362	1	1	1	1	1	1	1	1	1	1	1	1	1	0.534507	1	1	1	1	1	1
S:1363	1	1	1	1	0.379546	1	1	1	1	1	0.367878	1	1	1	1	1	1	1	1	1
S:1364	1	1	1	1	1	1	0.505188	1	1	1	1	1	1	0.100718	1	1	1	1	1	1
S:1365	1	1	1	1	0.379546	1	1	1	1	1	1	1	1	1	1	1	1	1	1	1
S:1366	1	1	1	1	1	1	1	1	1	1	1	1	1	0.100718	1	1	1	1	1	1
S:1367	1	1	1	1	1	1	0.199904	1	1	1	1	1	1	1	1	1	1	1	1	1
S:1368	1	1	1	1	0.379546	1	0.199904	1	1	1	1	1	1	1	1	1	1	1	1	1
S:1369	1	1	1	1	0.379546	1	0.199904	1	1	1	1	1	1	1	1	1	1	1	1	1
S:1370	1	1	1	1	1	0.0552418	0.505188	1	1	1	1	1	1	0.534507	1	1	1	1	1	1
S:1371	1	1	1	1	1	1	0.199904	1	1	1	0.367878	1	1	1	1	1	1	1	1	1
S:1372	1	1	1	1	1	1	0.505188	1	1	1	1	1	1	0.100718	1	1	1	1	1	1
S:1373	1	1	1	1	0.379546	1	0.199904	1	1	1	1	1	1	1	1	1	1	1	1	1
S:1374	1	1	1	1	1	1	1	1	1	1	1	1	1	0.534507	1	1	1	1	1	1
S:1375	1	1	1	1	0.379546	0.0552418	1	1	1	1	1	0.415026	1	1	1	1	1	1	1	0.289388
S:1376	1	1	1	1	0.379546	1	1	1	1	1	1	0.415026	1	0.534507	1	1	1	1	1	1
S:1377	1	1	1	1	0.0449195	1	1	1	1	1	1	1	1	1	1	1	1	1	1	1
S:1378	1	1	1	1	1	1	1	1	1	1	1	1	1	0.534507	1	1	1	1	1	1
S:1379	1	1	1	1	0.379546	0.0552418	0.199904	1	1	1	0.367878	0.415026	1	1	1	1	1	1	1	0.0245401
S:1380	1	1	1	1	1	1	0.199904	1	1	1	1	1	1	0.534507	1	1	1	1	1	1
S:1381	1	1	1	1	0.379546	1	0.199904	1	1	1	0.367878	0.415026	1	1	1	1	1	1	1	1
S:1382	1	1	1	1	1	0.0552418	1	1	1	1	1	1	1	0.534507	1	0.107522	1	1	1	0.289388
S:1383	1	1	1	0.0263628	1	1	0.505188	1	1	1	1	0.415026	1	1	1	1	1	1	1	0.289388
S:1384	1	1	1	1	1	1	0.505188	1	1	1	1	1	1	0.100718	1	1	1	1	1	1
S:1385	1	1	1	1	1	1	0.505188	1	1	1	1	1	1	0.100718	1	1	1	1	1	1
S:1386	1	1	1	1	0.379546	1	1	1	1	1	0.367878	0.415026	1	0.534507	1	1	1	1	1	1
S:1387	1	1	1	1	1	1	0.505188	1	0.0423001	1	1	1	1	0.534507	1	1	1	1	1	1
S:1388	1	1	1	1	1	1	1	1	1	1	0.367878	1	1	0.534507	1	1	1	1	1	1
S:1389	1	1	1	1	1	1	0.505188	1	1	1	1	1	1	0.100718	1	1	1	1	1	1
S:1390	1	1	1	1	0.379546	1	1	1	1	1	0.041849	0.0551288	1	1	1	1	1	1	1	1
S:1391	1	1	1	1	1	1	0.505188	1	1	1	1	0.415026	1	0.534507	1	1	1	1	1	0.289388
S:1392	1	0.0480628	1	1	1	1	1	1	1	1	1	1	1	1	1	1	1	1	1	0.289388
S:1393	1	1	1	1	1	1	1	1	1	1	0.367878	0.415026	1	1	1	1	1	1	1	1
S:1394	1	1	1	1	1	1	1	1	1	1	0.367878	0.415026	1	0.534507	1	1	1	1	1	0.289388
S:1395	1	1	1	1	0.379546	1	0.199904	1	1	1	0.367878	1	1	1	1	1	1	1	1	0.289388
S:1396	1	1	1	1	1	1	0.505188	1	0.0423001	1	1	1	1	0.534507	1	1	1	1	1	1
S:1397	1	1	1	1	1	1	0.505188	1	0.0423001	1	1	1	1	0.534507	1	1	1	1	1	1
S:1398	1	1	1	1	1	1	0.199904	1	1	1	0.367878	0.415026	1	1	1	1	1	1	1	0.289388
S:1399	1	1	1	1	0.379546	1	0.199904	1	1	1	0.367878	0.415026	1	1	1	1	1	1	1	1
S:1400	1	1	1	1	0.379546	1	0.505188	1	1	1	1	1	1	0.100718	1	1	1	1	1	1
S:1401	1	1	1	1	0.379546	1	0.505188	1	1	1	0.367878	1	1	0.534507	1	1	1	1	1	1
S:1402	1	1	1	1	1	1	0.505188	1	1	1	1	1	1	0.100718	1	1	1	1	1	1
S:1403	1	1	1	1	1	1	0.199904	1	1	1	0.041849	0.415026	1	1	1	1	1	1	1	0.289388
S:1404	1	1	1	1	0.379546	1	1	1	1	1	0.367878	0.415026	1	0.534507	1	1	1	1	1	1
S:1405	1	1	1	1	1	1	0.505188	1	1	1	1	1	1	0.534507	1	1	1	1	1	0.289388
S:1406	1	1	1	1	1	1	0.505188	1	1	1	1	1	1	0.100718	1	1	1	1	1	1
S:1407	1	1	1	1	0.379546	1	0.199904	1	1	1	1	0.415026	1	1	1	1	1	1	1	1
S:1408	1	1	1	1	0.379546	1	1	1	1	1	0.367878	0.415026	1	0.534507	1	1	1	1	1	0.289388
S:1409	1	0.0480628	1	1	0.379546	1	0.505188	1	1	1	0.367878	0.415026	1	1	1	0.107522	1	1	1	0.289388
S:1410	1	1	1	1	1	1	0.199904	1	1	1	1	1	1	1	1	1	1	1	1	1
S:1411	1	1	1	1	1	1	1	1	1	1	0.367878	1	1	0.534507	1	1	1	1	1	1
S:1412	1	1	1	1	1	1	1	1	1	1	1	1	1	0.534507	1	1	1	1	1	1
S:1413	1	1	1	1	1	1	0.505188	1	1	1	1	1	1	0.100718	1	1	1	1	1	1
S:1414	1	1	1	1	1	1	0.505188	1	0.000441282	1	1	1	1	1	1	1	1	1	1	1
S:1415	1	1	1	1	1	1	0.505188	1	1	1	1	1	1	0.100718	1	1	1	1	1	1
S:1416	1	1	1	0.0263628	1	1	1	1	1	1	1	1	0.0321734	1	1	0.107522	1	1	1	1
S:1417	1	1	1	1	1	1	0.505188	1	1	1	1	0.415026	1	0.534507	1	1	1	1	1	0.289388
S:1418	1	1	1	1	1	1	0.505188	1	1	1	1	1	1	0.100718	1	1	1	1	1	1
S:1419	1	1	1	1	1	1	1	1	1	1	1	1	1	0.534507	1	1	1	1	1	1
S:1420	1	1	1	1	1	1	0.199904	1	1	1	1	1	1	0.534507	1	1	1	1	1	0.289388
S:1421	1	1	1	1	1	1	1	1	1	1	1	1	1	0.534507	1	1	1	1	1	1
S:1422	1	1	1	0.0263628	1	1	0.505188	1	0.0423001	1	1	1	0.0321734	1	1	1	1	1	1	1
S:1423	1	1	1	1	1	1	0.505188	1	1	1	1	1	1	0.100718	1	1	1	1	1	1
S:1424	1	1	1	1	1	1	1	1	1	1	0.367878	0.0551288	1	1	1	1	1	1	1	0.0245401
S:1425	1	1	1	1	1	1	1	1	1	1	1	1	1	0.534507	1	1	1	1	1	1
S:1426	1	1	1	1	1	1	0.505188	1	1	1	1	1	1	0.100718	1	1	1	1	1	1
S:1427	1	1	1	1	1	1	1	1	1	1	1	1	1	0.534507	1	1	1	1	1	1
S:1428	1	1	1	1	1	1	1	1	1	1	0.041849	0.415026	1	1	1	1	1	1	1	1
S:1429	1	1	1	1	1	1	1	1	1	1	0.367878	0.415026	1	0.534507	1	1	1	1	1	0.289388
S:1430	1	1	1	1	1	1	0.199904	1	1	1	1	1	1	1	1	1	1	1	1	1
S:1431	1	1	1	1	1	1	0.505188	1	0.0423001	1	1	1	1	0.534507	1	1	1	1	1	1
S:1432	1	1	1	0.0263628	0.379546	1	1	1	1	1	0.367878	0.0551288	1	1	1	1	1	1	1	0.289388
S:1433	1	1	1	1	0.379546	1	1	1	1	1	0.367878	0.415026	1	0.534507	1	1	1	1	1	0.289388
S:1434	1	1	1	1	0.379546	1	0.199904	1	1	1	0.367878	1	1	1	1	1	1	1	1	1
S:1435	1	1	1	1	1	1	0.505188	1	1	1	1	0.415026	1	0.534507	1	1	1	1	1	0.289388
S:1436	1	1	0.00147384	1	0.379546	1	1	1	1	1	0.041849	0.415026	1	1	1	0.107522	1	1	1	0.289388
S:1437	1	1	1	1	1	1	1	1	1	1	1	0.415026	1	1	1	1	1	1	1	1
S:1438	1	1	1	1	1	1	0.505188	1	1	1	1	1	1	0.100718	1	1	1	1	1	1
S:1439	1	1	1	1	1	1	0.505188	1	1	1	1	1	1	0.100718	1	1	1	1	1	1
S:1440	1	1	1	1	1	1	1	1	1	1	1	1	1	0.534507	1	1	1	1	1	1
S:1441	1	1	1	1	0.379546	1	0.505188	1	1	1	1	1	1	0.534507	1	1	1	1	1	1
S:1442	1	1	1	1	1	1	0.505188	1	1	1	1	0.415026	1	0.534507	1	1	1	1	1	1
S:1443	1	1	1	1	1	1	0.199904	1	1	1	1	1	1	1	1	1	1	1	1	1
S:1444	0.0190751	1	1	1	0.379546	0.0552418	0.199904	1	1	1	0.041849	0.0551288	1	1	1	0.107522	1	0.00735833	1	0.0245401
S:1445	1	1	1	1	1	1	0.199904	1	1	1	1	1	1	1	1	1	1	1	1	1
S:1446	1	1	1	1	0.379546	0.0552418	0.199904	1	1	1	0.367878	0.415026	1	1	1	1	1	1	1	0.289388
S:1447	1	1	1	1	0.379546	1	1	1	1	1	0.367878	0.415026	1	0.534507	1	1	1	1	1	0.289388
S:1448	1	1	1	1	1	1	1	1	1	1	1	1	1	0.534507	1	1	1	1	1	1
S:1449	1	0.0712465	1	1	0.115796	1	0.257782	1	1	1	0.497568	0.552743	1	0.555806	1	1	1	1	1	0.401093
S:1450	1	0.0712465	1	1	1	1	0.257782	0.0197796	1	0.0349822	0.497568	0.552743	1	1	1	1	1	1	1	1
S:1451	1	1	1	1	1	1	0.589726	1	1	1	0.497568	0.552743	1	1	1	1	1	1	1	0.401093
S:1452	1	1	1	1	1	1	1	1	0.062797	1	0.497568	0.552743	1	1	1	1	1	1	1	0.401093
S:1453	0.0284862	1	1	1	0.115796	0.0817369	0.257782	1	1	1	0.497568	0.552743	1	1	1	1	1	1	1	0.401093
S:1454	1	1	1	1	0.511421	1	0.589726	1	1	1	1	1	1	1	1	1	1	1	1	1
S:1455	1	1	1	1	0.511421	1	0.257782	1	1	1	1	0.139592	1	0.555806	1	0.156921	1	1	1	0.401093
S:1456	0.0284862	1	1	1	0.00948116	1	0.257782	1	1	1	1	0.552743	1	0.555806	1	0.156921	1	1	1	0.401093
S:1457	1	1	1	0.0392967	0.115796	1	0.589726	1	1	1	0.108499	0.139592	0.0478872	0.555806	1	0.00872347	1	1	0.0219611	0.0659775
S:1458	1	1	1	1	1	1	0.0892561	1	1	1	1	1	1	0.555806	1	1	1	1	1	1
S:1459	1	1	1	1	1	1	0.589726	1	1	1	0.497568	1	1	0.555806	1	1	1	1	1	1
S:1460	1	1	1	1	1	1	0.257782	1	1	1	1	1	1	0.0318878	1	1	1	1	1	1
S:1461	1	1	1	1	1	1	0.0892561	1	1	1	0.497568	1	1	0.555806	1	1	1	1	1	1
S:1462	1	1	1	1	0.511421	1	0.257782	1	1	1	1	1	1	0.238378	1	1	1	1	1	1
S:1463	1	1	1	1	1	1	1	1	1	1	1	1	1	0.238378	1	1	1	1	1	1
S:1464	1	1	1	1	1	1	0.589726	1	1	1	0.497568	1	1	1	1	1	1	1	1	1
S:1465	1	1	1	1	1	0.0817369	1	1	0.062797	1	1	0.139592	1	0.555806	1	1	1	1	1	0.0659775
S:1466	1	1	1	1	1	1	1	1	1	1	0.108499	0.552743	1	0.555806	1	1	1	1	1	1
S:1467	1	1	1	1	0.511421	1	1	1	1	1	0.497568	0.552743	1	0.238378	1	1	1	1	1	0.401093
S:1468	1	1	1	1	1	1	0.257782	1	1	1	1	0.552743	1	0.238378	1	1	1	1	1	1
S:1469	1	1	1	1	1	1	1	1	1	1	1	1	1	0.238378	1	1	1	1	1	1
S:1470	1	1	1	1	1	1	1	1	1	1	0.497568	0.552743	1	0.238378	1	1	1	1	1	0.401093
S:1471	1	1	1	1	1	1	0.0892561	1	1	1	1	1	1	0.238378	1	1	1	1	1	1
S:1472	1	1	1	1	1	1	1	1	1	1	0.497568	0.552743	1	1	1	1	1	1	1	0.401093
S:1473	1	1	1	1	0.511421	1	0.589726	1	1	1	1	1	1	1	1	1	1	1	1	1
S:1474	1	1	1	1	1	1	0.0892561	1	1	1	1	1	1	1	1	1	1	1	1	1
S:1475	1	1	1	0.0392967	1	1	0.257782	0.0197796	1	0.0349822	0.497568	0.552743	0.0478872	1	1	0.156921	1	1	1	1
S:1476	1	1	1	1	0.511421	1	1	1	1	1	1	0.552743	1	1	1	1	1	1	1	1
S:1477	1	1	1	1	0.511421	1	0.257782	1	1	1	1	0.552743	1	0.238378	1	1	1	1	1	1
S:1478	1	1	1	1	1	1	0.257782	1	1	1	1	0.552743	1	0.238378	1	1	1	1	1	1
S:1479	1	1	1	0.0392967	1	1	1	1	1	1	1	1	0.0478872	1	1	1	1	1	1	1
S:1480	1	1	1	1	0.00948116	1	0.0892561	1	0.062797	0.00038859	0.497568	0.0128973	1	0.555806	1	1	1	1	1	1
S:1481	1	1	1	1	0.511421	1	0.589726	1	1	1	0.497568	0.139592	1	1	1	1	1	1	1	0.0659775
S:1482	1	1	1	1	1	1	0.589726	1	1	1	1	1	1	0.555806	1	1	1	1	1	0.401093
S:1483	1	1	1	1	0.511421	1	1	1	1	1	1	1	1	1	1	1	1	1	1	1
S:1484	1	1	1	1	1	1	0.257782	1	1	1	1	0.552743	1	0.238378	1	1	1	1	1	1
S:1485	1	1	1	1	1	1	0.257782	1	1	1	1	1	1	0.0318878	1	1	1	1	1	1
S:1486	0.0284862	1	1	1	0.511421	1	0.589726	1	1	1	0.497568	0.139592	1	0.555806	1	1	1	1	1	0.0659775
S:1487	1	1	1	1	0.511421	1	0.589726	1	1	1	1	0.139592	1	0.555806	1	1	1	1	1	1
S:1488	1	1	1	1	1	0.0817369	0.589726	1	1	1	1	1	1	1	1	1	1	1	1	0.401093
S:1489	1	1	1	1	1	1	1	1	1	1	1	1	1	0.238378	1	1	1	1	1	1
S:1490	1	1	1	1	1	1	1	1	1	1	1	0.552743	1	1	1	1	1	1	1	1
S:1491	1	1	1	1	1	1	0.257782	1	1	1	0.497568	0.552743	1	0.238378	1	1	1	1	1	1
S:1492	1	1	1	1	0.511421	1	0.589726	1	1	1	1	1	1	1	1	1	1	1	1	1
S:1493	1	1	1	1	0.511421	1	0.0892561	1	1	1	0.497568	0.552743	1	0.555806	1	1	1	1	1	1
S:1494	1	1	1	1	0.511421	1	1	1	0.062797	1	0.497568	0.552743	1	1	1	1	1	1	1	0.401093
S:1495	1	1	1	1	0.511421	1	1	1	1	1	1	1	1	1	1	1	1	1	1	1
S:1496	1	1	1	1	0.511421	0.0817369	0.257782	1	1	1	0.497568	0.139592	1	0.555806	1	1	1	1	1	0.0659775
S:1497	1	1	1	1	0.511421	1	0.589726	1	1	1	1	1	1	1	1	1	1	1	1	1
S:1498	1	1	1	1	0.511421	1	0.0892561	1	1	1	0.497568	0.552743	1	0.555806	1	1	1	1	1	0.401093
S:1499	1	1	1	1	1	1	0.257782	1	0.00130626	1	1	1	1	1	1	1	1	1	1	1
S:1500	1	1	1	1	0.199655	1	0.0398159	1	0.08287	0.0463857	1	0.236624	1	0.313698	1	1	1	1	1	1
S:1501	0.0378139	1	1	1	1	0.107508	0.0398159	1	1	1	1	0.236624	1	0.313698	1	0.20362	1	0.0146733	1	0.118448
S:1502	1	1	1	1	1	1	1	1	1	1	0.587368	1	1	0.59583	1	1	1	1	1	0.118448
S:1503	1	1	1	1	1	1	0.330552	1	1	1	1	1	1	1	1	1	1	1	1	0.495308
S:1504	1	1	1	1	0.199655	0.107508	0.632753	1	0.00257786	0.0463857	1	1	1	0.59583	0.00588884	0.000624053	1	1	1	0.495308
S:1505	1	1	1	1	0.199655	1	0.0398159	1	1	1	0.188094	0.236624	1	0.313698	1	1	1	1	1	0.495308
S:1506	1	1	1	1	1	1	0.0398159	1	1	1	0.587368	1	1	0.0973119	1	1	1	1	1	1
S:1507	1	1	1	1	1	1	0.132791	1	1	1	0.587368	1	1	0.59583	1	1	1	1	1	1
S:1508	1	1	1	1	0.0319377	1	0.330552	1	1	1	1	1	1	0.59583	1	1	1	1	1	1
S:1509	1	0.0938823	1	1	1	1	1	1	1	1	0.587368	1	1	0.313698	1	1	1	1	1	0.495308
S:1510	1	1	1	1	0.584311	1	0.132791	1	1	1	0.587368	0.578508	1	0.0100797	1	1	1	1	1	1
S:1511	1	1	1	1	0.584311	1	0.132791	1	1	1	0.587368	0.578508	1	0.0100797	1	1	1	1	1	1
S:1512	1	1	1	1	1	1	1	1	1	1	0.188094	0.236624	1	1	1	1	1	1	1	0.495308
S:1513	1	1	1	1	0.584311	1	0.132791	1	1	1	0.587368	0.578508	1	0.0100797	1	1	1	1	1	1
S:1514	1	1	1	1	1	0.107508	1	1	1	1	0.188094	0.236624	1	1	1	0.20362	1	1	1	0.495308
S:1515	1	1	1	0.0520683	1	1	0.632753	0.0262951	1	1	1	1	0.0633573	1	1	1	0.00588884	1	1	0.495308
S:1516	1	1	1	1	1	1	0.632753	1	1	1	0.587368	0.578508	1	0.0973119	1	1	1	1	1	1
S:1517	1	1	1	1	0.584311	1	0.330552	1	1	1	0.587368	1	1	0.313698	1	1	1	1	1	0.495308
S:1518	1	1	1	1	0.584311	1	0.132791	1	1	1	0.587368	0.578508	1	0.0100797	1	1	1	1	1	1
S:1519	1	1	1	1	0.584311	1	0.632753	1	1	1	1	1	1	0.59583	1	1	1	1	1	1
S:1520	0.0470589	0.115983	1	1	0.06739	0.00724273	1	1	0.00423948	0.0576627	1	0.335689	1	0.65535	0.00735833	4.139e-05	1	0.0183145	1	0.177497
S:1521	1	0.115983	1	1	0.287831	1	0.661615	0.0327721	1	0.0576627	1	0.335689	1	1	1	0.247766	1	1	0.0363598	0.574761
S:1522	1	0.115983	1	1	0.287831	1	0.0690086	1	1	1	1	1	1	0.65535	1	1	1	1	1	0.574761
S:1523	1	1	1	1	1	1	0.661615	1	1	1	1	1	1	0.65535	1	1	1	1	1	0.574761
S:1524	1	1	1	1	0.287831	1	0.661615	1	1	1	0.589808	0.596966	1	0.65535	1	1	1	1	1	1
S:1525	1	1	1	1	0.287831	0.132574	0.661615	1	1	1	1	0.335689	1	0.65535	1	1	1	1	1	1
S:1526	1	1	1	1	0.06739	1	0.179363	1	1	1	1	0.596966	1	0.18513	1	1	1	1	1	1
S:1527	1	1	1	1	0.590609	1	1	1	1	1	0.589808	0.335689	1	1	1	1	1	1	1	0.574761
S:1528	0.0470589	1	1	1	0.287831	1	0.179363	1	1	1	1	0.335689	1	0.18513	1	0.247766	1	1	1	0.574761
S:1529	1	1	1	1	0.590609	1	0.387922	1	1	1	0.589808	0.596966	1	0.0376742	1	1	1	1	1	1
S:1530	1	0.115983	1	1	0.590609	1	1	1	1	1	0.589808	1	1	1	1	1	1	1	1	0.574761
S:1531	1	1	1	1	1	1	0.387922	1	1	1	0.272572	1	1	1	1	0.0270395	1	1	0.0363598	1
S:1532	1	1	1	1	0.590609	1	0.661615	1	1	1	0.589808	0.596966	1	0.65535	1	1	1	1	1	1
S:1533	1	1	1	1	0.590609	1	1	1	1	1	0.589808	0.596966	1	0.334224	1	1	1	1	1	1
S:1534	1	1	1	1	0.590609	1	0.661615	1	1	1	1	1	1	0.65535	1	1	1	1	1	0.574761
S:1535	1	1	1	0.0646793	0.590609	1	0.387922	1	1	1	1	0.596966	1	0.65535	1	1	1	1	0.0363598	1
S:1536	1	1	1	1	0.590609	1	0.387922	1	1	1	1	1	1	0.65535	1	0.247766	1	1	1	1
S:1537	1	1	1	1	0.590609	1	1	1	1	1	0.272572	0.335689	1	0.334224	1	1	1	1	1	1
S:1538	1	1	1	1	1	1	1	1	1	1	1	0.335689	1	0.334224	1	1	1	1	1	0.574761
S:1539	1	1	1	1	0.590609	1	0.661615	1	1	1	0.272572	0.335689	1	1	1	1	1	1	1	0.574761
S:1540	1	1	1	1	1	1	0.0690086	1	1	1	0.589808	0.596966	0.0024374	0.334224	1	1	1	1	1	1
S:1541	1	1	1	1	0.352303	1	0.0361493	1	1	1	0.608618	0.630115	1	0.389113	1	1	1	1	1	1
S:1542	1	1	1	1	0.352303	1	0.0361493	1	1	1	0.356495	0.345726	1	0.00100233	1	1	1	1	1	0.598035
S:1543	1	1	1	1	0.114022	0.0106727	0.0952117	1	0.121778	0.0019031	0.00174967	0.0299589	1	0.185322	0.00882673	0.0391206	1	1	1	0.00683379
S:1544	1	1	1	1	0.613017	1	1	1	1	1	1	1	1	0.671155	1	1	1	1	1	1
S:1545	0.0562217	1	1	1	1	1	0.416712	1	1	1	1	0.630115	1	0.671155	1	1	1	1	1	0.23979
S:1546	1	0.13756	1	1	0.613017	1	0.697156	1	1	1	0.608618	0.630115	1	0.671155	1	0.289495	1	1	1	1
S:1547	1	1	1	1	0.613017	0.156955	1	1	0.121778	0.0688146	0.608618	0.630115	1	0.389113	1	0.289495	1	1	1	0.23979
S:1548	1	0.158626	1	1	0.64443	1	1	0.0456113	1	0.0798427	0.637009	0.365318	1	1	1	0.328938	1	1	0.0505673	1
S:1549	1	1	1	1	1	1	1	1	0.00866888	1	1	1	1	0.442156	1	1	1	1	1	1
S:1550	1	1	1	1	1	0.180667	1	1	1	1	0.356146	1	0.108341	1	1	0.00483552	1	1	1	0.604631
S:1551	1	1	1	1	1	1	0.706963	1	1	1	0.637009	0.670042	1	1	1	1	1	1	1	0.0820986
S:1552	1	1	1	1	0.169214	0.180667	0.138618	1	1	0.0798427	1	0.0571235	1	1	1	0.328938	1	1	1	0.0820986
S:1553	1	1	1	1	1	1	0.138618	1	1	1	1	1	0.00501855	0.685808	1	0.328938	1	1	1	1
S:1554	1	1	1	1	1	1	1	1	1	1	1	0.670042	1	0.217838	1	1	1	1	1	1
S:1555	1	0.158626	1	1	1	1	0.138618	1	1	1	0.356146	1	1	0.685808	1	1	1	1	1	0.302867
S:1556	1	1	1	1	0.169214	1	1	1	1	1	0.155997	1	1	0.104855	1	1	1	1	1	1
S:1557	1	0.158626	1	1	0.356699	1	1	1	1	1	0.155997	0.670042	1	0.442156	1	1	1	1	1	1
S:1558	1	1	1	1	0.356699	1	0.706963	1	1	1	1	0.670042	1	1	1	1	1	1	1	0.302867
S:1559	0.0653033	1	1	1	0.64443	1	1	1	1	1	0.637009	0.670042	1	0.442156	1	1	1	1	1	1
S:1560	1	1	1	1	0.215108	1	0.0817023	1	1	1	0.670273	0.689106	1	0.0150099	1	1	1	1	1	1
S:1561	1	1	1	1	0.0676198	0.20373	0.478698	1	0.15909	1	0.0113329	0.0935693	0.122872	0.0615748	1	0.366219	1	1	1	0.0245899
S:1562	1	1	1	1	0.215108	1	0.0817023	1	0.15909	1	0.372351	0.689106	1	0.118752	1	1	1	1	1	1
S:1563	1	1	1	0.000105471	0.377659	1	1	1	1	1	0.213418	0.0935693	1	0.0615748	1	0.0679692	1	1	0.0576001	1
S:1564	1	1	1	1	0.0676198	1	0.00156218	1	0.0114058	0.00350375	0.670273	0.0935693	1	0.447953	1	1	1	1	1	0.619107
S:1565	1	0.179193	1	1	0.377659	1	0.737786	1	1	1	0.213418	0.400838	1	1	1	0.366219	1	1	1	1
S:1566	1	1	1	1	0.680025	0.20373	0.478698	1	1	1	0.670273	1	1	0.714202	1	1	1	1	1	1
S:1567	1	1	1	1	0.680025	1	0.309364	1	0.15909	1	0.670273	1	1	0.118752	1	1	1	1	1	0.364954
S:1568	1	1	1	1	1	0.20373	0.309364	0.0519739	0.15909	1	0.213418	1	1	0.447953	1	0.366219	1	1	1	1
S:1569	1	1	1	1	0.217962	1	0.738991	1	1	1	0.400552	1	0.137176	0.476738	1	1	1	1	1	0.638836
S:1570	1	1	1	1	0.410275	0.22616	0.0132196	1	1	1	0.0915109	0.227186	1	0.0647536	1	1	1	1	1	0.00668503
S:1571	1	0.199272	1	0.113557	0.00408781	0.22616	0.738991	1	0.177168	0.101533	0.695327	0.446356	0.137176	0.286673	1	0.000879079	1	0.0327721	1	1
S:1572	1	1	1	0.00566488	1	1	0.313388	1	1	1	1	1	0.0084354	0.286673	1	0.010707	1	1	0.0645861	0.638836
S:1573	1	1	1	1	0.698322	1	0.199807	1	0.194869	1	0.228974	0.467948	1	0.304167	1	1	1	1	1	1
S:1574	1	1	1	1	1	0.247974	0.35684	1	1	1	1	0.70765	1	1	1	1	1	1	1	0.661818
S:1575	1	1	1	1	0.698322	0.247974	0.199807	0.0645861	0.194869	1	0.436911	1	1	1	1	0.434757	1	1	1	1
S:1576	1	1	1	1	0.233838	1	0.35684	1	1	1	0.436911	0.257521	1	0.183755	1	1	1	1	1	0.197612
S:1577	1	0.0275077	1	1	0.70957	0.26919	0.763221	0.070836	1	0.00674145	1	0.726774	1	0.750611	1	0.00211439	1	0.0399367	1	0.686548
S:1578	0.100829	1	1	1	1	1	0.234867	1	1	1	0.478136	0.0769567	1	0.189494	1	0.466229	1	1	1	0.230689
S:1579	1	1	1	1	1	1	0.234867	1	1	1	0.0545247	0.0251542	1	0.189494	1	1	1	1	1	0.0187241
S:1580	1	1	1	1	0.70957	1	0.363216	1	1	1	1	0.474503	1	0.340433	1	0.466229	1	1	1	0.686548
S:1581	1	1	1	1	0.478693	1	0.563837	1	1	1	0.719236	1	1	0.535314	1	0.495971	1	1	1	0.703781
S:1582	1	1	1	1	1	1	0.563837	1	1	1	0.477831	0.314277	0.0150154	0.535314	1	0.495971	1	1	1	1
S:1583	1	1	1	1	0.491707	1	1	1	1	1	0.317148	1	1	0.246717	1	0.524077	1	1	1	0.133089
S:1584	0.11812	0.27493	1	1	0.164802	1	0.00877478	0.0832248	1	0.143482	1	0.199189	1	0.765459	1	0.158703	1	1	1	0.441938
S:1585	1	1	1	0.0118934	1	1	0.0239395	1	1	1	1	0.744004	0.0175721	0.0735997	1	0.0310667	1	1	0.0920661	1
S:1586	1	1	1	1	0.164802	0.309886	0.782419	1	1	1	1	1	0.192199	0.765459	1	0.00420817	1	0.0470589	1	0.441938
S:1587	1	1	1	1	0.511828	1	0.59491	1	0.26207	1	1	0.540128	1	0.775965	1	0.550635	1	1	1	1
S:1588	1	1	1	1	1	0.348373	0.604314	1	1	1	0.748771	1	1	0.412484	1	1	1	1	1	0.274467
S:1589	1	0.0494295	1	1	0.750253	0.348373	0.604314	1	1	1	1	0.21574	1	0.0470678	1	1	1	1	1	0.489636
S:1590	0.135104	0.310112	1	1	0.537248	0.348373	1	1	1	1	0.748771	1	1	0.412484	1	1	1	1	1	0.717674
S:1591	1	1	1	1	0.545742	1	0.00408798	1	1	1	0.754157	0.551482	1	0.598415	1	1	1	1	1	0.0913139
S:1592	1	0.327077	1	1	0.123624	0.366824	0.320504	1	1	1	1	0.775632	0.23125	0.598415	1	0.220064	1	1	0.112197	0.728073
S:1593	1	1	1	1	1	1	1	1	1	1	1	0.388279	1	1	1	0.619155	1	1	1	1
S:1594	1	1	1	1	1	1	0.0888768	1	1	1	0.365292	1	1	0.192998	1	0.619155	1	1	1	1
S:1595	1	1	1	1	1	1	0.0119443	1	1	1	0.762695	0.253871	1	0.794922	1	0.619155	1	1	1	0.167413
S:1596	1	1	1	0.0224308	1	1	0.812226	1	1	1	0.0719083	0.0476023	1	0.0731198	1	0.262031	1	1	0.125393	0.183428
S:1597	1	1	1	1	0.448639	1	0.538543	1	1	1	0.447403	0.0898405	1	0.515864	1	0.386633	1	1	1	0.408692
S:1598	1	0.462621	1	1	0.0270449	0.153221	0.227008	1	0.0977277	0.258581	0.324261	0.81452	0.0601091	0.829464	1	0.156217	1	1	0.170202	0.576237
S:1599	0.00140048	0.121592	1	1	0.456946	1	0.839852	1	1	1	0.206313	0.0579349	1	0.00826073	1	0.644911	1	1	1	0.263547
S:1600	1	0.462621	1	1	1	1	0.105534	1	1	1	0.802555	0.479454	1	0.389338	1	1	1	1	1	0.263547
S:1601	0.0278362	1	1	1	0.0642834	1	0.248785	1	1	1	0.487656	0.0223782	1	0.0623923	1	1	1	1	1	0.0669858
S:1602	1	1	1	0.000364635	0.64057	0.183422	1	1	1	1	0.634943	0.823466	0.370177	0.540773	1	0.00331698	1	0.0991384	0.0166853	0.605254
S:1603	1	1	1	1	0.485889	0.552199	0.0873818	1	1	1	0.634943	0.366322	0.370177	0.220396	1	1	1	1	1	0.791681
S:1604	0.245797	0.0311328	1	0.32384	1	1	0.135439	1	1	1	0.487754	0.65759	1	0.545472	1	1	1	1	1	1
S:1605	0.0029044	0.181299	1	1	0.660919	1	0.591755	1	1	1	0.271458	0.14369	1	0.0196574	1	0.695646	1	1	1	0.622411
S:1606	1	0.0402229	1	1	0.830182	1	0.209698	0.193796	0.147584	1	1	0.67395	1	0.449559	1	1	0.0466238	1	1	0.460661
S:1607	1	1	1	1	0.518766	1	0.597441	1	1	1	1	0.838545	1	0.573096	1	0.4232	1	1	1	1
S:1608	0.289104	0.00892162	1	0.377096	1	0.621871	0.301816	0.210125	1	1	1	0.310848	1	0.716843	1	0.71785	1	1	0.230634	0.813481
S:1609	0.343281	0.0183273	1	0.441963	1	0.630046	0.437009	0.252242	1	1	0.441252	0.198715	1	0.622444	1	0.510423	1	1	0.276095	0.391149
S:1610	1	1	1	1	0.35643	0.634344	0.129071	1	0.62174	1	0.710629	0.720893	1	0.254494	1	1	1	1	1	0.213772
S:1611	0.381383	0.336283	1	1	0.212833	0.644938	1	1	0.281899	0.446655	0.152142	0.608112	0.187045	0.532073	1	0.749248	1	1	0.308588	0.106292
S:1612	0.100523	1	1	1	0.245077	0.671894	0.344648	1	1	0.142872	0.244674	0.87331	0.613882	1	1	0.366307	1	1	1	0.578482
S:1613	1	0.400129	1	1	1	0.699162	0.898241	1	1	1	0.873974	0.763531	1	0.130543	1	1	1	1	1	0.377905
S:1614	1	1	1	1	0.278304	1	0.611972	1	0.395643	1	0.754833	0.766323	1	0.100534	1	1	1	1	1	0.380423
S:1615	0.499255	0.410474	1	1	0.654367	0.257901	0.217491	1	0.658601	1	0.000186258	0.0133504	0.624168	0.0248175	1	0.175393	1	1	1	0.0169972
S:1616	1	0.718501	1	0.623742	0.102628	0.509127	0.220168	1	1	0.618121	0.682175	1	1	0.0950287	1	0.473759	1	1	1	0.649163
S:1617	1	0.614228	1	1	0.70626	1	0.0525498	1	0.175432	0.71726	0.390355	0.317613	0.030254	0.215802	1	0.615199	0.269363	1	0.64542	0.671911
S:1618	0.166344	0.859159	1	0.48232	0.686453	0.405213	0.618499	0.742152	0.707987	0.074331	0.0170975	0.00115858	0.126515	0.408075	0.512903	0.718956	1	1	0.336361	0.0189385
S:1619	0.1097	0.654449	1	1	0.00535264	0.683305	0.691103	1	1	0.516973	0.869907	1	0.62052	1	0.0865065	0.376247	1	1	1	0.363002
S:1620	1	1	1	1	1	1	1	1	1	1	1	1	1	1	1	1	1	1	1	1

## Sheet: odds_ratio
	piperacillin-tazobactam	chloramphenicol	tobramycin	tetracycline	ceftazidime	amoxicillin-clavunate	ciprofloxacin	trimethoprim	ampicillin	ceftriaxone	gentamicin	cefotaxime	streptomycin	meropenem	imipenem	amoxicillin	trimethoprim-sulfamethoxazole	amoxicillin-clavulanate	azithromycin	cefuroxime
S:1357	0	0	0	0	0	0	1.23597	0	0	0	0	0	0	2.15116	0	0	0	0	0	0
S:1358	0	0	0	0	3.72125	0	inf	0	0	0	0	0	0	0	0	0	0	0	0	0
S:1359	0	0	0	0	0	0	0	0	0	0	0	0	0	inf	0	0	0	0	0	0
S:1360	0	0	0	0	3.72125	0	1.23597	0	0	0	0	3.26101	0	2.15116	0	0	0	0	0	0
S:1361	0	0	0	0	3.72125	0	inf	0	0	0	3.8917	3.26101	0	0	0	0	0	0	0	5.39151
S:1362	0	0	0	0	0	0	1.23597	0	0	0	0	0	0	2.15116	0	0	0	0	0	0
S:1363	0	0	0	0	3.72125	0	1.23597	0	0	0	3.8917	0	0	0	0	0	0	0	0	0
S:1364	0	0	0	0	0	0	0	0	0	0	0	0	0	inf	0	0	0	0	0	0
S:1365	0	0	0	0	3.72125	0	1.23597	0	0	0	0	0	0	0	0	0	0	0	0	0
S:1366	0	0	0	0	0	0	1.23597	0	0	0	0	0	0	inf	0	0	0	0	0	0
S:1367	0	0	0	0	0	0	inf	0	0	0	0	0	0	0	0	0	0	0	0	0
S:1368	0	0	0	0	3.72125	0	inf	0	0	0	0	0	0	0	0	0	0	0	0	0
S:1369	0	0	0	0	3.72125	0	inf	0	0	0	0	0	0	0	0	0	0	0	0	0
S:1370	0	0	0	0	0	35.6216	0	0	0	0	0	0	0	2.15116	0	0	0	0	0	0
S:1371	0	0	0	0	0	0	inf	0	0	0	3.8917	0	0	0	0	0	0	0	0	0
S:1372	0	0	0	0	0	0	0	0	0	0	0	0	0	inf	0	0	0	0	0	0
S:1373	0	0	0	0	3.72125	0	inf	0	0	0	0	0	0	0	0	0	0	0	0	0
S:1374	0	0	0	0	0	0	1.23597	0	0	0	0	0	0	2.15116	0	0	0	0	0	0
S:1375	0	0	0	0	3.72125	35.6216	1.23597	0	0	0	0	3.26101	0	0	0	0	0	0	0	5.39151
S:1376	0	0	0	0	3.72125	0	1.23597	0	0	0	0	3.26101	0	2.15116	0	0	0	0	0	0
S:1377	0	0	0	0	inf	0	1.23597	0	0	0	0	0	0	0	0	0	0	0	0	0
S:1378	0	0	0	0	0	0	1.23597	0	0	0	0	0	0	2.15116	0	0	0	0	0	0
S:1379	0	0	0	0	3.72125	35.6216	inf	0	0	0	3.8917	3.26101	0	0	0	0	0	0	0	inf
S:1380	0	0	0	0	0	0	inf	0	0	0	0	0	0	2.15116	0	0	0	0	0	0
S:1381	0	0	0	0	3.72125	0	inf	0	0	0	3.8917	3.26101	0	0	0	0	0	0	0	0
S:1382	0	0	0	0	0	35.6216	1.23597	0	0	0	0	0	0	2.15116	0	17.3108	0	0	0	5.39151
S:1383	0	0	0	78.7059	0	0	0	0	0	0	0	3.26101	0	0	0	0	0	0	0	5.39151
S:1384	0	0	0	0	0	0	0	0	0	0	0	0	0	inf	0	0	0	0	0	0
S:1385	0	0	0	0	0	0	0	0	0	0	0	0	0	inf	0	0	0	0	0	0
S:1386	0	0	0	0	3.72125	0	1.23597	0	0	0	3.8917	3.26101	0	2.15116	0	0	0	0	0	0
S:1387	0	0	0	0	0	0	0	0	47.3929	0	0	0	0	2.15116	0	0	0	0	0	0
S:1388	0	0	0	0	0	0	1.23597	0	0	0	3.8917	0	0	2.15116	0	0	0	0	0	0
S:1389	0	0	0	0	0	0	0	0	0	0	0	0	0	inf	0	0	0	0	0	0
S:1390	0	0	0	0	3.72125	0	1.23597	0	0	0	inf	inf	0	0	0	0	0	0	0	0
S:1391	0	0	0	0	0	0	0	0	0	0	0	3.26101	0	2.15116	0	0	0	0	0	5.39151
S:1392	0	41.3438	0	0	0	0	1.23597	0	0	0	0	0	0	0	0	0	0	0	0	5.39151
S:1393	0	0	0	0	0	0	1.23597	0	0	0	3.8917	3.26101	0	0	0	0	0	0	0	0
S:1394	0	0	0	0	0	0	1.23597	0	0	0	3.8917	3.26101	0	2.15116	0	0	0	0	0	5.39151
S:1395	0	0	0	0	3.72125	0	inf	0	0	0	3.8917	0	0	0	0	0	0	0	0	5.39151
S:1396	0	0	0	0	0	0	0	0	47.3929	0	0	0	0	2.15116	0	0	0	0	0	0
S:1397	0	0	0	0	0	0	0	0	47.3929	0	0	0	0	2.15116	0	0	0	0	0	0
S:1398	0	0	0	0	0	0	inf	0	0	0	3.8917	3.26101	0	0	0	0	0	0	0	5.39151
S:1399	0	0	0	0	3.72125	0	inf	0	0	0	3.8917	3.26101	0	0	0	0	0	0	0	0
S:1400	0	0	0	0	3.72125	0	0	0	0	0	0	0	0	inf	0	0	0	0	0	0
S:1401	0	0	0	0	3.72125	0	0	0	0	0	3.8917	0	0	2.15116	0	0	0	0	0	0
S:1402	0	0	0	0	0	0	0	0	0	0	0	0	0	inf	0	0	0	0	0	0
S:1403	0	0	0	0	0	0	inf	0	0	0	inf	3.26101	0	0	0	0	0	0	0	5.39151
S:1404	0	0	0	0	3.72125	0	1.23597	0	0	0	3.8917	3.26101	0	2.15116	0	0	0	0	0	0
S:1405	0	0	0	0	0	0	0	0	0	0	0	0	0	2.15116	0	0	0	0	0	5.39151
S:1406	0	0	0	0	0	0	0	0	0	0	0	0	0	inf	0	0	0	0	0	0
S:1407	0	0	0	0	3.72125	0	inf	0	0	0	0	3.26101	0	0	0	0	0	0	0	0
S:1408	0	0	0	0	3.72125	0	1.23597	0	0	0	3.8917	3.26101	0	2.15116	0	0	0	0	0	5.39151
S:1409	0	41.3438	0	0	3.72125	0	0	0	0	0	3.8917	3.26101	0	0	0	17.3108	0	0	0	5.39151
S:1410	0	0	0	0	0	0	inf	0	0	0	0	0	0	0	0	0	0	0	0	0
S:1411	0	0	0	0	0	0	1.23597	0	0	0	3.8917	0	0	2.15116	0	0	0	0	0	0
S:1412	0	0	0	0	0	0	1.23597	0	0	0	0	0	0	2.15116	0	0	0	0	0	0
S:1413	0	0	0	0	0	0	0	0	0	0	0	0	0	inf	0	0	0	0	0	0
S:1414	0	0	0	0	0	0	0	0	inf	0	0	0	0	0	0	0	0	0	0	0
S:1415	0	0	0	0	0	0	0	0	0	0	0	0	0	inf	0	0	0	0	0	0
S:1416	0	0	0	78.7059	0	0	1.23597	0	0	0	0	0	63.5238	0	0	17.3108	0	0	0	0
S:1417	0	0	0	0	0	0	0	0	0	0	0	3.26101	0	2.15116	0	0	0	0	0	5.39151
S:1418	0	0	0	0	0	0	0	0	0	0	0	0	0	inf	0	0	0	0	0	0
S:1419	0	0	0	0	0	0	1.23597	0	0	0	0	0	0	2.15116	0	0	0	0	0	0
S:1420	0	0	0	0	0	0	inf	0	0	0	0	0	0	2.15116	0	0	0	0	0	5.39151
S:1421	0	0	0	0	0	0	1.23597	0	0	0	0	0	0	2.15116	0	0	0	0	0	0
S:1422	0	0	0	78.7059	0	0	0	0	47.3929	0	0	0	63.5238	0	0	0	0	0	0	0
S:1423	0	0	0	0	0	0	0	0	0	0	0	0	0	inf	0	0	0	0	0	0
S:1424	0	0	0	0	0	0	1.23597	0	0	0	3.8917	inf	0	0	0	0	0	0	0	inf
S:1425	0	0	0	0	0	0	1.23597	0	0	0	0	0	0	2.15116	0	0	0	0	0	0
S:1426	0	0	0	0	0	0	0	0	0	0	0	0	0	inf	0	0	0	0	0	0
S:1427	0	0	0	0	0	0	1.23597	0	0	0	0	0	0	2.15116	0	0	0	0	0	0
S:1428	0	0	0	0	0	0	1.23597	0	0	0	inf	3.26101	0	0	0	0	0	0	0	0
S:1429	0	0	0	0	0	0	1.23597	0	0	0	3.8917	3.26101	0	2.15116	0	0	0	0	0	5.39151
S:1430	0	0	0	0	0	0	inf	0	0	0	0	0	0	0	0	0	0	0	0	0
S:1431	0	0	0	0	0	0	0	0	47.3929	0	0	0	0	2.15116	0	0	0	0	0	0
S:1432	0	0	0	78.7059	3.72125	0	1.23597	0	0	0	3.8917	inf	0	0	0	0	0	0	0	5.39151
S:1433	0	0	0	0	3.72125	0	1.23597	0	0	0	3.8917	3.26101	0	2.15116	0	0	0	0	0	5.39151
S:1434	0	0	0	0	3.72125	0	inf	0	0	0	3.8917	0	0	0	0	0	0	0	0	0
S:1435	0	0	0	0	0	0	0	0	0	0	0	3.26101	0	2.15116	0	0	0	0	0	5.39151
S:1436	0	0	inf	0	3.72125	0	1.23597	0	0	0	inf	3.26101	0	0	0	17.3108	0	0	0	5.39151
S:1437	0	0	0	0	0	0	1.23597	0	0	0	0	3.26101	0	0	0	0	0	0	0	0
S:1438	0	0	0	0	0	0	0	0	0	0	0	0	0	inf	0	0	0	0	0	0
S:1439	0	0	0	0	0	0	0	0	0	0	0	0	0	inf	0	0	0	0	0	0
S:1440	0	0	0	0	0	0	1.23597	0	0	0	0	0	0	2.15116	0	0	0	0	0	0
S:1441	0	0	0	0	3.72125	0	0	0	0	0	0	0	0	2.15116	0	0	0	0	0	0
S:1442	0	0	0	0	0	0	0	0	0	0	0	3.26101	0	2.15116	0	0	0	0	0	0
S:1443	0	0	0	0	0	0	inf	0	0	0	0	0	0	0	0	0	0	0	0	0
S:1444	111.917	0	0	0	3.72125	35.6216	inf	0	0	0	inf	inf	0	0	0	17.3108	0	337.75	0	inf
S:1445	0	0	0	0	0	0	inf	0	0	0	0	0	0	0	0	0	0	0	0	0
S:1446	0	0	0	0	3.72125	35.6216	inf	0	0	0	3.8917	3.26101	0	0	0	0	0	0	0	5.39151
S:1447	0	0	0	0	3.72125	0	1.23597	0	0	0	3.8917	3.26101	0	2.15116	0	0	0	0	0	5.39151
S:1448	0	0	0	0	0	0	1.23597	0	0	0	0	0	0	2.15116	0	0	0	0	0	0
S:1449	0	20.6562	0	0	7.46853	0	0	0	0	0	1.94404	1.62893	0	0	0	0	0	0	0	2.6934
S:1450	0	20.6562	0	0	0	0	0	84.125	0	44.6333	1.94404	1.62893	0	1.07442	0	0	0	0	0	0
S:1451	0	0	0	0	0	0	2.47603	0	0	0	1.94404	1.62893	0	1.07442	0	0	0	0	0	2.6934
S:1452	0	0	0	0	0	0	0.617162	0	23.6786	0	1.94404	1.62893	0	1.07442	0	0	0	0	0	2.6934
S:1453	55.9167	0	0	0	7.46853	17.7973	0	0	0	0	1.94404	1.62893	0	1.07442	0	0	0	0	0	2.6934
S:1454	0	0	0	0	1.85889	0	2.47603	0	0	0	0	0	0	1.07442	0	0	0	0	0	0
S:1455	0	0	0	0	1.85889	0	0	0	0	0	0	6.54259	0	0	0	8.64865	0	0	0	2.6934
S:1456	55.9167	0	0	0	inf	0	0	0	0	0	0	1.62893	0	0	0	8.64865	0	0	0	2.6934
S:1457	0	0	0	39.3235	7.46853	0	2.47603	0	0	0	7.81159	6.54259	31.7381	0	0	35.0959	0	0	74.7222	10.8341
S:1458	0	0	0	0	0	0	inf	0	0	0	0	0	0	0	0	0	0	0	0	0
S:1459	0	0	0	0	0	0	2.47603	0	0	0	1.94404	0	0	0	0	0	0	0	0	0
S:1460	0	0	0	0	0	0	0	0	0	0	0	0	0	inf	0	0	0	0	0	0
S:1461	0	0	0	0	0	0	inf	0	0	0	1.94404	0	0	0	0	0	0	0	0	0
S:1462	0	0	0	0	1.85889	0	0	0	0	0	0	0	0	4.31235	0	0	0	0	0	0
S:1463	0	0	0	0	0	0	0.617162	0	0	0	0	0	0	4.31235	0	0	0	0	0	0
S:1464	0	0	0	0	0	0	2.47603	0	0	0	1.94404	0	0	1.07442	0	0	0	0	0	0
S:1465	0	0	0	0	0	17.7973	0.617162	0	23.6786	0	0	6.54259	0	0	0	0	0	0	0	10.8341
S:1466	0	0	0	0	0	0	0.617162	0	0	0	7.81159	1.62893	0	0	0	0	0	0	0	0
S:1467	0	0	0	0	1.85889	0	0.617162	0	0	0	1.94404	1.62893	0	4.31235	0	0	0	0	0	2.6934
S:1468	0	0	0	0	0	0	0	0	0	0	0	1.62893	0	4.31235	0	0	0	0	0	0
S:1469	0	0	0	0	0	0	0.617162	0	0	0	0	0	0	4.31235	0	0	0	0	0	0
S:1470	0	0	0	0	0	0	0.617162	0	0	0	1.94404	1.62893	0	4.31235	0	0	0	0	0	2.6934
S:1471	0	0	0	0	0	0	inf	0	0	0	0	0	0	4.31235	0	0	0	0	0	0
S:1472	0	0	0	0	0	0	0.617162	0	0	0	1.94404	1.62893	0	1.07442	0	0	0	0	0	2.6934
S:1473	0	0	0	0	1.85889	0	2.47603	0	0	0	0	0	0	1.07442	0	0	0	0	0	0
S:1474	0	0	0	0	0	0	inf	0	0	0	0	0	0	1.07442	0	0	0	0	0	0
S:1475	0	0	0	39.3235	0	0	0	84.125	0	44.6333	1.94404	1.62893	31.7381	1.07442	0	8.64865	0	0	0	0
S:1476	0	0	0	0	1.85889	0	0.617162	0	0	0	0	1.62893	0	1.07442	0	0	0	0	0	0
S:1477	0	0	0	0	1.85889	0	0	0	0	0	0	1.62893	0	4.31235	0	0	0	0	0	0
S:1478	0	0	0	0	0	0	0	0	0	0	0	1.62893	0	4.31235	0	0	0	0	0	0
S:1479	0	0	0	39.3235	0	0	0.617162	0	0	0	0	0	31.7381	1.07442	0	0	0	0	0	0
S:1480	0	0	0	0	inf	0	inf	0	23.6786	191.429	1.94404	inf	0	0	0	0	0	0	0	0
S:1481	0	0	0	0	1.85889	0	2.47603	0	0	0	1.94404	6.54259	0	1.07442	0	0	0	0	0	10.8341
S:1482	0	0	0	0	0	0	2.47603	0	0	0	0	0	0	0	0	0	0	0	0	2.6934
S:1483	0	0	0	0	1.85889	0	0.617162	0	0	0	0	0	0	1.07442	0	0	0	0	0	0
S:1484	0	0	0	0	0	0	0	0	0	0	0	1.62893	0	4.31235	0	0	0	0	0	0
S:1485	0	0	0	0	0	0	0	0	0	0	0	0	0	inf	0	0	0	0	0	0
S:1486	55.9167	0	0	0	1.85889	0	2.47603	0	0	0	1.94404	6.54259	0	0	0	0	0	0	0	10.8341
S:1487	0	0	0	0	1.85889	0	2.47603	0	0	0	0	6.54259	0	0	0	0	0	0	0	0
S:1488	0	0	0	0	0	17.7973	2.47603	0	0	0	0	0	0	1.07442	0	0	0	0	0	2.6934
S:1489	0	0	0	0	0	0	0.617162	0	0	0	0	0	0	4.31235	0	0	0	0	0	0
S:1490	0	0	0	0	0	0	0.617162	0	0	0	0	1.62893	0	1.07442	0	0	0	0	0	0
S:1491	0	0	0	0	0	0	0	0	0	0	1.94404	1.62893	0	4.31235	0	0	0	0	0	0
S:1492	0	0	0	0	1.85889	0	2.47603	0	0	0	0	0	0	1.07442	0	0	0	0	0	0
S:1493	0	0	0	0	1.85889	0	inf	0	0	0	1.94404	1.62893	0	0	0	0	0	0	0	0
S:1494	0	0	0	0	1.85889	0	0.617162	0	23.6786	0	1.94404	1.62893	0	1.07442	0	0	0	0	0	2.6934
S:1495	0	0	0	0	1.85889	0	0.617162	0	0	0	0	0	0	1.07442	0	0	0	0	0	0
S:1496	0	0	0	0	1.85889	17.7973	0	0	0	0	1.94404	6.54259	0	0	0	0	0	0	0	10.8341
S:1497	0	0	0	0	1.85889	0	2.47603	0	0	0	0	0	0	1.07442	0	0	0	0	0	0
S:1498	0	0	0	0	1.85889	0	inf	0	0	0	1.94404	1.62893	0	0	0	0	0	0	0	2.6934
S:1499	0	0	0	0	0	0	0	0	98.2963	0	0	0	0	1.07442	0	0	0	0	0	0
S:1500	0	0	0	0	3.73077	0	inf	0	15.7738	29.7333	1.29483	3.26814	0	0	0	0	0	0	0	0
S:1501	37.25	0	0	0	1.2381	11.8559	inf	0	0	0	1.29483	3.26814	0	0	0	5.76126	0	112.417	0	5.41232
S:1502	0	0	0	0	1.2381	0	1.23636	0	0	0	0	1.08491	0	2.15385	0	0	0	0	0	5.41232
S:1503	0	0	0	0	1.2381	0	3.7202	0	0	0	1.29483	1.08491	0	0.715504	0	0	0	0	0	1.79403
S:1504	0	0	0	0	3.73077	11.8559	0.410891	0	49.1111	29.7333	1.29483	1.08491	0	2.15385	450.667	53.375	0	0	0	1.79403
S:1505	0	0	0	0	3.73077	0	inf	0	0	0	3.90217	3.26814	0	0	0	0	0	0	0	1.79403
S:1506	0	0	0	0	1.2381	0	inf	0	0	0	0	1.08491	0	6.48364	0	0	0	0	0	0
S:1507	0	0	0	0	1.2381	0	0	0	0	0	0	1.08491	0	2.15385	0	0	0	0	0	0
S:1508	0	0	0	0	11.2421	0	3.7202	0	0	0	1.29483	1.08491	0	2.15385	0	0	0	0	0	0
S:1509	0	13.7604	0	0	1.2381	0	1.23636	0	0	0	0	1.08491	0	0	0	0	0	0	0	1.79403
S:1510	0	0	0	0	0	0	0	0	0	0	0	0	0	inf	0	0	0	0	0	0
S:1511	0	0	0	0	0	0	0	0	0	0	0	0	0	inf	0	0	0	0	0	0
S:1512	0	0	0	0	1.2381	0	1.23636	0	0	0	3.90217	3.26814	0	0.715504	0	0	0	0	0	1.79403
S:1513	0	0	0	0	0	0	0	0	0	0	0	0	0	inf	0	0	0	0	0	0
S:1514	0	0	0	0	1.2381	11.8559	1.23636	0	0	0	3.90217	3.26814	0	0.715504	0	5.76126	0	0	0	1.79403
S:1515	0	0	0	26.1961	1.2381	0	0.410891	56.0417	0	0	1.29483	1.08491	21.1429	0.715504	0	0	450.667	0	0	1.79403
S:1516	0	0	0	0	1.2381	0	0.410891	0	0	0	0	0	0	6.48364	0	0	0	0	0	0
S:1517	0	0	0	0	0	0	3.7202	0	0	0	0	1.08491	0	0	0	0	0	0	0	1.79403
S:1518	0	0	0	0	0	0	0	0	0	0	0	0	0	inf	0	0	0	0	0	0
S:1519	0	0	0	0	0	0	0.410891	0	0	0	1.29483	1.08491	0	2.15385	0	0	0	0	0	0
S:1520	27.9167	10.3125	0	0	5.61579	24.3704	0.82314	0	32.716	22.2833	0.970217	2.17666	0	1.43434	337.75	72.169	0	84.25	0	3.60506
S:1521	0	10.3125	0	0	2.48485	0	1.85762	42	0	22.2833	0.970217	2.17666	0	0.536047	0	4.31757	0	0	37.3056	1.34434
S:1522	0	10.3125	0	0	2.48485	0	0	0	0	0	0.970217	0.812893	0	1.43434	0	0	0	0	0	1.34434
S:1523	0	0	0	0	0.9277	0	1.85762	0	0	0	0.970217	0.812893	0	1.43434	0	0	0	0	0	1.34434
S:1524	0	0	0	0	2.48485	0	1.85762	0	0	0	0	0	0	1.43434	0	0	0	0	0	0
S:1525	0	0	0	0	2.48485	8.88514	1.85762	0	0	0	0.970217	2.17666	0	1.43434	0	0	0	0	0	0
S:1526	0	0	0	0	5.61579	0	4.96849	0	0	0	0.970217	0	0	0	0	0	0	0	0	0
S:1527	0	0	0	0	0	0	0.82314	0	0	0	0	2.17666	0	0.536047	0	0	0	0	0	1.34434
S:1528	27.9167	0	0	0	2.48485	0	4.96849	0	0	0	0.970217	2.17666	0	0	0	4.31757	0	0	0	1.34434
S:1529	0	0	0	0	0	0	0.307756	0	0	0	0	0	0	8.66511	0	0	0	0	0	0
S:1530	0	10.3125	0	0	0	0	0.82314	0	0	0	0	0.812893	0	0.536047	0	0	0	0	0	1.34434
S:1531	0	0	0	0	0.9277	0	0.307756	0	0	0	2.59903	0.812893	0	0.536047	0	11.6804	0	0	37.3056	0
S:1532	0	0	0	0	0	0	1.85762	0	0	0	0	0	0	1.43434	0	0	0	0	0	0
S:1533	0	0	0	0	0	0	0.82314	0	0	0	0	0	0	3.23832	0	0	0	0	0	0
S:1534	0	0	0	0	0	0	1.85762	0	0	0	0.970217	0.812893	0	1.43434	0	0	0	0	0	1.34434
S:1535	0	0	0	19.6324	0	0	0.307756	0	0	0	0.970217	0	0	1.43434	0	0	0	0	37.3056	0
S:1536	0	0	0	0	0	0	0.307756	0	0	0	0.970217	0.812893	0	1.43434	0	4.31757	0	0	0	0
S:1537	0	0	0	0	0	0	0.82314	0	0	0	2.59903	2.17666	0	3.23832	0	0	0	0	0	0
S:1538	0	0	0	0	0.9277	0	0.82314	0	0	0	0.970217	2.17666	0	3.23832	0	0	0	0	0	1.34434
S:1539	0	0	0	0	0	0	1.85762	0	0	0	2.59903	2.17666	0	0.536047	0	0	0	0	0	1.34434
S:1540	0	0	0	0	0.9277	0	0	0	0	0	0	0	44.4	3.23832	0	0	0	0	0	0
S:1541	0	0	0	0	0	0	0	0	0	0	1.94746	1.63091	0	2.15654	0	0	0	0	0	1.07453
S:1542	0	0	0	0	0	0	0	0	0	0	0	0	0	inf	0	0	0	0	0	0
S:1543	0	0	0	0	3.74035	18.2639	6.22093	0	9.45	47.75	19.7436	6.57778	0	0	270	8.75342	0	0	0	10.9282
S:1544	0	0	0	0	1.86189	0	1.23675	0	0	0	0.775451	0.649686	0	0.428372	0	0	0	0	0	1.07453
S:1545	22.3167	0	0	0	0.741463	0	2.48093	0	0	0	0.775451	1.63091	0	0.428372	0	0	0	0	0	2.70142
S:1546	0	8.24375	0	0	1.86189	0	0.616529	0	0	0	1.94746	1.63091	0	0.428372	0	3.45135	0	0	0	1.07453
S:1547	0	0	0	0	1.86189	7.1027	1.23675	0	9.45	17.8133	1.94746	1.63091	0	2.15654	0	3.45135	0	0	0	2.70142
S:1548	0	6.86458	0	0	1.48811	0	0.926325	27.9583	0	14.8333	1.55652	2.45411	0	0.858741	0	2.87387	0	0	24.8333	0.894654
S:1549	0	0	0	0	0.617305	0	0.926325	0	19.6	0	0.645608	0.540881	0	0.356589	0	0	0	0	0	0.894654
S:1550	0	0	0	0	0.617305	5.91441	0.926325	0	0	0	0	0.540881	10.5476	0.858741	0	13.3125	0	0	0	0
S:1551	0	0	0	0	0.617305	0	1.65174	0	0	0	1.55652	1.30347	0	0.858741	0	0	0	0	0	4.07143
S:1552	0	0	0	0	2.80263	5.91441	0.20462	0	0	14.8333	0.645608	4.38095	0	0.858741	0	2.87387	0	0	0	4.07143
S:1553	0	0	0	0	0.617305	0	0.20462	0	0	0	0.645608	0.540881	26.6	1.61565	0	2.87387	0	0	0	0.894654
S:1554	0	0	0	0	0.617305	0	0.926325	0	0	0	0.645608	1.30347	0	2.88212	0	0	0	0	0	0.894654
S:1555	0	6.86458	0	0	0.617305	0	0.20462	0	0	0	0	0.540881	0	1.61565	0	0	0	0	0	2.15924
S:1556	0	0	0	0	2.80263	0	0.926325	0	0	0	2.93182	0.540881	0	0	0	0	0	0	0	0.894654
S:1557	0	6.86458	0	0	0	0	0.926325	0	0	0	2.93182	1.30347	0	0.356589	0	0	0	0	0	0.894654
S:1558	0	0	0	0	0	0	1.65174	0	0	0	0.645608	1.30347	0	0.858741	0	0	0	0	0	2.15924
S:1559	18.5833	0	0	0	1.48811	0	0.926325	0	0	0	1.55652	1.30347	0	0.356589	0	0	0	0	0	0.894654
S:1560	0	0	0	0	0	0	0.175153	0	0	0	1.29589	0.463163	0	6.52235	0	0	0	0	0	0.766173
S:1561	0	0	0	0	3.75	5.06564	2.06811	0	6.7398	0	6.56899	3.28254	9.03401	0	0	2.46139	0	0	0	5.45455
S:1562	0	0	0	0	0	0	0.175153	0	6.7398	0	0	0.463163	0	3.61111	0	0	0	0	0	0.766173
S:1563	0	0	0	53.36	2.24	0	1.23715	0	0	0	2.34327	3.28254	0	0	0	5.82648	0	0	21.2698	0.766173
S:1564	0	0	0	0	3.75	0	inf	0	16.321	31.7857	1.29589	3.28254	0	0.305316	0	0	0	0	0	0
S:1565	0	5.87946	0	0	2.24	0	0.740066	0	0	0	2.34327	1.96139	0	0.714841	0	2.46139	0	0	0	0.766173
S:1566	0	0	0	0	1.23893	5.06564	2.06811	0	0	0	1.29589	1.08517	0	1.29112	0	0	0	0	0	0.766173
S:1567	0	0	0	0	1.23893	0	0.409917	0	6.7398	0	1.29589	1.08517	0	3.61111	0	0	0	0	0	1.79779
S:1568	0	0	0	0	0.528621	5.06564	0.409917	23.9464	6.7398	0	2.34327	1.08517	0	0.305316	0	2.46139	0	0	0	0.766173
S:1569	0	0	0	0	0	0	0.615894	0	0	0	1.95091	0.929247	7.89881	1.72553	0	0	0	0	0	1.53961
S:1570	0	0	0	0	1.86491	4.42905	10.0033	0	0	0	3.13577	2.62349	0	0	0	0	0	0	0	6.85096
S:1571	0	5.14062	0	9.78676	7.56028	4.42905	0.615894	0	5.89286	11.1083	0.483303	1.63291	7.89881	0.26686	0	14.3887	0	42	0	0.669811
S:1572	0	0	0	23.7857	1.06094	0	2.48586	0	0	0	1.10973	0.929247	18.9714	0.26686	0	8.86111	0	0	18.5972	1.53961
S:1573	0	0	0	0	0.410376	0	0.306612	0	5.23413	0	0	0.359539	0	2.16197	0	0	0	0	0	0.594864
S:1574	0	0	0	0	0.927448	3.93393	1.8619	0	0	0	0.970109	1.39828	0	0.920227	0	0	0	0	0	1.34597
S:1575	0	0	0	0	0.410376	3.93393	0.306612	18.5972	5.23413	0	1.67065	0.812303	0	0.920227	0	1.91141	0	0	0	0.594864
S:1576	0	0	0	0	2.49531	0	1.8619	0	0	0	1.67065	2.18413	0	0.236951	0	0	0	0	0	2.32041
S:1577	0	9.42652	0	0	1.39605	3.53784	0.704099	16.725	0	21.1429	0.861514	1.22231	0	1.22984	0	10.2616	0	33.55	0	1.19537
S:1578	11.1167	0	0	0	0.823621	0	2.17583	0	0	0	0.385921	0	0	0.213023	0	1.71892	0	0	0	0
S:1579	0	0	0	0	0.823621	0	2.17583	0	0	0	3.27534	3.96038	0	0.213023	0	0	0	0	0	4.55929
S:1580	0	0	0	0	1.39605	0	0.460679	0	0	0	0.861514	0.32327	0	1.79969	0	1.71892	0	0	0	1.19537
S:1581	0	0	0	0	0.335128	0	0.615257	0	0	0	1.29697	1.08544	0	1.54091	0	1.56143	0	0	0	0.485849
S:1582	0	0	0	0	0.740559	0	0.615257	0	0	0	0.350509	0.293596	13.25	1.54091	0	1.56143	0	0	0	1.07488
S:1583	0	0	0	0	1.65884	0	1.05966	0	0	0	1.7356	0.975949	0	0.387794	0	1.43018	0	0	0	2.41361
S:1584	9.25	3.41667	0	0	2.3432	0	0.101485	13.9167	0	7.38333	0.703557	2.05016	0	0.642056	0	3.16563	0	0	0	1.62
S:1585	0	0	0	15.0909	0.6726	0	4.17085	0	0	0	0.703557	0.589045	12.0364	0.177132	0	5.3	0	0	12.3611	0.976303
S:1586	0	0	0	0	2.3432	2.94369	0.770349	0	0	0	0.703557	0.975949	5.25	0.642056	0	7.9687	0	27.9167	0	1.62
S:1587	0	0	0	0	1.49155	0	0.683832	0	3.61264	0	1.05917	0.539432	0	1.19588	0	1.31913	0	0	0	0.894155
S:1588	0	0	0	0	0.927193	2.51931	1.4176	0	0	0	0.594203	0.811709	0	0.533879	0	0	0	0	0	1.97129
S:1589	0	6.5062	0	0	0.568047	2.51931	1.4176	0	0	0	0.97	0.230009	0	0.151495	0	0	0	0	0	0.380728
S:1590	7.91667	2.92411	0	0	1.35467	2.51931	1.08208	0	0	0	0.594203	0.811709	0	0.533879	0	0	0	0	0	1.34762
S:1591	0	0	0	0	0.526973	0	5.44949	0	0	0	1.29805	1.48668	0	1.29318	0	0	0	0	0	2.47596
S:1592	0	2.72708	0	0	2.25319	2.34955	0.557989	0	0	0	0.894545	0.748539	4.19048	1.29318	0	2.48141	0	0	9.86667	1.24286
S:1593	0	0	0	0	0.793233	0	1.09961	0	0	0	0.82987	0.430284	0	0.893975	0	0	0	0	0	0.713428
S:1594	0	0	0	0	0.793233	0	0.376068	0	0	0	1.62851	1.00122	0	1.92698	0	0	0	0	0	0.713428
S:1595	0	0	0	0	0.793233	0	4.08165	0	0	0	1.19708	1.78972	0	1.17433	0	0	0	0	0	2.26763
S:1596	0	0	0	10.3359	1.06137	0	1.23913	0	0	0	2.50788	2.64437	0	0.265152	0	2.16781	0	0	8.69281	2.09135
S:1597	0	0	0	0	0.525313	0	0.737458	0	0	0	0.54961	0.291368	0	1.29526	0	1.56912	0	0	0	0.483412
S:1598	0	1.69271	0	0	2.52758	3.13043	0.575862	0	4.2029	3.65833	1.52255	0.81051	5.70435	0.832809	0	2.38636	0	0	6.125	1.35096
S:1599	18.0273	3.64937	0	0	1.45453	0	1.14337	0	0	0	1.85098	2.20712	0	0.183034	0	1.4997	0	0	0	1.71625
S:1600	0	1.69271	0	0	0.926678	0	0.474444	0	0	0	0.735488	0.614966	0	1.4426	0	0.708333	0	0	0	1.71625
S:1601	9.21678	0	0	0	2.10032	0	1.66497	0	0	0	1.30135	2.49674	0	0.352069	0	0.628128	0	0	0	2.19317
S:1602	0	0	0	15.6548	1.24318	2.76282	0.92521	0	0	0	0.641727	1.08654	2.30688	0.711478	0	4.98024	0	12.2685	12.7019	0.639429
S:1603	0	0	0	0	0.613263	1.29329	0.487479	0	0	0	0.641727	0.536508	2.30688	1.62888	0	0.628128	0	0	0	1.17161
S:1604	3.91667	4.99231	0	2.7542	0.967623	0	1.77203	0	0	0	0.615474	1.24575	0	1.32116	0	0.605212	0	0	0	0.856651
S:1605	13.6034	2.7828	0	0	1.24405	0	1.24196	0	0	0	1.53612	1.72959	0	0.300435	0	1.14338	0	0	0	1.24638
S:1606	0	4.46552	0	0	0.853519	0	1.6066	5.31048	3.20494	0	0.893382	0.746129	0	0.710796	0	0.545336	42.7097	0	0	0.549261
S:1607	0	0	0	0	0.656865	0	0.798822	0	0	0	0.859477	0.873274	0	1.23423	0	1.73889	0	0	0	0.958104
S:1608	3.21078	5.75306	0	2.25779	0.926157	0	1.48236	4.83088	0	0	0.969557	1.50893	0	1.12442	0	0.496025	0	0	4.29085	1.11444
S:1609	2.58333	4.54465	0	1.81653	0.981973	0	1.30549	3.8869	0	0	1.34796	1.59706	0	1.15642	0	0.39897	0	0	3.45238	1.44031
S:1610	0	0.909091	0	0	1.36495	0	0.608108	0	0	0	1.11301	0.808065	0	1.45117	0	0.789423	0	0	0	1.56087
S:1611	2.25	1.75292	0	0	1.50949	1.50355	1.00703	0	2.01891	1.79583	1.58182	1.18246	2.74043	0.768873	0	1.11957	0	0	3.00694	1.7862
S:1612	4.26116	0.707589	0	0	0.594752	1.27677	1.29375	0	0.811224	3.34026	0.622827	1.06214	1.08759	0.991246	0	0.295849	0	0	0	0.743495
S:1613	0	0	0	0	0.943601	1.12634	0.959125	0	0.71712	0	0.890977	1.08911	0.961451	1.50019	0	0.834016	0	0	0	0.648016
S:1614	0	0.615234	0	0	0.663179	0.529983	0.872232	0	0	0	0.873315	0.888332	0.945685	1.56175	0	0.819892	0	0	0	1.365
S:1615	1.53986	0	0	0	0.839298	0	0.718041	0	1.37255	0	0.164776	0.404937	0	1.76263	0	0.237564	0	0	0	0.3126
S:1616	0	0.449855	0	0	0.576232	0.387492	0.740999	0	0.515781	0	0.867004	0.9694	0.691584	1.48553	0	1.28932	0	0	0	1.12795
S:1617	1.07133	1.31821	0	0.733333	1.07961	0.889362	1.35981	0.734694	1.90574	1.36439	1.17786	1.19943	2.81228	0.807612	0	0.79352	5.91327	0	1.47692	1.09553
S:1618	2.24	0.900631	0	1.39535	1.06433	0.71582	1.06219	0.69292	0.845901	0.31695	1.38297	1.52829	2.03003	0.901413	0	1.09706	1.38977	0.925795	2.0952	1.42999
S:1619	0.248056	0.710111	inf	inf	0.44564	0.827914	1.13958	inf	1.30181	0.690328	0.928369	1.01022	inf	1.00458	0.0455247	0.627547	inf	inf	inf	0.733577
S:1620

## Sheet: gene_count
	piperacillin-tazobactam	chloramphenicol	tobramycin	tetracycline	ceftazidime	amoxicillin-clavunate	ciprofloxacin	trimethoprim	ampicillin	ceftriaxone	gentamicin	cefotaxime	streptomycin	meropenem	imipenem	amoxicillin	trimethoprim-sulfamethoxazole	amoxicillin-clavulanate	azithromycin	cefuroxime
S:1357	0	0	0	0	0	0	1	0	0	0	0	0	0	1	0	0	0	0	0	0
S:1358	0	0	0	0	1	0	2	0	0	0	0	0	0	0	0	0	0	0	0	0
S:1359	0	0	0	0	0	0	0	0	0	0	0	0	0	2	0	0	0	0	0	0
S:1360	0	0	0	0	1	0	1	0	0	0	0	1	0	1	0	0	0	0	0	0
S:1361	0	0	0	0	1	0	2	0	0	0	1	1	0	0	0	0	0	0	0	1
S:1362	0	0	0	0	0	0	1	0	0	0	0	0	0	1	0	0	0	0	0	0
S:1363	0	0	0	0	1	0	1	0	0	0	1	0	0	0	0	0	0	0	0	0
S:1364	0	0	0	0	0	0	0	0	0	0	0	0	0	2	0	0	0	0	0	0
S:1365	0	0	0	0	1	0	1	0	0	0	0	0	0	0	0	0	0	0	0	0
S:1366	0	0	0	0	0	0	1	0	0	0	0	0	0	2	0	0	0	0	0	0
S:1367	0	0	0	0	0	0	2	0	0	0	0	0	0	0	0	0	0	0	0	0
S:1368	0	0	0	0	1	0	2	0	0	0	0	0	0	0	0	0	0	0	0	0
S:1369	0	0	0	0	1	0	2	0	0	0	0	0	0	0	0	0	0	0	0	0
S:1370	0	0	0	0	0	1	0	0	0	0	0	0	0	1	0	0	0	0	0	0
S:1371	0	0	0	0	0	0	2	0	0	0	1	0	0	0	0	0	0	0	0	0
S:1372	0	0	0	0	0	0	0	0	0	0	0	0	0	2	0	0	0	0	0	0
S:1373	0	0	0	0	1	0	2	0	0	0	0	0	0	0	0	0	0	0	0	0
S:1374	0	0	0	0	0	0	1	0	0	0	0	0	0	1	0	0	0	0	0	0
S:1375	0	0	0	0	1	1	1	0	0	0	0	1	0	0	0	0	0	0	0	1
S:1376	0	0	0	0	1	0	1	0	0	0	0	1	0	1	0	0	0	0	0	0
S:1377	0	0	0	0	2	0	1	0	0	0	0	0	0	0	0	0	0	0	0	0
S:1378	0	0	0	0	0	0	1	0	0	0	0	0	0	1	0	0	0	0	0	0
S:1379	0	0	0	0	1	1	2	0	0	0	1	1	0	0	0	0	0	0	0	2
S:1380	0	0	0	0	0	0	2	0	0	0	0	0	0	1	0	0	0	0	0	0
S:1381	0	0	0	0	1	0	2	0	0	0	1	1	0	0	0	0	0	0	0	0
S:1382	0	0	0	0	0	1	1	0	0	0	0	0	0	1	0	1	0	0	0	1
S:1383	0	0	0	1	0	0	0	0	0	0	0	1	0	0	0	0	0	0	0	1
S:1384	0	0	0	0	0	0	0	0	0	0	0	0	0	2	0	0	0	0	0	0
S:1385	0	0	0	0	0	0	0	0	0	0	0	0	0	2	0	0	0	0	0	0
S:1386	0	0	0	0	1	0	1	0	0	0	1	1	0	1	0	0	0	0	0	0
S:1387	0	0	0	0	0	0	0	0	1	0	0	0	0	1	0	0	0	0	0	0
S:1388	0	0	0	0	0	0	1	0	0	0	1	0	0	1	0	0	0	0	0	0
S:1389	0	0	0	0	0	0	0	0	0	0	0	0	0	2	0	0	0	0	0	0
S:1390	0	0	0	0	1	0	1	0	0	0	2	2	0	0	0	0	0	0	0	0
S:1391	0	0	0	0	0	0	0	0	0	0	0	1	0	1	0	0	0	0	0	1
S:1392	0	1	0	0	0	0	1	0	0	0	0	0	0	0	0	0	0	0	0	1
S:1393	0	0	0	0	0	0	1	0	0	0	1	1	0	0	0	0	0	0	0	0
S:1394	0	0	0	0	0	0	1	0	0	0	1	1	0	1	0	0	0	0	0	1
S:1395	0	0	0	0	1	0	2	0	0	0	1	0	0	0	0	0	0	0	0	1
S:1396	0	0	0	0	0	0	0	0	1	0	0	0	0	1	0	0	0	0	0	0
S:1397	0	0	0	0	0	0	0	0	1	0	0	0	0	1	0	0	0	0	0	0
S:1398	0	0	0	0	0	0	2	0	0	0	1	1	0	0	0	0	0	0	0	1
S:1399	0	0	0	0	1	0	2	0	0	0	1	1	0	0	0	0	0	0	0	0
S:1400	0	0	0	0	1	0	0	0	0	0	0	0	0	2	0	0	0	0	0	0
S:1401	0	0	0	0	1	0	0	0	0	0	1	0	0	1	0	0	0	0	0	0
S:1402	0	0	0	0	0	0	0	0	0	0	0	0	0	2	0	0	0	0	0	0
S:1403	0	0	0	0	0	0	2	0	0	0	2	1	0	0	0	0	0	0	0	1
S:1404	0	0	0	0	1	0	1	0	0	0	1	1	0	1	0	0	0	0	0	0
S:1405	0	0	0	0	0	0	0	0	0	0	0	0	0	1	0	0	0	0	0	1
S:1406	0	0	0	0	0	0	0	0	0	0	0	0	0	2	0	0	0	0	0	0
S:1407	0	0	0	0	1	0	2	0	0	0	0	1	0	0	0	0	0	0	0	0
S:1408	0	0	0	0	1	0	1	0	0	0	1	1	0	1	0	0	0	0	0	1
S:1409	0	1	0	0	1	0	0	0	0	0	1	1	0	0	0	1	0	0	0	1
S:1410	0	0	0	0	0	0	2	0	0	0	0	0	0	0	0	0	0	0	0	0
S:1411	0	0	0	0	0	0	1	0	0	0	1	0	0	1	0	0	0	0	0	0
S:1412	0	0	0	0	0	0	1	0	0	0	0	0	0	1	0	0	0	0	0	0
S:1413	0	0	0	0	0	0	0	0	0	0	0	0	0	2	0	0	0	0	0	0
S:1414	0	0	0	0	0	0	0	0	2	0	0	0	0	0	0	0	0	0	0	0
S:1415	0	0	0	0	0	0	0	0	0	0	0	0	0	2	0	0	0	0	0	0
S:1416	0	0	0	1	0	0	1	0	0	0	0	0	1	0	0	1	0	0	0	0
S:1417	0	0	0	0	0	0	0	0	0	0	0	1	0	1	0	0	0	0	0	1
S:1418	0	0	0	0	0	0	0	0	0	0	0	0	0	2	0	0	0	0	0	0
S:1419	0	0	0	0	0	0	1	0	0	0	0	0	0	1	0	0	0	0	0	0
S:1420	0	0	0	0	0	0	2	0	0	0	0	0	0	1	0	0	0	0	0	1
S:1421	0	0	0	0	0	0	1	0	0	0	0	0	0	1	0	0	0	0	0	0
S:1422	0	0	0	1	0	0	0	0	1	0	0	0	1	0	0	0	0	0	0	0
S:1423	0	0	0	0	0	0	0	0	0	0	0	0	0	2	0	0	0	0	0	0
S:1424	0	0	0	0	0	0	1	0	0	0	1	2	0	0	0	0	0	0	0	2
S:1425	0	0	0	0	0	0	1	0	0	0	0	0	0	1	0	0	0	0	0	0
S:1426	0	0	0	0	0	0	0	0	0	0	0	0	0	2	0	0	0	0	0	0
S:1427	0	0	0	0	0	0	1	0	0	0	0	0	0	1	0	0	0	0	0	0
S:1428	0	0	0	0	0	0	1	0	0	0	2	1	0	0	0	0	0	0	0	0
S:1429	0	0	0	0	0	0	1	0	0	0	1	1	0	1	0	0	0	0	0	1
S:1430	0	0	0	0	0	0	2	0	0	0	0	0	0	0	0	0	0	0	0	0
S:1431	0	0	0	0	0	0	0	0	1	0	0	0	0	1	0	0	0	0	0	0
S:1432	0	0	0	1	1	0	1	0	0	0	1	2	0	0	0	0	0	0	0	1
S:1433	0	0	0	0	1	0	1	0	0	0	1	1	0	1	0	0	0	0	0	1
S:1434	0	0	0	0	1	0	2	0	0	0	1	0	0	0	0	0	0	0	0	0
S:1435	0	0	0	0	0	0	0	0	0	0	0	1	0	1	0	0	0	0	0	1
S:1436	0	0	1	0	1	0	1	0	0	0	2	1	0	0	0	1	0	0	0	1
S:1437	0	0	0	0	0	0	1	0	0	0	0	1	0	0	0	0	0	0	0	0
S:1438	0	0	0	0	0	0	0	0	0	0	0	0	0	2	0	0	0	0	0	0
S:1439	0	0	0	0	0	0	0	0	0	0	0	0	0	2	0	0	0	0	0	0
S:1440	0	0	0	0	0	0	1	0	0	0	0	0	0	1	0	0	0	0	0	0
S:1441	0	0	0	0	1	0	0	0	0	0	0	0	0	1	0	0	0	0	0	0
S:1442	0	0	0	0	0	0	0	0	0	0	0	1	0	1	0	0	0	0	0	0
S:1443	0	0	0	0	0	0	2	0	0	0	0	0	0	0	0	0	0	0	0	0
S:1444	1	0	0	0	1	1	2	0	0	0	2	2	0	0	0	1	0	1	0	2
S:1445	0	0	0	0	0	0	2	0	0	0	0	0	0	0	0	0	0	0	0	0
S:1446	0	0	0	0	1	1	2	0	0	0	1	1	0	0	0	0	0	0	0	1
S:1447	0	0	0	0	1	0	1	0	0	0	1	1	0	1	0	0	0	0	0	1
S:1448	0	0	0	0	0	0	1	0	0	0	0	0	0	1	0	0	0	0	0	0
S:1449	0	1	0	0	2	0	0	0	0	0	1	1	0	0	0	0	0	0	0	1
S:1450	0	1	0	0	0	0	0	1	0	1	1	1	0	1	0	0	0	0	0	0
S:1451	0	0	0	0	0	0	2	0	0	0	1	1	0	1	0	0	0	0	0	1
S:1452	0	0	0	0	0	0	1	0	1	0	1	1	0	1	0	0	0	0	0	1
S:1453	1	0	0	0	2	1	0	0	0	0	1	1	0	1	0	0	0	0	0	1
S:1454	0	0	0	0	1	0	2	0	0	0	0	0	0	1	0	0	0	0	0	0
S:1455	0	0	0	0	1	0	0	0	0	0	0	2	0	0	0	1	0	0	0	1
S:1456	1	0	0	0	3	0	0	0	0	0	0	1	0	0	0	1	0	0	0	1
S:1457	0	0	0	1	2	0	2	0	0	0	2	2	1	0	0	2	0	0	1	2
S:1458	0	0	0	0	0	0	3	0	0	0	0	0	0	0	0	0	0	0	0	0
S:1459	0	0	0	0	0	0	2	0	0	0	1	0	0	0	0	0	0	0	0	0
S:1460	0	0	0	0	0	0	0	0	0	0	0	0	0	3	0	0	0	0	0	0
S:1461	0	0	0	0	0	0	3	0	0	0	1	0	0	0	0	0	0	0	0	0
S:1462	0	0	0	0	1	0	0	0	0	0	0	0	0	2	0	0	0	0	0	0
S:1463	0	0	0	0	0	0	1	0	0	0	0	0	0	2	0	0	0	0	0	0
S:1464	0	0	0	0	0	0	2	0	0	0	1	0	0	1	0	0	0	0	0	0
S:1465	0	0	0	0	0	1	1	0	1	0	0	2	0	0	0	0	0	0	0	2
S:1466	0	0	0	0	0	0	1	0	0	0	2	1	0	0	0	0	0	0	0	0
S:1467	0	0	0	0	1	0	1	0	0	0	1	1	0	2	0	0	0	0	0	1
S:1468	0	0	0	0	0	0	0	0	0	0	0	1	0	2	0	0	0	0	0	0
S:1469	0	0	0	0	0	0	1	0	0	0	0	0	0	2	0	0	0	0	0	0
S:1470	0	0	0	0	0	0	1	0	0	0	1	1	0	2	0	0	0	0	0	1
S:1471	0	0	0	0	0	0	3	0	0	0	0	0	0	2	0	0	0	0	0	0
S:1472	0	0	0	0	0	0	1	0	0	0	1	1	0	1	0	0	0	0	0	1
S:1473	0	0	0	0	1	0	2	0	0	0	0	0	0	1	0	0	0	0	0	0
S:1474	0	0	0	0	0	0	3	0	0	0	0	0	0	1	0	0	0	0	0	0
S:1475	0	0	0	1	0	0	0	1	0	1	1	1	1	1	0	1	0	0	0	0
S:1476	0	0	0	0	1	0	1	0	0	0	0	1	0	1	0	0	0	0	0	0
S:1477	0	0	0	0	1	0	0	0	0	0	0	1	0	2	0	0	0	0	0	0
S:1478	0	0	0	0	0	0	0	0	0	0	0	1	0	2	0	0	0	0	0	0
S:1479	0	0	0	1	0	0	1	0	0	0	0	0	1	1	0	0	0	0	0	0
S:1480	0	0	0	0	3	0	3	0	1	2	1	3	0	0	0	0	0	0	0	0
S:1481	0	0	0	0	1	0	2	0	0	0	1	2	0	1	0	0	0	0	0	2
S:1482	0	0	0	0	0	0	2	0	0	0	0	0	0	0	0	0	0	0	0	1
S:1483	0	0	0	0	1	0	1	0	0	0	0	0	0	1	0	0	0	0	0	0
S:1484	0	0	0	0	0	0	0	0	0	0	0	1	0	2	0	0	0	0	0	0
S:1485	0	0	0	0	0	0	0	0	0	0	0	0	0	3	0	0	0	0	0	0
S:1486	1	0	0	0	1	0	2	0	0	0	1	2	0	0	0	0	0	0	0	2
S:1487	0	0	0	0	1	0	2	0	0	0	0	2	0	0	0	0	0	0	0	0
S:1488	0	0	0	0	0	1	2	0	0	0	0	0	0	1	0	0	0	0	0	1
S:1489	0	0	0	0	0	0	1	0	0	0	0	0	0	2	0	0	0	0	0	0
S:1490	0	0	0	0	0	0	1	0	0	0	0	1	0	1	0	0	0	0	0	0
S:1491	0	0	0	0	0	0	0	0	0	0	1	1	0	2	0	0	0	0	0	0
S:1492	0	0	0	0	1	0	2	0	0	0	0	0	0	1	0	0	0	0	0	0
S:1493	0	0	0	0	1	0	3	0	0	0	1	1	0	0	0	0	0	0	0	0
S:1494	0	0	0	0	1	0	1	0	1	0	1	1	0	1	0	0	0	0	0	1
S:1495	0	0	0	0	1	0	1	0	0	0	0	0	0	1	0	0	0	0	0	0
S:1496	0	0	0	0	1	1	0	0	0	0	1	2	0	0	0	0	0	0	0	2
S:1497	0	0	0	0	1	0	2	0	0	0	0	0	0	1	0	0	0	0	0	0
S:1498	0	0	0	0	1	0	3	0	0	0	1	1	0	0	0	0	0	0	0	1
S:1499	0	0	0	0	0	0	0	0	2	0	0	0	0	1	0	0	0	0	0	0
S:1500	0	0	0	0	2	0	4	0	1	1	1	2	0	0	0	0	0	0	0	0
S:1501	1	0	0	0	1	1	4	0	0	0	1	2	0	0	0	1	0	1	0	2
S:1502	0	0	0	0	1	0	2	0	0	0	0	1	0	2	0	0	0	0	0	2
S:1503	0	0	0	0	1	0	3	0	0	0	1	1	0	1	0	0	0	0	0	1
S:1504	0	0	0	0	2	1	1	0	2	1	1	1	0	2	1	3	0	0	0	1
S:1505	0	0	0	0	2	0	4	0	0	0	2	2	0	0	0	0	0	0	0	1
S:1506	0	0	0	0	1	0	4	0	0	0	0	1	0	3	0	0	0	0	0	0
S:1507	0	0	0	0	1	0	0	0	0	0	0	1	0	2	0	0	0	0	0	0
S:1508	0	0	0	0	3	0	3	0	0	0	1	1	0	2	0	0	0	0	0	0
S:1509	0	1	0	0	1	0	2	0	0	0	0	1	0	0	0	0	0	0	0	1
S:1510	0	0	0	0	0	0	0	0	0	0	0	0	0	4	0	0	0	0	0	0
S:1511	0	0	0	0	0	0	0	0	0	0	0	0	0	4	0	0	0	0	0	0
S:1512	0	0	0	0	1	0	2	0	0	0	2	2	0	1	0	0	0	0	0	1
S:1513	0	0	0	0	0	0	0	0	0	0	0	0	0	4	0	0	0	0	0	0
S:1514	0	0	0	0	1	1	2	0	0	0	2	2	0	1	0	1	0	0	0	1
S:1515	0	0	0	1	1	0	1	1	0	0	1	1	1	1	0	0	1	0	0	1
S:1516	0	0	0	0	1	0	1	0	0	0	0	0	0	3	0	0	0	0	0	0
S:1517	0	0	0	0	0	0	3	0	0	0	0	1	0	0	0	0	0	0	0	1
S:1518	0	0	0	0	0	0	0	0	0	0	0	0	0	4	0	0	0	0	0	0
S:1519	0	0	0	0	0	0	1	0	0	0	1	1	0	2	0	0	0	0	0	0
S:1520	1	1	0	0	3	2	2	0	2	1	1	2	0	2	1	4	0	1	0	2
S:1521	0	1	0	0	2	0	3	1	0	1	1	2	0	1	0	1	0	0	1	1
S:1522	0	1	0	0	2	0	0	0	0	0	1	1	0	2	0	0	0	0	0	1
S:1523	0	0	0	0	1	0	3	0	0	0	1	1	0	2	0	0	0	0	0	1
S:1524	0	0	0	0	2	0	3	0	0	0	0	0	0	2	0	0	0	0	0	0
S:1525	0	0	0	0	2	1	3	0	0	0	1	2	0	2	0	0	0	0	0	0
S:1526	0	0	0	0	3	0	4	0	0	0	1	0	0	0	0	0	0	0	0	0
S:1527	0	0	0	0	0	0	2	0	0	0	0	2	0	1	0	0	0	0	0	1
S:1528	1	0	0	0	2	0	4	0	0	0	1	2	0	0	0	1	0	0	0	1
S:1529	0	0	0	0	0	0	1	0	0	0	0	0	0	4	0	0	0	0	0	0
S:1530	0	1	0	0	0	0	2	0	0	0	0	1	0	1	0	0	0	0	0	1
S:1531	0	0	0	0	1	0	1	0	0	0	2	1	0	1	0	2	0	0	1	0
S:1532	0	0	0	0	0	0	3	0	0	0	0	0	0	2	0	0	0	0	0	0
S:1533	0	0	0	0	0	0	2	0	0	0	0	0	0	3	0	0	0	0	0	0
S:1534	0	0	0	0	0	0	3	0	0	0	1	1	0	2	0	0	0	0	0	1
S:1535	0	0	0	1	0	0	1	0	0	0	1	0	0	2	0	0	0	0	1	0
S:1536	0	0	0	0	0	0	1	0	0	0	1	1	0	2	0	1	0	0	0	0
S:1537	0	0	0	0	0	0	2	0	0	0	2	2	0	3	0	0	0	0	0	0
S:1538	0	0	0	0	1	0	2	0	0	0	1	2	0	3	0	0	0	0	0	1
S:1539	0	0	0	0	0	0	3	0	0	0	2	2	0	1	0	0	0	0	0	1
S:1540	0	0	0	0	1	0	0	0	0	0	0	0	2	3	0	0	0	0	0	0
S:1541	0	0	0	0	0	0	0	0	0	0	2	2	0	3	0	0	0	0	0	1
S:1542	0	0	0	0	0	0	0	0	0	0	0	0	0	6	0	0	0	0	0	0
S:1543	0	0	0	0	3	2	5	0	1	2	5	4	0	0	1	2	0	0	0	4
S:1544	0	0	0	0	2	0	3	0	0	0	1	1	0	1	0	0	0	0	0	1
S:1545	1	0	0	0	1	0	4	0	0	0	1	2	0	1	0	0	0	0	0	2
S:1546	0	1	0	0	2	0	2	0	0	0	2	2	0	1	0	1	0	0	0	1
S:1547	0	0	0	0	2	1	3	0	1	1	2	2	0	3	0	1	0	0	0	2
S:1548	0	1	0	0	2	0	3	1	0	1	2	3	0	2	0	1	0	0	1	1
S:1549	0	0	0	0	1	0	3	0	2	0	1	1	0	1	0	0	0	0	0	1
S:1550	0	0	0	0	1	1	3	0	0	0	0	1	1	2	0	3	0	0	0	0
S:1551	0	0	0	0	1	0	4	0	0	0	2	2	0	2	0	0	0	0	0	3
S:1552	0	0	0	0	3	1	1	0	0	1	1	4	0	2	0	1	0	0	0	3
S:1553	0	0	0	0	1	0	1	0	0	0	1	1	2	3	0	1	0	0	0	1
S:1554	0	0	0	0	1	0	3	0	0	0	1	2	0	4	0	0	0	0	0	1
S:1555	0	1	0	0	1	0	1	0	0	0	0	1	0	3	0	0	0	0	0	2
S:1556	0	0	0	0	3	0	3	0	0	0	3	1	0	0	0	0	0	0	0	1
S:1557	0	1	0	0	0	0	3	0	0	0	3	2	0	1	0	0	0	0	0	1
S:1558	0	0	0	0	0	0	4	0	0	0	1	2	0	2	0	0	0	0	0	2
S:1559	1	0	0	0	2	0	3	0	0	0	2	2	0	1	0	0	0	0	0	1
S:1560	0	0	0	0	0	0	1	0	0	0	2	1	0	6	0	0	0	0	0	1
S:1561	0	0	0	0	4	1	5	0	1	0	5	4	1	0	0	1	0	0	0	4
S:1562	0	0	0	0	0	0	1	0	1	0	0	1	0	5	0	0	0	0	0	1
S:1563	0	0	0	3	3	0	4	0	0	0	3	4	0	0	0	2	0	0	1	1
S:1564	0	0	0	0	4	0	8	0	2	2	2	4	0	1	0	0	0	0	0	0
S:1565	0	1	0	0	3	0	3	0	0	0	3	3	0	2	0	1	0	0	0	1
S:1566	0	0	0	0	2	1	5	0	0	0	2	2	0	3	0	0	0	0	0	1
S:1567	0	0	0	0	2	0	2	0	1	0	2	2	0	5	0	0	0	0	0	2
S:1568	0	0	0	0	1	1	2	1	1	0	3	2	0	1	0	1	0	0	0	1
S:1569	0	0	0	0	0	0	3	0	0	0	3	2	1	4	0	0	0	0	0	2
S:1570	0	0	0	0	3	1	8	0	0	0	4	4	0	0	0	0	0	0	0	5
S:1571	0	1	0	1	6	1	3	0	1	1	1	3	1	1	0	4	0	1	0	1
S:1572	0	0	0	2	2	0	6	0	0	0	2	2	2	1	0	3	0	0	1	2
S:1573	0	0	0	0	1	0	2	0	1	0	0	1	0	5	0	0	0	0	0	1
S:1574	0	0	0	0	2	1	6	0	0	0	2	3	0	3	0	0	0	0	0	2
S:1575	0	0	0	0	1	1	2	1	1	0	3	2	0	3	0	1	0	0	0	1
S:1576	0	0	0	0	4	0	6	0	0	0	3	4	0	1	0	0	0	0	0	3
S:1577	0	2	0	0	3	1	4	1	0	2	2	3	0	4	0	4	0	1	0	2
S:1578	1	0	0	0	2	0	7	0	0	0	1	0	0	1	0	1	0	0	0	0
S:1579	0	0	0	0	2	0	7	0	0	0	5	6	0	1	0	0	0	0	0	5
S:1580	0	0	0	0	3	0	3	0	0	0	2	1	0	5	0	1	0	0	0	2
S:1581	0	0	0	0	1	0	4	0	0	0	3	3	0	5	0	1	0	0	0	1
S:1582	0	0	0	0	2	0	4	0	0	0	1	1	2	5	0	1	0	0	0	2
S:1583	0	0	0	0	4	0	6	0	0	0	4	3	0	2	0	1	0	0	0	4
S:1584	1	1	0	0	5	0	1	1	0	1	2	5	0	3	0	2	0	0	0	3
S:1585	0	0	0	2	2	0	10	0	0	0	2	2	2	1	0	3	0	0	1	2
S:1586	0	0	0	0	5	1	5	0	0	0	2	3	1	3	0	4	0	1	0	3
S:1587	0	0	0	0	4	0	5	0	1	0	3	2	0	5	0	1	0	0	0	2
S:1588	0	0	0	0	3	1	8	0	0	0	2	3	0	3	0	0	0	0	0	4
S:1589	0	2	0	0	2	1	8	0	0	0	3	1	0	1	0	0	0	0	0	1
S:1590	1	1	0	0	4	1	7	0	0	0	2	3	0	3	0	0	0	0	0	3
S:1591	0	0	0	0	2	0	13	0	0	0	4	5	0	6	0	0	0	0	0	5
S:1592	0	1	0	0	6	1	5	0	0	0	3	3	1	6	0	2	0	0	1	3
S:1593	0	0	0	0	3	0	8	0	0	0	3	2	0	5	0	0	0	0	0	2
S:1594	0	0	0	0	3	0	4	0	0	0	5	4	0	8	0	0	0	0	0	2
S:1595	0	0	0	0	3	0	13	0	0	0	4	6	0	6	0	0	0	0	0	5
S:1596	0	0	0	2	4	0	9	0	0	0	7	8	0	2	0	2	0	0	1	5
S:1597	0	0	0	0	3	0	9	0	0	0	3	2	0	9	0	2	0	0	0	2
S:1598	0	1	0	0	10	2	8	0	2	1	7	5	2	7	0	3	0	0	1	5
S:1599	3	2	0	0	7	0	12	0	0	0	8	10	0	2	0	2	0	0	0	6
S:1600	0	1	0	0	5	0	7	0	0	0	4	4	0	10	0	1	0	0	0	6
S:1601	2	0	0	0	10	0	16	0	0	0	7	12	0	4	0	1	0	0	0	8
S:1602	0	0	0	4	7	2	12	0	0	0	4	7	1	7	0	6	0	1	2	3
S:1603	0	0	0	0	4	1	8	0	0	0	4	4	1	12	0	1	0	0	0	5
S:1604	1	3	0	1	6	0	17	0	0	0	4	8	0	11	0	1	0	0	0	4
S:1605	3	2	0	0	8	0	16	0	0	0	9	11	0	4	0	2	0	0	0	6
S:1606	0	3	0	0	6	0	18	1	2	0	6	6	0	8	0	1	1	0	0	3
S:1607	0	0	0	0	5	0	13	0	0	0	6	7	0	12	0	3	0	0	0	5
S:1608	1	4	0	1	7	0	19	1	0	0	7	11	0	12	0	1	0	0	1	6
S:1609	1	4	0	1	9	0	22	1	0	0	11	14	0	15	0	1	0	0	1	9
S:1610	0	1	0	0	12	0	15	0	0	0	10	9	0	18	0	2	0	0	0	10
S:1611	1	2	0	0	14	2	22	0	2	1	14	13	2	13	0	3	0	0	1	12
S:1612	2	1	0	0	8	2	29	0	1	2	8	14	1	18	0	1	0	0	0	7
S:1613	0	0	0	0	13	2	28	0	1	0	12	16	1	26	0	3	0	0	0	7
S:1614	0	1	0	0	10	1	27	0	0	0	12	14	1	27	0	3	0	0	0	13
S:1615	1	0	0	0	13	0	26	0	2	0	3	8	0	31	0	1	0	0	0	4
S:1616	0	1	0	0	12	1	33	0	1	0	16	20	1	35	0	6	0	0	0	15
S:1617	2	6	0	2	44	5	101	1	7	3	45	52	7	55	0	9	1	0	2	33
S:1618	8	13	0	9	124	13	259	3	11	3	134	159	13	173	0	33	1	2	6	105
S:1619	11	31	1	18	266	36	582	9	28	15	265	305	22	412	1	70	2	5	10	201
S:1620	13	33	1	18	288	38	607	9	29	16	278	319	22	431	2	75	2	5	10	213

## Sheet: term annotation(aligned to ont)
	Term	Name
S:1359	GO:0032259	methylation
S:1364	GO:0046872	metal ion binding
S:1375	GO:0047355	CDP-glycerol glycerophosphotransferase activity
S:1382	ARO:3002848	arr-3
S:1383	GO:0020037	heme binding
S:1384	GO:0006265	DNA topological change
S:1386	GO:0051259	protein complex oligomerization
S:1387	GO:0000746	conjugation
S:1389	GO:0042597	periplasmic space
S:1401	GO:0006203	dGTP catabolic process
S:1404	GO:0019556	histidine catabolic process to glutamate and formamide
S:1405	GO:0019629	propionate catabolic process, 2-methylcitrate cycle
S:1406	GO:0043571	maintenance of CRISPR repeat elements
S:1409	GO:0008811	chloramphenicol O-acetyltransferase activity
S:1411	GO:0071973	bacterial-type flagellum-dependent cell motility
S:1413	GO:0071468	cellular response to acidic pH
S:1418	ARO:3000662	norfloxacin
S:1421	GO:0006508	proteolysis
S:1426	GO:0090124	N-4 methylation of cytosine
S:1428	GO:0007165	signal transduction
S:1430	GO:0016301	kinase activity
S:1435	GO:0009036	type II site-specific deoxyribonuclease activity
S:1436	GO:0046353	aminoglycoside 3-N-acetyltransferase activity
S:1437	GO:0009405	pathogenesis
S:1442	GO:0030255	protein secretion by the type IV secretion system
S:1444	ARO:3002676	catB3
S:1449	ARO:3000419	quinolone resistance protein (qnr)
S:1450	ARO:3003836	qacH
S:1453	ARO:3004111	FosA6
S:1456	ARO:3000467	NDM-5
S:1457	ARO:3000114	aminoglycoside phosphotransferase (APH)
S:1463	GO:0004176	ATP-dependent peptidase activity
S:1464	GO:0110001	toxin-antitoxin complex
S:1465	GO:0051495	positive regulation of cytoskeleton organization
S:1467	GO:0003684	damaged DNA binding
S:1469	GO:0008484	sulfuric ester hydrolase activity
S:1472	GO:0015473	fimbrial usher porin activity
S:1474	GO:0015740	C4-dicarboxylate transport
S:1475	GO:0004156	dihydropteroate synthase activity
S:1478	GO:0000155	phosphorelay sensor kinase activity
S:1479	GO:0004115	3',5'-cyclic-AMP phosphodiesterase activity
S:1481	GO:0004540	ribonuclease activity
S:1484	GO:0003678	DNA helicase activity
S:1485	GO:0015556	C4-dicarboxylate transmembrane transporter activity
S:1486	GO:0006012	galactose metabolic process
S:1487	GO:0004553	hydrolase activity, hydrolyzing O-glycosyl compounds
S:1488	GO:0034220	ion transmembrane transport
S:1492	GO:0003896	DNA primase activity
S:1494	GO:0015035	protein disulfide oxidoreductase activity
S:1498	GO:0030170	pyridoxal phosphate binding
S:1499	GO:0044764	multi-organism cellular process
S:1500	GO:0097351	toxin-antitoxin pair type II binding
S:1501	ARO:3000456	thiamphenicol
S:1504	GO:0030655	beta-lactam antibiotic catabolic process
S:1507	GO:0004252	serine-type endopeptidase activity
S:1510	GO:0009882	blue light photoreceptor activity
S:1512	GO:0016987	sigma factor activity
S:1515	GO:0006545	glycine biosynthetic process
S:1517	GO:0016829	lyase activity
S:1519	GO:0046983	protein dimerization activity
S:1520	ARO:3000187	hydrolysis of beta-lactam antibiotic by serine beta-lactamase
S:1521	ARO:3004275	ANT(3'')
S:1525	GO:0003735	structural constituent of ribosome
S:1528	GO:0005515	protein binding
S:1530	GO:0005975	carbohydrate metabolic process
S:1533	GO:0016842	amidine-lyase activity
S:1534	GO:0030288	outer membrane-bounded periplasmic space
S:1535	GO:0043565	sequence-specific DNA binding
S:1536	GO:0017111	nucleoside-triphosphatase activity
S:1537	ARO:3000832	evgA
S:1539	GO:0015420	ATPase-coupled vitamin B12 transmembrane transporter activity
S:1540	GO:0045340	mercury ion binding
S:1541	GO:0019829	ATPase-coupled cation transmembrane transporter activity
S:1546	ARO:3002895	SAT-2
S:1550	GO:0140097	catalytic activity, acting on DNA
S:1552	GO:0008830	dTDP-4-dehydrorhamnose 3,5-epimerase activity
S:1553	GO:0046689	response to mercury ion
S:1554	GO:0003887	DNA-directed DNA polymerase activity
S:1555	GO:0009307	DNA restriction-modification system
S:1556	GO:0006313	transposition, DNA-mediated
S:1558	GO:0071555	cell wall organization
S:1561	GO:0032196	transposition
S:1563	ARO:3003479	tetR
S:1564	GO:0001558	regulation of cell growth
S:1565	GO:0018771	2-hydroxy-6-oxonona-2,4-dienedioate hydrolase activity
S:1567	GO:0006662	glycerol ether metabolic process
S:1568	GO:0003964	RNA-directed DNA polymerase activity
S:1570	GO:0019867	outer membrane
S:1571	GO:0004803	transposase activity
S:1572	ARO:3000105	phosphorylation of antibiotic conferring resistance
S:1574	GO:0043684	type IV secretion system complex
S:1575	GO:0006278	RNA-dependent DNA biosynthetic process
S:1577	GO:0008080	N-acetyltransferase activity
S:1580	GO:0004519	endonuclease activity
S:1581	GO:0008144	drug binding
S:1582	GO:0045893	positive regulation of transcription, DNA-templated
S:1584	ARO:0000060	ceftazidime
S:1585	GO:0016773	phosphotransferase activity, alcohol group as acceptor
S:1586	GO:0000150	recombinase activity
S:1587	GO:0004518	nuclease activity
S:1588	GO:0016887	ATPase activity
S:1591	GO:0007155	cell adhesion
S:1594	GO:0008168	methyltransferase activity
S:1596	ARO:0010002	major facilitator superfamily (MFS) antibiotic efflux pump
S:1600	GO:0006304	DNA modification
S:1601	GO:0055114	oxidation-reduction process
S:1602	GO:0006310	DNA recombination
S:1603	GO:0005524	ATP binding
S:1604	GO:0006261	DNA-dependent DNA replication
S:1605	GO:0016757	transferase activity, transferring glycosyl groups
S:1606	GO:0015074	DNA integration
S:1608	GO:0034645	cellular macromolecule biosynthetic process
S:1609	GO:0003700	DNA-binding transcription factor activity
S:1610	ARO:3000375	ErmB
S:1611	GO:0006259	DNA metabolic process
S:1613	ARO:3000451	protein(s) and two-component regulatory system modulating antibiotic efflux
S:1614	GO:0032555	purine ribonucleotide binding
S:1615	GO:0005198	structural molecule activity
S:1616	ARO:3000186	tetM
S:1617	ARO:0000040	streptomycin
S:1618	GO:0005488	binding
S:1619	ARO:3000000	determinant of antibiotic resistance
S:1620	ARO:1000002	mechanism of antibiotic resistance
