# Supplementary material for: PangenomeNet: a pan-genome-based network reveals functional modules on antimicrobial resistome for Escherichia coli strains
Source: BMC Bioinformatics. 2021 Nov 10;22:548. doi: 10.1186/s12859-021-04459-z (PMC8579557; doi:10.1186/s12859-021-04459-z)
Supplement: Supplementary file 9 — Additional file 9: Table S8. Pan-genome GO term consistency under different amino acid cutoff. [file 12859_2021_4459_MOESM9_ESM.xlsx]

## Sheet: Sheet1
Amino acid identity	consistency %	inconsistency %	clusters #
0.95	0.9986	0.0014	90439
0.9	0.998	0.002	67190
0.8	0.9967	0.0033	50273
0.7	0.9952	0.0048	41822
